# Supplementary material for: Organocatalytic enantioselective construction of axially chiral (1H)-isochromen-1-imines
Source: Royal Society of Chemistry journal article supplement (doi:10.1039/d2ob00379a), 2022-01-01

## Supporting Information

### Organocatalytic Enantioselective Construction of Axially Chiral (1*H*)-isochromen-1-imines

Ying Wang,<sup>a</sup> Yang Yang,<sup>b</sup> Shiyu Xu,<sup>b</sup> Aima Huang,<sup>a</sup> Lu Chen,<sup>a</sup> Yubao Xie,<sup>a</sup> Pengyutian Liu,<sup>a</sup> Liang Hong<sup>b</sup> and Guofeng Li<sup>\*a</sup>

<sup>a</sup>School of Pharmaceutical Sciences, Shenzhen University Health Science Centre, Shenzhen University, Shenzhen 518060, China.

<sup>b</sup>Guangdong Key Laboratory of Chiral Molecule and Drug Discovery, School of Pharmaceutical Sciences, Sun Yat-sen University, Guangzhou 510006, China.

E-mail: liguofeng@szu.edu.cn

**Index:**

|                                                                               |         |
|-------------------------------------------------------------------------------|---------|
| General information                                                           | S3      |
| General procedure and spectral data for the synthesis of <b>1</b>             | S4-S16  |
| <sup>1</sup> H NMR and enantioselectivities studies                           | S16     |
| General procedure and spectral data for the synthesis of <b>3</b>             | S17-S31 |
| General procedure and spectral data for the synthesis of <b>4</b>             | S32     |
| General procedure and spectral data for the synthesis of <b>5</b>             | S33-S42 |
| General procedure and spectral data for the synthesis of <b>6</b>             | S42     |
| Spectral data of <b>7</b> and <b>8</b>                                        | S43     |
| X-ray Structure of <b>3a</b>                                                  | S44-45  |
| References                                                                    | S46     |
| <b>Copies of HPLC spectrum</b>                                                | S47-93  |
| Copies of <sup>1</sup> H and <sup>13</sup> C NMR of <b>3, 4, 5, 6, 7 or 8</b> | S94-253 |

## General information

Unless stated otherwise, all reactions were carried out in flame dried glassware. All solvents were purified and dried according to standard methods prior to use.  $^1\text{H}$  NMR spectra was recorded on a Varian instrument (500 MHz or 400 MHz) and internally referenced to tetramethylsilane signal or residual protio solvent signals, while  $^{13}\text{C}$  NMR was recorded on a Varian instrument (125 MHz or 100 MHz). Data for  $^1\text{H}$  NMR are recorded as follows: chemical shift ( $\delta$ , ppm), multiplicity (s = singlet, d = doublet, t = triplet, m = multiplet, q = quartet or unresolved, coupling constant(s) in Hz, integration). Data for  $^{13}\text{C}$  NMR are reported in terms of chemical shift ( $\delta$ , ppm). IR spectra were recorded on a FT-IR spectrometer and only major peaks were reported in  $\text{cm}^{-1}$ . Optical rotations were reported as follows:  $[\alpha]_{\text{D}}^{20}$  (c: g/100 mL, in solvent). High resolution mass spectra (HRMS) were obtained by the ESI ionization sources. The ee value determination was carried out using chiral HPLC with Daicel Chiracel column on Thermo Fisher.

## General procedure and spectral data for the synthesis of **1**

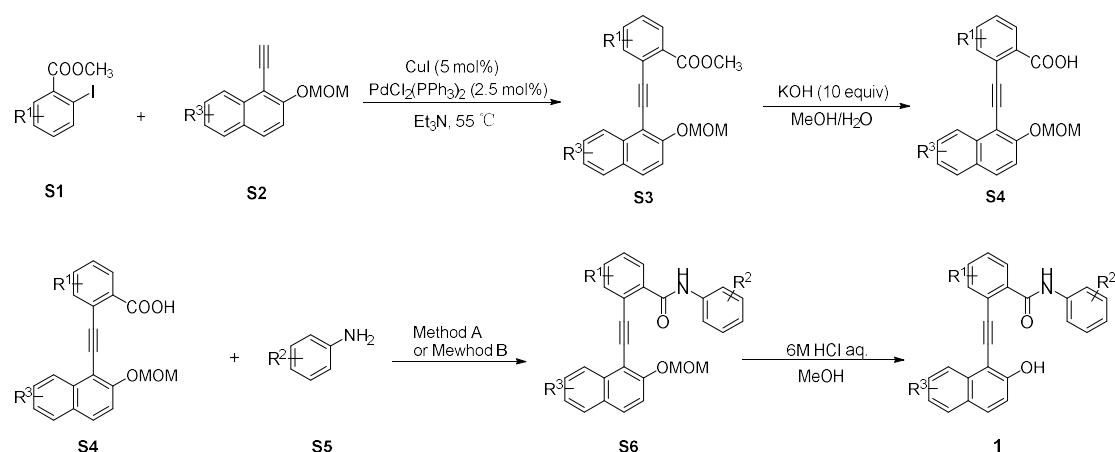

### General procedure for the synthesis of **S3**

Under argon atmosphere, to a stirred solution of **S1** (10 mmol, 1.0 equiv),  $\text{PdCl}_2(\text{PPh}_3)_2$  (2.5 mol%),  $\text{CuI}$  (5 mol%) in dry  $\text{Et}_3\text{N}$  (30 mL) was added **S2** (15 mmol, 1.5 equiv). Then the mixture was stirred for overnight at  $55\text{ }^\circ\text{C}$ . After the completion of the reaction which was indicated by TLC,  $\text{Et}_3\text{N}$  was evaporated in vacuo and the resulting crude residue was extracted with EA and washed with water. Then organic extracts were dried over anhydrous  $\text{Na}_2\text{SO}_4$  and concentrated in vacuo. The crude mixture was purified by flash chromatography (PE/EA 15:1) to afford **S3** as a yellow oil. The preparation of **S1** was followed the literature procedure.<sup>1</sup>

### General procedure for the synthesis of **S4**

To a mixture of **S3** (8 mmol, 1.0 equiv) and  $\text{KOH}$  (80 mmol, 10 equiv) were added the mixed solvent of  $\text{MeOH}$  (30 mL) and  $\text{H}_2\text{O}$  (15 mL). The mixture was stirred at room temperature until the completion of the reaction. Then, the pH of reaction mixture was adjusted to acidity at  $0\text{ }^\circ\text{C}$  and extracted with EA. The combined organic extracts were dried over anhydrous  $\text{Na}_2\text{SO}_4$  and concentrated in vacuo. **S4** could be obtained by crystallization using  $\text{CH}_2\text{Cl}_2/\text{PE}$  as a pale yellow solid.

### General procedure for the synthesis of **S6**

There are two methods to process this condensation reaction according to the different positions of the substituents. When  $\text{R}^2$  was at *meta* or *para* position of **S5**, the reaction was performed using method A, and otherwise, the method B was used.

**Method A:** Under argon atmosphere, to a stirred solution of **S4** (2 mmol, 1.0 equiv),  $\text{EDCI}$  (2.6 mmol, 1.3 equiv),  $\text{HOBT}$  (2.6 mmol, 1.3 equiv) and  $\text{Et}_3\text{N}$  (2.6 mmol, 1.3 equiv) in dry THF (10 mL) was added **S5** (2.4 mmol, 1.2 equiv). The mixture was stirred at room temperature until the completion of the reaction was indicated by TLC. Then, the reaction mixture was extracted with ethyl acetate, washed with water, dried over anhydrous  $\text{Na}_2\text{SO}_4$  and concentrated in vacuo. The crude mixture was purified by flash chromatography to afford the desired **S6** as a white solid.

**Method B:** Under argon atmosphere, the mixture solution of  $\text{EEDQ}$  (2 mmol, 1.0 equiv) and **S4** (2 mmol, 1.0 equiv) in  $\text{CH}_2\text{Cl}_2$  (10 mL) was stirred at room temperature. After half an hour later, **S5**

(2.4 mmol, 1.2 equiv) was added. The mixture was stirred at room temperature until the completion of the reaction was indicated by TLC. Then, the reaction mixture was extracted with ethyl acetate, washed with water, dried over anhydrous  $\text{Na}_2\text{SO}_4$  and concentrated in vacuo. The crude mixture was purified by flash chromatography to afford the desired **S6** as a white solid.

### General procedure for the synthesis of **1**

To a stirred solution of **S6** (2 mmol, 1.0 equiv) in MeOH (10 mL) was added a few drops of 6M HCl aq. at room temperature. The mixture was stirred at room temperature until the completion of the reaction. Then, the reaction mixture was extracted with ethyl acetate, washed with water, dried over anhydrous  $\text{Na}_2\text{SO}_4$  and concentrated in vacuo. The crude mixture was purified by flash chromatography to afford the desired **1** as a pale yellow solid.

### Spectral data for *o*-alkynylbenzamide **1**

#### 2-((2-hydroxynaphthalen-1-yl)ethynyl)-*N*-phenylbenzamide (**1a**)

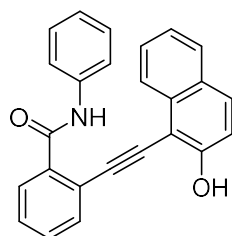

$^1\text{H NMR}$  (400 MHz,  $\text{DMSO}-d_6$ ):  $\delta$  10.62 (s, 1H), 10.24 (s, 1H), 8.09 (d,  $J = 7.9$  Hz, 1H), 7.85 (d,  $J = 7.4$  Hz, 2H), 7.78 (dd,  $J = 12.7, 8.2$  Hz, 3H), 7.65 (d,  $J = 9.2$  Hz, 1H), 7.62 – 7.49 (m, 2H), 7.37 (t,  $J = 7.9$  Hz, 2H), 7.28 – 7.18 (m, 2H), 7.16 – 7.07 (t, 1H), 7.06 – 6.94 (t, 1H).

$^{13}\text{C NMR}$  (100 MHz,  $\text{DMSO}-d_6$ ):  $\delta$  166.8, 157.9, 139.4, 139.2, 133.9, 132.2, 130.6, 129.8, 128.7, 128.2, 128.0, 127.5, 127.4, 126.9, 124.6, 123.6, 123.4, 120.9, 119.7, 117.8, 102.0, 96.1, 88.4.

**IR (KBr,  $\text{cm}^{-1}$ ):** 3298, 3120, 2200, 1658, 1582, 1478, 1201, 744, 676.

**HRMS (ESI):**  $\text{C}_{25}\text{H}_{17}\text{NO}_2 + \text{H}$ , Calc: 364.1328, Found: 364.1332.

#### 2-((2-hydroxynaphthalen-1-yl)ethynyl)-*N*-(*o*-tolyl)benzamide (**1b**)

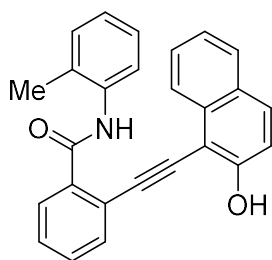

$^1\text{H NMR}$  (400 MHz,  $\text{DMSO}-d_6$ ):  $\delta$  10.19 (s, 1H), 10.02 (d,  $J = 4.1$  Hz, 1H), 8.19 (d,  $J = 8.2$  Hz, 1H), 7.92 – 7.69 (m, 4H), 7.57 (dd,  $J = 15.7, 7.0$  Hz, 3H), 7.38 – 7.07 (m, 6H), 2.24 (s, 3H).

$^{13}\text{C NMR}$  (125 MHz,  $\text{DMSO}-d_6$ ):  $\delta$  166.6, 158.0, 138.5, 136.2, 133.9, 132.8, 132.6, 130.7, 130.4, 130.0, 128.2, 128.1, 127.9, 127.4, 127.1, 125.9, 125.8, 125.7, 124.6, 123.5, 121.1, 117.8, 102.1, 96.4, 88.5, 18.0.

**IR (KBr,  $\text{cm}^{-1}$ ):** 3324, 3221, 1654, 1508, 1328, 1200, 831, 743, 621.

**HRMS (ESI):**  $\text{C}_{26}\text{H}_{19}\text{NO}_2 + \text{H}$ , Calc: 378.1489, Found: 378.1489.

**N-(2-ethoxyphenyl)-2-((2-hydroxynaphthalen-1-yl)ethynyl)benzamide(1c)**

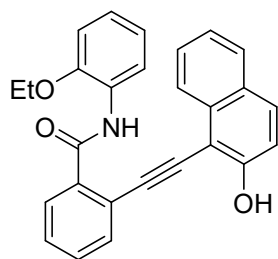

**<sup>1</sup>H NMR** (400 MHz, Acetone-*d*<sub>6</sub>): δ 9.25 (s, 1H), 8.91 (s, 1H), 8.50 (d, *J* = 8.2 Hz, 1H), 8.20 (d, *J* = 7.8 Hz, 1H), 8.02 – 7.80 (m, 4H), 7.65 (t, *J* = 7.6 Hz, 1H), 7.57 (t, *J* = 7.5 Hz, 1H), 7.42 – 7.30 (m, 2H), 7.23 (d, *J* = 8.9 Hz, 1H), 7.11 (t, *J* = 7.8 Hz, 1H), 7.03 (t, *J* = 7.7 Hz, 1H), 6.97 (d, *J* = 8.9 Hz, 1H), 3.94 (q, *J* = 7.0 Hz, 2H), 1.21 (t, *J* = 7.0 Hz, 3H).

**<sup>13</sup>C NMR** (100 MHz, Acetone-*d*<sub>6</sub>): δ 165.6, 159.9, 149.6, 137.8, 134.7, 133.9, 132.1, 131.9, 129.5, 129.2, 129.1, 128.7, 128.2, 125.6, 125.6, 124.7, 122.8, 121.7, 121.4, 118.5, 112.4, 103.1, 99.0, 89.9, 64.9, 14.8.

**IR (KBr, cm<sup>-1</sup>):** 3376, 3216, 1721, 1525, 1311, 1089, 790, 745, 641.

**HRMS (ESI):** C<sub>27</sub>H<sub>21</sub>NO<sub>3</sub>+H, Calc: 408.1603, Found: 408.1594.

**N-(2-fluorophenyl)-2-((2-hydroxynaphthalen-1-yl)ethynyl)benzamide(1d)**

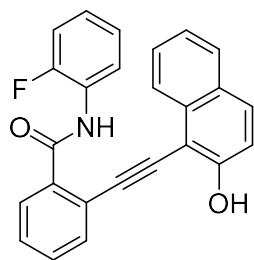

**<sup>1</sup>H NMR** (400 MHz, Acetone-*d*<sub>6</sub>): δ 9.65 (s, 1H), 8.81 (s, 1H), 8.24 (t, *J* = 8.3 Hz, 2H), 8.01 (d, *J* = 7.7 Hz, 1H), 7.95 – 7.80 (m, 3H), 7.71 – 7.63 (m, 1H), 7.57 (t, *J* = 7.6 Hz, 1H), 7.47 (t, *J* = 7.1 Hz, 1H), 7.36 (t, *J* = 7.5 Hz, 1H), 7.31 – 7.15 (m, 4H).

**<sup>19</sup>F NMR** (376 MHz, Acetone-*d*<sub>6</sub>): δ -126.33.

**<sup>13</sup>C NMR** (125 MHz, Acetone-*d*<sub>6</sub>): δ 167.4, 159.9, 156.5, 136.0 (d, *J* = 302.4 Hz), 133.8, 132.1, 132.1, 129.6 (d, *J* = 34.0 Hz), 129.2, 129.2, 128.3, 127.2 (d, *J* = 34.0 Hz), 127.0 (d, *J* = 34.0 Hz), 125.6, 125.3 (d, *J* = 3.8 Hz), 124.8, 123.0, 118.5, 116.4 (d, *J* = 66.8 Hz), 103.2, 99.1, 89.6.

**IR (KBr, cm<sup>-1</sup>):** 3402, 3306, 1778, 1622, 1212, 976, 775, 752, 701.

**HRMS (ESI):** C<sub>25</sub>H<sub>16</sub>FNO<sub>2</sub>+H, Calc: 382.1265, Found: 382.1238.

**N-(2-chlorophenyl)-2-((2-hydroxynaphthalen-1-yl)ethynyl)benzamide (1e)**

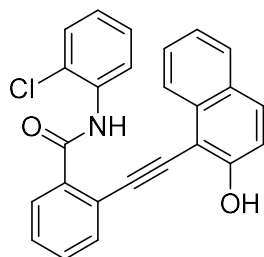

**<sup>1</sup>H NMR** (400 MHz, DMSO-*d*<sub>6</sub>): δ 9.99 (s, 2H), 8.18 (d, *J* = 9.3 Hz, 1H), 7.87 (d, *J* = 7.7 Hz, 1H), 7.85 – 7.71 (m, 4H), 7.61 (t, *J* = 7.2 Hz, 1H), 7.54 (dd, *J* = 15.5, 7.8 Hz, 2H), 7.39 (t, *J* = 7.6 Hz, 1H), 7.35 – 7.25 (m, 3H), 7.22 (d, *J* = 8.9 Hz, 1H).

**<sup>13</sup>C NMR** (125 MHz, DMSO-*d*<sub>6</sub>): δ 166.4, 158.3, 138.1, 134.8, 134.0, 132.7, 130.7, 130.4, 129.6, 128.2, 128.1, 127.4, 127.4, 127.1, 127.0, 124.5, 123.4, 121.2, 117.9, 102.0, 96.1, 89.2.

**IR (KBr, cm<sup>-1</sup>):** 3287, 3109, 1725, 1627, 1378, 1129, 775, 677, 638.

**HRMS (ESI):** C<sub>25</sub>H<sub>16</sub>ClNO<sub>2</sub>+H, Calc: 398.0954, Found: 398.0942.

### 2-((2-hydroxynaphthalen-1-yl)ethynyl)-N-(*m*-tolyl)benzamide (1f)

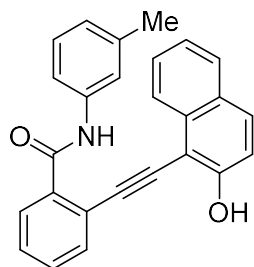

**<sup>1</sup>H NMR** (400 MHz, DMSO-*d*<sub>6</sub>): δ 10.53 (s, 1H), 10.24 (s, 1H), 8.14 (d, *J* = 8.3 Hz, 1H), 7.99 – 7.74 (m, 3H), 7.71 (s, 1H), 7.64 (t, *J* = 7.2 Hz, 2H), 7.54 (dt, *J* = 14.8, 7.5 Hz, 2H), 7.37 – 7.15 (m, 3H), 7.07 (t, *J* = 7.6 Hz, 1H), 6.93 (d, *J* = 7.6 Hz, 1H), 2.29 (s, 3H).

**<sup>13</sup>C NMR** (100 MHz, DMSO-*d*<sub>6</sub>): δ 166.7, 157.9, 139.3, 139.3, 137.8, 133.9, 132.2, 130.6, 129.8, 128.6, 128.2, 128.0, 127.5, 127.4, 127.0, 124.7, 124.3, 123.4, 120.9, 120.3, 117.8, 117.0, 102.1, 96.1, 88.4, 21.3.

**IR (KBr, cm<sup>-1</sup>):** 3389, 3170, 1733, 1674, 1387, 1023, 835, 792, 724.

**HRMS (ESI):** C<sub>26</sub>H<sub>19</sub>NO<sub>2</sub>+H, Calc: 378.1521, Found: 378.1489.

### 2-((2-hydroxynaphthalen-1-yl)ethynyl)-N-(3-(methylthio)phenyl)benzamide (1g)

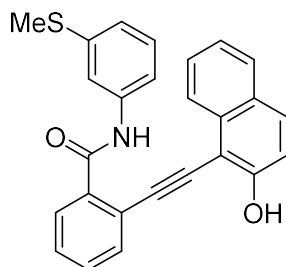

**<sup>1</sup>H NMR** (400 MHz, DMSO-*d*<sub>6</sub>): δ 10.63 (s, 1H), 10.24 (s, 1H), 8.10 (d, *J* = 8.4 Hz, 1H), 7.88 – 7.74 (m, 4H), 7.65 (d, *J* = 7.6 Hz, 1H), 7.58 (t, *J* = 8.4 Hz, 2H), 7.52 (t, *J* = 7.5 Hz, 1H), 7.35 – 7.17 (m, 3H), 7.08 (t, *J* = 7.7 Hz, 1H), 7.01 (d, *J* = 7.8 Hz, 1H), 2.43 (s, 3H).

**<sup>13</sup>C NMR** (125 MHz, DMSO-*d*<sub>6</sub>): δ 166.9, 157.9, 139.8, 139.1, 138.6, 133.9, 132.2, 130.6, 129.9, 129.2, 128.2, 128.1, 127.5, 127.4, 126.9, 124.6, 123.4, 121.0, 120.9, 117.8, 116.8, 116.2, 102.0, 96.0, 88.4, 14.7.

**IR (KBr, cm<sup>-1</sup>):** 3366, 3202, 1789, 1623, 1436, 1373, 852, 742, 676.

**HRMS (ESI):** C<sub>26</sub>H<sub>19</sub>NO<sub>2</sub>S+H, Calc: 410.1238, Found: 410.1209

### N-(3-bromophenyl)-2-((2-hydroxynaphthalen-1-yl)ethynyl)benzamide (1h)

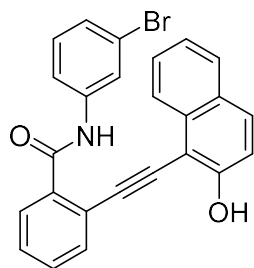

**<sup>1</sup>H NMR** (400 MHz, DMSO-*d*<sub>6</sub>): δ 10.81 (s, 1H), 10.31 (s, 1H), 8.25 (d, *J* = 2.4 Hz, 1H), 8.09 (d, *J* = 8.3 Hz, 1H), 7.77 (t, *J* = 12.5 Hz, 4H), 7.67 (d, *J* = 8.8 Hz, 1H), 7.59 (t, *J* = 6.8 Hz, 1H), 7.53 (t, *J* = 6.9 Hz, 1H), 7.36 – 7.20 (m, 4H), 7.11 (t, *J* = 7.6 Hz, 1H).

**<sup>13</sup>C NMR** (100 MHz, DMSO-*d*<sub>6</sub>): δ 167.1, 158.0, 140.9, 138.9, 133.9, 132.3, 130.8, 130.7, 130.0, 128.2, 128.1, 127.5, 127.4, 126.9, 126.3, 124.4, 123.4, 122.0, 121.6, 121.0, 118.5, 117.9, 102.0, 95.8, 88.6.

**IR (KBr, cm<sup>-1</sup>):** 3289, 3108, 1726, 1583, 1366, 1099, 846, 805, 632.

**HRMS (ESI):** C<sub>26</sub>H<sub>16</sub>BrNO<sub>2</sub>+H, Calc: 442.0457, Found: 442.0437.

#### N-(3-chlorophenyl)-2-((2-hydroxynaphthalen-1-yl)ethynyl)benzamide (1i)

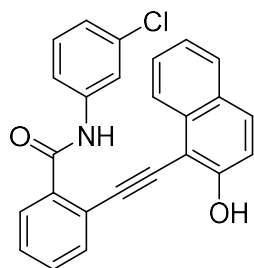

**<sup>1</sup>H NMR** (400 MHz, DMSO-*d*<sub>6</sub>): δ 10.82 (s, 1H), 10.30 (s, 1H), 8.09 (d, *J* = 8.1 Hz, 2H), 7.88 – 7.74 (m, 3H), 7.68 (dd, *J* = 14.6, 7.8 Hz, 2H), 7.59 (t, *J* = 7.6 Hz, 1H), 7.53 (t, *J* = 7.5 Hz, 1H), 7.39 (t, *J* = 8.1 Hz, 1H), 7.25 (dd, *J* = 12.8, 8.3 Hz, 2H), 7.18 (d, *J* = 5.6 Hz, 1H), 7.09 (t, *J* = 7.6 Hz, 1H).

**<sup>13</sup>C NMR** (100 MHz, DMSO-*d*<sub>6</sub>): δ 167.1, 158.0, 140.8, 138.9, 138.9, 133.9, 133.1, 132.3, 130.7, 130.4, 130.0, 128.2, 128.1, 127.5, 127.4, 126.8, 124.4, 123.4, 123.3, 121.0, 119.1, 118.1, 117.9, 102.0, 95.8, 88.5.

**IR (KBr, cm<sup>-1</sup>):** 3401.6, 3189, 1944, 1634, 1478, 1145, 902, 783, 684.

**HRMS (ESI):** C<sub>25</sub>H<sub>16</sub>ClNO<sub>2</sub>+H, Calc: 398.0939, Found: 398.0942.

#### N-(4-ethylphenyl)-2-((2-hydroxynaphthalen-1-yl)ethynyl)benzamide (1j)

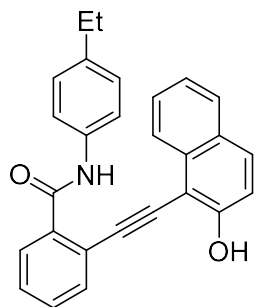

**<sup>1</sup>H NMR** (400 MHz, DMSO-*d*<sub>6</sub>): δ 10.53 (s, 1H), 10.21 (s, 1H), 8.10 (d, *J* = 8.3 Hz, 1H), 7.84 – 7.70 (m, 5H), 7.65 (d, *J* = 7.5 Hz, 1H), 7.57 (t, *J* = 6.9 Hz, 1H), 7.51 (t, *J* = 7.3 Hz, 1H), 7.28 – 7.12 (m, 4H), 7.03 (t, *J* = 7.6 Hz, 1H), 2.59 (q, *J* = 7.6 Hz, 2H), 1.18 (t, *J* = 7.6 Hz, 3H).



$^{13}\text{C}$  NMR (100 MHz, DMSO- $d_6$ ):  $\delta$  166.6, 157.9, 139.3, 139.1, 137.1, 133.9, 132.2, 130.6, 129.8, 128.1, 128.0, 127.9, 127.5, 127.4, 127.0, 124.6, 123.4, 120.9, 119.8, 117.8, 102.1, 96.2, 88.3, 27.7, 15.9.

IR (KBr,  $\text{cm}^{-1}$ ): 3232, 2999, 1739, 1539, 1429, 1308, 1199, 828, 674.

HRMS (ESI):  $\text{C}_{27}\text{H}_{21}\text{NO}_2+\text{H}$ , Calc: 392.1668, Found: 392.1645.

**N-(4-ethylphenyl)-2-((2-hydroxynaphthalen-1-yl)ethynyl)benzamide (1k)**

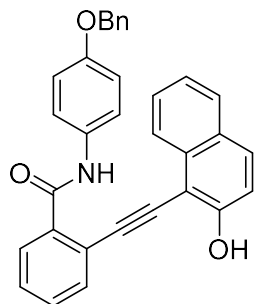

$^1\text{H}$  NMR (400 MHz, DMSO- $d_6$ ):  $\delta$  10.65 (s, 1H), 10.33 (s, 1H), 8.14 (d,  $J = 8.3$  Hz, 1H), 7.85 – 7.74 (m, 3H), 7.66 (d,  $J = 7.7$  Hz, 2H), 7.59 (t,  $J = 6.8$  Hz, 1H), 7.53 (t,  $J = 7.3$  Hz, 1H), 7.39 (ddd,  $J = 24.0, 17.7, 7.2$  Hz, 6H), 7.25 (dd,  $J = 14.1, 8.4$  Hz, 3H), 7.09 (t,  $J = 7.6$  Hz, 1H), 6.79 (d,  $J = 8.2$  Hz, 1H), 5.07 (s, 2H).

$^{13}\text{C}$  NMR (100 MHz, DMSO- $d_6$ ):  $\delta$  166.8, 158.6, 157.9, 140.5, 139.2, 137.0, 133.9, 132.2, 130.6, 129.9, 129.5, 128.4, 128.2, 128.0, 127.8, 127.6, 127.5, 127.4, 127.0, 124.6, 123.4, 120.9, 117.8, 112.4, 109.7, 106.6, 102.1, 96.0, 88.4, 69.2.

IR (KBr,  $\text{cm}^{-1}$ ): 3339, 3135, 1739, 1679, 1451, 1374, 1003, 812, 732.

HRMS (ESI):  $\text{C}_{32}\text{H}_{23}\text{NO}_3+\text{H}$ , Calc: 470.1795, Found: 470.1751.

**N-(4-fluorophenyl)-2-((2-hydroxynaphthalen-1-yl)ethynyl)benzamide (1l)**

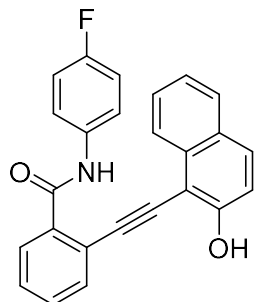

$^1\text{H}$  NMR (400 MHz, DMSO- $d_6$ ):  $\delta$  10.69 (s, 1H), 10.26 (s, 1H), 8.09 (d,  $J = 8.4$  Hz, 1H), 7.88 (dd,  $J = 9.1, 5.1$  Hz, 2H), 7.83 – 7.73 (m, 3H), 7.66 (d,  $J = 7.5$  Hz, 1H), 7.58 (t,  $J = 7.6$  Hz, 1H), 7.52 (t,  $J = 7.3$  Hz, 1H), 7.23 (q,  $J = 10.0, 8.8$  Hz, 4H), 7.09 (t,  $J = 7.6$  Hz, 1H).

$^{19}\text{F}$  NMR (376 MHz, DMSO):  $\delta$  -118.79.

$^{13}\text{C}$  NMR (125 MHz, DMSO- $d_6$ ):  $\delta$  166.7, 158.2(d,  $J = 220.7$  Hz), 158.0, 139.1, 135.8, 133.9, 132.3, 130.6, 129.9, 128.1(d,  $J = 11.3$  Hz), 127.5(d,  $J = 21.4$  Hz), 126.9, 124.4, 123.4, 121.4, 121.4, 121.0, 117.8, 115.3(d,  $J = 22.7$  Hz), 102.0, 96.0, 88.4.

IR (KBr,  $\text{cm}^{-1}$ ): 3356, 3145, 1875, 1573, 1480, 989, 910, 776, 676.

HRMS (ESI):  $\text{C}_{25}\text{H}_{16}\text{FNO}_2+\text{H}$ , Calc: 382.1239, Found: 382.1238.

**N-(4-chlorophenyl)-2-((2-hydroxynaphthalen-1-yl)ethynyl)benzamide (1m)**

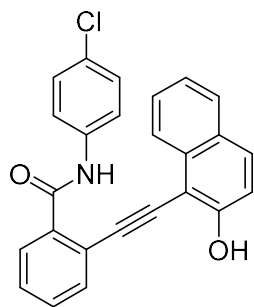

**<sup>1</sup>H NMR** (400 MHz, DMSO-*d*<sub>6</sub>): δ 10.75 (s, 1H), 10.25 (s, 1H), 8.08 (d, *J* = 8.4 Hz, 1H), 7.89 (d, *J* = 8.8 Hz, 2H), 7.79 (t, *J* = 9.5 Hz, 3H), 7.66 (d, *J* = 7.6 Hz, 1H), 7.59 (t, *J* = 7.4 Hz, 1H), 7.53 (d, *J* = 7.5 Hz, 1H), 7.43 (d, *J* = 8.8 Hz, 2H), 7.32 – 7.17 (m, 2H), 7.10 (t, *J* = 7.6 Hz, 1H).

**<sup>13</sup>C NMR** (100 MHz, DMSO-*d*<sub>6</sub>): δ 166.9, 158.0, 139.0, 138.3, 133.9, 132.3, 130.7, 130.0, 128.6, 128.2, 128.1, 127.6, 127.4, 127.2, 126.9, 124.4, 123.4, 121.2, 121.0, 117.8, 102.0, 96.0, 88.5.

**IR (KBr, cm<sup>-1</sup>):** 3401, 3276, 2131, 1657, 1532, 1146, 1001, 778, 688.

**HRMS (ESI):** C<sub>26</sub>H<sub>16</sub>ClNO<sub>2</sub>+H, Calc: 398.0934, Found: 398.1209.

### 2-((2-hydroxynaphthalen-1-yl)ethynyl)-N-(4-iodophenyl)benzamide (1n)

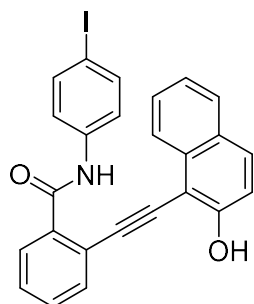

**<sup>1</sup>H NMR** (400 MHz, DMSO-*d*<sub>6</sub>): δ 10.72 (s, 1H), 10.25 (s, 1H), 8.08 (d, *J* = 8.3 Hz, 1H), 7.87 – 7.74 (m, 3H), 7.68 (d, *J* = 23.1 Hz, 5H), 7.59 (t, *J* = 7.5 Hz, 1H), 7.53 (t, *J* = 7.5 Hz, 1H), 7.28 (t, *J* = 7.5 Hz, 1H), 7.23 (d, *J* = 8.9 Hz, 1H), 7.11 (t, *J* = 7.6 Hz, 1H).

**<sup>13</sup>C NMR** (100 MHz, DMSO-*d*<sub>6</sub>): δ 166.9, 158.0, 139.2, 139.0, 137.4, 133.9, 132.3, 130.7, 130.0, 128.2, 128.1, 127.5, 127.4, 127.0, 124.4, 123.4, 121.8, 120.9, 117.8, 102.0, 96.0, 88.5, 87.2.

**IR (KBr, cm<sup>-1</sup>):** 3336, 3285, 1638, 1508, 1202, 998, 832, 743, 683.

**HRMS (ESI):** C<sub>26</sub>H<sub>16</sub>INO<sub>2</sub>+H, Calc: 490.0322, Found: 490.0299.

### N-(2,3-dimethylphenyl)-2-((2-hydroxynaphthalen-1-yl)ethynyl)benzamide (1o)

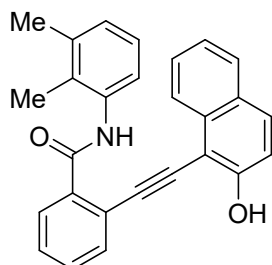

**<sup>1</sup>H NMR** (400 MHz, DMSO-*d*<sub>6</sub>): δ 10.18 (s, 1H), 10.07 (s, 1H), 8.20 (d, *J* = 8.2 Hz, 1H), 7.80 (td, *J* = 13.3, 12.2, 8.2 Hz, 4H), 7.57 (m, *J* = 14.9, 7.4 Hz, 2H), 7.44 – 7.21 (m, 4H), 7.09 (d, *J* = 7.2 Hz, 2H), 2.23 (s, 3H), 2.11 (s, 3H).

$^{13}\text{C}$  NMR (100 MHz, DMSO- $d_6$ ):  $\delta$  166.7, 158.0, 138.5, 137.0, 136.0, 133.9, 132.6, 132.0, 130.7, 130.0, 128.2, 128.1, 127.9, 127.4, 127.4, 127.1, 125.2, 124.7, 124.2, 123.5, 121.1, 117.8, 102.1, 96.5, 88.5, 20.1, 14.3.

IR (KBr,  $\text{cm}^{-1}$ ): 3373, 3209, 2200, 1738, 1616, 1276, 1066, 819, 751.

HRMS (ESI):  $\text{C}_{27}\text{H}_{21}\text{NO}_2+\text{H}$ , Calc: 392.1660, Found: 392.1645.

**N-(3,4-dimethylphenyl)-2-((2-hydroxynaphthalen-1-yl)ethynyl)benzamide (1p)**

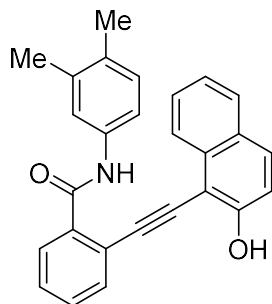

$^1\text{H}$  NMR (400 MHz, DMSO- $d_6$ ):  $\delta$  10.43 (s, 1H), 10.21 (s, 1H), 8.17 (d,  $J = 8.4$  Hz, 1H), 7.86 – 7.71 (m, 3H), 7.68 – 7.61 (m, 2H), 7.60 – 7.46 (m, 3H), 7.28 (t,  $J = 7.5$  Hz, 1H), 7.23 (d,  $J = 8.9$  Hz, 1H), 7.17 – 7.07 (m, 2H), 2.19 (s, 6H).

$^{13}\text{C}$  NMR (100 MHz, DMSO- $d_6$ ):  $\delta$  166.5, 157.9, 139.3, 137.0, 136.2, 133.9, 132.3, 131.4, 130.6, 129.8, 129.5, 128.2, 128.0, 127.6, 127.4, 127.0, 124.7, 123.5, 121.0, 117.8, 117.3, 102.1, 96.2, 88.3, 19.7, 18.8.

IR (KBr,  $\text{cm}^{-1}$ ): 3372, 3208, 2199, 1740, 1629, 1277, 1071, 819, 750.

HRMS (ESI):  $\text{C}_{27}\text{H}_{21}\text{NO}_2+\text{H}$ , Calc: 392.1666, Found: 392.1645.

**N-(3,4-dimethoxyphenyl)-2-((2-hydroxynaphthalen-1-yl)ethynyl)benzamide (1q)**

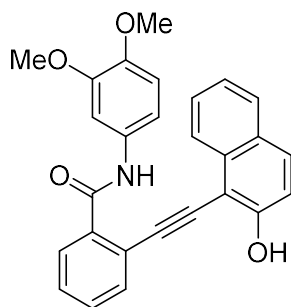

$^1\text{H}$  NMR (400 MHz, Acetone- $d_6$ ):  $\delta$  9.75 (s, 1H), 8.96 (s, 1H), 8.26 (d,  $J = 8.3$  Hz, 1H), 7.95 – 7.81 (m, 4H), 7.67 – 7.59 (m, 2H), 7.57 – 7.47 (m, 2H), 7.37 (t,  $J = 7.5$  Hz, 2H), 7.22 (d,  $J = 8.9$  Hz, 1H), 6.95 (d,  $J = 8.6$  Hz, 1H), 3.81 (s, 6H).

$^{13}\text{C}$  NMR (125 MHz, Acetone- $d_6$ ):  $\delta$  167.2, 160.1, 150.4, 147.4, 138.3, 134.6, 133.4, 132.1, 131.7, 129.2, 129.2, 128.9, 128.4, 125.6, 124.8, 124.8, 123.0, 123.0, 118.6, 113.4, 113.1, 106.7, 103.2, 99.5, 89.2, 56.5, 56.1.

IR (KBr,  $\text{cm}^{-1}$ ): 3256, 3176, 1730, 1651, 1450, 1206, 1049, 822, 743.

HRMS (ESI):  $\text{C}_{27}\text{H}_{21}\text{NO}_4+\text{H}$ , Calc: 424.1565, Found: 424.1543.

**N-(4-chloro-2-methylphenyl)-2-((2-hydroxynaphthalen-1-yl)ethynyl)benzamide (1r)**

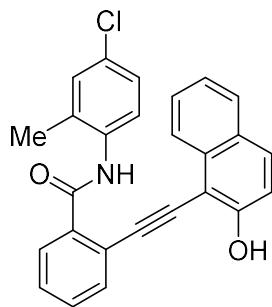

**<sup>1</sup>H NMR** (400 MHz, DMSO-*d*<sub>6</sub>): δ 10.22 (s, 1H), 10.07 (s, 1H), 8.17 (d, *J* = 8.1 Hz, 1H), 7.91 – 7.68 (m, 4H), 7.67 – 7.47 (m, 3H), 7.39 – 7.08 (m, 5H), 2.23 (s, 3H).

**<sup>13</sup>C NMR** (100 MHz, DMSO-*d*<sub>6</sub>): δ 166.6, 158.0, 138.2, 135.2, 135.1, 134.0, 132.6, 130.7, 130.1, 129.9, 129.5, 128.2, 128.2, 128.0, 127.4, 127.2, 127.1, 125.8, 124.5, 123.5, 121.1, 117.8, 102.0, 96.3, 88.7, 19.3.

**IR (KBr, cm<sup>-1</sup>):** 3403, 3249, 1790, 1740, 1434, 1267, 1068, 760, 750.

**HRMS (ESI):** C<sub>26</sub>H<sub>18</sub>ClNO<sub>2</sub>+H, Calc: 412.1104, Found: 412.1099.

### 2-((2-hydroxynaphthalen-1-yl)ethynyl)-N-mesitylbenzamide (1s)

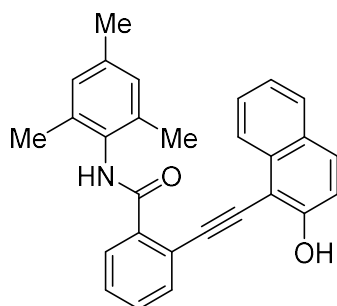

**<sup>1</sup>H NMR** (500 MHz, DMSO-*d*<sub>6</sub>): δ 9.99 (s, 1H), 9.80 (s, 1H), 8.21 (d, *J* = 8.4 Hz, 1H), 7.90 – 7.77 (m, 4H), 7.63 – 7.52 (m, 2H), 7.43 – 7.32 (m, 2H), 7.22 (d, *J* = 8.9 Hz, 1H), 6.93 (s, 2H), 2.24 (s, 3H), 2.17 (s, 6H).

**<sup>13</sup>C NMR** (125 MHz, DMSO-*d*<sub>6</sub>): δ 166.4, 158.1, 138.1, 135.7, 135.3, 133.8, 132.8, 132.2, 130.7, 130.1, 128.3, 128.2, 128.1, 127.9, 127.4, 127.1, 124.7, 123.6, 121.2, 117.7, 102.1, 96.7, 88.3, 20.5, 18.1.

**IR (KBr, cm<sup>-1</sup>):** 3403, 3249, 1745, 1708, 1285, 1197, 1054, 832, 752.

**HRMS (ESI):** C<sub>28</sub>H<sub>23</sub>NO<sub>2</sub>+H, Calc: 406.1821, Found: 406.1802.

### 2-((2-hydroxynaphthalen-1-yl)ethynyl)-N-(naphthalen-2-yl)benzamide (1t)

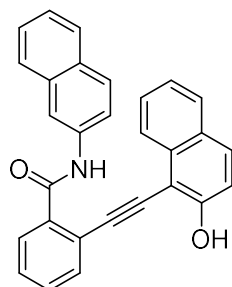

**<sup>1</sup>H NMR** (400 MHz, Acetone-*d*<sub>6</sub>): δ 10.08 (s, 1H), 8.87 (s, 1H), 8.58 (s, 1H), 8.28 (d, *J* = 8.4 Hz, 1H), 7.98 (d, *J* = 7.7 Hz, 1H), 7.94 – 7.86 (m, 5H), 7.86 – 7.77 (m, 2H), 7.66 (t, *J* = 7.6 Hz, 1H),

7.54 (dt,  $J = 20.8, 7.9$  Hz, 2H), 7.44 (q,  $J = 8.3$  Hz, 2H), 7.33 (t,  $J = 7.5$  Hz, 1H), 7.22 (d,  $J = 8.9$  Hz, 1H).

$^{13}\text{C}$  NMR (125 MHz, Acetone- $d_6$ ):  $\delta$  167.8, 159.9, 138.2, 137.6, 134.9, 134.7, 133.6, 132.1, 131.8, 131.8, 129.4, 129.2, 129.2, 129.2, 128.6, 128.6, 128.3, 127.4, 126.0, 125.6, 124.7, 123.0, 121.6, 118.5, 118.0, 103.2, 99.3, 89.3.

IR (KBr,  $\text{cm}^{-1}$ ): 3343, 3211, 1676, 1530, 1437, 1196, 977, 824, 753.

HRMS (ESI):  $\text{C}_{29}\text{H}_{19}\text{NO}_2 + \text{H}$ , Calc: 414.1502, Found: 414.1489.

#### N-benzyl-2-((2-hydroxynaphthalen-1-yl)ethynyl)benzamide (1u)

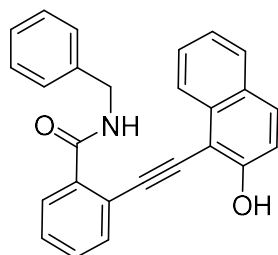

$^1\text{H}$  NMR (500 MHz, DMSO- $d_6$ ):  $\delta$  10.25 (s, 1H), 9.17 (t,  $J = 6.1$  Hz, 1H), 8.26 (s, 1H), 7.92 – 7.83 (m, 2H), 7.78 (d,  $J = 7.6$  Hz, 1H), 7.70 (d,  $J = 7.6$  Hz, 1H), 7.59 – 7.47 (m, 3H), 7.38 (t,  $J = 8.1$  Hz, 3H), 7.26 (d,  $J = 9.0$  Hz, 1H), 7.17 (p,  $J = 6.8$  Hz, 3H), 4.56 (d,  $J = 6.1$  Hz, 2H).

$^{13}\text{C}$  NMR (125 MHz, DMSO- $d_6$ ):  $\delta$  167.5, 158.1, 139.2, 137.8, 133.9, 132.5, 130.8, 130.1, 128.2, 128.2, 128.2, 128.0, 128.0, 127.5, 127.4, 127.2, 126.7, 124.6, 123.6, 120.9, 117.8, 102.1, 96.8, 88.6, 42.8.

IR (KBr,  $\text{cm}^{-1}$ ): 3405, 3229, 1756, 1620, 1434, 1227, 977, 760, 750.

HRMS (ESI):  $\text{C}_{26}\text{H}_{19}\text{NO}_2 + \text{H}$ , Calc: 378.1494, Found: 378.1489.

#### 5-chloro-2-((2-hydroxynaphthalen-1-yl)ethynyl)-N-phenylbenzamide (1v)

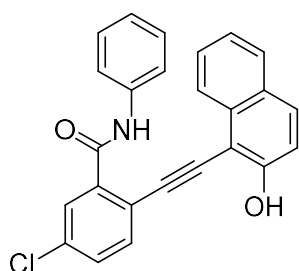

$^1\text{H}$  NMR (400 MHz, DMSO- $d_6$ ):  $\delta$  10.71 (s, 1H), 10.39 (s, 1H), 8.08 (d,  $J = 8.4$  Hz, 1H), 7.91 – 7.73 (m, 6H), 7.66 (d,  $J = 2.4$  Hz, 1H), 7.39 (t,  $J = 7.9$  Hz, 2H), 7.23 (dd,  $J = 8.4, 5.0$  Hz, 2H), 7.14 (t,  $J = 7.4$  Hz, 1H), 7.02 (t,  $J = 7.6$  Hz, 1H).

$^{13}\text{C}$  NMR (125 MHz, DMSO- $d_6$ ):  $\delta$  165.3, 158.1, 140.8, 139.2, 133.9, 133.8, 132.6, 130.9, 129.8, 128.8, 128.1, 127.4, 127.4, 127.0, 124.5, 123.8, 123.4, 120.0, 120.0, 117.8, 101.8, 95.1, 89.4.

IR (KBr,  $\text{cm}^{-1}$ ): 3289, 3164, 1740, 1636, 1588, 1435, 1035, 845, 752.

HRMS (ESI):  $\text{C}_{26}\text{H}_{16}\text{ClNO}_2 + \text{H}$ , Calc: 398.0954, Found: 398.0942

#### 2-((2-hydroxynaphthalen-1-yl)ethynyl)-5-methyl-N-phenylbenzamide (1w)

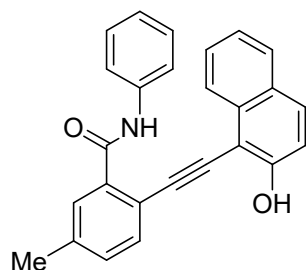

**<sup>1</sup>H NMR** (400 MHz, DMSO-*d*<sub>6</sub>): δ 10.59 (s, 1H), 10.17 (s, 1H), 8.12 (d, *J* = 8.4 Hz, 1H), 7.87 (d, *J* = 8.1 Hz, 2H), 7.78 (t, *J* = 8.9 Hz, 2H), 7.67 (d, *J* = 7.8 Hz, 1H), 7.49 (s, 1H), 7.38 (t, *J* = 7.9 Hz, 3H), 7.23 (dd, *J* = 8.5, 5.0 Hz, 2H), 7.12 (t, *J* = 7.3 Hz, 1H), 7.04 (t, *J* = 7.6 Hz, 1H), 2.42 (s, 3H).

**<sup>13</sup>C NMR** (125 MHz, DMSO-*d*<sub>6</sub>): δ 166.8, 157.8, 139.4, 139.1, 138.1, 133.9, 132.2, 130.5, 130.4, 128.7, 128.0, 127.4, 126.9, 124.6, 123.6, 123.4, 119.7, 118.1, 117.8, 102.3, 96.3, 87.6, 20.9.

**IR (KBr, cm<sup>-1</sup>):** 3378, 3164, 1749, 1620, 1437, 1478, 1029, 833, 754.

**HRMS (ESI):** C<sub>26</sub>H<sub>19</sub>NO<sub>2</sub>+H, Calc: 378.1521, Found: 378.1489.

### 2-((2-hydroxynaphthalen-1-yl)ethynyl)-5-methoxy-N-phenylbenzamide (1x)

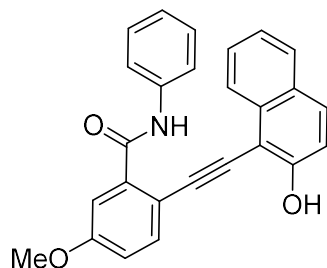

**<sup>1</sup>H NMR** (400 MHz, DMSO-*d*<sub>6</sub>): δ 10.61 (s, 1H), 10.11 (s, 1H), 8.11 (d, *J* = 8.4 Hz, 1H), 7.87 (d, *J* = 8.1 Hz, 2H), 7.81 – 7.67 (m, 3H), 7.38 (t, *J* = 7.9 Hz, 2H), 7.31 – 7.19 (m, 3H), 7.19 – 7.10 (m, 2H), 7.03 (t, *J* = 7.6 Hz, 1H), 3.89 (s, 3H).

**<sup>13</sup>C NMR** (100 MHz, DMSO-*d*<sub>6</sub>): δ 166.4, 158.9, 157.5, 140.7, 139.3, 133.9, 133.8, 130.1, 128.7, 128.0, 127.4, 126.8, 124.6, 123.7, 123.4, 119.7, 117.8, 115.8, 113.0, 113.0, 102.5, 96.2, 86.6, 55.6.

**IR (KBr, cm<sup>-1</sup>):** 3353, 3185, 1648, 1638, 1578, 1202, 1102, 834, 753.

**HRMS (ESI):** C<sub>26</sub>H<sub>19</sub>NO<sub>3</sub>+H, Calc: 394.1432, Found: 394.1438.

### 2-fluoro-6-((2-hydroxynaphthalen-1-yl)ethynyl)-N-phenylbenzamide (1y)

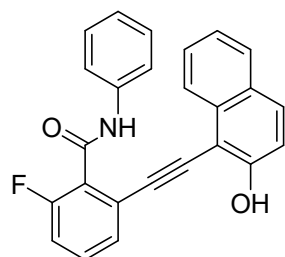

**<sup>1</sup>H NMR** (400 MHz, DMSO-*d*<sub>6</sub>): δ 10.91 (s, 1H), 10.43 (s, 1H), 7.98 (d, *J* = 8.3 Hz, 1H), 7.89 – 7.72 (m, 4H), 7.58 (t, *J* = 4.9 Hz, 2H), 7.45 – 7.34 (m, 3H), 7.21 (dd, *J* = 8.4, 4.3 Hz, 2H), 7.15 (t, *J* = 7.4 Hz, 1H), 6.93 – 6.84 (m, 1H).

**<sup>19</sup>F NMR** (376 MHz, DMSO-*d*<sub>6</sub>): δ -116.36.

$^{13}\text{C}$  NMR (100 MHz, DMSO- $d_6$ ):  $\delta$  162.1, 158.2(d,  $J$  = 246.4 Hz), 158.2, 139.1, 133.9, 131.1, 131.0, 128.9, 128.1, 127.9(d,  $J$  = 3.0 Hz), 127.7, 127.1(d,  $J$  = 27.3 Hz), 124.2, 123.9, 123.4, 123.0(d,  $J$  = 6.1 Hz), 119.4, 117.8, 115.7(d,  $J$  = 21.2 Hz), 101.5, 94.5, 94.5, 89.0.

IR (KBr,  $\text{cm}^{-1}$ ): 3379, 3186, 1753, 1716, 1535, 1196, 1049, 824, 749.

HRMS (ESI):  $\text{C}_{25}\text{H}_{16}\text{FNO}_2+\text{H}$ , Calc: 382.1233, Found: 382.1233.

### 2-((2-hydroxy-7-phenylnaphthalen-1-yl)ethynyl)-N-phenylbenzamide (1z)

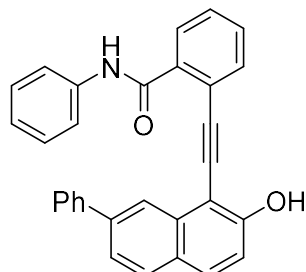

$^1\text{H}$  NMR (400 MHz, DMSO- $d_6$ ):  $\delta$  10.49 (s, 1H), 10.32 (s, 1H), 8.56 (s, 1H), 7.88 (dd,  $J$  = 14.4, 9.2 Hz, 4H), 7.80 (d,  $J$  = 7.6 Hz, 1H), 7.70 (dt,  $J$  = 14.8, 7.0 Hz, 4H), 7.61 (t,  $J$  = 7.0 Hz, 1H), 7.52 (dt,  $J$  = 20.5, 7.5 Hz, 3H), 7.43 (t,  $J$  = 7.2 Hz, 1H), 7.26 (d,  $J$  = 8.8 Hz, 1H), 7.13 (t,  $J$  = 7.9 Hz, 2H), 6.98 (t,  $J$  = 7.3 Hz, 1H).

$^{13}\text{C}$  NMR (100 MHz, DMSO- $d_6$ ):  $\delta$  166.3, 158.6, 140.0, 139.1, 138.5, 134.5, 132.8, 130.4, 130.1, 128.9, 128.8, 128.4, 128.1, 127.8, 127.6, 127.3, 126.7, 123.4, 122.8, 122.0, 121.4, 119.6, 117.8, 102.5, 96.5, 88.3.

IR (KBr,  $\text{cm}^{-1}$ ): 3383, 3253, 1746, 1616, 1513, 1277, 975, 819, 750.

HRMS (ESI):  $\text{C}_{31}\text{H}_{21}\text{NO}_2+\text{H}$ , Calc: 440.1668, Found: 440.1645.

### 2-((2-hydroxy-6-phenylnaphthalen-1-yl)ethynyl)-N-phenylbenzamide (1aa)

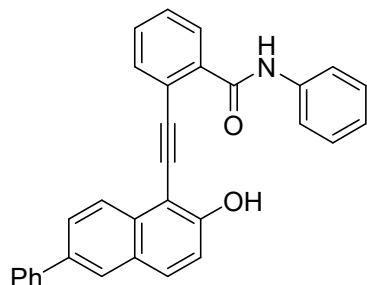

$^1\text{H}$  NMR (400 MHz, DMSO- $d_6$ ):  $\delta$  10.69 (s, 1H), 10.34 (s, 1H), 8.13 (d,  $J$  = 8.7 Hz, 1H), 8.08 (s, 1H), 7.89 (t,  $J$  = 8.4 Hz, 3H), 7.78 (d,  $J$  = 7.0 Hz, 1H), 7.66 (d,  $J$  = 7.6 Hz, 3H), 7.59 (t,  $J$  = 8.4 Hz, 1H), 7.51 (q,  $J$  = 8.8, 7.8 Hz, 3H), 7.39 (dt,  $J$  = 14.4, 7.6 Hz, 3H), 7.25 (d,  $J$  = 8.9 Hz, 1H), 7.21 – 7.11 (m, 2H).

$^{13}\text{C}$  NMR (100 MHz, DMSO- $d_6$ ):  $\delta$  166.9, 158.0, 139.7, 139.5, 139.5, 134.9, 133.1, 132.1, 131.0, 129.8, 129.0, 128.8, 128.2, 127.7, 127.5, 127.3, 126.5, 125.9, 125.5, 125.2, 123.6, 120.8, 119.8, 118.3, 102.0, 96.1, 88.3.

IR (KBr,  $\text{cm}^{-1}$ ): 3382, 3253, 1753, 1584, 1435, 1051, 831, 778, 750.

HRMS (ESI):  $\text{C}_{31}\text{H}_{21}\text{NO}_2+\text{H}$ , Calc: 440.1644, Found: 440.1645.

### 2-((2-hydroxy-7-methylnaphthalen-1-yl)ethynyl)-N-phenylbenzamide (1ab)

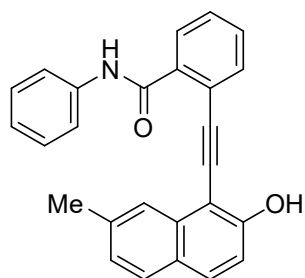

**<sup>1</sup>H NMR** (400 MHz, DMSO-*d*<sub>6</sub>): δ 10.55 (s, 1H), 10.23 (s, 1H), 8.00 (s, 1H), 7.88 – 7.72 (m, 4H), 7.69 (t, *J* = 6.8 Hz, 2H), 7.56 (dq, *J* = 15.2, 7.6 Hz, 2H), 7.31 (t, *J* = 7.8 Hz, 2H), 7.13 (t, *J* = 7.4 Hz, 2H), 7.07 (t, *J* = 7.5 Hz, 1H), 2.27 (s, 3H).

**<sup>13</sup>C NMR** (100 MHz, DMSO-*d*<sub>6</sub>): δ 166.6, 158.1, 139.2, 138.8, 136.9, 134.2, 132.5, 130.4, 130.0, 128.7, 128.6, 128.1, 127.9, 127.8, 125.6, 125.6, 123.7, 123.6, 121.2, 119.8, 116.7, 101.6, 96.0, 88.6, 21.1.

**IR (KBr, cm<sup>-1</sup>):** 3374, 3188, 1754, 1608, 1328, 1283, 1055, 809, 751.

**HRMS (ESI):** C<sub>26</sub>H<sub>19</sub>NO<sub>2</sub>+H, Calc: 378.1499, Found: 378.1489.

### <sup>1</sup>H NMR and enantioselectivities studies

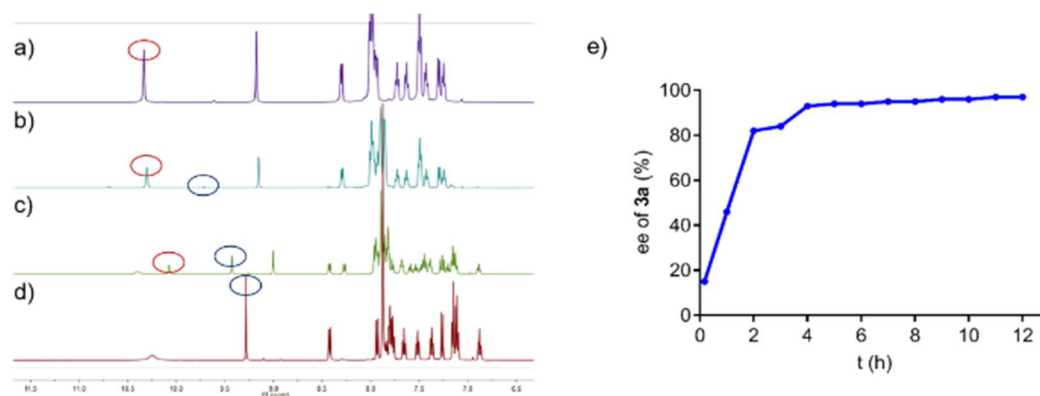

**Figure S1.** <sup>1</sup>H NMR and enantioselectivities studies. a) <sup>1</sup>H NMR spectrum of **1a** at -50 °C. b) <sup>1</sup>H NMR spectrum of **1a** treated by NIP (1.0 equiv) at -50 °C after 5min. c) <sup>1</sup>H NMR spectrum of **1a** treated by NIP (1.0 equiv) from -50 °C to -20 °C after 15 min. d) <sup>1</sup>H NMR spectrum of **1a** treated by NIP (1.0 equiv) from -50 °C to 0 °C after 25 min. e) ee of **3a** measured at different times.

To our surprise, the reaction proceeded very quickly, for which 100% conversion was monitored by thin-layer chromatography (TLC) within minutes. However, enantioselectivities showed a poor repeatability in different times under the same reaction conditions. When the reaction time was extended to overnight, enantioselectivities could remain consistent with 77% ee (Table 1, entry 1). Due to the fast reaction progress and the inconsistent operation, it was difficult to maintain the repeatability of enantioselectivities. We speculated that the conversion of the reaction was incomplete at -78 °C, while the complete conversion occurs quickly in the sampling capillary during the TLC monitoring. This conjecture had also been confirmed by NMR experiments (see Supporting Information for details).



In order to investigate the rapid conversion of *o*-alkynylbenzamides during the TLC monitoring within minutes, <sup>1</sup>H NMR experiment was carried out. As shown in Figure 2, the characteristic peaks of the product **3a** was observed by <sup>1</sup>H NMR spectrum after **1a** treated by NIP at -50 °C for 5 min (Figure 2b). During this process, the reaction achieved 10% conversion. While 50% conversion was carried out after **1a** treated by NIP for 15 minutes during the temperature rising from -50 °C to -20 °C (Figure 2c). And complete conversion could be observed after **1a** treated by NIP for 25 minutes during the temperature rising from -50 °C to 0 °C (Figure 2d). Therefore, 100% conversion could be easily achieved when the reaction temperature rose rapidly from -78 °C to room temperature in minutes during the TLC monitoring. Furthermore, to prove that the complete conversion of reaction needed more time at -78 °C, ee of **3a** was dynamically monitored and shown in Figure 2e. We also tested the stability of the **3a** at 75 °C for 12 h, and there was no racemization. As a result, the low enantioselectivity before the complete conversion of reaction can be considered to be the absence of the catalyst or weakened chiral control during the rise of temperature.

### General procedure and spectral data for the synthesis of **3**

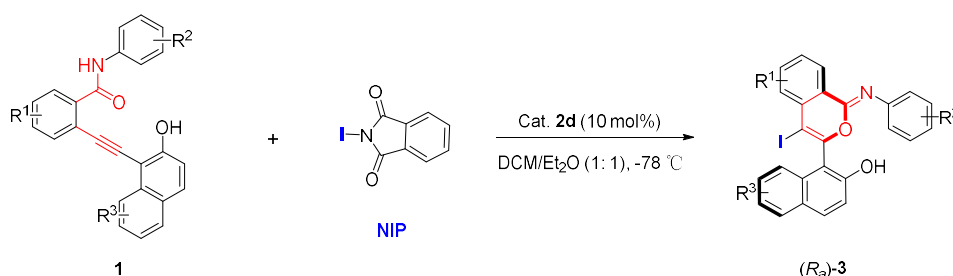

To a solution of **1** (0.05 mmol) in DCM: Et<sub>2</sub>O (1:1 vol/vol, 1 mL) was added catalyst **2d** (10 mol%) at -78 °C. Then, NIP (1.1 equiv, 0.055 mmol) dissolved in DCM: Et<sub>2</sub>O (1:1 vol/vol, 1 mL) was added slowly. After the reaction performed completely, the solvent was removed under vacuum and residue was purified by flash column chromatography (petroleum ether/DCM 1:10) to give the pure desired products (*R<sub>a</sub>*)-**3**.

### 1.0 mmol scale for the synthesis of **3a**

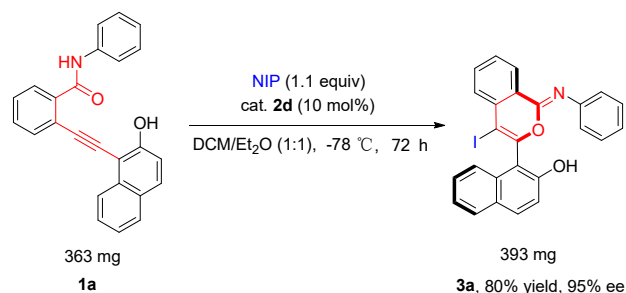

To a solution of **1** (363mg, 1.0 mmol) in DCM: Et<sub>2</sub>O (1:1 vol/vol, 20 mL) was added catalyst **2d** (65 mg, 10 mol%) at -78 °C. Then, NIP (247 mg, 1.1 mmol) dissolved in DCM: Et<sub>2</sub>O (1:1 vol/vol, 20 mL) was added slowly. Then the reaction mixture was stirred at -78 °C. After the reaction performed completely, the solvent was removed under vacuum and residue was purified by flash column chromatography (petroleum ether/DCM 1:10) to give the pure desired products (*R<sub>a</sub>*)-**3a** as a white solid.

### Spectral data for (1*H*)-isochromen-1-imines **3**

#### (*R<sub>a</sub>*)-1-(4-iodo-1-(phenylimino)-1*H*-isochromen-3-yl)naphthalen-2-ol (**3a**)

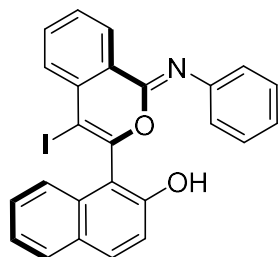

**Appearance:** white solid.

**Yield:** 99%, 24.3 mg

**<sup>1</sup>H NMR** (400 MHz, Acetone-*d*<sub>6</sub>): δ 9.13 (s, 1H), 8.42 (d, *J* = 7.1 Hz, 1H), 7.91 (d, *J* = 9.0 Hz, 1H), 7.85 (d, *J* = 8.2 Hz, 1H), 7.78 (q, *J* = 7.5, 7.0 Hz, 3H), 7.63 (t, *J* = 8.3 Hz, 1H), 7.54 – 7.45 (m, 1H), 7.35 (t, *J* = 7.0 Hz, 1H), 7.26 (d, *J* = 8.9 Hz, 1H), 7.19 – 7.04 (m, 4H), 6.95 – 6.82 (m, 1H).

**<sup>13</sup>C NMR** (125 MHz, Acetone-*d*<sub>6</sub>): δ 154.4, 151.8, 149.9, 147.1, 135.6, 134.1, 133.4, 132.8, 131.5, 130.4, 129.3, 129.3, 129.2, 128.3, 125.2, 124.5, 124.5, 124.4, 123.7, 119.4, 117.1, 82.7.

**HRMS (ESI):** C<sub>25</sub>H<sub>16</sub>INO<sub>2</sub>+H, Calc: 490.0290, Found: 490.0299.

**Optical Rotation:** [α]<sub>D</sub><sup>20</sup> = +28° (*c* = 1, acetone).

**IR (KBr, cm<sup>-1</sup>):** 3085, 1643, 1588, 1488, 1434, 1274, 1039, 939, 817, 744.

**HPLC analysis:** Chiralcel IC-H (Hexane/*i*-PrOH = 95:5, flow rate = 1.0 mL/min, *t<sub>R</sub>* = 5.473 min (minor), *t<sub>R</sub>* = 7.767 min (major).

#### (*R<sub>a</sub>*)-1-(4-iodo-1-(*o*-tolylimino)-1*H*-isochromen-3-yl)naphthalen-2-ol (**3b**)

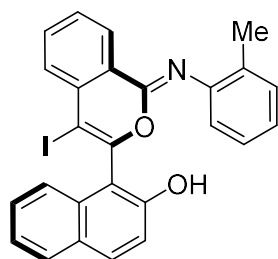

**Appearance:** white solid.

**Yield:** 99%, 24.9 mg

**<sup>1</sup>H NMR** (400 MHz, Acetone-*d*<sub>6</sub>): δ 9.09 (s, 1H), 8.47 (d, *J* = 7.9 Hz, 1H), 7.90 – 7.69 (m, 5H), 7.66 – 7.60 (m, 1H), 7.54 – 7.44 (m, 1H), 7.38 – 7.31 (m, 1H), 7.22 (d, *J* = 8.9 Hz, 1H), 7.02 (d, *J* = 8.1 Hz, 2H), 6.88 (t, *J* = 7.7 Hz, 1H), 6.75 (t, *J* = 8.1 Hz, 1H), 2.21 (s, 3H).

**<sup>13</sup>C NMR** (100 MHz, Acetone-*d*<sub>6</sub>): δ 154.3, 152.0, 149.4, 146.1, 135.5, 134.1, 133.4, 132.7, 131.4, 130.8, 130.6, 130.4, 129.2, 129.1, 128.4, 128.2, 126.7, 125.0, 124.4, 124.4, 124.1, 121.8, 119.3, 117.2, 82.5, 18.4.

**HRMS (ESI):** C<sub>26</sub>H<sub>18</sub>INO<sub>2</sub>+H, Calc: 504.0448, Found: 504.0455.

**Optical Rotation:** [α]<sub>D</sub><sup>20</sup> = +127° (*c* = 1, acetone).

**IR (KBr, cm<sup>-1</sup>):** 2923, 1721, 1652, 1579, 1434, 1275, 1115, 1038, 819.

**HPLC analysis:** Chiralcel IC-H (Hexane/*i*-PrOH = 95:5, flow rate = 1.0 mL/min, *t<sub>R</sub>* = 4.890 min (minor), *t<sub>R</sub>* = 7.613 min (major).

**(*R<sub>a</sub>*)-1-(1-((2-ethoxyphenyl)imino)-4-iodo-1*H*-isochromen-3-yl)naphthalen-2-ol (3c)**

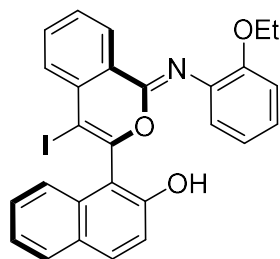

**Appearance:** white solid.

**Yield:** 89%, 23.7 mg

**<sup>1</sup>H NMR** (400 MHz, Acetone-*d*<sub>6</sub>): δ 9.05 (s, 1H), 8.44 (d, *J* = 7.9 Hz, 1H), 7.91 – 7.69 (m, 5H), 7.62 (t, *J* = 6.4 Hz, 1H), 7.55 – 7.45 (m, 1H), 7.34 (t, *J* = 7.5 Hz, 1H), 7.20 (d, *J* = 8.9 Hz, 1H), 6.96 (d, *J* = 9.3 Hz, 1H), 6.77 (d, *J* = 8.3 Hz, 2H), 6.70 – 6.63 (m, 1H), 3.94 (d, *J* = 6.8, 2.8 Hz, 2H), 1.30 (t, *J* = 7.0 Hz, 3H).

**<sup>13</sup>C NMR** (125 MHz, Acetone-*d*<sub>6</sub>): δ 154.3, 152.1, 151.2, 150.2, 137.4, 135.5, 134.0, 133.5, 132.6, 131.4, 130.3, 129.2, 129.1, 128.5, 128.0, 124.9, 124.8, 124.5, 124.3, 123.0, 121.3, 119.3, 117.3, 114.0, 82.4, 64.7, 15.4.

**HRMS (ESI):** C<sub>27</sub>H<sub>20</sub>IN<sub>3</sub>+H, Calc: 534.0556, Found: 534.0561.

**Optical Rotation:** [α]<sub>D</sub><sup>20</sup> = +54° (*c* = 1, acetone).

**IR (KBr, cm<sup>-1</sup>):** 2968, 1646, 1588, 1435, 1271, 1189, 1044, 970, 816.

**HPLC analysis:** Chiralcel IC-H (Hexane/*i*-PrOH = 95:5, flow rate = 1.0 mL/min, *t<sub>R</sub>* = 9.053 min (minor), *t<sub>R</sub>* = 18.433 min (major).

**(*R<sub>a</sub>*)-1-(1-((2-fluorophenyl)imino)-4-iodo-1*H*-isochromen-3-yl)naphthalen-2-ol (3d)**

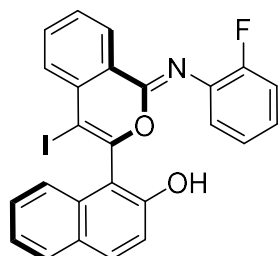

**Appearance:** yellow solid.

**Yield:** 90%, 22.9 mg

**<sup>1</sup>H NMR** (400 MHz, Acetone-*d*<sub>6</sub>): δ 9.14 (s, 1H), 8.45 (d, *J* = 7.7 Hz, 1H), 7.94 – 7.75 (m, 4H), 7.72 (d, *J* = 8.4 Hz, 1H), 7.65 (t, *J* = 8.3 Hz, 1H), 7.49 (t, *J* = 7.6 Hz, 1H), 7.34 (t, *J* = 7.5 Hz, 1H), 7.23 (d, *J* = 8.9 Hz, 1H), 7.20 – 7.09 (m, 1H), 6.98 – 6.77 (m, 3H).

**<sup>13</sup>C NMR** (125 MHz, Acetone-*d*<sub>6</sub>): δ 156.3, 154.4(d, *J* = 325.0 Hz), 151.8, 135.7, 135.4(d, *J* = 12.6 Hz), 134.5, 133.4, 132.8, 131.6, 130.5, 129.2, 129.1, 128.4(d, *J* = 39.1 Hz), 125.3(d, *J* = 7.6 Hz), 124.9(d, *J* = 6.3 Hz), 124.8, 124.5, 124.4, 124.4, 119.3, 116.9, 116.4, 116.3, 83.0.

**<sup>19</sup>F NMR** (376 MHz, Acetone-*d*<sub>6</sub>): δ -124.53.

**HRMS (ESI):** C<sub>25</sub>H<sub>15</sub>FIN<sub>2</sub>+H, Calc: 508.0143, Found: 508.0224.

**Optical Rotation:** [α]<sub>D</sub><sup>20</sup> = +31° (*c* = 1, acetone).

**IR (KBr, cm<sup>-1</sup>):** 3194, 1725, 1605, 1604, 1308, 1242, 1031, 838, 819.

**HPLC analysis:** Chiralcel IC-H (Hexane/*i*-PrOH = 95:5, flow rate = 1.0 mL/min,  $t_R$  = 5.570 min (minor),  $t_R$  = 9.383 min (major).

**(*R<sub>a</sub>*)-1-(1-((2-chlorophenyl)imino)-4-iodo-1*H*-isochromen-3-yl)naphthalen-2-ol (3e)**

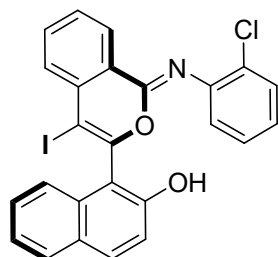

**Appearance:** white solid.

**Yield:** 84%, 22.0 mg

**<sup>1</sup>H NMR** (400 MHz, Acetone-*d*<sub>6</sub>): δ 9.15 (s, 1H), 8.48 (d,  $J$  = 7.8 Hz, 1H), 7.89 – 7.71 (m, 5H), 7.65 (t,  $J$  = 8.2 Hz, 1H), 7.48 (t,  $J$  = 7.5 Hz, 1H), 7.33 (t,  $J$  = 7.5 Hz, 1H), 7.23 (t,  $J$  = 8.2 Hz, 2H), 7.16 (d,  $J$  = 9.4 Hz, 1H), 7.01 (t,  $J$  = 7.3 Hz, 1H), 6.83 (t,  $J$  = 7.7 Hz, 1H).

**<sup>13</sup>C NMR** (125 MHz, Acetone-*d*<sub>6</sub>): δ 154.4, 151.8, 151.3, 145.0, 135.7, 134.6, 133.4, 132.8, 131.5, 130.5, 130.2, 129.2, 129.1, 128.6, 128.2, 127.9, 127.1, 125.2, 124.5, 124.4, 124.3, 123.8, 119.2, 116.8, 83.0.

**HRMS (ESI):** C<sub>25</sub>H<sub>15</sub>ClINO<sub>2</sub>+H, Calc: 523.9915, Found: 523.9909

**Optical Rotation:**  $[\alpha]_D^{20}$  = +27° ( $c$  = 1, acetone).

**IR (KBr, cm<sup>-1</sup>):** 2969, 1648, 1578, 1435, 1350, 1276, 1189, 939, 818.

**HPLC analysis:** Chiralcel IC-H (Hexane/*i*-PrOH = 95:5, flow rate = 1.0 mL/min,  $t_R$  = 5.270 min (minor),  $t_R$  = 8.067 min (major).

**(*R<sub>a</sub>*)-1-(4-iodo-1-(*m*-tolylimino)-1*H*-isochromen-3-yl)naphthalen-2-ol (3f)**

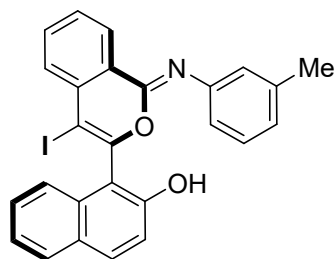

**Appearance:** white solid.

**Yield:** 88%, 22.2 mg

**<sup>1</sup>H NMR** (400 MHz, DMSO-*d*<sub>6</sub>): δ 10.26 (s, 1H), 8.32 (d,  $J$  = 7.8 Hz, 1H), 7.92 – 7.75 (m, 3H), 7.72 – 7.59 (m, 3H), 7.48 (t,  $J$  = 7.6 Hz, 1H), 7.38 – 7.28 (m, 1H), 7.24 (d,  $J$  = 8.9 Hz, 1H), 7.04 – 6.89 (m, 2H), 6.85 (d,  $J$  = 7.8 Hz, 1H), 6.69 (d,  $J$  = 7.6 Hz, 1H), 2.03 (s, 3H).

**<sup>13</sup>C NMR** (125 MHz, DMSO-*d*<sub>6</sub>): δ 153.6, 150.6, 149.0, 145.6, 137.5, 134.3, 133.5, 132.0, 131.5, 130.2, 129.5, 128.3, 128.1, 127.4, 127.2, 126.9, 124.2, 123.3, 123.1, 123.1, 119.5, 118.3, 115.4, 82.0, 20.8.

**HRMS (ESI):** C<sub>26</sub>H<sub>18</sub>INO<sub>2</sub>+H, Calc: 504.0468, Found: 504.0455

**Optical Rotation:**  $[\alpha]_D^{20}$  = +37° ( $c$  = 1, acetone).

**IR (KBr, cm<sup>-1</sup>):** 2922, 1646, 1595, 1434, 1275, 1123, 1041, 968, 819.

**HPLC analysis:** Chiralcel IC-H (Hexane/*i*-PrOH = 95:5, flow rate = 1.0 mL/min,  $t_R$  = 5.490 min (minor),  $t_R$  = 7.663 min (major).

**(*R<sub>a</sub>*)-1-(4-iodo-1-((3-(methylthio)phenyl)imino)-1*H*-isochromen-3-yl)naphthalen-2-ol (3g)**

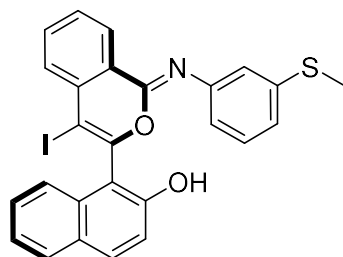

**Appearance:** white solid.

**Yield:** 85%, 22.7 mg

**<sup>1</sup>H NMR** (400 MHz, Acetone-*d*<sub>6</sub>): δ 9.13 (s, 1H), 8.42 (d, *J* = 7.8 Hz, 1H), 7.93 (d, *J* = 8.9 Hz, 1H), 7.87 (d, *J* = 8.2 Hz, 1H), 7.82 – 7.74 (m, 3H), 7.64 (t, *J* = 8.3 Hz, 1H), 7.50 (t, *J* = 6.9 Hz, 1H), 7.36 (t, *J* = 7.5 Hz, 1H), 7.26 (d, *J* = 8.9 Hz, 1H), 7.11 (s, 1H), 7.05 (t, *J* = 7.9 Hz, 1H), 6.91 (d, *J* = 7.9 Hz, 1H), 6.78 (d, *J* = 10.6 Hz, 1H), 2.06 (d, *J* = 5.4 Hz, 3H).

**<sup>13</sup>C NMR** (100 MHz, Acetone-*d*<sub>6</sub>): δ 154.4, 151.7, 150.3, 147.5, 139.6, 135.6, 134.2, 133.4, 132.8, 131.5, 130.5, 129.6, 129.3, 129.2, 128.4, 128.3, 125.1, 124.5, 122.8, 121.1, 120.7, 119.4, 117.1, 82.8, 15.5.

**HRMS (ESI):** C<sub>26</sub>H<sub>18</sub>INO<sub>2</sub>S+H, Calc: 536.3983, Found: 536.3960

**Optical Rotation:**  $[\alpha]_D^{20}$  = +33° (*c* = 1, acetone).

**IR (KBr, cm<sup>-1</sup>):** 2922, 1721, 1650, 1578, 1468, 1275, 1116, 1039, 818.

**HPLC analysis:** Chiralcel IC-H (Hexane/*i*-PrOH = 95:5, flow rate = 1.0 mL/min,  $t_R$  = 6.973 min (minor),  $t_R$  = 9.213 min (major).

**(*R<sub>a</sub>*)-1-(1-((3-bromophenyl)imino)-4-iodo-1*H*-isochromen-3-yl)naphthalen-2-ol (3h)**

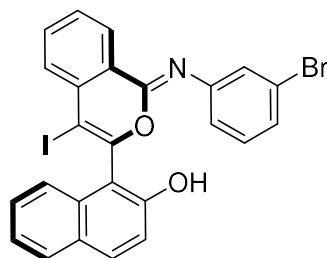

**Appearance:** white solid.

**Yield:** 97%, 27.5 mg

**<sup>1</sup>H NMR** (400 MHz, Acetone-*d*<sub>6</sub>): δ 9.15 (s, 1H), 8.41 (d, *J* = 9.2 Hz, 1H), 7.92 (d, *J* = 8.9 Hz, 1H), 7.87 – 7.75 (m, 4H), 7.65 (t, *J* = 7.4 Hz, 1H), 7.55 – 7.48 (m, 1H), 7.40 – 7.32 (m, 2H), 7.27 (d, *J* = 8.9 Hz, 1H), 7.14 – 7.08 (m, 1H), 7.08 – 6.98 (m, 2H).

**<sup>13</sup>C NMR** (100 MHz, Acetone-*d*<sub>6</sub>): δ 154.5, 151.7, 151.2, 148.9, 135.7, 134.5, 133.4, 132.9, 131.6, 131.0, 130.5, 129.3, 129.2, 128.4, 128.4, 127.2, 126.5, 124.7, 124.5, 124.4, 122.7, 122.6, 119.3, 116.8, 82.9.

**HRMS (ESI):** C<sub>25</sub>H<sub>15</sub>BrINO<sub>2</sub>+H, Calc: 567.9405, Found: 567.9404.

**Optical Rotation:**  $[\alpha]_D^{20}$  = +107° (*c* = 1, acetone).

**IR (KBr,  $\text{cm}^{-1}$ ):** 2924, 1718, 1645, 1584, 1467, 1144, 1067, 860, 818.

**HPLC analysis:** Chiralcel IC-H (Hexane/*i*-PrOH = 95:5, flow rate = 1.0 mL/min,  $t_R$  = 4.833 min (minor),  $t_R$  = 6.297 min (major).

**(*R<sub>a</sub>*)-1-(1-((3-chlorophenyl)imino)-4-iodo-1*H*-isochromen-3-yl)naphthalen-2-ol (3i)**

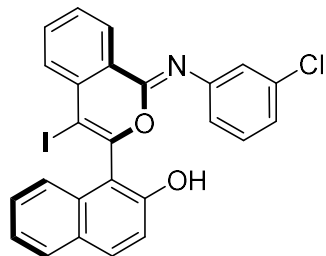

**Appearance:** white solid.

**Yield:** 80%, 20.9 mg

**$^1\text{H NMR}$**  (400 MHz, Acetone- $d_6$ ):  $\delta$  9.17 (s, 1H), 8.41 (d,  $J$  = 7.3 Hz, 1H), 7.92 (d,  $J$  = 9.0 Hz, 1H), 7.88 – 7.74 (m, 4H), 7.67 – 7.61 (m, 1H), 7.51 (d,  $J$  = 8.6 Hz, 1H), 7.36 (t,  $J$  = 6.9 Hz, 1H), 7.28 (d,  $J$  = 8.9 Hz, 1H), 7.22 (t,  $J$  = 2.1 Hz, 1H), 7.15 – 7.05 (m, 2H), 6.89 (dt,  $J$  = 7.3, 2.0 Hz, 1H).

**$^{13}\text{C NMR}$**  (125 MHz, Acetone- $d_6$ ):  $\delta$  154.4, 151.7, 151.2, 148.7, 135.7, 134.4, 134.4, 133.4, 132.9, 131.5, 130.7, 130.5, 129.2, 129.2, 128.4, 128.3, 124.7, 124.5, 124.4, 124.2, 123.6, 122.2, 119.3, 116.8.

**HRMS (ESI):**  $\text{C}_{25}\text{H}_{15}\text{ClINO}_2 + \text{H}$ , Calc: 524.0130, Found: 523.9909

**Optical Rotation:**  $[\alpha]_{\text{D}}^{20} = +46^\circ$  ( $c$  = 1, acetone).

**IR (KBr,  $\text{cm}^{-1}$ ):** 3061, 1645, 1488, 1278, 1189, 1091, 1041, 968, 818.

**HPLC analysis:** Chiralcel IC-H (Hexane/*i*-PrOH = 95:5, flow rate = 1.0 mL/min,  $t_R$  = 4.553 min (minor),  $t_R$  = 6.370 min (major).

**(*R<sub>a</sub>*)-1-(1-((3-ethylphenyl)imino)-4-iodo-1*H*-isochromen-3-yl)naphthalen-2-ol (3j)**

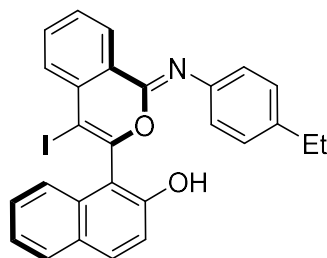

**Appearance:** white solid.

**Yield:** 83%, 21.5 mg

**$^1\text{H NMR}$**  (400 MHz, Acetone- $d_6$ ):  $\delta$  9.11 (s, 1H), 8.41 (d,  $J$  = 7.9 Hz, 1H), 7.93 (d,  $J$  = 9.0 Hz, 1H), 7.87 (d,  $J$  = 8.2 Hz, 1H), 7.81 – 7.72 (m, 3H), 7.62 (t,  $J$  = 7.3 Hz, 1H), 7.50 (t,  $J$  = 7.6 Hz, 1H), 7.36 (t,  $J$  = 8.1 Hz, 1H), 7.27 (d,  $J$  = 9.0 Hz, 1H), 7.11 (d,  $J$  = 8.3 Hz, 2H), 6.94 (d,  $J$  = 8.3 Hz, 2H), 2.45 (q,  $J$  = 7.6 Hz, 2H), 1.07 (t,  $J$  = 7.6 Hz, 3H).

**$^{13}\text{C NMR}$**  (100 MHz, Acetone- $d_6$ ):  $\delta$  154.4, 151.8, 149.4, 144.4, 140.5, 135.5, 133.9, 133.5, 132.8, 131.4, 130.4, 129.3, 129.2, 128.7, 128.3, 128.2, 125.4, 124.5, 124.4, 124.0, 119.4, 117.2, 82.7, 28.8, 16.0.

**HRMS (ESI):**  $\text{C}_{27}\text{H}_{20}\text{INO}_2 + \text{H}$ , Calc: 518.0561, Found: 518.0612.

**Optical Rotation:**  $[\alpha]_{\text{D}}^{20} = +63^{\circ}$  ( $c = 1$ , acetone).

**IR (KBr,  $\text{cm}^{-1}$ ):** 2963, 1650, 1592, 1435, 1278, 1190, 1041, 939, 816.

**HPLC analysis:** Chiralcel IC-H (Hexane/*i*-PrOH = 95:5, flow rate = 1.0 mL/min,  $t_{\text{R}} = 5.773$  min (minor),  $t_{\text{R}} = 8.067$  min (major).

**(*R*<sub>a</sub>)-1-(1-((4-(benzyloxy)phenyl)imino)-4-iodo-1*H*-isochromen-3-yl)naphthalen-2-ol (3k)**

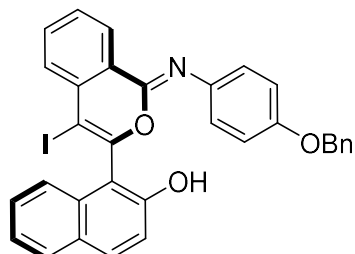

**Appearance:** white solid.

**Yield:** 82%, 24.4 mg

**<sup>1</sup>H NMR** (400 MHz, DMSO-*d*<sub>6</sub>):  $\delta$  9.82 (s, 1H), 7.89 (d,  $J = 7.7$  Hz, 1H), 7.45 (d,  $J = 9.0$  Hz, 1H), 7.41 – 7.33 (m, 2H), 7.21 (td,  $J = 16.1, 14.5, 7.6$  Hz, 3H), 7.01 (t,  $J = 7.6$  Hz, 1H), 6.93 – 6.75 (m, 7H), 6.59 (t,  $J = 8.1$  Hz, 1H), 6.37 (s, 1H), 6.23 (d,  $J = 7.7$  Hz, 1H), 6.08 (d,  $J = 11.0$  Hz, 1H), 4.42 – 4.08 (m, 2H).

**<sup>13</sup>C NMR** (100 MHz, DMSO-*d*<sub>6</sub>):  $\delta$  158.4, 153.6, 150.6, 149.2, 146.8, 136.9, 134.3, 133.6, 132.0, 131.6, 130.2, 129.5, 129.2, 128.3, 128.1, 127.7, 127.6, 127.4, 127.4, 127.0, 123.3, 123.2, 123.2, 118.4, 115.7, 115.4, 110.9, 108.2, 82.3, 68.8.

**HRMS (ESI):** C<sub>32</sub>H<sub>22</sub>INO<sub>3</sub>+H, Calc: 596.0637, Found: 596.0717

**Optical Rotation:**  $[\alpha]_{\text{D}}^{20} = +50^{\circ}$  ( $c = 1$ , acetone).

**IR (KBr,  $\text{cm}^{-1}$ ):** 2924, 1646, 1583, 1489, 1454, 1261, 1039, 936, 819.

**HPLC analysis:** Chiralcel IC-H (Hexane/*i*-PrOH = 95:5, flow rate = 1.0 mL/min,  $t_{\text{R}} = 8.277$  min (minor),  $t_{\text{R}} = 12.703$  min (major).

**(*R*<sub>a</sub>)-1-(1-((4-fluorophenyl)imino)-4-iodo-1*H*-isochromen-3-yl)naphthalen-2-ol (3l)**

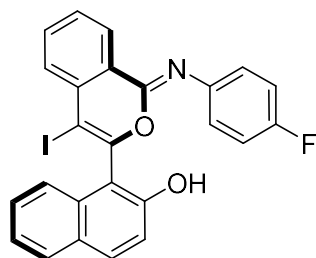

**Appearance:** white solid.

**Yield:** 83%, 21.0 mg

**<sup>1</sup>H NMR** (400 MHz, Acetone-*d*<sub>6</sub>):  $\delta$  9.14 (s, 1H), 8.41 (d,  $J = 7.5$  Hz, 1H), 7.93 (d,  $J = 9.0$  Hz, 1H), 7.81 – 7.73 (m, 3H), 7.66 – 7.60 (m, 1H), 7.52 – 7.46 (m, 1H), 7.36 (t,  $J = 7.5$  Hz, 1H), 7.27 (d,  $J = 8.9$  Hz, 1H), 7.21 (dd,  $J = 9.0, 5.1$  Hz, 2H), 6.86 (t,  $J = 8.9$  Hz, 2H).

**<sup>13</sup>C NMR** (125 MHz, Acetone-*d*<sub>6</sub>):  $\delta$  160.0(d,  $J = 242.0$  Hz), 154.4, 151.7, 150.2, 143.2, 135.5, 134.2, 133.4, 132.8, 131.5, 130.4, 129.3, 129.2, 128.3(d,  $J = 11.3$  Hz), 125.5(d,  $J = 7.56$  Hz), 125.1, 124.5(d,  $J = 10.1$  Hz), 119.4, 117.0, 115.9, 115.7, 82.8.

$^{19}\text{F}$  NMR (376 MHz, Acetone- $d_6$ ):  $\delta$  -120.99.

**HRMS (ESI):**  $\text{C}_{25}\text{H}_{15}\text{FINO}_2+\text{H}$ , Calc: 508.0156, Found: 508.0204.

**Optical Rotation:**  $[\alpha]_{\text{D}}^{20} = +42^\circ$  ( $c = 1$ , acetone).

**IR (KBr,  $\text{cm}^{-1}$ ):** 3122, 1646, 1502, 1434, 1276, 1191, 1073, 843, 816.

**HPLC analysis:** Chiralcel IC-H (Hexane/*i*-PrOH = 95:5, flow rate = 1.0 mL/min,  $t_{\text{R}} = 4.520$  min (minor),  $t_{\text{R}} = 6.117$  min (major).

**(*R*<sub>a</sub>)-1-(1-((4-chlorophenyl)imino)-4-iodo-1*H*-isochromen-3-yl)naphthalen-2-ol (3m)**

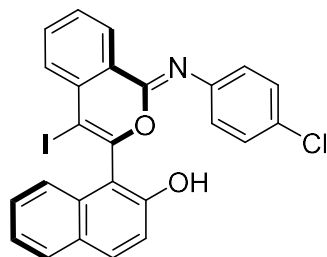

**Appearance:** white solid.

**Yield:** 87%, 22.8 mg

$^1\text{H}$  NMR (400 MHz, Acetone- $d_6$ ):  $\delta$  9.15 (s, 1H), 8.41 (d,  $J = 7.3$  Hz, 1H), 7.92 (d,  $J = 8.9$  Hz, 1H), 7.86 (d,  $J = 8.1$  Hz, 1H), 7.82 – 7.73 (m, 3H), 7.62 (t,  $J = 6.1$  Hz, 1H), 7.49 (t,  $J = 6.9$  Hz, 1H), 7.39 – 7.32 (m, 1H), 7.27 (d,  $J = 8.9$  Hz, 1H), 7.19 – 7.09 (m, 4H).

$^{13}\text{C}$  NMR (125 MHz, Acetone- $d_6$ ):  $\delta$  154.4, 151.7, 150.8, 145.9, 135.6, 134.3, 133.4, 132.9, 131.5, 130.4, 129.3, 129.2, 129.2, 129.0, 128.3, 125.4, 124.8, 124.5, 124.4, 119.3, 116.9, 82.9.

**HRMS (ESI):**  $\text{C}_{25}\text{H}_{15}\text{ClINO}_2+\text{H}$ , Calc: 524.0082, Found: 523.9909.

**Optical Rotation:**  $[\alpha]_{\text{D}}^{20} = +122^\circ$  ( $c = 1$ , acetone).

**IR (KBr,  $\text{cm}^{-1}$ ):** 3022, 1640, 1589, 1486, 1317, 1206, 1073, 819, 755.

**HPLC analysis:** Chiralcel IC-H (Hexane/*i*-PrOH = 95:5, flow rate = 1.0 mL/min,  $t_{\text{R}} = 4.493$  min (minor),  $t_{\text{R}} = 6.220$  min (major).

**(*R*<sub>a</sub>)-1-(4-iodo-1-((4-iodophenyl)imino)-1*H*-isochromen-3-yl)naphthalen-2-ol (3n)**

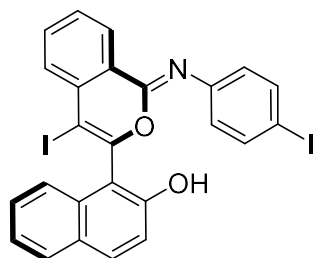

**Appearance:** white solid.

**Yield:** 83%, 25.5 mg

$^1\text{H}$  NMR (400 MHz, DMSO- $d_6$ ):  $\delta$  10.22 (s, 1H), 8.33 (d,  $J = 7.9$  Hz, 1H), 7.94 – 7.78 (m, 3H), 7.70 (d,  $J = 7.8$  Hz, 1H), 7.66 – 7.59 (m, 2H), 7.44 (dd,  $J = 14.4, 7.6$  Hz, 3H), 7.33 (t,  $J = 7.5$  Hz, 1H), 7.23 (d,  $J = 9.0$  Hz, 1H), 6.89 (d,  $J = 8.6$  Hz, 2H).

$^{13}\text{C}$  NMR (125 MHz, DMSO- $d_6$ ):  $\delta$  153.7, 150.5, 149.8, 145.6, 137.2, 134.4, 133.8, 132.0, 131.6, 130.3, 129.6, 128.2, 127.4, 127.3, 127.1, 125.0, 123.3, 123.2, 123.1, 118.4, 115.3, 87.6, 82.5.

**HRMS (ESI):**  $\text{C}_{25}\text{H}_{15}\text{I}_2\text{NO}_2+\text{H}$ , Calc: 615.9543, Found: 615.9265.



**Optical Rotation:**  $[\alpha]_{\text{D}}^{20} = +54^{\circ}$  ( $c = 1$ , acetone).

**IR (KBr,  $\text{cm}^{-1}$ ):** 2921, 1603, 1575, 1285, 1186, 1045, 1002, 843, 813.

**HPLC analysis:** Chiralcel IC-H (Hexane/*i*-PrOH = 95:5, flow rate = 1.0 mL/min,  $t_{\text{R}} = 4.817$  min (minor),  $t_{\text{R}} = 6.903$  min (major).

**(*R*<sub>a</sub>)-1-(1-((2,3-dimethylphenyl)imino)-4-iodo-1*H*-isochromen-3-yl)naphthalen-2-ol (3o)**

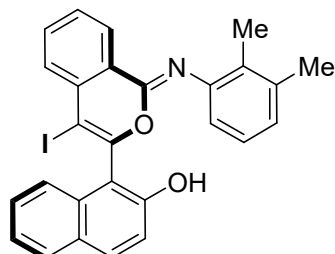

**Appearance:** white solid.

**Yield:** 86%, 22.3 mg

**<sup>1</sup>H NMR** (400 MHz, Acetone-*d*<sub>6</sub>):  $\delta$  9.09 (s, 1H), 8.45 (d,  $J = 9.4$  Hz, 1H), 7.90 – 7.69 (m, 5H), 7.64 (t,  $J = 7.4$  Hz, 1H), 7.54 – 7.44 (m, 1H), 7.34 (t,  $J = 7.5$  Hz, 1H), 7.22 (d,  $J = 8.9$  Hz, 1H), 6.87 (d,  $J = 7.8$  Hz, 1H), 6.75 (t,  $J = 7.7$  Hz, 1H), 6.64 (d,  $J = 7.2$  Hz, 1H), 2.12 (d,  $J = 7.5$  Hz, 6H).

**<sup>13</sup>C NMR** (125 MHz, Acetone-*d*<sub>6</sub>):  $\delta$  154.3, 152.0, 149.2, 146.0, 137.6, 135.5, 134.0, 133.4, 132.7, 131.4, 130.4, 129.3, 129.1, 129.0, 128.3, 128.2, 126.1, 125.7, 125.2, 124.5, 124.4, 119.6, 119.3, 117.2, 82.4, 20.4, 14.4.

**HRMS (ESI):** C<sub>27</sub>H<sub>20</sub>INO<sub>2</sub>+H, Calc: 518.0596, Found: 518.0612.

**Optical Rotation:**  $[\alpha]_{\text{D}}^{20} = +29^{\circ}$  ( $c = 1$ , acetone).

**IR (KBr,  $\text{cm}^{-1}$ ):** 2923, 1717, 1652, 1579, 1434, 1261, 1036, 939, 756.

**HPLC analysis:** Chiralcel IC-H (Hexane/*i*-PrOH = 95:5, flow rate = 1.0 mL/min,  $t_{\text{R}} = 5.713$  min (minor),  $t_{\text{R}} = 9.170$  min (major).

**(*R*<sub>a</sub>)-1-(1-((3,4-dimethylphenyl)imino)-4-iodo-1*H*-isochromen-3-yl)naphthalen-2-ol (3p)**

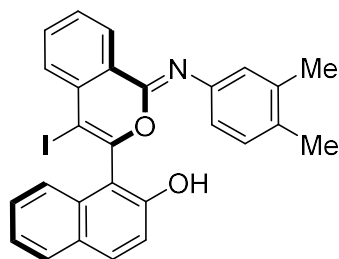

**Appearance:** white solid.

**Yield:** 78%, 20.2 mg

**<sup>1</sup>H NMR** (400 MHz, Acetone-*d*<sub>6</sub>):  $\delta$  9.12 (s, 1H), 8.40 (d,  $J = 7.3$  Hz, 1H), 7.89 (dd,  $J = 21.5, 8.5$  Hz, 2H), 7.81 – 7.72 (m, 3H), 7.60 (ddd,  $J = 8.3, 5.9, 2.6$  Hz, 1H), 7.52 (t,  $J = 7.6$  Hz, 1H), 7.41 – 7.34 (m, 1H), 7.27 (d,  $J = 8.9$  Hz, 1H), 6.99 (s, 1H), 6.89 (d,  $J = 10.3$  Hz, 1H), 6.83 (d,  $J = 8.1$  Hz, 1H), 2.04 (s, 3H), 1.98 (s, 3H).

**<sup>13</sup>C NMR** (100 MHz, Acetone-*d*<sub>6</sub>):  $\delta$  154.4, 151.9, 149.4, 144.6, 137.0, 135.5, 133.9, 133.5, 132.7, 132.5, 131.4, 130.4, 130.3, 129.3, 129.2, 128.2, 128.1, 125.3, 125., 124.6, 124.3, 121.2, 119.3, 117.1, 82.3, 19.7, 19.2.

**HRMS (ESI):** C<sub>27</sub>H<sub>20</sub>INO<sub>2</sub>+H, Calc: 518.0596, Found: 518.0612.

**Optical Rotation:**  $[\alpha]_{\text{D}}^{20} = +73^{\circ}$  ( $c = 1$ , acetone).

**IR (KBr, cm<sup>-1</sup>):** 2922, 1721, 1651, 1498, 1307, 1116, 1041, 968, 816.

**HPLC analysis:** Chiralcel IC-H (Hexane/*i*-PrOH = 95:5, flow rate = 1.0 mL/min,  $t_{\text{R}} = 6.043$  min (minor),  $t_{\text{R}} = 8.237$  min (major)).

**(*R<sub>a</sub>*)-1-(1-((3,4-dimethoxyphenyl)imino)-4-iodo-1*H*-isochromen-3-yl)naphthalen-2-ol (3q)**

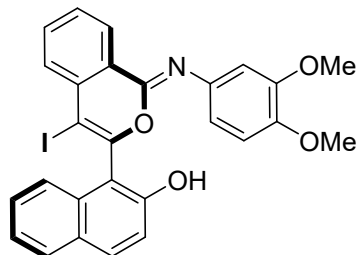

**Appearance:** white solid.

**Yield:** 91%, 25.0 mg

**<sup>1</sup>H NMR** (500 MHz, CD<sub>3</sub>CN):  $\delta$  8.37 (d,  $J = 7.9$  Hz, 1H), 7.92 (d,  $J = 9.0$  Hz, 1H), 7.87 (d,  $J = 8.2$  Hz, 1H), 7.78 – 7.69 (m, 3H), 7.60 (dd,  $J = 8.6, 3.6$  Hz, 1H), 7.47 (t,  $J = 7.6$  Hz, 1H), 7.37 (t,  $J = 7.5$  Hz, 1H), 7.20 (d,  $J = 9.0$  Hz, 1H), 6.82 (s, 1H), 6.74 – 6.66 (m, 2H), 3.66 (s, 3H), 3.26 (s, 3H).

**<sup>13</sup>C NMR** (125 MHz, CD<sub>3</sub>CN):  $\delta$  153.3, 150.6, 149.3, 148.9, 146.6, 139.5, 134.8, 133.7, 132.7, 132.6, 131.1, 130.3, 128.9, 128.3, 127.5, 124.9, 124.4, 124.1, 118.8, 116.4, 112.3, 107.9, 82.7, 56.0, 55.2.

**HRMS (ESI):** C<sub>27</sub>H<sub>20</sub>INO<sub>4</sub>+H, Calc: 550.0540, Found: 550.0510.

**Optical Rotation:**  $[\alpha]_{\text{D}}^{20} = +44^{\circ}$  ( $c = 1$ , acetone).

**IR (KBr, cm<sup>-1</sup>):** 2957, 1732, 1646, 1238, 1119, 1042, 932, 817, 755.

**HPLC analysis:** Chiralcel IC-H (Hexane/*i*-PrOH = 95:5, flow rate = 1.0 mL/min,  $t_{\text{R}} = 5.170$  min (minor),  $t_{\text{R}} = 8.930$  min (major)).

**(*R<sub>a</sub>*)-1-(1-((4-chloro-2-methylphenyl)imino)-4-iodo-1*H*-isochromen-3-yl)naphthalen-2-ol (3r)**

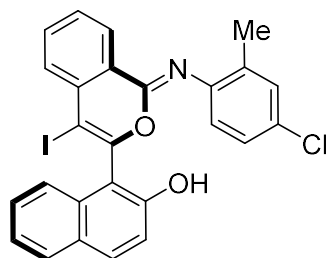

**Appearance:** white solid.

**Yield:** 98%, 26.4 mg

**<sup>1</sup>H NMR** (400 MHz, CD<sub>3</sub>CN):  $\delta$  8.42 (d,  $J = 7.8$  Hz, 1H), 7.86 (dd,  $J = 16.4, 8.0$  Hz, 2H), 7.77 (d,  $J = 3.5$  Hz, 2H), 7.67 – 7.59 (m, 2H), 7.51 – 7.42 (m, 2H), 7.36 (t,  $J = 7.5$  Hz, 1H), 7.16 (d,  $J = 8.9$  Hz, 1H), 7.08 (s, 1H), 6.94 – 6.83 (m, 2H), 2.15 (s, 3H).

**<sup>13</sup>C NMR** (100 MHz, CD<sub>3</sub>CN):  $\delta$  153.5, 150.8, 150.2, 144.9, 135.1, 134.3, 132.8, 132.7, 131.3, 130.5, 130.3, 128.9, 128.9, 128.2, 128.2, 128.0, 126.4, 124.6, 124.3, 124.1, 122.8, 118.8, 116.5, 83.0, 17.8.

**HRMS (ESI):** C<sub>26</sub>H<sub>17</sub>ClINO<sub>2</sub>+H, Calc: 538.0061, Found: 538.0065.

**Optical Rotation:**  $[\alpha]_{\text{D}}^{20} = +105^{\circ}$  ( $c = 1$ , acetone).

**IR (KBr, cm<sup>-1</sup>):** 2958, 1717, 1651, 1482, 1308, 1276, 1040, 939, 815.

**HPLC analysis:** Chiralcel IC-H (Hexane/*i*-PrOH = 95:5, flow rate = 1.0 mL/min,  $t_{\text{R}} = 4.433$  min (minor),  $t_{\text{R}} = 6.193$  min (major).

**(*R<sub>a</sub>*)-1-(4-iodo-1-(mesitylimino)-1*H*-isochromen-3-yl)naphthalen-2-ol (3s)**

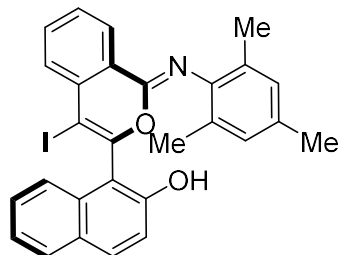

**Appearance:** white solid.

**Yield:** 84%, 22.3 mg

**<sup>1</sup>H NMR** (500 MHz, Acetone-*d*<sub>6</sub>):  $\delta$  9.13 (s, 1H), 8.51 (d,  $J = 7.9$  Hz, 1H), 7.80 (ddd,  $J = 32.2, 17.9, 8.4$  Hz, 4H), 7.63 (t,  $J = 7.2$  Hz, 2H), 7.47 (t,  $J = 7.6$  Hz, 1H), 7.33 (t,  $J = 7.5$  Hz, 1H), 7.19 (d,  $J = 9.0$  Hz, 1H), 6.62 (s, 2H), 2.07 (s, 6H), 2.03 (s, 3H).

**<sup>13</sup>C NMR** (125 MHz, Acetone-*d*<sub>6</sub>):  $\delta$  154.2, 152.0, 149.1, 143.0, 135.4, 134.1, 133.4, 132.6, 132.1, 131.4, 130.3, 129.2, 128.9, 128.4, 128.2, 128.0, 124.6, 124.3, 124.2, 119.2, 117.4, 82.4, 20.7, 18.4.

**HRMS (ESI):** C<sub>28</sub>H<sub>22</sub>INO<sub>2</sub>+H, Calc: 532.0778, Found: 532.0768.

**Optical Rotation:**  $[\alpha]_{\text{D}}^{20} = +133^{\circ}$  ( $c = 1$ , acetone).

**IR (KBr, cm<sup>-1</sup>):** 3185, 1725, 1603, 1574, 1307, 1287, 1173, 1051, 814.

**HPLC analysis:** Chiralcel IC-H (Hexane/*i*-PrOH = 95:5, flow rate = 1.0 mL/min,  $t_{\text{R}} = 4.570$  min (minor),  $t_{\text{R}} = 7.143$  min (major).

**(*R<sub>a</sub>*)-1-(4-iodo-1-(naphthalen-2-ylimino)-1*H*-isochromen-3-yl)naphthalen-2-ol (3t)**

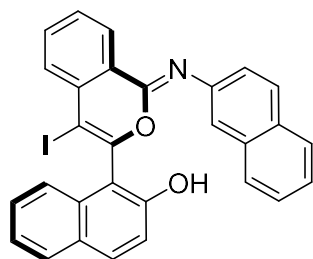

**Appearance:** white solid.

**Yield:** 76%, 20.5 mg

**<sup>1</sup>H NMR** (400 MHz, DMSO-*d*<sub>6</sub>):  $\delta$  10.28 (s, 1H), 8.40 (d,  $J = 7.8$  Hz, 1H), 7.84 (dd,  $J = 14.6, 9.4$  Hz, 3H), 7.75 – 7.62 (m, 5H), 7.56 (s, 1H), 7.50 (t,  $J = 7.5$  Hz, 2H), 7.37 – 7.26 (m, 4H), 7.22 (d,  $J = 8.9$  Hz, 1H).

**<sup>13</sup>C NMR** (100 MHz, DMSO-*d*<sub>6</sub>):  $\delta$  153.6, 150.6, 149.7, 143.4, 134.4, 133.7, 133.5, 132.0, 131.6, 130.3, 130.0, 129.6, 128.1, 127.9, 127.4, 127.4, 127.3, 127.0, 126.9, 126.0, 124.5, 123.4, 123.3, 123.2, 118.8, 118.3, 115.3, 82.3.

**HRMS (ESI):** C<sub>29</sub>H<sub>18</sub>INO<sub>2</sub>+H, Calc: 540.0432, Found: 540.0455.

**Optical Rotation:**  $[\alpha]_{\text{D}}^{20} = +89^{\circ}$  ( $c = 1$ , acetone).

**IR (KBr,  $\text{cm}^{-1}$ ):** 2924, 1747, 1645, 1579, 1504, 1286, 1071, 1050, 813.

**HPLC analysis:** Chiralcel IC-H (Hexane/*i*-PrOH = 95:5, flow rate = 1.0 mL/min,  $t_{\text{R}} = 8.073$  min (minor),  $t_{\text{R}} = 10.923$  min (major)).

**(*R*<sub>a</sub>)-1-(1-(benzylimino)-4-iodo-1*H*-isochromen-3-yl)naphthalen-2-ol (3u)**

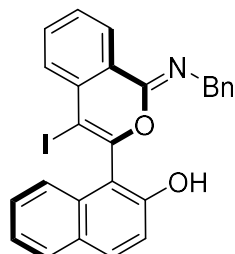

(1*H*)-isochromen-1-imines **3u** contained an alkylamine, which was unstable during the purification process. As a result, (1*H*)-isochromen-1-imines **3u** was hydrolyzed by 4M HCl to afford axially chiral isocoumarin **4**.

**HPLC analysis:** Chiralcel IC-H (Hexane/*i*-PrOH = 95:5, flow rate = 1.0 mL/min,  $t_{\text{R}} = 5.183$  min (minor),  $t_{\text{R}} = 9.800$  min (major)).

**(*R*<sub>a</sub>)-1-(7-chloro-4-iodo-1-(phenylimino)-1*H*-isochromen-3-yl)naphthalen-2-ol (3v)**

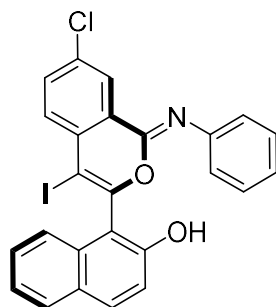

**Appearance:** white solid.

**Yield:** 99%, 25.9 mg.

**<sup>1</sup>H NMR** (400 MHz, Acetone-*d*<sub>6</sub>):  $\delta$  9.12 (s, 1H), 8.39 (s, 1H), 7.92 (d,  $J = 9.0$  Hz, 1H), 7.86 (d,  $J = 8.1$  Hz, 1H), 7.82 – 7.75 (m, 3H), 7.53 – 7.47 (m, 1H), 7.36 (t,  $J = 8.1$  Hz, 1H), 7.26 (d,  $J = 8.9$  Hz, 1H), 7.17 (d,  $J = 8.4$  Hz, 2H), 7.14 – 7.09 (m, 2H), 6.92 – 6.87 (m, 1H).

**<sup>13</sup>C NMR** (100 MHz, Acetone-*d*<sub>6</sub>):  $\delta$  154.4, 152.4, 148.8, 146.5, 135.7, 134.5, 133.9, 133.6, 133.4, 132.9, 129.4, 129.3, 129.2, 128.4, 127.3, 126.6, 124.9, 124.5, 124.5, 123.8, 119.3, 116.8, 81.2.

**HRMS (ESI):** C<sub>25</sub>H<sub>15</sub>ClINO<sub>2</sub>+H, Calc: 524.0180, Found: 523.9909.

**Optical Rotation:**  $[\alpha]_{\text{D}}^{20} = +40^{\circ}$  ( $c = 1$ , acetone).

**IR (KBr,  $\text{cm}^{-1}$ ):** 2966, 1647, 1580, 1435, 1271, 1189, 1066, 940, 816.

**HPLC analysis:** Chiralcel IC-H (Hexane/*i*-PrOH = 95:5, flow rate = 1.0 mL/min,  $t_{\text{R}} = 4.723$  min (minor),  $t_{\text{R}} = 6.127$  min (major)).

**(*R*<sub>a</sub>)-1-(4-iodo-7-methyl-1-(phenylimino)-1*H*-isochromen-3-yl)naphthalen-2-ol (3w)**

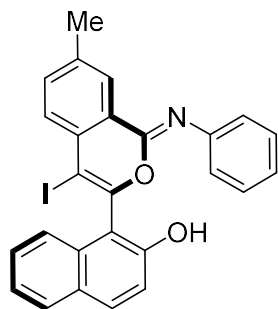

**Appearance:** white solid.

**Yield:** 98%, 24.7 mg.

**<sup>1</sup>H NMR** (400 MHz, DMSO-*d*<sub>6</sub>): δ 10.21 (s, 1H), 8.17 (s, 1H), 7.85 (dd, *J* = 17.8, 8.6 Hz, 2H), 7.67 – 7.55 (m, 3H), 7.45 (t, *J* = 7.0 Hz, 1H), 7.32 (t, *J* = 8.1 Hz, 1H), 7.22 (d, *J* = 9.0 Hz, 1H), 7.15 – 7.02 (m, 4H), 6.88 (t, *J* = 7.1 Hz, 1H), 2.50 (d, *J* = 3.2 Hz, 3H).

**<sup>13</sup>C NMR** (100 MHz, DMSO-*d*<sub>6</sub>): δ 153.7, 149.7, 149.2, 145.8, 139.4, 134.4, 132.0, 132.0, 131.5, 130.2, 128.5, 128.1, 127.4, 127.2, 126.8, 123.4, 123.2, 123.1, 123.0, 122.4, 118.4, 115.4, 82.1, 20.8.

**HRMS (ESI):** C<sub>26</sub>H<sub>18</sub>INO<sub>2</sub>+H, Calc: 504.0456, Found: 504.0455.

**Optical Rotation:** [α]<sub>D</sub><sup>20</sup> = +57° (*c* = 1, acetone).

**IR (KBr, cm<sup>-1</sup>):** 2922, 1638, 1500, 1393, 1309, 1274, 1140, 1074, 813.

**HPLC analysis:** Chiralcel IC-H (Hexane/*i*-PrOH = 95:5, flow rate = 1.0 mL/min, *t*<sub>R</sub> = 5.737 min (minor), *t*<sub>R</sub> = 10.087 min (major)).

**(*R*<sub>a</sub>)-1-(4-iodo-7-methoxy-1-(phenylimino)-1*H*-isochromen-3-yl)naphthalen-2-ol (3x)**

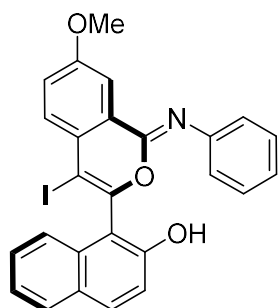

**Appearance:** white solid.

**Yield:** 93%, 24.2 mg.

**<sup>1</sup>H NMR** (400 MHz, Acetone-*d*<sub>6</sub>): δ 9.05 (s, 1H), 7.95 (d, *J* = 2.8 Hz, 1H), 7.90 (d, *J* = 9.0 Hz, 1H), 7.85 (d, *J* = 6.8 Hz, 1H), 7.72 (dd, *J* = 8.7, 5.6 Hz, 2H), 7.48 (t, *J* = 8.3 Hz, 1H), 7.39 – 7.31 (m, 2H), 7.24 (d, *J* = 8.9 Hz, 1H), 7.19 – 7.04 (m, 4H), 6.91 – 6.83 (m, 1H), 3.99 (s, 3H).

**<sup>13</sup>C NMR** (100 MHz, Acetone-*d*<sub>6</sub>): δ 161.7, 154.5, 150.1, 149.4, 147.1, 133.6, 133.3, 132.7, 129.3, 129.2, 129.0, 128.2, 126.2, 124.6, 124.4, 124.4, 123.7, 121.7, 119.4, 117.0, 110.5, 82.2, 56.4.

**HRMS (ESI):** C<sub>26</sub>H<sub>18</sub>INO<sub>2</sub>+H, Calc: 520.0392, Found: 520.0404.

**Optical Rotation:** [α]<sub>D</sub><sup>20</sup> = +158° (*c* = 1, acetone).

**IR (KBr, cm<sup>-1</sup>):** 2924, 1637, 1603, 1589, 1490, 1340, 1203, 1034, 818.

**HPLC analysis:** Chiralcel IC-H (Hexane/*i*-PrOH = 95:5, flow rate = 1.0 mL/min, *t*<sub>R</sub> = 8.890 min (minor), *t*<sub>R</sub> = 15.580 min (major)).

**(*R*<sub>a</sub>)-1-(8-fluoro-4-iodo-1-(phenylimino)-1*H*-isochromen-3-yl)naphthalen-2-ol (3y)**

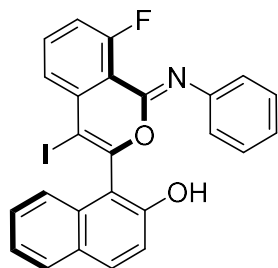

**Appearance:** white solid.

**Yield:** 88%, 23.4 mg.

**<sup>1</sup>H NMR** (400 MHz, Acetone-*d*<sub>6</sub>): δ 9.08 (s, 1H), 8.45 (d, *J* = 7.9 Hz, 1H), 7.88 (d, *J* = 8.9 Hz, 1H), 7.85 – 7.76 (m, 3H), 7.72 (d, *J* = 8.4 Hz, 1H), 7.65 (t, *J* = 7.4 Hz, 1H), 7.49 (t, *J* = 7.6 Hz, 1H), 7.34 (t, *J* = 7.5 Hz, 1H), 7.19 (dd, *J* = 27.2, 8.4 Hz, 2H), 6.99 – 6.79 (m, 3H).

**<sup>13</sup>C NMR** (125 MHz, Acetone-*d*<sub>6</sub>): δ 155.3(d, *J* = 244.4 Hz) 151.9, 151.8, 135.7, 135.4, 135.3, 134.5, 133.4, 132.8, 131.6, 130.5, 129.2, 129.1, 128.4(d, *J* = 39.1 Hz), 125.3(d, *J* = 7.56 Hz), 124.9(d, *J* = 3.78 Hz), 124.4(d, *J* = 8.82 Hz), 119.3, 116.9, 116.4(d, *J* = 21.4 Hz), 83.0.

**<sup>19</sup>F NMR** (376 MHz, Acetone-*d*<sub>6</sub>): δ -124.34.

**HRMS (ESI):** C<sub>25</sub>H<sub>15</sub>FINO<sub>2</sub>+H, Calc: 508.0157, Found: 508.0204.

**Optical Rotation:** [α]<sub>D</sub><sup>20</sup> = +73° (*c* = 1, acetone).

**IR (KBr, cm<sup>-1</sup>):** 2924, 1722, 1651, 1584, 1307, 1276, 1071, 1044, 818.

**HPLC analysis:** Chiralcel IC-H (Hexane/*i*-PrOH = 95:5, flow rate = 1.0 mL/min, *t*<sub>R</sub> = 7.887 min (minor), *t*<sub>R</sub> = 13.813 min (major).

**(*R*<sub>a</sub>)-1-(4-iodo-1-(phenylimino)-1*H*-isochromen-3-yl)-7-phenylnaphthalen-2-ol (3z)**

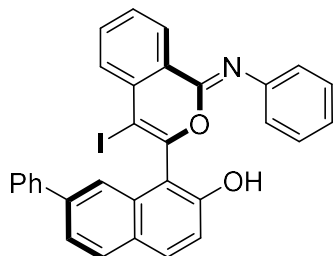

**Appearance:** white solid.

**Yield:** 99%, 28.0 mg.

**<sup>1</sup>H NMR** (400 MHz, Acetone-*d*<sub>6</sub>): δ 9.23 (s, 1H), 8.41 (d, *J* = 7.9 Hz, 1H), 8.03 – 7.89 (m, 3H), 7.76 (d, *J* = 4.2 Hz, 2H), 7.71 – 7.54 (m, 4H), 7.41 (t, *J* = 7.6 Hz, 2H), 7.30 (dd, *J* = 18.0, 8.1 Hz, 2H), 7.16 (d, *J* = 8.1 Hz, 2H), 7.08 (t, *J* = 7.8 Hz, 2H), 6.86 (t, *J* = 7.3 Hz, 1H).

**<sup>13</sup>C NMR** (125 MHz, Acetone-*d*<sub>6</sub>): δ 155.0, 151.7, 150.0, 147.1, 142.0, 140.9, 135.6, 134.1, 133.7, 132.6, 131.5, 130.4, 130.0, 129.8, 129.3, 128.5, 128.4, 128.3, 128.2, 125.3, 124.4, 124.0, 123.6, 122.3, 119.5, 117.48, 82.9.

**HRMS (ESI):** C<sub>31</sub>H<sub>20</sub>INO<sub>2</sub>+H, Calc: 566.0815, Found: 566.0612.

**Optical Rotation:** [α]<sub>D</sub><sup>20</sup> = +49° (*c* = 1, acetone).

**IR (KBr, cm<sup>-1</sup>):** 3039, 1646, 1615, 1580, 1435, 1189, 1042, 936, 751.

**HPLC analysis:** Chiralcel IC-H (Hexane/*i*-PrOH = 95:5, flow rate = 1.0 mL/min, *t*<sub>R</sub> = 5.597 min (minor), *t*<sub>R</sub> = 8.590 min (major).

**(*R<sub>a</sub>*)-1-(4-iodo-1-(phenylimino)-1*H*-isochromen-3-yl)-6-phenylnaphthalen-2-ol (3aa)**

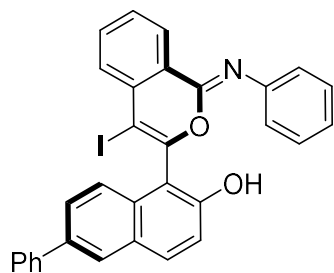

**Appearance:** white solid.

**Yield:** 89%, 25.2 mg.

**<sup>1</sup>H NMR** (400 MHz, DMSO-*d*<sub>6</sub>): δ 10.30 (s, 1H), 8.35 (d, *J* = 7.9 Hz, 1H), 8.15 (s, 1H), 7.98 (d, *J* = 8.9 Hz, 1H), 7.91 – 7.55 (m, 8H), 7.49 (t, *J* = 7.7 Hz, 2H), 7.37 (t, *J* = 8.0 Hz, 1H), 7.26 (d, *J* = 8.9 Hz, 1H), 7.16 – 7.05 (m, 4H), 6.92 – 6.85 (m, 1H).

**<sup>13</sup>C NMR** (125 MHz, DMSO-*d*<sub>6</sub>): δ 150.5, 149.1, 145.7, 139.9, 134.8, 134.3, 133.6, 132.0, 131.3, 130.2, 129.6, 129.0, 127.7, 127.2, 127.0, 126.7, 126.4, 125.7, 124.0, 123.5, 123.4, 122.5, 119.0, 115.4, 82.3.

**HRMS (ESI):** C<sub>31</sub>H<sub>20</sub>INO<sub>2</sub>+H, Calc: 566.0874, Found: 566.0612.

**Optical Rotation:** [α]<sub>D</sub><sup>20</sup> = +181° (*c* = 1, acetone).

**IR (KBr, cm<sup>-1</sup>):** 3060, 1644, 1589, 1489, 1288, 1128, 1040, 941, 813.

**HPLC analysis:** Chiralcel IC-H (Hexane/*i*-PrOH = 95:5, flow rate = 1.0 mL/min, *t<sub>R</sub>* = 5.953 min (minor), *t<sub>R</sub>* = 8.870 min (major).

**(*R<sub>a</sub>*)-1-(4-iodo-1-(phenylimino)-1*H*-isochromen-3-yl)-7-methylnaphthalen-2-ol (3ab)**

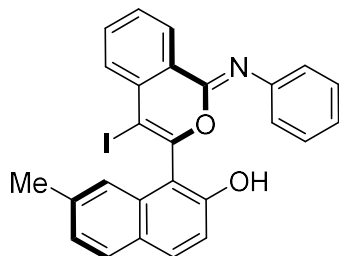

**Appearance:** white solid.

**Yield:** 70%, 17.6 mg.

**<sup>1</sup>H NMR** (400 MHz, DMSO-*d*<sub>6</sub>): δ 10.23 (s, 1H), 8.32 (d, *J* = 7.8 Hz, 1H), 7.91 (d, *J* = 9.0 Hz, 1H), 7.86 (d, *J* = 8.1 Hz, 1H), 7.77 (t, *J* = 7.6 Hz, 1H), 7.67 (d, *J* = 7.8 Hz, 1H), 7.60 (q, *J* = 3.9 Hz, 2H), 7.45 (t, *J* = 7.7 Hz, 1H), 7.33 (t, *J* = 7.5 Hz, 1H), 7.25 (d, *J* = 8.9 Hz, 1H), 7.11 (d, *J* = 8.9 Hz, 2H), 6.68 (d, *J* = 8.9 Hz, 2H), 3.61 (s, 3H).

**<sup>13</sup>C NMR** (100 MHz, DMSO-*d*<sub>6</sub>): δ 155.7, 153.6, 150.6, 148.0, 138.2, 134.1, 133.2, 132.0, 131.5, 130.1, 129.4, 128.2, 127.4, 127.3, 126.8, 124.3, 123.7, 123.2, 118.5, 115.6, 113.7, 82.1, 55.0.

**HRMS (ESI):** C<sub>26</sub>H<sub>18</sub>INO<sub>2</sub>+H, Calc: 504.0434, Found: 504.0455.

**Optical Rotation:** [α]<sub>D</sub><sup>20</sup> = +45° (*c* = 0.8, acetone).

**IR (KBr, cm<sup>-1</sup>):** 2922, 1644, 1588, 1201, 1040, 946, 830, 745, 756.

**HPLC analysis:** Chiralcel IC-H (Hexane/*i*-PrOH = 95:5, flow rate = 1.0 mL/min, *t<sub>R</sub>* = 5.293 min (minor), *t<sub>R</sub>* = 8.300 min (major).

## General procedure and spectral data for the synthesis of **4**

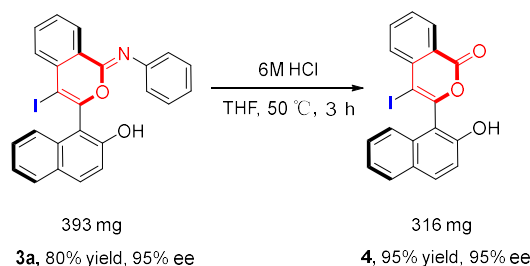

To a solution of **3a** (393 mg) in THF (10 mL) was added a few drops of 6M HCl aq. at room temperature. Then the reaction mixture was stirred for 3h at 50 °C. After the reaction performed completely, the solvent was removed under vacuum and residue was purified by flash column chromatography (petroleum ether/EA 1:8) to give the pure desired product **4** (316mg, 95% yield) as a white solid.

### Spectral data for axially chiral isocoumarin **4**

#### (*R*)-3-(2-hydroxynaphthalen-1-yl)-4-iodo-1*H*-isochromen-1-one (**4**)

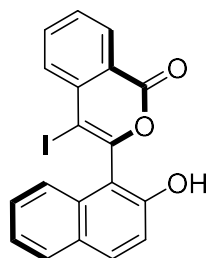

**Appearance:** white solid.

**Yield:** 71%, 14.7 mg.

**<sup>1</sup>H NMR** (400 MHz, Acetone-*d*<sub>6</sub>): δ 9.13 (s, 1H), 8.29 (d, *J* = 7.8 Hz, 1H), 7.97 (dd, *J* = 8.3, 4.6 Hz, 2H), 7.89 (t, *J* = 7.6 Hz, 2H), 7.71 (dq, *J* = 15.7, 7.5 Hz, 2H), 7.48 (t, *J* = 7.6 Hz, 1H), 7.38 (t, *J* = 7.4 Hz, 1H), 7.32 (d, *J* = 8.8 Hz, 1H).

**<sup>13</sup>C NMR** (100 MHz, Acetone-*d*<sub>6</sub>): δ 162.6, 154.4, 153.3, 139.0, 136.7, 133.4, 132.9, 131.8, 130.5, 130.3, 129.3, 129.2, 128.4, 124.5, 124.4, 121.9, 119.3, 117.1, 110.4, 83.2.

**HRMS (ESI):** C<sub>19</sub>H<sub>11</sub>I<sub>03</sub>+H, Calc: 414.9860, Found: 414.9826.

**Optical Rotation:** [α]<sub>D</sub><sup>20</sup> = +134° (*c* = 1, acetone).

**IR (KBr, cm<sup>-1</sup>):** 3287, 1763, 1562, 1278, 1229, 938, 829, 764.

**HPLC analysis:** Chiralcel IB-H (Hexane/*i*-PrOH = 8:2, flow rate = 1.0 mL/min, *t*<sub>R</sub> = 9.743min (major), *t*<sub>R</sub> = 16.463 min (minor).



## General procedure and spectral data for the synthesis of 5

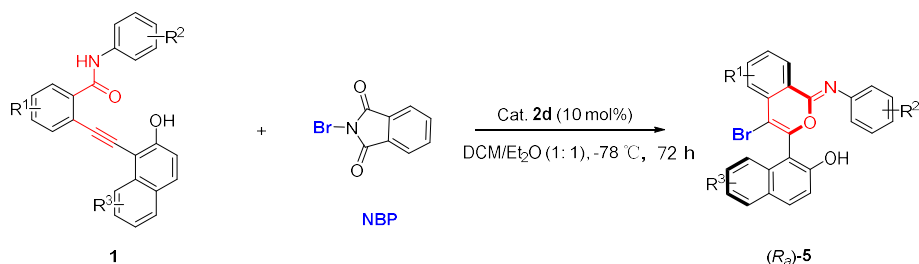

To a solution of **1** (0.05 mmol) and catalyst **2d** (10 mol%) in DCM: Et<sub>2</sub>O (1:1 vol/vol, 2 mL) was added NBP (1.1 equiv, 0.055 mmol) slowly at -78 °C. Then, the reaction mixture was stirred for 72 h at -78 °C. After the reaction performed completely, the solvent was removed under vacuum and residue was purified by flash column chromatography (petroleum ether/DCM 1:10) to give the pure desired products  $(R_a)$ -5 as a white solid.

### Spectral data for (1H)-isochromen-1-imines 5

#### $(R_a)$ -1-(4-bromo-1-(phenylimino)-1H-isochromen-3-yl)naphthalen-2-ol (**5a**)

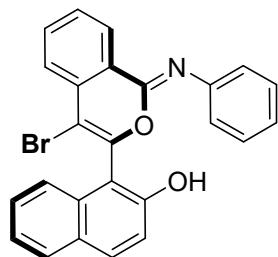

**Appearance:** white solid.

**Yield:** 72%, 15.9 mg.

**<sup>1</sup>H NMR** (400 MHz, Acetone-*d*<sub>6</sub>): δ 9.15 (d, *J* = 5.4 Hz, 1H), 8.46 (d, *J* = 7.8 Hz, 1H), 7.91 (d, *J* = 9.0 Hz, 1H), 7.82 (d, *J* = 7.1 Hz, 4H), 7.65 (d, *J* = 6.4 Hz, 1H), 7.52 – 7.46 (m, 1H), 7.35 (t, *J* = 10.3 Hz, 1H), 7.27 (d, *J* = 9.2 Hz, 1H), 7.17 (d, *J* = 7.7 Hz, 2H), 7.10 (d, *J* = 7.8 Hz, 2H), 6.88 (d, *J* = 6.2 Hz, 1H).

**<sup>13</sup>C NMR** (100 MHz, Acetone-*d*<sub>6</sub>): δ 154.7, 149.6, 148.7, 146.9, 134.0, 133.5, 132.9, 130.4, 129.4, 129.4, 129.2, 128.4, 128.3, 126.6, 125.7, 124.6, 124.4, 123.7, 119.3, 119.3, 114.2, 114.2, 106.6.

**HRMS (ESI):** C<sub>25</sub>H<sub>16</sub>BrNO<sub>2</sub>+H, Calc: 442.0437, Found: 442.0438.

**Optical Rotation:** [ $\alpha$ ]<sub>D</sub><sup>20</sup> = +29° (*c* = 1, acetone).

**IR (KBr, cm<sup>-1</sup>):** 2927, 1740, 1643, 1603, 1508, 1435, 1283, 1053, 809.

**HPLC analysis:** Chiralcel IC-H (Hexane/*i*-PrOH = 95:5, flow rate = 1.0 mL/min, *t*<sub>R</sub> = 5.387 min (minor), *t*<sub>R</sub> = 8.877 min (major).

#### $(R_a)$ -1-(4-bromo-1-(*o*-tolylimino)-1H-isochromen-3-yl)naphthalen-2-ol (**5b**)

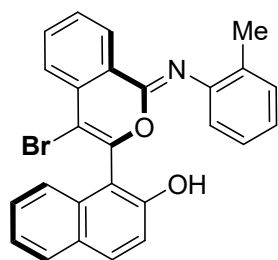

**Appearance:** white solid.

**Yield:** 75%, 17.1 mg.

**<sup>1</sup>H NMR** (400 MHz, Acetone-*d*<sub>6</sub>): δ 9.17 (s, 1H), 8.50 (d, *J* = 7.8 Hz, 1H), 7.93 – 7.82 (m, 4H), 7.74 (d, *J* = 8.4 Hz, 1H), 7.70 – 7.64 (m, 1H), 7.48 (t, *J* = 7.6 Hz, 1H), 7.34 (t, *J* = 7.5 Hz, 1H), 7.23 (d, *J* = 8.9 Hz, 1H), 7.03 (d, *J* = 8.4 Hz, 2H), 6.88 (t, *J* = 7.6 Hz, 1H), 6.76 (t, *J* = 7.3 Hz, 1H), 2.21 (s, 3H).

**<sup>13</sup>C NMR** (100 MHz, Acetone-*d*<sub>6</sub>): δ 154.6, 149.0, 149.0, 146.0, 134.0, 133.5, 132.8, 130.8, 130.7, 130.4, 129.3, 129.2, 128.5, 128.3, 126.8, 126.6, 125.6, 124.5, 124.4, 124.2, 121.9, 119.3, 106.4, 19.0.

**HRMS (ESI):** C<sub>25</sub>H<sub>16</sub>BrNO<sub>2</sub>+H, Calc: 456.0594, Found: 456.0594.

**Optical Rotation:** [α]<sub>D</sub><sup>20</sup> = +47° (*c* = 1, acetone).

**IR (KBr, cm<sup>-1</sup>):** 2918, 1726, 1617, 1643, 1433, 1380, 1279, 1085, 822.

**HPLC analysis:** Chiralcel IC-H (Hexane/*i*-PrOH = 95:5, flow rate = 1.0 mL/min, *t*<sub>R</sub> = 4.903 min (minor), *t*<sub>R</sub> = 7.667 min (major).

**(*R*)-1-(4-bromo-1-((2-fluorophenyl)imino)-1H-isochromen-3-yl)naphthalen-2-ol (5c)**

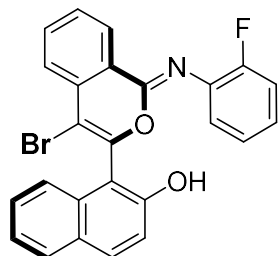

**Appearance:** white solid.

**Yield:** 92%, 21.2 mg.

**<sup>1</sup>H NMR** (400 MHz, DMSO-*d*<sub>6</sub>): δ 10.27 (s, 1H), 8.44 (d, *J* = 7.9 Hz, 1H), 7.97 – 7.76 (m, 4H), 7.70 (t, *J* = 7.6 Hz, 1H), 7.61 (d, *J* = 8.4 Hz, 1H), 7.45 (t, *J* = 7.6 Hz, 1H), 7.32 (t, *J* = 7.5 Hz, 1H), 7.19 (dd, *J* = 27.7, 8.4 Hz, 2H), 7.09 – 7.00 (m, 1H), 6.94 (q, *J* = 7.5 Hz, 2H).

**<sup>13</sup>C NMR** (100 MHz, DMSO-*d*<sub>6</sub>): δ 153.9, 153.7 (d, *J* = 245.4 Hz), 150.4, 147.8, 133.8, 133.6, 132.6, 132.0, 131.8, 129.7, 128.1, 127.5 (d, *J* = 17.2 Hz), 127.4, 125.5, 124.6 (d, *J* = 10.1 Hz), 124.2 (d, *J* = 5.1 Hz), 123.8, 123.1 (d, *J* = 13.1 Hz), 123.1, 118.3, 115.6 (d, *J* = 20.2 Hz), 112.3, 105.4.

**<sup>19</sup>F NMR** (376 MHz, DMSO): δ -123.44.

**HRMS (ESI):** C<sub>25</sub>H<sub>15</sub>BrFNO<sub>2</sub>+H, Calc: 460.0340, Found: 460.0343.

**Optical Rotation:** [α]<sub>D</sub><sup>20</sup> = +111° (*c* = 1, acetone).

**IR (KBr, cm<sup>-1</sup>):** 2923, 1620, 1567, 1489, 1359, 1290, 1179, 975, 820.

**HPLC analysis:** Chiralcel IC-H (Hexane/*i*-PrOH = 95:5, flow rate = 1.0 mL/min, *t*<sub>R</sub> = 5.353 min (minor), *t*<sub>R</sub> = 8.877 min (major).

**(*R<sub>a</sub>*)-1-(4-bromo-1-((2-chlorophenyl)imino)-1H-isochromen-3-yl)naphthalen-2-ol (5d)**

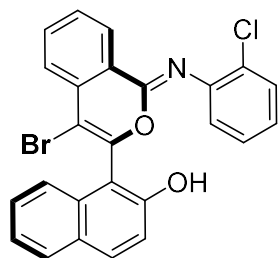

**Appearance:** white solid.

**Yield:** 91%, 21.7 mg.

**<sup>1</sup>H NMR** (400 MHz, Acetone-*d*<sub>6</sub>): δ 9.20 (s, 1H), 8.46 (d, *J* = 7.9 Hz, 1H), 7.93 (d, *J* = 8.9 Hz, 1H), 7.83 (dd, *J* = 20.4, 7.0 Hz, 4H), 7.68 (d, *J* = 13.1 Hz, 1H), 7.51 (t, *J* = 7.7 Hz, 1H), 7.37 (dd, *J* = 14.2, 6.5 Hz, 2H), 7.28 (d, *J* = 9.0 Hz, 1H), 7.13 (d, *J* = 6.7 Hz, 1H), 7.06 (d, *J* = 6.6 Hz, 2H).

**<sup>13</sup>C NMR** (100 MHz, Acetone-*d*<sub>6</sub>): δ 154.6, 151.0, 148.8, 144.9, 134.5, 134.1, 133.5, 133.0, 130.6, 130.3, 129.3, 129.1, 128.8, 128.3, 128.0, 127.2, 126.7, 125.3, 124.9, 124.6, 124.4, 123.9, 119.2, 113.9, 106.9.

**HRMS (ESI):** C<sub>25</sub>H<sub>15</sub>BrClNO<sub>2</sub>+H, Calc: 476.0042, Found: 476.0047.

**Optical Rotation:** [α]<sub>D</sub><sup>20</sup> = +49° (*c* = 1, acetone).

**IR (KBr, cm<sup>-1</sup>):** 2989, 1653, 1616, 1585, 1434, 1197, 1086, 1050, 824.

**HPLC analysis:** Chiralcel IC-H (Hexane/*i*-PrOH = 95:5, flow rate = 1.0 mL/min, *t<sub>R</sub>* = 5.093 min (minor), *t<sub>R</sub>* = 7.907 min (major)).

**(*R<sub>a</sub>*)-1-(4-bromo-1-((3-bromophenyl)imino)-1H-isochromen-3-yl)naphthalen-2-ol (5e)**

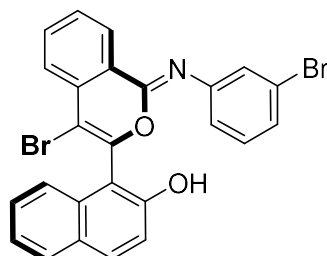

**Appearance:** white solid.

**Yield:** 87%, 22.7 mg.

**<sup>1</sup>H NMR** (400 MHz, Acetone-*d*<sub>6</sub>): δ 9.22 (s, 1H), 8.46 (d, *J* = 8.1 Hz, 1H), 7.93 (d, *J* = 8.9 Hz, 1H), 7.88 – 7.78 (m, 4H), 7.67 (ddd, *J* = 8.4, 6.3, 2.3 Hz, 1H), 7.54 – 7.48 (m, 1H), 7.41 (d, *J* = 2.9 Hz, 1H), 7.36 (t, *J* = 7.5 Hz, 1H), 7.29 (d, *J* = 8.9 Hz, 1H), 7.16 – 7.11 (m, 1H), 7.10 – 7.02 (m, 2H).

**<sup>13</sup>C NMR** (100 MHz, Acetone-*d*<sub>6</sub>): δ 154.8, 150.8, 148.8, 148.7, 134.3, 134.1, 133.4, 133.1, 131.1, 130.5, 129.3, 129.2, 128.5, 128.4, 127.3, 126.7, 126.5, 125.2, 124.5, 124.4, 122.7, 122.6, 119.3, 114.0, 106.8.

**HRMS (ESI):** C<sub>25</sub>H<sub>15</sub>Br<sub>2</sub>NO<sub>2</sub>+H, Calc: 521.9487, Found: 521.9699.

**Optical Rotation:** [α]<sub>D</sub><sup>20</sup> = +142° (*c* = 1, acetone).

**IR (KBr, cm<sup>-1</sup>):** 2989, 1646, 1608, 1584, 1435, 1285, 1195, 977, 824.

**HPLC analysis:** Chiralcel IC-H (Hexane/*i*-PrOH = 95:5, flow rate = 1.0 mL/min, *t<sub>R</sub>* = 4.830 min (minor), *t<sub>R</sub>* = 6.873 min (major)).

**(*R<sub>a</sub>*)-1-(4-bromo-1-(*m*-tolylimino)-1*H*-isochromen-3-yl)naphthalen-2-ol (5f)**

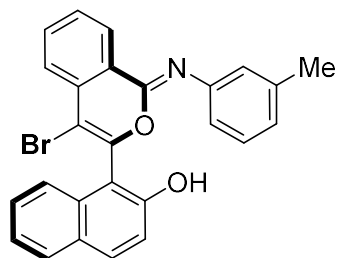

**Appearance:** white solid.

**Yield:** 80%, 18.2 mg.

**<sup>1</sup>H NMR** (400 MHz, Acetone-*d*<sub>6</sub>): δ 9.10 (s, 1H), 8.45 (d, *J* = 7.8 Hz, 1H), 7.92 (d, *J* = 8.9 Hz, 1H), 7.88 – 7.75 (m, 4H), 7.65 (t, *J* = 8.3 Hz, 1H), 7.52 (t, *J* = 7.6 Hz, 1H), 7.36 (t, *J* = 7.5 Hz, 1H), 7.27 (d, *J* = 8.9 Hz, 1H), 7.05 – 6.91 (m, 3H), 6.69 (d, *J* = 7.2 Hz, 1H), 2.08 (s, 3H).

**<sup>13</sup>C NMR** (125 MHz, Acetone-*d*<sub>6</sub>): δ 154.7, 149.4, 148.8, 146.9, 138.8, 134.0, 133.9, 133.6, 132.9, 130.4, 129.4, 129.2, 128.4, 128.3, 126.6, 125.8, 125.3, 124.7, 124.4, 120.7, 119.3, 114.3, 106.5, 21.4.

**HRMS (ESI):** C<sub>25</sub>H<sub>18</sub>BrNO<sub>2</sub>+H, Calc: 456.0590, Found: 456.0594.

**Optical Rotation:** [α]<sub>D</sub><sup>20</sup> = +107° (*c* = 1, acetone).

**IR (KBr, cm<sup>-1</sup>):** 2972, 1645, 1609, 1579, 1436, 1328, 1286, 1075, 794.

**HPLC analysis:** Chiralcel IC-H (Hexane/*i*-PrOH = 95:5, flow rate = 1.0 mL/min, *t<sub>R</sub>* = 5.310 min (minor), *t<sub>R</sub>* = 7.523 min (major).

**(*R<sub>a</sub>*)-1-(4-bromo-1-((3-chlorophenyl)imino)-1*H*-isochromen-3-yl)naphthalen-2-ol (5g)**

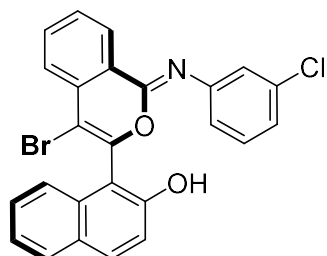

**Appearance:** white solid.

**Yield:** 64%, 15.2 mg.

**<sup>1</sup>H NMR** (400 MHz, Acetone-*d*<sub>6</sub>): δ 9.17 (s, 1H), 8.46 (d, *J* = 7.7 Hz, 1H), 7.93 (d, *J* = 9.0 Hz, 1H), 7.90 – 7.78 (m, 4H), 7.67 (t, *J* = 8.3 Hz, 1H), 7.53 – 7.48 (m, 1H), 7.36 (t, *J* = 8.1 Hz, 1H), 7.31 – 7.21 (m, 2H), 7.12 (d, *J* = 7.7 Hz, 2H), 6.91 (dt, *J* = 7.1, 2.0 Hz, 1H).

**<sup>13</sup>C NMR** (100 MHz, Acetone-*d*<sub>6</sub>): δ 154.8, 148.7, 134.5, 134.3, 134.1, 133.5, 133.1, 130.8, 130.5, 129.3, 129.2, 128.5, 128.4, 126.7, 125.3, 124.6, 124.5, 124.4, 123.6, 122.3, 119.3, 114.0, 106.9.

**HRMS (ESI):** C<sub>25</sub>H<sub>15</sub>BrClNO<sub>2</sub>+H, Calc: 476.0016, Found: 476.0047.

**Optical Rotation:** [α]<sub>D</sub><sup>20</sup> = +57° (*c* = 1, acetone).

**IR (KBr, cm<sup>-1</sup>):** 2988, 1645, 1609, 1576, 1436, 1285, 1196, 1073, 824.

**HPLC analysis:** Chiralcel IC-H (Hexane/*i*-PrOH = 95:5, flow rate = 1.0 mL/min, *t<sub>R</sub>* = 4.627 min (minor), *t<sub>R</sub>* = 6.440 min (major).

**(*R<sub>a</sub>*)-1-(4-bromo-1-((4-fluorophenyl)imino)-1*H*-isochromen-3-yl)naphthalen-2-ol (5h)**

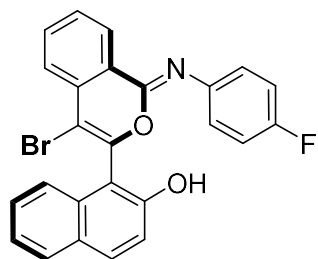

**Appearance:** white solid.

**Yield:** 84%, 19.3 mg.

**<sup>1</sup>H NMR** (400 MHz, Acetone-*d*<sub>6</sub>): δ 9.17 (s, 1H), 8.46 (d, *J* = 7.9 Hz, 1H), 7.93 (d, *J* = 9.0 Hz, 1H), 7.89 – 7.77 (m, 4H), 7.64 (t, *J* = 7.5 Hz, 1H), 7.49 (t, *J* = 7.6 Hz, 1H), 7.35 (t, *J* = 7.5 Hz, 1H), 7.29 (d, *J* = 8.9 Hz, 1H), 7.27 – 7.19 (m, 2H), 6.88 (t, *J* = 8.8 Hz, 2H).

**<sup>13</sup>C NMR** (100 MHz, Acetone-*d*<sub>6</sub>): δ 161.4(d, *J* = 242.4 Hz), 154.8, 149.8, 148.6, 143.1, 133.9, 133.9, 133.4, 133.0, 130.4, 129.3, 129.2, 128.4, 128.4, 126.7, 125.6(d, *J* = 8.1 Hz), 124.5(d, *J* = 8.1 Hz), 119.3, 115.8(d, *J* = 23.2 Hz), 114.2, 106.7.

**<sup>19</sup>F NMR** (376 MHz, Acetone-*d*<sub>6</sub>): δ -120.82.

**HRMS (ESI):** C<sub>25</sub>H<sub>15</sub>BrFNO<sub>2</sub>+H, Calc: 460.0311, Found: 460.0343.

**Optical Rotation:** [α]<sub>D</sub><sup>20</sup> = +62° (*c* = 1, acetone).

**IR (KBr, cm<sup>-1</sup>):** 2972, 1645, 1588, 1504, 1436, 1283, 1196, 1076, 811.

**HPLC analysis:** Chiralcel IC-H (Hexane/*i*-PrOH = 95:5, flow rate = 1.0 mL/min, *t<sub>R</sub>* = 4.537 min (minor), *t<sub>R</sub>* = 6.773min (major).

**(*R<sub>a</sub>*)-1-(4-bromo-1-((4-chlorophenyl)imino)-1*H*-isochromen-3-yl)naphthalen-2-ol (5i)**

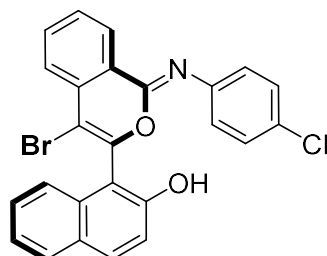

**Appearance:** white solid.

**Yield:** 89%, 21.2 mg.

**<sup>1</sup>H NMR** (400 MHz, Acetone-*d*<sub>6</sub>): δ 9.14 (s, 1H), 8.46 (d, *J* = 7.8 Hz, 1H), 7.93 (d, *J* = 8.9 Hz, 1H), 7.89 – 7.77 (m, 4H), 7.69 – 7.63 (m, 1H), 7.49 (t, *J* = 7.6 Hz, 1H), 7.36 (t, *J* = 7.5 Hz, 1H), 7.28 (d, *J* = 8.9 Hz, 1H), 7.23 – 7.08 (m, 4H).

**<sup>13</sup>C NMR** (100 MHz, Acetone-*d*<sub>6</sub>): δ 154.8, 154.7, 150.4, 148.7, 145.9, 134.2, 134.0, 133.4, 133.1, 130.5, 129.4, 129.2, 129.2, 128.5, 128.4, 126.7, 125.4, 124.6, 124.5, 119.3, 119.2, 114.1, 106.8.

**HRMS (ESI):** C<sub>25</sub>H<sub>15</sub>BrClNO<sub>2</sub>+H, Calc: 475.9892, Found: 476.0047.

**Optical Rotation:** [α]<sub>D</sub><sup>20</sup> = +74° (*c* = 1, acetone).

**IR (KBr, cm<sup>-1</sup>):** 2989, 1648, 1613, 1486, 1280, 1203, 1073, 949, 822.

**HPLC analysis:** Chiralcel IC-H (Hexane/*i*-PrOH = 95:5, flow rate = 1.0 mL/min, wave length = 254 nm), *t<sub>R</sub>* = 4.507 min (minor), *t<sub>R</sub>* = 6.787 min (major).

**(*R<sub>a</sub>*)-1-(4-bromo-1-((3,4-dimethylphenyl)imino)-1*H*-isochromen-3-yl)naphthalen-2-ol (5j)**

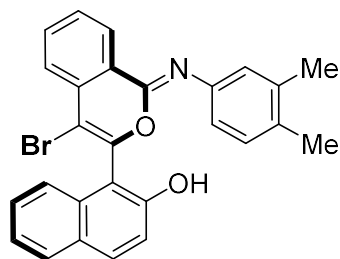

**Appearance:** white solid.

**Yield:** 88%, 20.7 mg.

**<sup>1</sup>H NMR** (400 MHz, Acetone-*d*<sub>6</sub>): δ 9.11 (s, 1H), 8.50 (d, *J* = 8.9 Hz, 1H), 7.88 (d, *J* = 8.9 Hz, 1H), 7.83 (t, *J* = 5.0 Hz, 3H), 7.74 (d, *J* = 7.7 Hz, 1H), 7.70 – 7.61 (m, 1H), 7.53 – 7.44 (m, 1H), 7.39 – 7.29 (m, 1H), 7.23 (d, *J* = 8.9 Hz, 1H), 6.89 (d, *J* = 7.7 Hz, 1H), 6.76 (t, *J* = 7.7 Hz, 1H), 6.66 (d, *J* = 7.6 Hz, 1H), 2.13 (d, *J* = 6.4 Hz, 6H).

**<sup>13</sup>C NMR** (125 MHz, Acetone-*d*<sub>6</sub>): δ 154.6, 145.9, 137.6, 133.9, 133.9, 133.5, 132.8, 130.4, 129.3, 129.2, 129.0, 128.4, 128.2, 126.6, 126.1, 125.7, 125.7, 124.5, 124.4, 119.6, 119.3, 114.4, 106.4, 20.4, 14.4.

**HRMS (ESI):** C<sub>27</sub>H<sub>20</sub>BrNO<sub>2</sub>+H, Calc: 470.0734, Found: 470.0750.

**Optical Rotation:** [α]<sub>D</sub><sup>20</sup> = +121° (*c* = 1, acetone).

**IR (KBr, cm<sup>-1</sup>):** 2971, 1652, 1626, 1584, 1435, 1278, 1051, 818, 746.

**HPLC analysis:** Chiralcel IC-H (Hexane/*i*-PrOH = 95:5, flow rate = 1.0 mL/min, *t<sub>R</sub>* = 6.000min (minor), *t<sub>R</sub>* = 8.813 min (major).

**(*R<sub>a</sub>*)-1-(4-bromo-1-((4-chloro-2-methylphenyl)imino)-1*H*-isochromen-3-yl)naphthalen-2-ol (5k)**

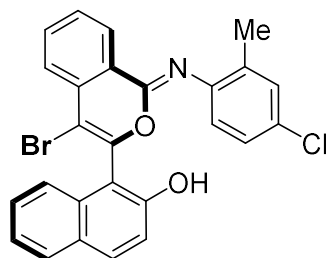

**Appearance:** white solid.

**Yield:** 82%, 20.1 mg.

**<sup>1</sup>H NMR** (400 MHz, Acetone-*d*<sub>6</sub>): δ 9.12 (s, 1H), 8.49 (d, *J* = 7.9 Hz, 1H), 7.92 – 7.78 (m, 4H), 7.74 (d, *J* = 8.4 Hz, 1H), 7.68 – 7.62 (m, 1H), 7.47 (t, *J* = 7.6 Hz, 1H), 7.33 (t, *J* = 7.5 Hz, 1H), 7.24 (d, *J* = 8.9 Hz, 1H), 7.05 (d, *J* = 6.4 Hz, 2H), 6.89 (d, *J* = 5.7 Hz, 1H), 2.21 (s, 3H).

**<sup>13</sup>C NMR** (100 MHz, Acetone-*d*<sub>6</sub>): δ 154.8, 150.0, 149.0, 144.9, 134.2, 134.0, 134.0, 133.4, 133.3, 132.9, 130.5, 129.2, 128.6, 128.5, 128.2, 126.6, 125.2, 124.4, 124.3, 123.5, 119.2, 114.1, 106.5, 18.2.

**HRMS (ESI):** C<sub>26</sub>H<sub>17</sub>BrClNO<sub>2</sub>+H, Calc: 490.0192, Found: 490.0204.

**Optical Rotation:** [α]<sub>D</sub><sup>20</sup> = +56° (*c* = 1, acetone).

**IR (KBr, cm<sup>-1</sup>):** 2973, 1654, 1513, 1433, 1277, 1195, 1071, 975, 819.

**HPLC analysis:** Chiralcel IC-H (Hexane/*i*-PrOH = 95:5, flow rate = 1.0 mL/min,  $t_R$  = 7.517min (minor),  $t_R$  = 13.047 min (major).

**(*R<sub>a</sub>*)-1-(4-bromo-1-(mesitylimino)-1*H*-isochromen-3-yl)naphthalen-2-ol (5l)**

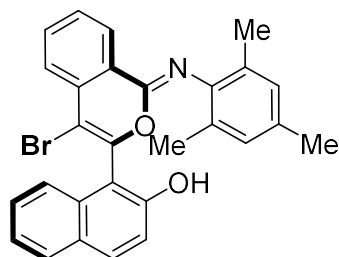

**Appearance:** white solid.

**Yield:** 90%, 21.8 mg.

**<sup>1</sup>H NMR** (400 MHz, Acetone-*d*<sub>6</sub>): δ 9.07 (s, 1H), 8.56 (d,  $J$  = 7.9 Hz, 1H), 7.93 – 7.78 (m, 4H), 7.73 – 7.62 (m, 2H), 7.46 (t,  $J$  = 8.4 Hz, 1H), 7.33 (t,  $J$  = 8.1 Hz, 1H), 7.20 (d,  $J$  = 9.0 Hz, 1H), 6.63 (s, 2H), 2.08 (s, 6H), 2.03 (s, 3H).

**<sup>13</sup>C NMR** (100 MHz, Acetone-*d*<sub>6</sub>): δ 154.6, 149.3, 148.9, 143.0, 134.0, 133.8, 133.4, 132.7, 132.2, 130.3, 129.2, 129.2, 129.0, 128.6, 128.2, 128.0, 126.5, 125.0, 124.3, 124.2, 119.2, 114.4, 106.2, 20.7, 18.4.

**HRMS (ESI):** C<sub>28</sub>H<sub>22</sub>BrNO<sub>2</sub>+H, Calc: 484.0898, Found: 484.0797.

**Optical Rotation:**  $[\alpha]_D^{20}$  = +32° ( $c$  = 1, acetone).

**IR (KBr, cm<sup>-1</sup>):** 2969, 1656, 1621, 1433, 1276, 1196, 1069, 977, 760.

**HPLC analysis:** Chiralcel IC-H (Hexane/*i*-PrOH = 95:5, flow rate = 1.0 mL/min,  $t_R$  = 4.520 min (minor),  $t_R$  = 7.440 min (major).

**(*R<sub>a</sub>*)-1-(4-bromo-7-chloro-1-(phenylimino)-1*H*-isochromen-3-yl)naphthalen-2-ol (5m)**

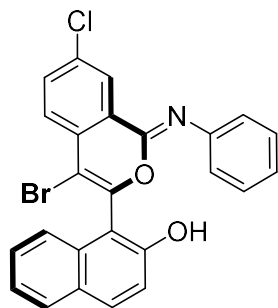

**Appearance:** white solid.

**Yield:** 99%, 23.4 mg.

**<sup>1</sup>H NMR** (400 MHz, Acetone-*d*<sub>6</sub>): δ 9.32 (s, 1H), 8.42 (d,  $J$  = 2.2 Hz, 1H), 7.91 (d,  $J$  = 8.9 Hz, 1H), 7.87 – 7.77 (m, 4H), 7.51 – 7.45 (m, 1H), 7.37 – 7.31 (m, 2H), 7.21 (d,  $J$  = 9.8 Hz, 2H), 7.13 (t,  $J$  = 7.9 Hz, 2H), 6.96 – 6.88 (m, 1H).

**<sup>13</sup>C NMR** (100 MHz, Acetone-*d*<sub>6</sub>): δ 154.9, 149.4, 148.4, 146.4, 135.6, 133.8, 133.4, 133.0, 132.8, 129.4, 129.2, 129.2, 128.7, 128.3, 127.6, 127.2, 125.0, 124.5, 124.4, 123.9, 119.4, 113.9.

**HRMS (ESI):** C<sub>25</sub>H<sub>15</sub>BrClNO<sub>2</sub>+H, Calc: 476.0028, Found: 476.0047.

**Optical Rotation:**  $[\alpha]_D^{20}$  = +104° ( $c$  = 1, acetone).

**IR (KBr, cm<sup>-1</sup>):** 2989, 1651, 1583, 1471, 1278, 1192, 1066, 975, 817.

**HPLC analysis:** Chiralcel IC-H (Hexane/*i*-PrOH = 95:5, flow rate = 1.0 mL/min,  $t_R$  = 4.633 min (minor),  $t_R$  = 6.537 min (major).

**(*R<sub>a</sub>*)-1-(4-bromo-7-methyl-1-(phenylimino)-1*H*-isochromen-3-yl)naphthalen-2-ol (5n)**

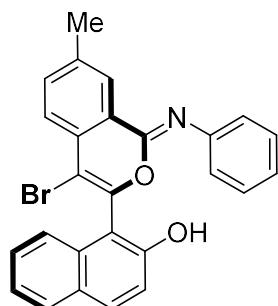

**Appearance:** white solid.

**Yield:** 98%, 22.3 mg.

**<sup>1</sup>H NMR** (400 MHz, Acetone-*d*<sub>6</sub>): δ 9.11 (s, 1H), 8.30 (s, 1H), 7.91 (d, *J* = 9.0 Hz, 1H), 7.84 (d, *J* = 8.2 Hz, 1H), 7.74 (dd, *J* = 18.0, 8.4 Hz, 2H), 7.62 (d, *J* = 8.6 Hz, 1H), 7.49 (t, *J* = 8.0 Hz, 1H), 7.35 (s, 1H), 7.27 (d, *J* = 9.0 Hz, 1H), 7.23 – 7.05 (m, 4H), 6.88 (s, 1H), 2.59 (s, 3H).

**<sup>13</sup>C NMR** (100 MHz, Acetone-*d*<sub>6</sub>): δ 154.7, 149.7, 147.8, 147.0, 140.8, 134.9, 133.6, 132.8, 131.5, 129.3, 129.3, 129.2, 128.4, 128.2, 126.6, 125.4, 124.5, 124.5, 124.4, 123.7, 119.3, 114.2, 106.6, 21.4.

**HRMS (ESI):** C<sub>25</sub>H<sub>16</sub>BrNO<sub>2</sub>+H, Calc: 456.0594, Found: 456.0594.

**Optical Rotation:**  $[\alpha]_D^{20}$  = +122° (*c* = 1, acetone).

**IR (KBr, cm<sup>-1</sup>):** 3071, 1724, 1652, 1584, 1514, 1208, 1046, 974, 818.

**HPLC analysis:** Chiralcel IC-H (Hexane/*i*-PrOH = 95:5, flow rate = 1.0 mL/min,  $t_R$  = 5.590 min (minor),  $t_R$  = 9.920 min (major).

**(*R<sub>a</sub>*)-1-(4-bromo-7-methoxy-1-(phenylimino)-1*H*-isochromen-3-yl)naphthalen-2-ol (5o)**

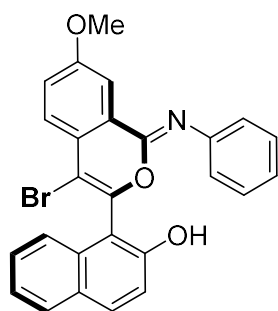

**Appearance:** white solid.

**Yield:** 74%, 17.5 mg.

**<sup>1</sup>H NMR** (400 MHz, Acetone-*d*<sub>6</sub>): δ 9.11 (s, 1H), 8.30 (s, 1H), 7.91 (d, *J* = 9.0 Hz, 1H), 7.84 (d, *J* = 8.2 Hz, 1H), 7.74 (dd, *J* = 18.0, 8.4 Hz, 2H), 7.62 (d, *J* = 8.6 Hz, 1H), 7.49 (t, *J* = 8.0 Hz, 1H), 7.35 (s, 1H), 7.27 (d, *J* = 9.0 Hz, 1H), 7.23 – 7.05 (m, 4H), 6.88 (s, 1H), 2.59 (s, 3H).

**<sup>13</sup>C NMR** (100 MHz, Acetone-*d*<sub>6</sub>): δ 169.4, 161.6, 154.8, 149.7, 147.0, 146.3, 135.1, 134.1, 133.7, 132.8, 129.3, 129.3, 129.2, 128.5, 128.2, 127.3, 127.0, 124.6, 124.5, 124.4, 119.3, 114.2, 110.8, 106.4, 56.3.

**HRMS (ESI):** C<sub>26</sub>H<sub>18</sub>BrNO<sub>2</sub>+H, Calc: 472.0505, Found: 472.0543.



**Optical Rotation:**  $[\alpha]_{\text{D}}^{20} = +87^{\circ}$  ( $c = 1$ , acetone).

**IR (KBr,  $\text{cm}^{-1}$ ):** 3071, 1724, 1652, 1514, 1279, 1208, 1046, 974, 818.

**HPLC analysis:** Chiralcel IC-H (Hexane/*i*-PrOH = 95:5, flow rate = 1.0 mL/min,  $t_{\text{R}} = 8.033$  min (minor),  $t_{\text{R}} = 14.350$  min (major).

**(*R*<sub>a</sub>)-1-(4-bromo-1-(phenylimino)-1*H*-isochromen-3-yl)-7-phenylnaphthalen-2-ol (5p)**

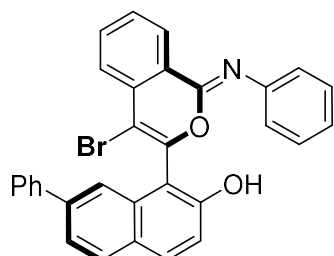

**Appearance:** white solid.

**Yield:** 91%, 23.6 mg.

**<sup>1</sup>H NMR** (400 MHz, Acetone-*d*<sub>6</sub>):  $\delta$  9.23 (s, 1H), 8.47 (d,  $J = 8.1$  Hz, 1H), 8.01 (s, 1H), 7.95 (dd,  $J = 8.7, 2.6$  Hz, 2H), 7.85 – 7.77 (m, 2H), 7.66 (t,  $J = 6.8$  Hz, 4H), 7.44 – 7.38 (m, 2H), 7.35 – 7.27 (m, 2H), 7.18 (d,  $J = 8.3$  Hz, 2H), 7.09 (t,  $J = 7.8$  Hz, 2H), 6.94 – 6.81 (m, 1H).

**<sup>13</sup>C NMR** (100 MHz, Acetone-*d*<sub>6</sub>):  $\delta$  155.3, 149.7, 148.7, 146.9, 142.0, 141.0, 134.0, 134.0, 133.7, 132.8, 130.4, 130.0, 129.8, 129.6, 129.4, 128.5, 128.4, 128.3, 128.3, 126.7, 124.6, 124.0, 123.7, 122.4, 119.4, 114.5, 106.8.

**HRMS (ESI):** C<sub>31</sub>H<sub>20</sub>BrNO<sub>2</sub>+H, Calc: 518.0721, Found: 518.0750.

**Optical Rotation:**  $[\alpha]_{\text{D}}^{20} = +30^{\circ}$  ( $c = 1$ , acetone).

**IR (KBr,  $\text{cm}^{-1}$ ):** 2989, 1648, 1589, 1497, 1333, 1249, 1195, 1075, 955.

**HPLC analysis:** Chiralcel IC-H (Hexane/*i*-PrOH = 95:5, flow rate = 1.0 mL/min,  $t_{\text{R}} = 5.473$  min (minor),  $t_{\text{R}} = 7.747$  min (major)

**(*R*<sub>a</sub>)-1-(4-bromo-1-(phenylimino)-1*H*-isochromen-3-yl)-6-phenylnaphthalen-2-ol (5q)**

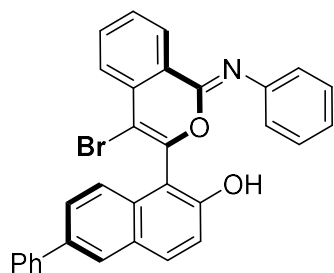

**Appearance:** white solid.

**Yield:** 86%, 22.3 mg.

**<sup>1</sup>H NMR** (400 MHz, Acetone-*d*<sub>6</sub>):  $\delta$  9.26 (s, 1H), 8.48 (d,  $J = 7.3$  Hz, 1H), 8.14 (s, 1H), 8.01 (d,  $J = 8.9$  Hz, 1H), 7.91 – 7.81 (m, 4H), 7.77 (dd,  $J = 7.1, 1.5$  Hz, 2H), 7.67 (t,  $J = 8.3$  Hz, 1H), 7.48 (t,  $J = 7.7$  Hz, 2H), 7.36 (t,  $J = 7.3$  Hz, 1H), 7.30 (d,  $J = 8.9$  Hz, 1H), 7.19 (d,  $J = 8.3$  Hz, 2H), 7.12 (t,  $J = 7.9$  Hz, 2H), 6.93 – 6.84 (m, 1H).

**<sup>13</sup>C NMR** (100 MHz, Acetone-*d*<sub>6</sub>):  $\delta$  154.9, 149.5, 148.7, 147.0, 142.0, 137.0, 134.0, 133.3, 132.7, 130.4, 129.9, 129.6, 129.4, 128.4, 128.2, 127.9, 127.6, 126.9, 126.7, 125.8, 125.3, 124.6, 123.7, 119.8, 115.4, 114.2, 106.6.

**HRMS (ESI):** C<sub>31</sub>H<sub>20</sub>BrNO<sub>2</sub>+H, Calc: 518.0741, Found: 518.0750.

**Optical Rotation:**  $[\alpha]_{\text{D}}^{20} = +37^{\circ}$  ( $c = 1$ , acetone).

**IR (KBr, cm<sup>-1</sup>):** 2923, 1652, 1587, 1489, 1445, 1198, 1039, 948, 832.

**HPLC analysis:** Chiralcel IC-H (Hexane/*i*-PrOH = 95:5, flow rate = 1.0 mL/min,  $t_{\text{R}} = 5.773$  min (minor),  $t_{\text{R}} = 8.017$  min (major)).

### General procedure and spectral data for the synthesis of **6**

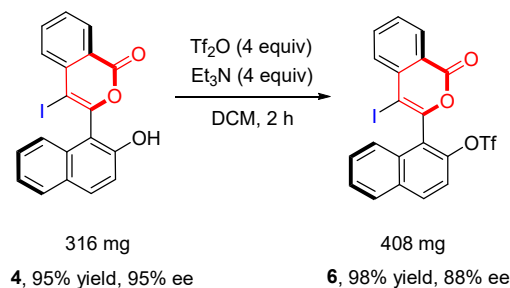

To a solution of **4** (316 mg) and Et<sub>3</sub>N (4 equiv) in DCM (10 mL) was added Tf<sub>2</sub>O (4 equiv) slowly at room temperature. Then the reaction mixture was stirred for 2 h at room temperature. After the reaction performed completely, the solvent was removed under vacuum and residue was purified by flash column chromatography (petroleum ether/EA 1:15) to give the pure desired product **6** (408 mg, 98% yield) as a white solid.

### Spectral data for axially chiral isocoumarin **6**

#### (*R*)-1-(4-iodo-1-oxo-1H-isochromen-3-yl)naphthalen-2-yl trifluoromethanesulfonate (**6**)

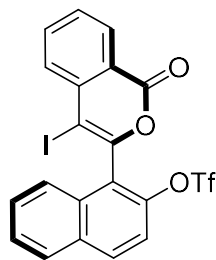

**Appearance:** white solid.

**Yield:** 98%, 408 mg.

**<sup>1</sup>H NMR** (400 MHz, Acetone-*d*<sub>6</sub>):  $\delta$  8.39 (d,  $J = 9.2$  Hz, 1H), 8.34 (d,  $J = 7.8$  Hz, 1H), 8.20 – 8.14 (m, 1H), 8.12 – 8.01 (m, 2H), 7.95 (d,  $J = 7.9$  Hz, 1H), 7.81 (t,  $J = 7.6$  Hz, 1H), 7.79 – 7.66 (m, 3H).

**<sup>13</sup>C NMR** (100 MHz, Acetone-*d*<sub>6</sub>):  $\delta$  161.4, 149.4, 145.8, 138.2, 137.1, 134.5, 133.6, 132.4, 132.1, 131.4, 130.6, 130.0, 129.7, 128.9, 127.0, 126.7, 121.8, 120.2, 117.8, 83.6.

**HRMS (ESI):** C<sub>20</sub>H<sub>10</sub>F<sub>3</sub>IO<sub>5</sub>S+H, Calc: 546.9351, Found: 546.9319.

**Optical Rotation:**  $[\alpha]_{\text{D}}^{20} = +51^{\circ}$  ( $c = 1$ , acetone).

**IR (KBr, cm<sup>-1</sup>):** 3104, 1784, 1677, 1564, 1235, 1002, 987, 853, 801.

**HPLC analysis:** Chiralcel IG-H (Hexane/*i*-PrOH = 8:2, flow rate = 1.0 mL/min,  $t_{\text{R}} = 8.793$  min (minor),  $t_{\text{R}} = 11.707$  min (major)).

**2-(2-(methoxymethoxy)naphthalen-1-yl)ethynyl)-N-phenylbenzamide (7)**

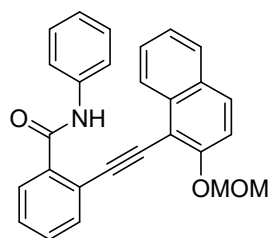

<sup>1</sup>H NMR (400 MHz, CDCl<sub>3</sub>): δ 9.51 (s, 1H), 8.25 (dd, *J* = 15.0, 7.8 Hz, 2H), 7.89 – 7.77 (m, 3H), 7.62 (d, *J* = 8.2 Hz, 2H), 7.53 (p, *J* = 7.5 Hz, 2H), 7.43 (p, *J* = 8.3, 7.6 Hz, 3H), 7.28 (q, *J* = 7.2 Hz, 2H), 7.11 (t, *J* = 7.5 Hz, 1H), 4.99 (s, 2H), 3.33 (s, 3H), 0.80 (d, *J* = 643.7 Hz, 26H).

<sup>13</sup>C NMR (100 MHz, CDCl<sub>3</sub>): δ 164.5, 157.4, 138.0, 135.1, 134.2, 133.8, 131.2, 131.0, 130.6, 129.1, 129.0, 129.0, 128.3, 127.7, 125.1, 124.9, 124.7, 121.3, 120.2, 115.7, 106.5, 96.4, 94.9, 91.7, 56.2.

IR (KBr, cm<sup>-1</sup>): 3324, 3221, 1654, 1508, 1328, 1200, 831, 743, 621.

HRMS (ESI): C<sub>27</sub>H<sub>21</sub>NO<sub>3</sub>+H, Calc: 408.1611, Found: 408.1594.

**4-iodo-3-(2-(methoxymethoxy)naphthalen-1-yl)-N-phenyl-1H-isochromen-1-imine (8)**

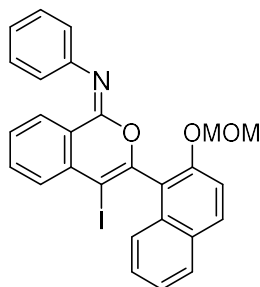

**Appearance:** yellow solid.

**Yield:** 98%, 26.1 mg

<sup>1</sup>H NMR (400 MHz, Acetone-*d*<sub>6</sub>): δ 8.42 (d, *J* = 7.2 Hz, 1H), 8.01 (d, *J* = 9.0 Hz, 1H), 7.89 (d, *J* = 8.2 Hz, 1H), 7.82 (d, *J* = 7.7 Hz, 1H), 7.78 – 7.69 (m, 2H), 7.61 (t, *J* = 8.3 Hz, 1H), 7.53 (dd, *J* = 14.2, 8.8 Hz, 2H), 7.41 (t, *J* = 7.5 Hz, 1H), 7.17 – 7.00 (m, 4H), 6.94 – 6.79 (m, 1H), 5.42 – 5.16 (m, 2H), 3.37 (s, 3H).

<sup>13</sup>C NMR (100 MHz, Acetone-*d*<sub>6</sub>): δ 154.3, 151.9, 149.7, 147.1, 135.4, 134.3, 133.0, 132.8, 131.4, 130.5, 130.2, 129.4, 129.2, 128.5, 125.4, 124.9, 124.5, 123.6, 121.0, 116.9, 95.7, 81.7, 56.6.

IR (KBr, cm<sup>-1</sup>): 3114, 1712, 1498, 1488, 1398, 1198, 987, 888, 798.

HRMS (ESI): C<sub>27</sub>H<sub>20</sub>INO<sub>2</sub>+H, Calc: 534.0581, Found: 534.0561.

## X-ray Structure of 3a

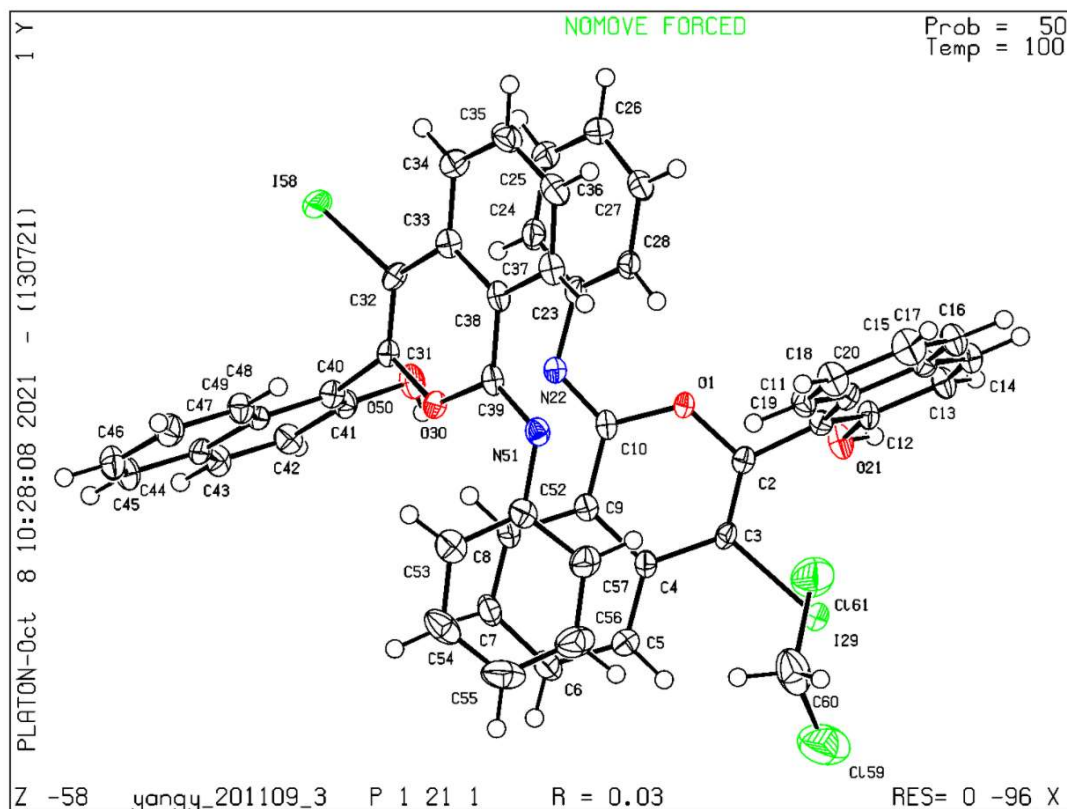

|                                     |                                                                                              |                                                                                              |              |
|-------------------------------------|----------------------------------------------------------------------------------------------|----------------------------------------------------------------------------------------------|--------------|
| Bond precision:                     | C-C = 0.0070 Å                                                                               | Wavelength=1.54184                                                                           |              |
| Cell:                               | a=10.4688(1)                                                                                 | b=15.0424(1)                                                                                 | c=14.4588(1) |
|                                     | alpha=90                                                                                     | beta=104.344(1)                                                                              | gamma=90     |
| Temperature: 100 K                  |                                                                                              |                                                                                              |              |
|                                     | Calculated                                                                                   | Reported                                                                                     |              |
| Volume                              | 2205.93(3)                                                                                   | 2205.93(3)                                                                                   |              |
| Space group                         | P 21                                                                                         | P 1 21 1                                                                                     |              |
| Hall group                          | P 2yb                                                                                        | P 2yb                                                                                        |              |
| Moiety formula                      | 2(C <sub>25</sub> H <sub>16</sub> I N O <sub>2</sub> ), C H <sub>2</sub> Cl <sub>2</sub>     | 2(C <sub>25</sub> H <sub>16</sub> I N O <sub>2</sub> ), C H <sub>2</sub> Cl <sub>2</sub>     |              |
| Sum formula                         | C <sub>51</sub> H <sub>34</sub> Cl <sub>2</sub> I <sub>2</sub> N <sub>2</sub> O <sub>4</sub> | C <sub>51</sub> H <sub>34</sub> Cl <sub>2</sub> I <sub>2</sub> N <sub>2</sub> O <sub>4</sub> |              |
| Mr                                  | 1063.50                                                                                      | 1063.50                                                                                      |              |
| D <sub>x</sub> , g cm <sup>-3</sup> | 1.601                                                                                        | 1.601                                                                                        |              |
| Z                                   | 2                                                                                            | 2                                                                                            |              |
| Mu (mm <sup>-1</sup> )              | 12.698                                                                                       | 12.698                                                                                       |              |
| F <sub>000</sub>                    | 1052.0                                                                                       | 1052.0                                                                                       |              |
| F <sub>000</sub> '                  | 1054.88                                                                                      |                                                                                              |              |
| h,k,l <sub>max</sub>                | 13,18,18                                                                                     | 13,18,18                                                                                     |              |
| N <sub>ref</sub>                    | 9302[ 4835]                                                                                  | 8565                                                                                         |              |

Tmin,Tmax 0.427,0.530 0.620,1.000  
 Tmin' 0.295  
 Correction method= # Reported T Limits: Tmin=0.620 Tmax=1.000 AbsCorr =  
 MULTI-SCAN  
 Data completeness= 1.77/0.92 Theta(max)= 76.753  
 R(reflections)= 0.0260( 8348) wR2(reflections)= 0.0698( 8565)  
 S = 1.095 Npar= 551

The following ALERTS were generated. Each ALERT has the format

**test-name\_ALERT\_alert-type\_alert-level.**

Click on the hyperlinks for more details of the test.

**Alert level B**

[PLAT420\\_ALERT\\_2\\_B](#) D-H Bond Without Acceptor O50 --H50 . Please  
 Check

**Alert level C**

[PLAT918\\_ALERT\\_3\\_C](#) Reflection(s) with I(obs) much Smaller I(calc) . 1 Check  
[PLAT934\\_ALERT\\_3\\_C](#) Number of (Iobs-Icalc)/Sigma(W) > 10 Outliers .. 1 Check

**Alert level G**

[PLAT007\\_ALERT\\_5\\_G](#) Number of Unrefined Donor-H Atoms ..... 2 Report  
[PLAT142\\_ALERT\\_4\\_G](#) s.u. on b - Axis Small or Missing ..... 0.00010 Ang.  
[PLAT143\\_ALERT\\_4\\_G](#) s.u. on c - Axis Small or Missing ..... 0.00010 Ang.  
[PLAT912\\_ALERT\\_4\\_G](#) Missing # of FCF Reflections Above STh/L= 0.600 123 Note  
[PLAT978\\_ALERT\\_2\\_G](#) Number C-C Bonds with Positive Residual Density. 3 Info

- 0 **ALERT level A** = Most likely a serious problem - resolve or explain
- 1 **ALERT level B** = A potentially serious problem, consider carefully
- 2 **ALERT level C** = Check. Ensure it is not caused by an omission or oversight
- 5 **ALERT level G** = General information/check it is not something unexpected

- 0 ALERT type 1 CIF construction/syntax error, inconsistent or missing data
- 2 ALERT type 2 Indicator that the structure model may be wrong or deficient
- 2 ALERT type 3 Indicator that the structure quality may be low
- 3 ALERT type 4 Improvement, methodology, query or suggestion
- 1 ALERT type 5 Informative message, check

## References

1. Xu, T.; Chen, K.; Zhu, H. Y.; Hao, W. J.; Tu, S. J.; Jiang, B. Yb(OTf)<sub>3</sub>-Catalyzed Alkyne-Carbonyl Metathesis-Oxa-Michael Addition Relay for Diastereoselective Synthesis of Functionalized Naphtho[2,1-b]furans. *Org. Lett.* **2020**, *22*, 2414-2418.

## Copies of HPLC spectrum

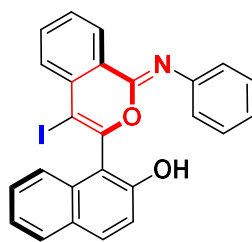

3a

HPLC analysis: Chiralcel IC-H (Hexane/*i*-PrOH = 95:5, flow rate = 1.0 mL/min)

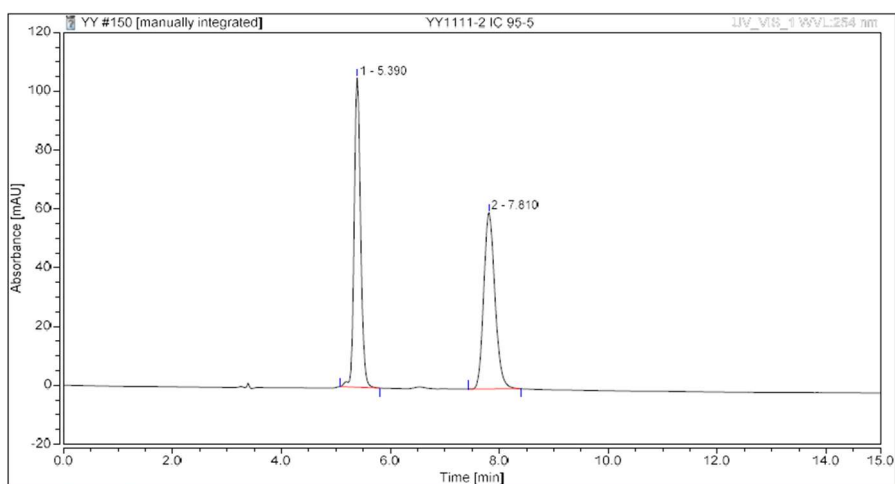

| Integration Results |           |                       |                 |                |                    |                      |        |
|---------------------|-----------|-----------------------|-----------------|----------------|--------------------|----------------------|--------|
| No.                 | Peak Name | Retention Time<br>min | Area<br>mAU*min | Height<br>mAU  | Relative Area<br>% | Relative Height<br>% | Amount |
| 1                   |           | 5.390                 | 14.326          | 105.221        | 49.99              | 63.68                | n.a.   |
| 2                   |           | 7.810                 | 14.334          | 60.021         | 50.01              | 36.32                | n.a.   |
| <b>Total:</b>       |           |                       | <b>28.659</b>   | <b>165.243</b> | <b>100.00</b>      | <b>100.00</b>        |        |

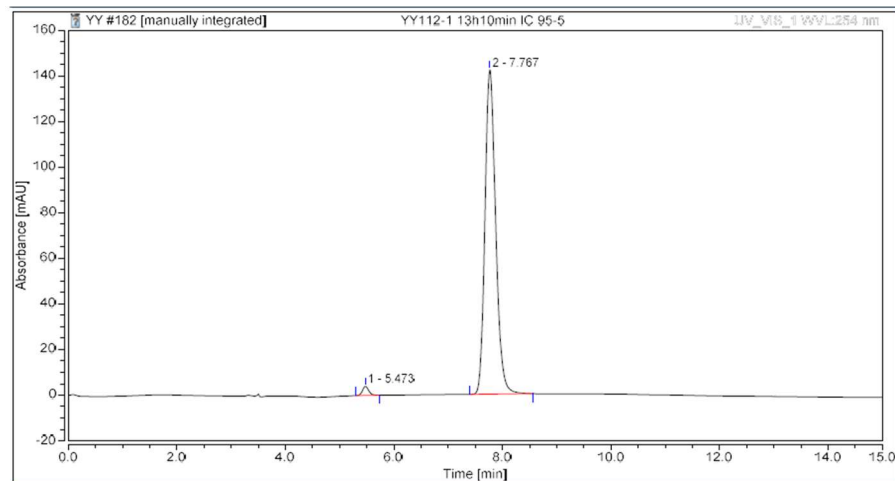

| Integration Results |           |                       |                 |                |                    |                      |        |
|---------------------|-----------|-----------------------|-----------------|----------------|--------------------|----------------------|--------|
| No.                 | Peak Name | Retention Time<br>min | Area<br>mAU*min | Height<br>mAU  | Relative Area<br>% | Relative Height<br>% | Amount |
| 1                   |           | 5.473                 | 0.522           | 3.995          | 1.58               | 2.73                 | n.a.   |
| 2                   |           | 7.767                 | 32.501          | 142.259        | 98.42              | 97.27                | n.a.   |
| <b>Total:</b>       |           |                       | <b>33.023</b>   | <b>146.253</b> | <b>100.00</b>      | <b>100.00</b>        |        |

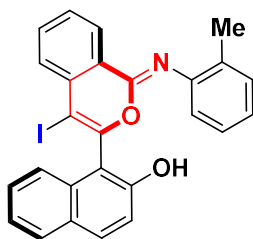

**3b**

**HPLC analysis:** Chiralcel IC-H (Hexane/*i*-PrOH = 95:5, flow rate = 1.0 mL/min)

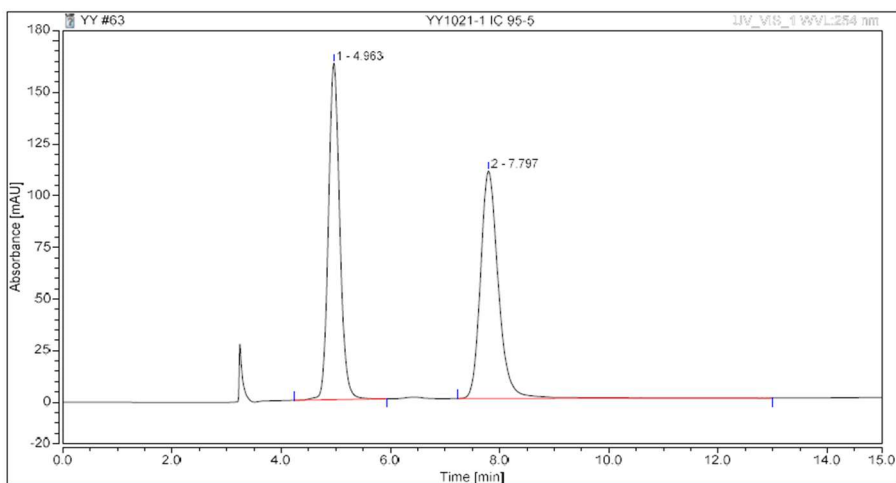

| Integration Results |           |                       |                 |                |                    |                      |                |
|---------------------|-----------|-----------------------|-----------------|----------------|--------------------|----------------------|----------------|
| No.                 | Peak Name | Retention Time<br>min | Area<br>mAU*min | Height<br>mAU  | Relative Area<br>% | Relative Height<br>% | Amount<br>n.a. |
| 1                   |           | 4.963                 | 39.151          | 162.985        | 48.26              | 59.66                | n.a.           |
| 2                   |           | 7.797                 | 41.980          | 110.215        | 51.74              | 40.34                | n.a.           |
| <b>Total:</b>       |           |                       | <b>81.131</b>   | <b>273.200</b> | <b>100.00</b>      | <b>100.00</b>        |                |

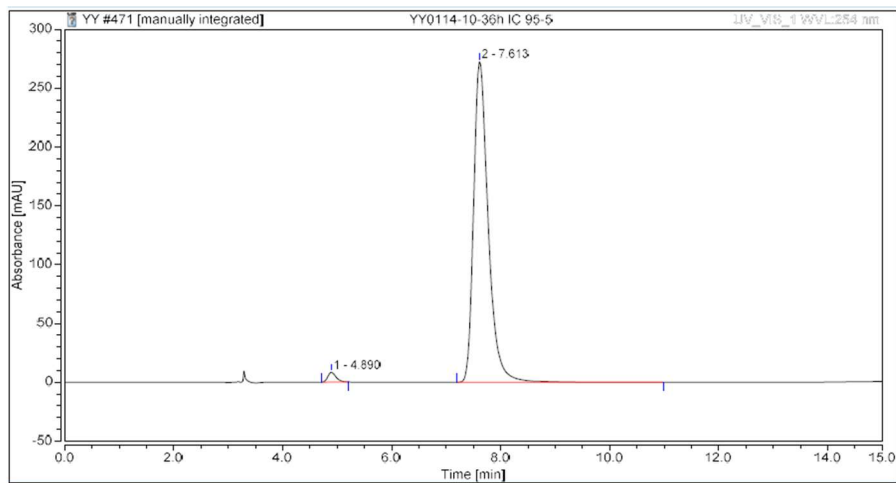

| Integration Results |           |                       |                 |                |                    |                      |                |
|---------------------|-----------|-----------------------|-----------------|----------------|--------------------|----------------------|----------------|
| No.                 | Peak Name | Retention Time<br>min | Area<br>mAU*min | Height<br>mAU  | Relative Area<br>% | Relative Height<br>% | Amount<br>n.a. |
| 1                   |           | 4.890                 | 1.474           | 8.445          | 1.71               | 3.01                 | n.a.           |
| 2                   |           | 7.613                 | 84.733          | 272.408        | 98.29              | 96.99                | n.a.           |
| <b>Total:</b>       |           |                       | <b>86.207</b>   | <b>280.853</b> | <b>100.00</b>      | <b>100.00</b>        |                |



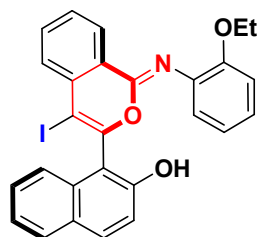

**3c**

**HPLC analysis:** Chiralcel IC-H (Hexane/*i*-PrOH = 95:5, flow rate = 1.0 mL/min)

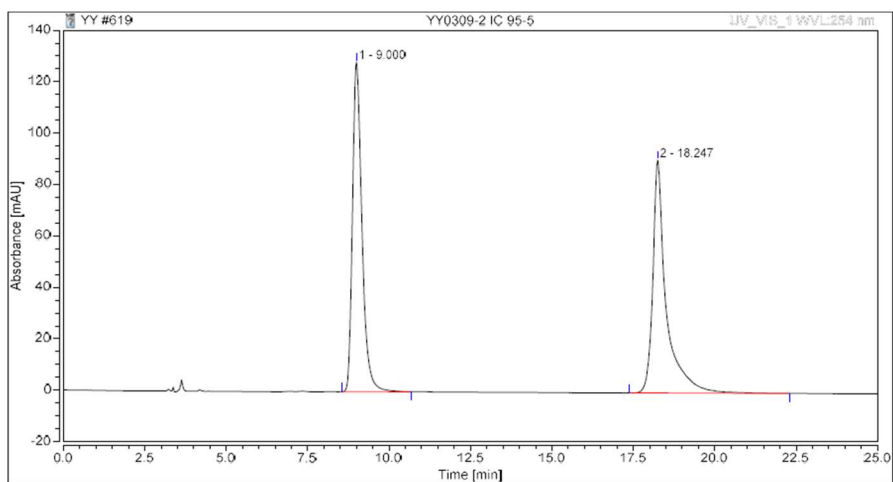

| Integration Results |           |                    |               |                |                 |                   |        |
|---------------------|-----------|--------------------|---------------|----------------|-----------------|-------------------|--------|
| No.                 | Peak Name | Retention Time min | Area mAU*min  | Height mAU     | Relative Area % | Relative Height % | Amount |
| 1                   |           | 9.000              | 43.213        | 128.282        | 50.00           | 58.59             | n.a.   |
| 2                   |           | 18.247             | 43.214        | 90.670         | 50.00           | 41.41             | n.a.   |
| <b>Total:</b>       |           |                    | <b>86.427</b> | <b>218.951</b> | <b>100.00</b>   | <b>100.00</b>     |        |

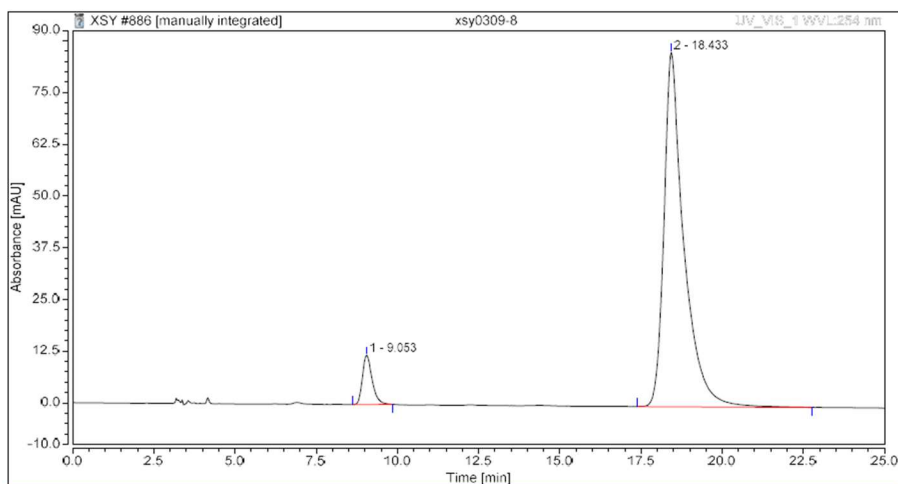

| Integration Results |           |                    |               |               |                 |                   |        |
|---------------------|-----------|--------------------|---------------|---------------|-----------------|-------------------|--------|
| No.                 | Peak Name | Retention Time min | Area mAU*min  | Height mAU    | Relative Area % | Relative Height % | Amount |
| 1                   |           | 9.053              | 4.117         | 11.920        | 6.33            | 12.22             | n.a.   |
| 2                   |           | 18.433             | 60.909        | 85.642        | 93.67           | 87.78             | n.a.   |
| <b>Total:</b>       |           |                    | <b>65.026</b> | <b>97.562</b> | <b>100.00</b>   | <b>100.00</b>     |        |

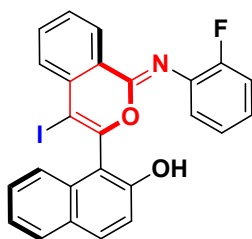

**3d**

**HPLC analysis:** Chiralcel IC-H (Hexane/*i*-PrOH = 95:5, flow rate = 1.0 mL/min)

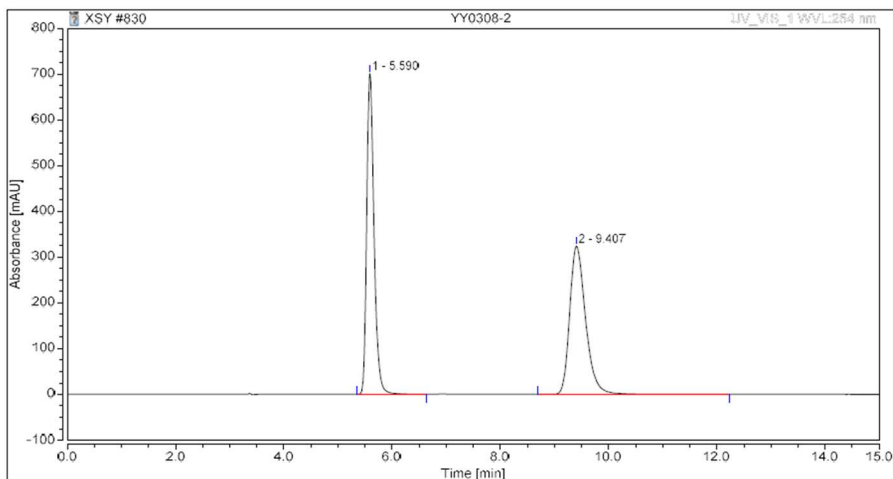

| Integration Results |           |                       |                 |                 |                    |                      |                |
|---------------------|-----------|-----------------------|-----------------|-----------------|--------------------|----------------------|----------------|
| No.                 | Peak Name | Retention Time<br>min | Area<br>mAU*min | Height<br>mAU   | Relative Area<br>% | Relative Height<br>% | Amount<br>n.a. |
| 1                   |           | 5.590                 | 109.740         | 701.100         | 49.84              | 68.36                | n.a.           |
| 2                   |           | 9.407                 | 110.436         | 324.542         | 50.16              | 31.64                | n.a.           |
| <b>Total:</b>       |           |                       | <b>220.176</b>  | <b>1025.642</b> | <b>100.00</b>      | <b>100.00</b>        |                |

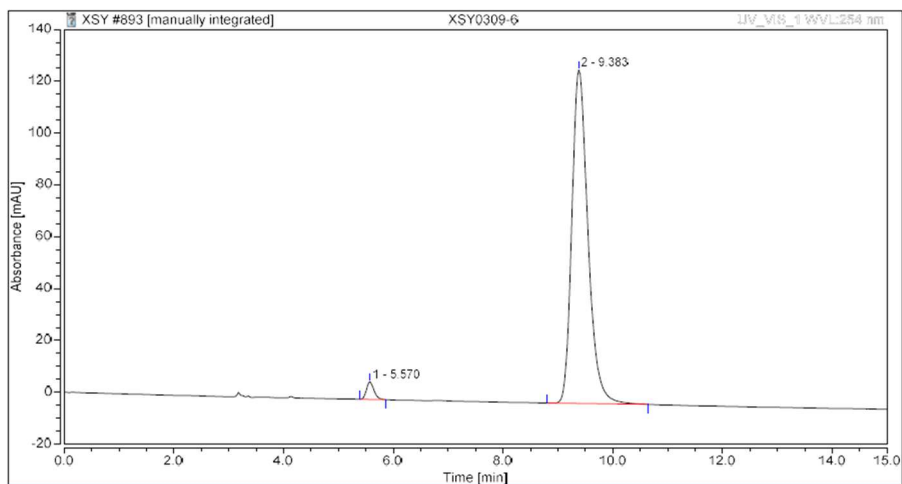

| Integration Results |           |                       |                 |                |                    |                      |                |
|---------------------|-----------|-----------------------|-----------------|----------------|--------------------|----------------------|----------------|
| No.                 | Peak Name | Retention Time<br>min | Area<br>mAU*min | Height<br>mAU  | Relative Area<br>% | Relative Height<br>% | Amount<br>n.a. |
| 1                   |           | 5.570                 | 1.071           | 6.852          | 2.39               | 5.05                 | n.a.           |
| 2                   |           | 9.383                 | 43.793          | 128.840        | 97.61              | 94.95                | n.a.           |
| <b>Total:</b>       |           |                       | <b>44.864</b>   | <b>135.692</b> | <b>100.00</b>      | <b>100.00</b>        |                |

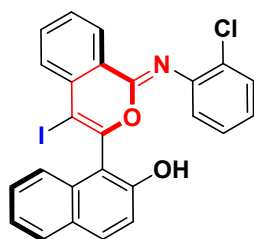

**3e**

**HPLC analysis:** Chiralcel IC-H (Hexane/*i*-PrOH = 95:5, flow rate = 1.0 mL/min)

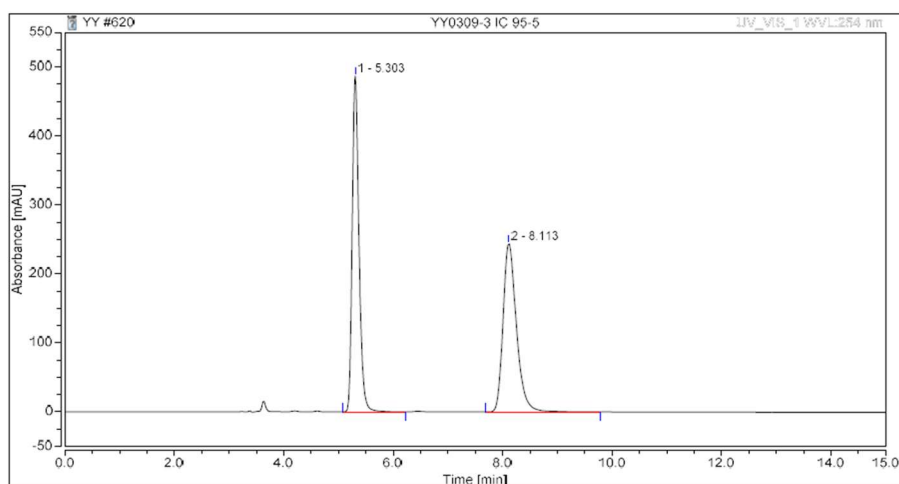

| Integration Results |           |                       |                 |                |                    |                      |                |
|---------------------|-----------|-----------------------|-----------------|----------------|--------------------|----------------------|----------------|
| No.                 | Peak Name | Retention Time<br>min | Area<br>mAU*min | Height<br>mAU  | Relative Area<br>% | Relative Height<br>% | Amount<br>n.a. |
| 1                   |           | 5.303                 | 69.542          | 487.265        | 49.94              | 66.57                | n.a.           |
| 2                   |           | 8.113                 | 69.696          | 244.639        | 50.06              | 33.43                | n.a.           |
| <b>Total:</b>       |           |                       | <b>139.238</b>  | <b>731.905</b> | <b>100.00</b>      | <b>100.00</b>        |                |

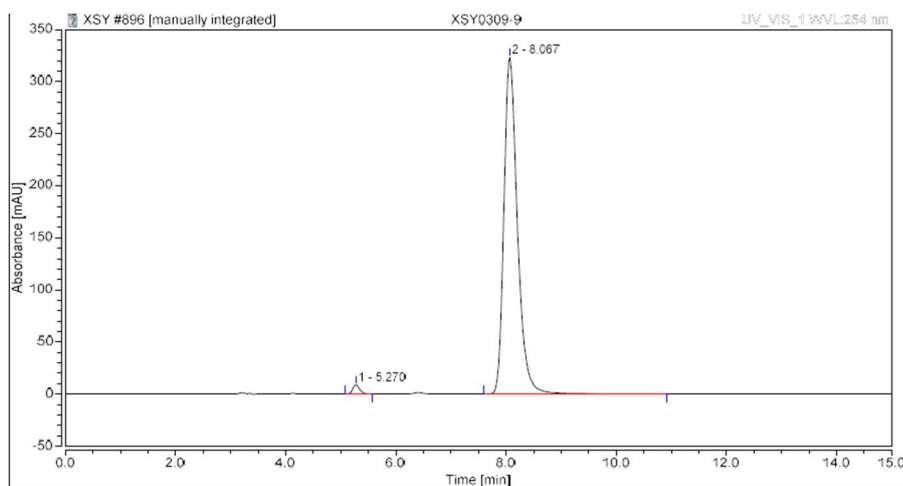

| Integration Results |           |                       |                 |                |                    |                      |                |
|---------------------|-----------|-----------------------|-----------------|----------------|--------------------|----------------------|----------------|
| No.                 | Peak Name | Retention Time<br>min | Area<br>mAU*min | Height<br>mAU  | Relative Area<br>% | Relative Height<br>% | Amount<br>n.a. |
| 1                   |           | 5.270                 | 1.254           | 8.764          | 1.35               | 2.64                 | n.a.           |
| 2                   |           | 8.067                 | 91.901          | 323.212        | 98.65              | 97.36                | n.a.           |
| <b>Total:</b>       |           |                       | <b>93.156</b>   | <b>331.976</b> | <b>100.00</b>      | <b>100.00</b>        |                |

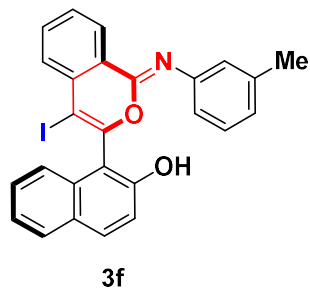

**HPLC analysis:** Chiralcel IC-H (Hexane/*i*-PrOH = 95:5, flow rate = 1.0 mL/min)

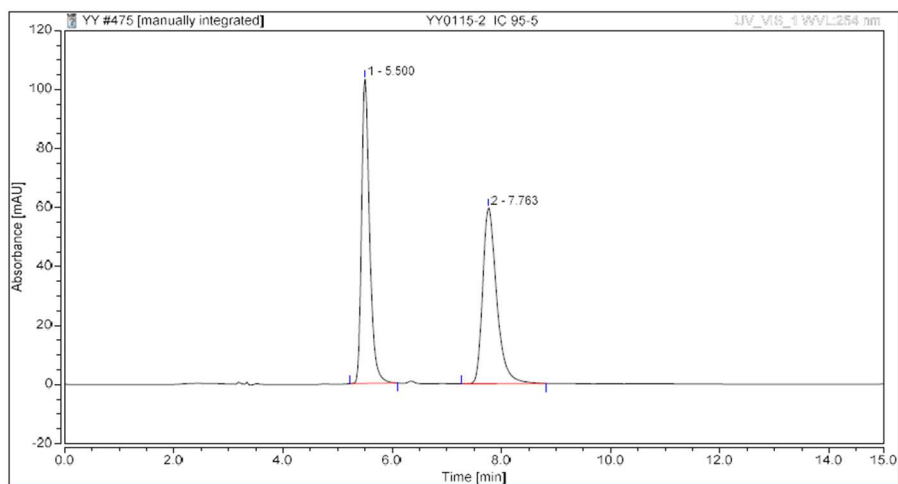

| Integration Results |           |                       |                 |                |                    |                      |                |
|---------------------|-----------|-----------------------|-----------------|----------------|--------------------|----------------------|----------------|
| No.                 | Peak Name | Retention Time<br>min | Area<br>mAU*min | Height<br>mAU  | Relative Area<br>% | Relative Height<br>% | Amount<br>n.a. |
| 1                   |           | 5.500                 | 17.605          | 103.221        | 49.88              | 63.37                | n.a.           |
| 2                   |           | 7.763                 | 17.689          | 59.652         | 50.12              | 36.63                | n.a.           |
| <b>Total:</b>       |           |                       | <b>35.294</b>   | <b>162.873</b> | <b>100.00</b>      | <b>100.00</b>        |                |

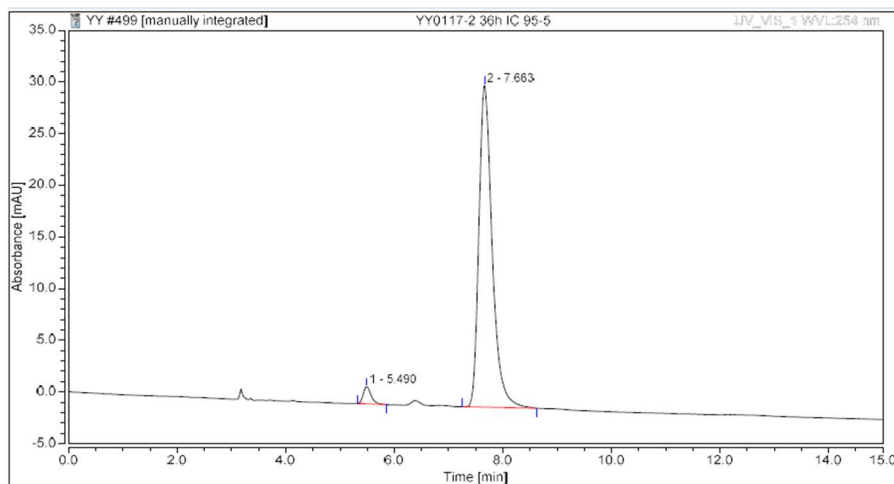

| Integration Results |           |                       |                 |               |                    |                      |                |
|---------------------|-----------|-----------------------|-----------------|---------------|--------------------|----------------------|----------------|
| No.                 | Peak Name | Retention Time<br>min | Area<br>mAU*min | Height<br>mAU | Relative Area<br>% | Relative Height<br>% | Amount<br>n.a. |
| 1                   |           | 5.490                 | 0.278           | 1.669         | 3.05               | 5.08                 | n.a.           |
| 2                   |           | 7.663                 | 8.836           | 31.175        | 96.95              | 94.92                | n.a.           |
| <b>Total:</b>       |           |                       | <b>9.114</b>    | <b>32.844</b> | <b>100.00</b>      | <b>100.00</b>        |                |

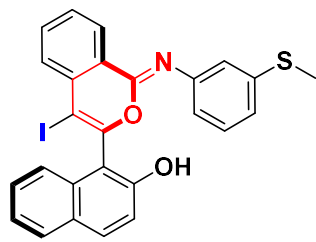

3g

HPLC analysis: Chiralcel IC-H (Hexane/*i*-PrOH = 95:5, flow rate = 1.0 mL/min)

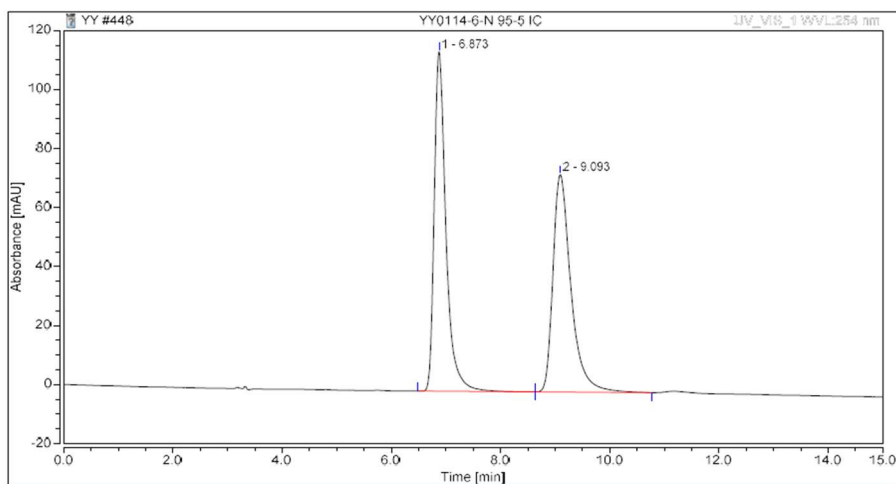

| Integration Results |           |                    |               |                |                 |                   |        |
|---------------------|-----------|--------------------|---------------|----------------|-----------------|-------------------|--------|
| No.                 | Peak Name | Retention Time min | Area mAU*min  | Height mAU     | Relative Area % | Relative Height % | Amount |
| 1                   |           | 6.873              | 28.601        | 115.162        | 50.47           | 60.93             | n.a.   |
| 2                   |           | 9.093              | 28.069        | 73.837         | 49.53           | 39.07             | n.a.   |
| <b>Total:</b>       |           |                    | <b>56.671</b> | <b>189.000</b> | <b>100.00</b>   | <b>100.00</b>     |        |

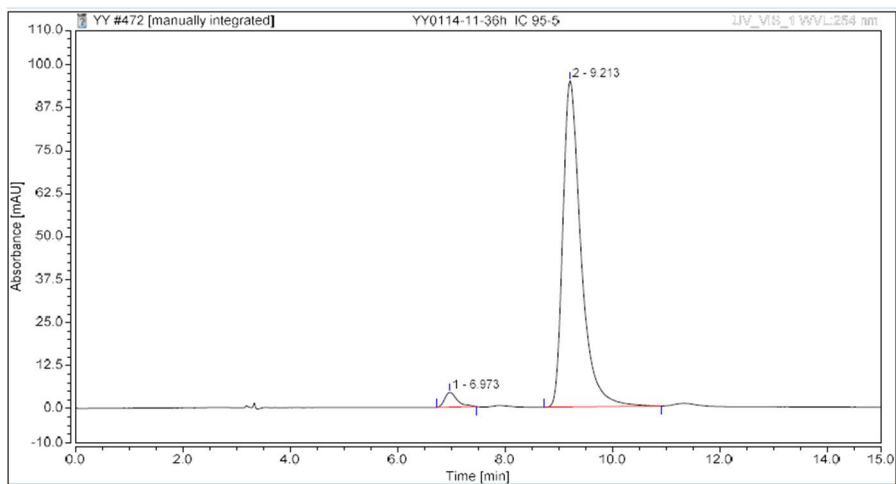

| Integration Results |           |                    |               |               |                 |                   |        |
|---------------------|-----------|--------------------|---------------|---------------|-----------------|-------------------|--------|
| No.                 | Peak Name | Retention Time min | Area mAU*min  | Height mAU    | Relative Area % | Relative Height % | Amount |
| 1                   |           | 6.973              | 1.164         | 4.307         | 3.04            | 4.34              | n.a.   |
| 2                   |           | 9.213              | 37.094        | 95.016        | 96.96           | 95.66             | n.a.   |
| <b>Total:</b>       |           |                    | <b>38.257</b> | <b>99.323</b> | <b>100.00</b>   | <b>100.00</b>     |        |

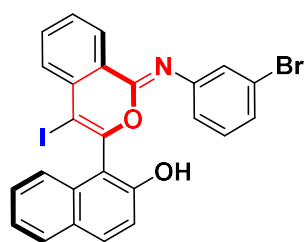

3h

HPLC analysis: Chiralcel IC-H (Hexane/*i*-PrOH = 95:5, flow rate = 1.0 mL/min)

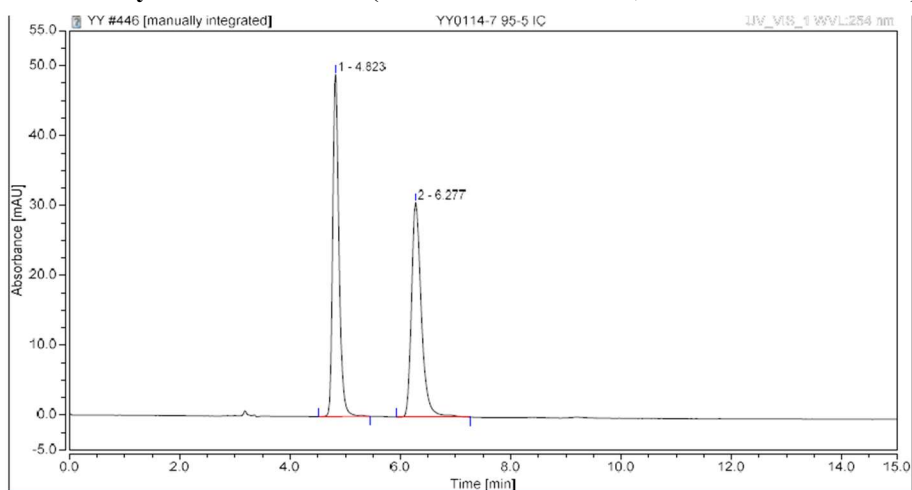

| Integration Results |           |                       |                 |               |                    |                      |                |
|---------------------|-----------|-----------------------|-----------------|---------------|--------------------|----------------------|----------------|
| No.                 | Peak Name | Retention Time<br>min | Area<br>mAU*min | Height<br>mAU | Relative Area<br>% | Relative Height<br>% | Amount<br>n.a. |
| 1                   |           | 4.823                 | 6.380           | 48.997        | 50.10              | 61.46                | n.a.           |
| 2                   |           | 6.277                 | 6.355           | 30.729        | 49.90              | 38.54                | n.a.           |
| <b>Total:</b>       |           |                       | <b>12.736</b>   | <b>79.726</b> | <b>100.00</b>      | <b>100.00</b>        |                |

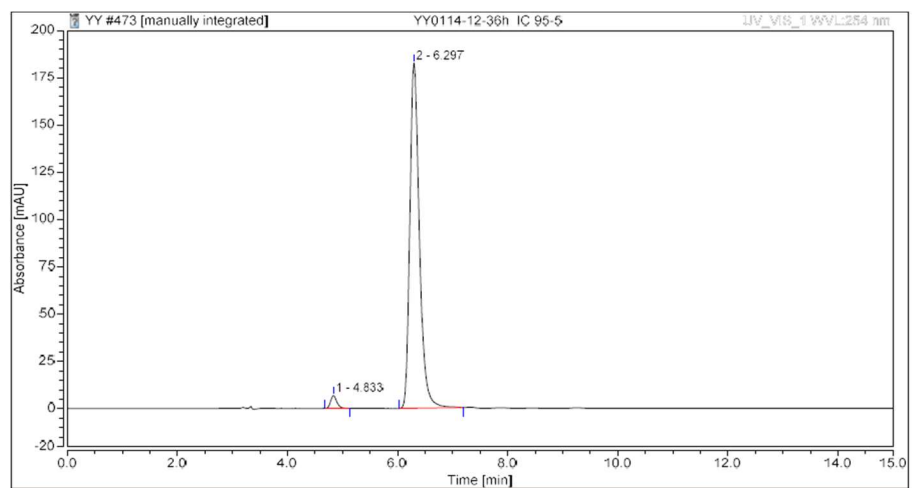

| Integration Results |           |                       |                 |                |                    |                      |                |
|---------------------|-----------|-----------------------|-----------------|----------------|--------------------|----------------------|----------------|
| No.                 | Peak Name | Retention Time<br>min | Area<br>mAU*min | Height<br>mAU  | Relative Area<br>% | Relative Height<br>% | Amount<br>n.a. |
| 1                   |           | 4.833                 | 0.898           | 6.934          | 2.39               | 3.66                 | n.a.           |
| 2                   |           | 6.297                 | 36.750          | 182.733        | 97.61              | 96.34                | n.a.           |
| <b>Total:</b>       |           |                       | <b>37.648</b>   | <b>189.667</b> | <b>100.00</b>      | <b>100.00</b>        |                |

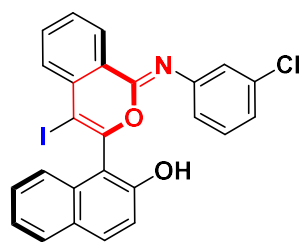

**3i**

**HPLC analysis:** Chiralcel IC-H (Hexane/*i*-PrOH = 95:5, flow rate = 1.0 mL/min)

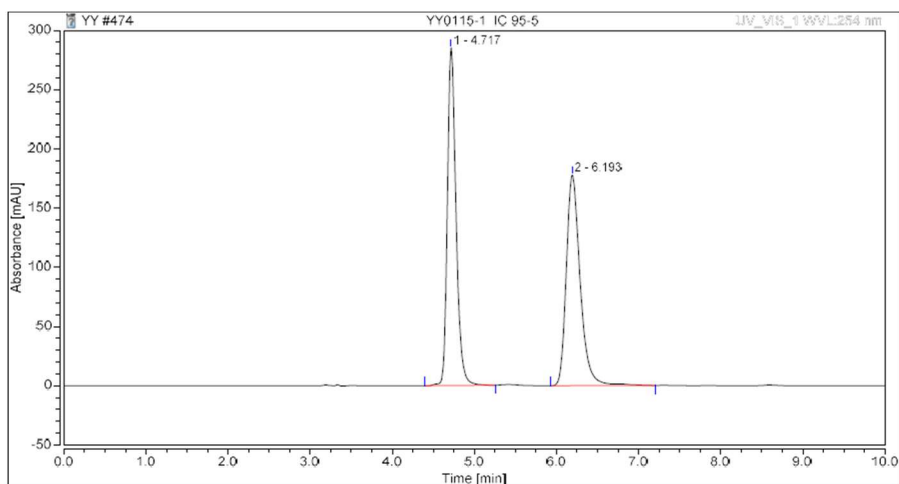

| Integration Results |           |                       |                 |                |                    |                      |                |
|---------------------|-----------|-----------------------|-----------------|----------------|--------------------|----------------------|----------------|
| No.                 | Peak Name | Retention Time<br>min | Area<br>mAU*min | Height<br>mAU  | Relative Area<br>% | Relative Height<br>% | Amount<br>n.a. |
| 1                   |           | 4.717                 | 34.834          | 285.426        | 50.04              | 61.62                | n.a.           |
| 2                   |           | 6.193                 | 34.772          | 177.803        | 49.96              | 38.38                | n.a.           |
| <b>Total:</b>       |           |                       | <b>69.606</b>   | <b>463.229</b> | <b>100.00</b>      | <b>100.00</b>        |                |

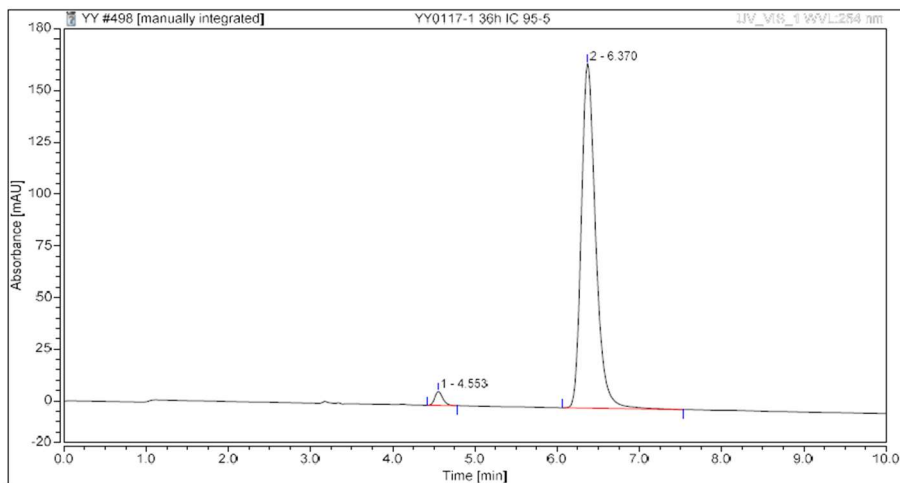

| Integration Results |           |                       |                 |                |                    |                      |                |
|---------------------|-----------|-----------------------|-----------------|----------------|--------------------|----------------------|----------------|
| No.                 | Peak Name | Retention Time<br>min | Area<br>mAU*min | Height<br>mAU  | Relative Area<br>% | Relative Height<br>% | Amount<br>n.a. |
| 1                   |           | 4.553                 | 0.757           | 6.801          | 2.20               | 3.92                 | n.a.           |
| 2                   |           | 6.370                 | 33.646          | 166.701        | 97.80              | 96.08                | n.a.           |
| <b>Total:</b>       |           |                       | <b>34.403</b>   | <b>173.502</b> | <b>100.00</b>      | <b>100.00</b>        |                |

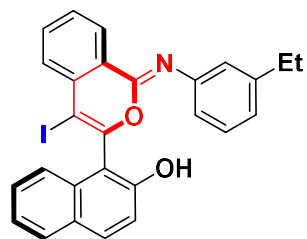

3j

HPLC analysis: Chiralcel IC-H (Hexane/*i*-PrOH = 95:5, flow rate = 1.0 mL/min)

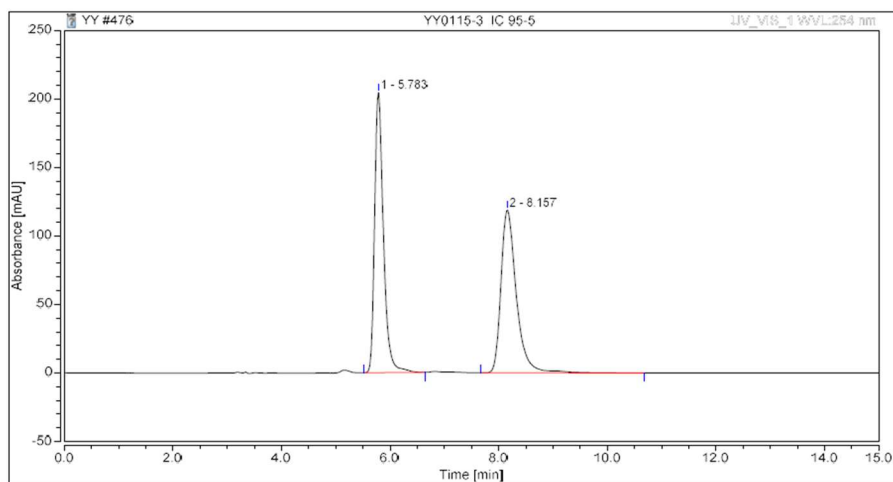

| Integration Results |           |                    |               |                |                 |                   |        |
|---------------------|-----------|--------------------|---------------|----------------|-----------------|-------------------|--------|
| No.                 | Peak Name | Retention Time min | Area mAU*min  | Height mAU     | Relative Area % | Relative Height % | Amount |
| 1                   |           | 5.783              | 38.599        | 204.542        | 49.73           | 63.21             | n.a.   |
| 2                   |           | 8.157              | 39.013        | 119.047        | 50.27           | 36.79             | n.a.   |
| <b>Total:</b>       |           |                    | <b>77.612</b> | <b>323.589</b> | <b>100.00</b>   | <b>100.00</b>     |        |

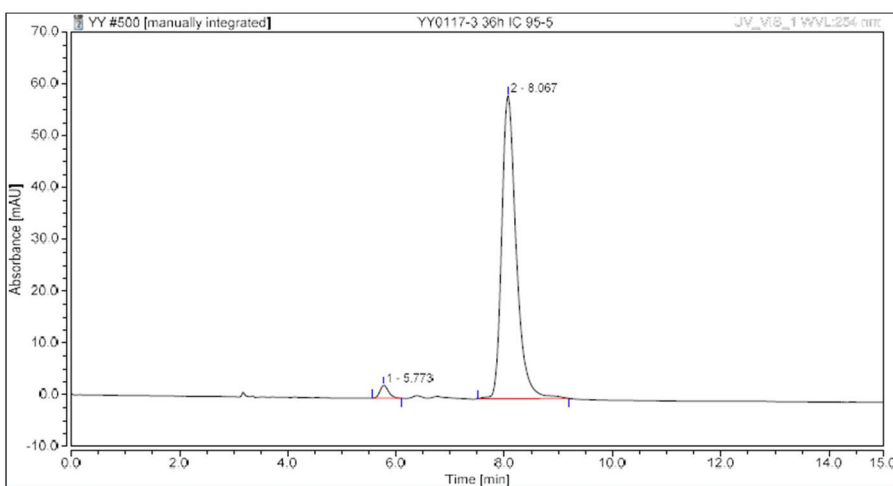

| Integration Results |           |                    |               |               |                 |                   |        |
|---------------------|-----------|--------------------|---------------|---------------|-----------------|-------------------|--------|
| No.                 | Peak Name | Retention Time min | Area mAU*min  | Height mAU    | Relative Area % | Relative Height % | Amount |
| 1                   |           | 5.773              | 0.448         | 2.488         | 2.40            | 4.08              | n.a.   |
| 2                   |           | 8.067              | 18.198        | 58.547        | 97.60           | 95.92             | n.a.   |
| <b>Total:</b>       |           |                    | <b>18.645</b> | <b>61.035</b> | <b>100.00</b>   | <b>100.00</b>     |        |



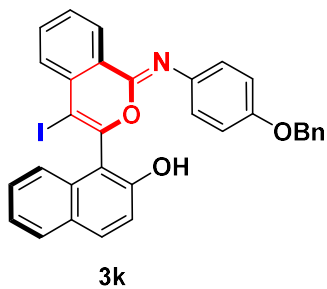

**HPLC analysis:** Chiralcel IC-H (Hexane/*i*-PrOH = 95:5, flow rate = 1.0 mL/min)

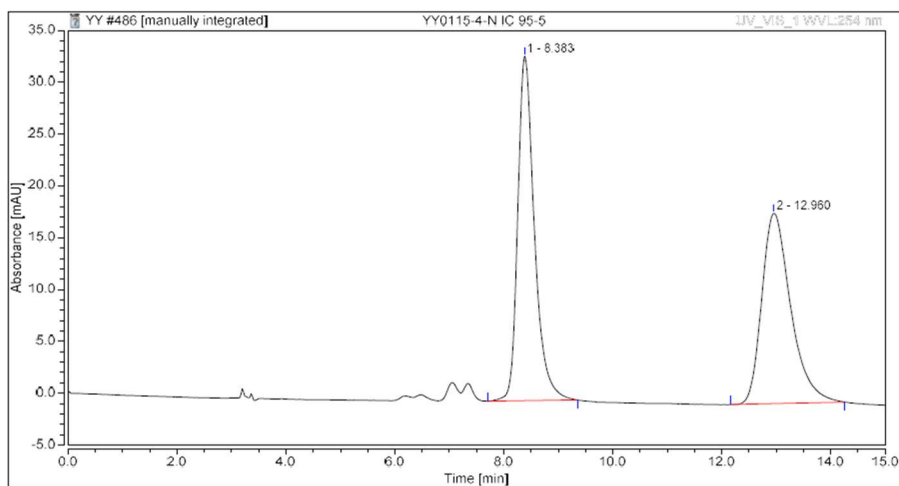

| Integration Results |           |                    |               |               |                 |                   |             |
|---------------------|-----------|--------------------|---------------|---------------|-----------------|-------------------|-------------|
| No.                 | Peak Name | Retention Time min | Area mAU*min  | Height mAU    | Relative Area % | Relative Height % | Amount n.a. |
| 1                   |           | 8.383              | 11.779        | 33.254        | 51.08           | 64.40             | n.a.        |
| 2                   |           | 12.960             | 11.282        | 18.383        | 48.92           | 35.60             | n.a.        |
| <b>Total:</b>       |           |                    | <b>23.061</b> | <b>51.638</b> | <b>100.00</b>   | <b>100.00</b>     |             |

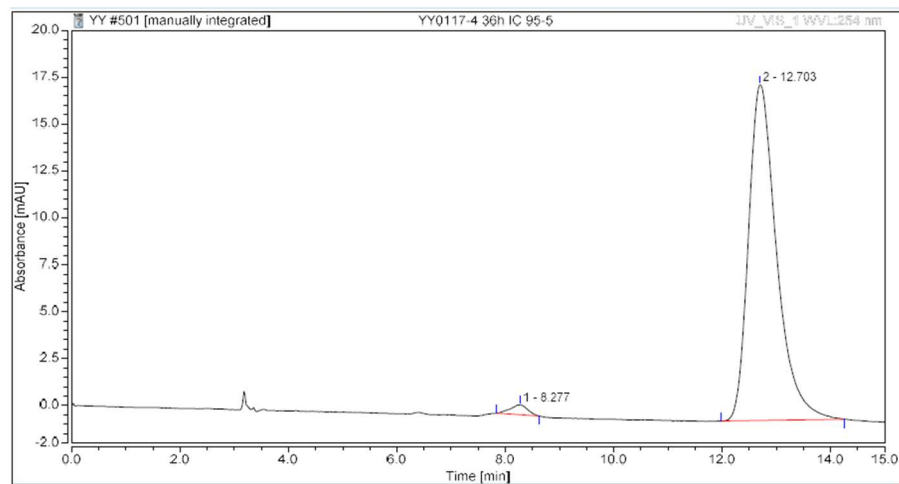

| Integration Results |           |                    |               |               |                 |                   |             |
|---------------------|-----------|--------------------|---------------|---------------|-----------------|-------------------|-------------|
| No.                 | Peak Name | Retention Time min | Area mAU*min  | Height mAU    | Relative Area % | Relative Height % | Amount n.a. |
| 1                   |           | 8.277              | 0.195         | 0.533         | 1.78            | 2.89              | n.a.        |
| 2                   |           | 12.703             | 10.772        | 17.933        | 98.22           | 97.11             | n.a.        |
| <b>Total:</b>       |           |                    | <b>10.967</b> | <b>18.465</b> | <b>100.00</b>   | <b>100.00</b>     |             |

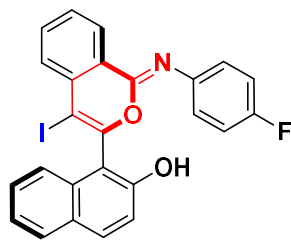

31

HPLC analysis: Chiralcel IC-H (Hexane/*i*-PrOH = 95:5, flow rate = 1.0 mL/min)

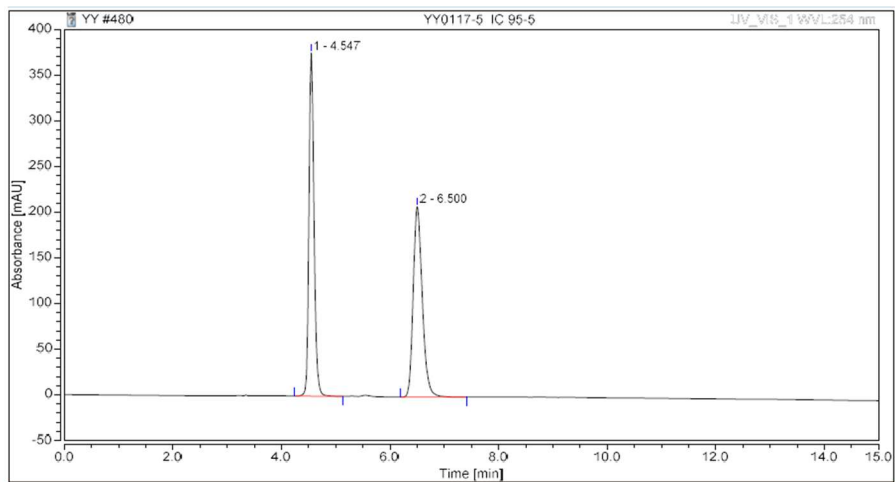

| Integration Results |           |                    |               |                |                 |                   |        |
|---------------------|-----------|--------------------|---------------|----------------|-----------------|-------------------|--------|
| No.                 | Peak Name | Retention Time min | Area mAU*min  | Height mAU     | Relative Area % | Relative Height % | Amount |
| 1                   |           | 4.547              | 40.794        | 375.749        | 50.21           | 64.31             | n.a.   |
| 2                   |           | 6.500              | 40.448        | 208.500        | 49.79           | 35.69             | n.a.   |
| <b>Total:</b>       |           |                    | <b>81.242</b> | <b>584.250</b> | <b>100.00</b>   | <b>100.00</b>     |        |

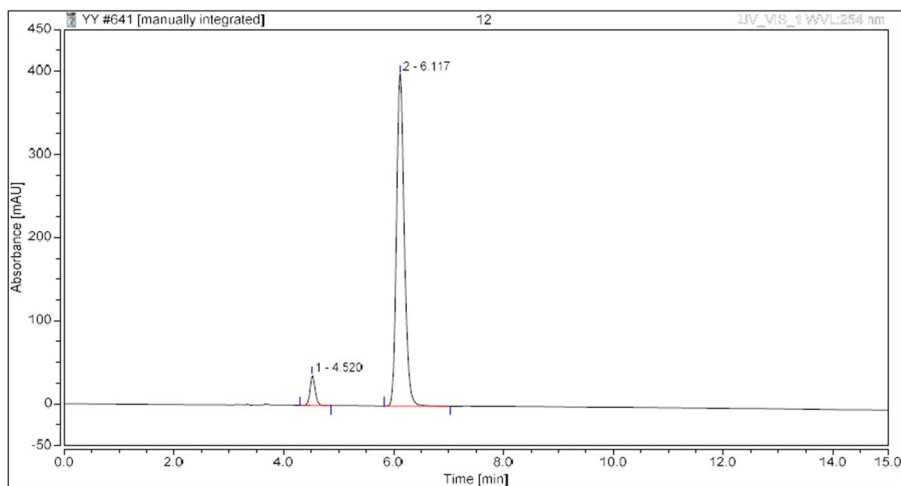

| Integration Results |           |                    |               |                |                 |                   |        |
|---------------------|-----------|--------------------|---------------|----------------|-----------------|-------------------|--------|
| No.                 | Peak Name | Retention Time min | Area mAU*min  | Height mAU     | Relative Area % | Relative Height % | Amount |
| 1                   |           | 4.520              | 3.859         | 36.280         | 5.56            | 8.33              | n.a.   |
| 2                   |           | 6.117              | 65.516        | 399.218        | 94.44           | 91.67             | n.a.   |
| <b>Total:</b>       |           |                    | <b>69.375</b> | <b>435.498</b> | <b>100.00</b>   | <b>100.00</b>     |        |

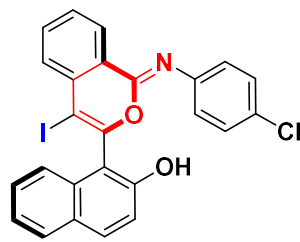

3m

HPLC analysis: Chiralcel IC-H (Hexane/*i*-PrOH = 95:5, flow rate = 1.0 mL/min)

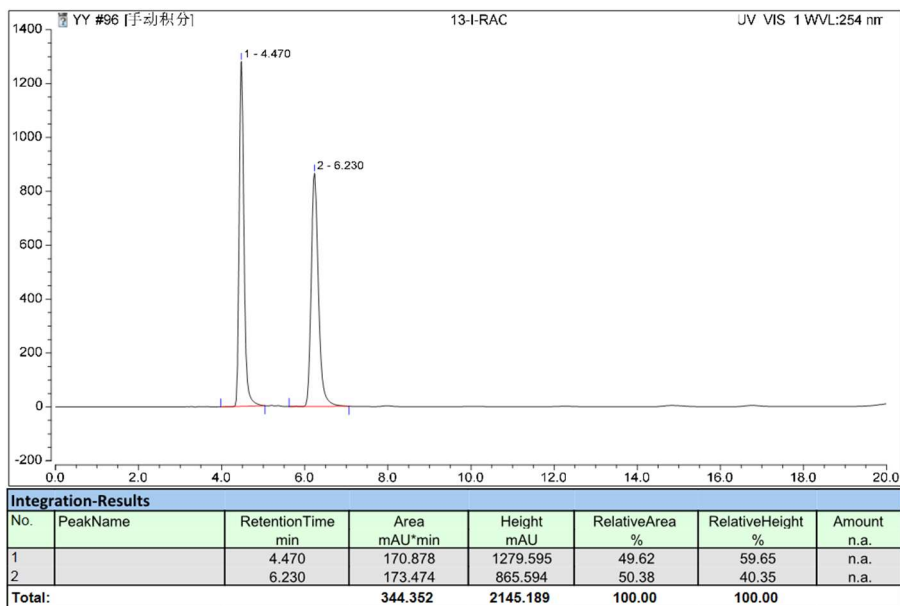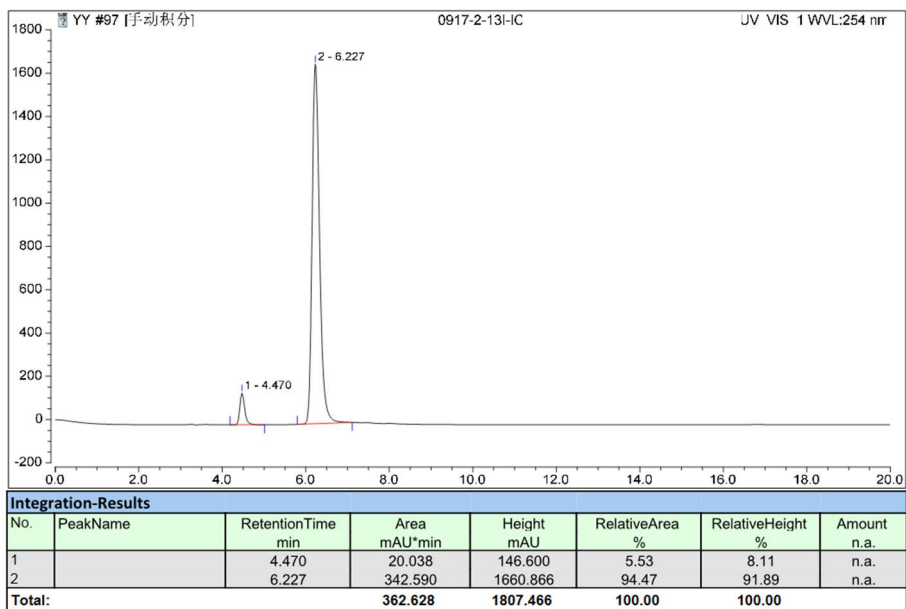

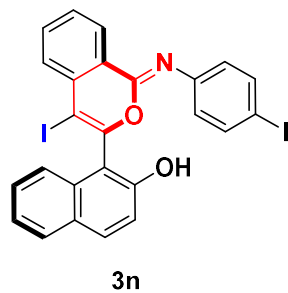

**HPLC analysis:** Chiralcel IC-H (Hexane/*i*-PrOH = 95:5, flow rate = 1.0 mL/min)

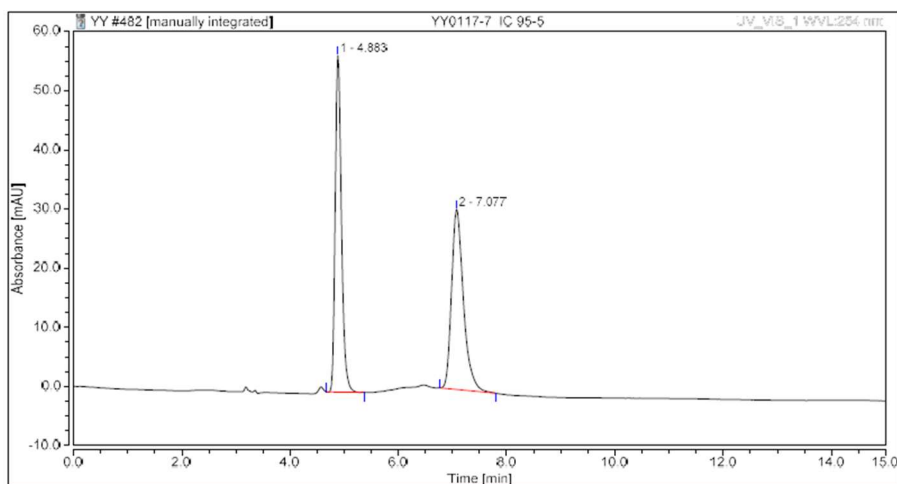

| Integration Results |           |                       |                 |               |                    |                      |                |
|---------------------|-----------|-----------------------|-----------------|---------------|--------------------|----------------------|----------------|
| No.                 | Peak Name | Retention Time<br>min | Area<br>mAU*min | Height<br>mAU | Relative Area<br>% | Relative Height<br>% | Amount<br>n.a. |
| 1                   |           | 4.883                 | 7.563           | 56.874        | 49.51              | 65.12                | n.a.           |
| 2                   |           | 7.077                 | 7.713           | 30.459        | 50.49              | 34.88                | n.a.           |
| <b>Total:</b>       |           |                       | <b>15.276</b>   | <b>87.334</b> | <b>100.00</b>      | <b>100.00</b>        |                |

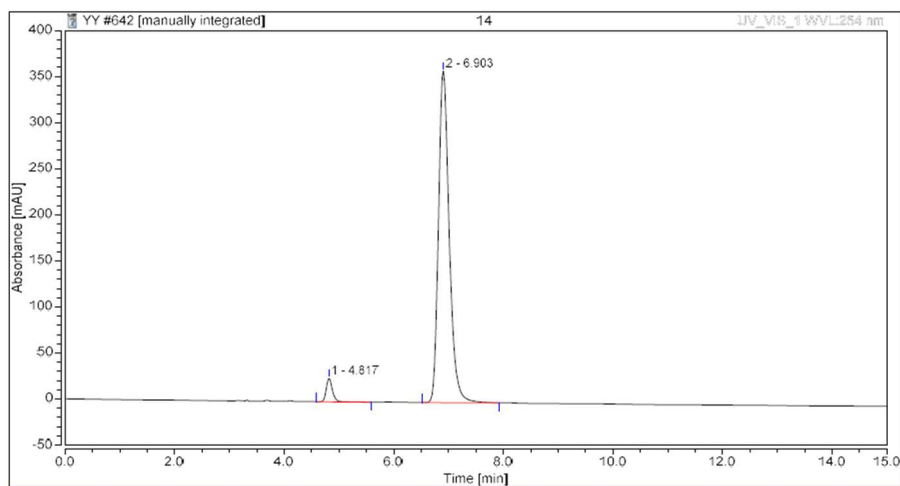

| Integration Results |           |                       |                 |                |                    |                      |                |
|---------------------|-----------|-----------------------|-----------------|----------------|--------------------|----------------------|----------------|
| No.                 | Peak Name | Retention Time<br>min | Area<br>mAU*min | Height<br>mAU  | Relative Area<br>% | Relative Height<br>% | Amount<br>n.a. |
| 1                   |           | 4.817                 | 3.275           | 25.665         | 3.85               | 6.65                 | n.a.           |
| 2                   |           | 6.903                 | 81.873          | 360.362        | 96.15              | 93.35                | n.a.           |
| <b>Total:</b>       |           |                       | <b>85.149</b>   | <b>386.027</b> | <b>100.00</b>      | <b>100.00</b>        |                |

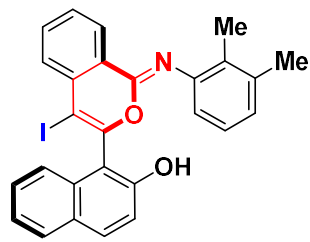

3o

HPLC analysis: Chiralcel IC-H (Hexane/*i*-PrOH = 95:5, flow rate = 1.0 mL/min)

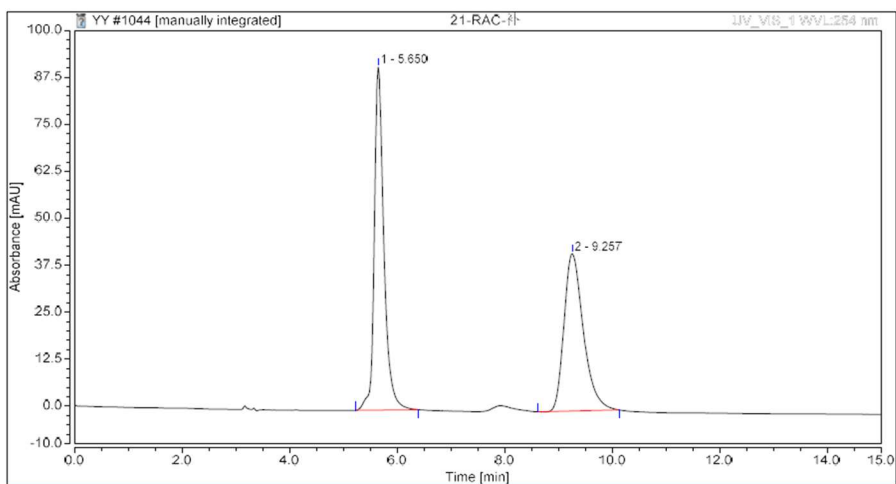

| Integration Results |           |                       |                 |                |                    |                      |                |
|---------------------|-----------|-----------------------|-----------------|----------------|--------------------|----------------------|----------------|
| No.                 | Peak Name | Retention Time<br>min | Area<br>mAU*min | Height<br>mAU  | Relative Area<br>% | Relative Height<br>% | Amount<br>n.a. |
| 1                   |           | 5.650                 | 18.892          | 91.399         | 51.99              | 68.55                | n.a.           |
| 2                   |           | 9.257                 | 17.448          | 41.933         | 48.01              | 31.45                | n.a.           |
| <b>Total:</b>       |           |                       | <b>36.339</b>   | <b>133.331</b> | <b>100.00</b>      | <b>100.00</b>        |                |

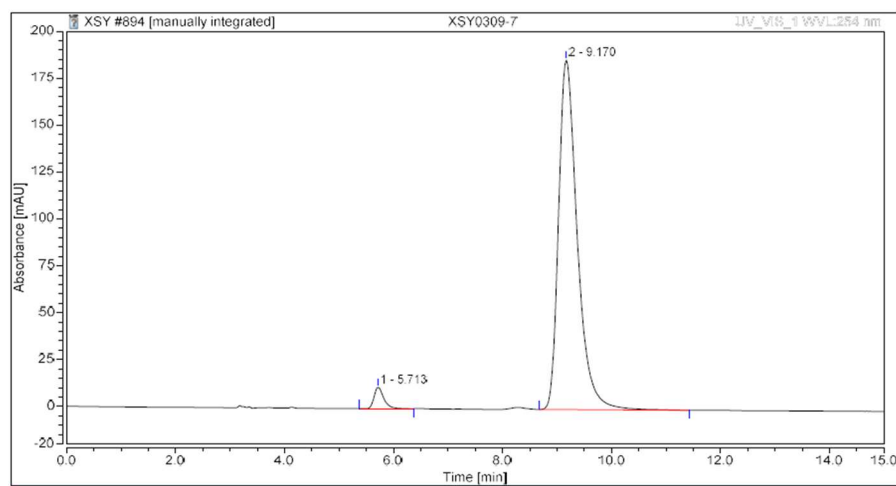

| Integration Results |           |                       |                 |                |                    |                      |                |
|---------------------|-----------|-----------------------|-----------------|----------------|--------------------|----------------------|----------------|
| No.                 | Peak Name | Retention Time<br>min | Area<br>mAU*min | Height<br>mAU  | Relative Area<br>% | Relative Height<br>% | Amount<br>n.a. |
| 1                   |           | 5.713                 | 2.329           | 11.410         | 3.05               | 5.76                 | n.a.           |
| 2                   |           | 9.170                 | 74.130          | 186.543        | 96.95              | 94.24                | n.a.           |
| <b>Total:</b>       |           |                       | <b>76.459</b>   | <b>197.954</b> | <b>100.00</b>      | <b>100.00</b>        |                |

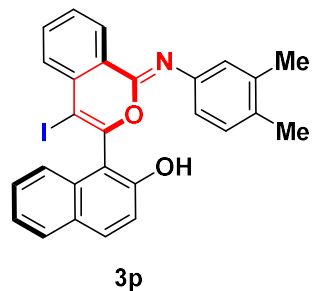

**HPLC analysis:** Chiralcel IC-H (Hexane/*i*-PrOH = 95:5, flow rate = 1.0 mL/min)

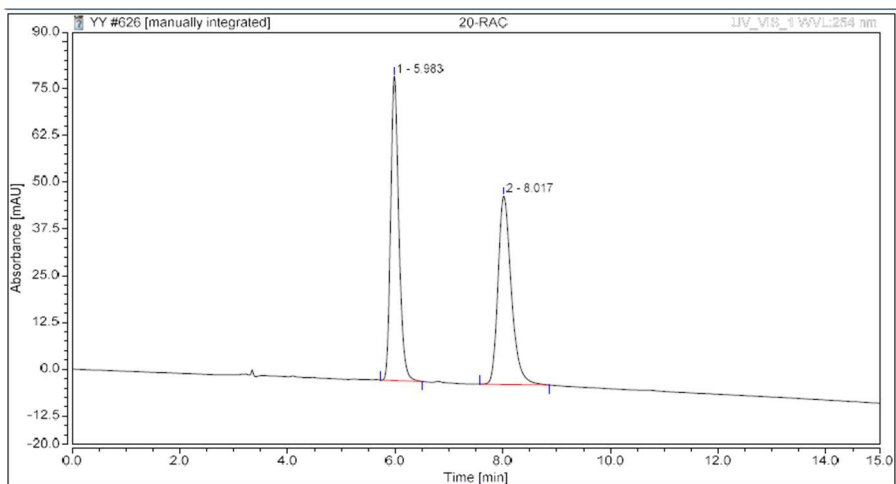

| Integration Results |           |                    |               |                |                 |                   |             |
|---------------------|-----------|--------------------|---------------|----------------|-----------------|-------------------|-------------|
| No.                 | Peak Name | Retention Time min | Area mAU*min  | Height mAU     | Relative Area % | Relative Height % | Amount n.a. |
| 1                   |           | 5.983              | 14.322        | 81.341         | 49.91           | 61.76             | n.a.        |
| 2                   |           | 8.017              | 14.373        | 50.359         | 50.09           | 38.24             | n.a.        |
| <b>Total:</b>       |           |                    | <b>28.695</b> | <b>131.699</b> | <b>100.00</b>   | <b>100.00</b>     |             |

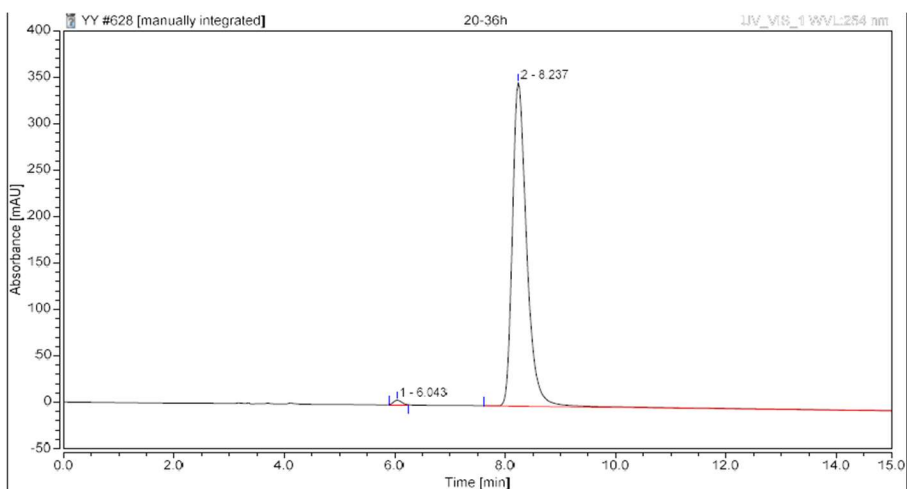

| Integration Results |           |                    |                |                |                 |                   |             |
|---------------------|-----------|--------------------|----------------|----------------|-----------------|-------------------|-------------|
| No.                 | Peak Name | Retention Time min | Area mAU*min   | Height mAU     | Relative Area % | Relative Height % | Amount n.a. |
| 1                   |           | 6.043              | 0.812          | 4.923          | 0.76            | 1.39              | n.a.        |
| 2                   |           | 8.237              | 105.873        | 348.618        | 99.24           | 98.61             | n.a.        |
| <b>Total:</b>       |           |                    | <b>106.685</b> | <b>353.541</b> | <b>100.00</b>   | <b>100.00</b>     |             |

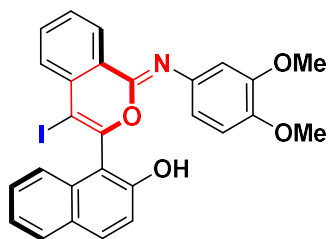

3q

HPLC analysis: Chiralcel IC-H (Hexane/*i*-PrOH = 95:5, flow rate = 1.0 mL/min)

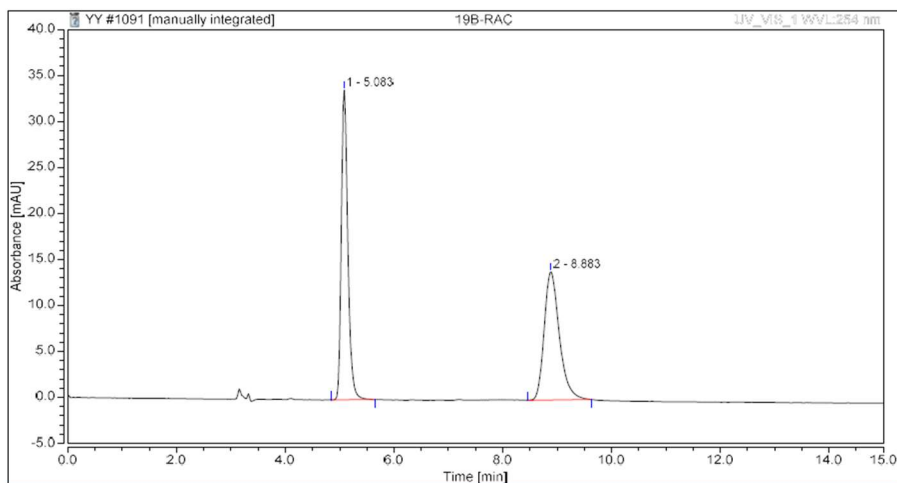

| Integration Results |           |                       |                 |               |                    |                      |                |
|---------------------|-----------|-----------------------|-----------------|---------------|--------------------|----------------------|----------------|
| No.                 | Peak Name | Retention Time<br>min | Area<br>mAU*min | Height<br>mAU | Relative Area<br>% | Relative Height<br>% | Amount<br>n.a. |
| 1                   |           | 5.083                 | 4.678           | 33.712        | 51.02              | 70.72                | n.a.           |
| 2                   |           | 8.883                 | 4.491           | 13.958        | 48.98              | 29.28                | n.a.           |
| <b>Total:</b>       |           |                       | <b>9.169</b>    | <b>47.669</b> | <b>100.00</b>      | <b>100.00</b>        |                |

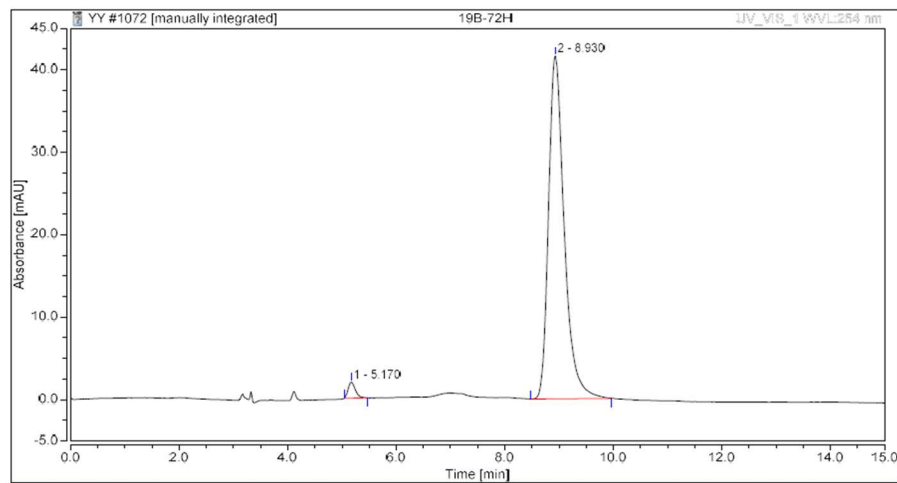

| Integration Results |           |                       |                 |               |                    |                      |                |
|---------------------|-----------|-----------------------|-----------------|---------------|--------------------|----------------------|----------------|
| No.                 | Peak Name | Retention Time<br>min | Area<br>mAU*min | Height<br>mAU | Relative Area<br>% | Relative Height<br>% | Amount<br>n.a. |
| 1                   |           | 5.170                 | 0.299           | 1.982         | 2.11               | 4.55                 | n.a.           |
| 2                   |           | 8.930                 | 13.897          | 41.588        | 97.89              | 95.45                | n.a.           |
| <b>Total:</b>       |           |                       | <b>14.196</b>   | <b>43.570</b> | <b>100.00</b>      | <b>100.00</b>        |                |

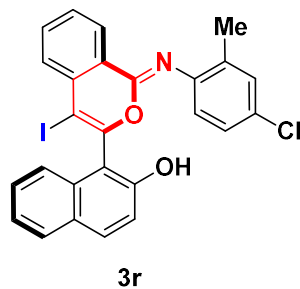

**HPLC analysis:** Chiralcel IC-H (Hexane/*i*-PrOH = 95:5, flow rate = 1.0 mL/min)

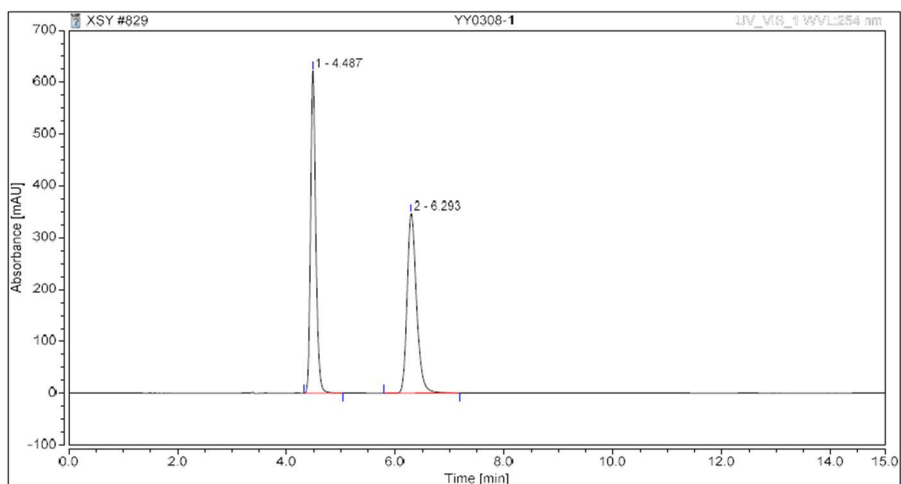

| Integration Results |           |                    |                |                |                 |                   |             |
|---------------------|-----------|--------------------|----------------|----------------|-----------------|-------------------|-------------|
| No.                 | Peak Name | Retention Time min | Area mAU*min   | Height mAU     | Relative Area % | Relative Height % | Amount n.a. |
| 1                   |           | 4.487              | 69.476         | 622.646        | 50.01           | 64.21             | n.a.        |
| 2                   |           | 6.293              | 69.440         | 346.986        | 49.99           | 35.79             | n.a.        |
| <b>Total:</b>       |           |                    | <b>138.917</b> | <b>969.633</b> | <b>100.00</b>   | <b>100.00</b>     |             |

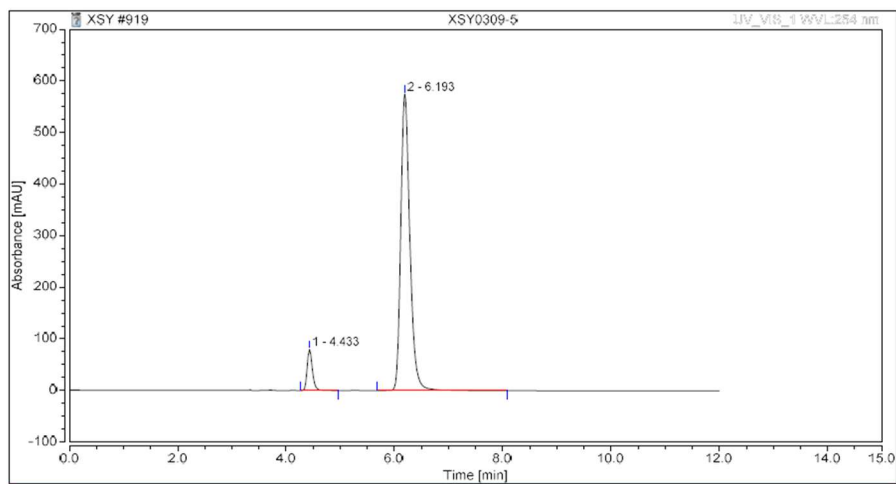

| Integration Results |           |                    |                |                |                 |                   |             |
|---------------------|-----------|--------------------|----------------|----------------|-----------------|-------------------|-------------|
| No.                 | Peak Name | Retention Time min | Area mAU*min   | Height mAU     | Relative Area % | Relative Height % | Amount n.a. |
| 1                   |           | 4.433              | 8.837          | 80.117         | 7.32            | 12.23             | n.a.        |
| 2                   |           | 6.193              | 111.823        | 575.177        | 92.68           | 87.77             | n.a.        |
| <b>Total:</b>       |           |                    | <b>120.660</b> | <b>655.294</b> | <b>100.00</b>   | <b>100.00</b>     |             |



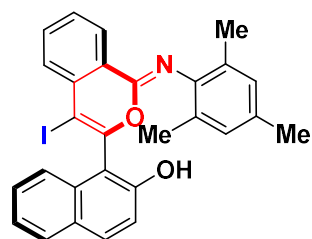

**3s**

**HPLC analysis:** Chiralcel IC-H (Hexane/*i*-PrOH = 95:5, flow rate = 1.0 mL/min)

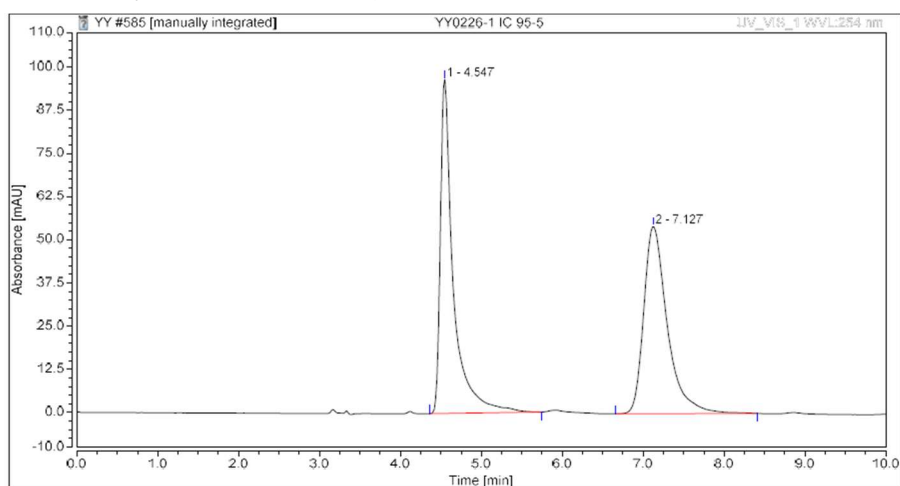

| Integration Results |           |                       |                 |                |                    |                      |                |
|---------------------|-----------|-----------------------|-----------------|----------------|--------------------|----------------------|----------------|
| No.                 | Peak Name | Retention Time<br>min | Area<br>mAU*min | Height<br>mAU  | Relative Area<br>% | Relative Height<br>% | Amount<br>n.a. |
| 1                   |           | 4.547                 | 17.931          | 96.635         | 49.56              | 64.05                | n.a.           |
| 2                   |           | 7.127                 | 18.250          | 54.229         | 50.44              | 35.95                | n.a.           |
| <b>Total:</b>       |           |                       | <b>36.180</b>   | <b>150.864</b> | <b>100.00</b>      | <b>100.00</b>        |                |

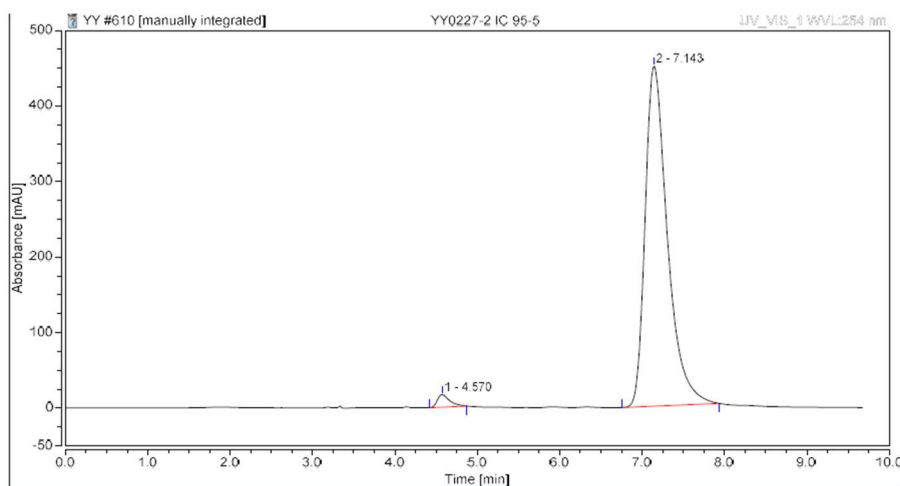

| Integration Results |           |                       |                 |                |                    |                      |                |
|---------------------|-----------|-----------------------|-----------------|----------------|--------------------|----------------------|----------------|
| No.                 | Peak Name | Retention Time<br>min | Area<br>mAU*min | Height<br>mAU  | Relative Area<br>% | Relative Height<br>% | Amount<br>n.a. |
| 1                   |           | 4.570                 | 2.866           | 16.826         | 1.99               | 3.60                 | n.a.           |
| 2                   |           | 7.143                 | 141.278         | 450.992        | 98.01              | 96.40                | n.a.           |
| <b>Total:</b>       |           |                       | <b>144.144</b>  | <b>467.818</b> | <b>100.00</b>      | <b>100.00</b>        |                |

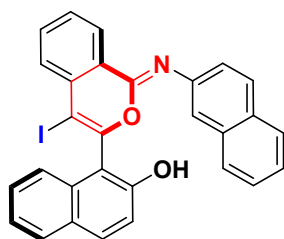

**3t**

**HPLC analysis:** Chiralcel IC-H (Hexane/*i*-PrOH = 95:5, flow rate = 1.0 mL/min)

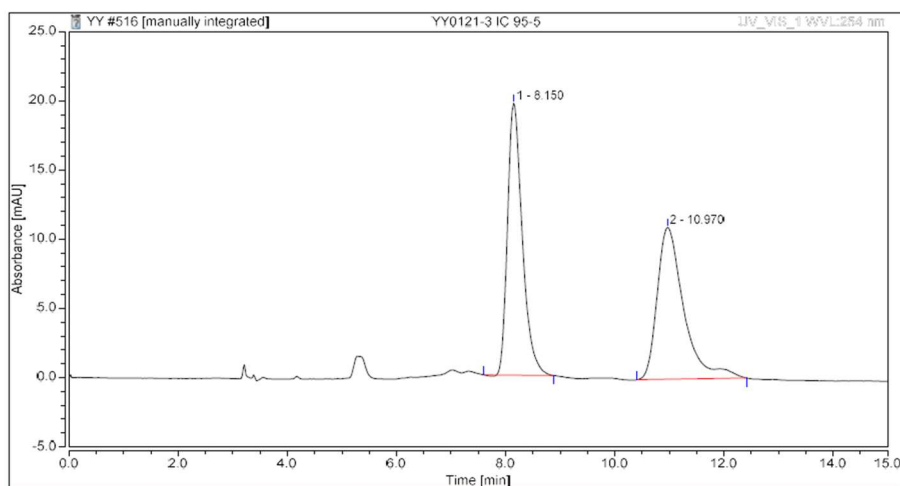

| Integration Results |           |                       |                 |               |                    |                      |                |
|---------------------|-----------|-----------------------|-----------------|---------------|--------------------|----------------------|----------------|
| No.                 | Peak Name | Retention Time<br>min | Area<br>mAU*min | Height<br>mAU | Relative Area<br>% | Relative Height<br>% | Amount<br>n.a. |
| 1                   |           | 8.150                 | 6.155           | 19.658        | 49.88              | 64.15                | n.a.           |
| 2                   |           | 10.970                | 6.184           | 10.986        | 50.12              | 35.85                | n.a.           |
| <b>Total:</b>       |           |                       | <b>12.338</b>   | <b>30.644</b> | <b>100.00</b>      | <b>100.00</b>        |                |

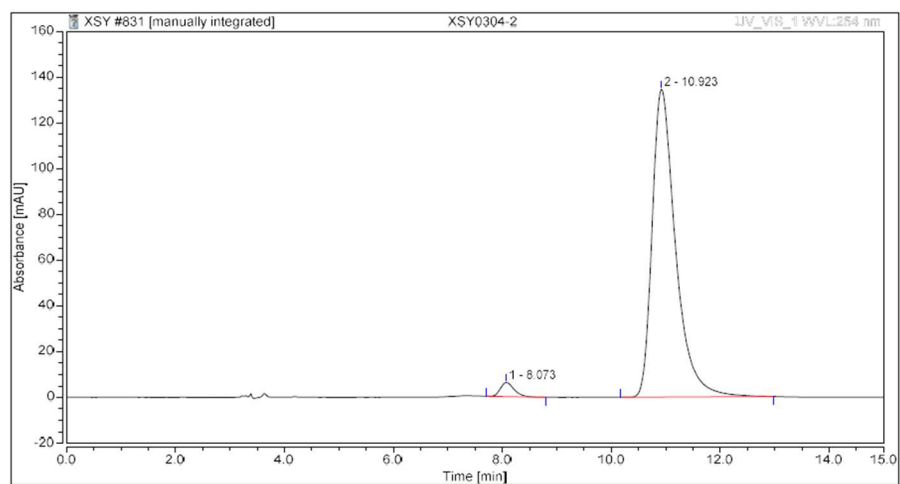

| Integration Results |           |                       |                 |                |                    |                      |                |
|---------------------|-----------|-----------------------|-----------------|----------------|--------------------|----------------------|----------------|
| No.                 | Peak Name | Retention Time<br>min | Area<br>mAU*min | Height<br>mAU  | Relative Area<br>% | Relative Height<br>% | Amount<br>n.a. |
| 1                   |           | 8.073                 | 1.808           | 6.181          | 2.63               | 4.39                 | n.a.           |
| 2                   |           | 10.923                | 67.047          | 134.624        | 97.37              | 95.61                | n.a.           |
| <b>Total:</b>       |           |                       | <b>68.855</b>   | <b>140.804</b> | <b>100.00</b>      | <b>100.00</b>        |                |

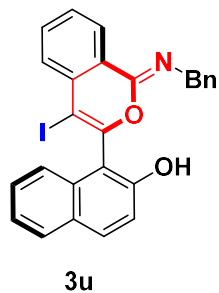

**HPLC analysis:** Chiralcel IC-H (Hexane/*i*-PrOH = 95:5, flow rate = 1.0 mL/min)

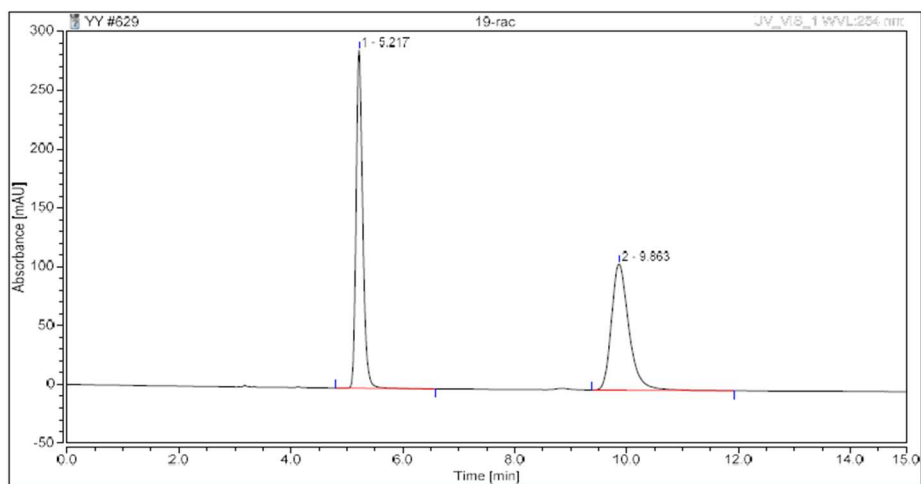

| Integration Results |           |                    |               |                |                 |                   |             |
|---------------------|-----------|--------------------|---------------|----------------|-----------------|-------------------|-------------|
| No.                 | Peak Name | Retention Time min | Area mAU*min  | Height mAU     | Relative Area % | Relative Height % | Amount n.a. |
| 1                   |           | 5.217              | 39.326        | 287.353        | 50.34           | 72.79             | n.a.        |
| 2                   |           | 9.863              | 38.789        | 107.413        | 49.66           | 27.21             | n.a.        |
| <b>Total:</b>       |           |                    | <b>78.115</b> | <b>394.766</b> | <b>100.00</b>   | <b>100.00</b>     |             |

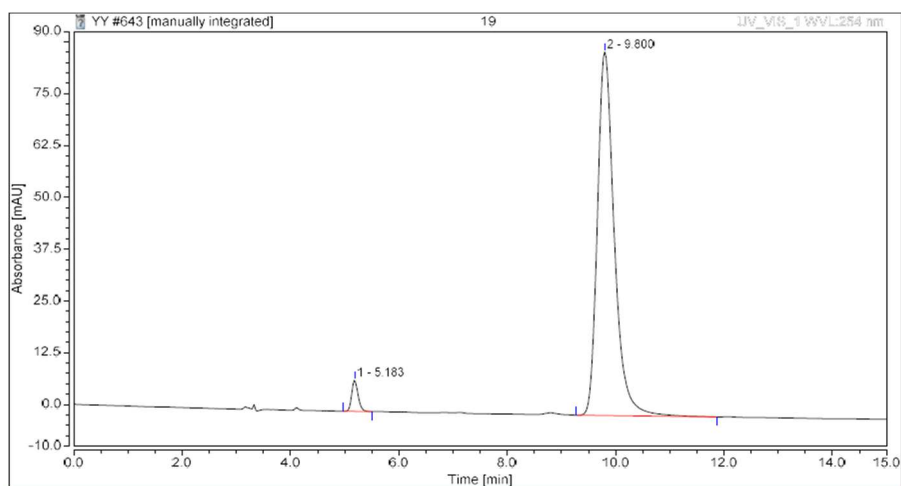

| Integration Results |           |                    |               |               |                 |                   |             |
|---------------------|-----------|--------------------|---------------|---------------|-----------------|-------------------|-------------|
| No.                 | Peak Name | Retention Time min | Area mAU*min  | Height mAU    | Relative Area % | Relative Height % | Amount n.a. |
| 1                   |           | 5.183              | 1.024         | 7.507         | 3.13            | 7.88              | n.a.        |
| 2                   |           | 9.800              | 31.719        | 87.743        | 96.87           | 92.12             | n.a.        |
| <b>Total:</b>       |           |                    | <b>32.743</b> | <b>95.250</b> | <b>100.00</b>   | <b>100.00</b>     |             |

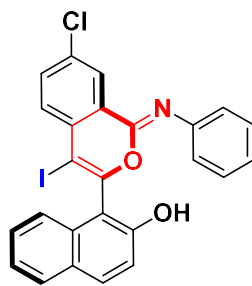

**3v**

**HPLC analysis:** Chiralcel IC-H (Hexane/*i*-PrOH = 95:5, flow rate = 1.0 mL/min)

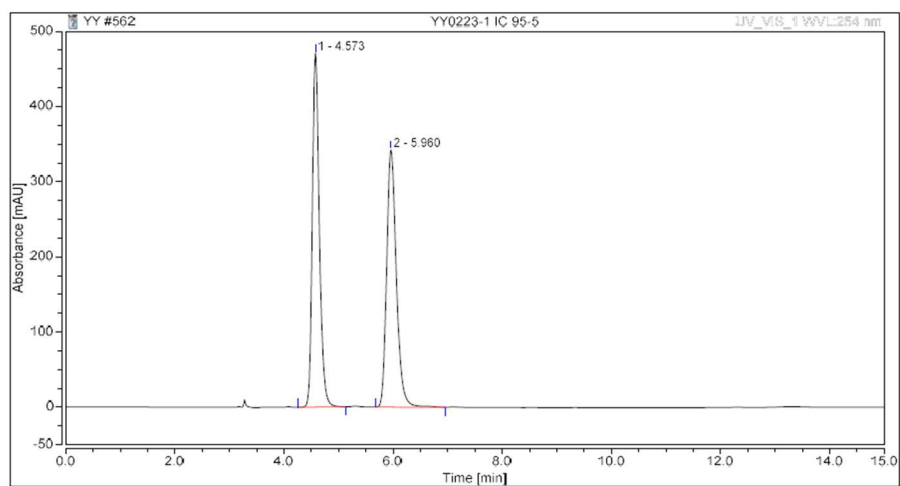

| Integration Results |           |                    |                |                |                 |                   |        |
|---------------------|-----------|--------------------|----------------|----------------|-----------------|-------------------|--------|
| No.                 | Peak Name | Retention Time min | Area mAU*min   | Height mAU     | Relative Area % | Relative Height % | Amount |
| 1                   |           | 4.573              | 70.335         | 470.984        | 50.01           | 57.89             | n.a.   |
| 2                   |           | 5.960              | 70.296         | 342.636        | 49.99           | 42.11             | n.a.   |
| <b>Total:</b>       |           |                    | <b>140.631</b> | <b>813.620</b> | <b>100.00</b>   | <b>100.00</b>     |        |

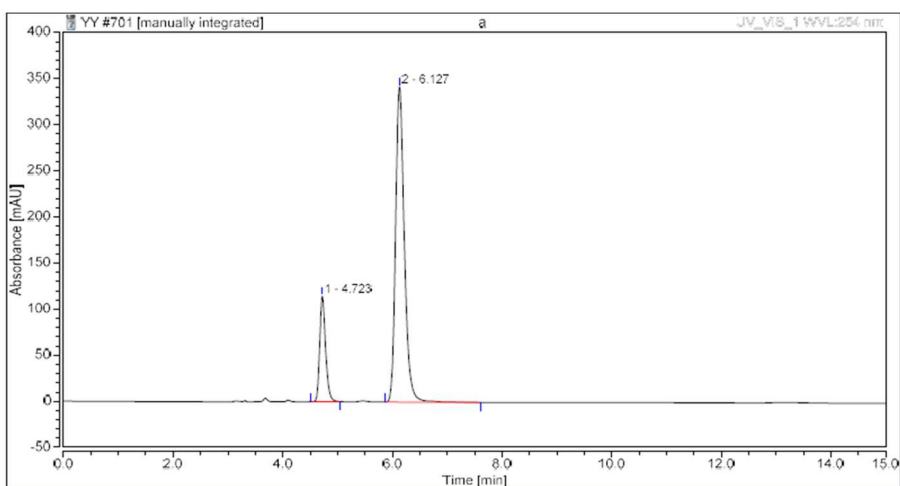

| Integration Results |           |                    |               |                |                 |                   |        |
|---------------------|-----------|--------------------|---------------|----------------|-----------------|-------------------|--------|
| No.                 | Peak Name | Retention Time min | Area mAU*min  | Height mAU     | Relative Area % | Relative Height % | Amount |
| 1                   |           | 4.723              | 14.068        | 114.563        | 18.16           | 25.09             | n.a.   |
| 2                   |           | 6.127              | 63.411        | 342.129        | 81.84           | 74.91             | n.a.   |
| <b>Total:</b>       |           |                    | <b>77.479</b> | <b>456.693</b> | <b>100.00</b>   | <b>100.00</b>     |        |

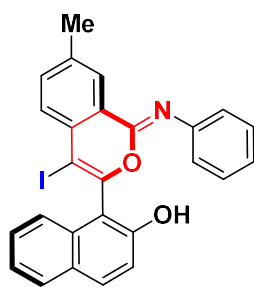

3w

HPLC analysis: Chiralcel IC-H (Hexane/*i*-PrOH = 95:5, flow rate = 1.0 mL/min)

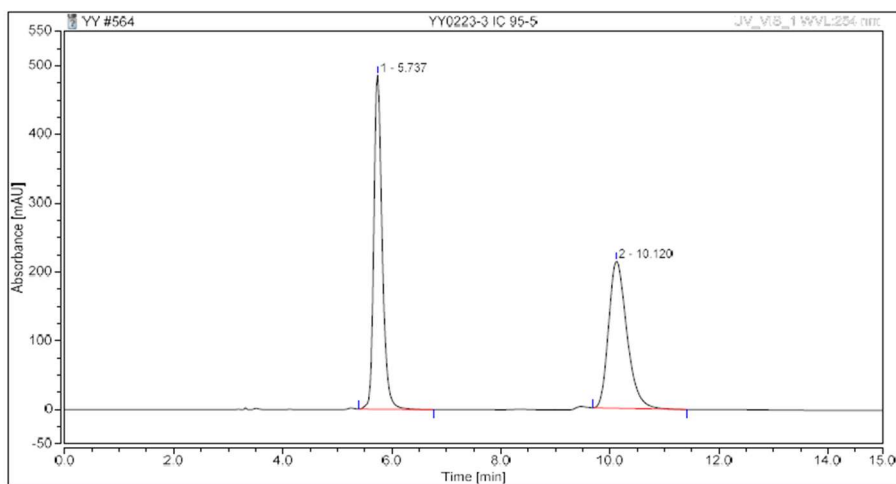

| Integration Results |           |                    |              |            |                 |                   |        |
|---------------------|-----------|--------------------|--------------|------------|-----------------|-------------------|--------|
| No.                 | Peak Name | Retention Time min | Area mAU*min | Height mAU | Relative Area % | Relative Height % | Amount |
| 1                   |           | 5.737              | 86.395       | 485.887    | 50.93           | 69.42             | n.a.   |
| 2                   |           | 10.120             | 83.234       | 214.000    | 49.07           | 30.58             | n.a.   |
| Total:              |           |                    | 169.630      | 699.887    | 100.00          | 100.00            |        |

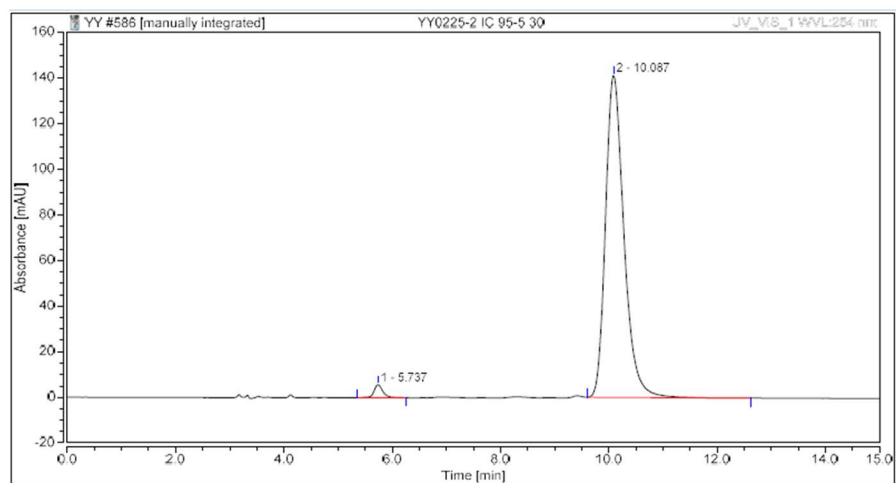

| Integration Results |           |                    |              |            |                 |                   |        |
|---------------------|-----------|--------------------|--------------|------------|-----------------|-------------------|--------|
| No.                 | Peak Name | Retention Time min | Area mAU*min | Height mAU | Relative Area % | Relative Height % | Amount |
| 1                   |           | 5.737              | 1.094        | 5.762      | 1.92            | 3.92              | n.a.   |
| 2                   |           | 10.087             | 55.748       | 141.297    | 98.08           | 96.08             | n.a.   |
| Total:              |           |                    | 56.842       | 147.059    | 100.00          | 100.00            |        |

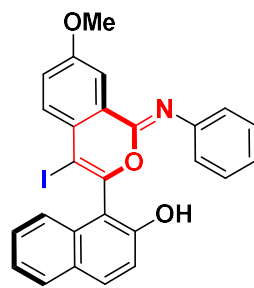

3x

HPLC analysis: Chiralcel IC-H (Hexane/*i*-PrOH = 95:5, flow rate = 1.0 mL/min)

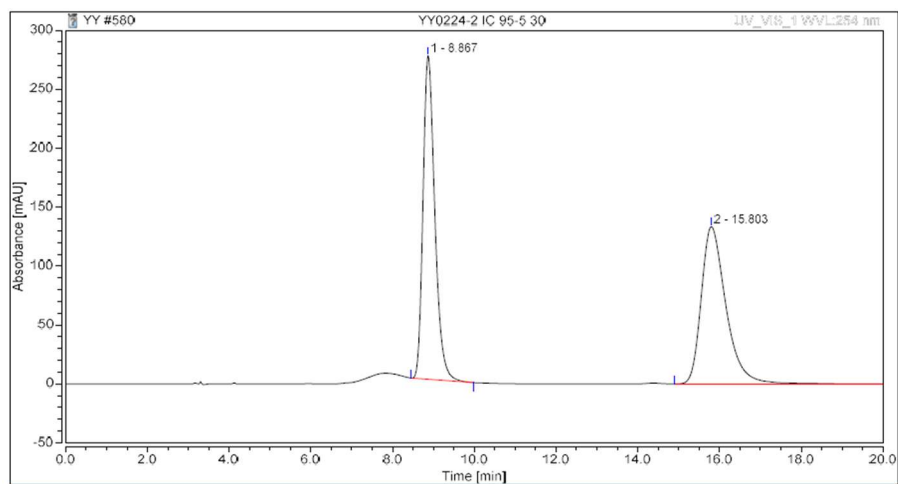

| Integration Results |           |                    |                |                |                 |                   |        |
|---------------------|-----------|--------------------|----------------|----------------|-----------------|-------------------|--------|
| No.                 | Peak Name | Retention Time min | Area mAU*min   | Height mAU     | Relative Area % | Relative Height % | Amount |
| 1                   |           | 8.867              | 91.371         | 274.813        | 49.37           | 67.30             | n.a.   |
| 2                   |           | 15.803             | 93.693         | 133.508        | 50.63           | 32.70             | n.a.   |
| <b>Total:</b>       |           |                    | <b>185.064</b> | <b>408.322</b> | <b>100.00</b>   | <b>100.00</b>     |        |

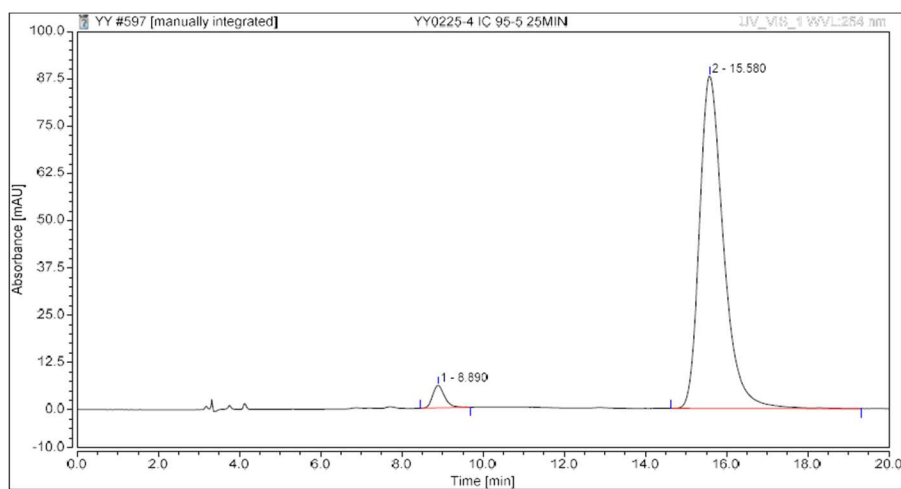

| Integration Results |           |                    |               |               |                 |                   |        |
|---------------------|-----------|--------------------|---------------|---------------|-----------------|-------------------|--------|
| No.                 | Peak Name | Retention Time min | Area mAU*min  | Height mAU    | Relative Area % | Relative Height % | Amount |
| 1                   |           | 8.890              | 2.025         | 5.955         | 3.25            | 6.34              | n.a.   |
| 2                   |           | 15.580             | 60.365        | 88.027        | 96.75           | 93.66             | n.a.   |
| <b>Total:</b>       |           |                    | <b>62.389</b> | <b>93.982</b> | <b>100.00</b>   | <b>100.00</b>     |        |

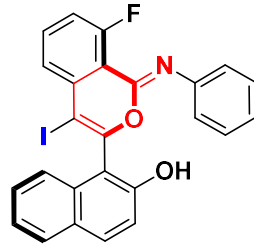

3y

HPLC analysis: Chiralcel IC-H (Hexane/*i*-PrOH = 95:5, flow rate = 1.0 mL/min)

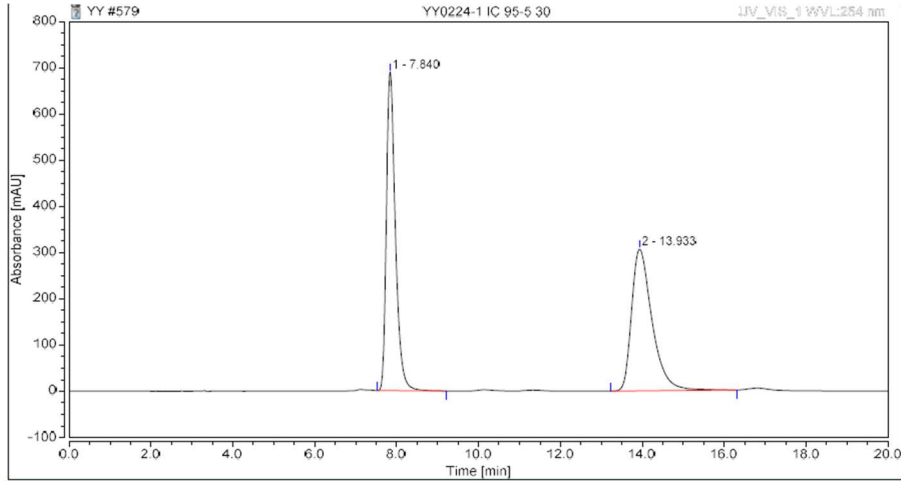

| Integration Results |           |                    |                |                |                 |                   |             |
|---------------------|-----------|--------------------|----------------|----------------|-----------------|-------------------|-------------|
| No.                 | Peak Name | Retention Time min | Area mAU*min   | Height mAU     | Relative Area % | Relative Height % | Amount n.a. |
| 1                   |           | 7.840              | 176.194        | 689.725        | 49.88           | 69.22             | n.a.        |
| 2                   |           | 13.933             | 177.046        | 306.752        | 50.12           | 30.78             | n.a.        |
| <b>Total:</b>       |           |                    | <b>353.241</b> | <b>996.477</b> | <b>100.00</b>   | <b>100.00</b>     |             |

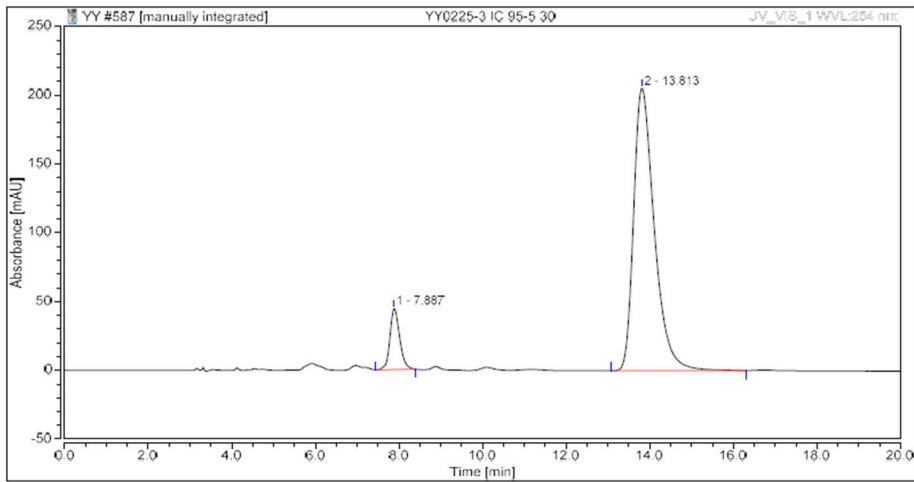

| Integration Results |           |                    |                |                |                 |                   |             |
|---------------------|-----------|--------------------|----------------|----------------|-----------------|-------------------|-------------|
| No.                 | Peak Name | Retention Time min | Area mAU*min   | Height mAU     | Relative Area % | Relative Height % | Amount n.a. |
| 1                   |           | 7.887              | 11.970         | 44.612         | 9.26            | 17.82             | n.a.        |
| 2                   |           | 13.813             | 117.345        | 205.744        | 90.74           | 82.18             | n.a.        |
| <b>Total:</b>       |           |                    | <b>129.315</b> | <b>250.357</b> | <b>100.00</b>   | <b>100.00</b>     |             |

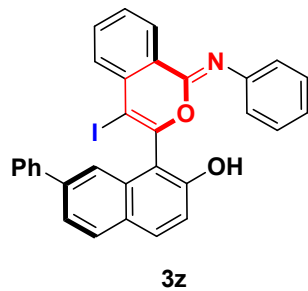

**HPLC analysis:** Chiralcel IC-H (Hexane/*i*-PrOH = 95:5, flow rate = 1.0 mL/min)

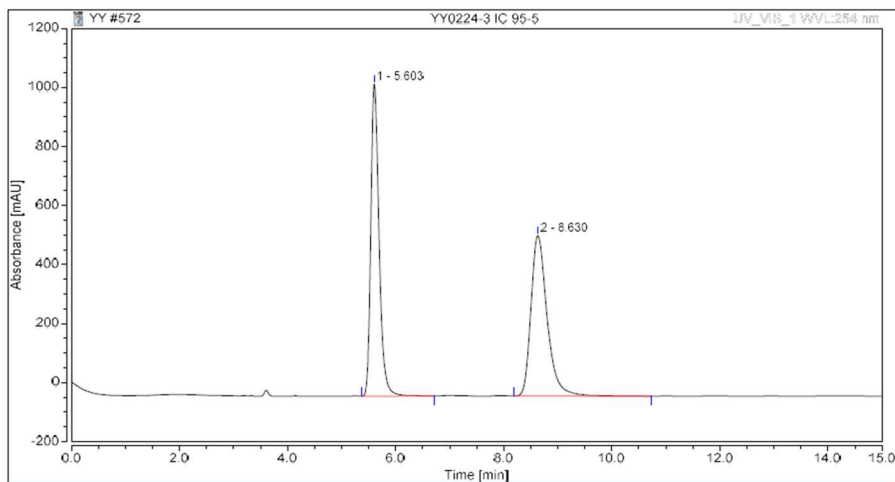

| Integration Results |           |                       |                 |                 |                    |                      |                |
|---------------------|-----------|-----------------------|-----------------|-----------------|--------------------|----------------------|----------------|
| No.                 | Peak Name | Retention Time<br>min | Area<br>mAU*min | Height<br>mAU   | Relative Area<br>% | Relative Height<br>% | Amount<br>n.a. |
| 1                   |           | 5.603                 | 186.608         | 1058.900        | 49.75              | 66.03                | n.a.           |
| 2                   |           | 8.630                 | 188.450         | 544.873         | 50.25              | 33.97                | n.a.           |
| <b>Total:</b>       |           |                       | <b>375.059</b>  | <b>1603.773</b> | <b>100.00</b>      | <b>100.00</b>        |                |

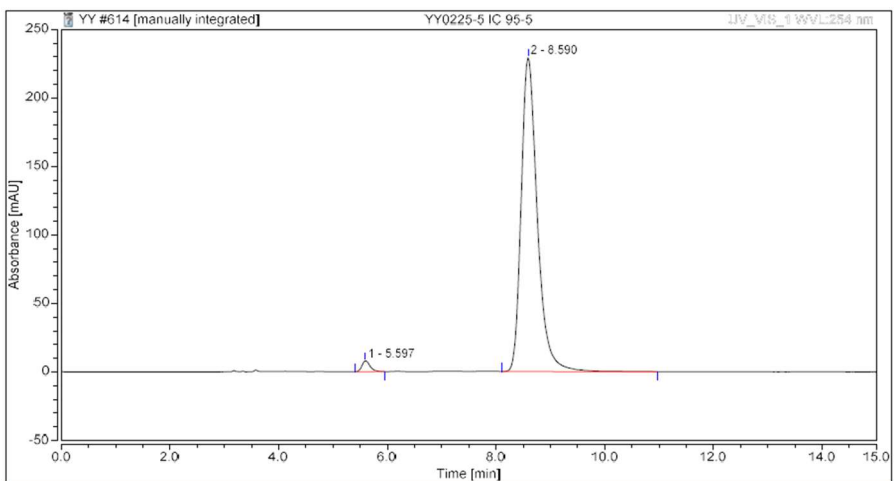

| Integration Results |           |                       |                 |                |                    |                      |                |
|---------------------|-----------|-----------------------|-----------------|----------------|--------------------|----------------------|----------------|
| No.                 | Peak Name | Retention Time<br>min | Area<br>mAU*min | Height<br>mAU  | Relative Area<br>% | Relative Height<br>% | Amount<br>n.a. |
| 1                   |           | 5.597                 | 1.380           | 7.937          | 1.72               | 3.35                 | n.a.           |
| 2                   |           | 8.590                 | 78.722          | 229.179        | 98.28              | 96.65                | n.a.           |
| <b>Total:</b>       |           |                       | <b>80.102</b>   | <b>237.115</b> | <b>100.00</b>      | <b>100.00</b>        |                |



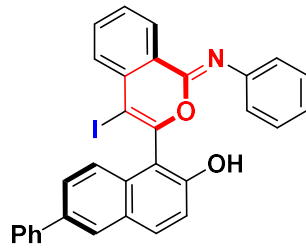

**3aa**

**HPLC analysis:** Chiralcel IC-H (Hexane/*i*-PrOH = 95:5, flow rate = 1.0 mL/min)

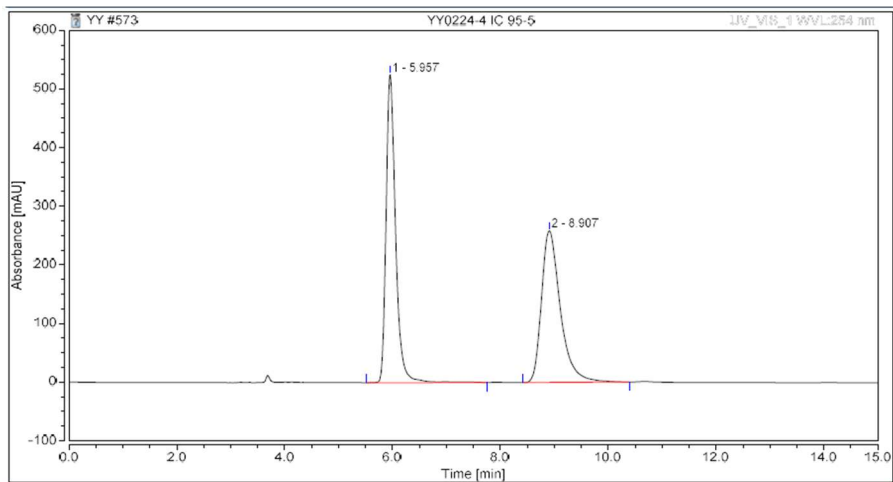

| Integration Results |           |                    |                |                |                 |                   |             |
|---------------------|-----------|--------------------|----------------|----------------|-----------------|-------------------|-------------|
| No.                 | Peak Name | Retention Time min | Area mAU*min   | Height mAU     | Relative Area % | Relative Height % | Amount n.a. |
| 1                   |           | 5.957              | 106.995        | 525.382        | 50.55           | 66.96             | n.a.        |
| 2                   |           | 8.907              | 104.678        | 259.186        | 49.45           | 33.04             | n.a.        |
| <b>Total:</b>       |           |                    | <b>211.673</b> | <b>784.568</b> | <b>100.00</b>   | <b>100.00</b>     |             |

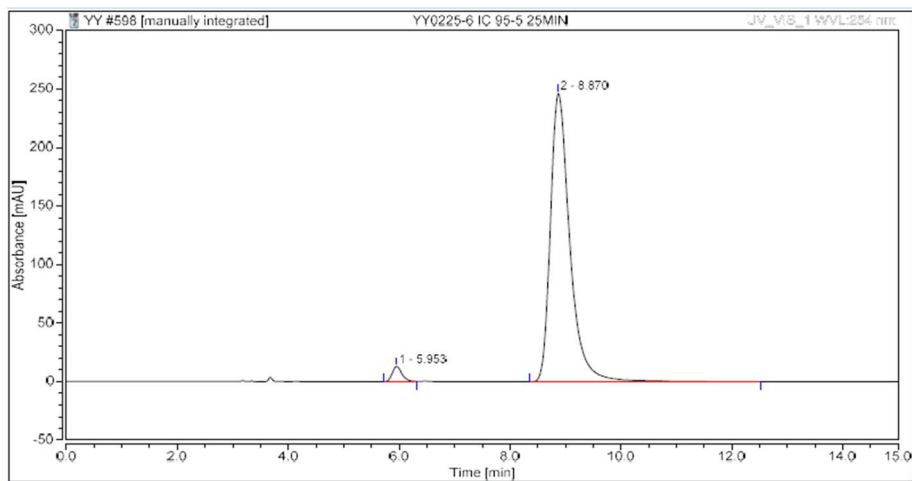

| Integration Results |           |                    |                |                |                 |                   |             |
|---------------------|-----------|--------------------|----------------|----------------|-----------------|-------------------|-------------|
| No.                 | Peak Name | Retention Time min | Area mAU*min   | Height mAU     | Relative Area % | Relative Height % | Amount n.a. |
| 1                   |           | 5.953              | 2.593          | 13.056         | 2.52            | 5.03              | n.a.        |
| 2                   |           | 8.870              | 100.118        | 246.673        | 97.48           | 94.97             | n.a.        |
| <b>Total:</b>       |           |                    | <b>102.711</b> | <b>259.730</b> | <b>100.00</b>   | <b>100.00</b>     |             |

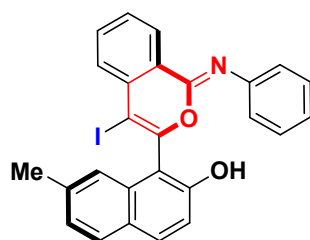

**3ab**

**HPLC analysis:** Chiralcel IC-H (Hexane/*i*-PrOH = 95:5, flow rate = 1.0 mL/min)

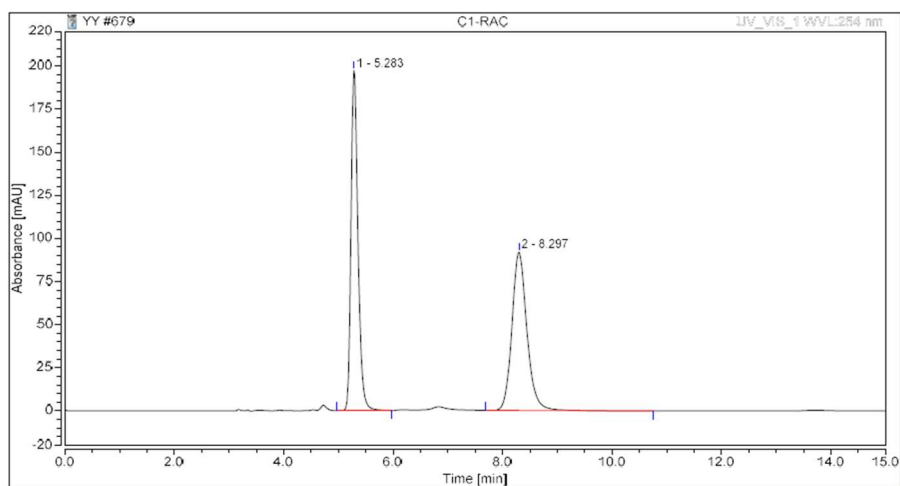

| Integration Results |           |                       |                 |                |                    |                      |                |
|---------------------|-----------|-----------------------|-----------------|----------------|--------------------|----------------------|----------------|
| No.                 | Peak Name | Retention Time<br>min | Area<br>mAU*min | Height<br>mAU  | Relative Area<br>% | Relative Height<br>% | Amount<br>n.a. |
| 1                   |           | 5.283                 | 28.973          | 197.440        | 49.83              | 68.21                | n.a.           |
| 2                   |           | 8.297                 | 29.173          | 92.012         | 50.17              | 31.79                | n.a.           |
| <b>Total:</b>       |           |                       | <b>58.145</b>   | <b>289.452</b> | <b>100.00</b>      | <b>100.00</b>        |                |

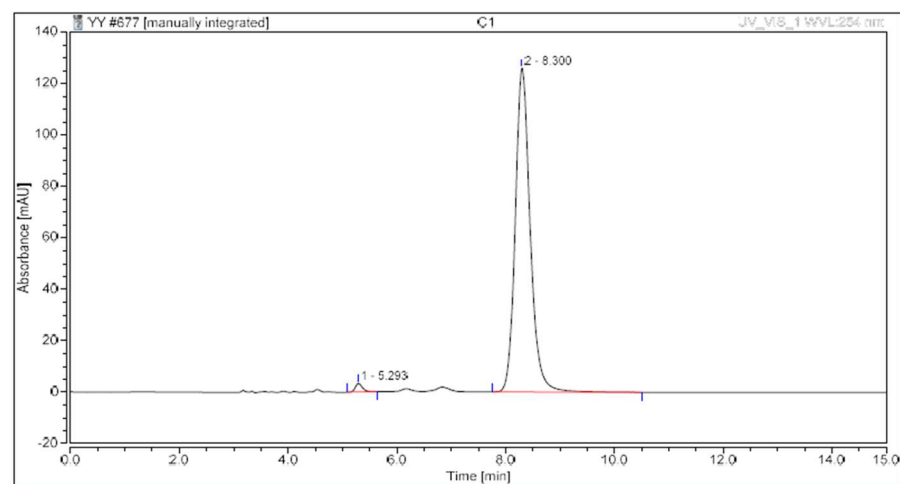

| Integration Results |           |                       |                 |                |                    |                      |                |
|---------------------|-----------|-----------------------|-----------------|----------------|--------------------|----------------------|----------------|
| No.                 | Peak Name | Retention Time<br>min | Area<br>mAU*min | Height<br>mAU  | Relative Area<br>% | Relative Height<br>% | Amount<br>n.a. |
| 1                   |           | 5.293                 | 0.492           | 3.315          | 1.22               | 2.56                 | n.a.           |
| 2                   |           | 8.300                 | 39.962          | 126.105        | 98.78              | 97.44                | n.a.           |
| <b>Total:</b>       |           |                       | <b>40.454</b>   | <b>129.420</b> | <b>100.00</b>      | <b>100.00</b>        |                |

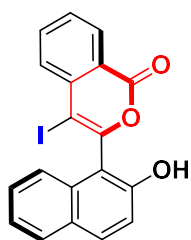

4

HPLC analysis: Chiralcel IB-H (Hexane/*i*-PrOH = 8:2, flow rate = 1.0 mL/min)

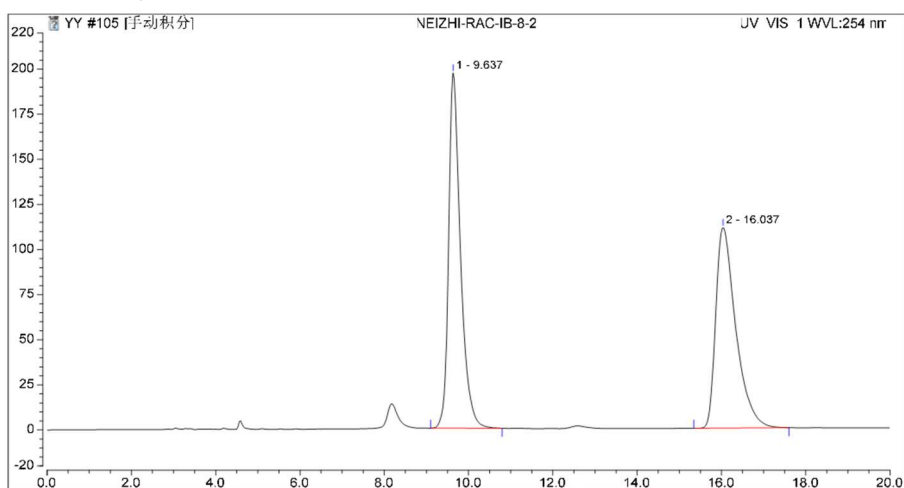

| Integration-Results |          |                      |                 |               |                   |                     |                |
|---------------------|----------|----------------------|-----------------|---------------|-------------------|---------------------|----------------|
| No.                 | PeakName | RetentionTime<br>min | Area<br>mAU*min | Height<br>mAU | RelativeArea<br>% | RelativeHeight<br>% | Amount<br>n.a. |
| 1                   |          | 9.637                | 64.055          | 196.994       | 51.19             | 63.91               | n.a.           |
| 2                   |          | 16.037               | 61.087          | 111.257       | 48.81             | 36.09               | n.a.           |
| Total:              |          |                      | 125.142         | 308.252       | 100.00            | 100.00              |                |

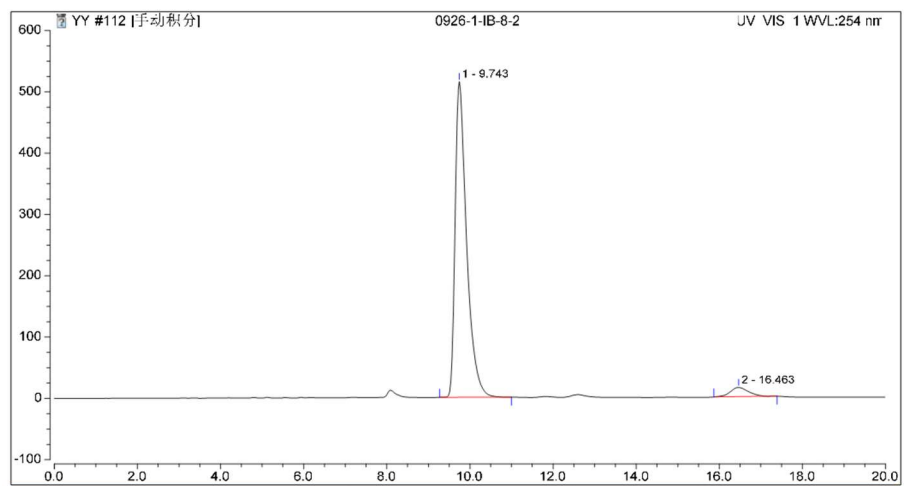

| Integration-Results |          |                      |                 |               |                   |                     |                |
|---------------------|----------|----------------------|-----------------|---------------|-------------------|---------------------|----------------|
| No.                 | PeakName | RetentionTime<br>min | Area<br>mAU*min | Height<br>mAU | RelativeArea<br>% | RelativeHeight<br>% | Amount<br>n.a. |
| 1                   |          | 9.743                | 164.195         | 514.895       | 95.58             | 97.17               | n.a.           |
| 2                   |          | 16.463               | 7.591           | 14.995        | 4.42              | 2.83                | n.a.           |
| Total:              |          |                      | 171.785         | 529.890       | 100.00            | 100.00              |                |

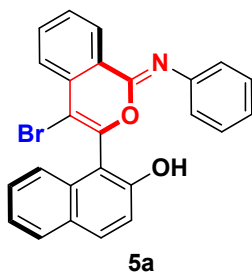

**HPLC analysis:** Chiralcel IC-H (Hexane/*i*-PrOH = 95:5, flow rate = 1.0 mL/min)

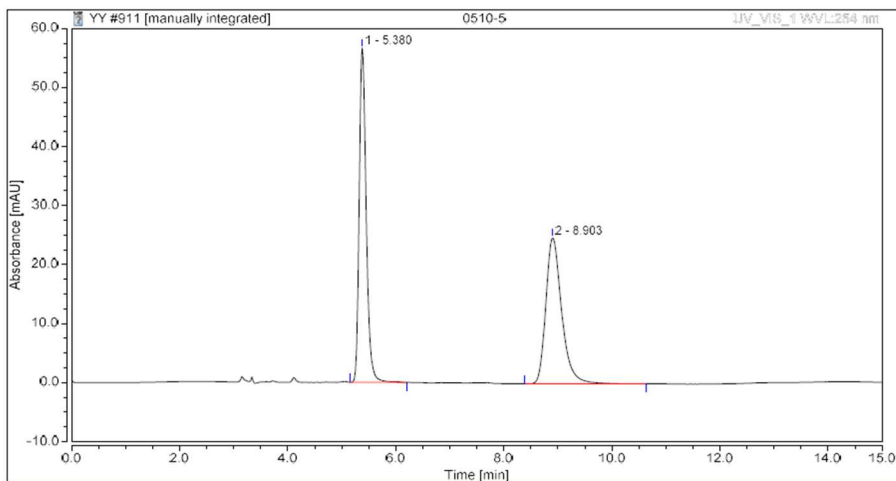

| Integration Results |           |                       |                 |               |                    |                      |                |
|---------------------|-----------|-----------------------|-----------------|---------------|--------------------|----------------------|----------------|
| No.                 | Peak Name | Retention Time<br>min | Area<br>mAU*min | Height<br>mAU | Relative Area<br>% | Relative Height<br>% | Amount<br>n.a. |
| 1                   |           | 5.380                 | 8.455           | 56.680        | 50.15              | 69.60                | n.a.           |
| 2                   |           | 8.903                 | 8.406           | 24.762        | 49.85              | 30.40                | n.a.           |
| <b>Total:</b>       |           |                       | <b>16.861</b>   | <b>81.442</b> | <b>100.00</b>      | <b>100.00</b>        |                |

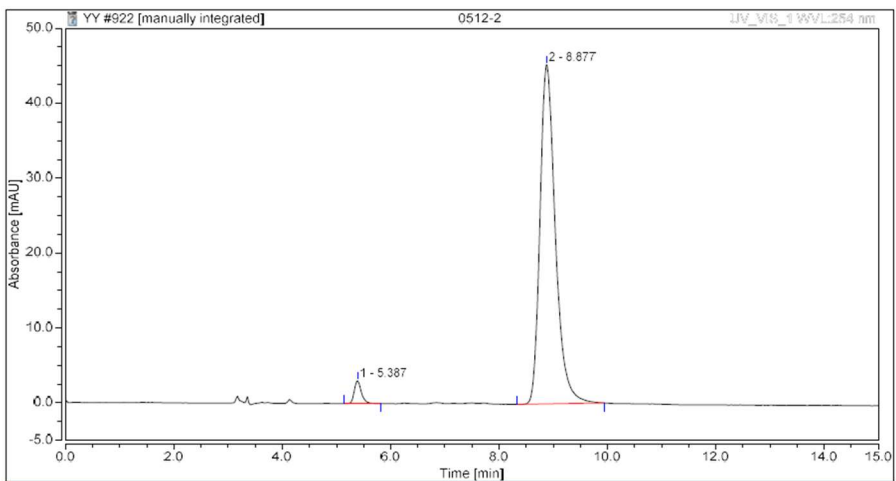

| Integration Results |           |                       |                 |               |                    |                      |                |
|---------------------|-----------|-----------------------|-----------------|---------------|--------------------|----------------------|----------------|
| No.                 | Peak Name | Retention Time<br>min | Area<br>mAU*min | Height<br>mAU | Relative Area<br>% | Relative Height<br>% | Amount<br>n.a. |
| 1                   |           | 5.387                 | 0.462           | 3.066         | 3.01               | 6.33                 | n.a.           |
| 2                   |           | 8.877                 | 14.884          | 45.348        | 96.99              | 93.67                | n.a.           |
| <b>Total:</b>       |           |                       | <b>15.345</b>   | <b>48.414</b> | <b>100.00</b>      | <b>100.00</b>        |                |

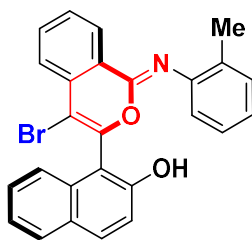

5b

HPLC analysis: Chiralcel IC-H (Hexane/*i*-PrOH = 95:5, flow rate = 1.0 mL/min)

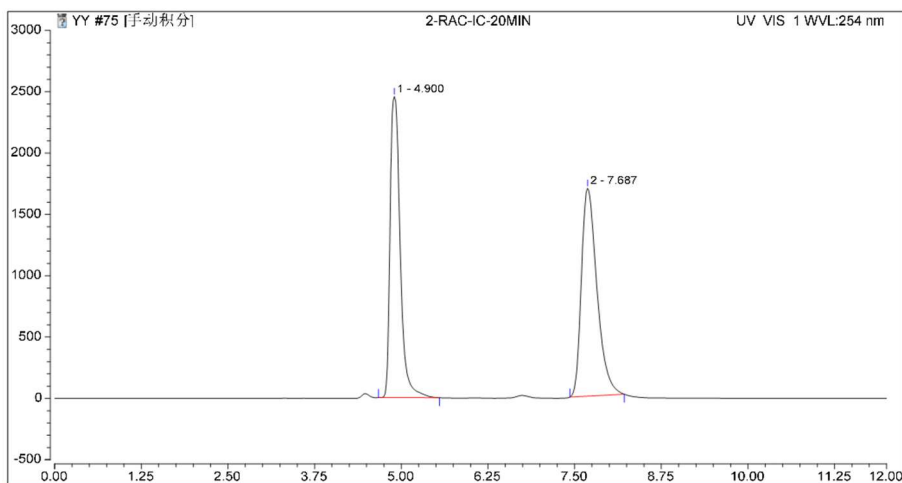

| Integration-Results |          |                      |                 |               |                   |                     |                |
|---------------------|----------|----------------------|-----------------|---------------|-------------------|---------------------|----------------|
| No.                 | PeakName | RetentionTime<br>min | Area<br>mAU*min | Height<br>mAU | RelativeArea<br>% | RelativeHeight<br>% | Amount<br>n.a. |
| 1                   |          | 4.900                | 413.415         | 2454.706      | 48.45             | 59.13               | n.a.           |
| 2                   |          | 7.687                | 439.937         | 1696.421      | 51.55             | 40.87               | n.a.           |
| Total:              |          |                      | 853.351         | 4151.127      | 100.00            | 100.00              |                |

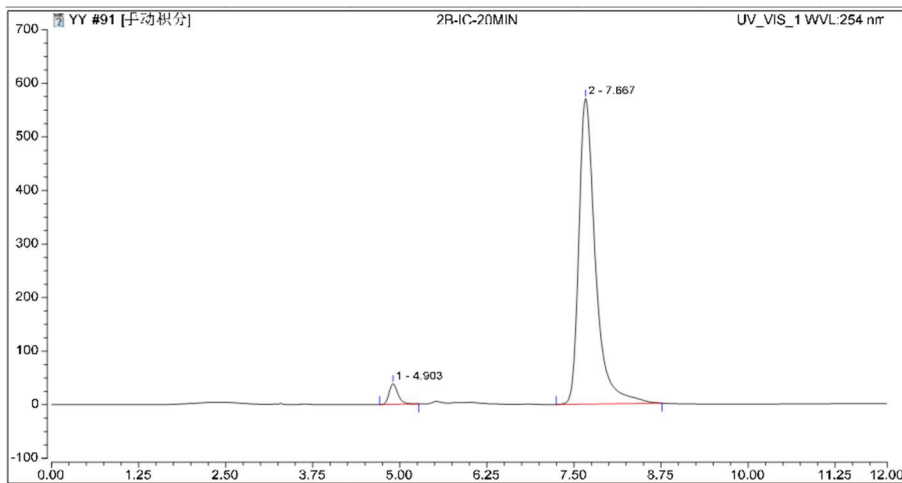

| Integration-Results |          |                      |                 |               |                   |                     |                |
|---------------------|----------|----------------------|-----------------|---------------|-------------------|---------------------|----------------|
| No.                 | PeakName | RetentionTime<br>min | Area<br>mAU*min | Height<br>mAU | RelativeArea<br>% | RelativeHeight<br>% | Amount<br>n.a. |
| 1                   |          | 4.903                | 5.698           | 38.736        | 3.48              | 6.35                | n.a.           |
| 2                   |          | 7.667                | 158.057         | 571.126       | 96.52             | 93.65               | n.a.           |
| Total:              |          |                      | 163.755         | 609.862       | 100.00            | 100.00              |                |

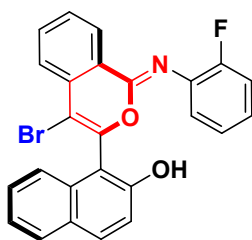

5c

HPLC analysis: Chiralcel IC-H (Hexane/*i*-PrOH = 95:5, flow rate = 1.0 mL/min)

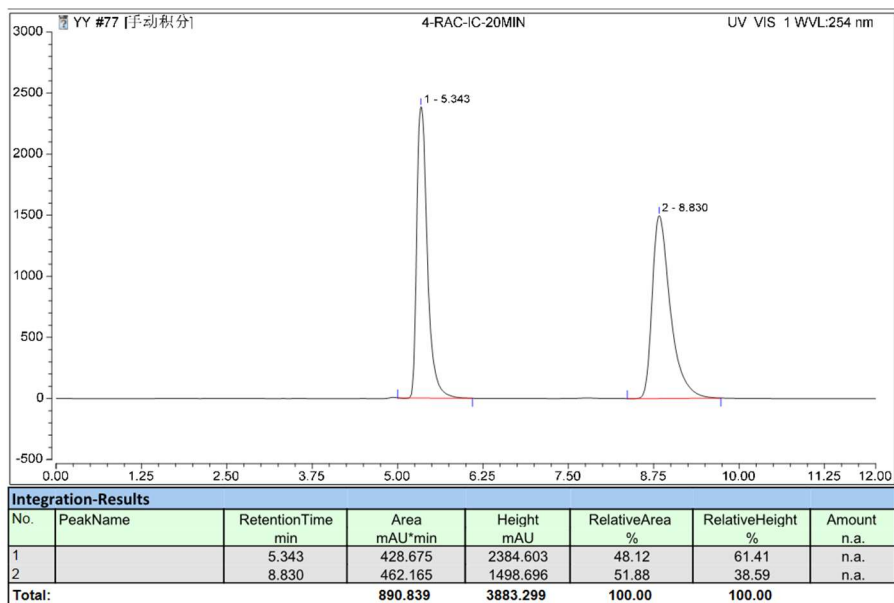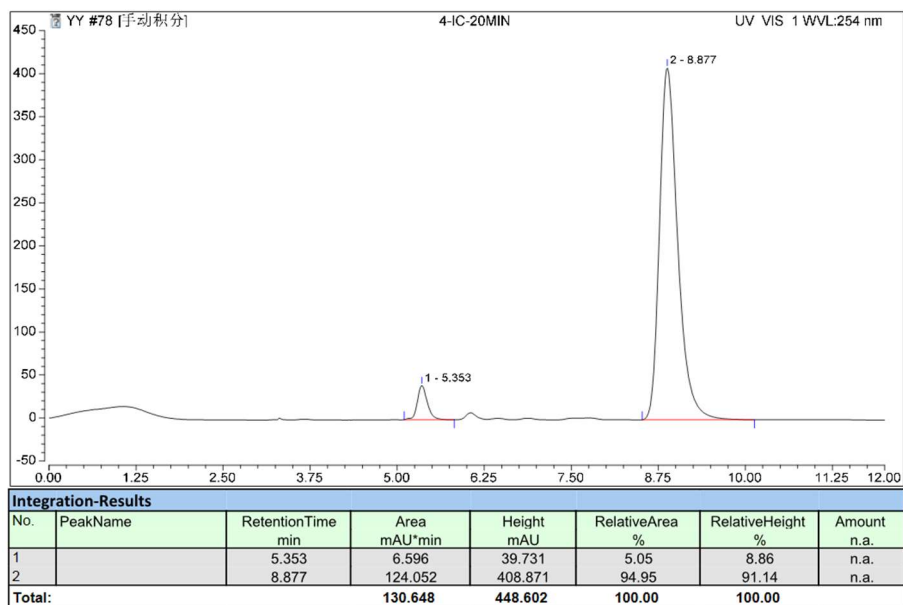

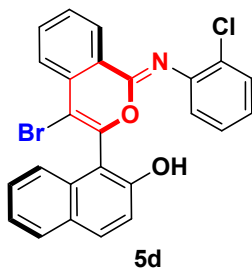

**HPLC analysis:** Chiralcel IC-H (Hexane/*i*-PrOH = 95:5, flow rate = 1.0 mL/min)

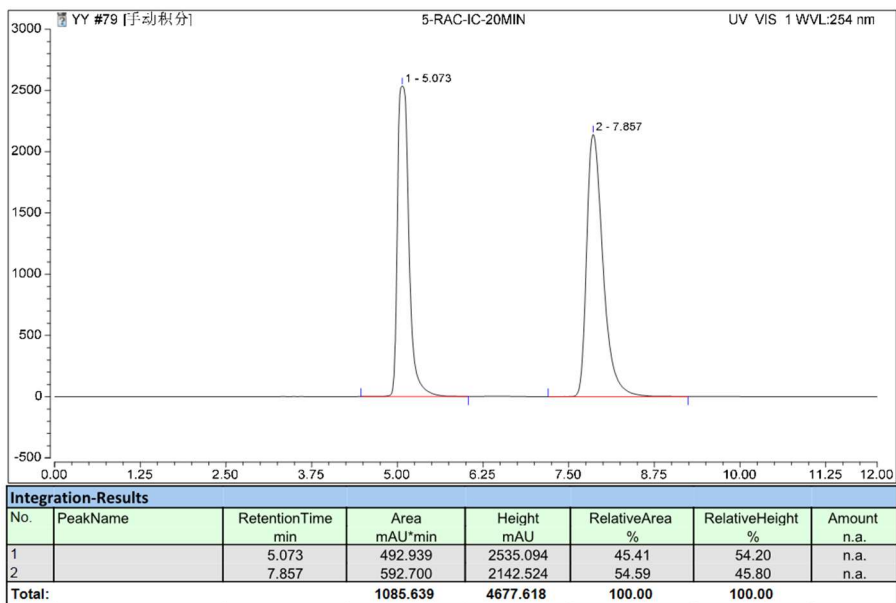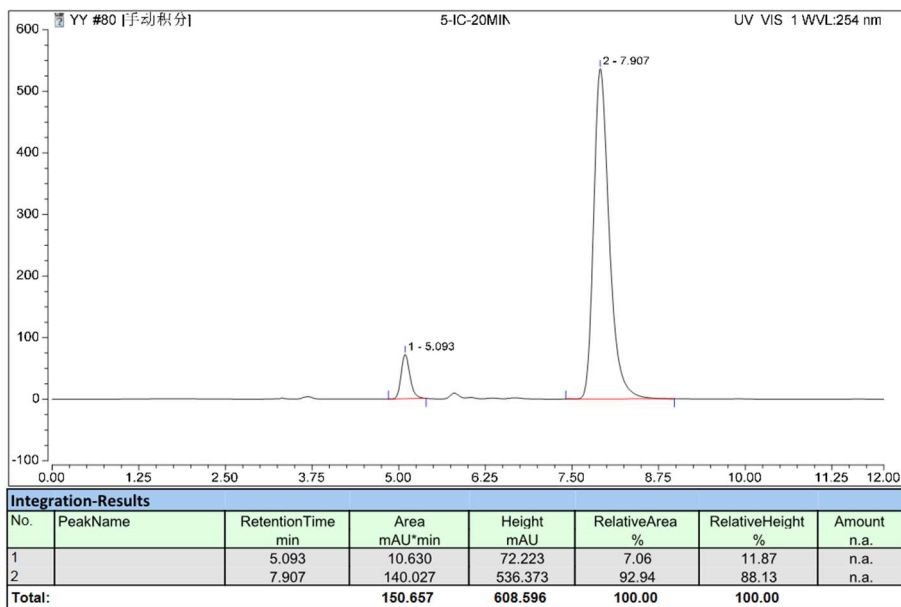

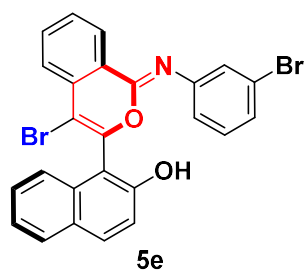

**HPLC analysis:** Chiralcel IC-H (Hexane/*i*-PrOH = 95:5, flow rate = 1.0 mL/min)

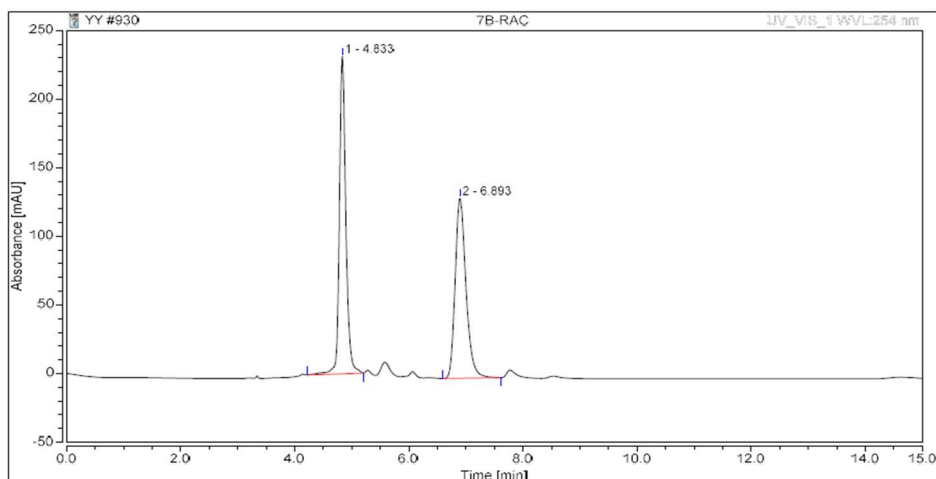

| Integration Results |           |                       |                              |                |                    |                      |                |
|---------------------|-----------|-----------------------|------------------------------|----------------|--------------------|----------------------|----------------|
| No.                 | Peak Name | Retention Time<br>min | Area<br>mAU <sup>2</sup> min | Height<br>mAU  | Relative Area<br>% | Relative Height<br>% | Amount<br>n.a. |
| 1                   |           | 4.833                 | 30.347                       | 231.313        | 51.38              | 63.81                | n.a.           |
| 2                   |           | 6.893                 | 28.722                       | 131.192        | 48.62              | 36.19                | n.a.           |
| <b>Total:</b>       |           |                       | <b>59.068</b>                | <b>362.505</b> | <b>100.00</b>      | <b>100.00</b>        |                |

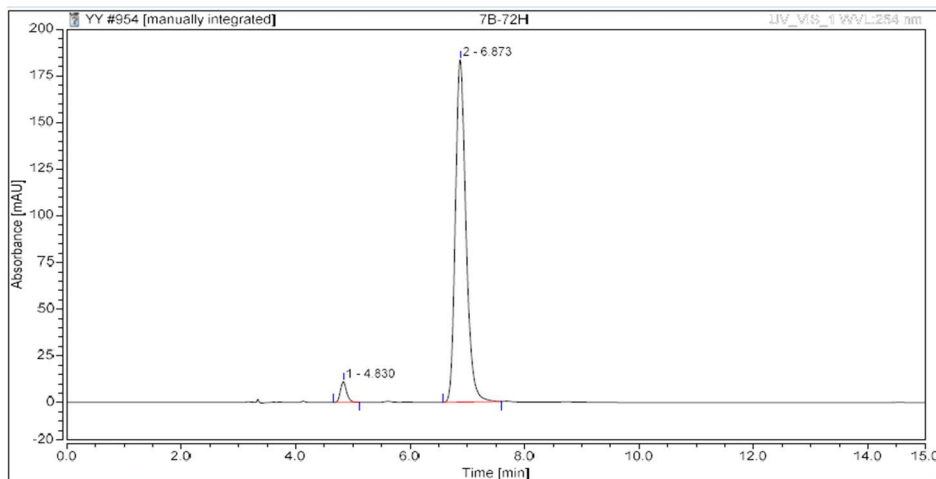

| Integration Results |           |                       |                              |                |                    |                      |                |
|---------------------|-----------|-----------------------|------------------------------|----------------|--------------------|----------------------|----------------|
| No.                 | Peak Name | Retention Time<br>min | Area<br>mAU <sup>2</sup> min | Height<br>mAU  | Relative Area<br>% | Relative Height<br>% | Amount<br>n.a. |
| 1                   |           | 4.830                 | 1.386                        | 11.237         | 3.41               | 5.76                 | n.a.           |
| 2                   |           | 6.873                 | 39.224                       | 183.747        | 96.59              | 94.24                | n.a.           |
| <b>Total:</b>       |           |                       | <b>40.610</b>                | <b>194.984</b> | <b>100.00</b>      | <b>100.00</b>        |                |



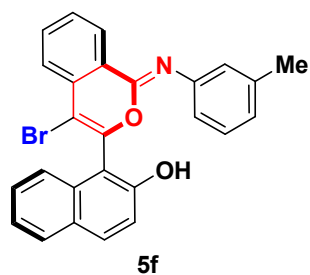

**HPLC analysis:** Chiralcel IC-H (Hexane/*i*-PrOH = 95:5, flow rate = 1.0 mL/min)

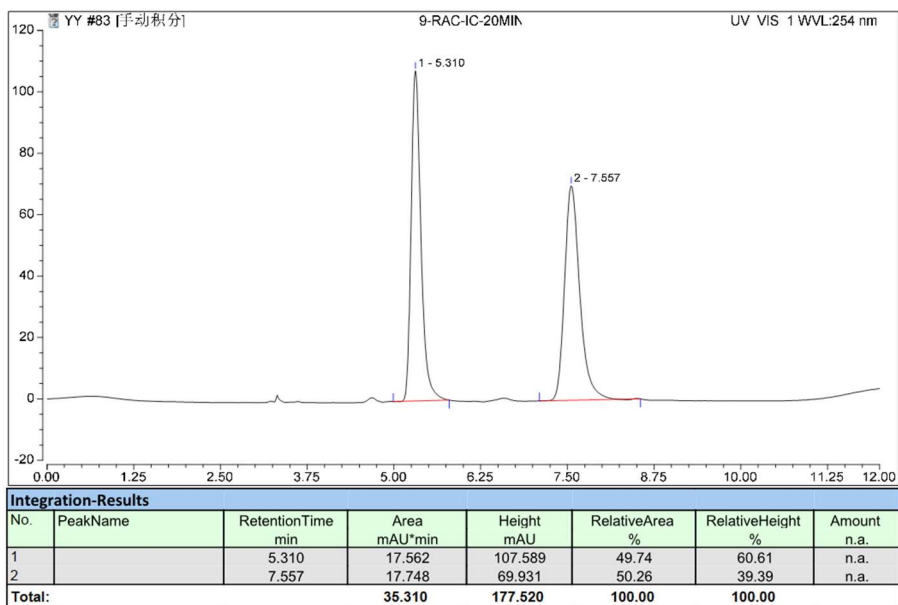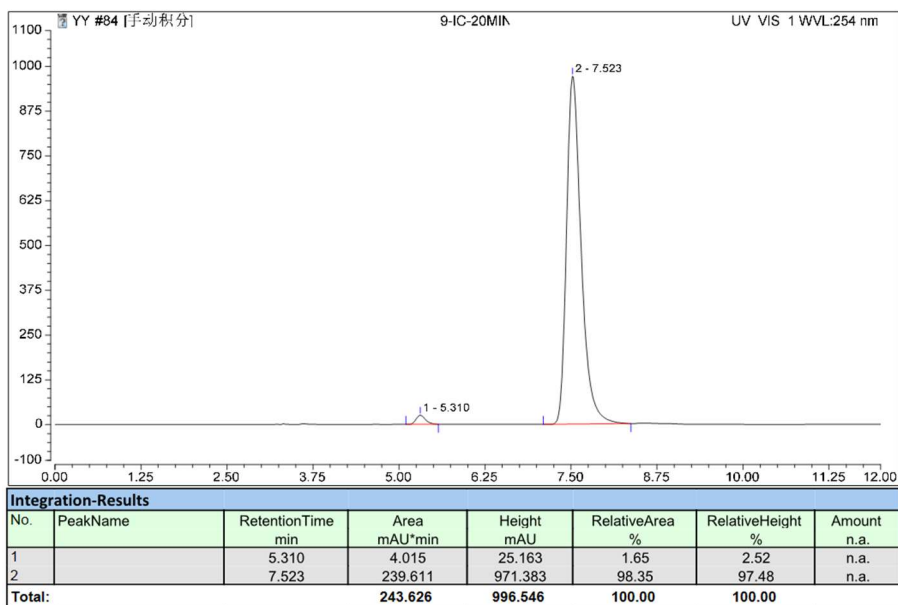

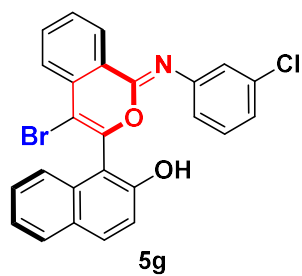

**HPLC analysis:** Chiralcel IC-H (Hexane/*i*-PrOH = 95:5, flow rate = 1.0 mL/min)

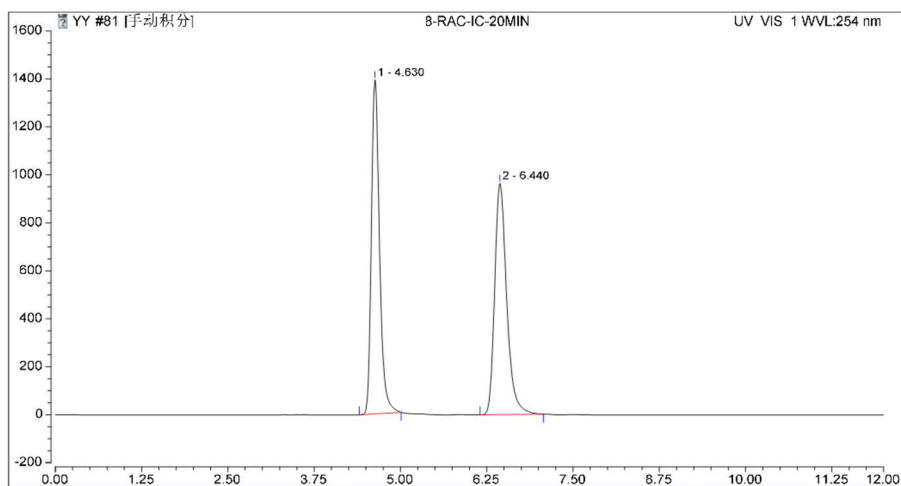

| Integration-Results |          |                      |                 |                 |                   |                     |                |
|---------------------|----------|----------------------|-----------------|-----------------|-------------------|---------------------|----------------|
| No.                 | PeakName | RetentionTime<br>min | Area<br>mAU*min | Height<br>mAU   | RelativeArea<br>% | RelativeHeight<br>% | Amount<br>n.a. |
| 1                   |          | 4.630                | 190.629         | 1392.541        | 49.52             | 59.08               | n.a.           |
| 2                   |          | 6.440                | 194.288         | 964.487         | 50.48             | 40.92               | n.a.           |
| <b>Total:</b>       |          |                      | <b>384.917</b>  | <b>2357.027</b> | <b>100.00</b>     | <b>100.00</b>       |                |

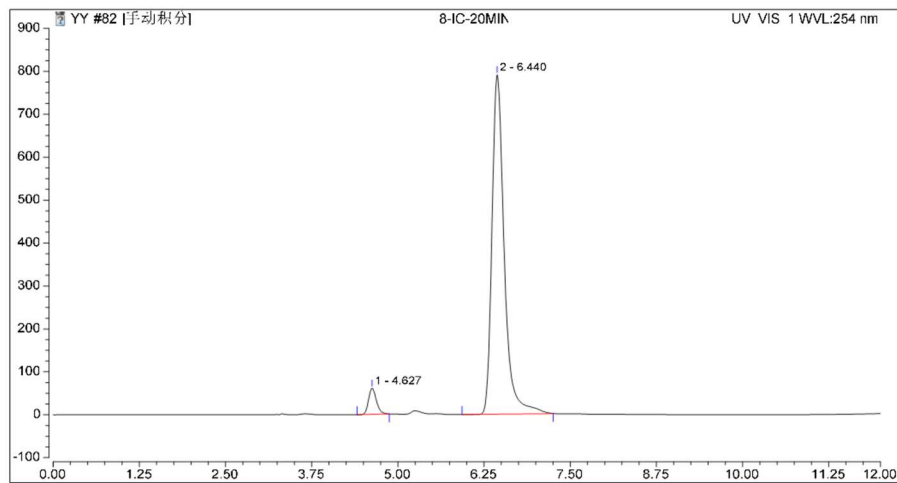

| Integration-Results |          |                      |                 |                |                   |                     |                |
|---------------------|----------|----------------------|-----------------|----------------|-------------------|---------------------|----------------|
| No.                 | PeakName | RetentionTime<br>min | Area<br>mAU*min | Height<br>mAU  | RelativeArea<br>% | RelativeHeight<br>% | Amount<br>n.a. |
| 1                   |          | 4.627                | 8.061           | 60.919         | 4.72              | 7.15                | n.a.           |
| 2                   |          | 6.440                | 162.866         | 790.744        | 95.28             | 92.85               | n.a.           |
| <b>Total:</b>       |          |                      | <b>170.927</b>  | <b>851.663</b> | <b>100.00</b>     | <b>100.00</b>       |                |

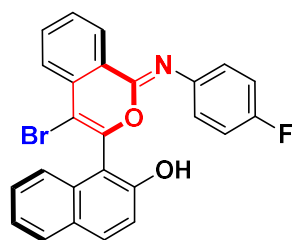

5h

HPLC analysis: Chiralcel IC-H (Hexane/*i*-PrOH = 95:5, flow rate = 1.0 mL/min)

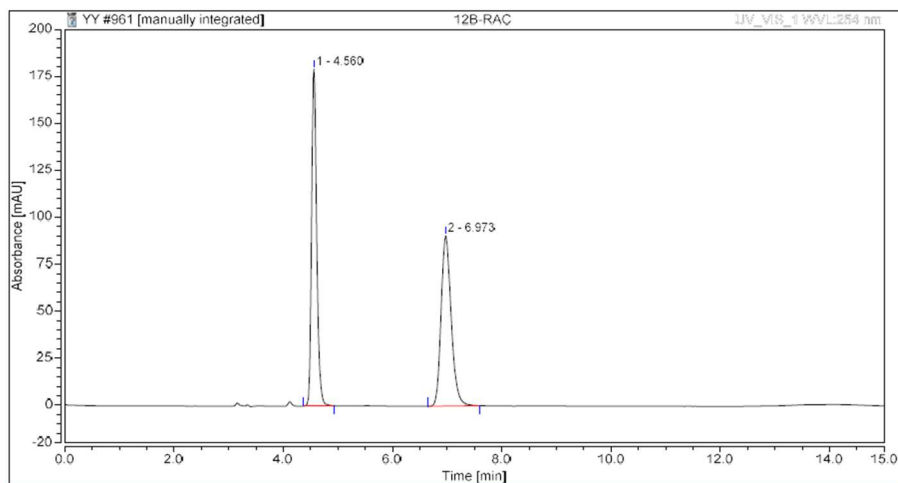

| Integration Results |           |                    |               |                |                 |                   |        |
|---------------------|-----------|--------------------|---------------|----------------|-----------------|-------------------|--------|
| No.                 | Peak Name | Retention Time min | Area mAU*min  | Height mAU     | Relative Area % | Relative Height % | Amount |
| 1                   |           | 4.560              | 19.406        | 179.419        | 50.04           | 66.38             | n.a.   |
| 2                   |           | 6.973              | 19.378        | 90.862         | 49.96           | 33.62             | n.a.   |
| <b>Total:</b>       |           |                    | <b>38.785</b> | <b>270.281</b> | <b>100.00</b>   | <b>100.00</b>     |        |

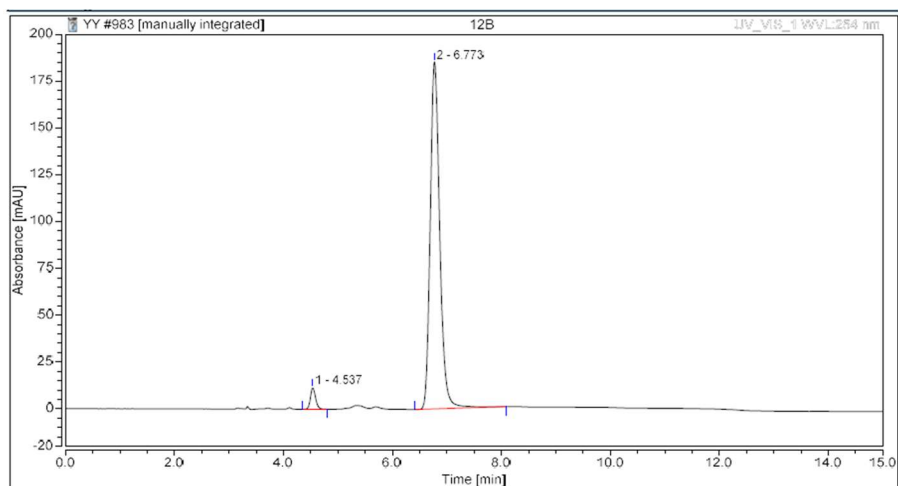

| Integration Results |           |                    |               |                |                 |                   |        |
|---------------------|-----------|--------------------|---------------|----------------|-----------------|-------------------|--------|
| No.                 | Peak Name | Retention Time min | Area mAU*min  | Height mAU     | Relative Area % | Relative Height % | Amount |
| 1                   |           | 4.537              | 1.262         | 11.670         | 3.26            | 5.92              | n.a.   |
| 2                   |           | 6.773              | 37.425        | 185.395        | 96.74           | 94.08             | n.a.   |
| <b>Total:</b>       |           |                    | <b>38.687</b> | <b>197.064</b> | <b>100.00</b>   | <b>100.00</b>     |        |

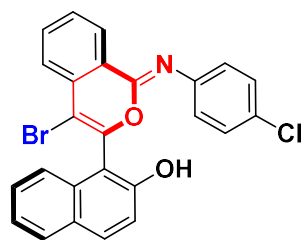

5i

HPLC analysis: Chiralcel IC-H (Hexane/*i*-PrOH = 95:5, flow rate = 1.0 mL/min)

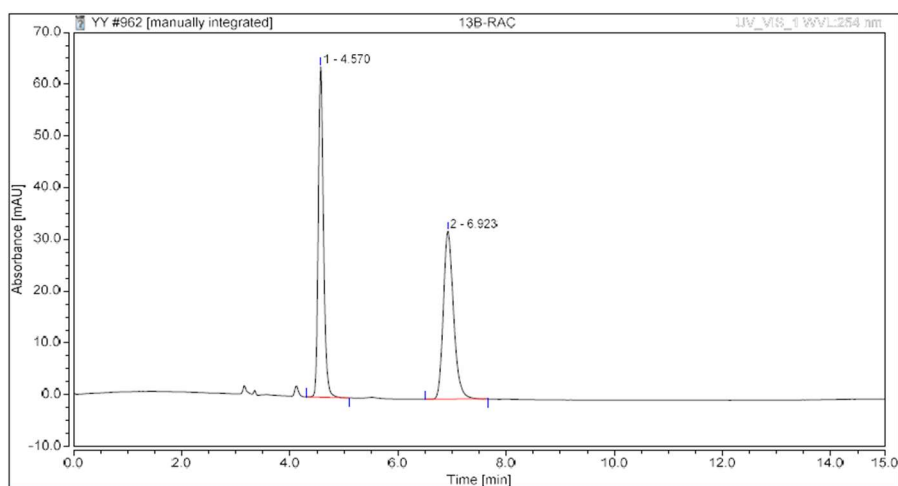

| Integration Results |           |                       |                              |               |                    |                      |                |
|---------------------|-----------|-----------------------|------------------------------|---------------|--------------------|----------------------|----------------|
| No.                 | Peak Name | Retention Time<br>min | Area<br>mAU <sup>2</sup> min | Height<br>mAU | Relative Area<br>% | Relative Height<br>% | Amount<br>n.a. |
| 1                   |           | 4.570                 | 7.149                        | 63.969        | 50.17              | 66.31                | n.a.           |
| 2                   |           | 6.923                 | 7.100                        | 32.503        | 49.83              | 33.69                | n.a.           |
| <b>Total:</b>       |           |                       | <b>14.249</b>                | <b>96.472</b> | <b>100.00</b>      | <b>100.00</b>        |                |

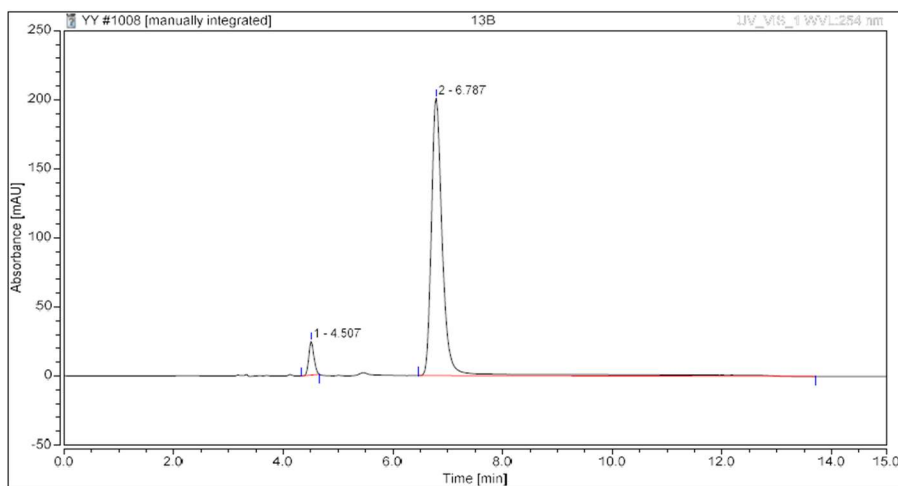

| Integration Results |           |                       |                              |                |                    |                      |                |
|---------------------|-----------|-----------------------|------------------------------|----------------|--------------------|----------------------|----------------|
| No.                 | Peak Name | Retention Time<br>min | Area<br>mAU <sup>2</sup> min | Height<br>mAU  | Relative Area<br>% | Relative Height<br>% | Amount<br>n.a. |
| 1                   |           | 4.507                 | 2.647                        | 24.546         | 4.96               | 10.88                | n.a.           |
| 2                   |           | 6.787                 | 50.665                       | 201.068        | 95.04              | 89.12                | n.a.           |
| <b>Total:</b>       |           |                       | <b>53.312</b>                | <b>225.614</b> | <b>100.00</b>      | <b>100.00</b>        |                |

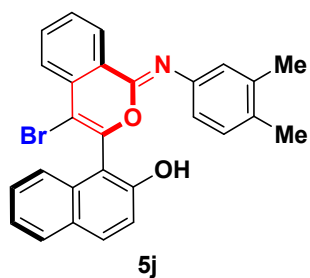

**HPLC analysis:** Chiralcel IC-H (Hexane/*i*-PrOH = 95:5, flow rate = 1.0 mL/min)

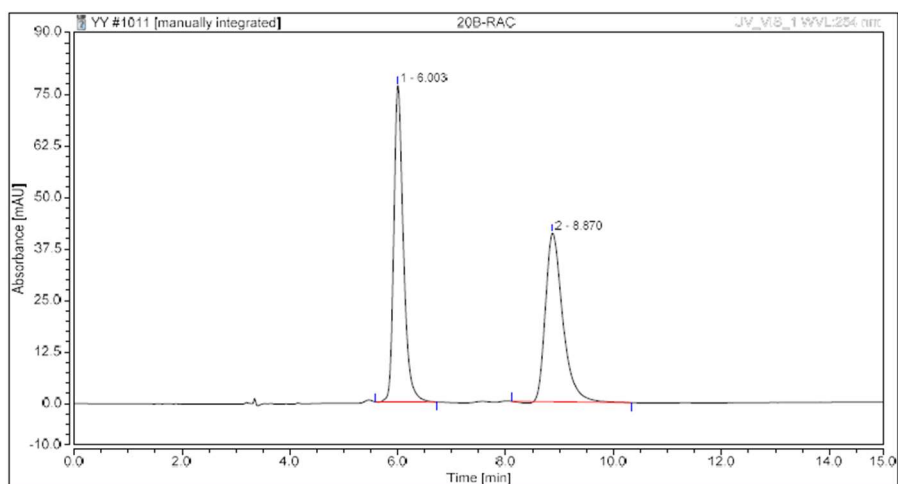

| Integration Results |           |                       |                              |                |                    |                      |                |
|---------------------|-----------|-----------------------|------------------------------|----------------|--------------------|----------------------|----------------|
| No.                 | Peak Name | Retention Time<br>min | Area<br>mAU <sup>2</sup> min | Height<br>mAU  | Relative Area<br>% | Relative Height<br>% | Amount<br>n.a. |
| 1                   |           | 6.003                 | 15.795                       | 76.727         | 51.08              | 65.22                | n.a.           |
| 2                   |           | 8.870                 | 15.124                       | 40.919         | 48.92              | 34.78                | n.a.           |
| <b>Total:</b>       |           |                       | <b>30.920</b>                | <b>117.646</b> | <b>100.00</b>      | <b>100.00</b>        |                |

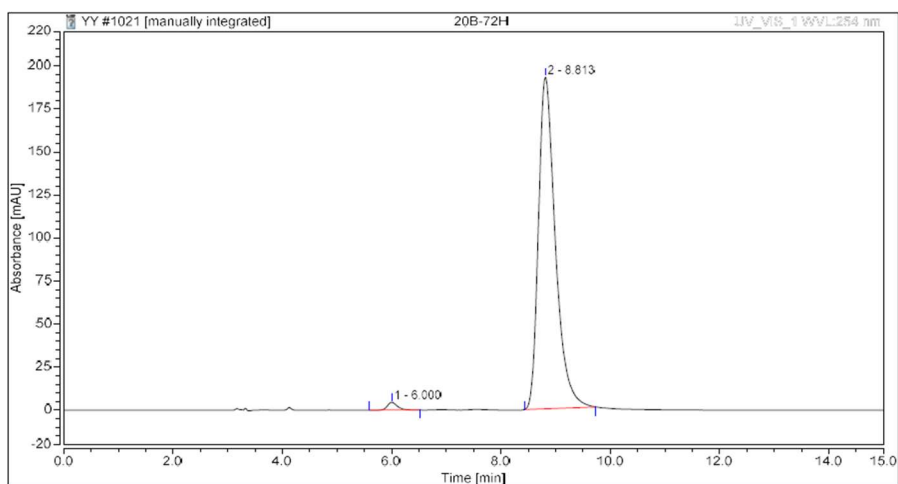

| Integration Results |           |                       |                              |                |                    |                      |                |
|---------------------|-----------|-----------------------|------------------------------|----------------|--------------------|----------------------|----------------|
| No.                 | Peak Name | Retention Time<br>min | Area<br>mAU <sup>2</sup> min | Height<br>mAU  | Relative Area<br>% | Relative Height<br>% | Amount<br>n.a. |
| 1                   |           | 6.000                 | 0.927                        | 4.454          | 1.33               | 2.26                 | n.a.           |
| 2                   |           | 8.813                 | 68.987                       | 192.723        | 98.67              | 97.74                | n.a.           |
| <b>Total:</b>       |           |                       | <b>69.914</b>                | <b>197.177</b> | <b>100.00</b>      | <b>100.00</b>        |                |

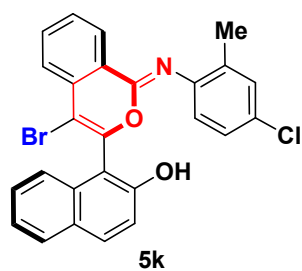

**HPLC analysis:** Chiralcel IC-H (Hexane/*i*-PrOH = 95:5, flow rate = 1.0 mL/min)

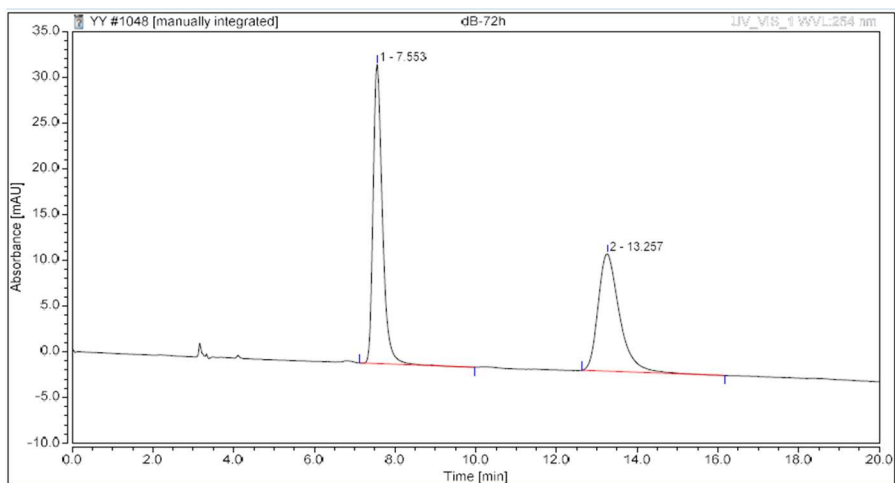

| Integration Results |           |                       |                 |               |                    |                      |                |
|---------------------|-----------|-----------------------|-----------------|---------------|--------------------|----------------------|----------------|
| No.                 | Peak Name | Retention Time<br>min | Area<br>mAU*min | Height<br>mAU | Relative Area<br>% | Relative Height<br>% | Amount<br>n.a. |
| 1                   |           | 7.553                 | 8.638           | 32.719        | 52.30              | 71.83                | n.a.           |
| 2                   |           | 13.257                | 7.877           | 12.831        | 47.70              | 28.17                | n.a.           |
| <b>Total:</b>       |           |                       | <b>16.515</b>   | <b>45.550</b> | <b>100.00</b>      | <b>100.00</b>        |                |

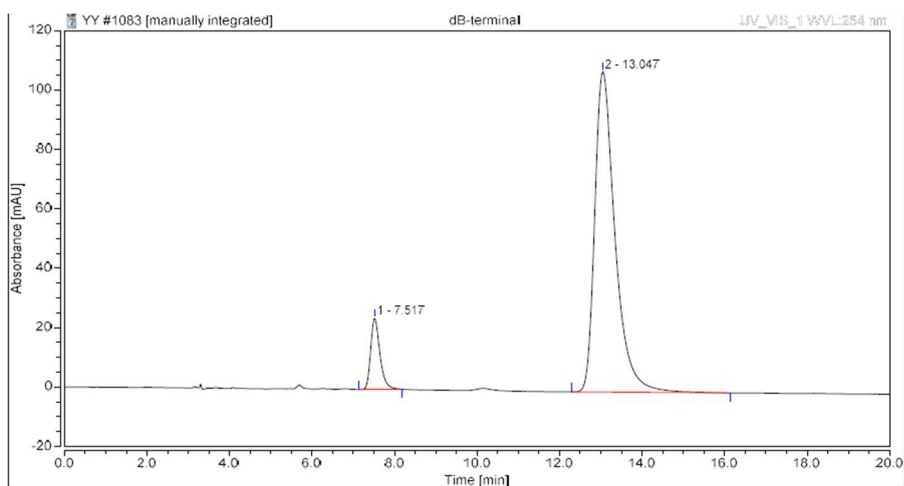

| Integration Results |           |                       |                 |                |                    |                      |                |
|---------------------|-----------|-----------------------|-----------------|----------------|--------------------|----------------------|----------------|
| No.                 | Peak Name | Retention Time<br>min | Area<br>mAU*min | Height<br>mAU  | Relative Area<br>% | Relative Height<br>% | Amount<br>n.a. |
| 1                   |           | 7.517                 | 6.177           | 23.993         | 9.11               | 18.19                | n.a.           |
| 2                   |           | 13.047                | 61.653          | 107.933        | 90.89              | 81.81                | n.a.           |
| <b>Total:</b>       |           |                       | <b>67.830</b>   | <b>131.926</b> | <b>100.00</b>      | <b>100.00</b>        |                |

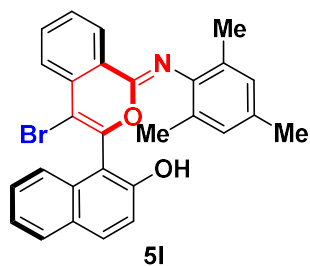

**HPLC analysis:** Chiralcel IC-H (Hexane/*i*-PrOH = 95:5, flow rate = 1.0 mL/min)

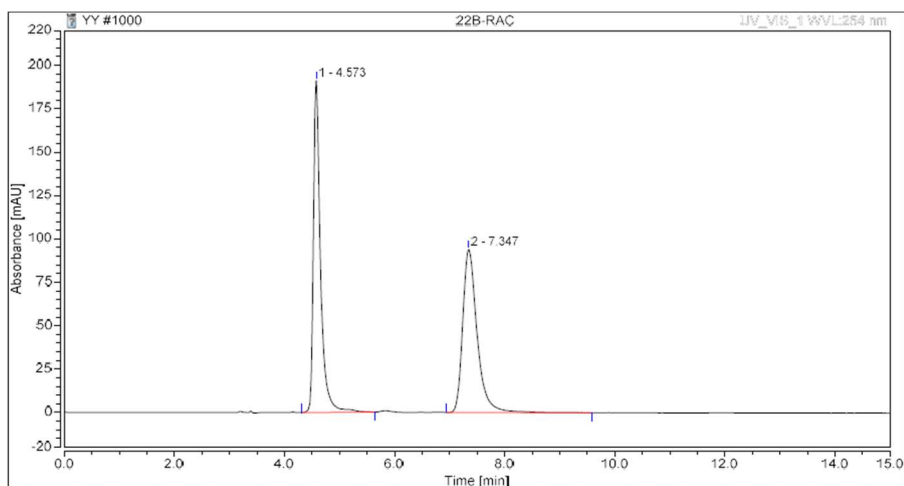

| Integration Results |           |                       |                 |                |                    |                      |                |
|---------------------|-----------|-----------------------|-----------------|----------------|--------------------|----------------------|----------------|
| No.                 | Peak Name | Retention Time<br>min | Area<br>mAU*min | Height<br>mAU  | Relative Area<br>% | Relative Height<br>% | Amount<br>n.a. |
| 1                   |           | 4.573                 | 28.642          | 191.295        | 50.16              | 67.02                | n.a.           |
| 2                   |           | 7.347                 | 28.459          | 94.150         | 49.84              | 32.98                | n.a.           |
| <b>Total:</b>       |           |                       | <b>57.101</b>   | <b>285.445</b> | <b>100.00</b>      | <b>100.00</b>        |                |

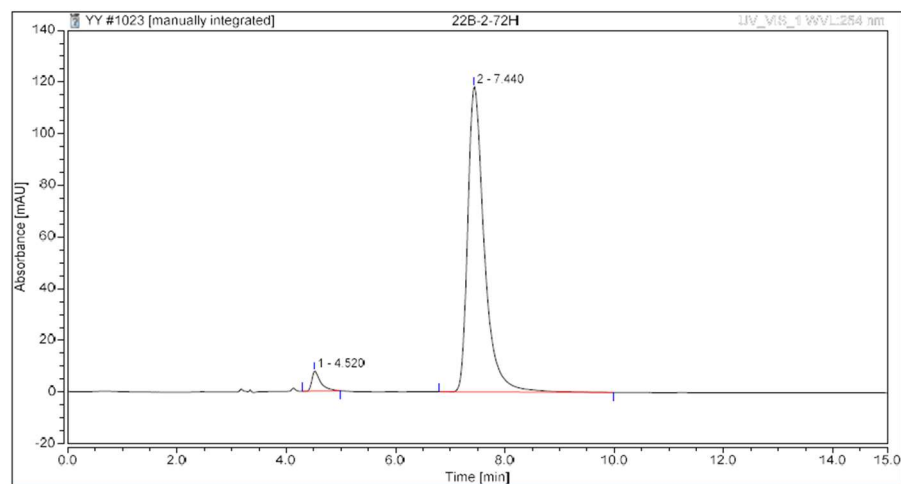

| Integration Results |           |                       |                 |                |                    |                      |                |
|---------------------|-----------|-----------------------|-----------------|----------------|--------------------|----------------------|----------------|
| No.                 | Peak Name | Retention Time<br>min | Area<br>mAU*min | Height<br>mAU  | Relative Area<br>% | Relative Height<br>% | Amount<br>n.a. |
| 1                   |           | 4.520                 | 1.437           | 7.835          | 3.35               | 6.20                 | n.a.           |
| 2                   |           | 7.440                 | 41.526          | 118.453        | 96.65              | 93.80                | n.a.           |
| <b>Total:</b>       |           |                       | <b>42.963</b>   | <b>126.288</b> | <b>100.00</b>      | <b>100.00</b>        |                |

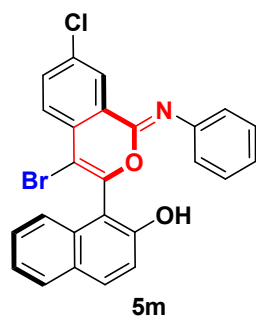

**HPLC analysis:** Chiralcel IC-H (Hexane/*i*-PrOH = 95:5, flow rate = 1.0 mL/min)

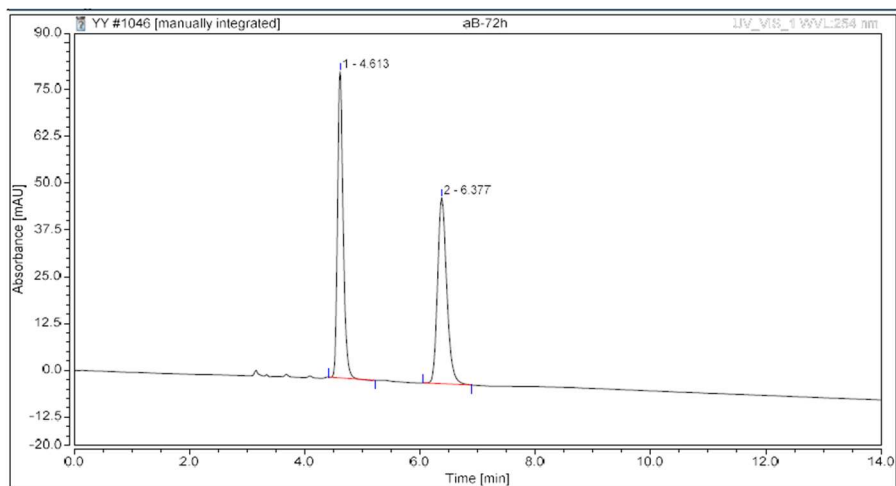

| Integration Results |           |                       |                 |                |                    |                      |                |
|---------------------|-----------|-----------------------|-----------------|----------------|--------------------|----------------------|----------------|
| No.                 | Peak Name | Retention Time<br>min | Area<br>mAU*min | Height<br>mAU  | Relative Area<br>% | Relative Height<br>% | Amount<br>n.a. |
| 1                   |           | 4.613                 | 9.244           | 81.888         | 50.08              | 62.20                | n.a.           |
| 2                   |           | 6.377                 | 9.213           | 49.758         | 49.92              | 37.80                | n.a.           |
| <b>Total:</b>       |           |                       | <b>18.457</b>   | <b>131.646</b> | <b>100.00</b>      | <b>100.00</b>        |                |

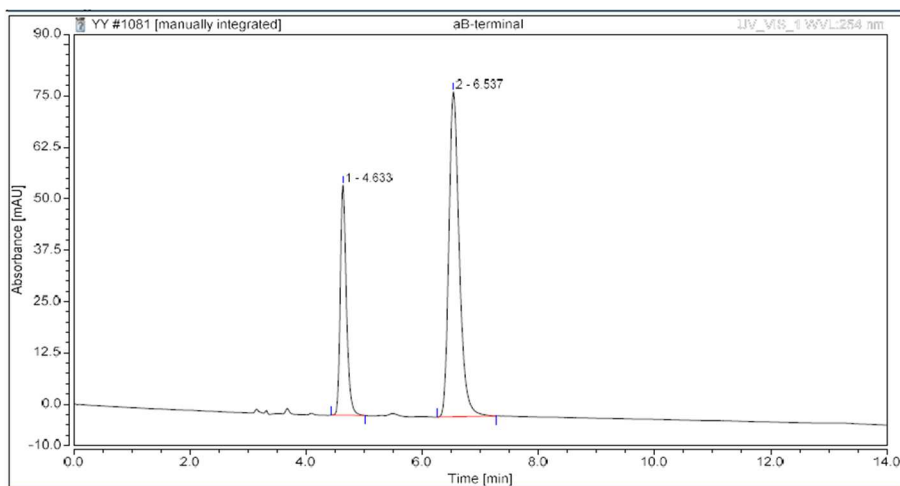

| Integration Results |           |                       |                 |                |                    |                      |                |
|---------------------|-----------|-----------------------|-----------------|----------------|--------------------|----------------------|----------------|
| No.                 | Peak Name | Retention Time<br>min | Area<br>mAU*min | Height<br>mAU  | Relative Area<br>% | Relative Height<br>% | Amount<br>n.a. |
| 1                   |           | 4.633                 | 6.807           | 56.026         | 29.32              | 41.46                | n.a.           |
| 2                   |           | 6.537                 | 16.407          | 79.098         | 70.68              | 58.54                | n.a.           |
| <b>Total:</b>       |           |                       | <b>23.214</b>   | <b>135.124</b> | <b>100.00</b>      | <b>100.00</b>        |                |



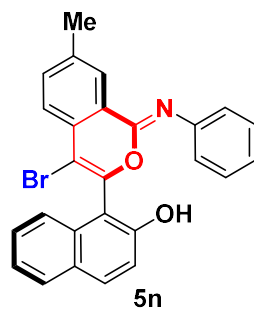

**HPLC analysis:** Chiralcel IC-H (Hexane/*i*-PrOH = 95:5, flow rate = 1.0 mL/min)

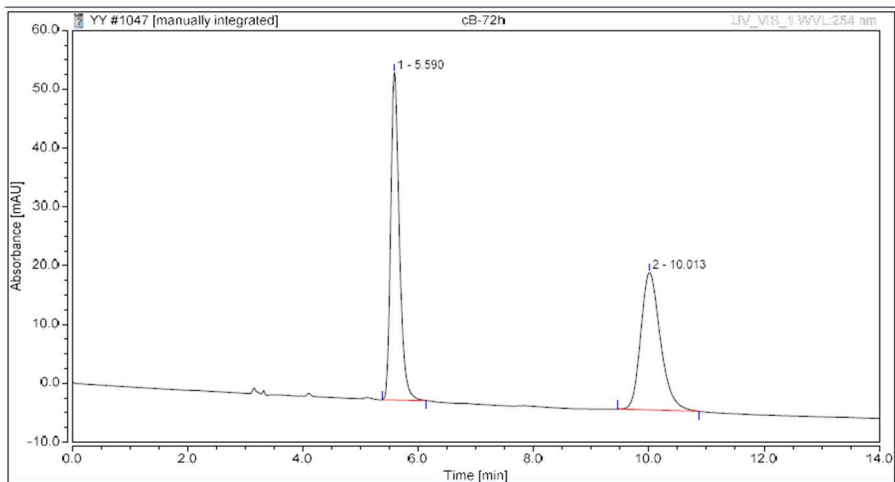

| Integration Results |           |                    |               |               |                 |                   |             |
|---------------------|-----------|--------------------|---------------|---------------|-----------------|-------------------|-------------|
| No.                 | Peak Name | Retention Time min | Area mAU*min  | Height mAU    | Relative Area % | Relative Height % | Amount n.a. |
| 1                   |           | 5.590              | 9.658         | 55.738        | 51.18           | 70.44             | n.a.        |
| 2                   |           | 10.013             | 9.213         | 23.388        | 48.82           | 29.56             | n.a.        |
| <b>Total:</b>       |           |                    | <b>18.871</b> | <b>79.127</b> | <b>100.00</b>   | <b>100.00</b>     |             |

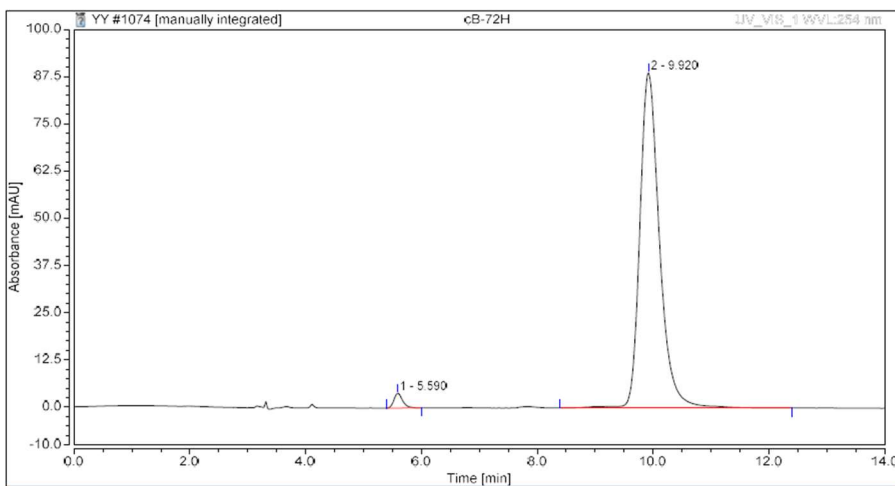

| Integration Results |           |                    |               |               |                 |                   |             |
|---------------------|-----------|--------------------|---------------|---------------|-----------------|-------------------|-------------|
| No.                 | Peak Name | Retention Time min | Area mAU*min  | Height mAU    | Relative Area % | Relative Height % | Amount n.a. |
| 1                   |           | 5.590              | 0.684         | 3.914         | 1.91            | 4.22              | n.a.        |
| 2                   |           | 9.920              | 35.088        | 88.911        | 98.09           | 95.78             | n.a.        |
| <b>Total:</b>       |           |                    | <b>35.772</b> | <b>92.826</b> | <b>100.00</b>   | <b>100.00</b>     |             |

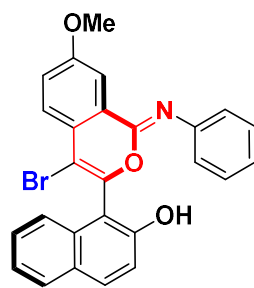

5o

HPLC analysis: Chiralcel IC-H (Hexane/*i*-PrOH = 95:5, flow rate = 1.0 mL/min)

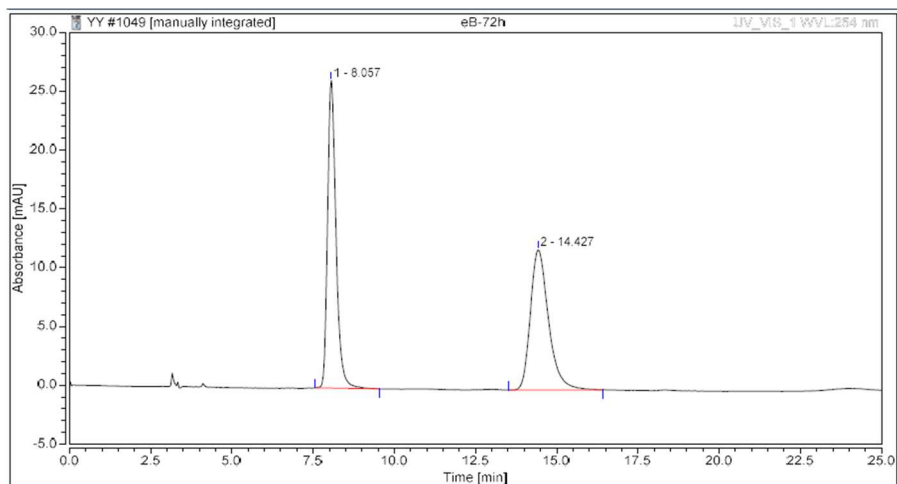

| Integration Results |           |                    |               |               |                 |                   |             |
|---------------------|-----------|--------------------|---------------|---------------|-----------------|-------------------|-------------|
| No.                 | Peak Name | Retention Time min | Area mAU*min  | Height mAU    | Relative Area % | Relative Height % | Amount n.a. |
| 1                   |           | 8.057              | 7.872         | 26.173        | 50.52           | 68.69             | n.a.        |
| 2                   |           | 14.427             | 7.710         | 11.931        | 49.48           | 31.31             | n.a.        |
| <b>Total:</b>       |           |                    | <b>15.581</b> | <b>38.104</b> | <b>100.00</b>   | <b>100.00</b>     |             |

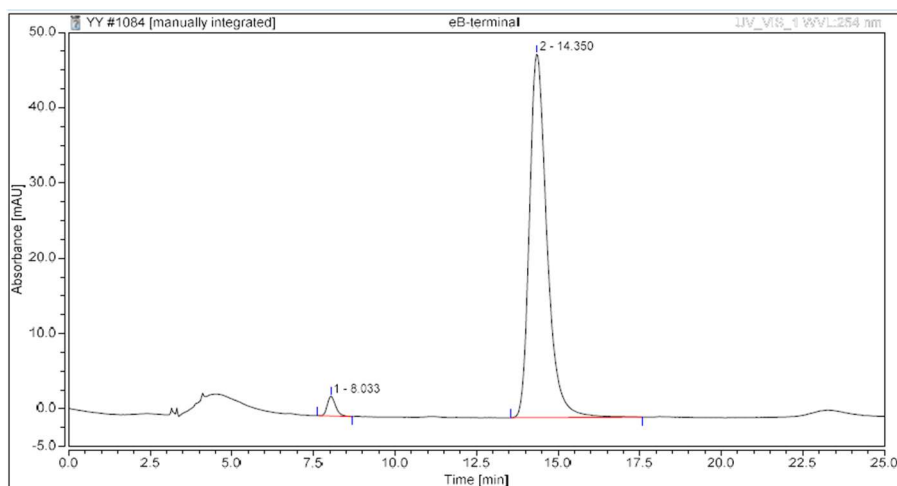

| Integration Results |           |                    |               |               |                 |                   |             |
|---------------------|-----------|--------------------|---------------|---------------|-----------------|-------------------|-------------|
| No.                 | Peak Name | Retention Time min | Area mAU*min  | Height mAU    | Relative Area % | Relative Height % | Amount n.a. |
| 1                   |           | 8.033              | 0.766         | 2.636         | 2.48            | 5.17              | n.a.        |
| 2                   |           | 14.350             | 30.085        | 48.377        | 97.52           | 94.83             | n.a.        |
| <b>Total:</b>       |           |                    | <b>30.851</b> | <b>51.013</b> | <b>100.00</b>   | <b>100.00</b>     |             |

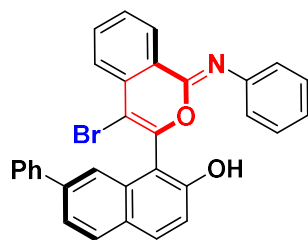

5p

HPLC analysis: Chiralcel IC-H (Hexane/*i*-PrOH = 95:5, flow rate = 1.0 mL/min)

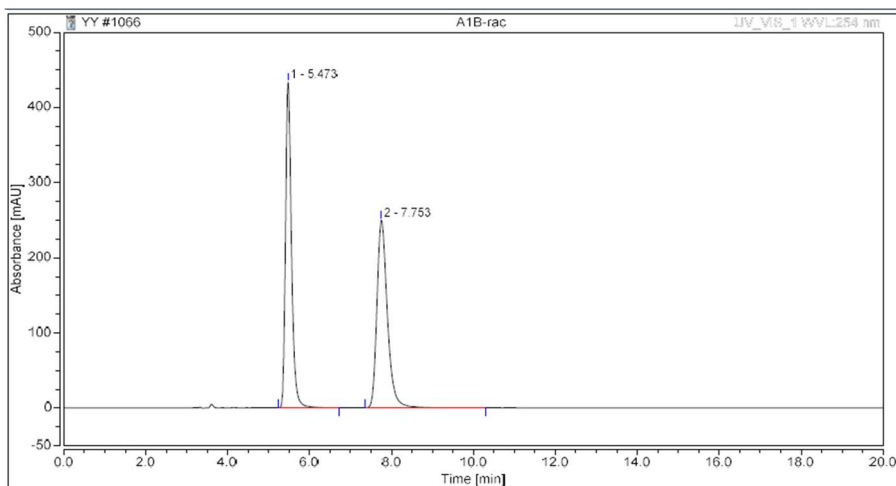

| Integration Results |           |                       |                              |                |                    |                      |                |
|---------------------|-----------|-----------------------|------------------------------|----------------|--------------------|----------------------|----------------|
| No.                 | Peak Name | Retention Time<br>min | Area<br>mAU <sup>2</sup> min | Height<br>mAU  | Relative Area<br>% | Relative Height<br>% | Amount<br>n.a. |
| 1                   |           | 5.473                 | 73.580                       | 434.088        | 49.93              | 63.42                | n.a.           |
| 2                   |           | 7.753                 | 73.772                       | 250.386        | 50.07              | 36.58                | n.a.           |
| <b>Total:</b>       |           |                       | <b>147.351</b>               | <b>684.474</b> | <b>100.00</b>      | <b>100.00</b>        |                |

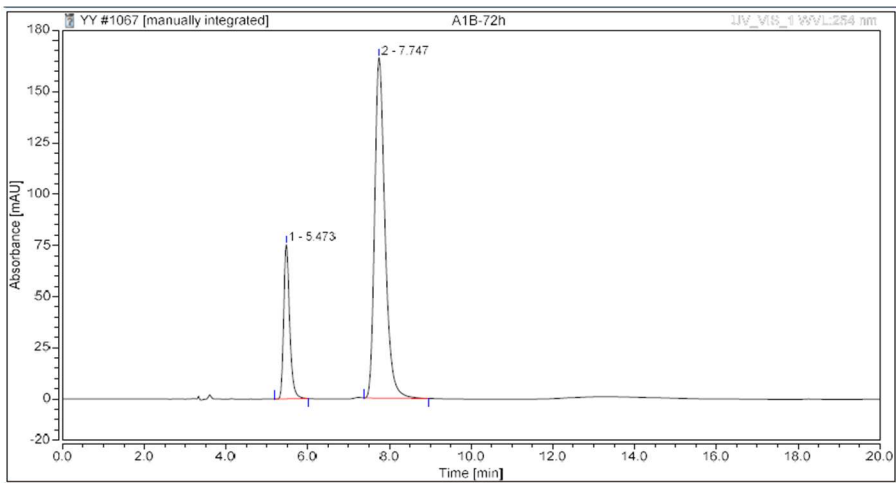

| Integration Results |           |                       |                              |                |                    |                      |                |
|---------------------|-----------|-----------------------|------------------------------|----------------|--------------------|----------------------|----------------|
| No.                 | Peak Name | Retention Time<br>min | Area<br>mAU <sup>2</sup> min | Height<br>mAU  | Relative Area<br>% | Relative Height<br>% | Amount<br>n.a. |
| 1                   |           | 5.473                 | 12.831                       | 75.406         | 20.90              | 31.21                | n.a.           |
| 2                   |           | 7.747                 | 48.574                       | 166.229        | 79.10              | 68.79                | n.a.           |
| <b>Total:</b>       |           |                       | <b>61.406</b>                | <b>241.635</b> | <b>100.00</b>      | <b>100.00</b>        |                |

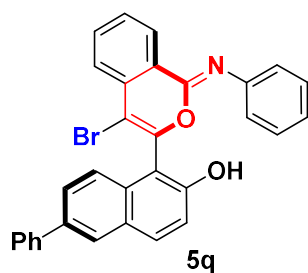

**HPLC analysis:** Chiralcel IC-H (Hexane/*i*-PrOH = 95:5, flow rate = 1.0 mL/min)

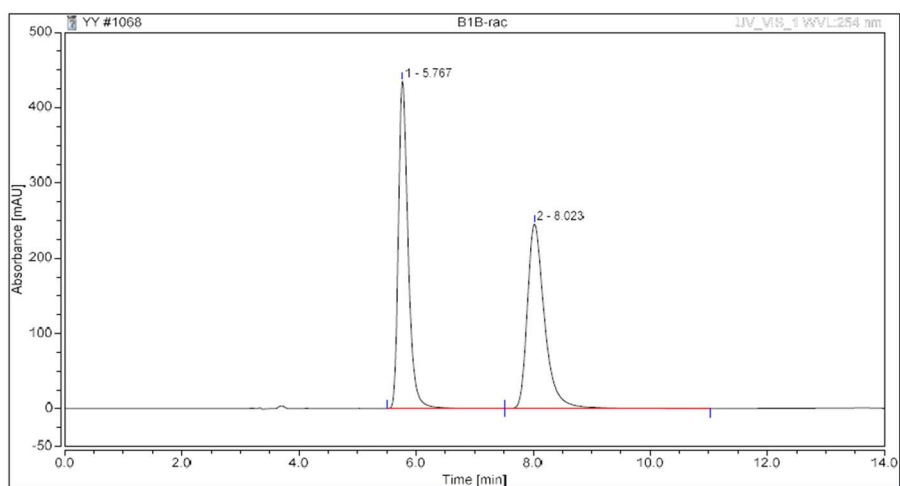

| Integration Results |           |                       |                 |                |                    |                      |                |
|---------------------|-----------|-----------------------|-----------------|----------------|--------------------|----------------------|----------------|
| No.                 | Peak Name | Retention Time<br>min | Area<br>mAU*min | Height<br>mAU  | Relative Area<br>% | Relative Height<br>% | Amount<br>n.a. |
| 1                   |           | 5.767                 | 83.928          | 435.545        | 50.00              | 63.93                | n.a.           |
| 2                   |           | 8.023                 | 83.926          | 245.750        | 50.00              | 36.07                | n.a.           |
| <b>Total:</b>       |           |                       | <b>167.854</b>  | <b>681.295</b> | <b>100.00</b>      | <b>100.00</b>        |                |

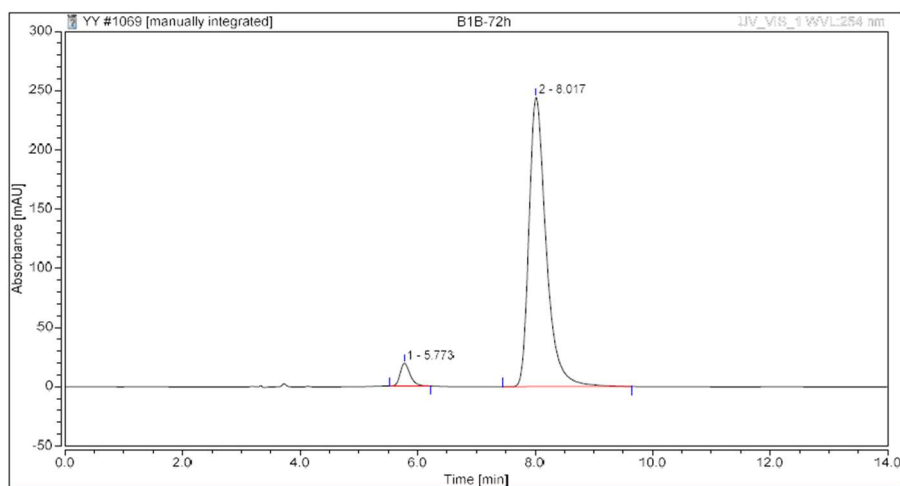

| Integration Results |           |                       |                 |                |                    |                      |                |
|---------------------|-----------|-----------------------|-----------------|----------------|--------------------|----------------------|----------------|
| No.                 | Peak Name | Retention Time<br>min | Area<br>mAU*min | Height<br>mAU  | Relative Area<br>% | Relative Height<br>% | Amount<br>n.a. |
| 1                   |           | 5.773                 | 3.774           | 19.367         | 4.36               | 7.34                 | n.a.           |
| 2                   |           | 8.017                 | 82.865          | 244.658        | 95.64              | 92.66                | n.a.           |
| <b>Total:</b>       |           |                       | <b>86.639</b>   | <b>264.025</b> | <b>100.00</b>      | <b>100.00</b>        |                |

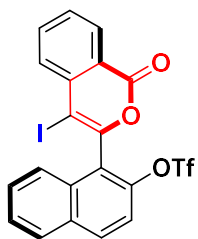

6

HPLC analysis: Chiralcel IG-H (Hexane/*i*-PrOH = 8:2, flow rate = 1.0 mL/min)

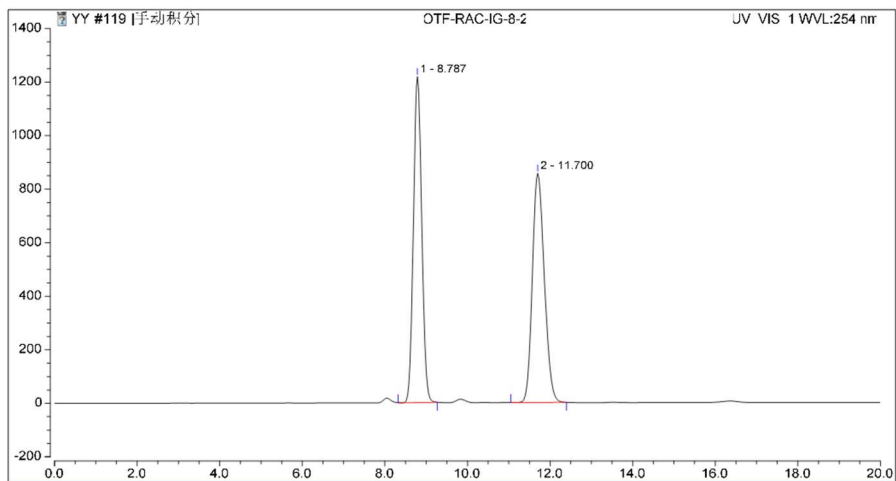

| Integration-Results |          |                   |              |            |                |                  |             |
|---------------------|----------|-------------------|--------------|------------|----------------|------------------|-------------|
| No.                 | PeakName | RetentionTime min | Area mAU*min | Height mAU | RelativeArea % | RelativeHeight % | Amount n.a. |
| 1                   |          | 8.787             | 281.871      | 1217.404   | 49.59          | 58.70            | n.a.        |
| 2                   |          | 11.700            | 286.509      | 856.701    | 50.41          | 41.30            | n.a.        |
| Total:              |          |                   | 568.380      | 2074.105   | 100.00         | 100.00           |             |

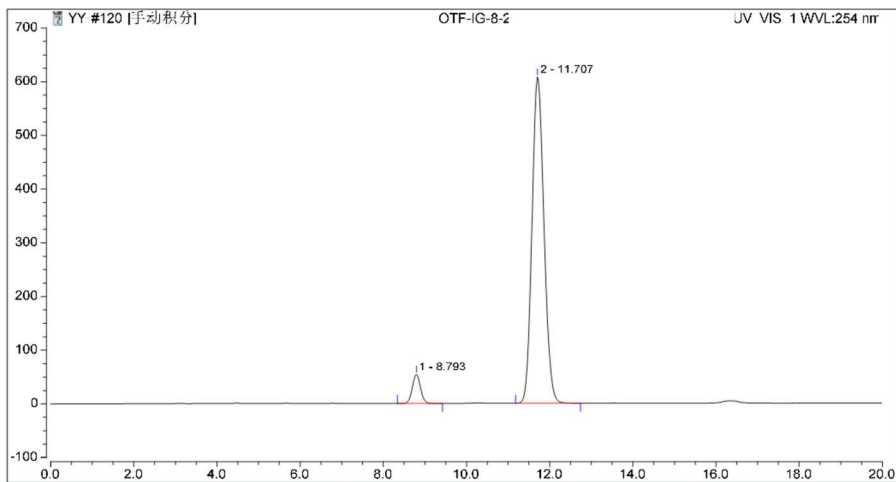

| Integration-Results |          |                   |              |            |                |                  |             |
|---------------------|----------|-------------------|--------------|------------|----------------|------------------|-------------|
| No.                 | PeakName | RetentionTime min | Area mAU*min | Height mAU | RelativeArea % | RelativeHeight % | Amount n.a. |
| 1                   |          | 8.793             | 12.355       | 54.181     | 5.76           | 8.18             | n.a.        |
| 2                   |          | 11.707            | 202.167      | 607.890    | 94.24          | 91.82            | n.a.        |
| Total:              |          |                   | 214.522      | 662.071    | 100.00         | 100.00           |             |

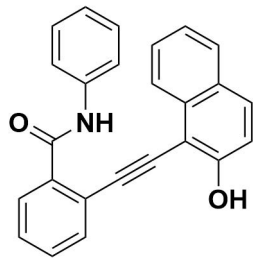

1a

$^1\text{H}$  NMR (400 MHz, DMSO- $d_6$ ) of 1a

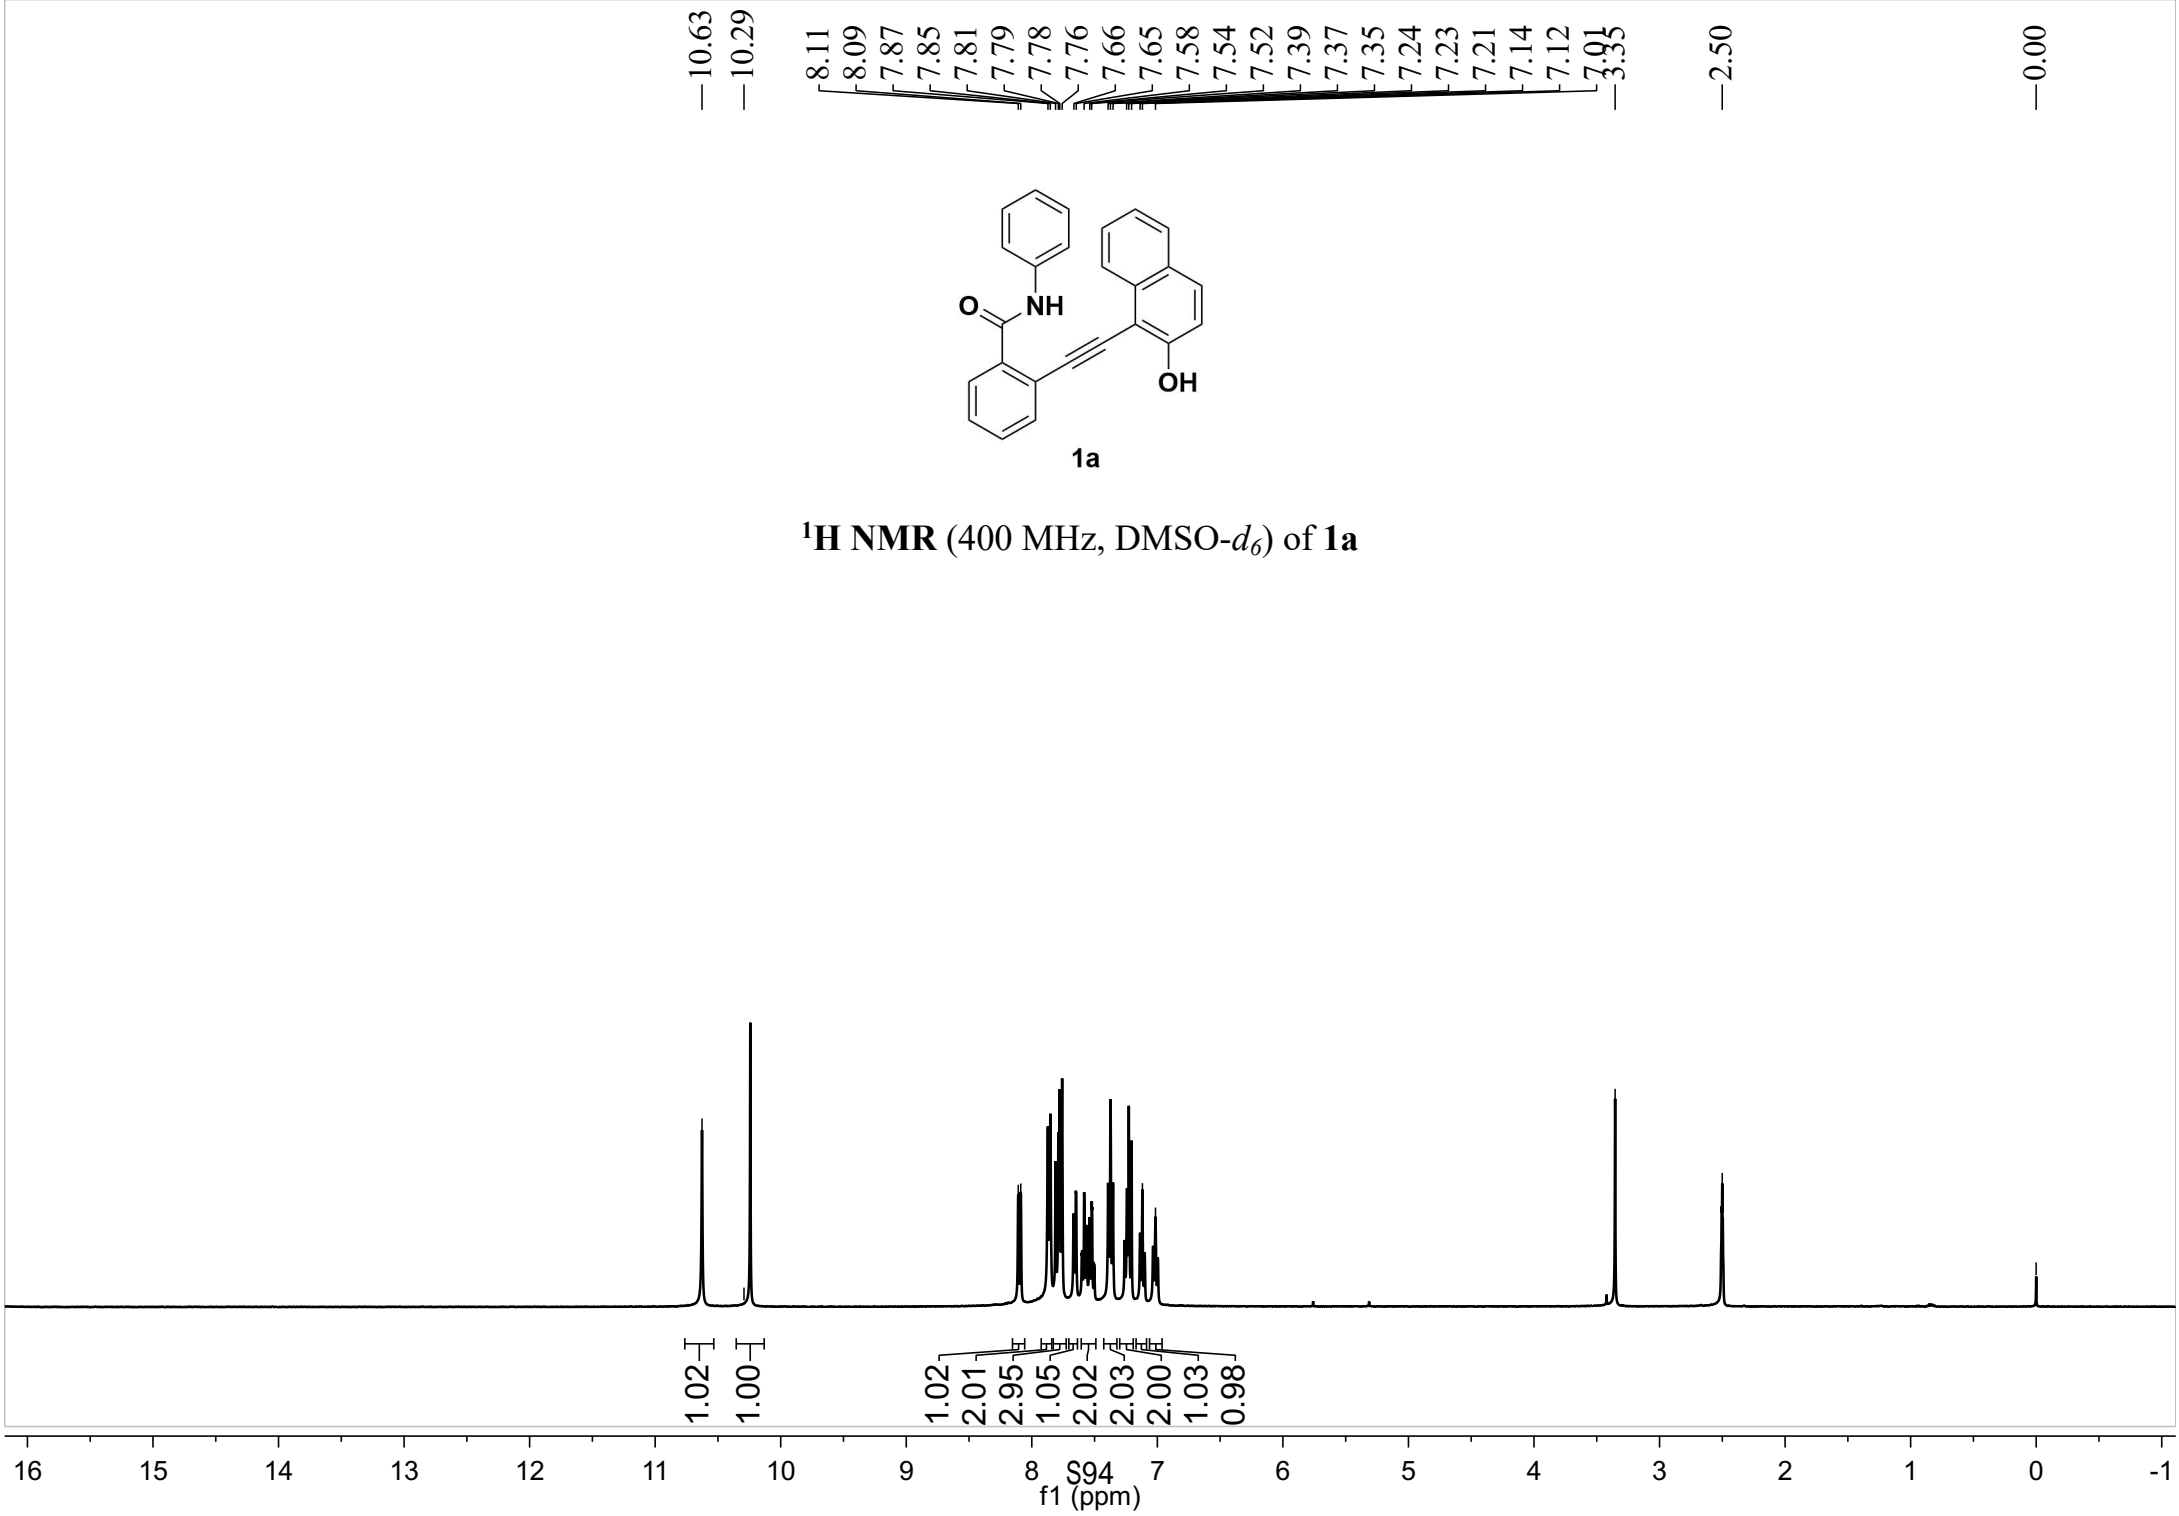

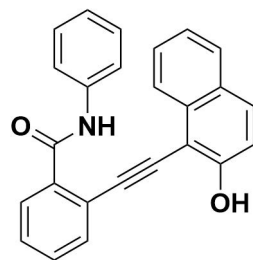

1a

<sup>13</sup>C NMR (100 MHz, DMSO-*d*<sub>6</sub>) of 1a

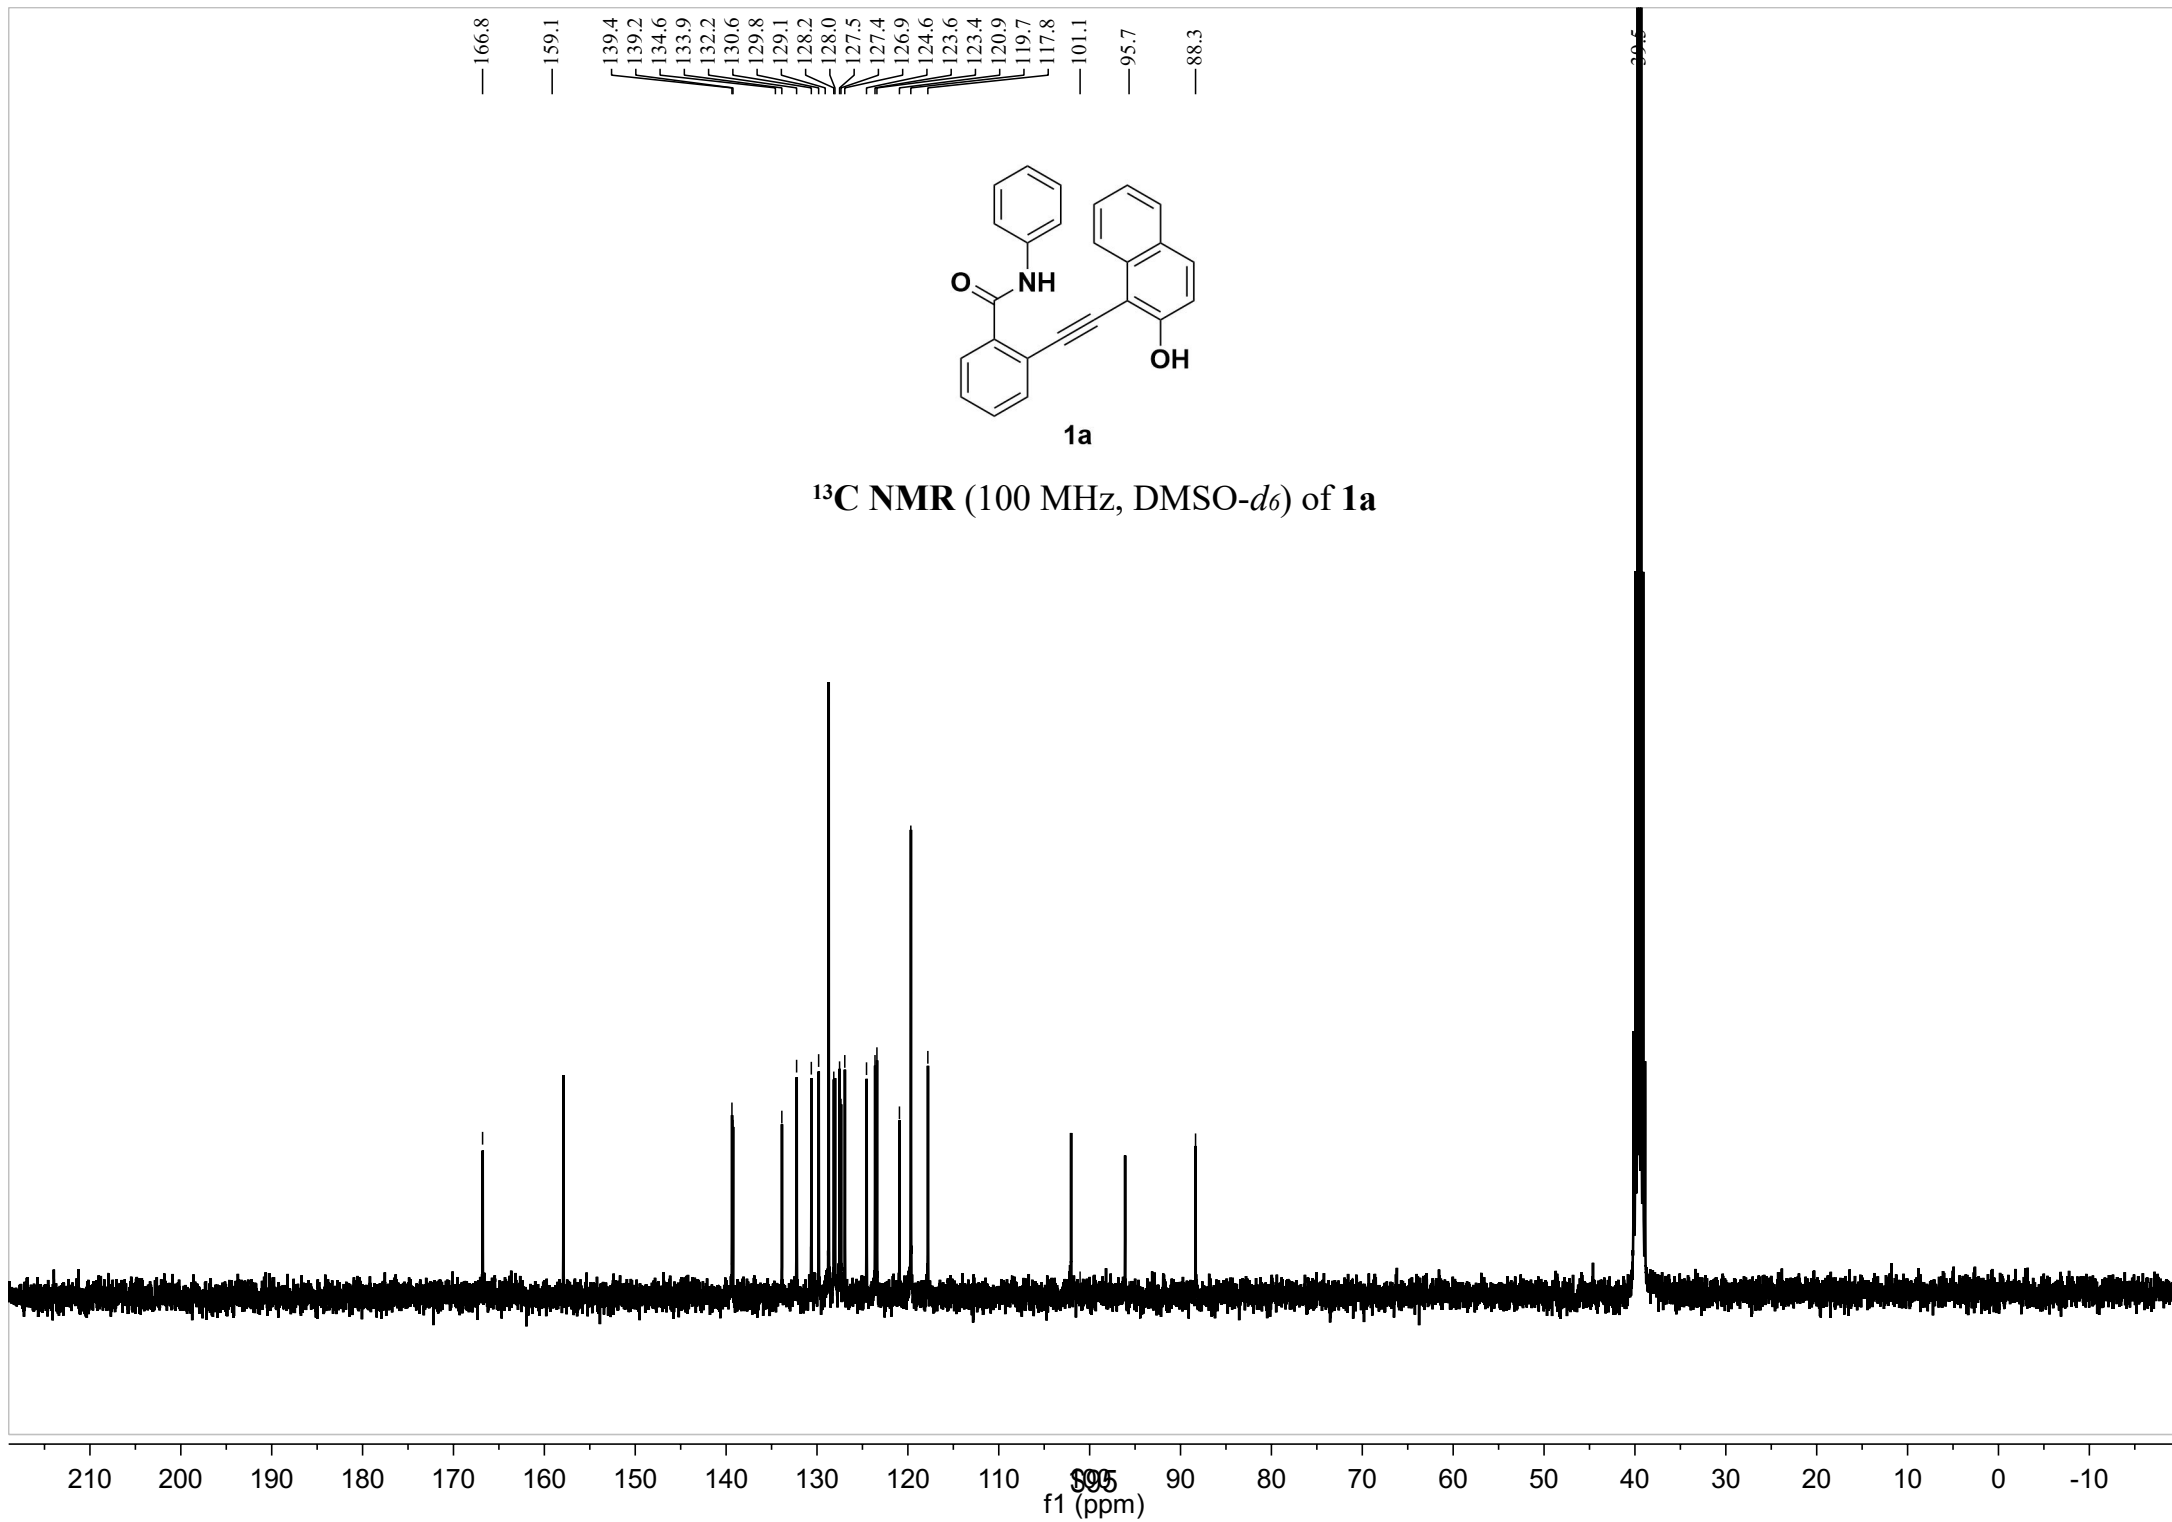

10.27  
10.19  
10.07  
10.06

8.20  
8.18  
7.84  
7.82  
7.81  
7.79  
7.76  
7.60  
7.58  
7.56  
7.54  
7.34  
7.32  
7.30  
7.28  
7.26  
7.25  
7.22  
7.17  
7.15  
3.36

2.50  
2.24

0.00

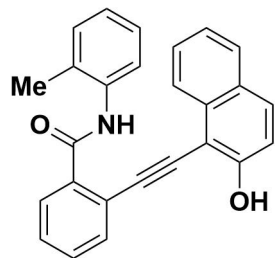

1b

<sup>1</sup>H NMR (400 MHz, DMSO-d<sub>6</sub>) of 1b

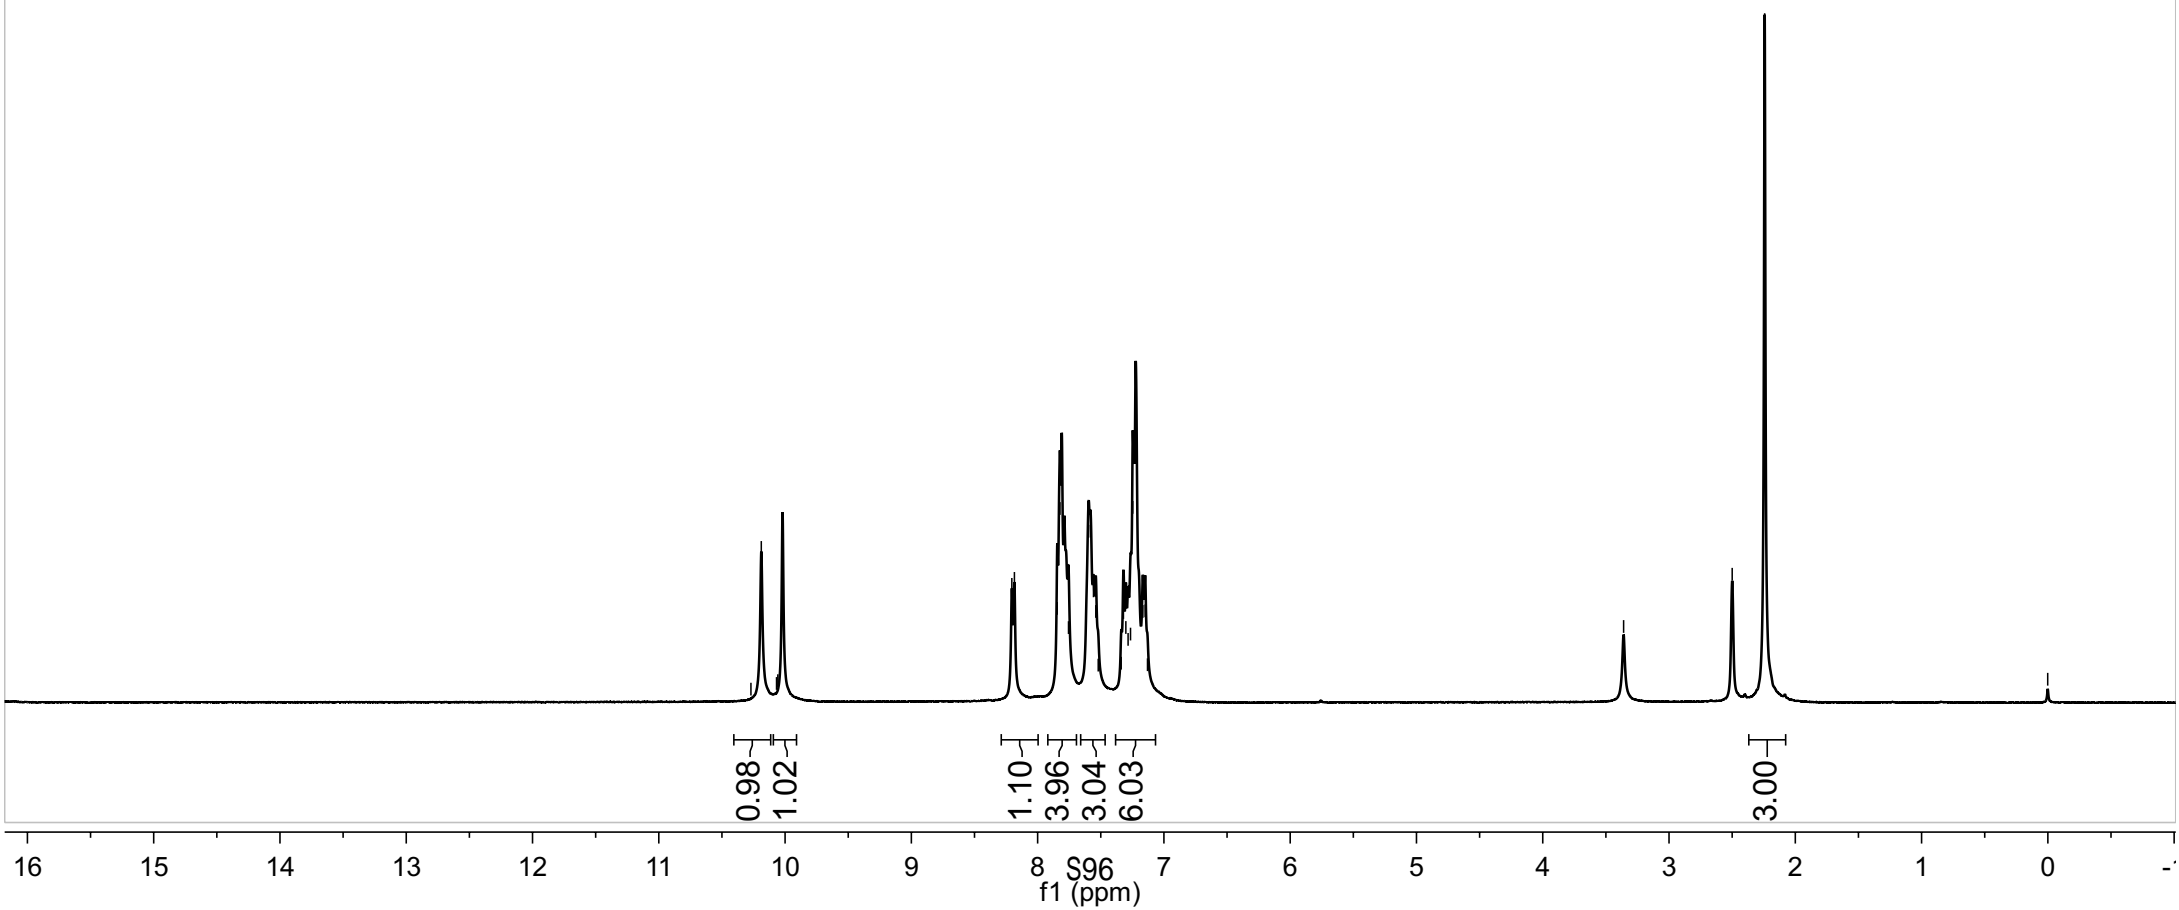



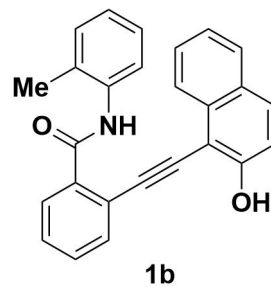

$^{13}\text{C}$  NMR (125 MHz,  $\text{DMSO-}d_6$ ) of **1b**

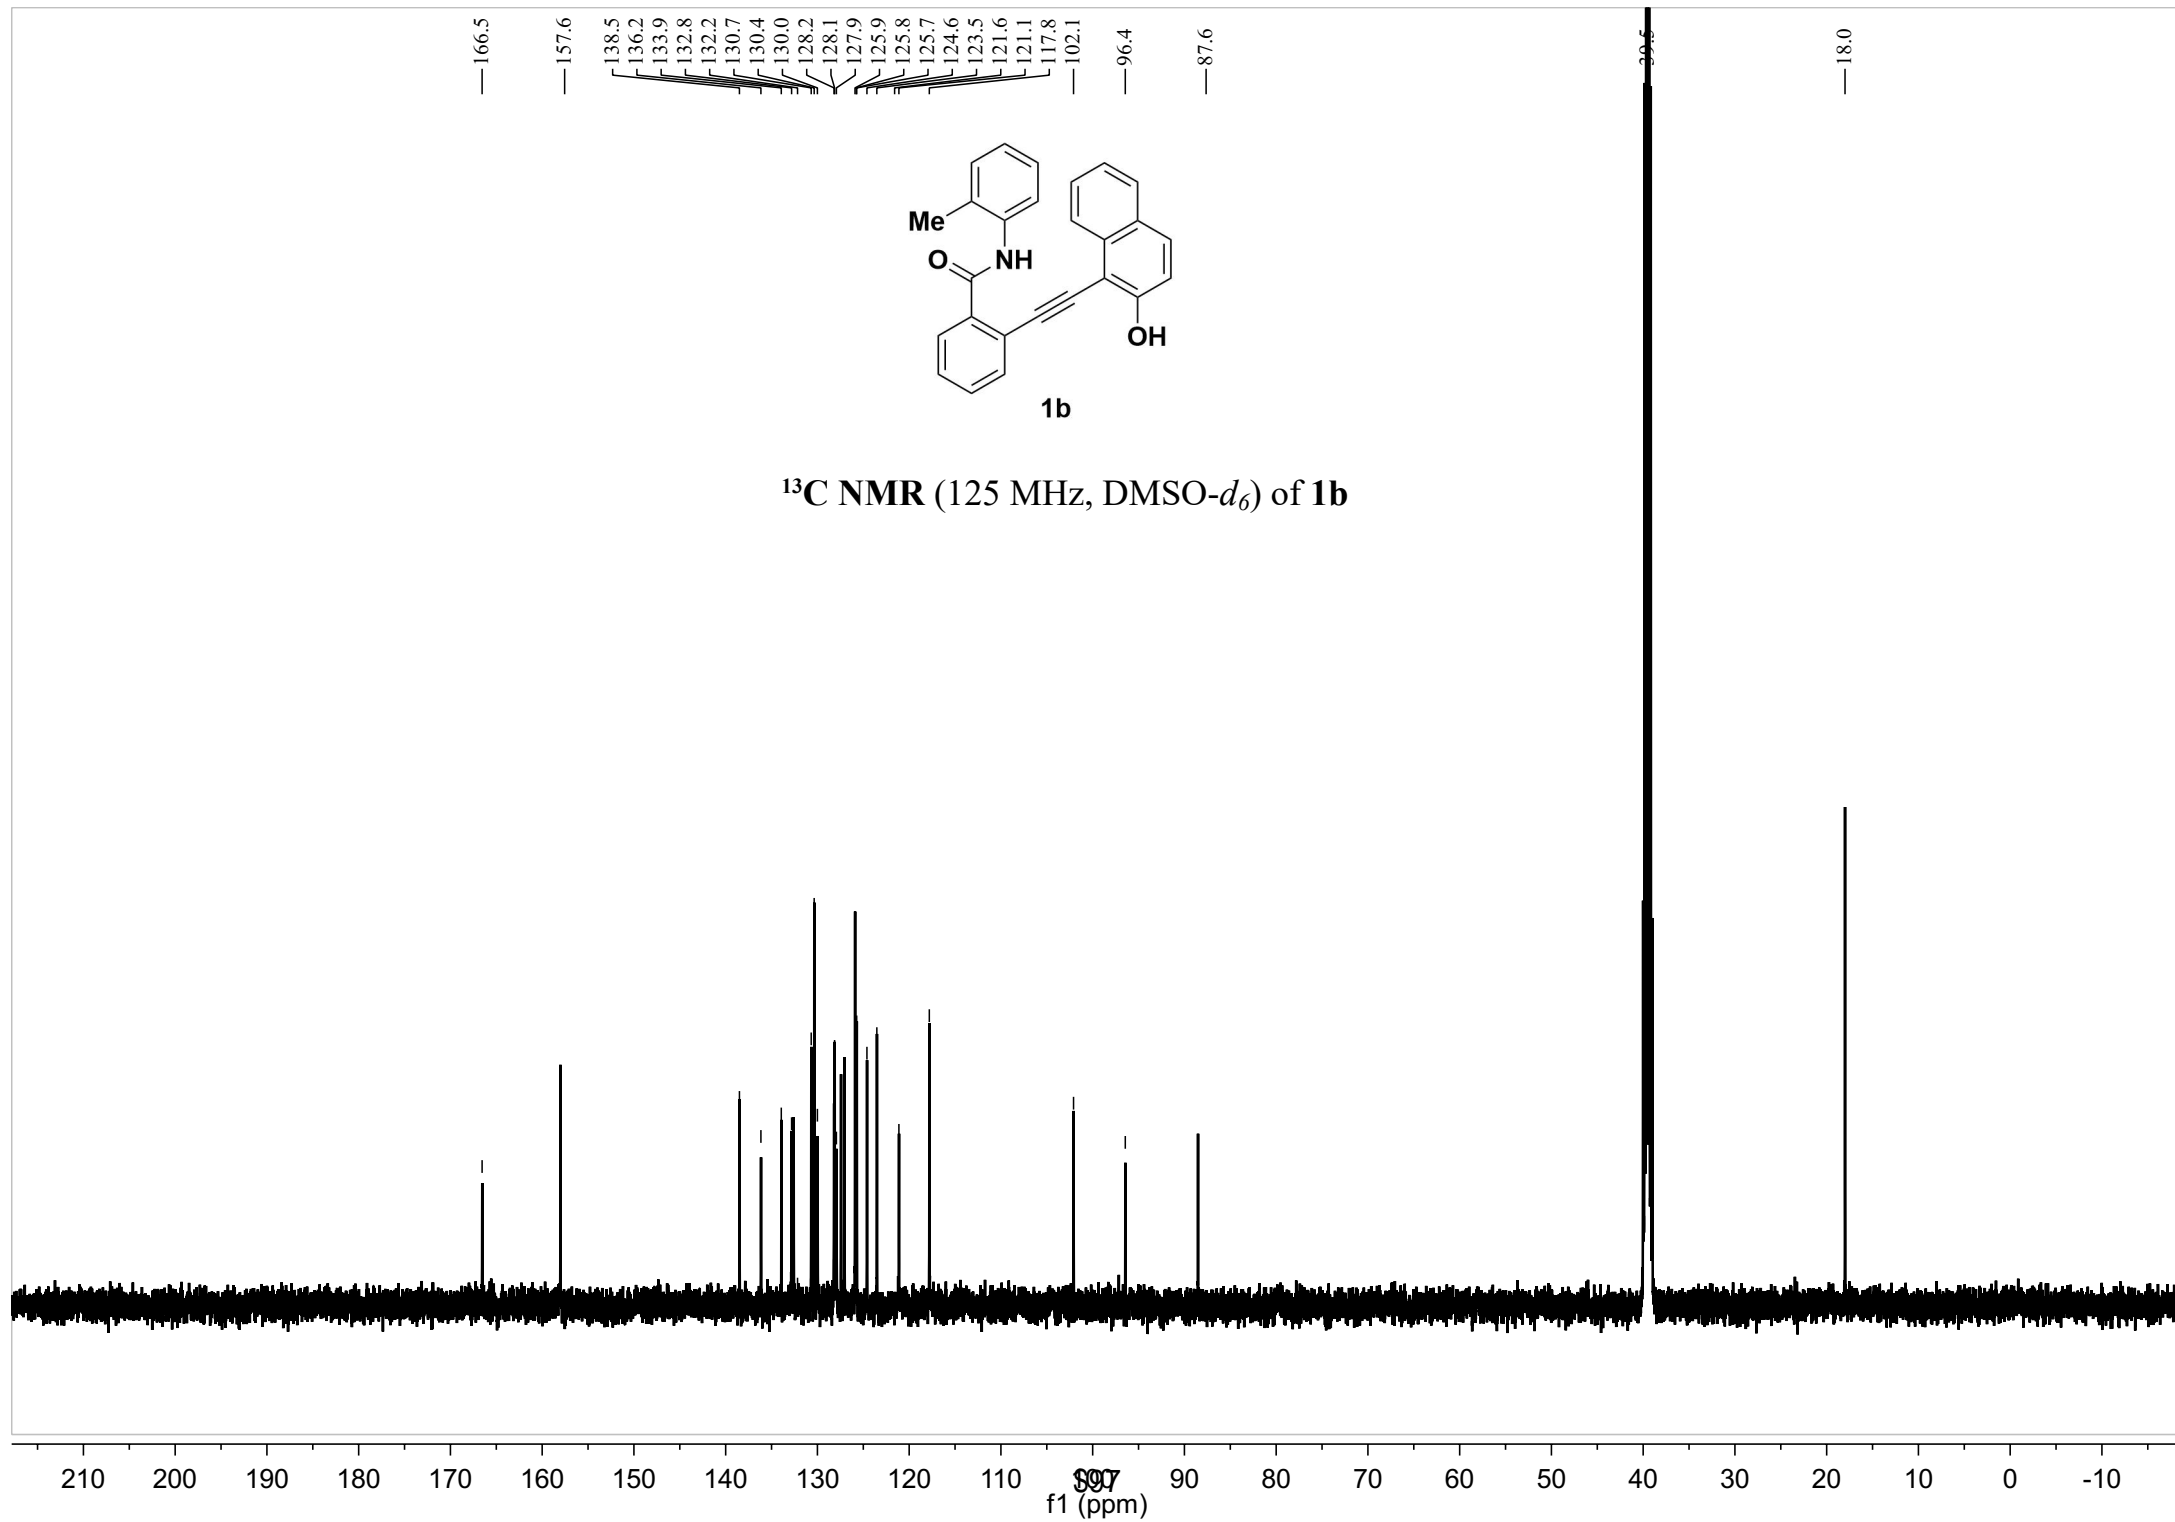

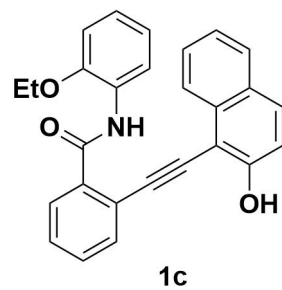

**<sup>1</sup>H NMR (400 MHz, Acetone-*d*<sub>6</sub>) of 1c**

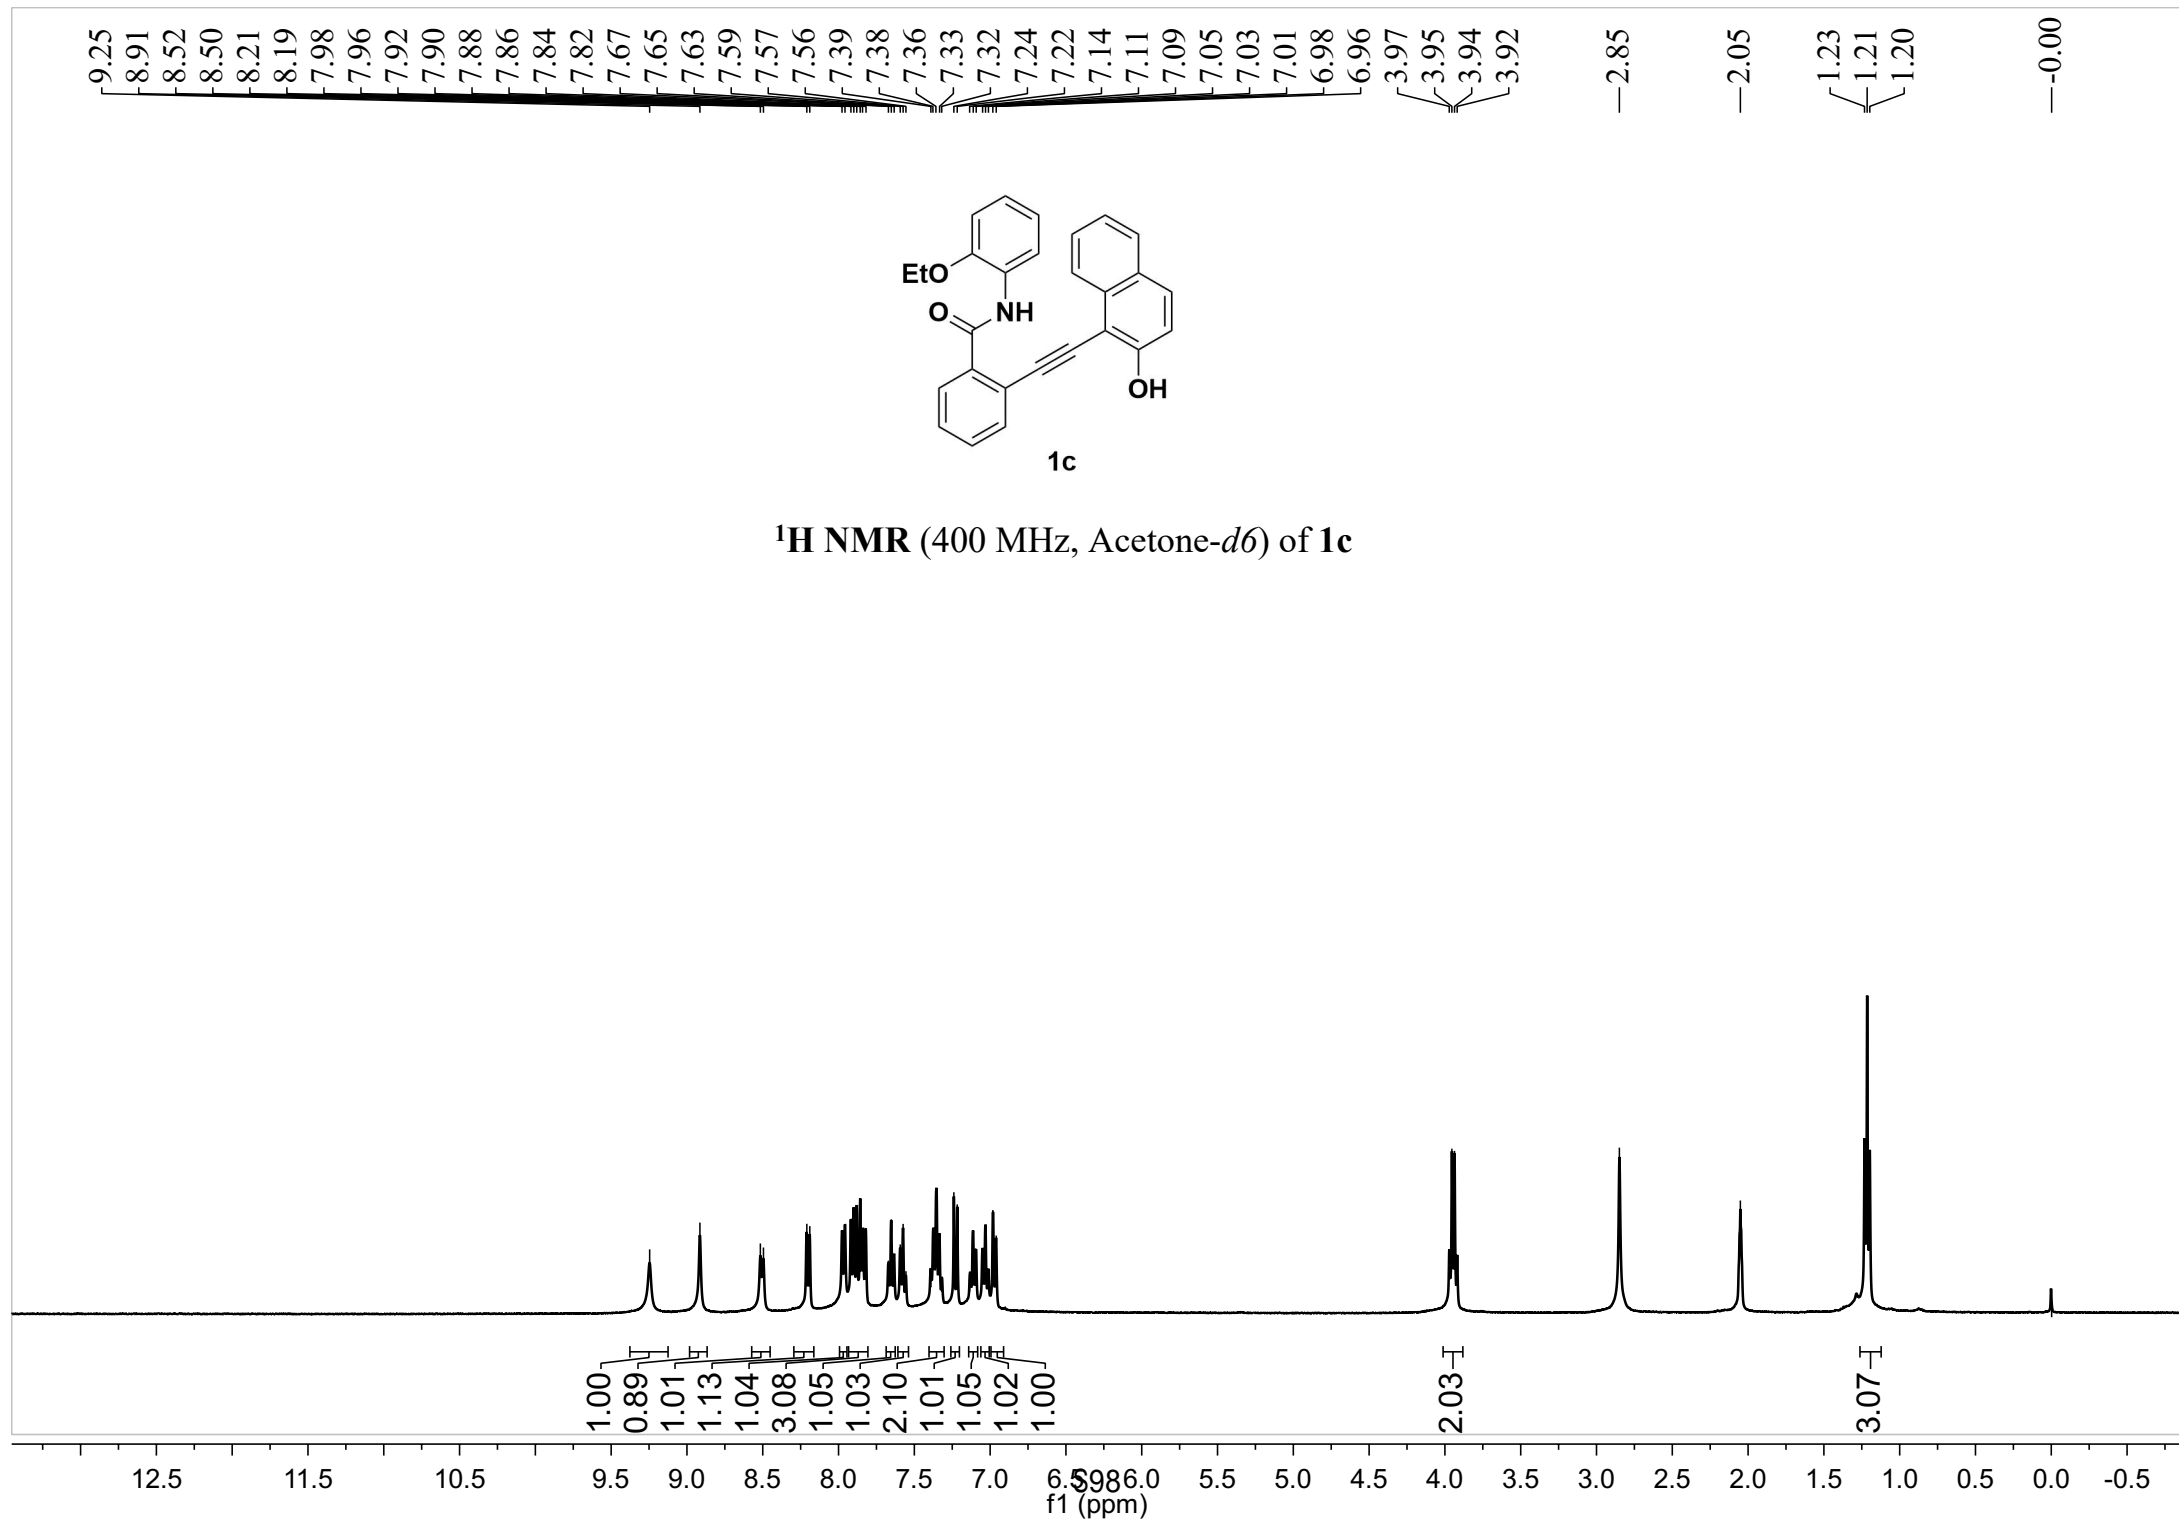

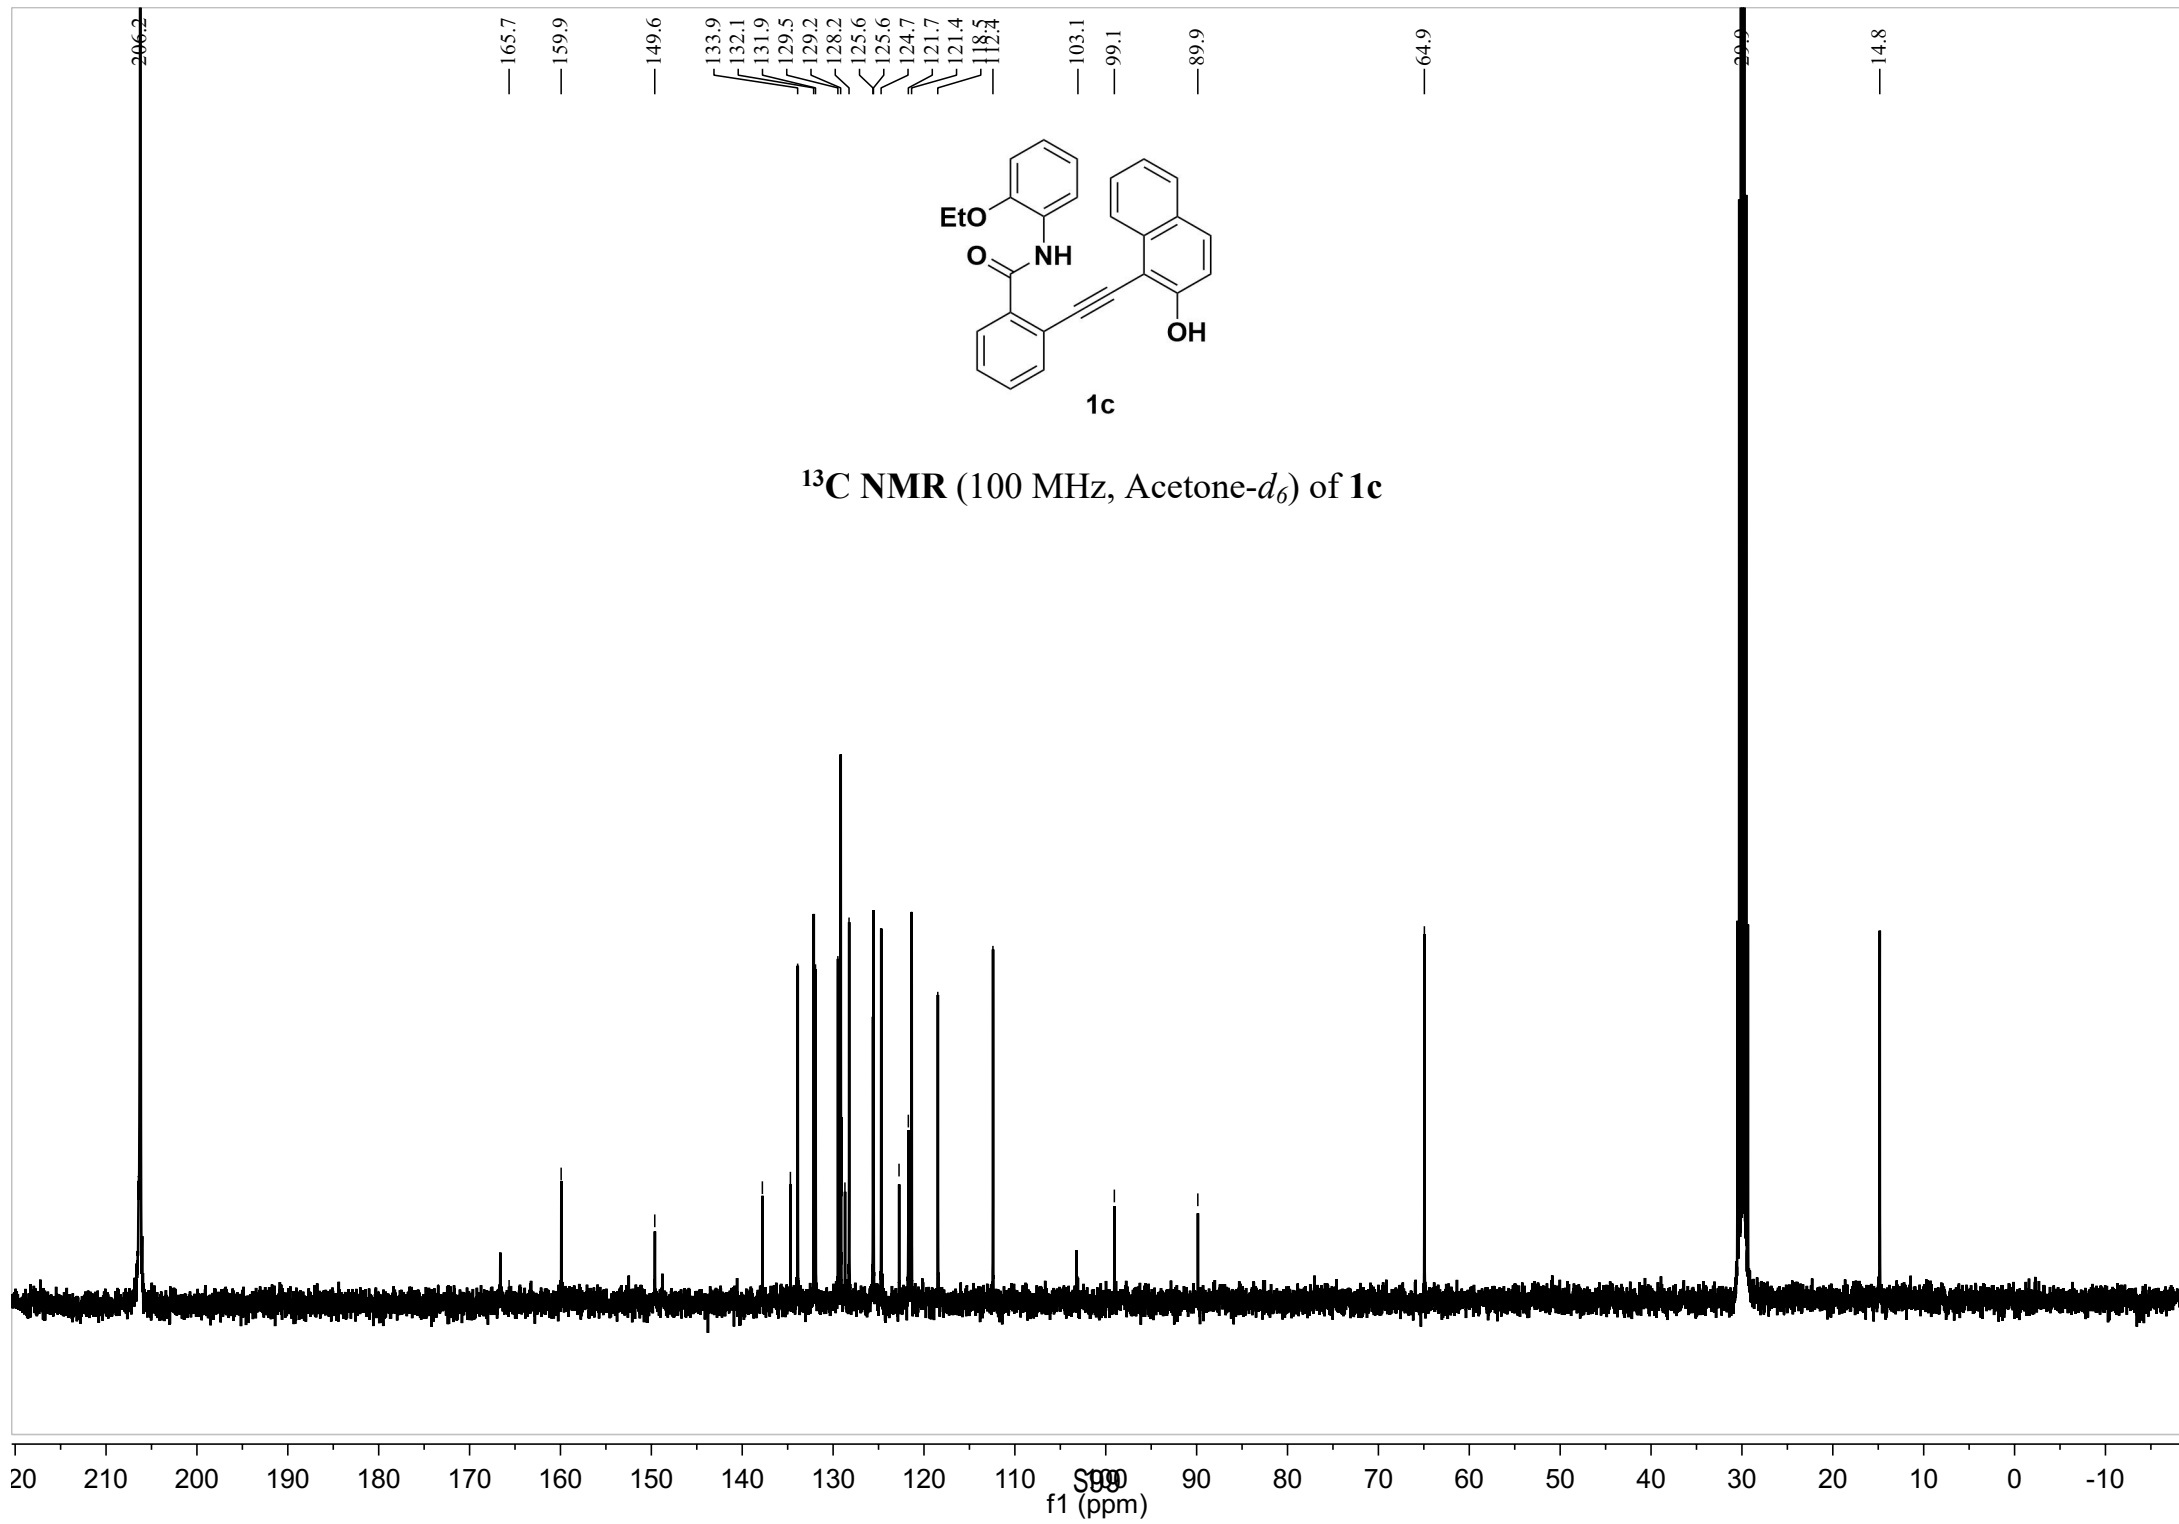



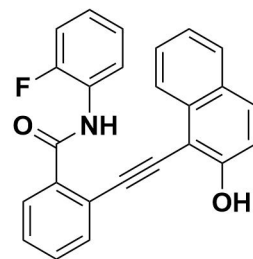

1d

<sup>19</sup>F NMR (376 MHz, Acetone-*d*<sub>6</sub>) of 1d

--126.33

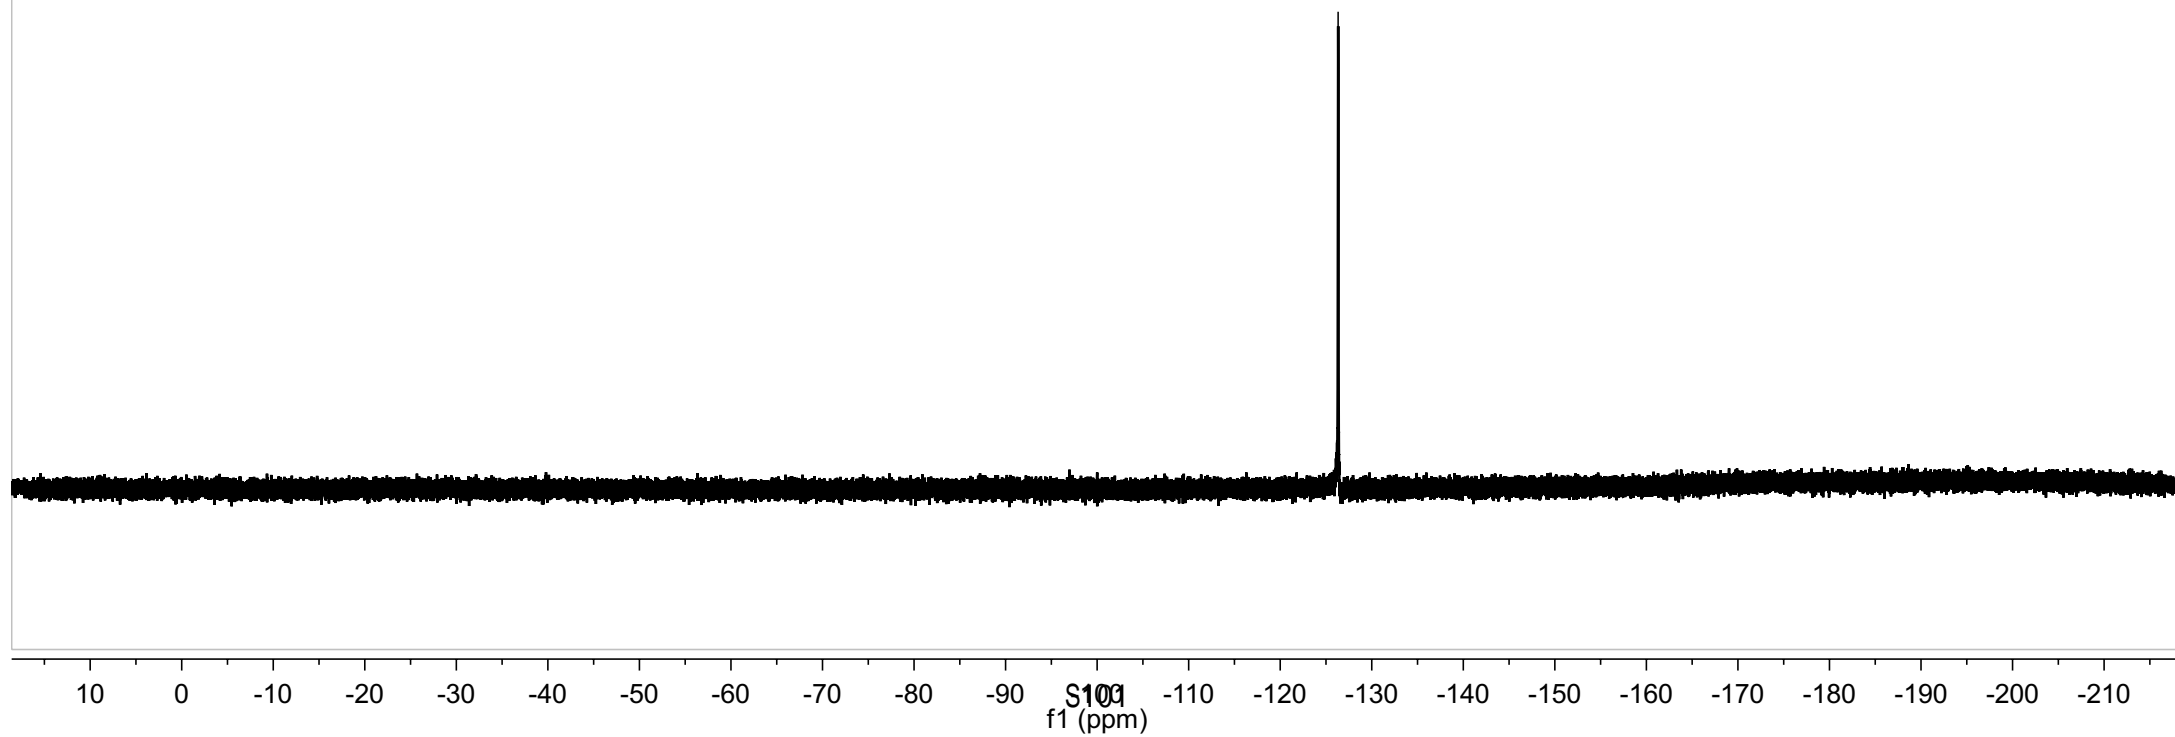

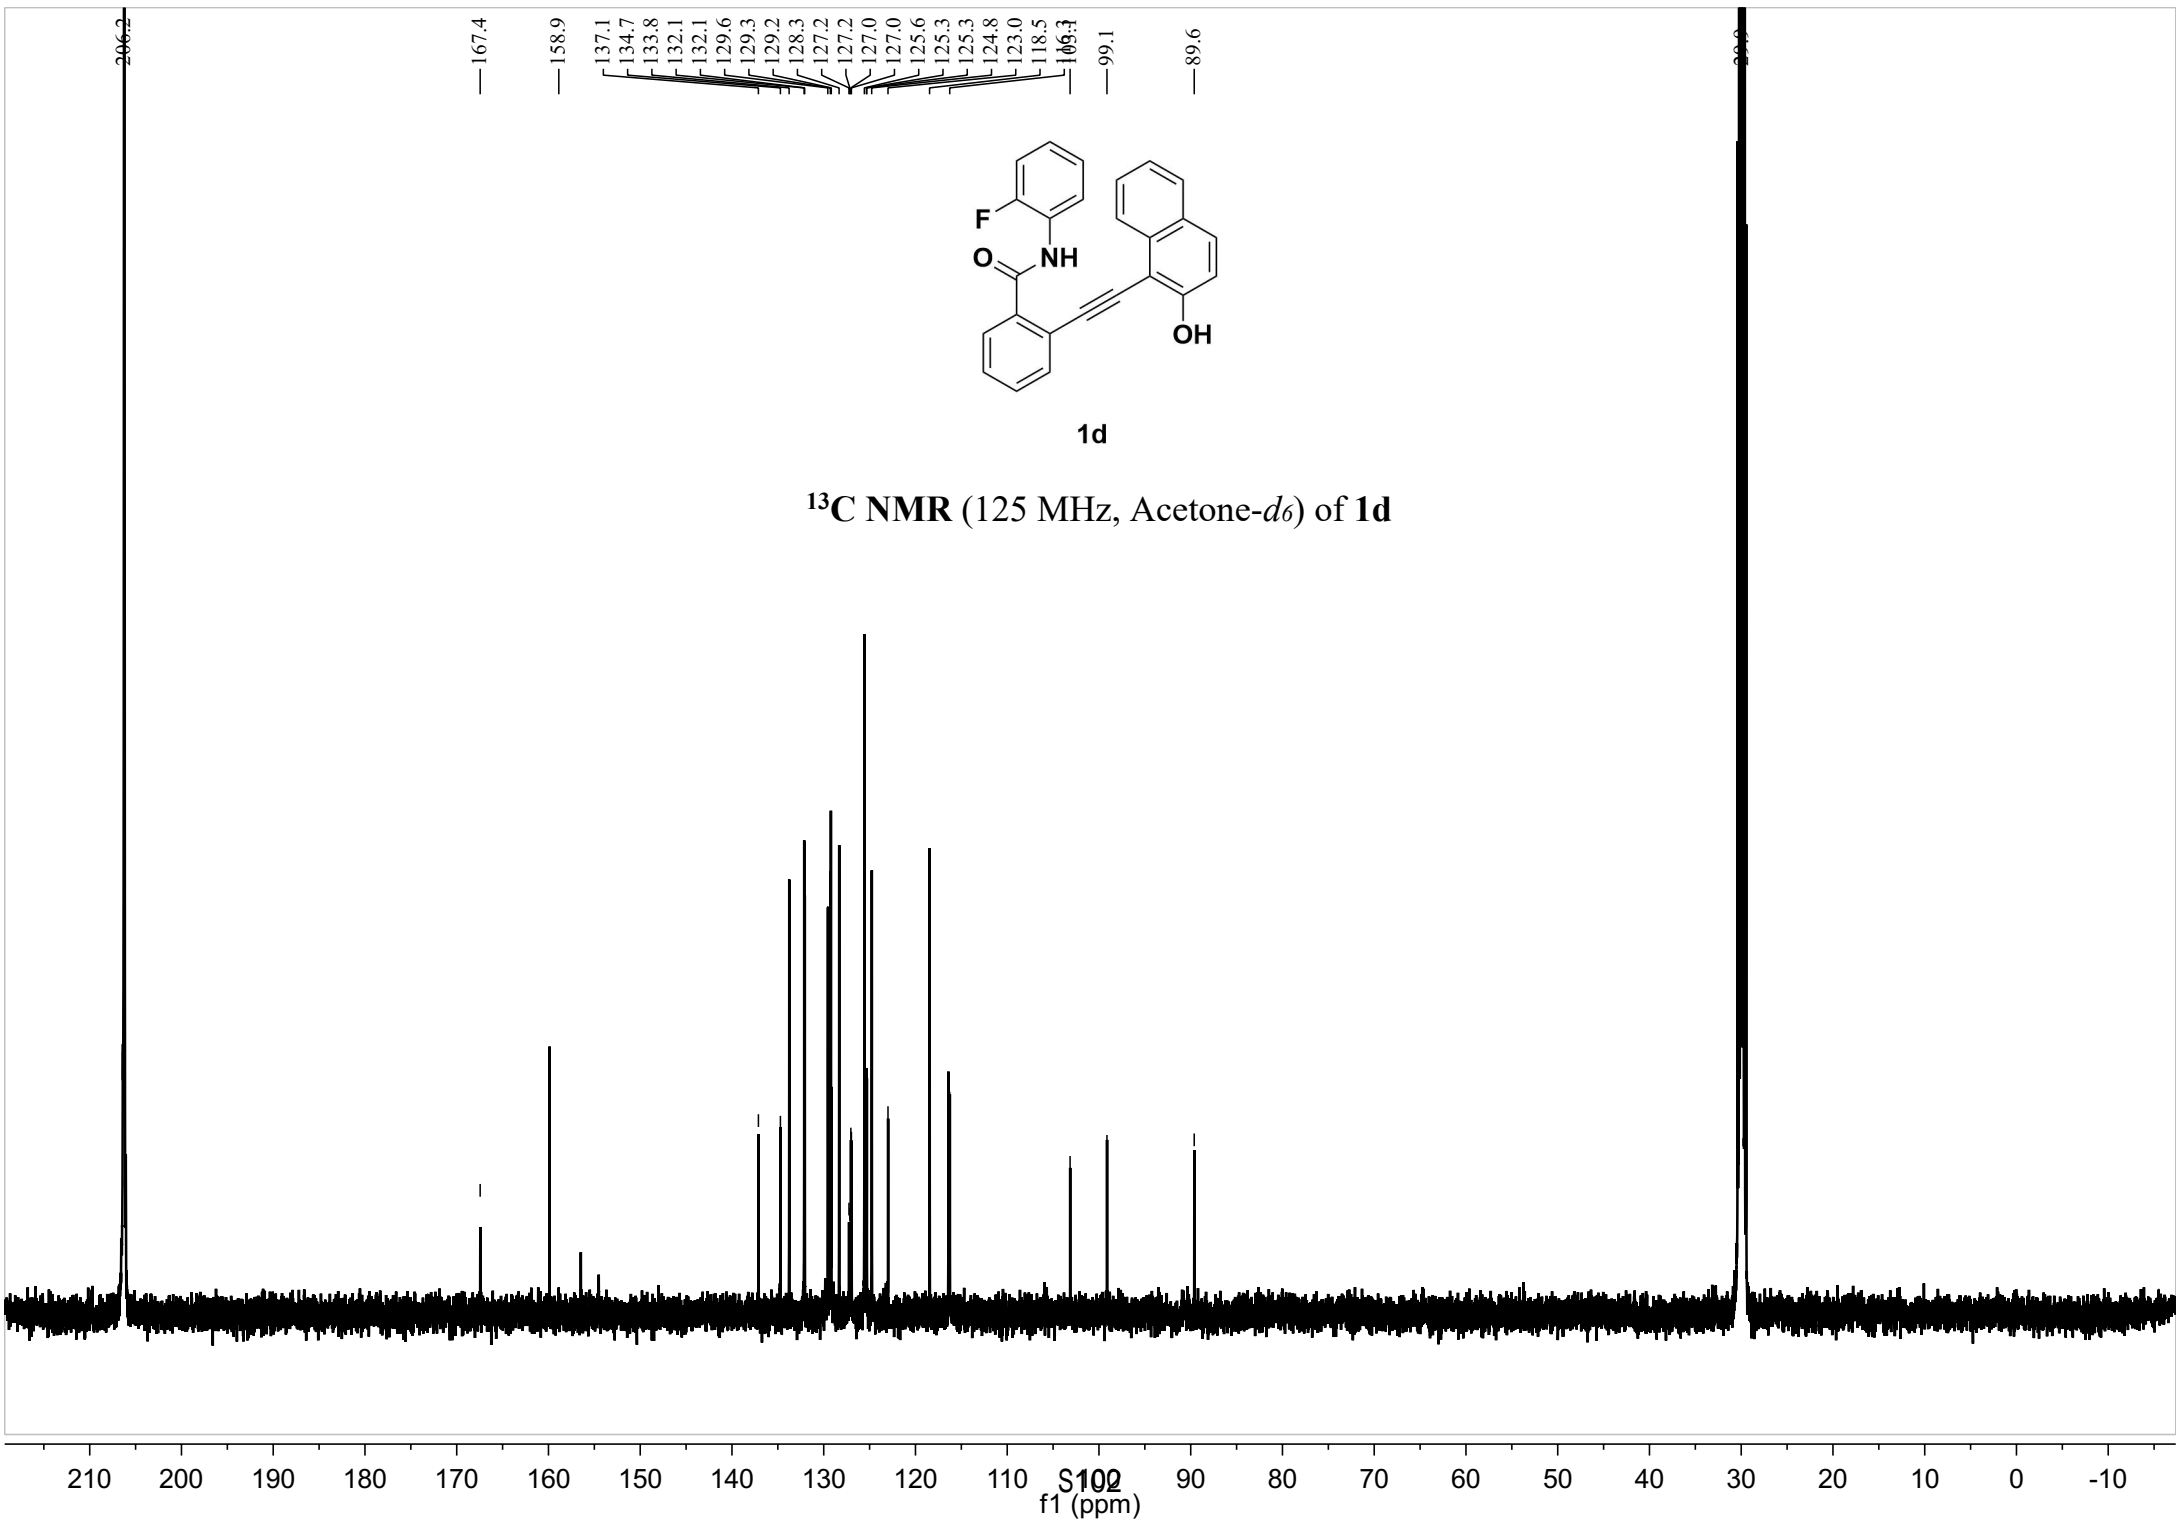

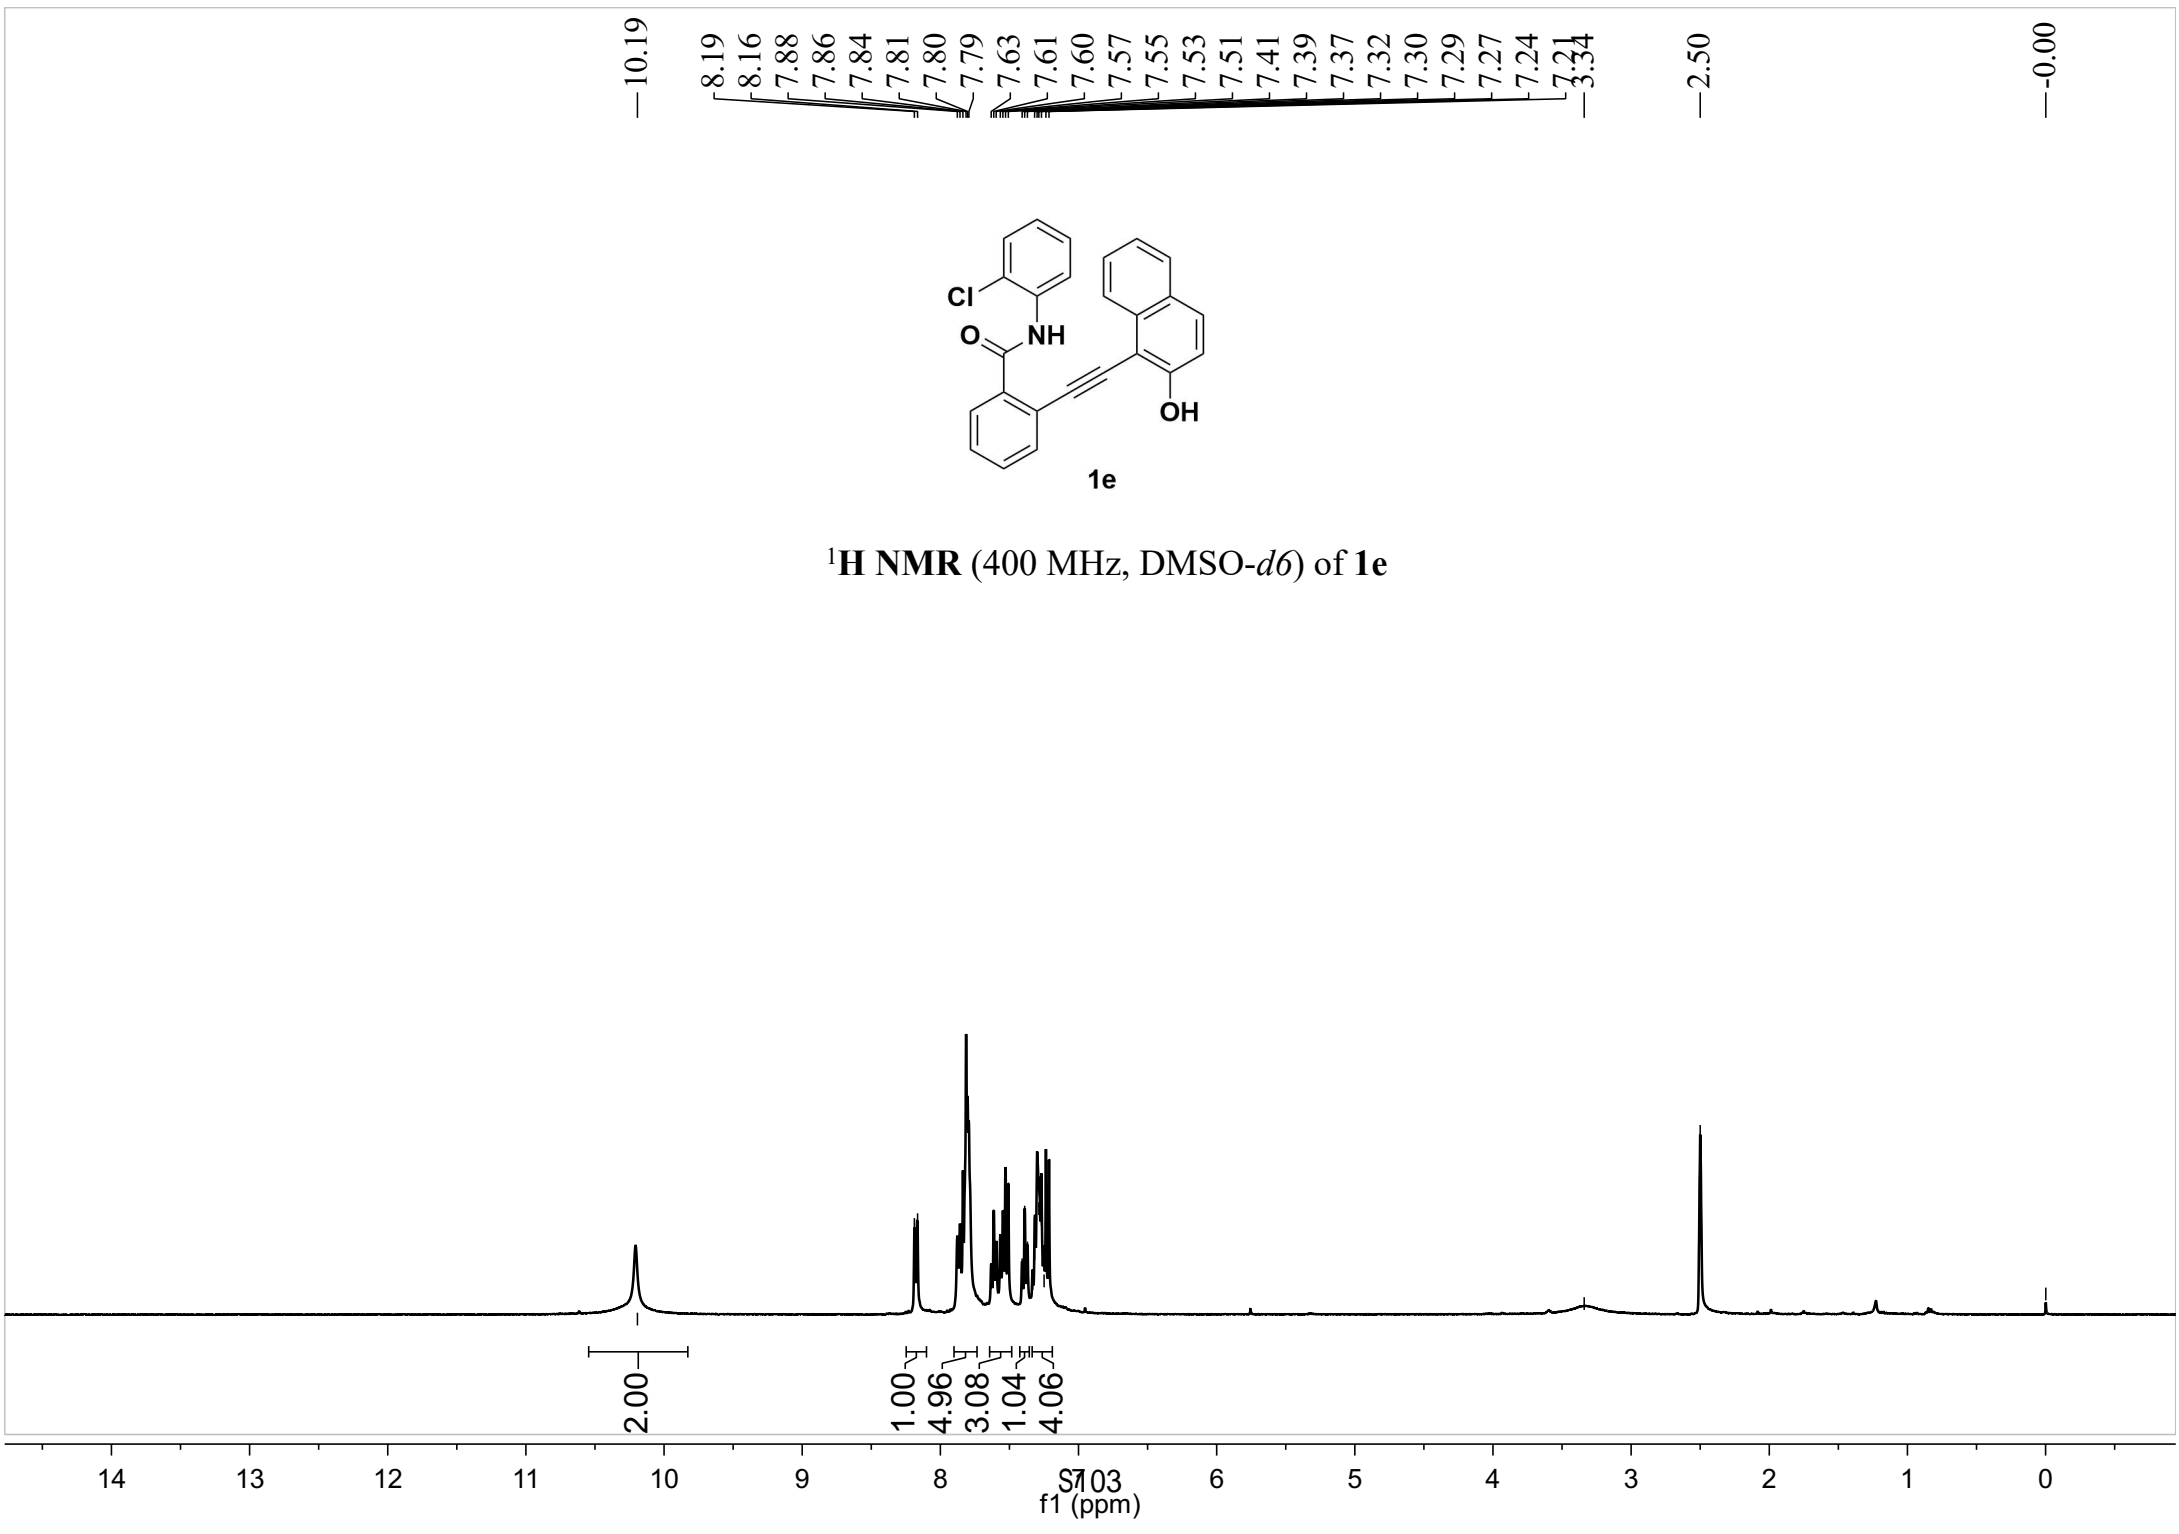

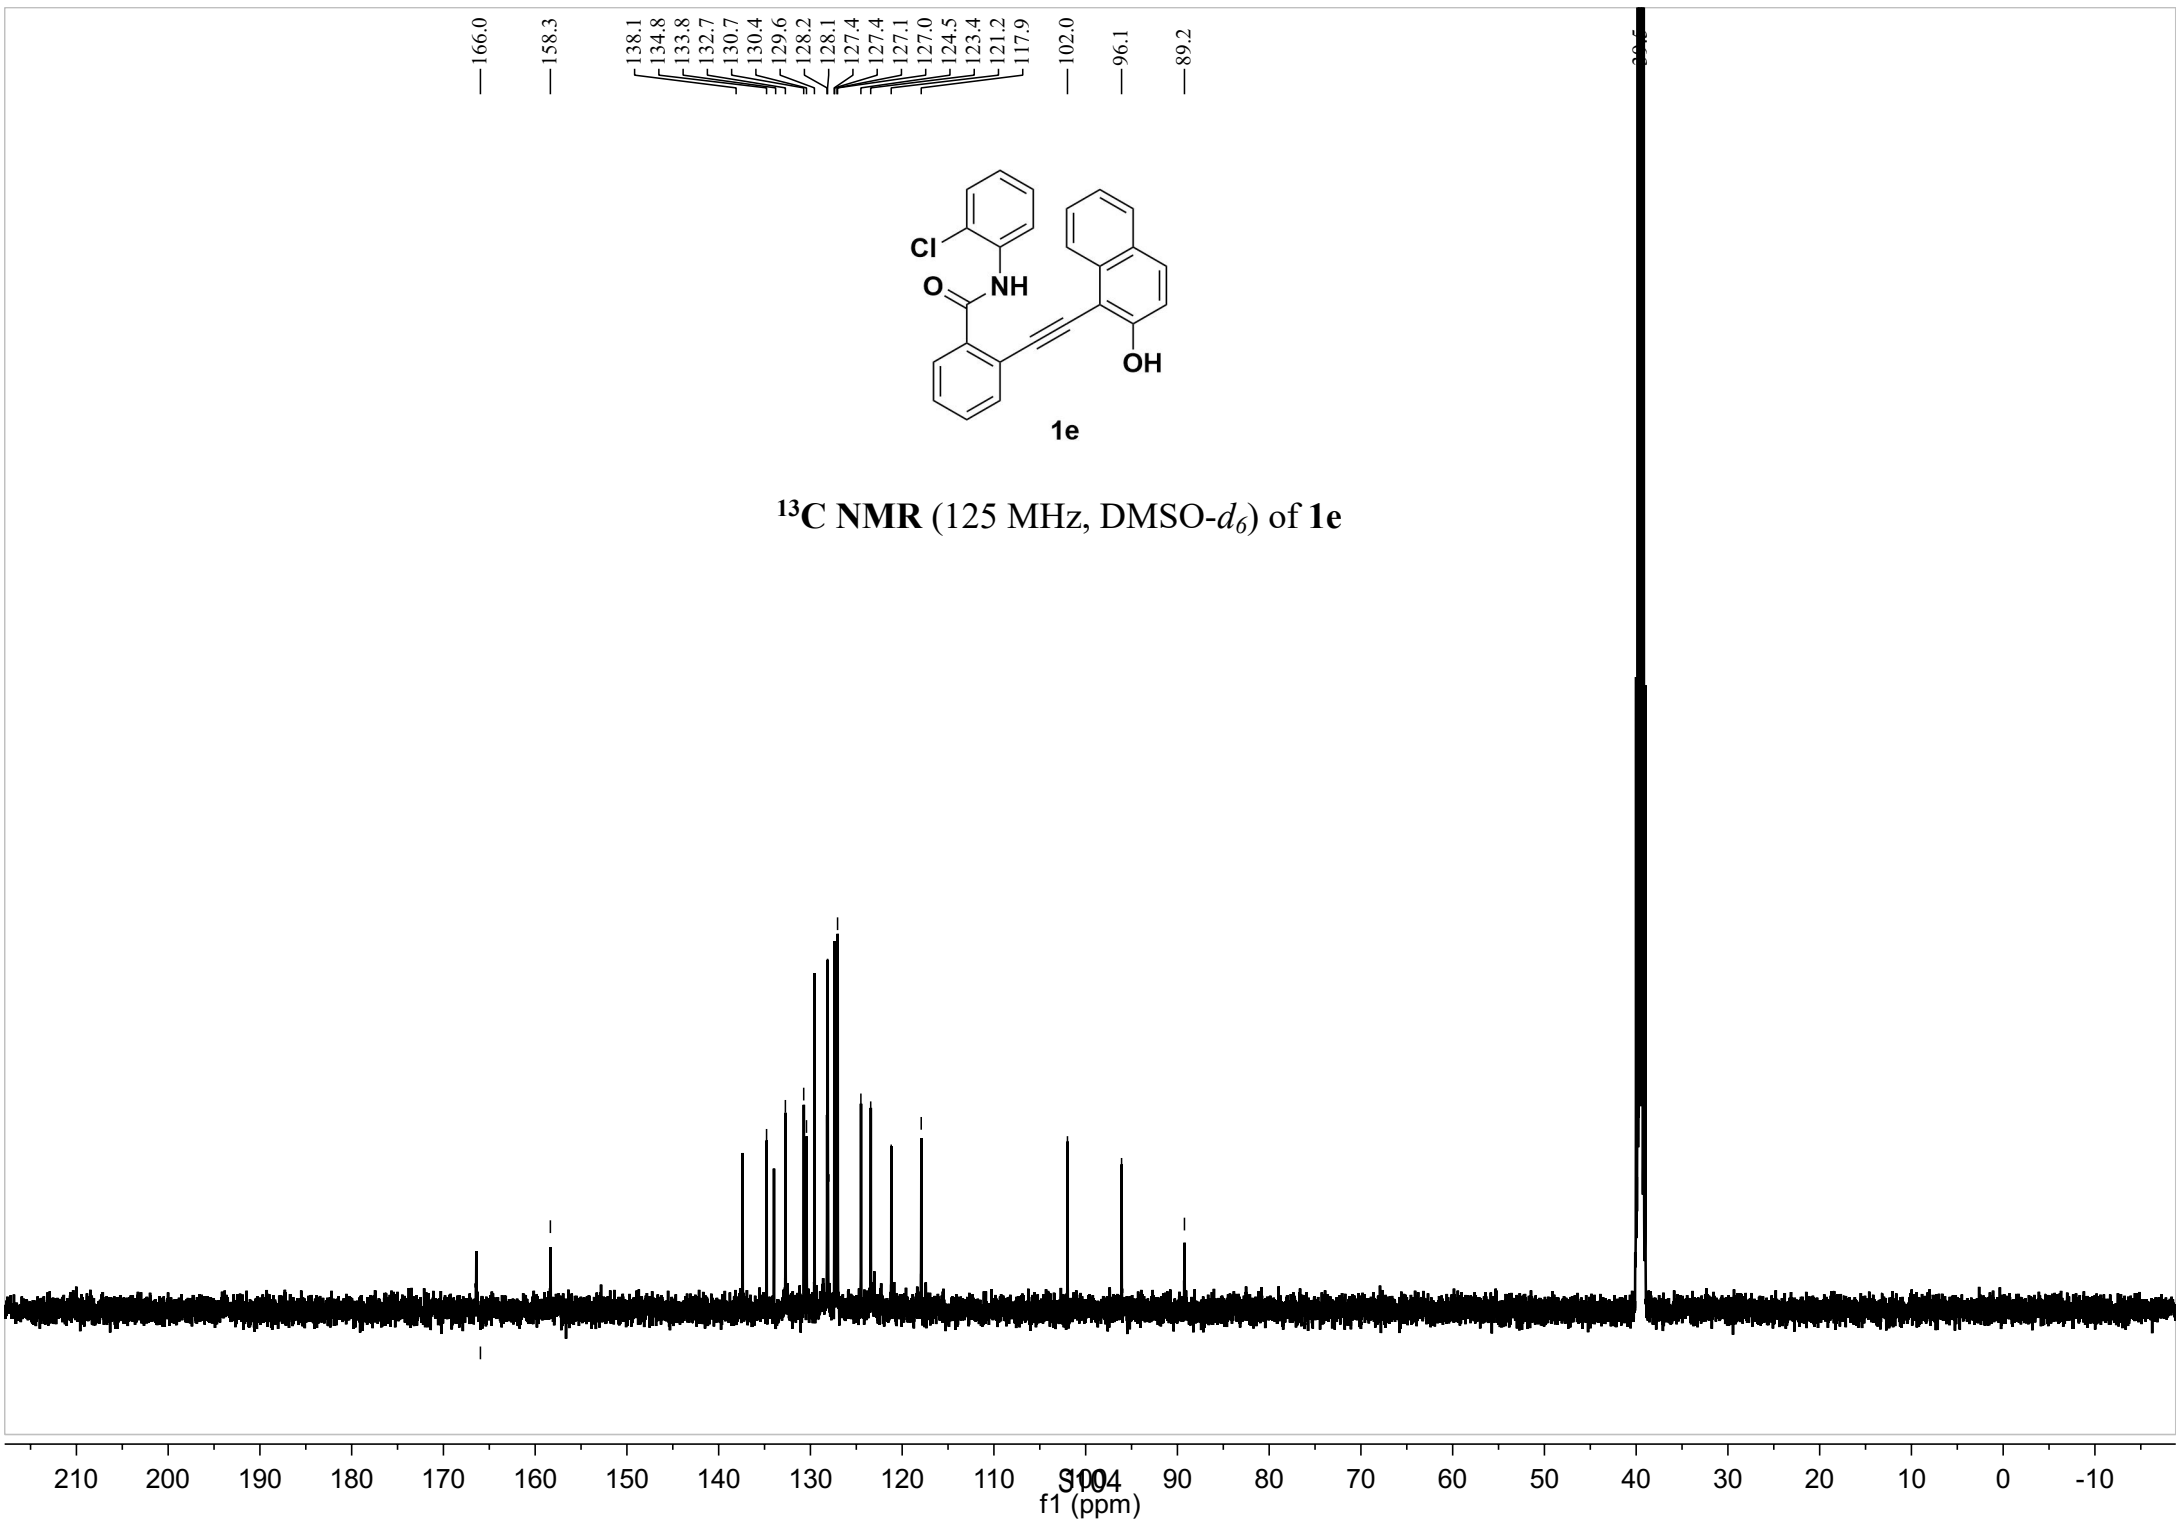



10.53  
10.24  
8.15  
8.13  
7.82  
7.79  
7.78  
7.77  
7.71  
7.66  
7.64  
7.62  
7.58  
7.56  
7.54  
7.52  
7.50  
7.28  
7.26  
7.24  
7.22  
7.21  
7.09  
7.07  
7.05  
6.94  
5.92  
5.37

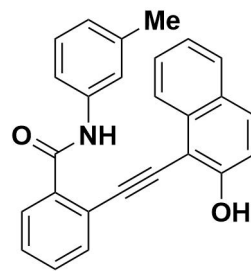

1f

<sup>1</sup>H NMR (400 MHz, DMSO-*d*<sub>6</sub>) of 1f

2.50  
2.29

0.00

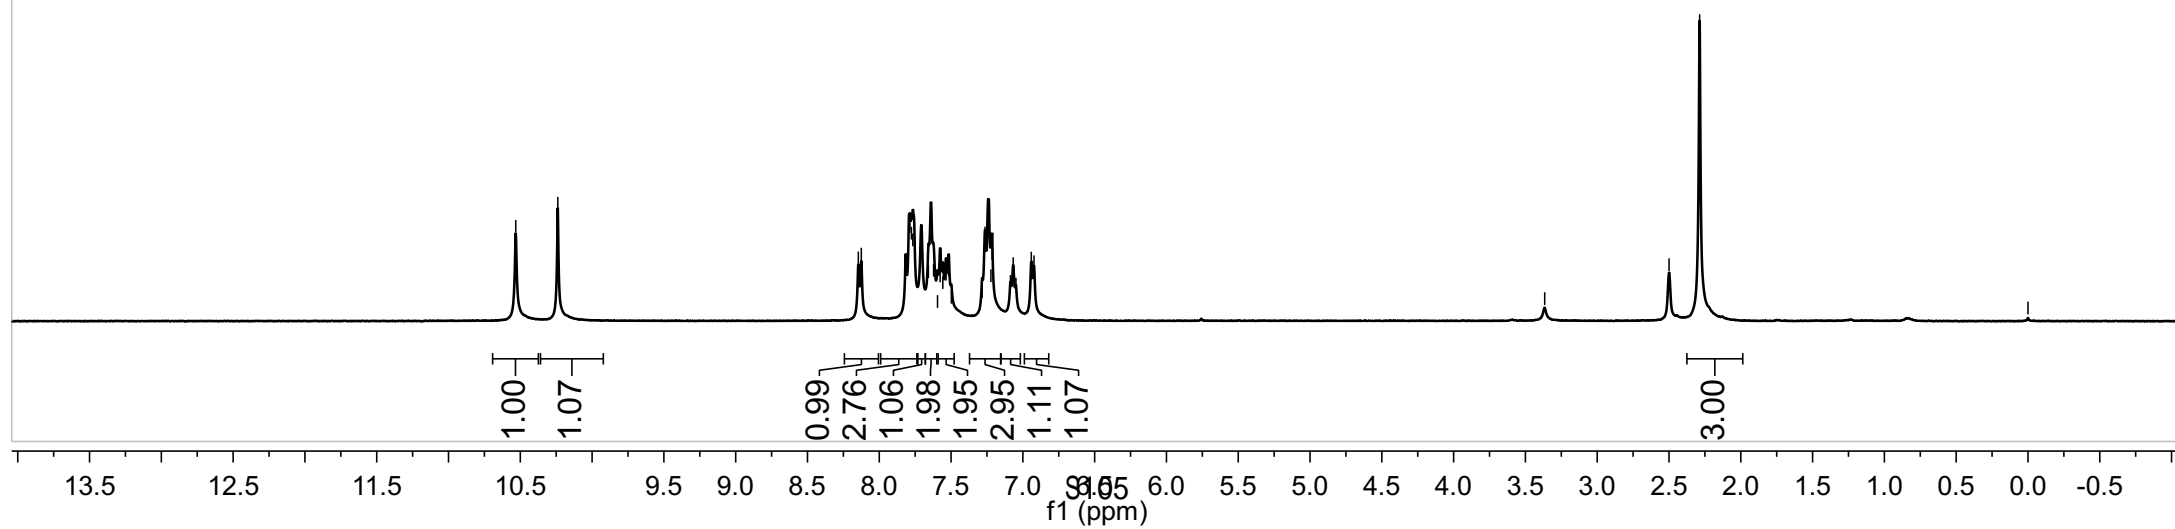

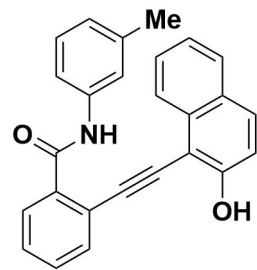

**1f**

$^{13}\text{C}$  NMR (100 MHz, DMSO- $d_6$ ) of **1f**

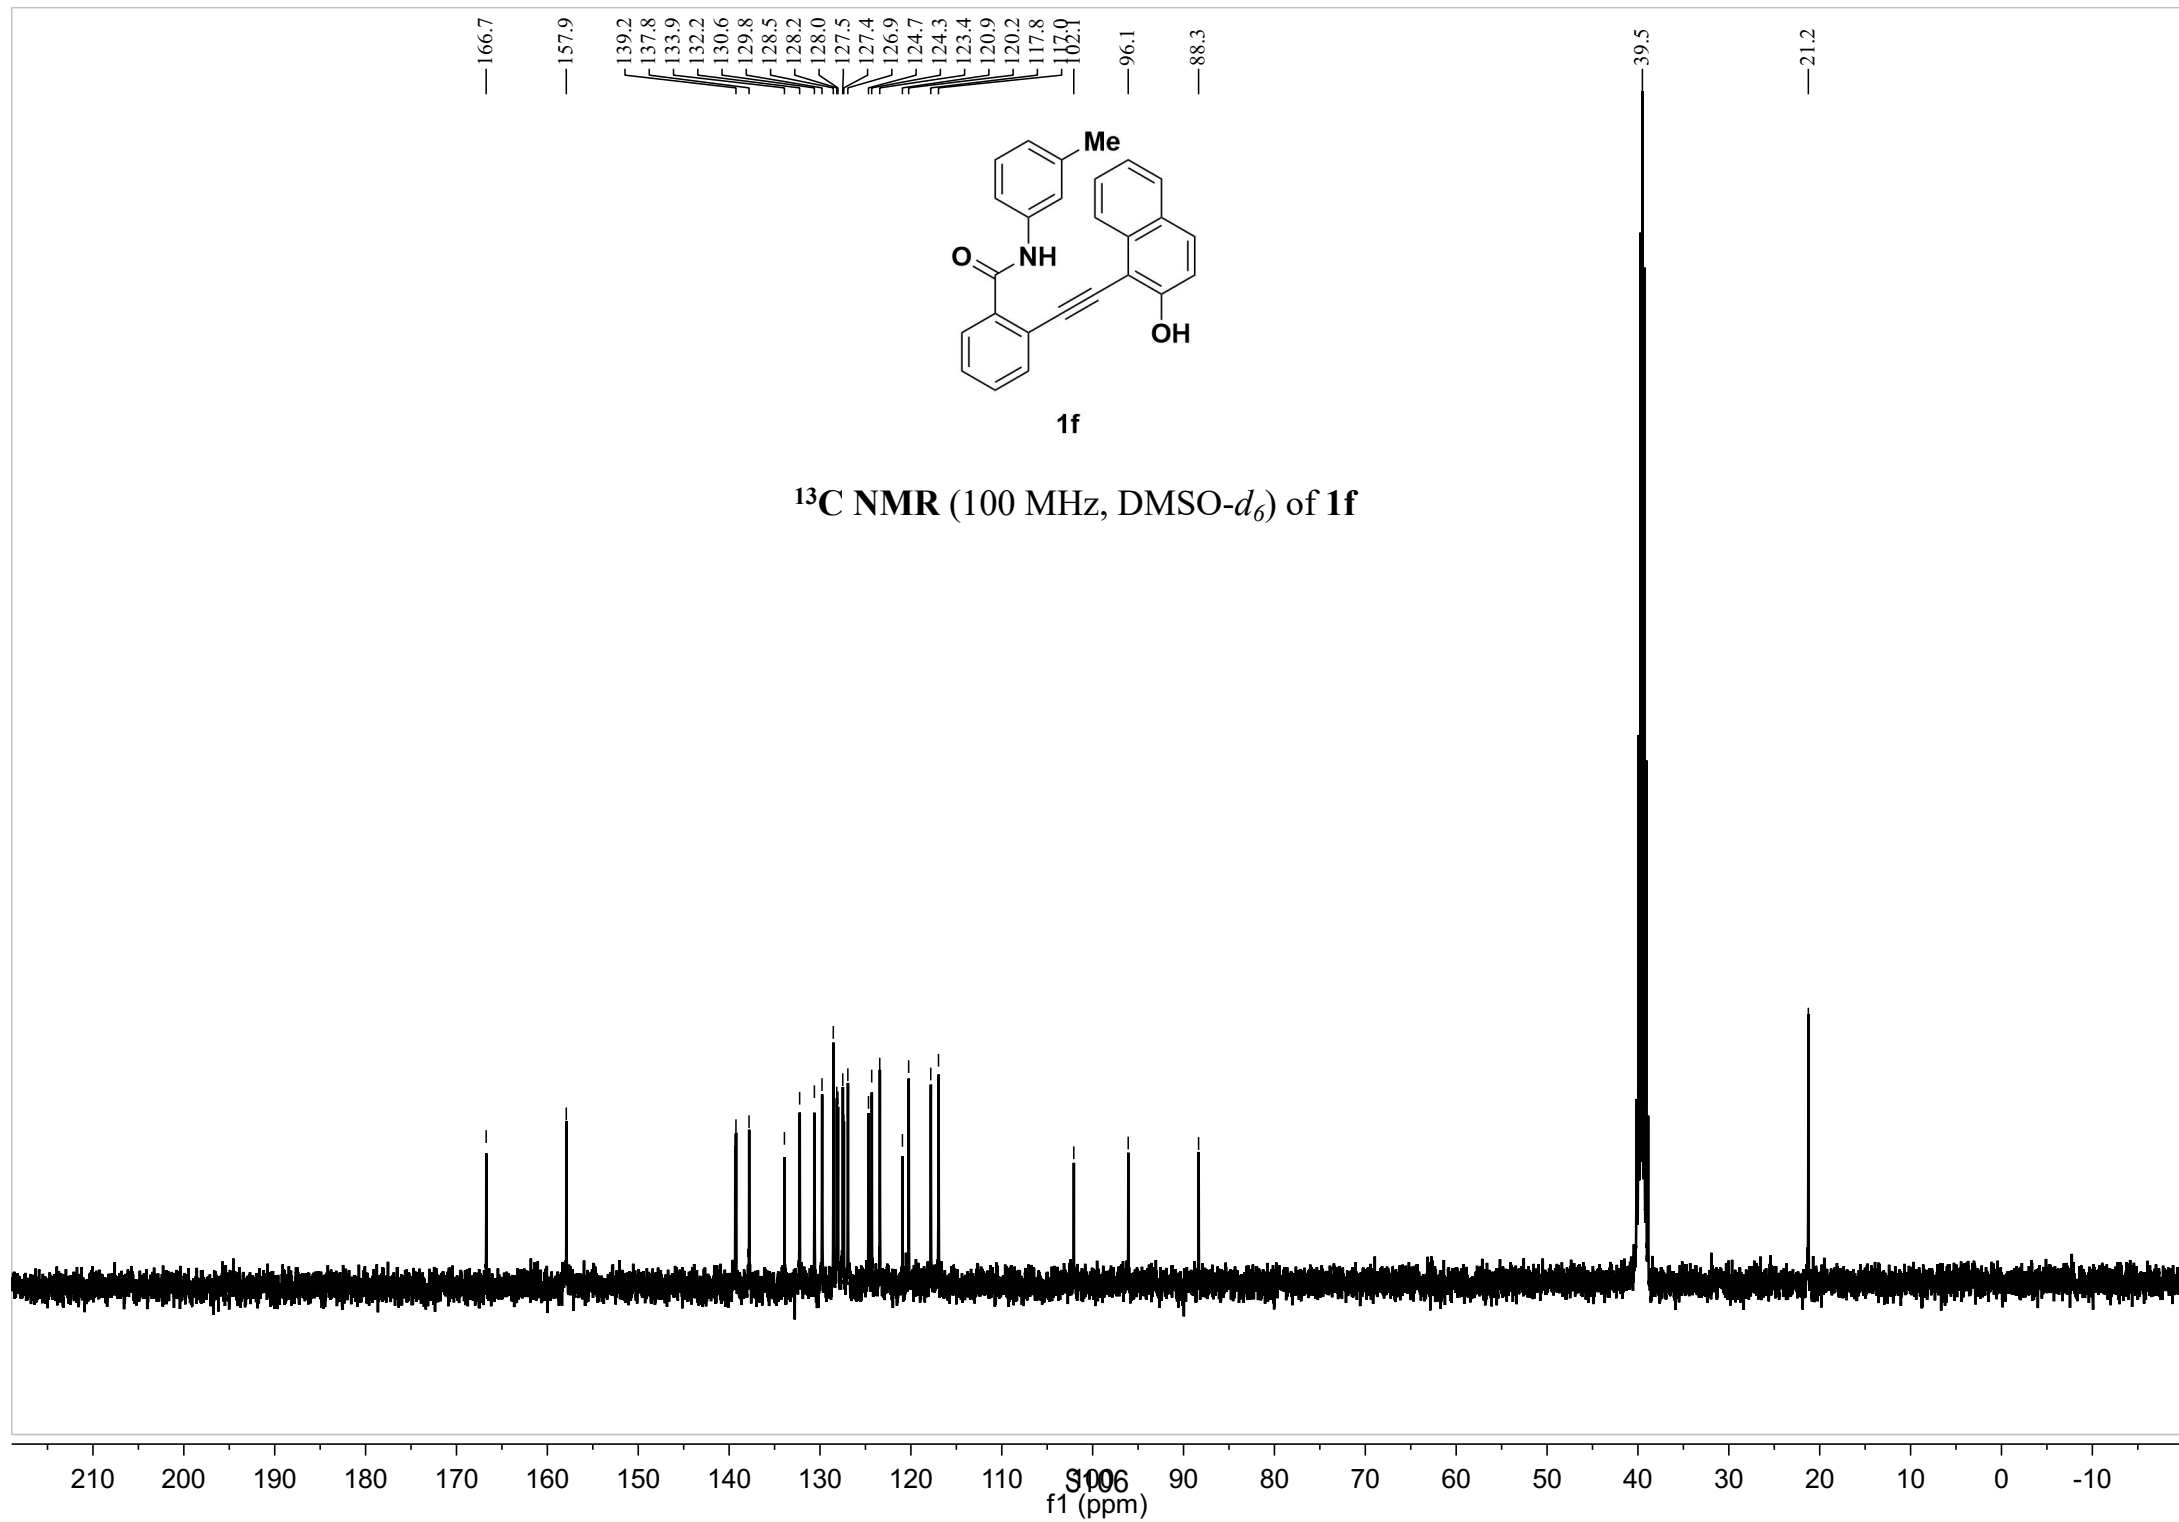

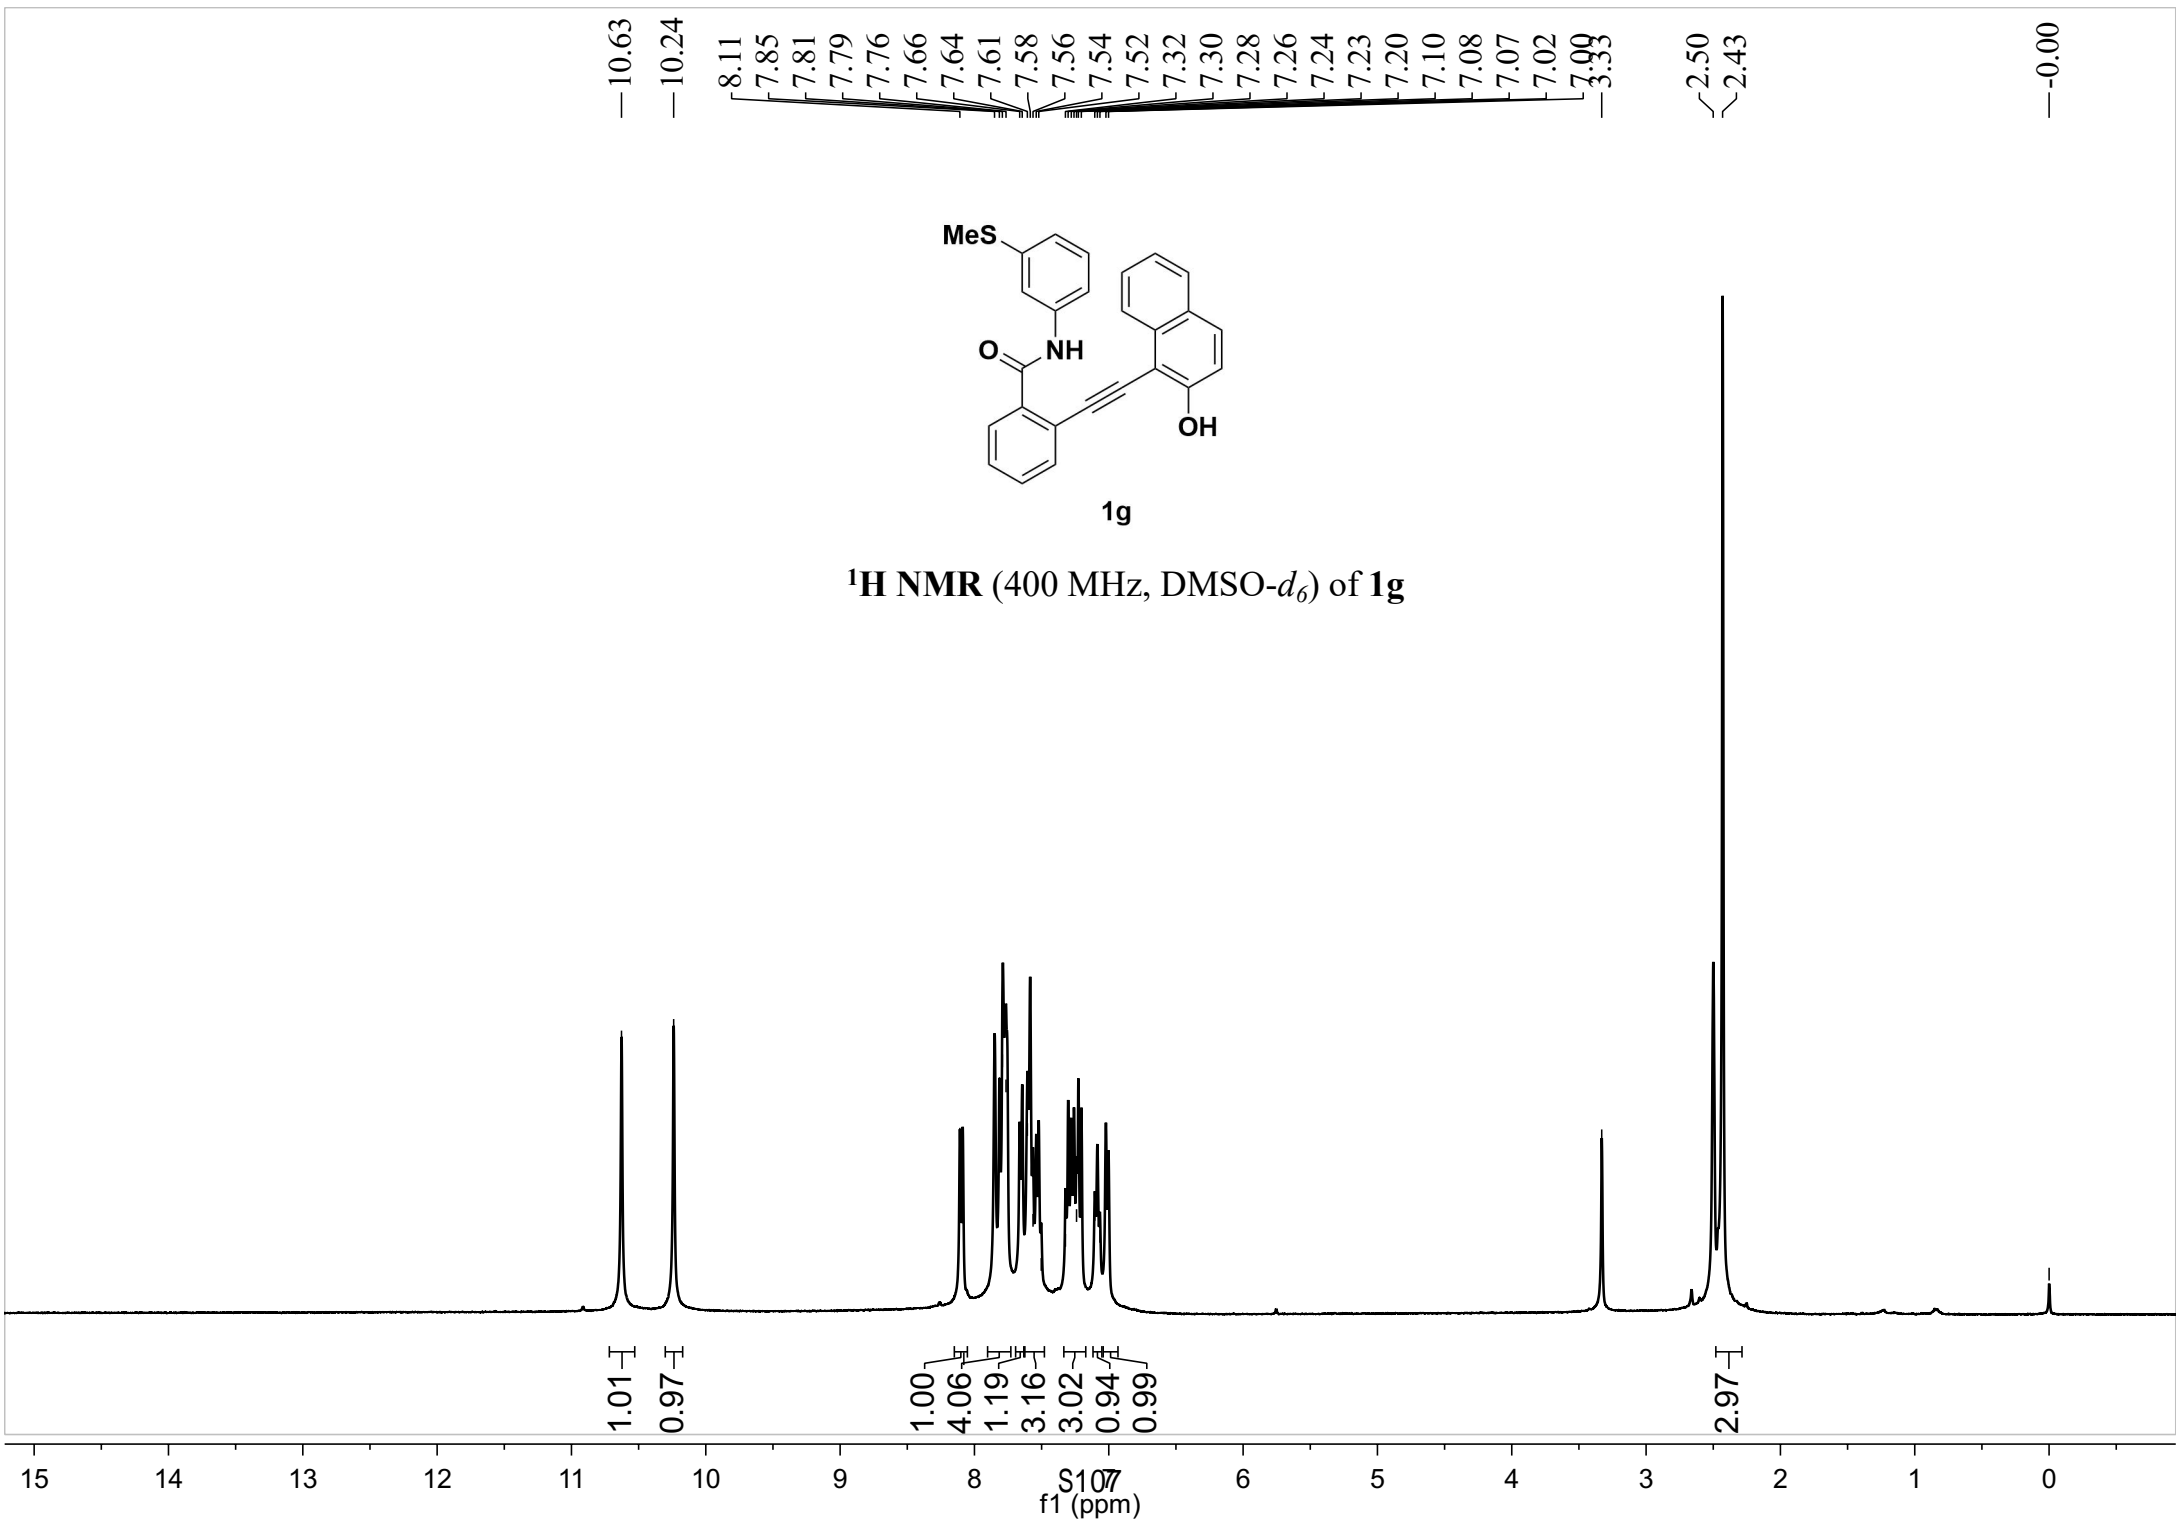

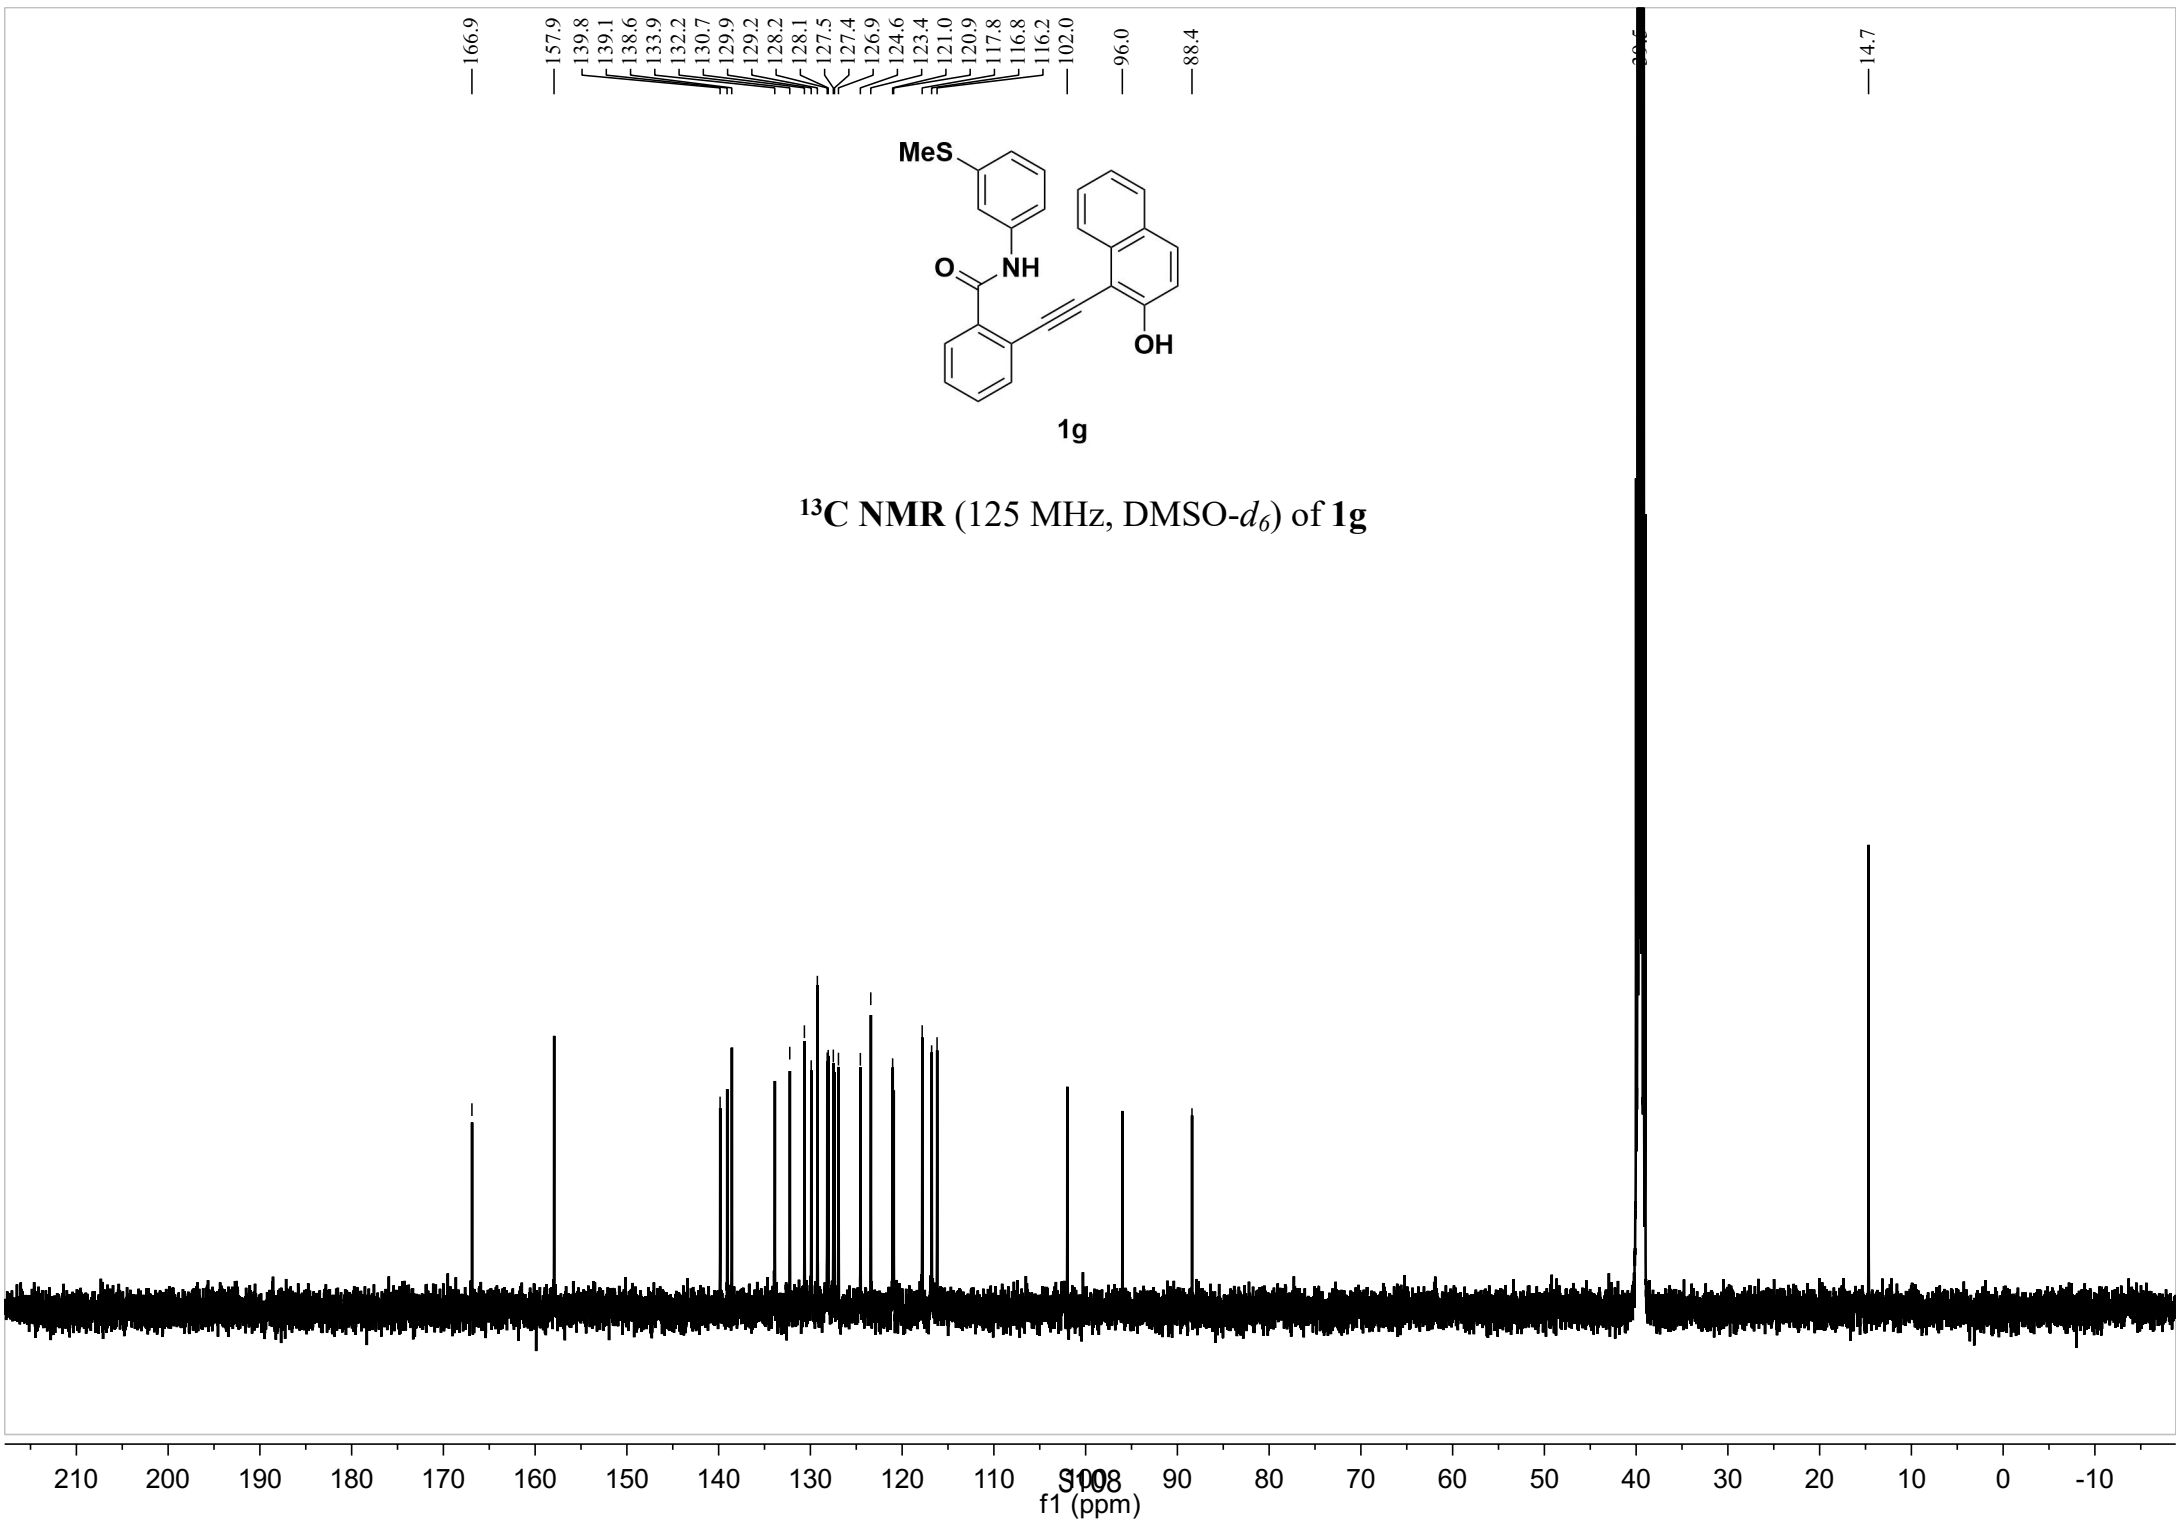

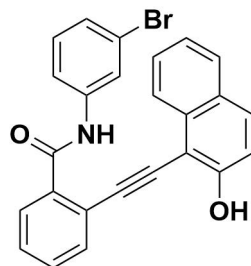

**1h**

**<sup>1</sup>H NMR (400 MHz, DMSO-*d*<sub>6</sub>) of **1h****

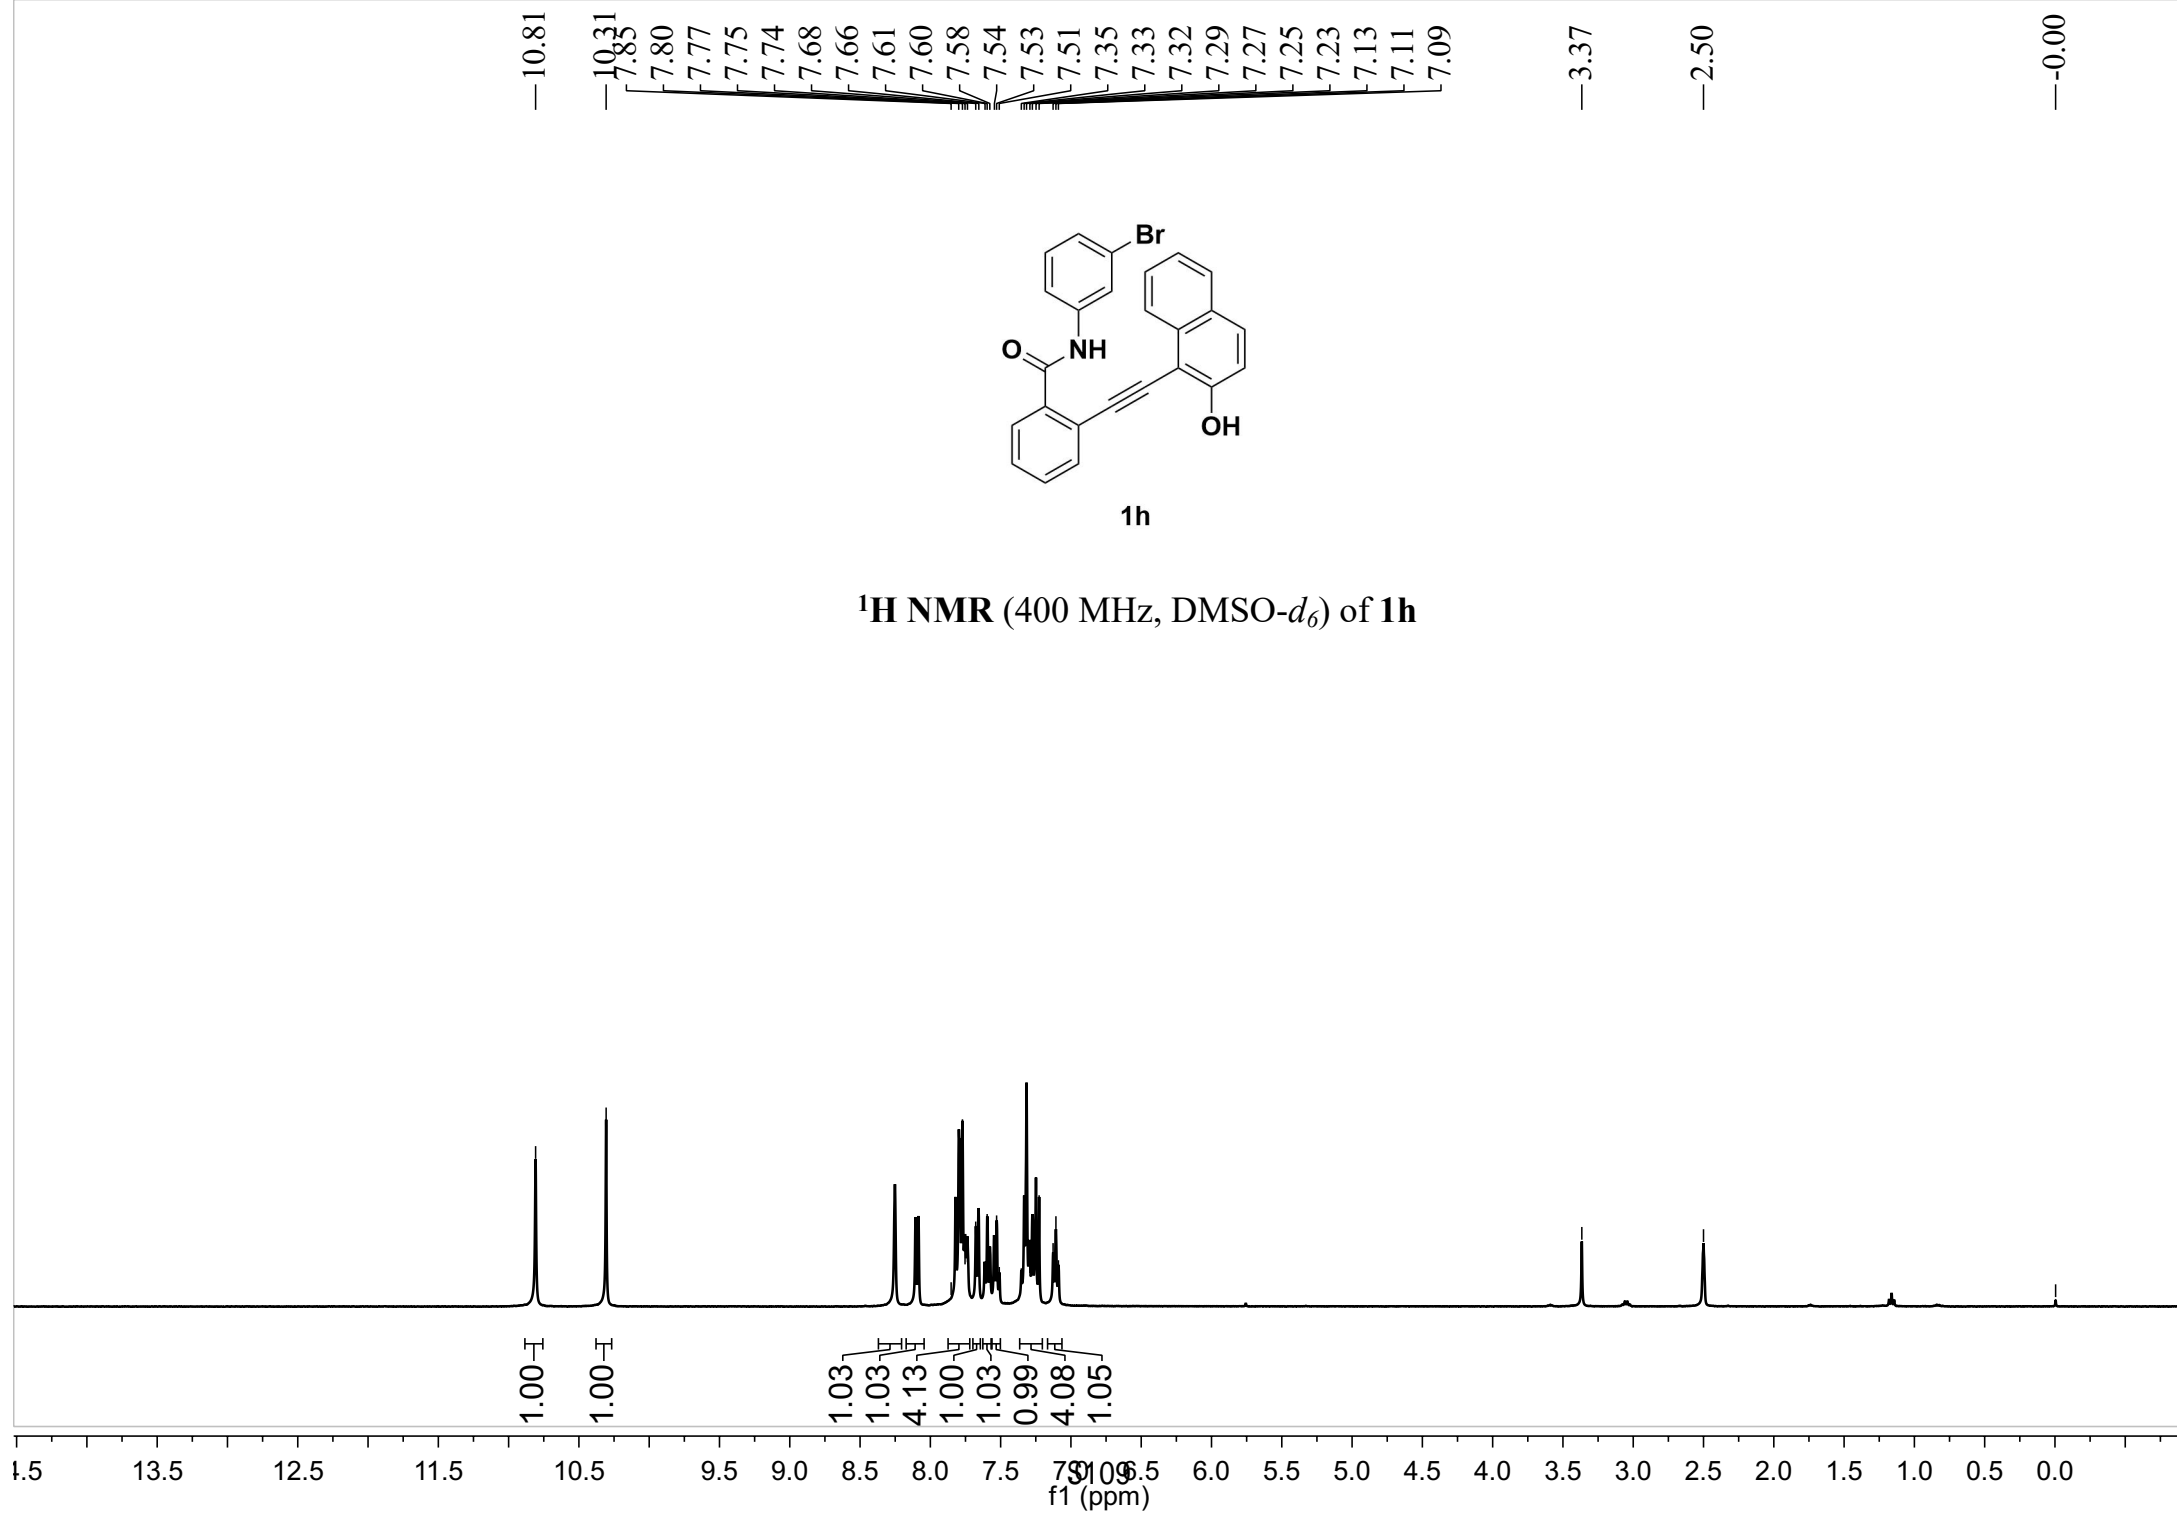

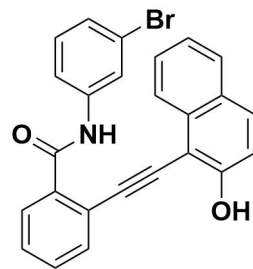

**1h**

<sup>13</sup>C NMR (100 MHz, DMSO-*d*<sub>6</sub>) of **1h**

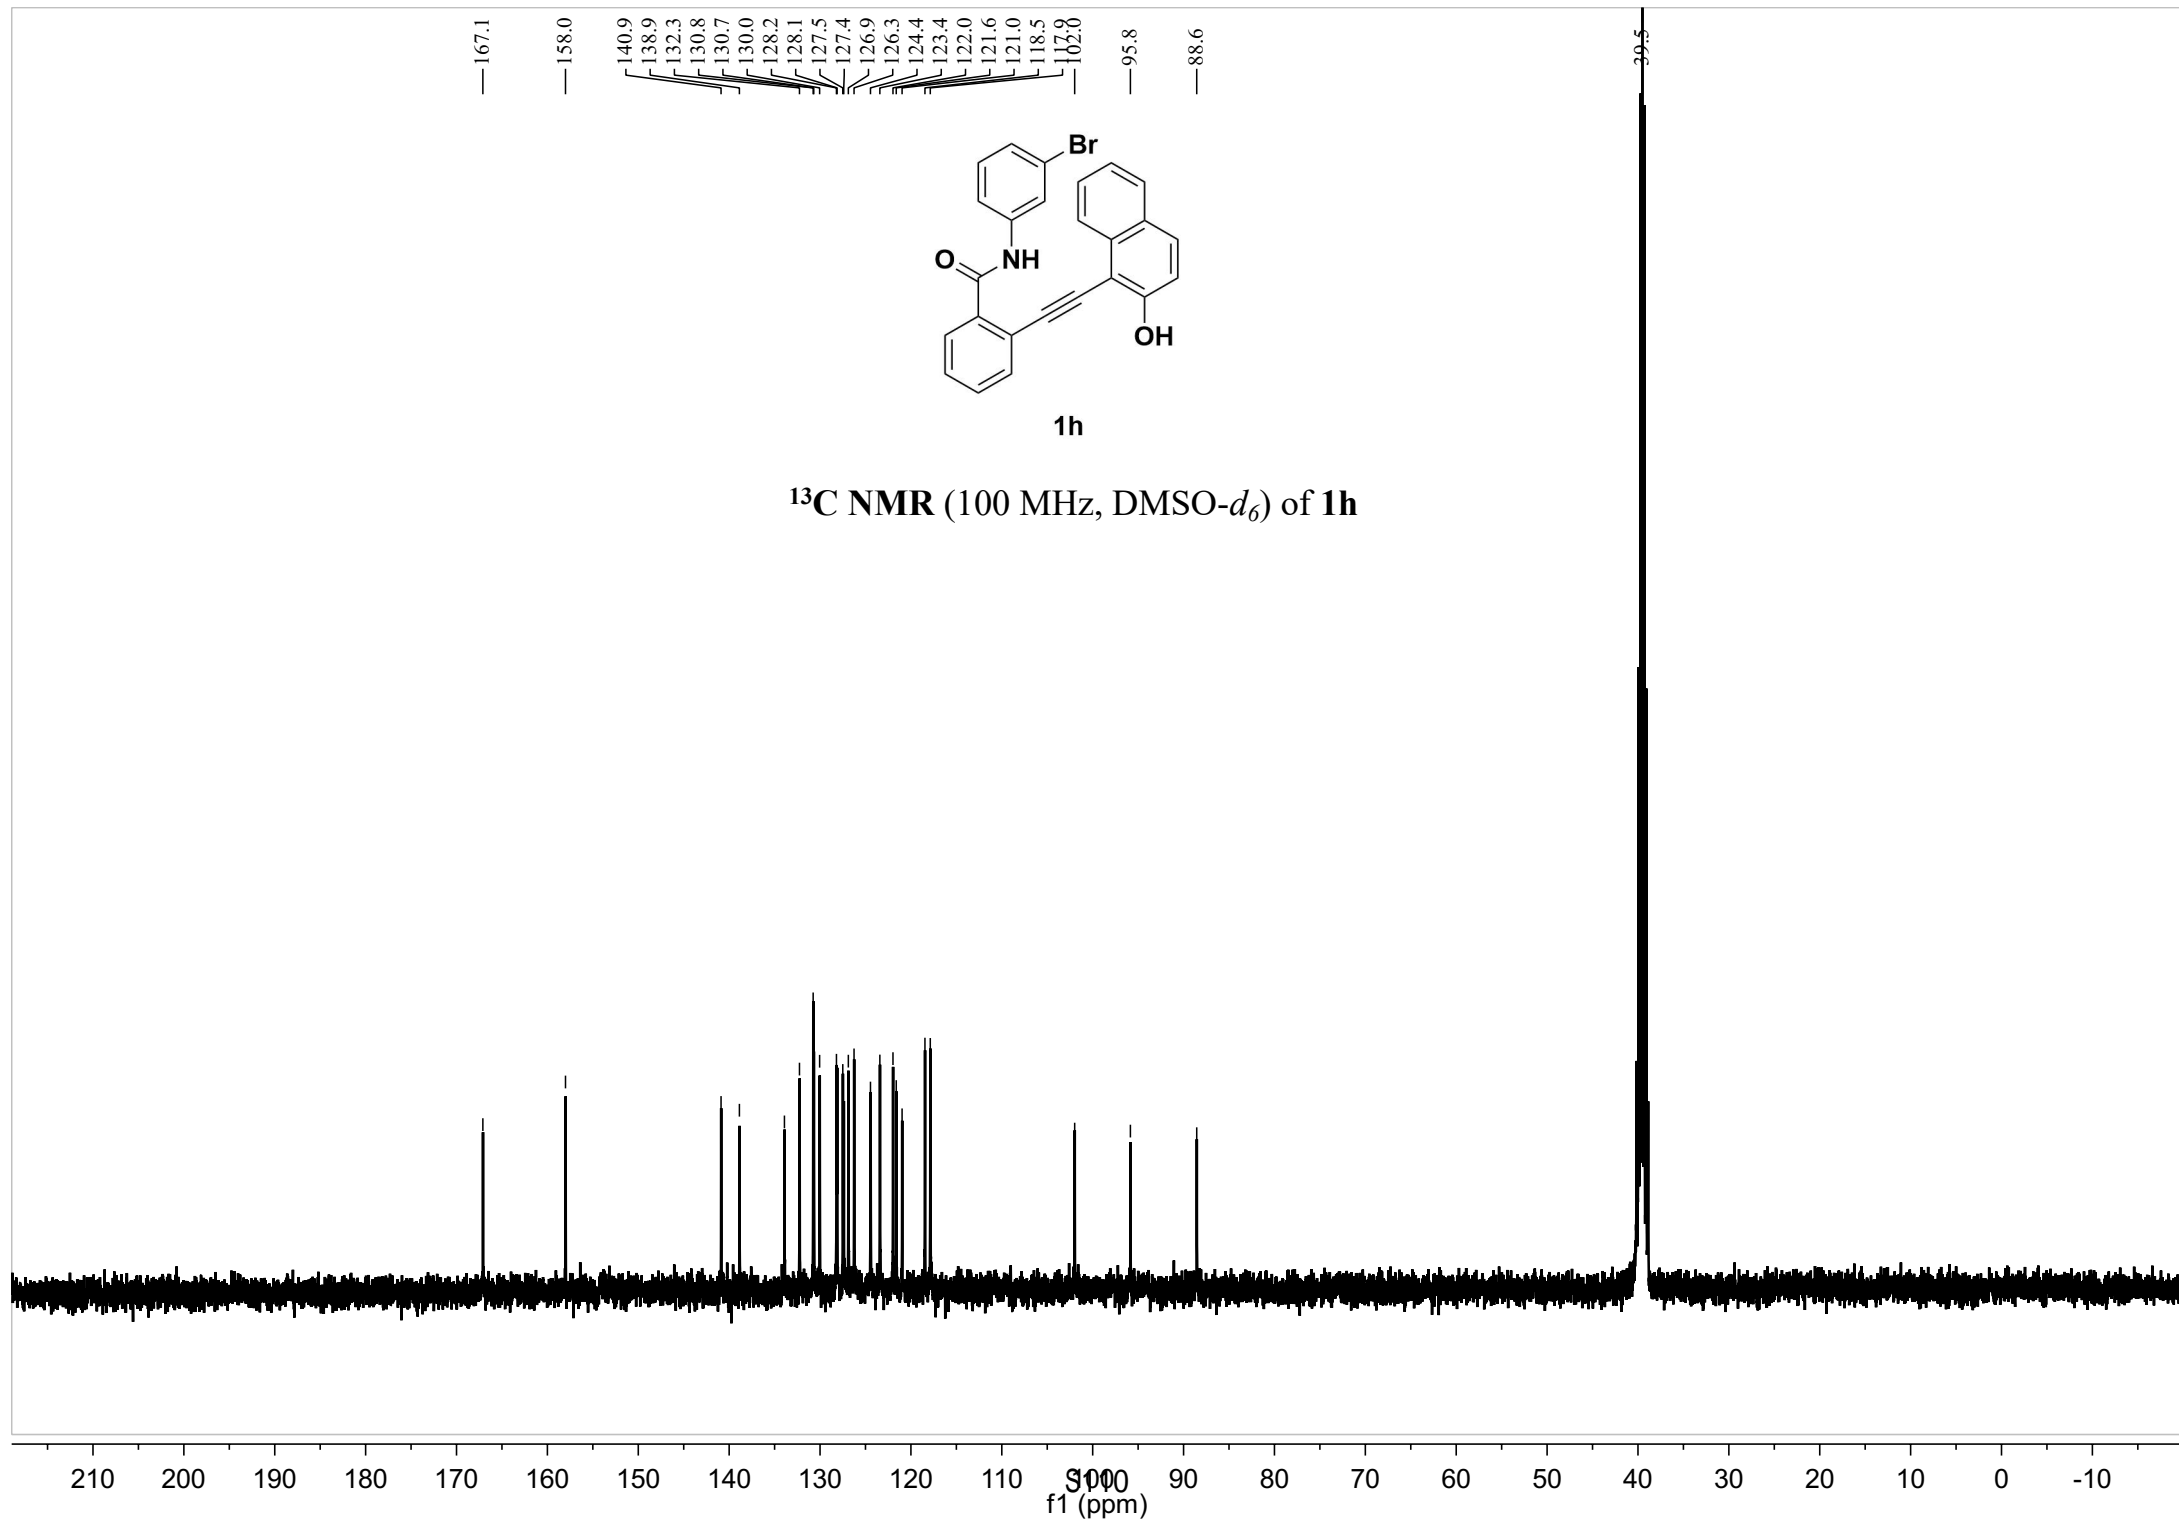

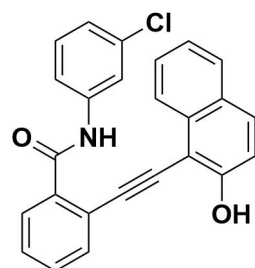

**1i**

$^1\text{H NMR}$  (400 MHz,  $\text{DMSO-}d_6$ ) of **1i**

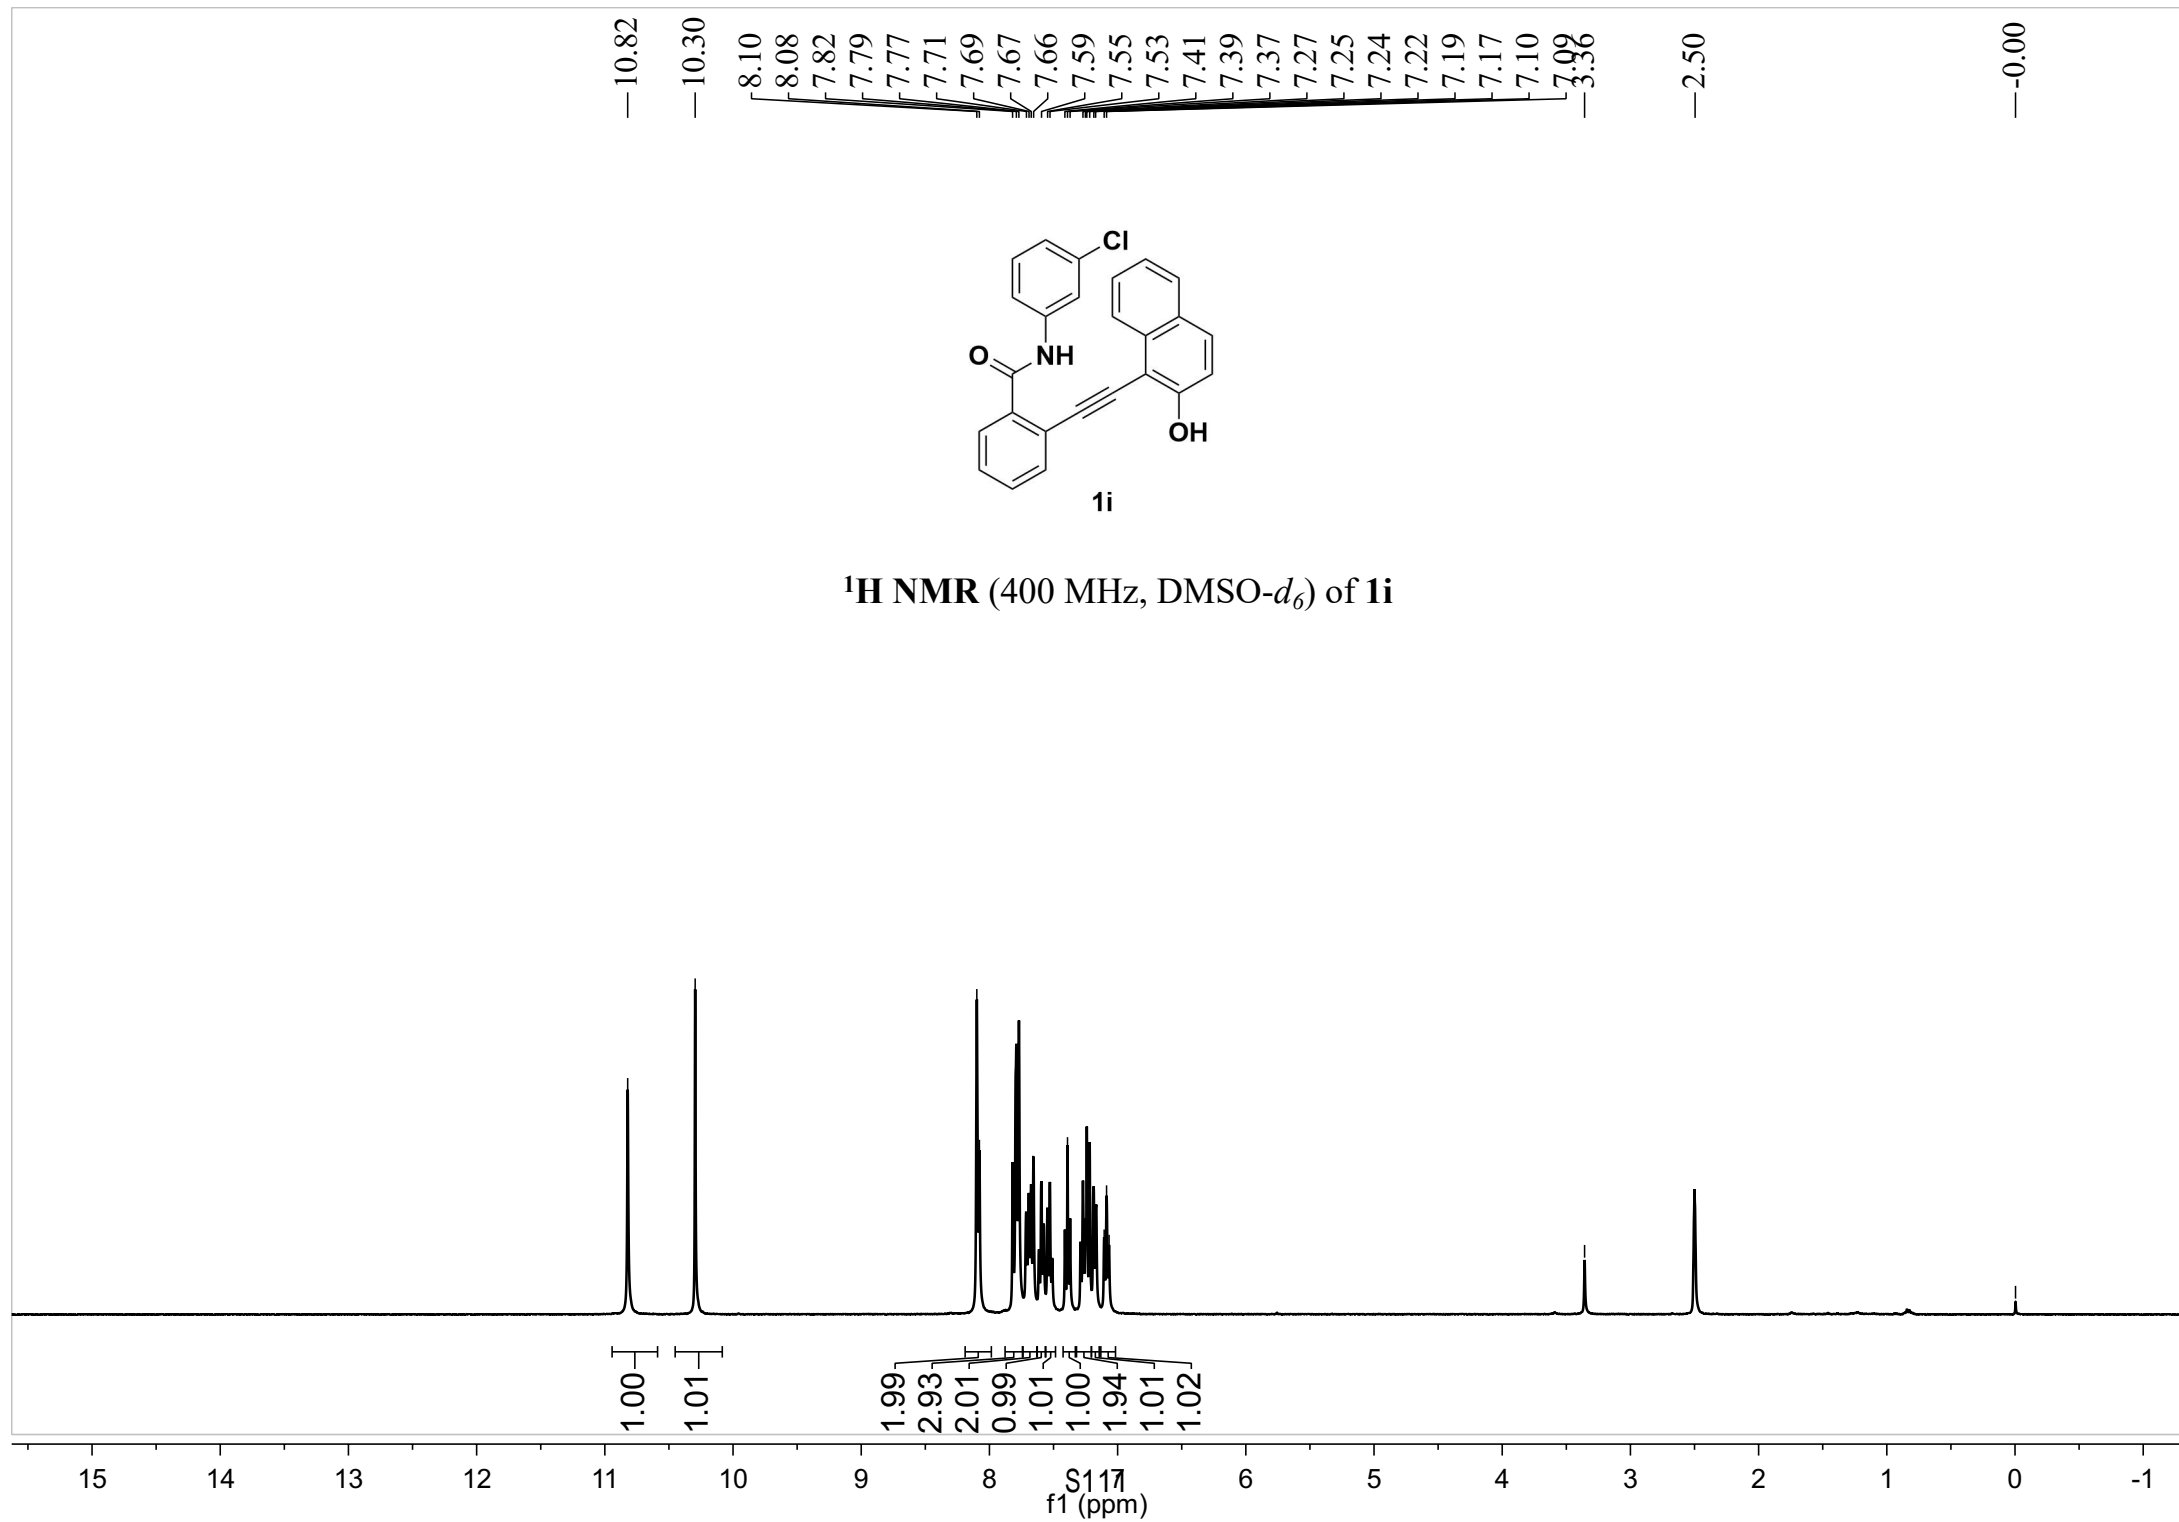

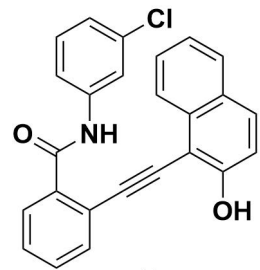

**1i**

$^{13}\text{C}$  NMR (100 MHz, DMSO- $d_6$ ) of **1i**

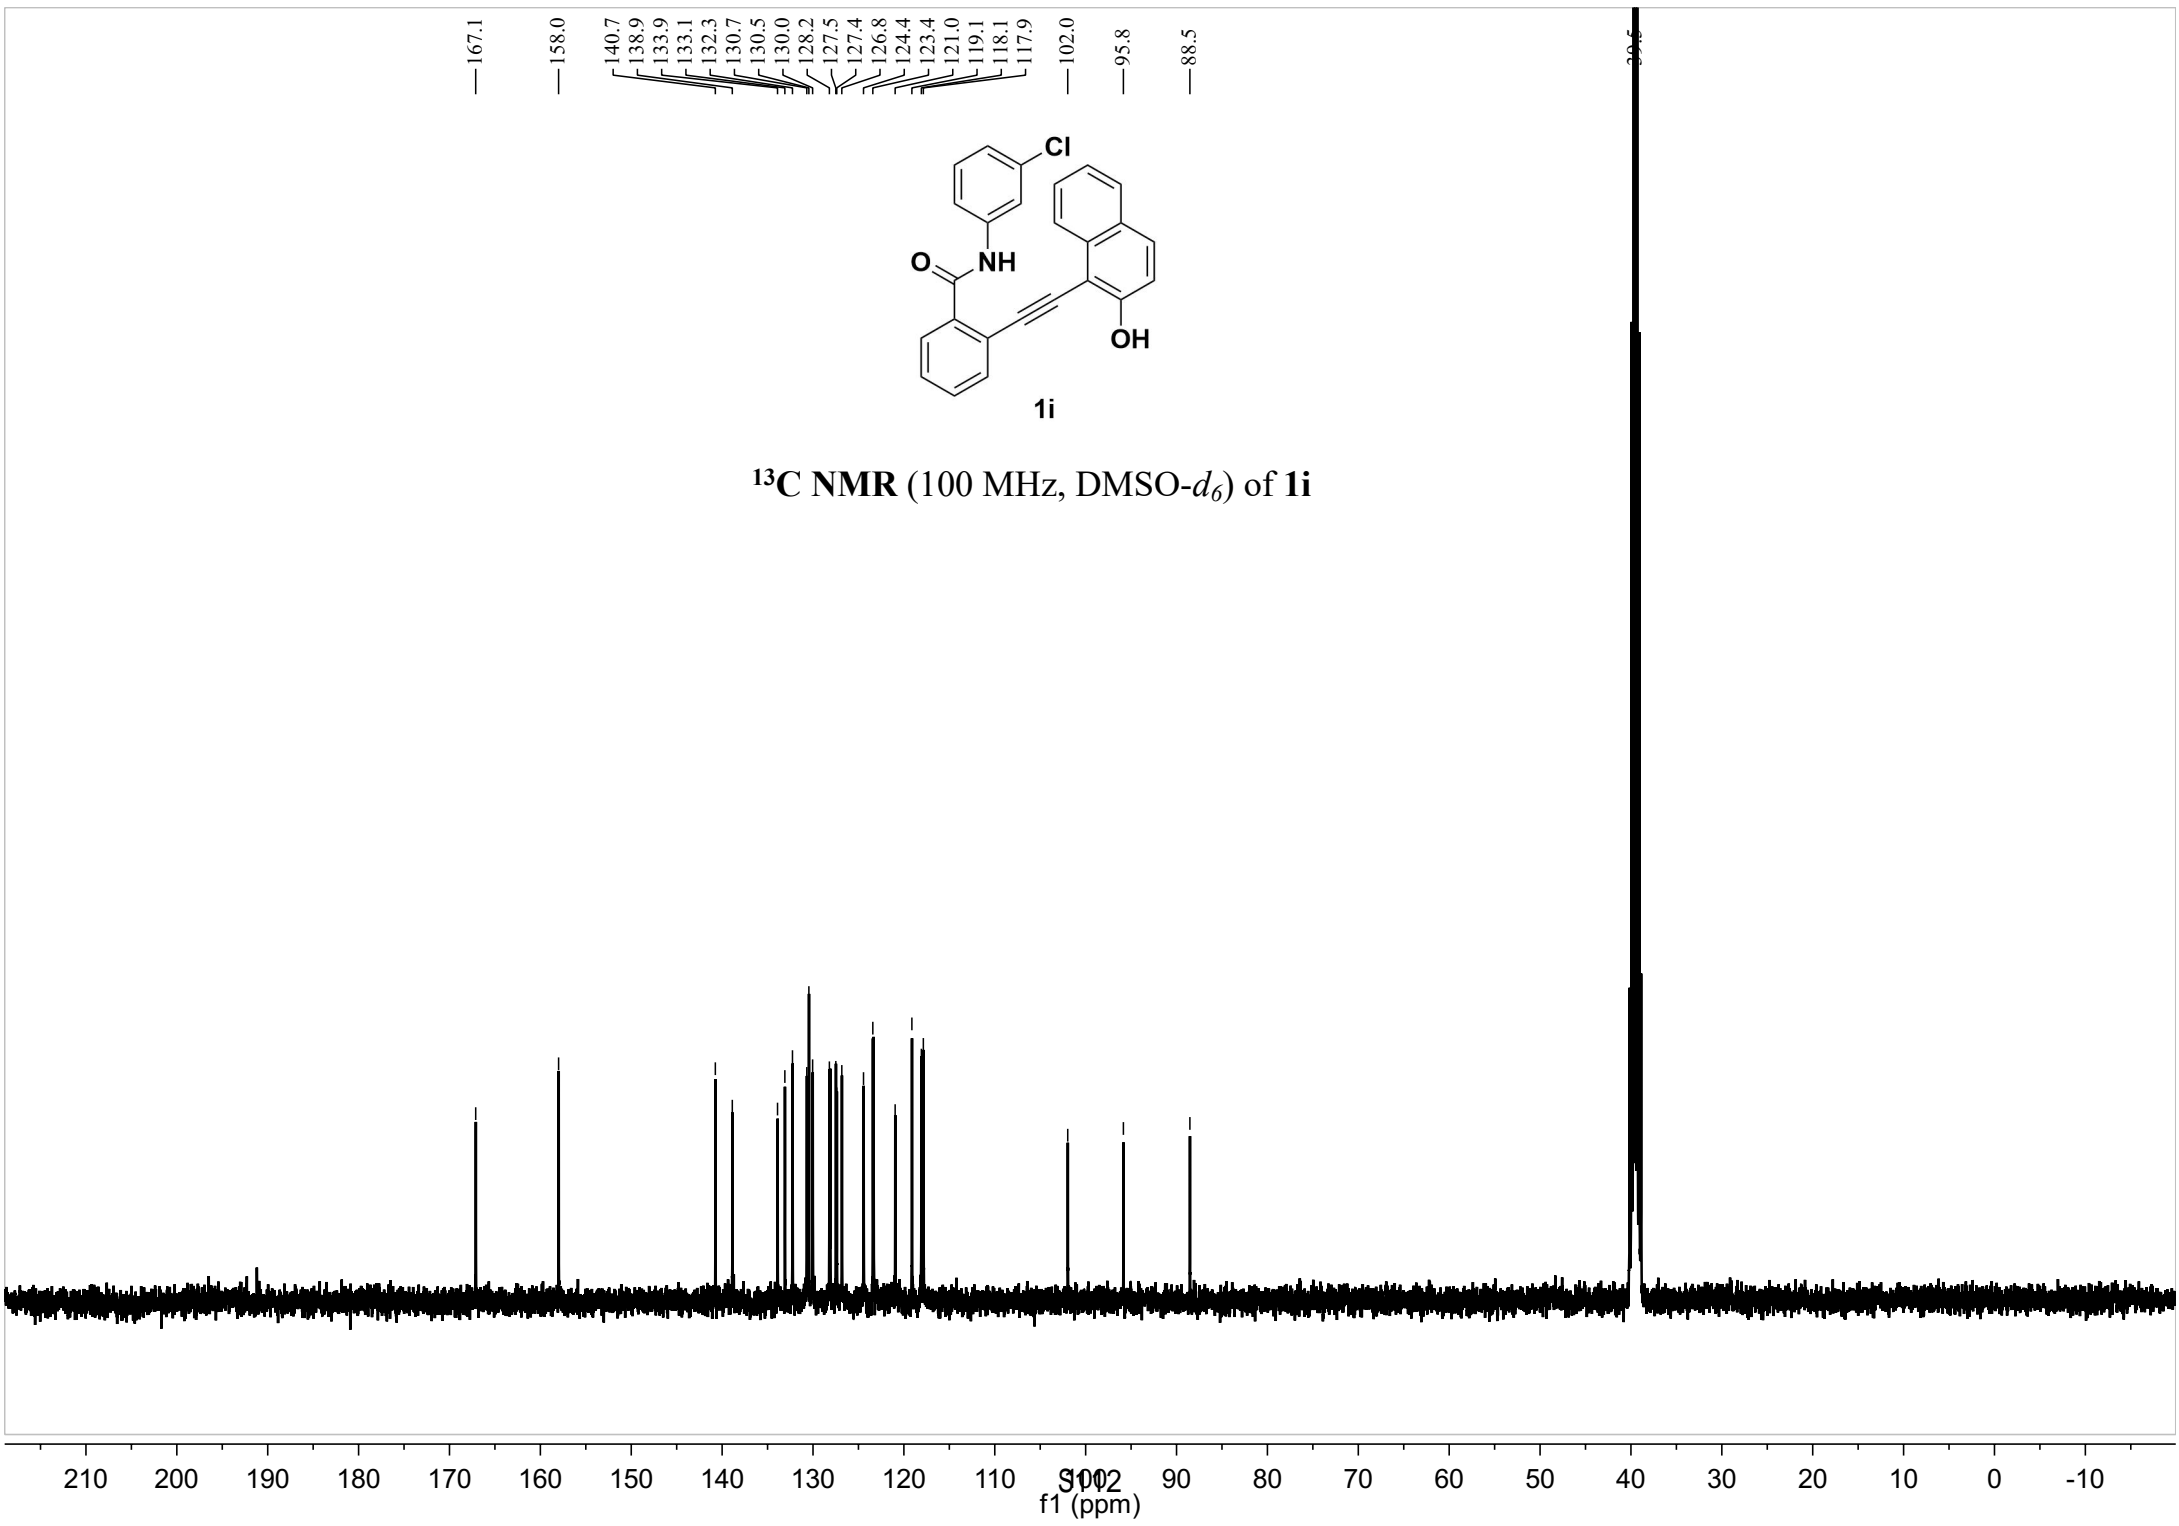



—10.53  
—10.21  
8.11  
8.09  
7.81  
7.79  
7.77  
7.76  
7.75  
7.66  
7.64  
7.59  
7.57  
7.56  
7.53  
7.51  
7.50  
7.26  
7.24  
7.23  
7.21  
7.19  
7.05  
7.03  
7.01

—3.35  
2.61  
2.60  
2.58  
2.56  
2.50

1.20  
1.18  
1.16

—0.00

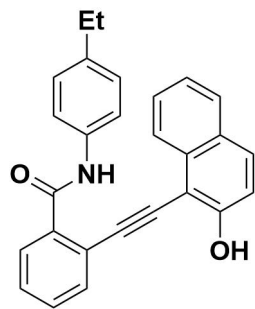

1j

<sup>1</sup>H NMR (400 MHz, DMSO-*d*<sub>6</sub>) of 1j

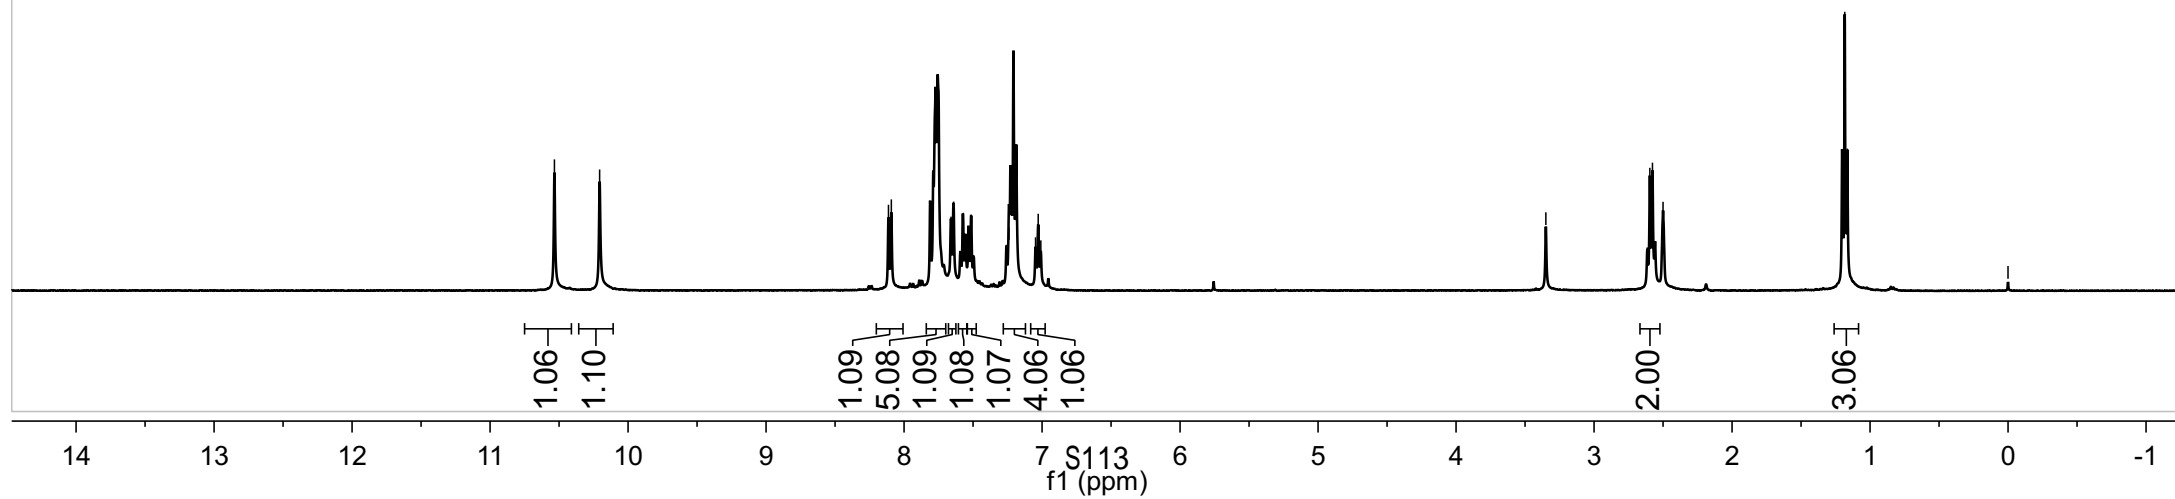

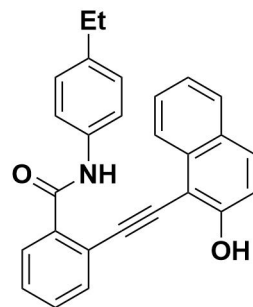

**1j**

$^{13}\text{C}$  NMR (100 MHz,  $\text{DMSO-}d_6$ ) of **1j**

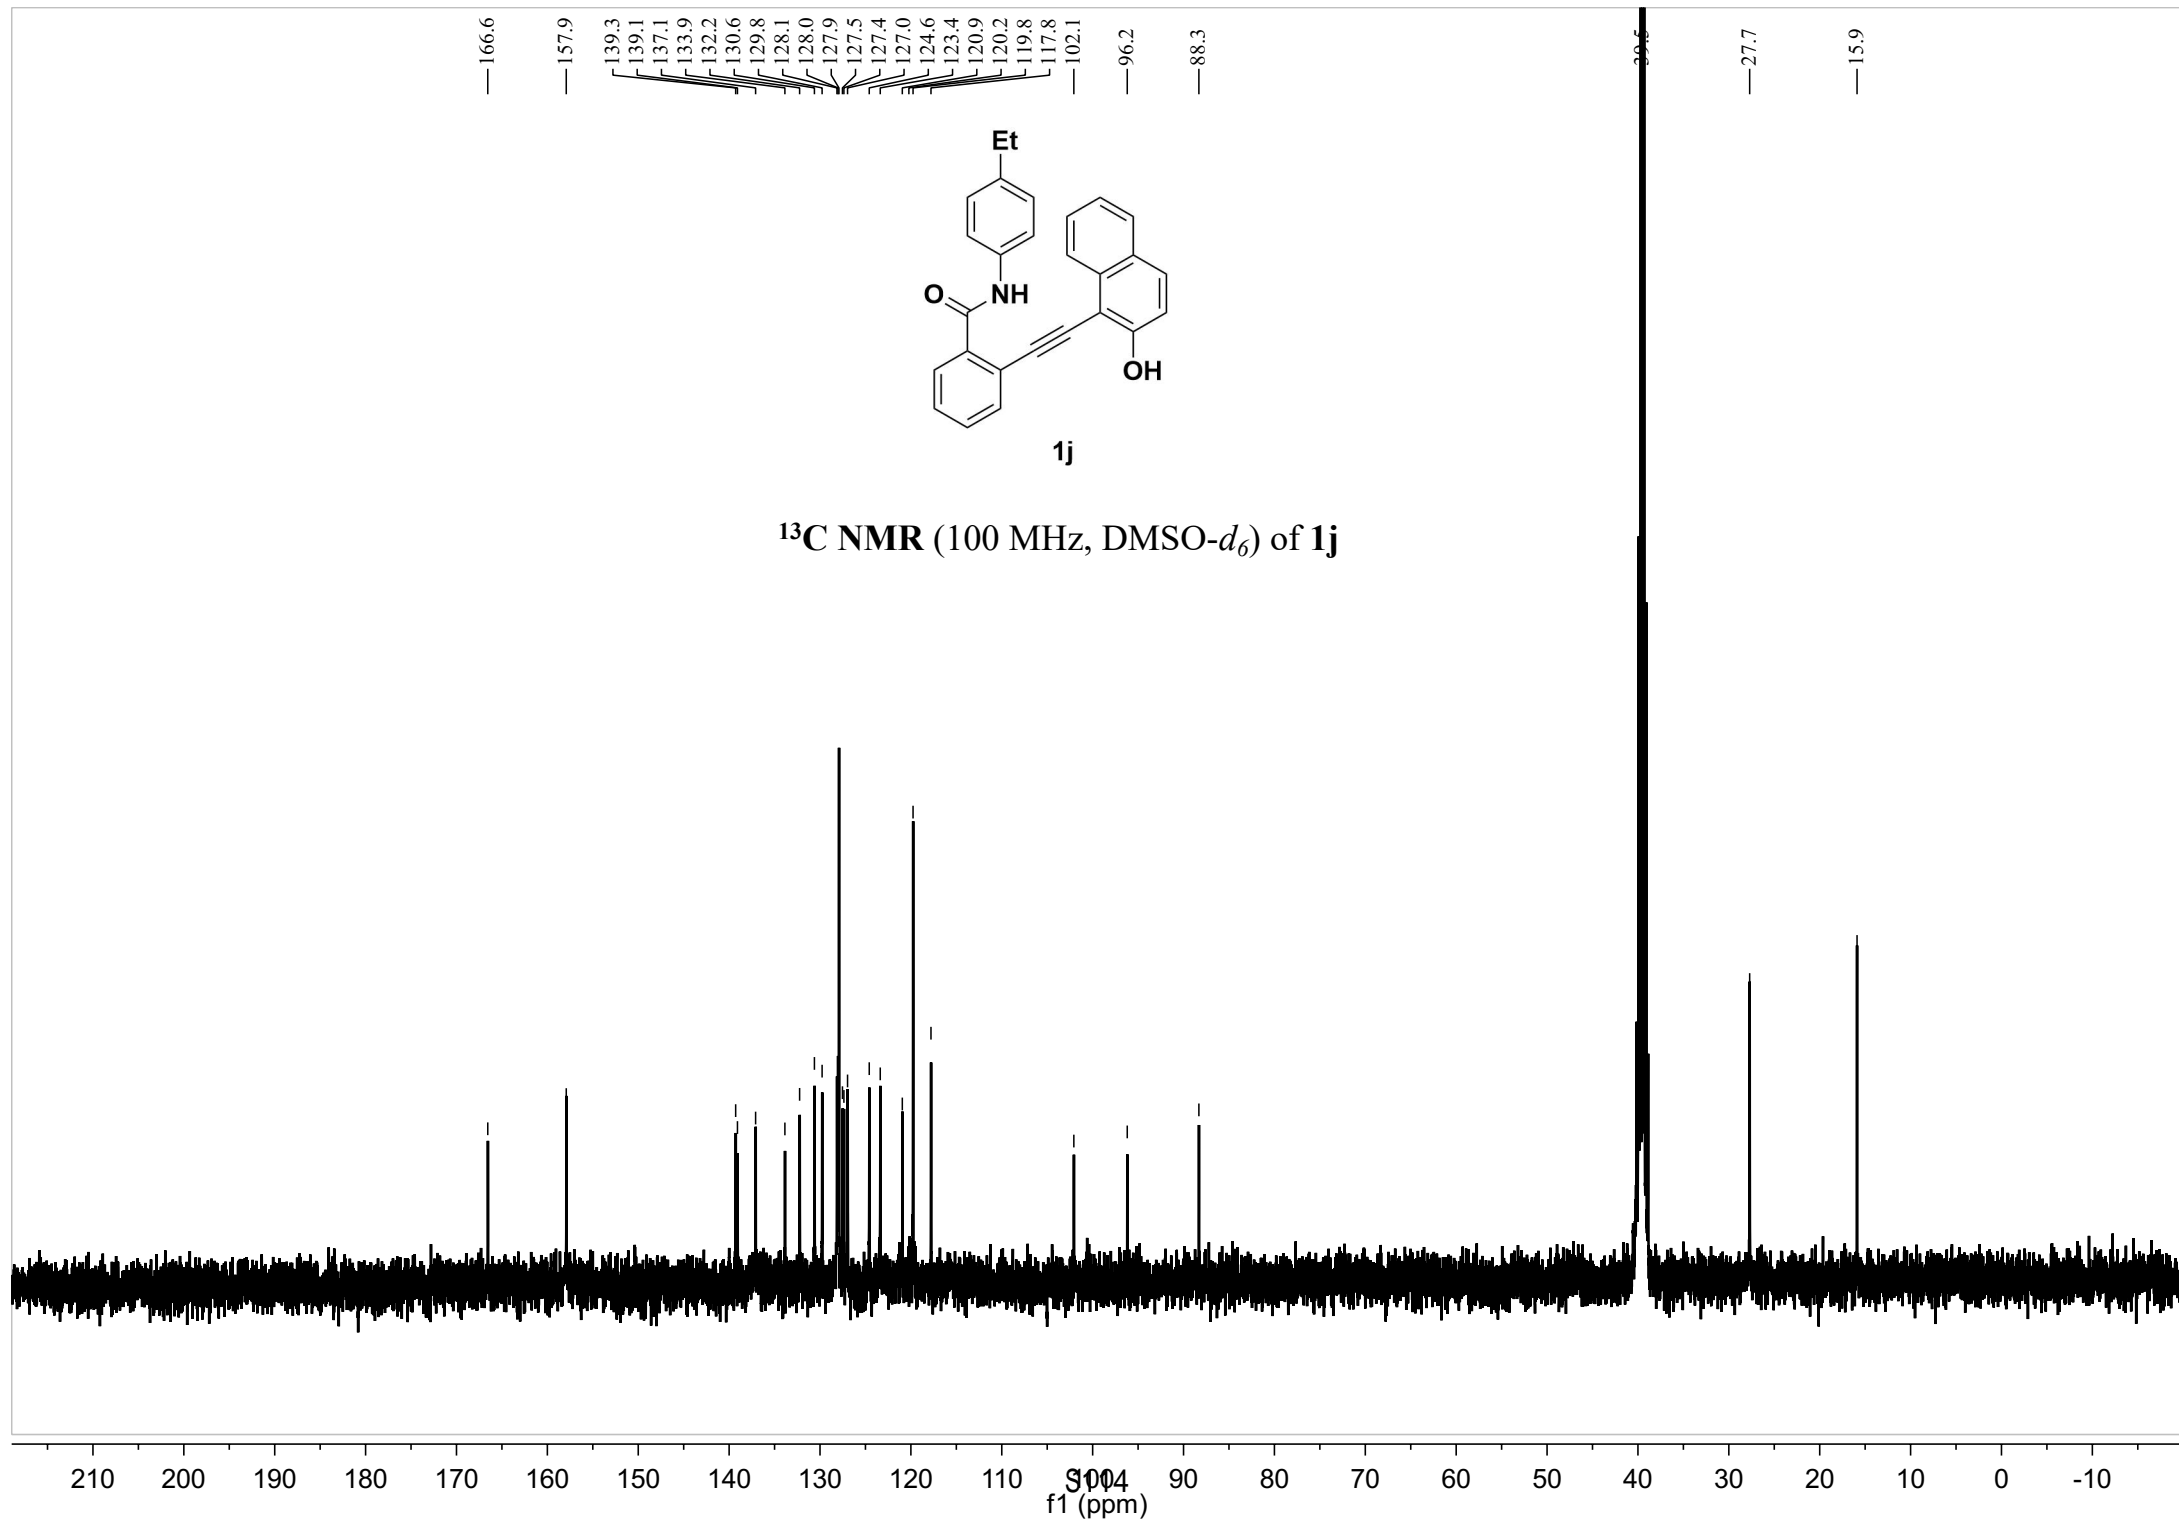

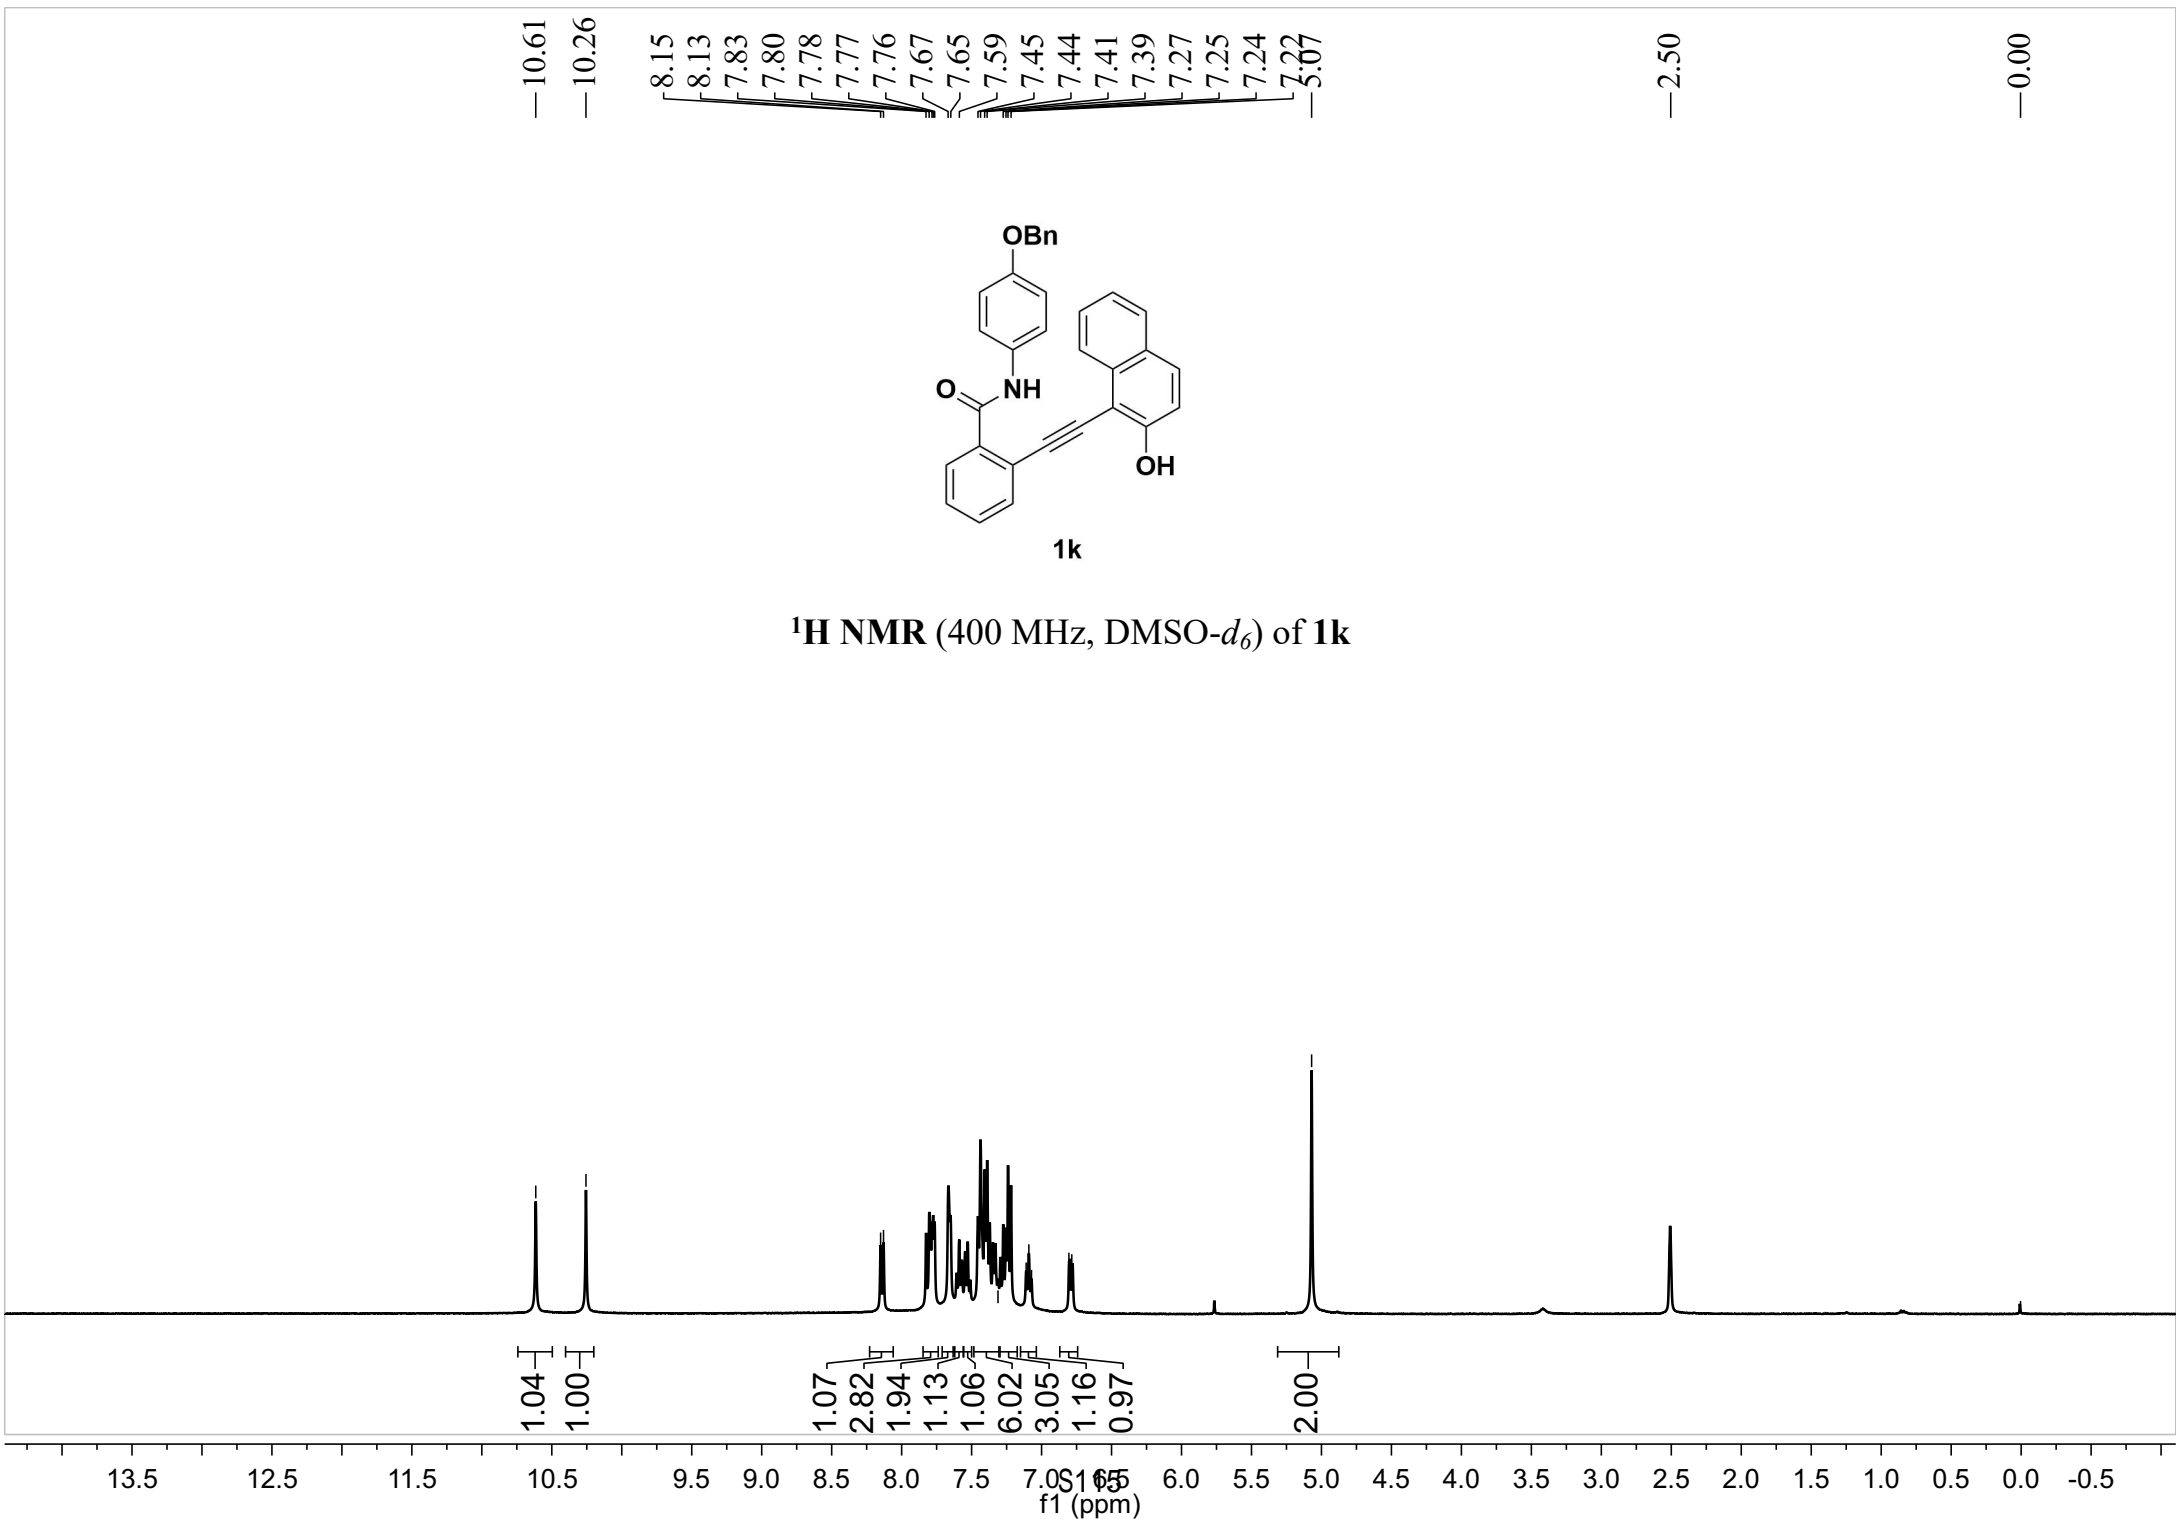

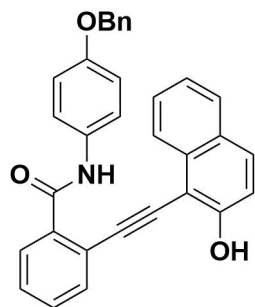

1k

$^{13}\text{C}$  NMR (100 MHz, DMSO- $d_6$ ) of 1k

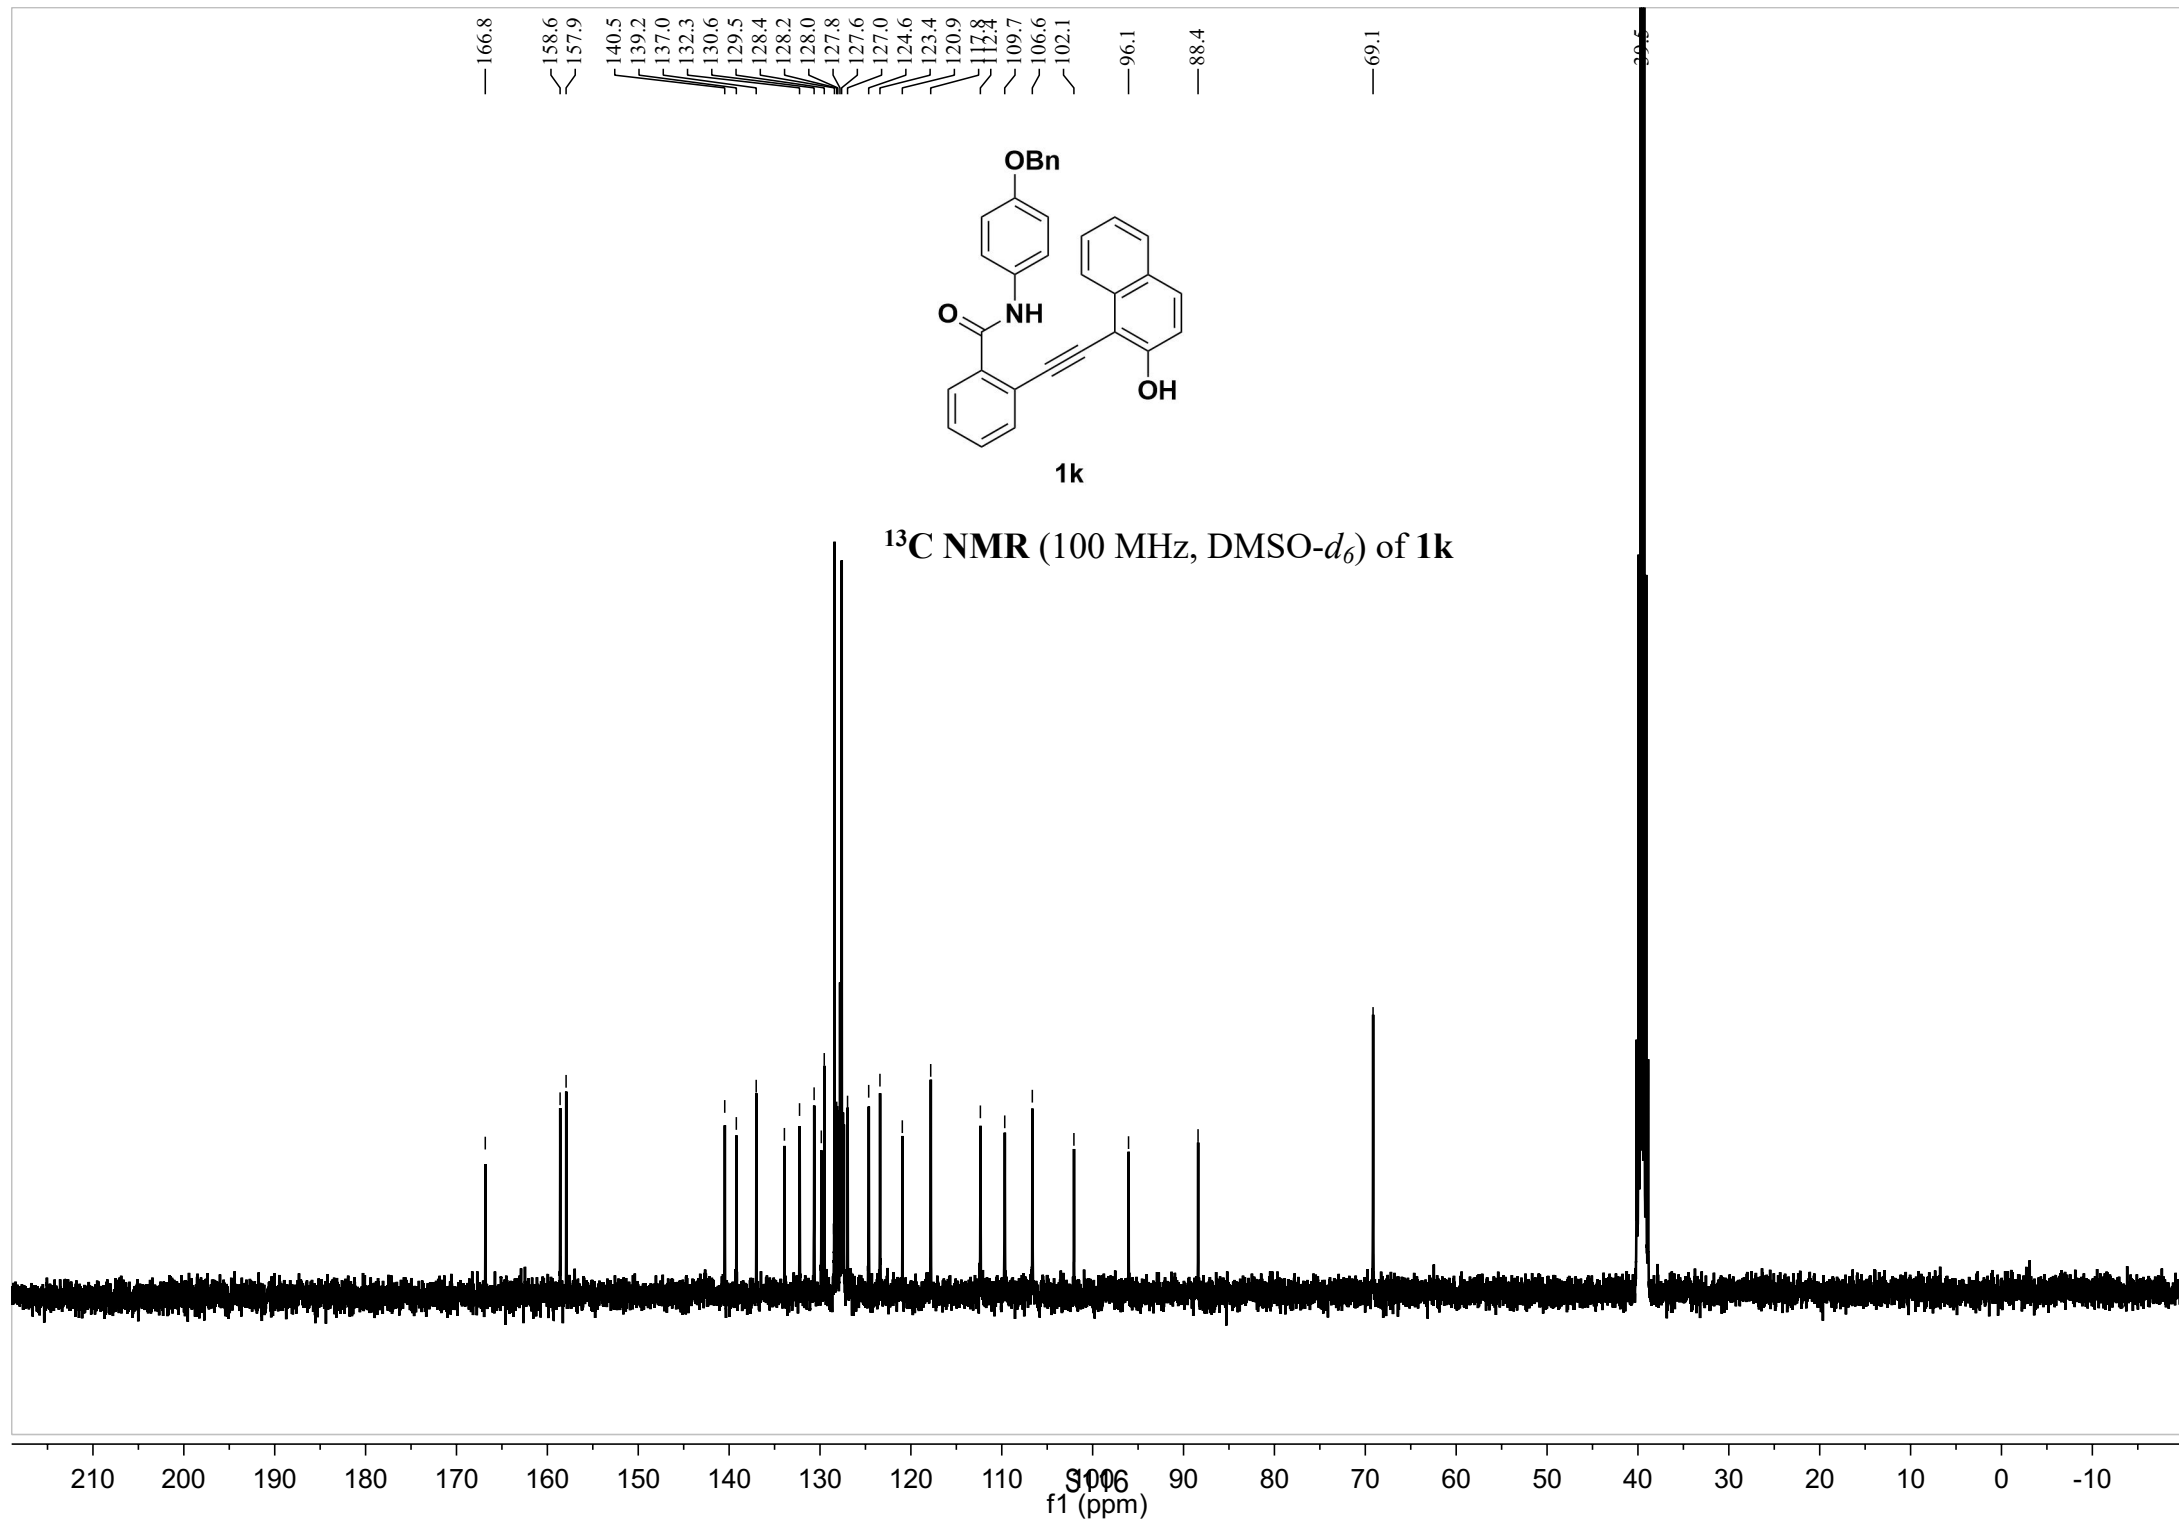

10.69  
10.26  
8.10  
8.08  
7.90  
7.89  
7.88  
7.87  
7.82  
7.79  
7.77  
7.67  
7.65  
7.60  
7.59  
7.56  
7.54  
7.52  
7.50  
7.29  
7.27  
7.25  
7.24  
7.22  
7.20  
7.11  
7.09  
7.07  
2.50  
0.00

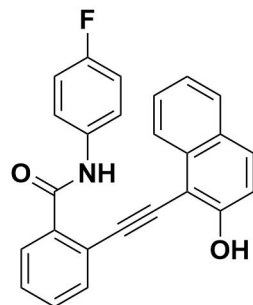

11

<sup>1</sup>H NMR (400 MHz, DMSO-*d*<sub>6</sub>) of 11

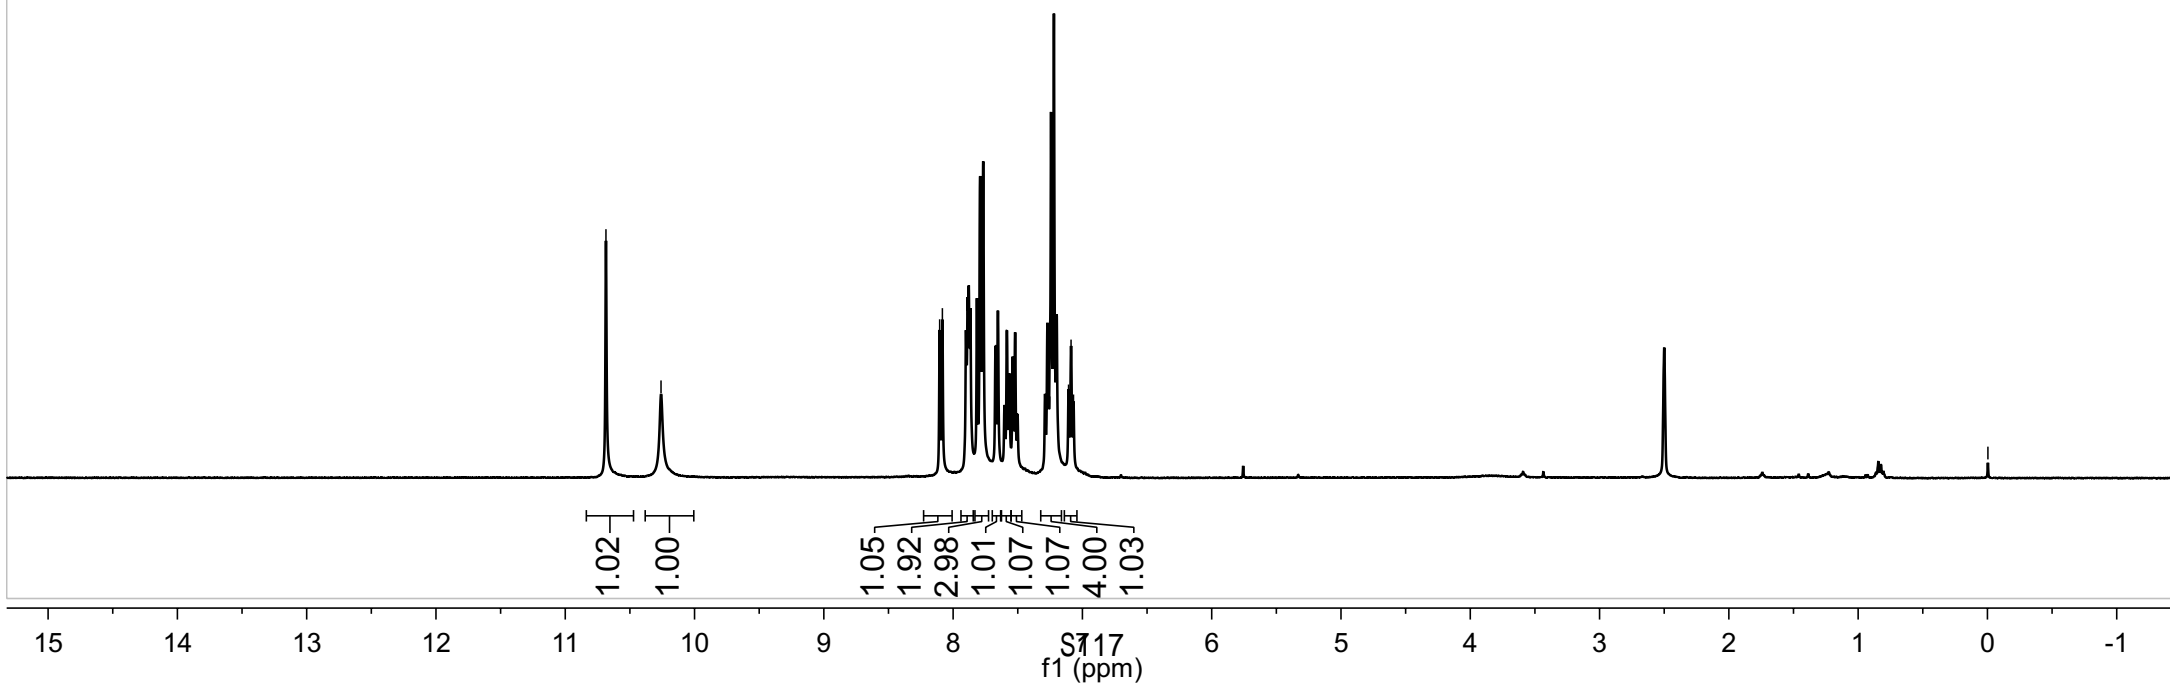

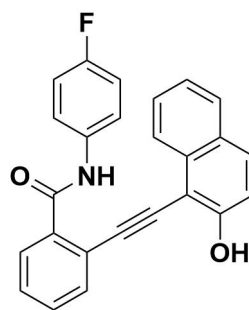

**11**

**$^{19}\text{F}$  NMR (376 MHz, DMSO) of **11****

---118.79

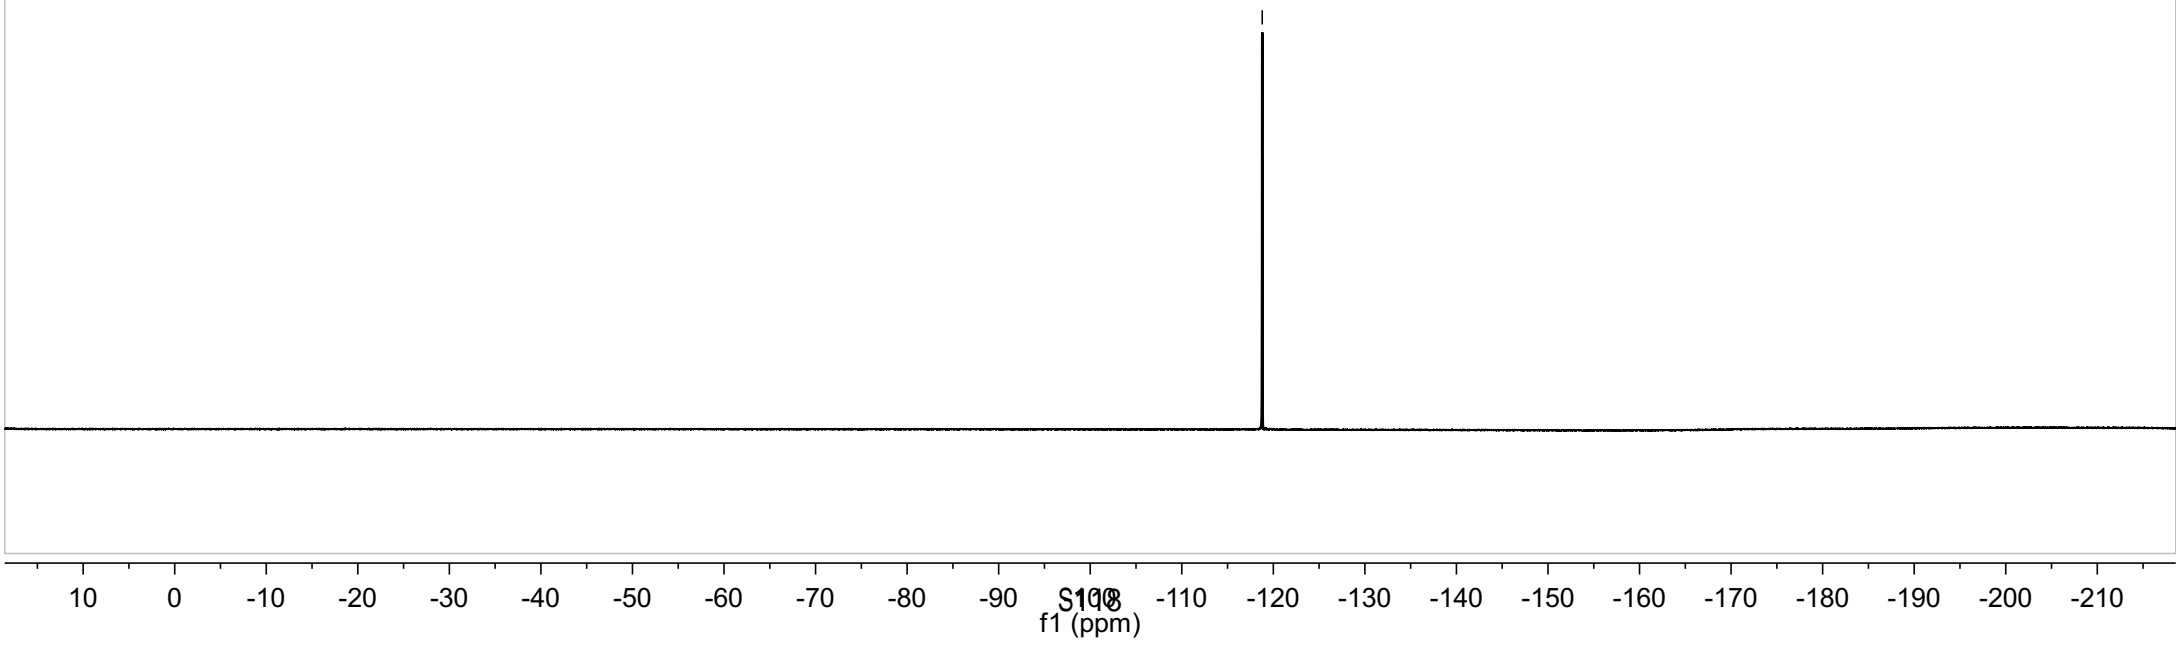

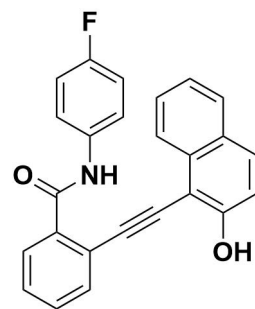

**11**

$^{13}\text{C}$  NMR (125 MHz,  $\text{DMSO-}d_6$ ) of **11**

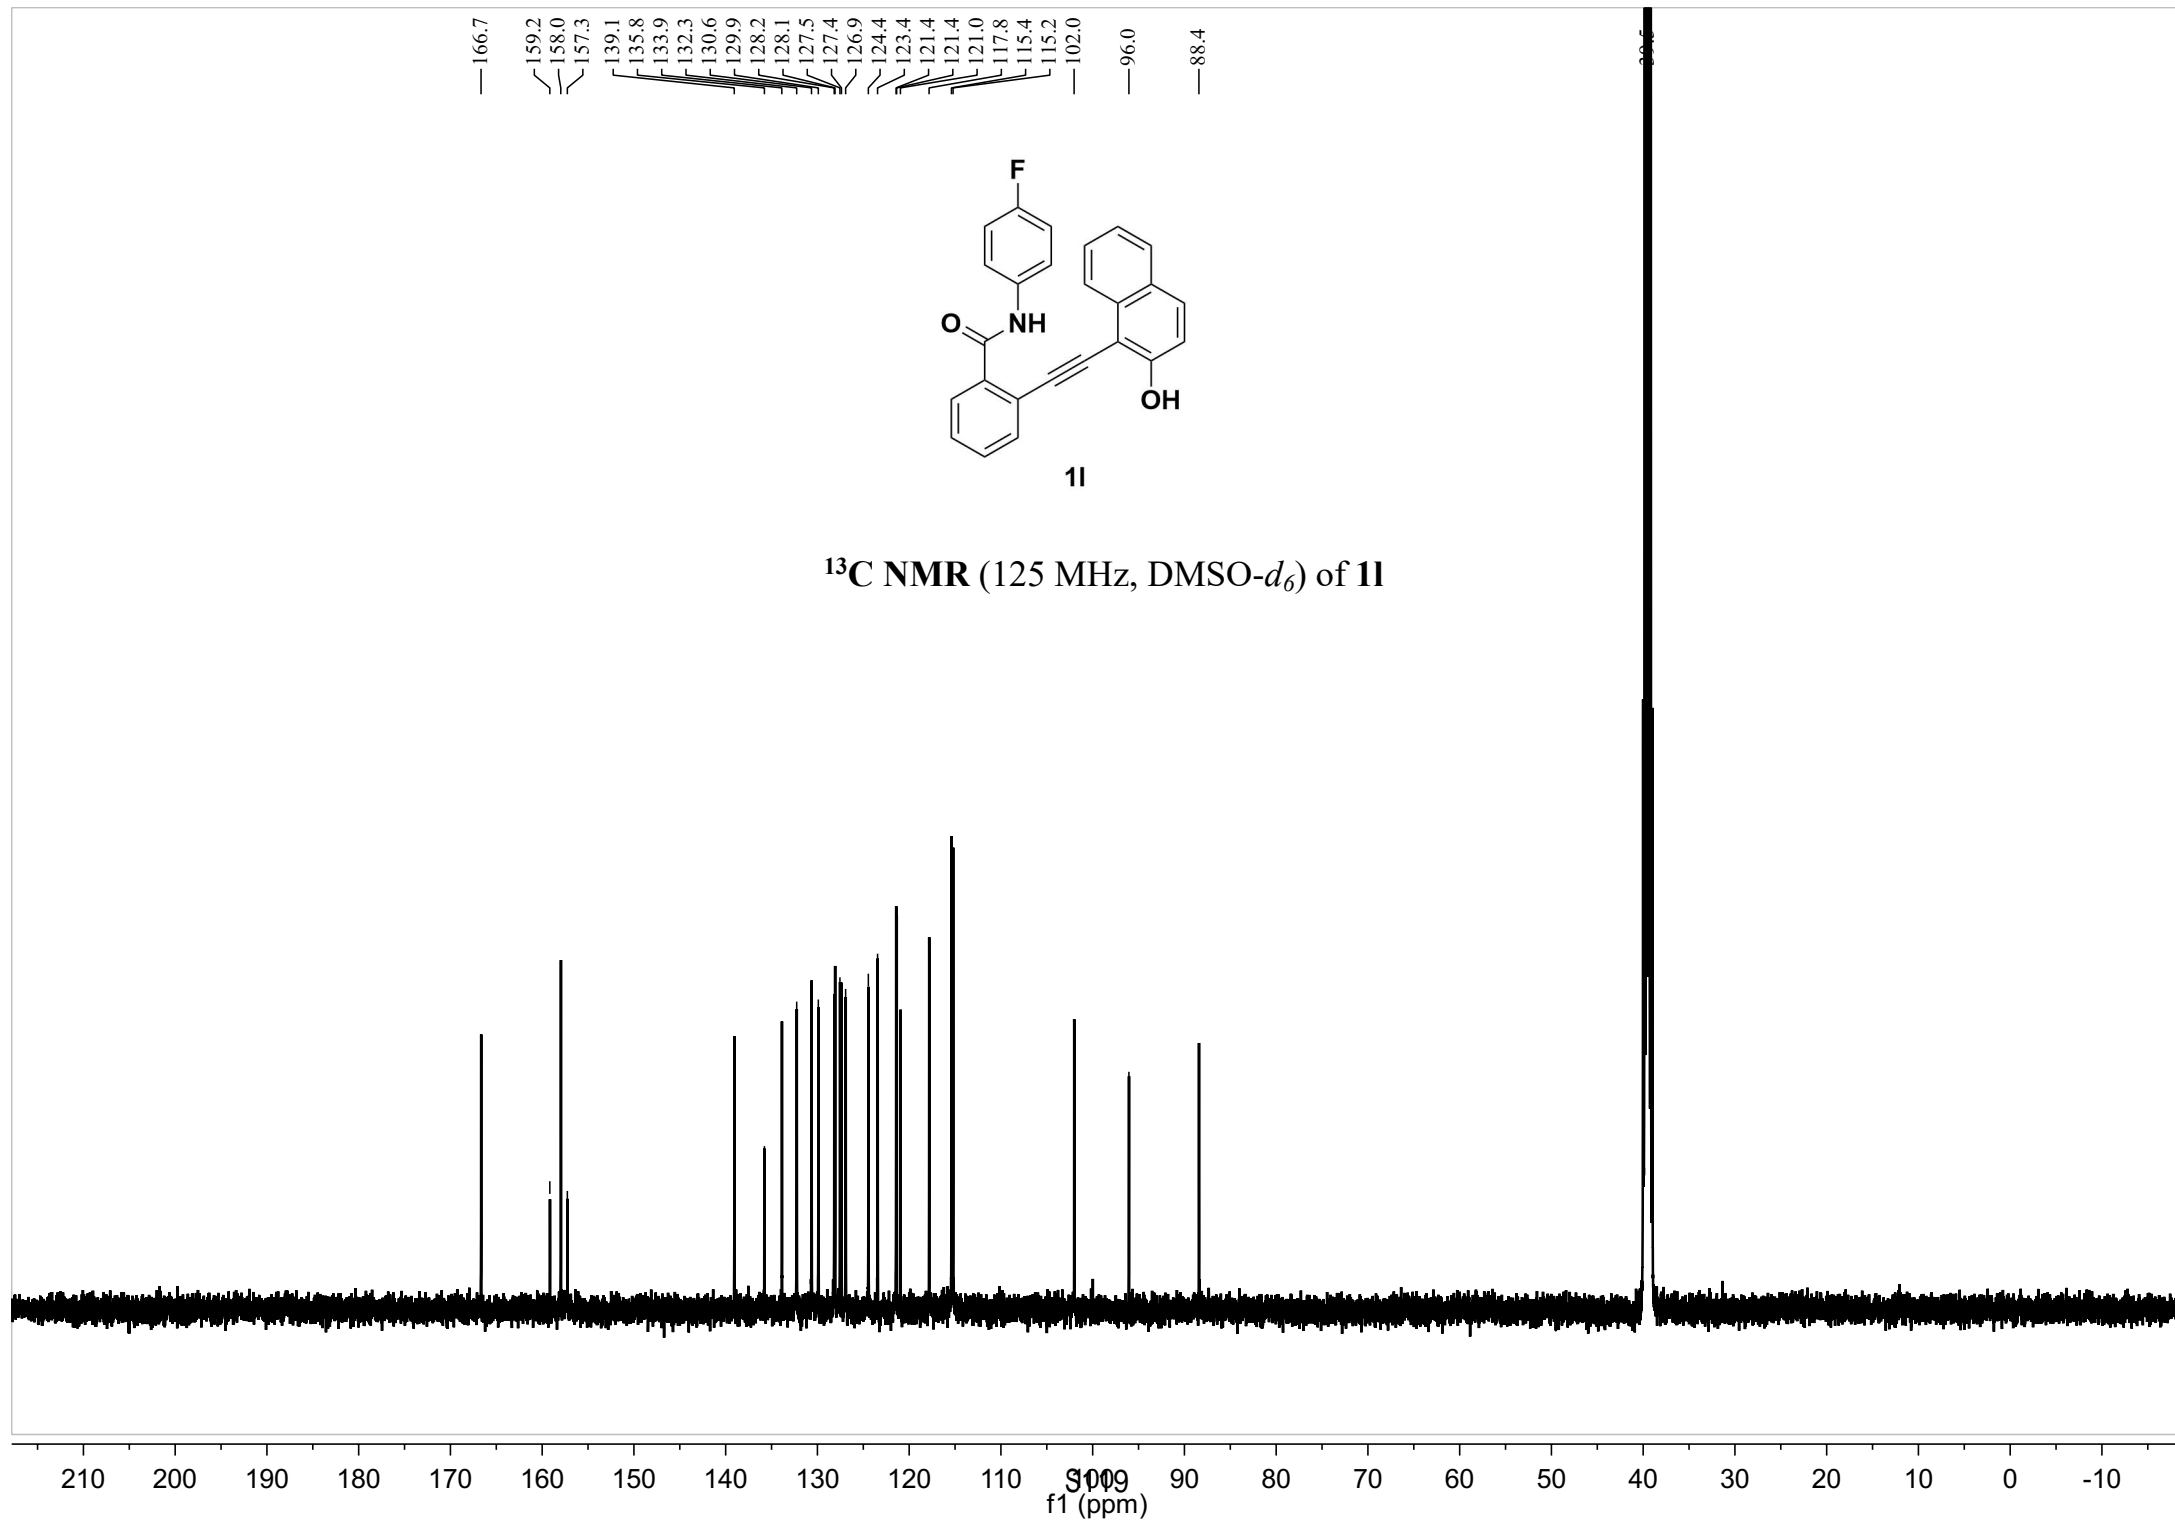

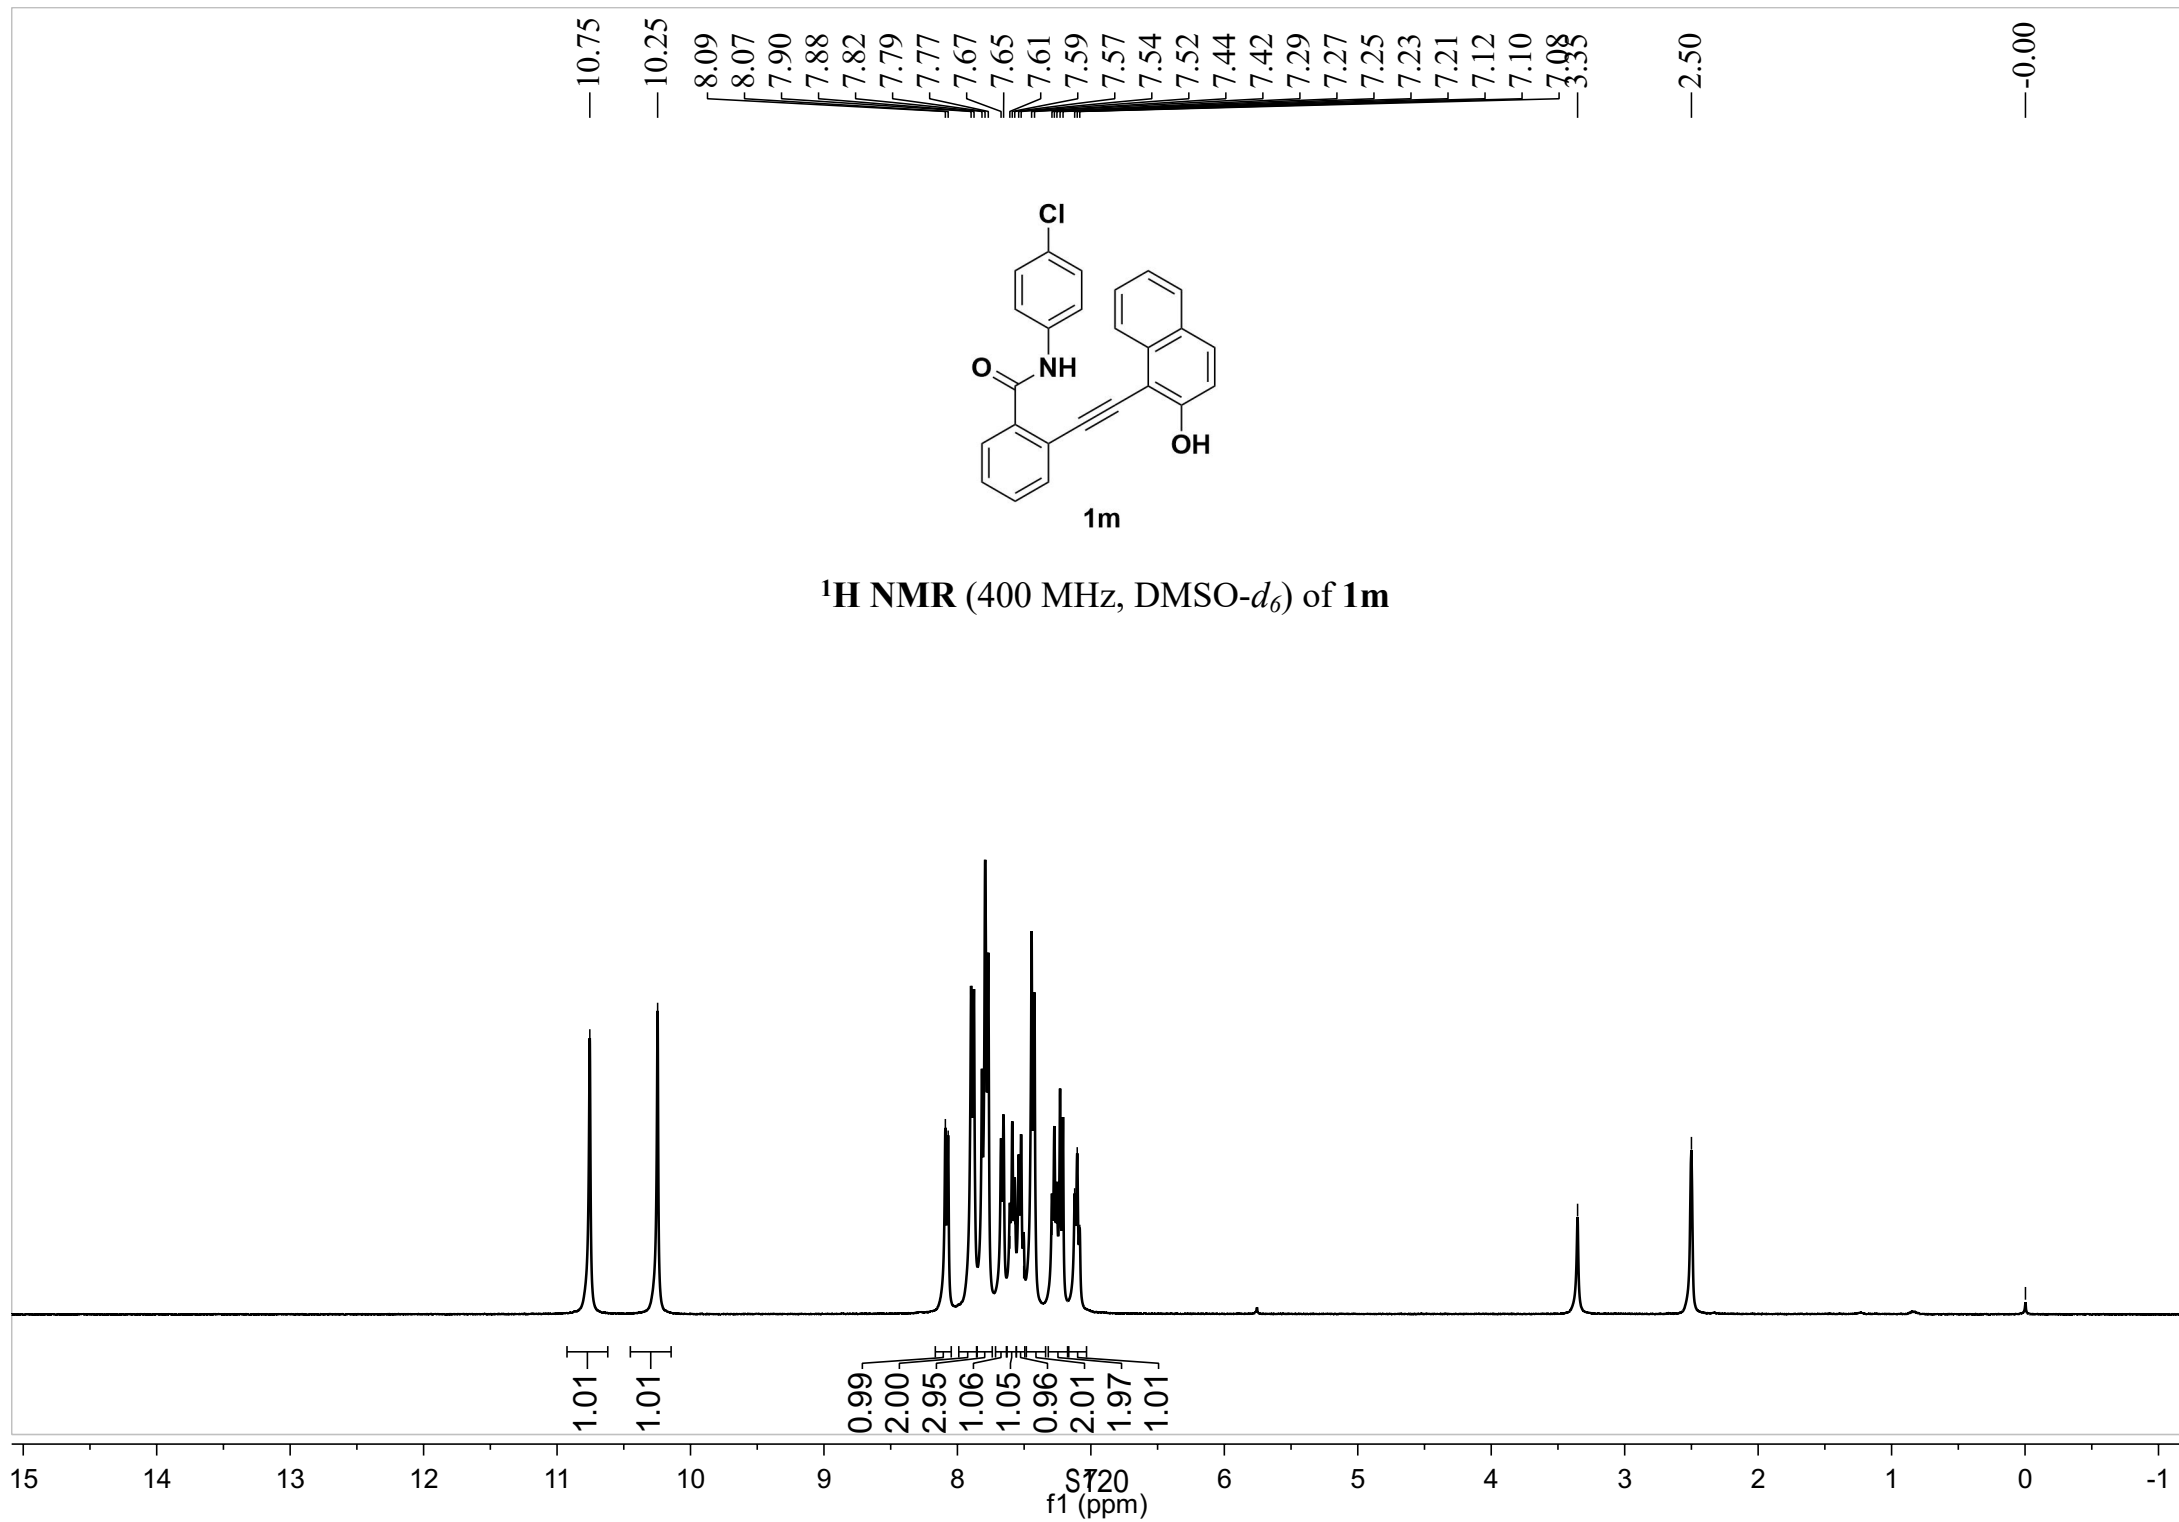



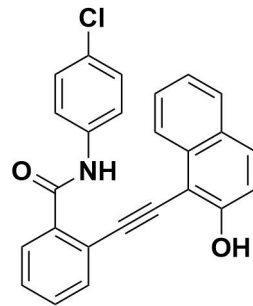

**1m**

**$^{13}\text{C}$  NMR (100 MHz, DMSO- $d_6$ ) of **1m****

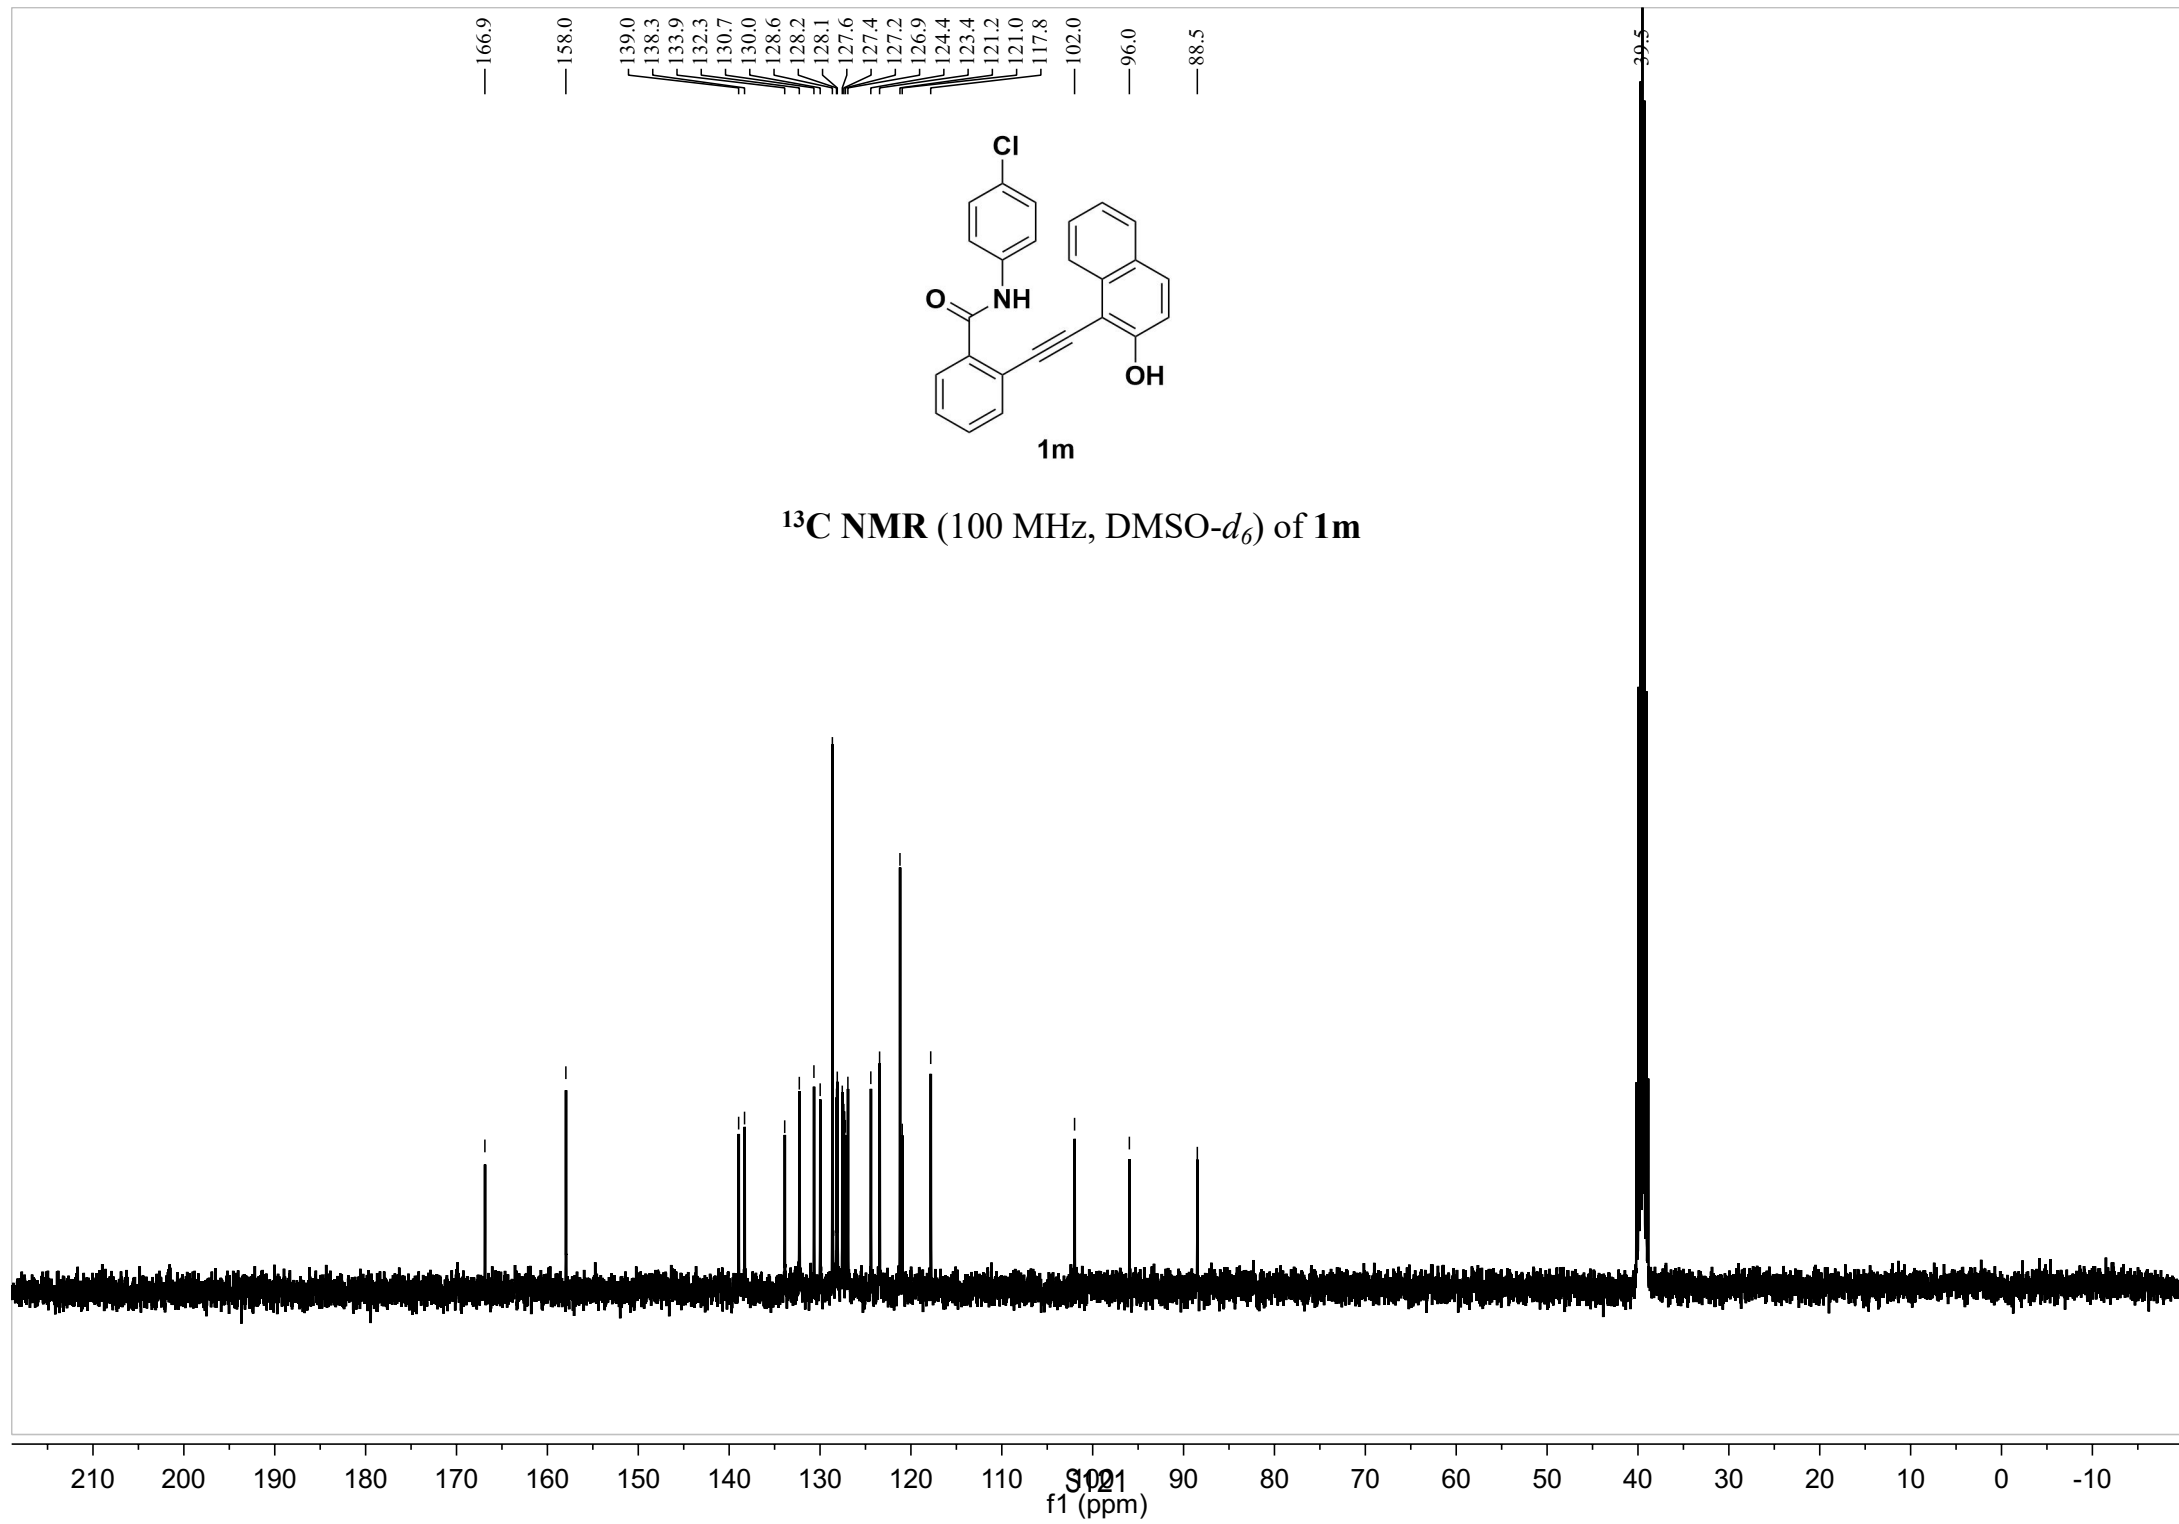

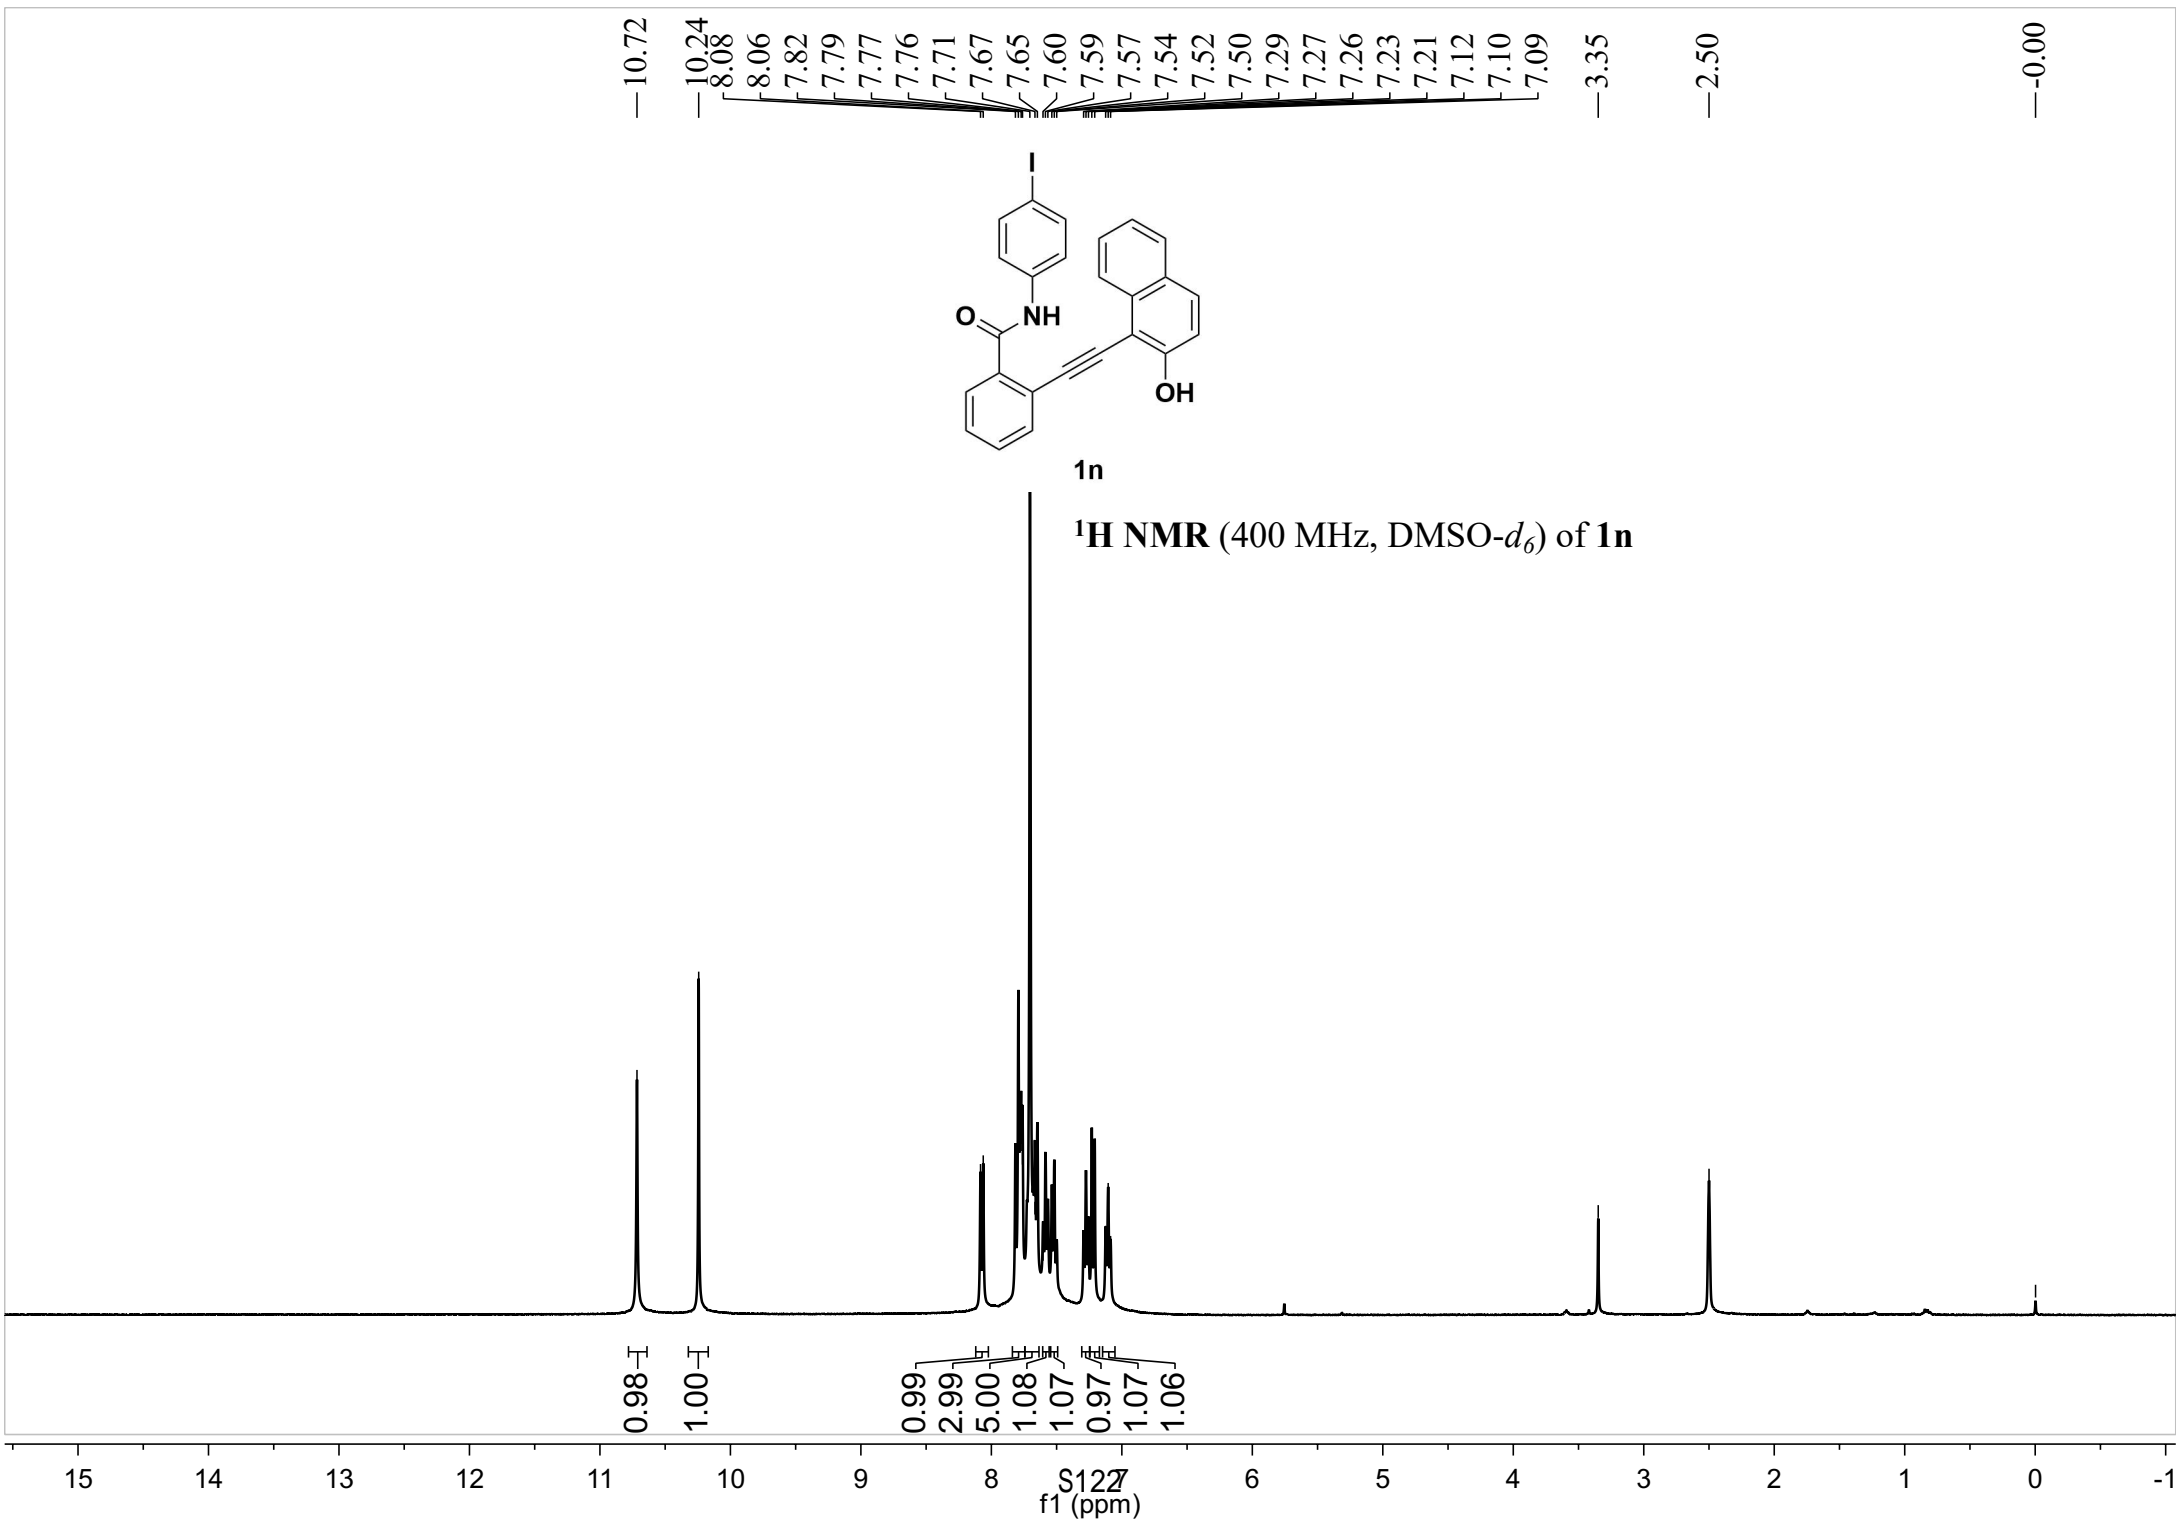

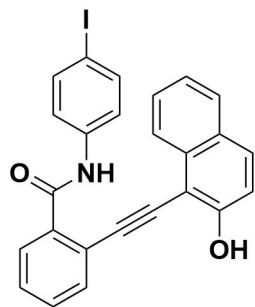

**1n**

$^{13}\text{C}$  NMR (100 MHz,  $\text{DMSO-}d_6$ ) of **1n**

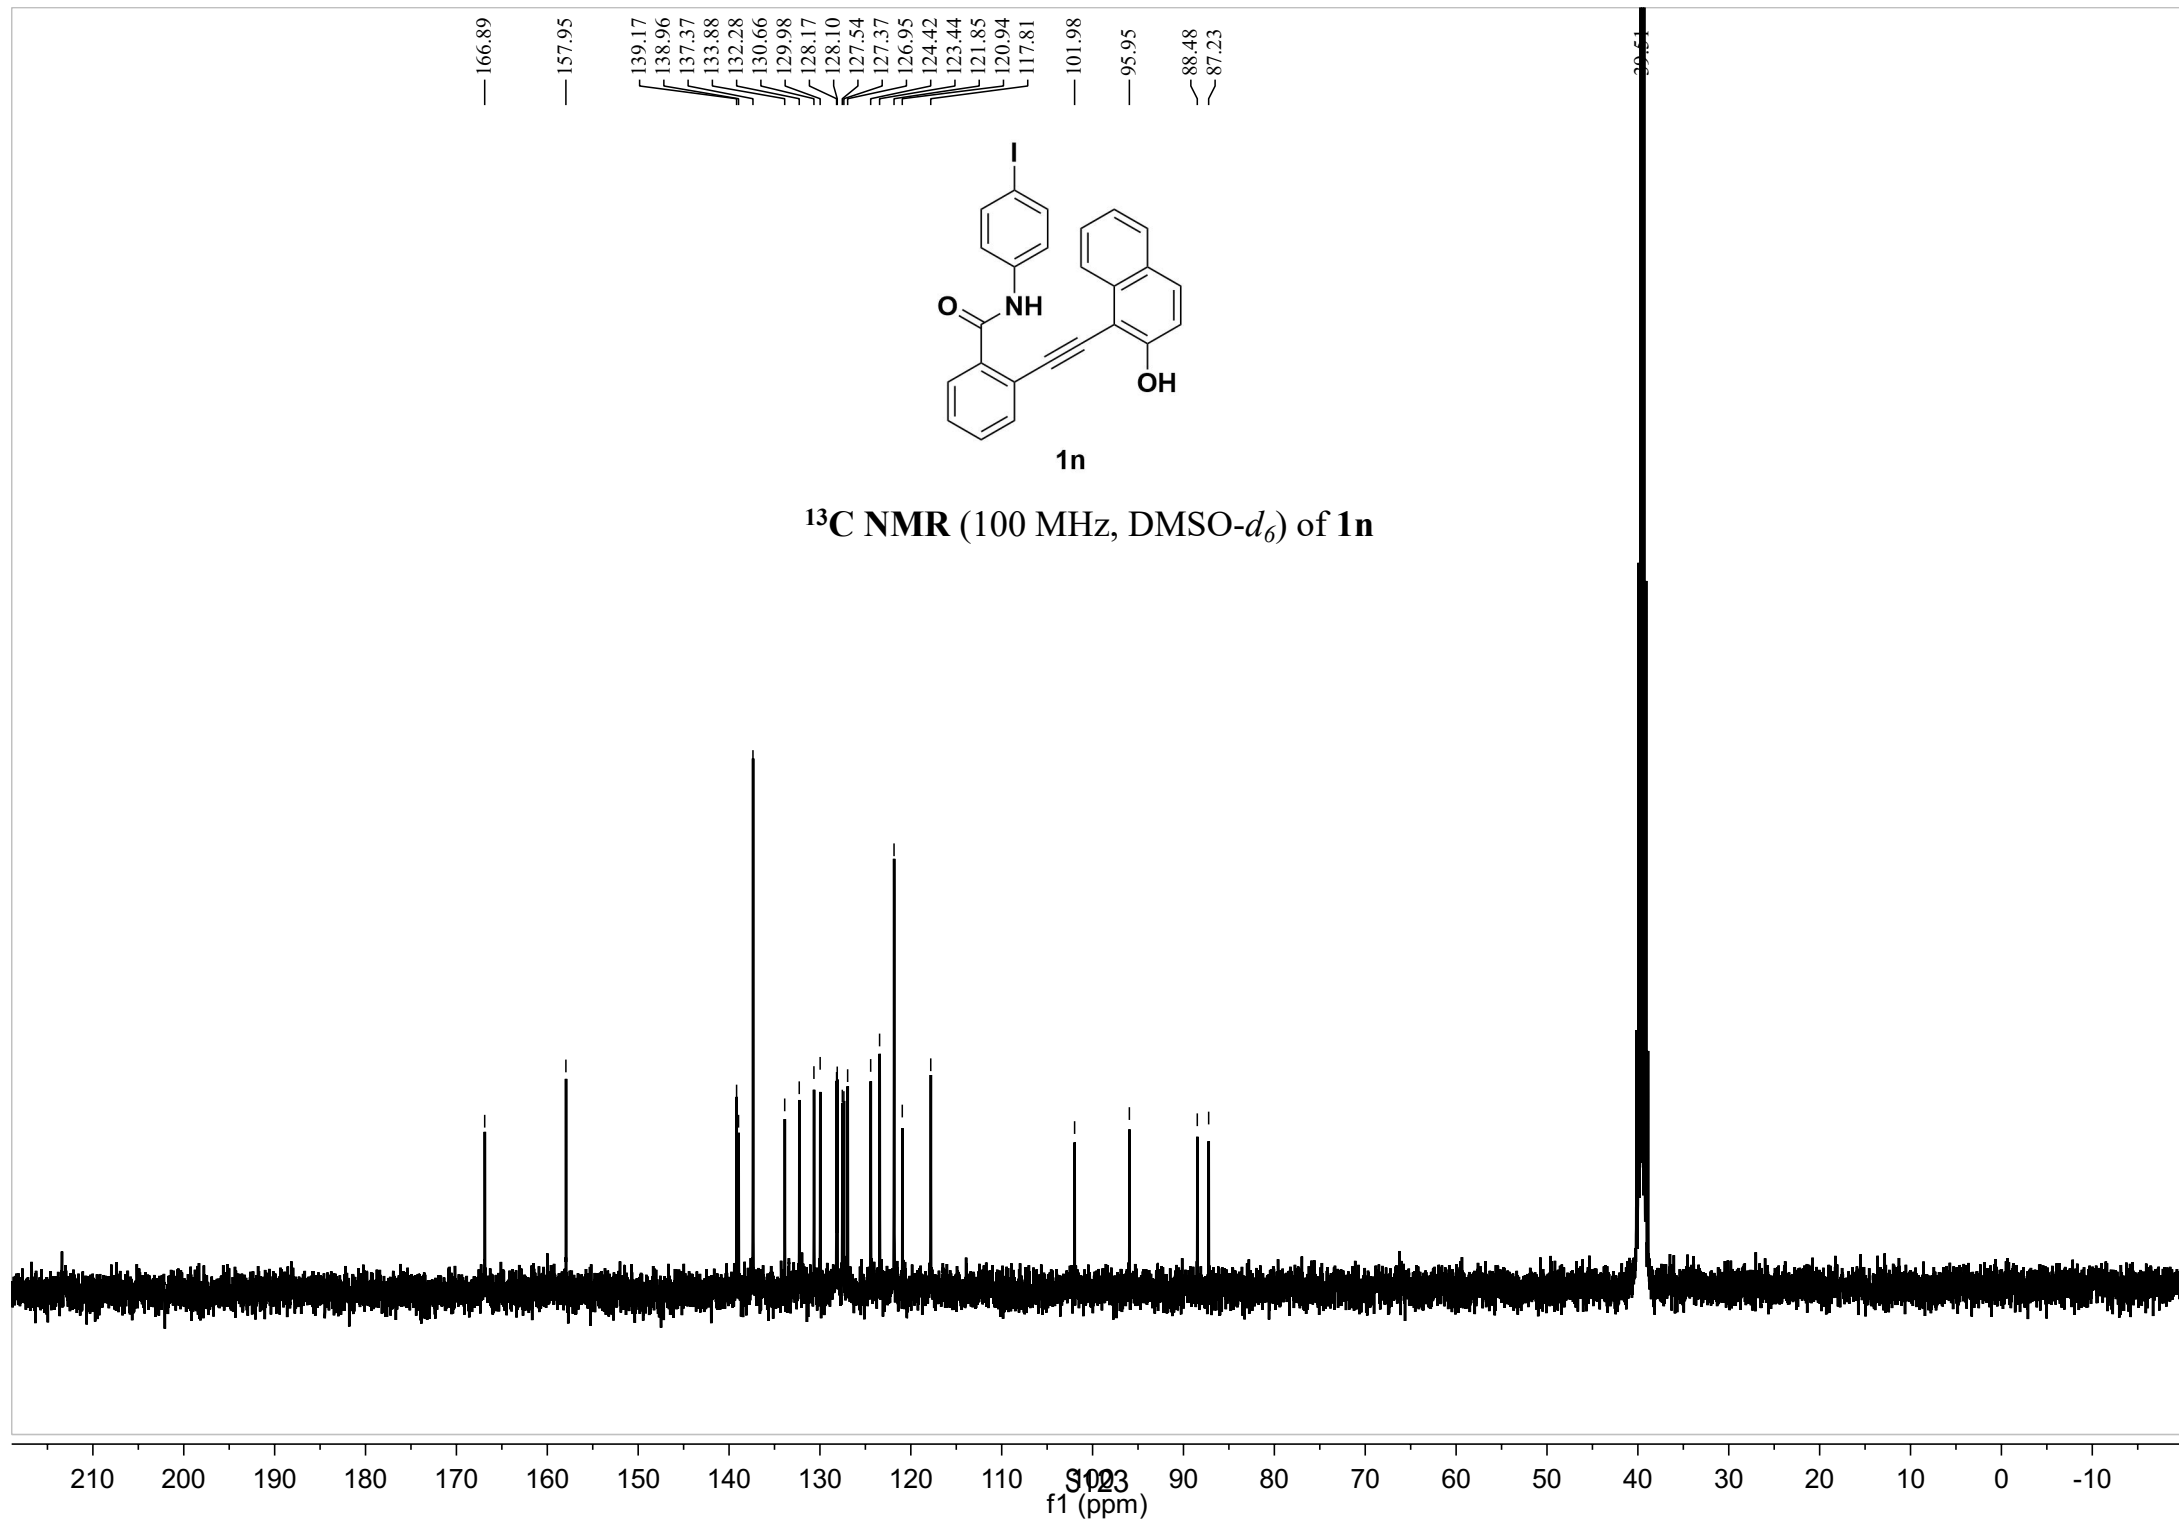

10.18  
10.07

8.21  
8.19  
7.85  
7.82  
7.81  
7.79  
7.78  
7.76  
7.61  
7.59  
7.57  
7.56  
7.54  
7.33  
7.31  
7.30  
7.28  
7.25  
7.23  
7.10  
3.98  
3.38

2.50  
2.23  
2.11

0.00

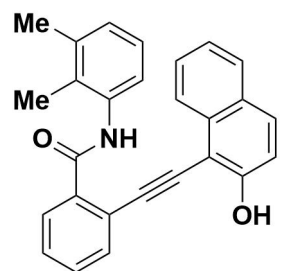

**1o**

<sup>1</sup>H NMR (400 MHz, DMSO-d<sub>6</sub>) of **1o**

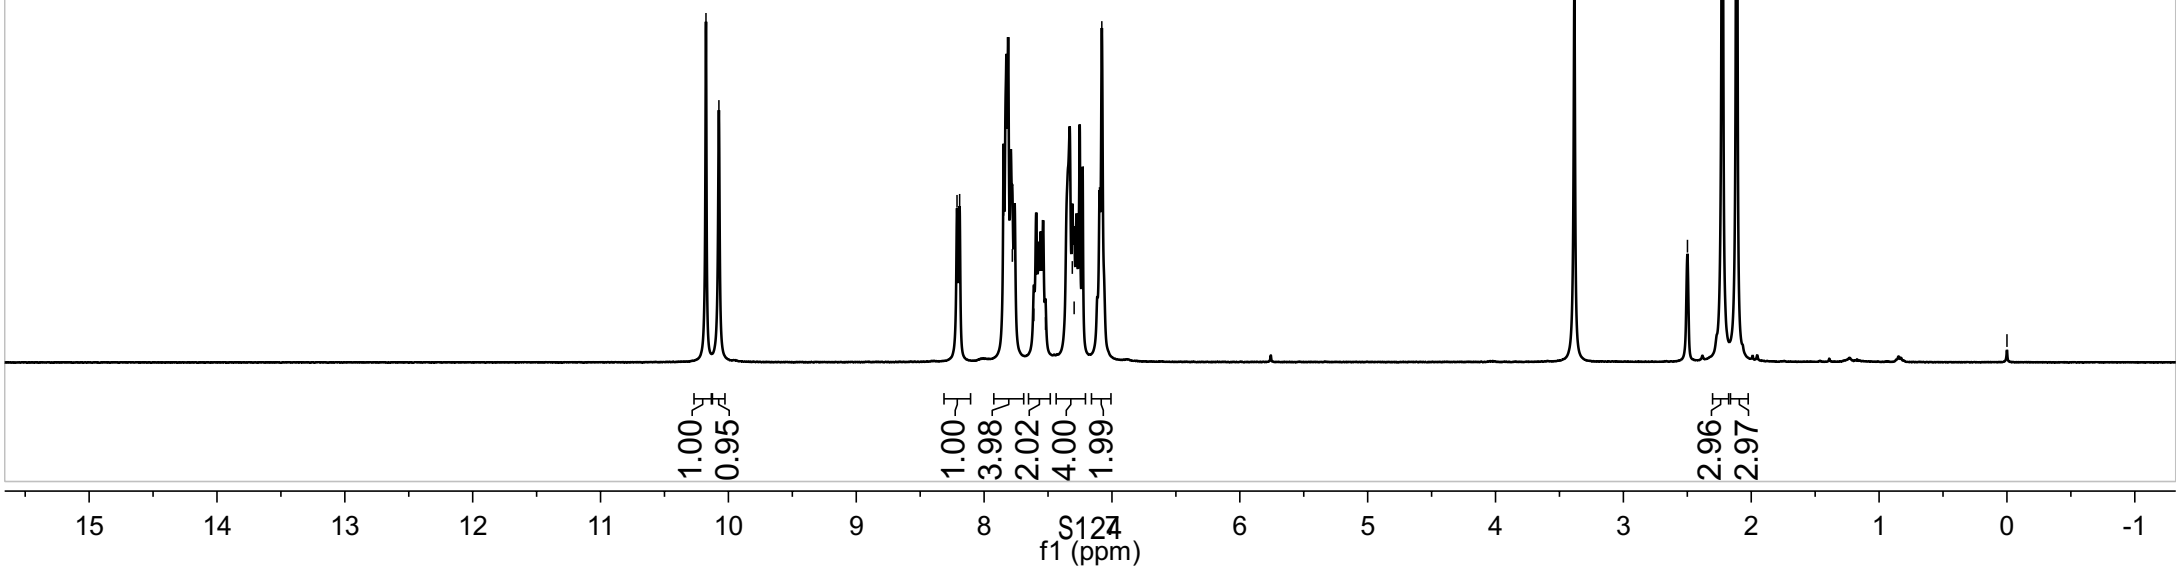

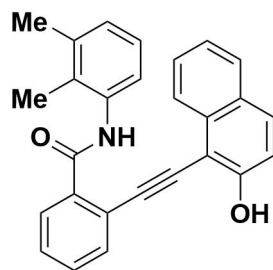

**1o**

$^{13}\text{C}$  NMR (100 MHz,  $\text{DMSO-}d_6$ ) of **1o**

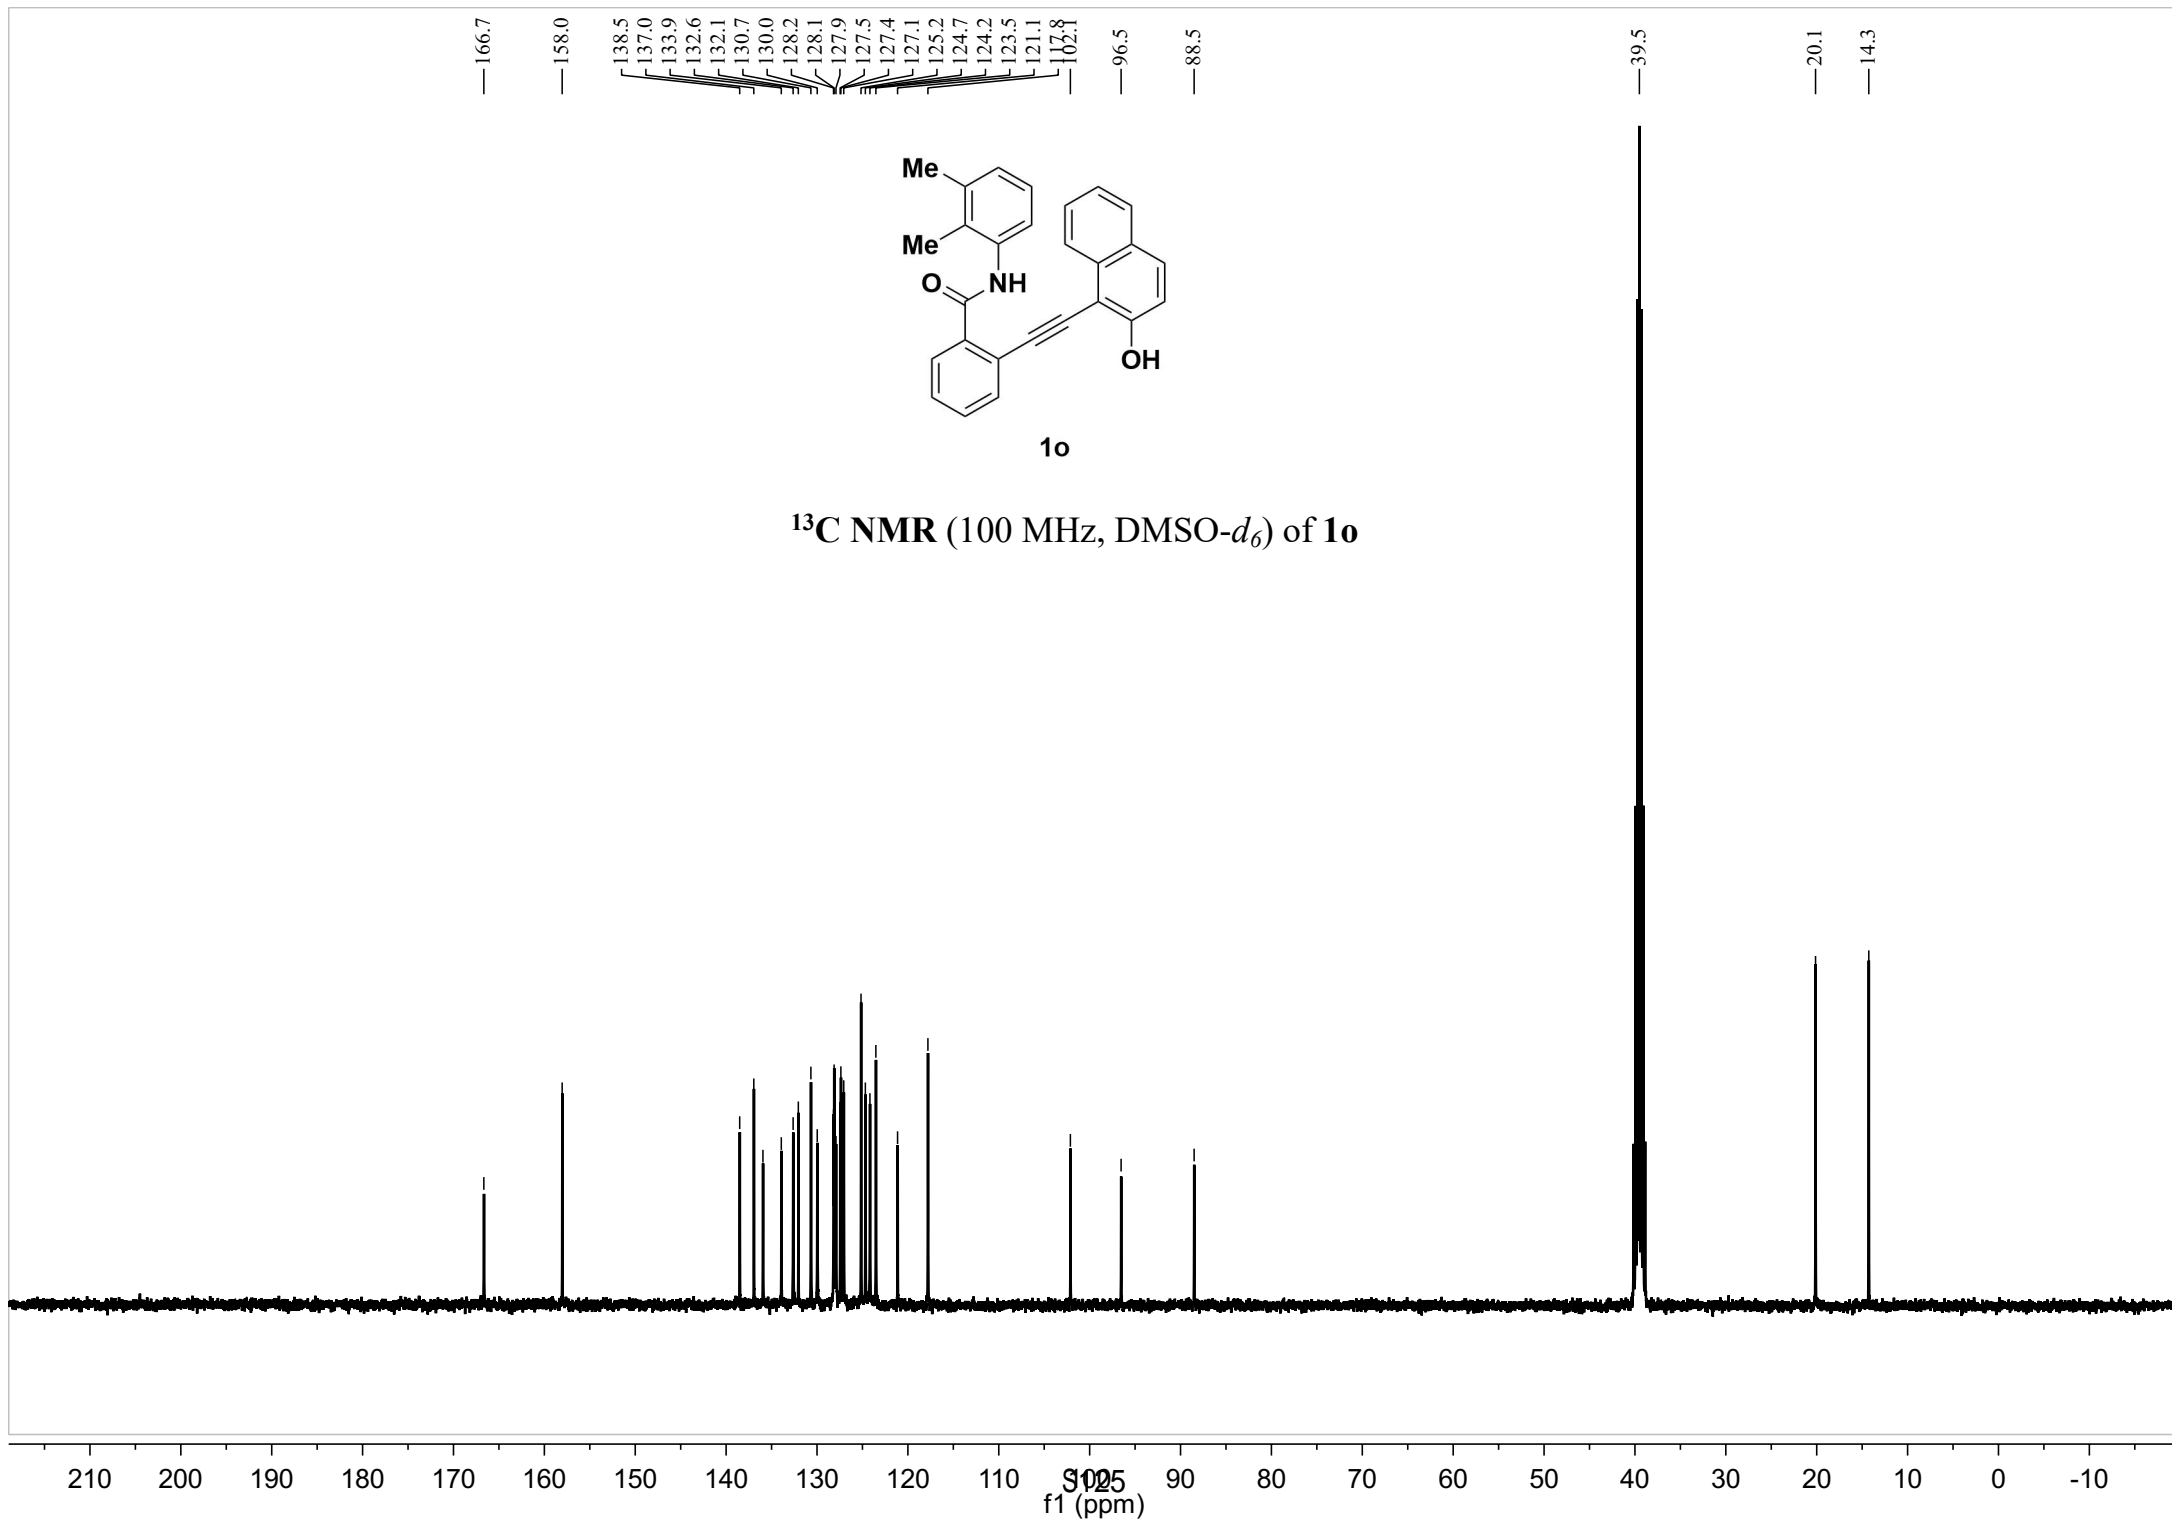

~10.43  
~10.21  
8.18  
8.16  
7.82  
7.80  
7.77  
7.76  
7.66  
7.64  
7.63  
7.59  
7.57  
7.55  
7.53  
7.51  
7.49  
7.30  
7.28  
7.26  
7.24  
7.22  
7.15  
7.13  
7.11  
7.09  
— 3.37  
— 2.50  
— 2.19  
— 0.00

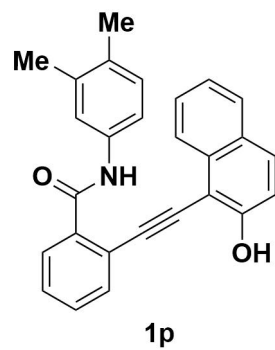

**<sup>1</sup>H NMR (400 MHz, DMSO-*d*<sub>6</sub>) of 1p**

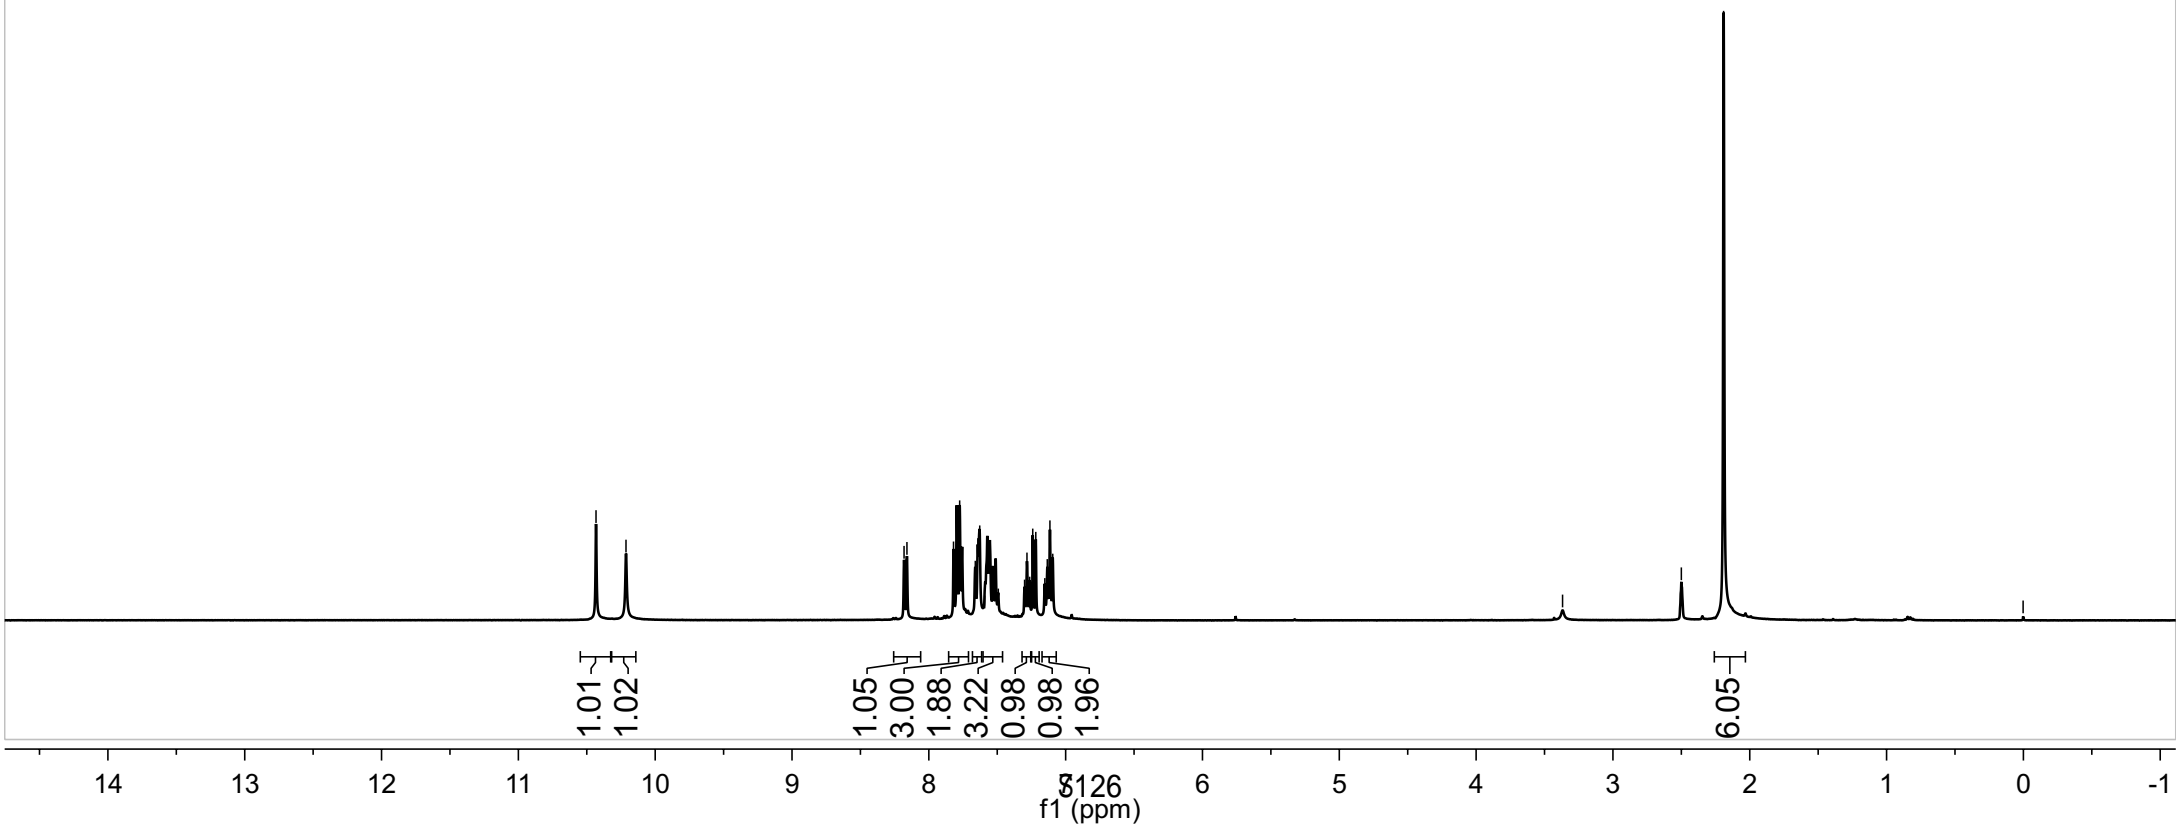

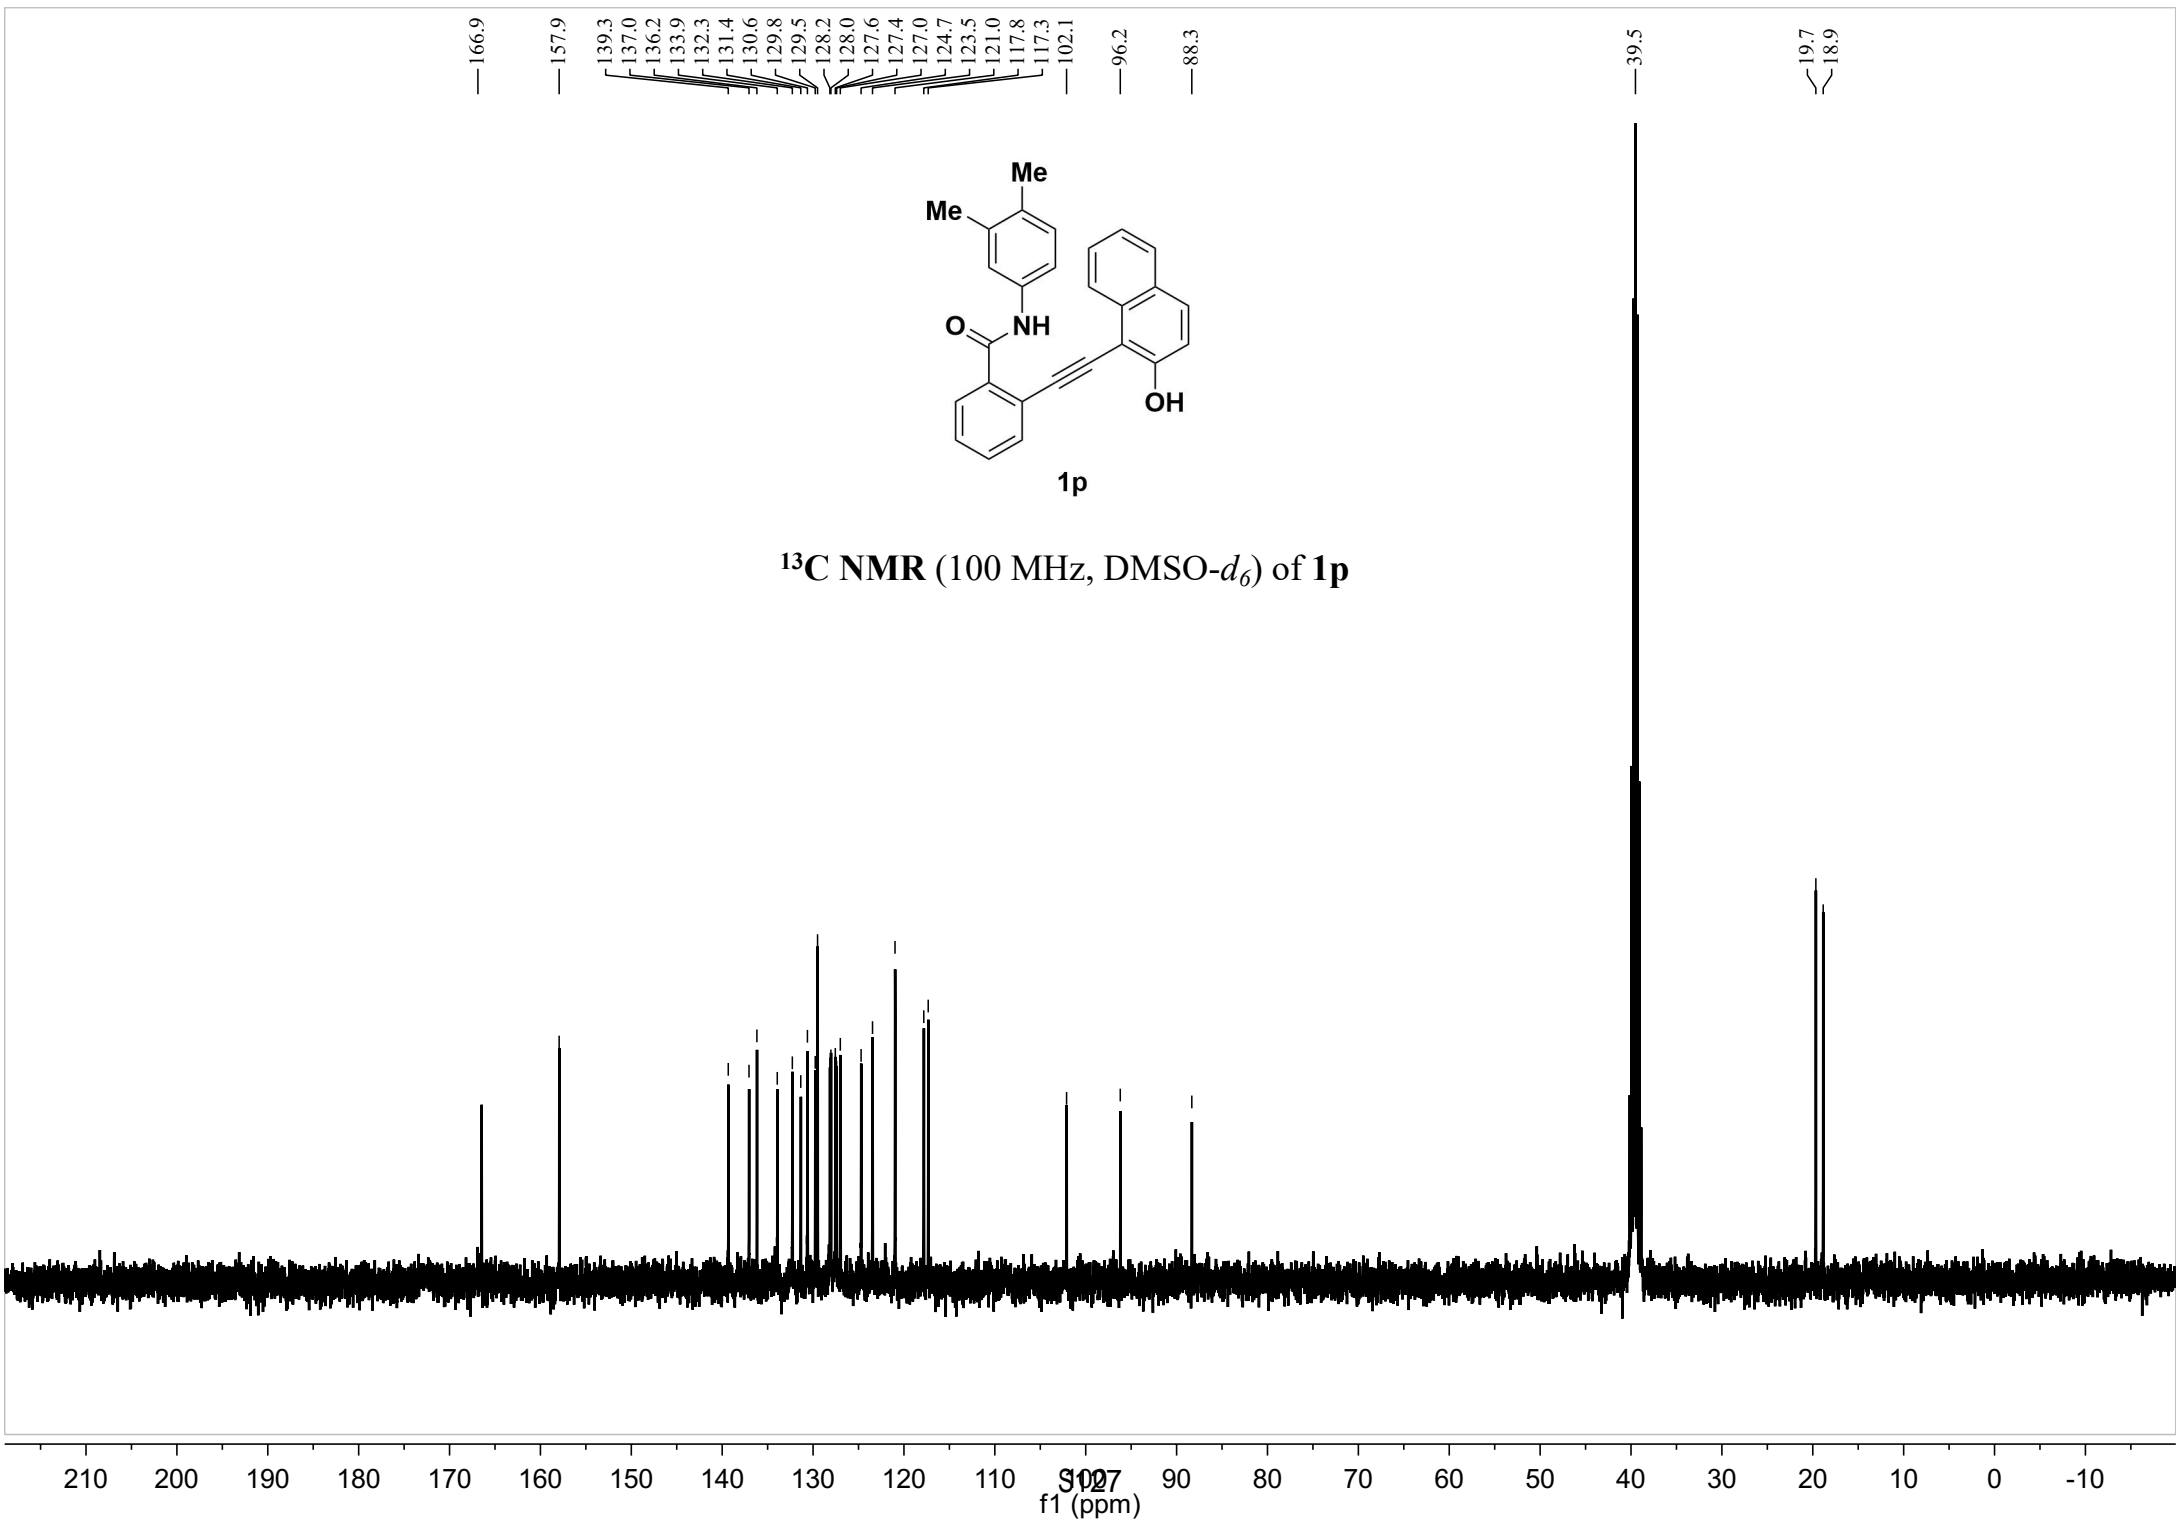

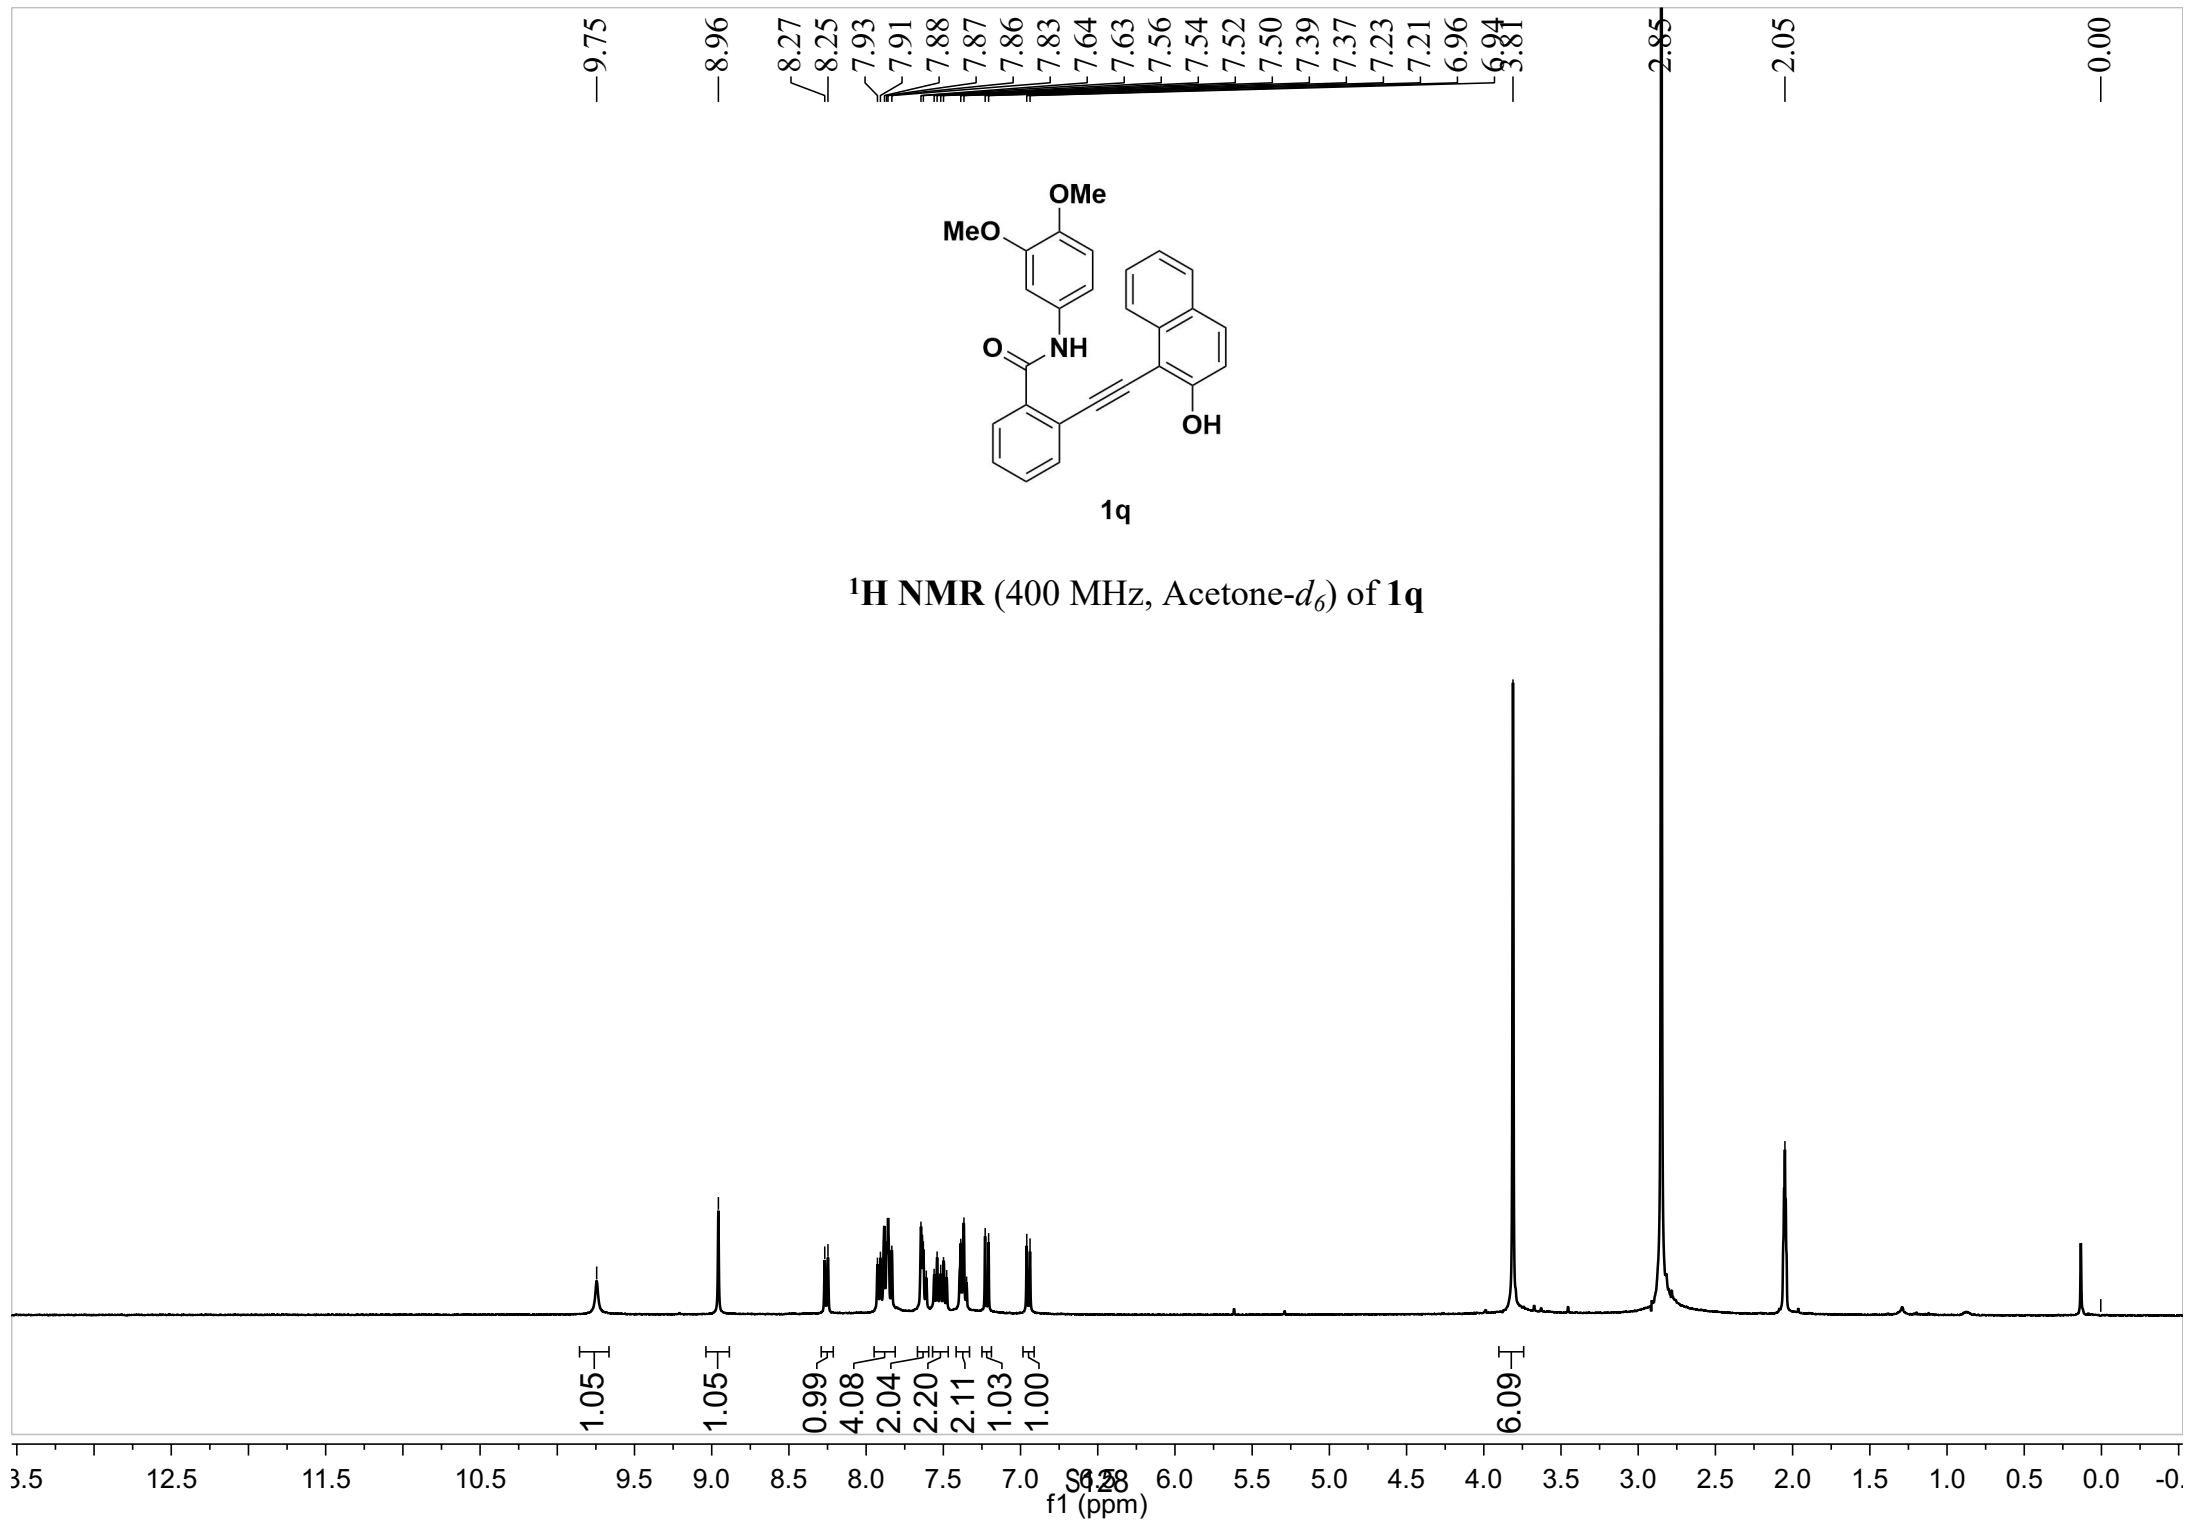



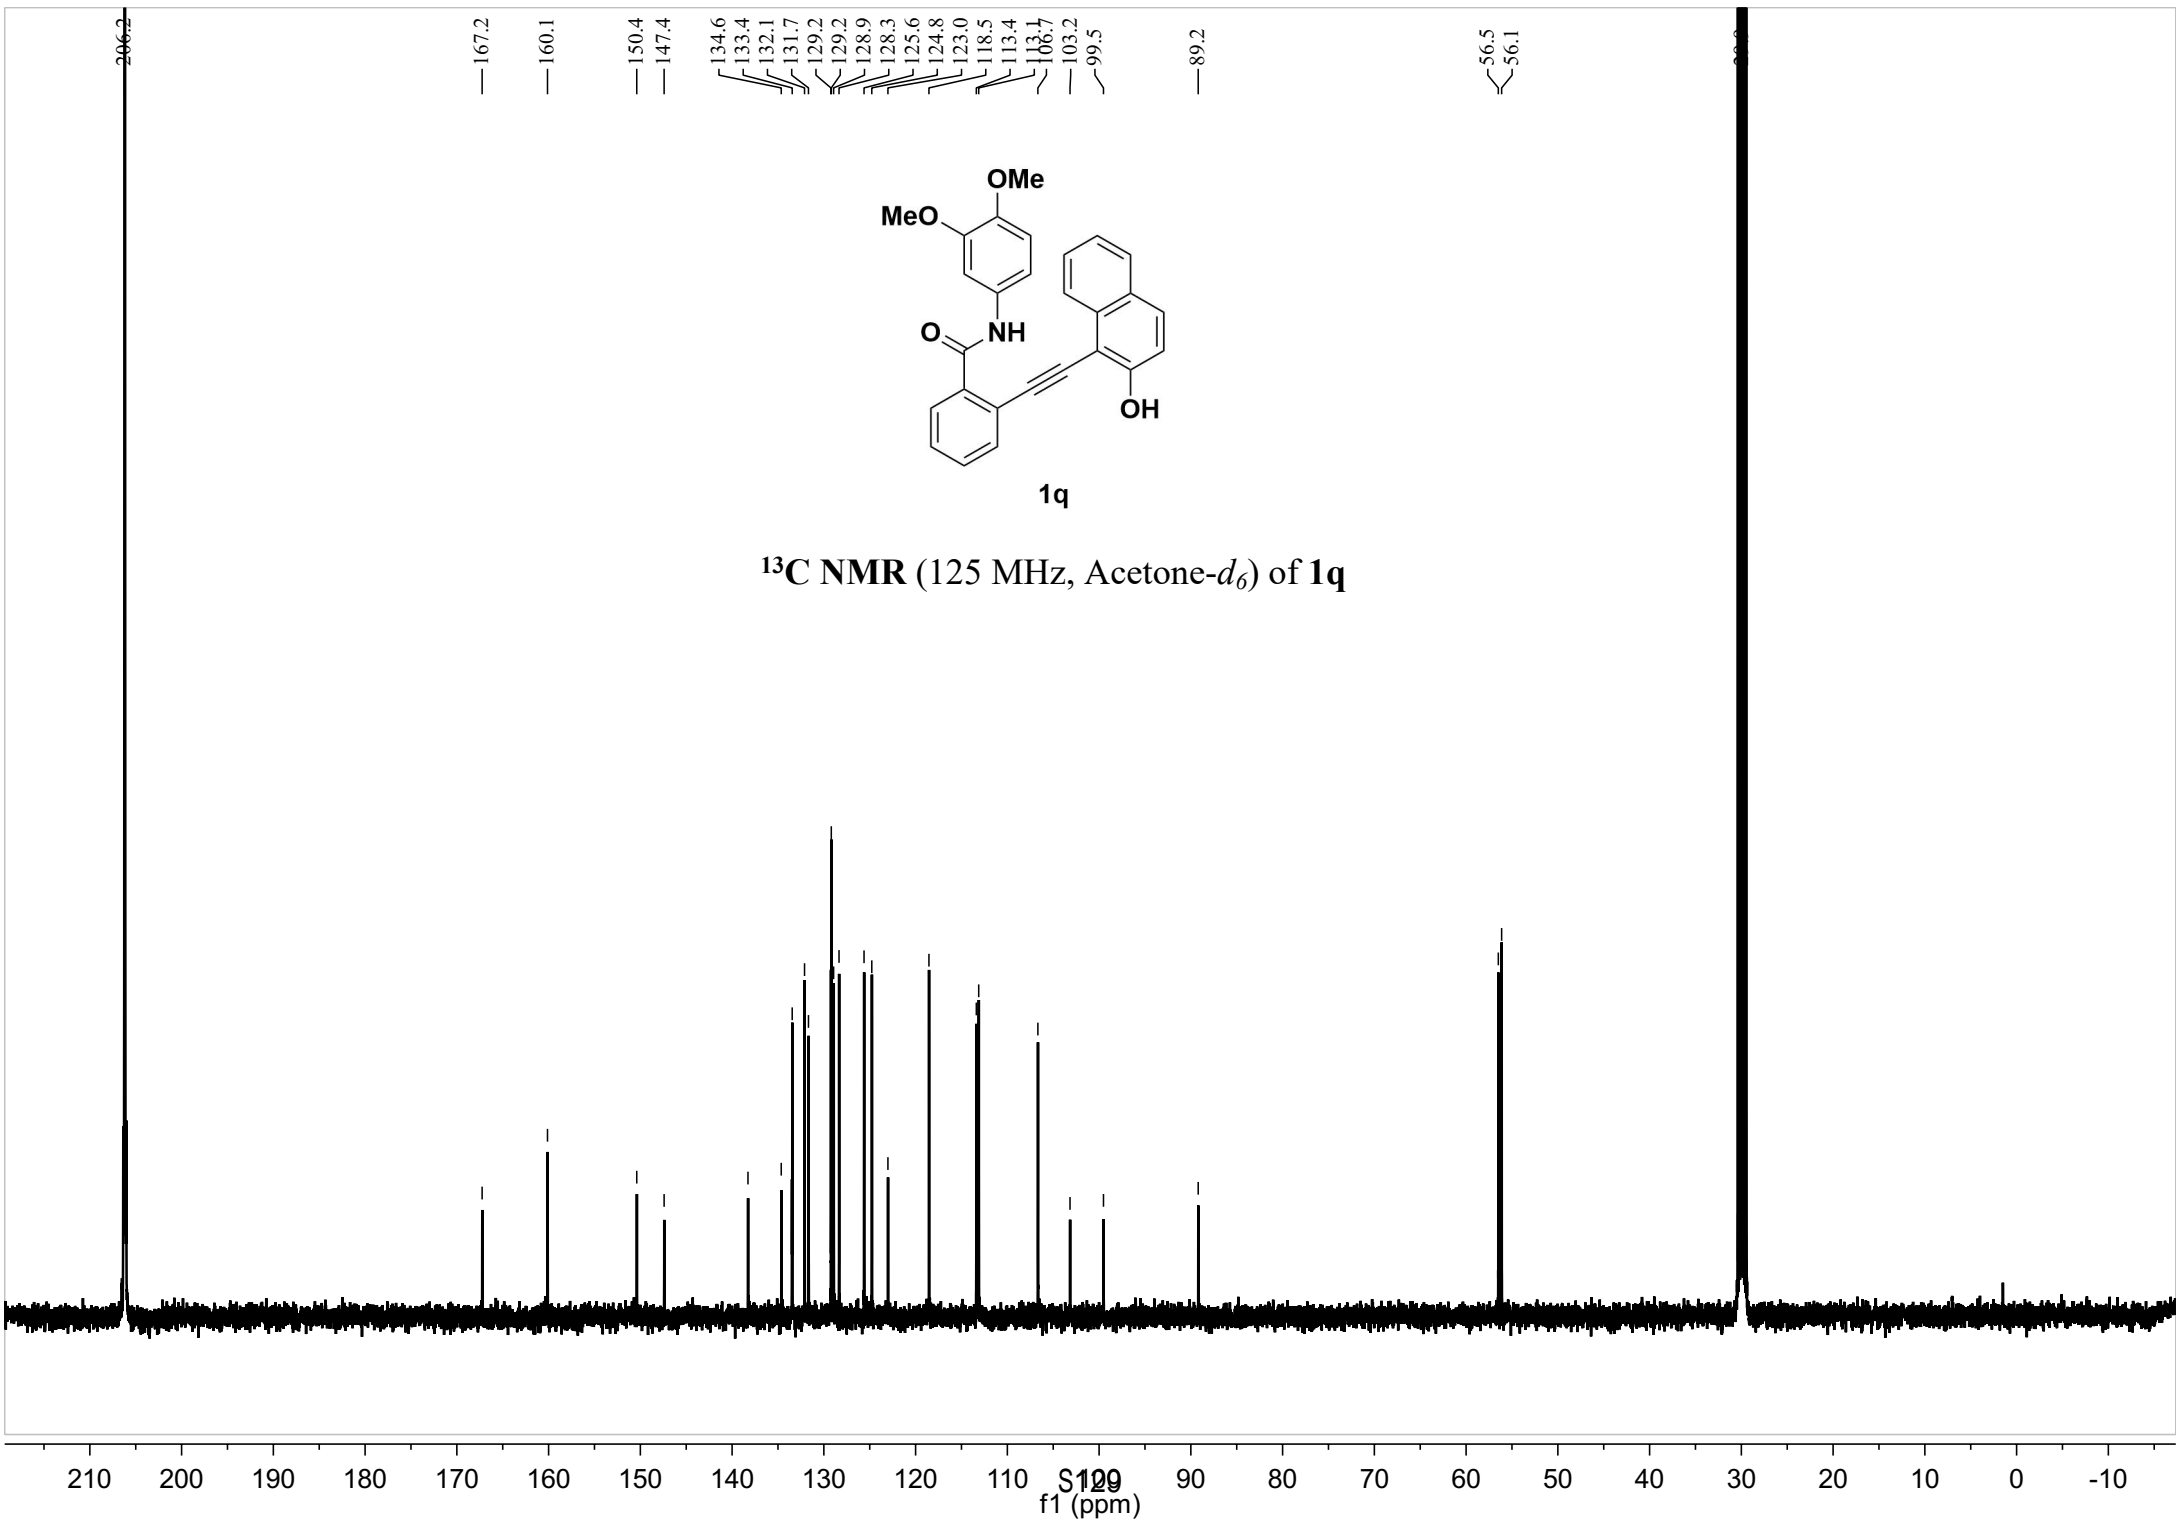

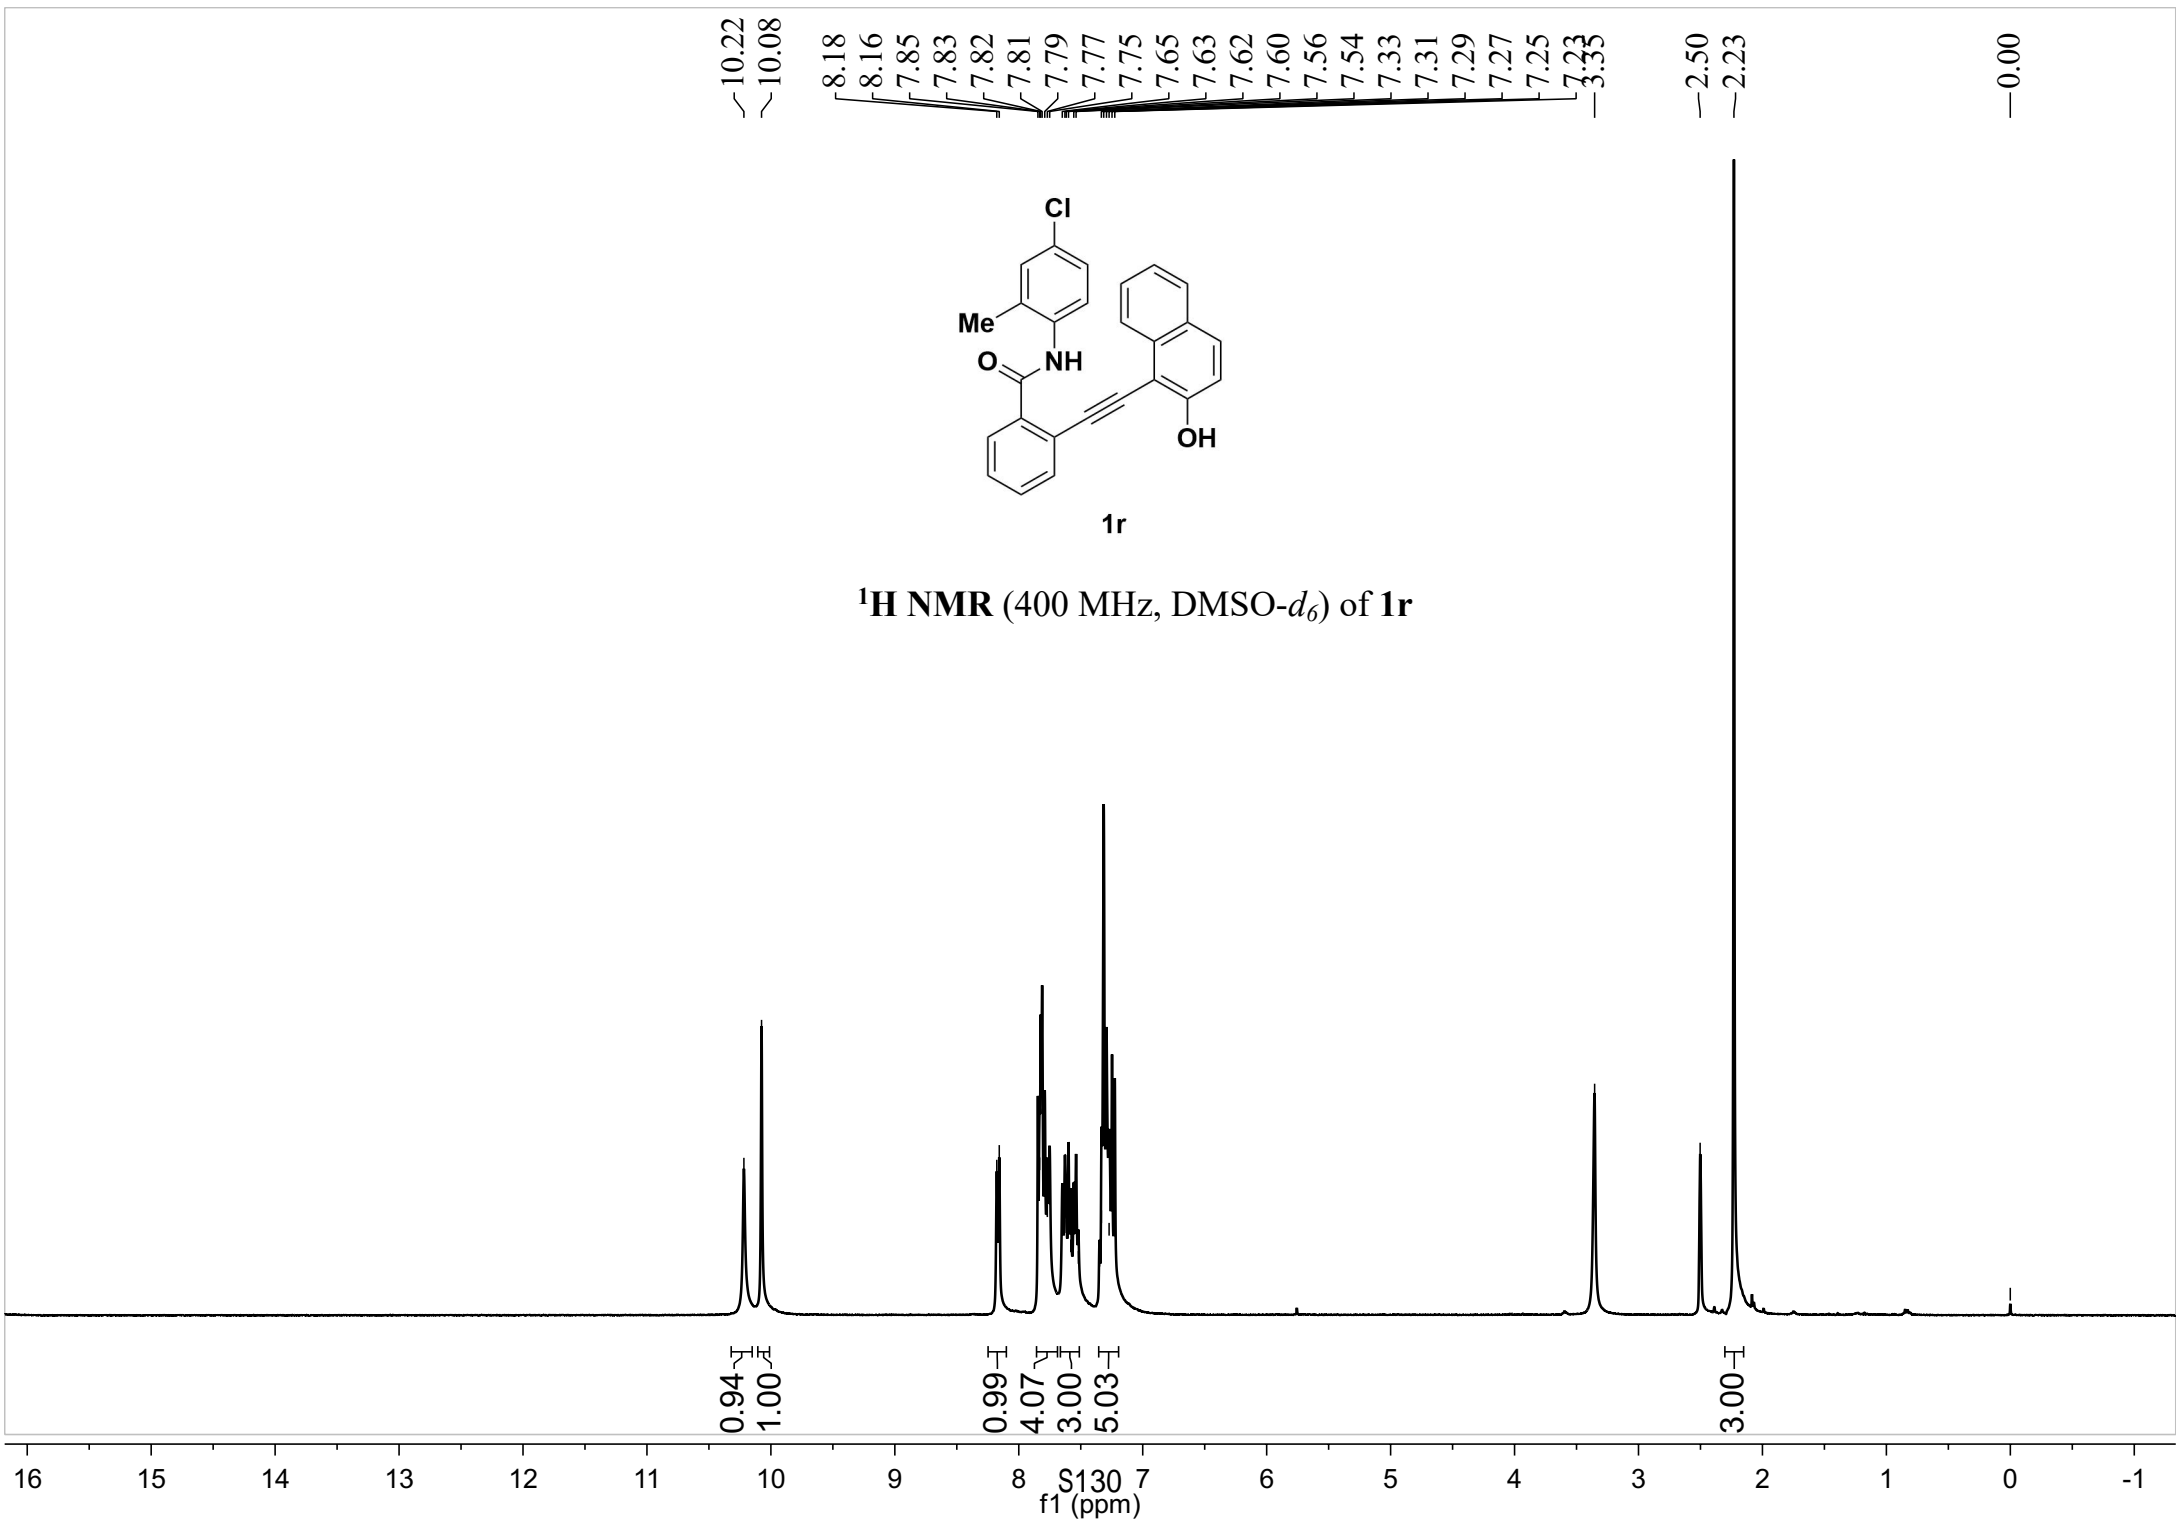

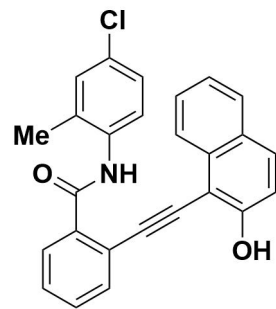

1r

$^{13}\text{C}$  NMR (100 MHz,  $\text{DMSO-}d_6$ ) of 1r

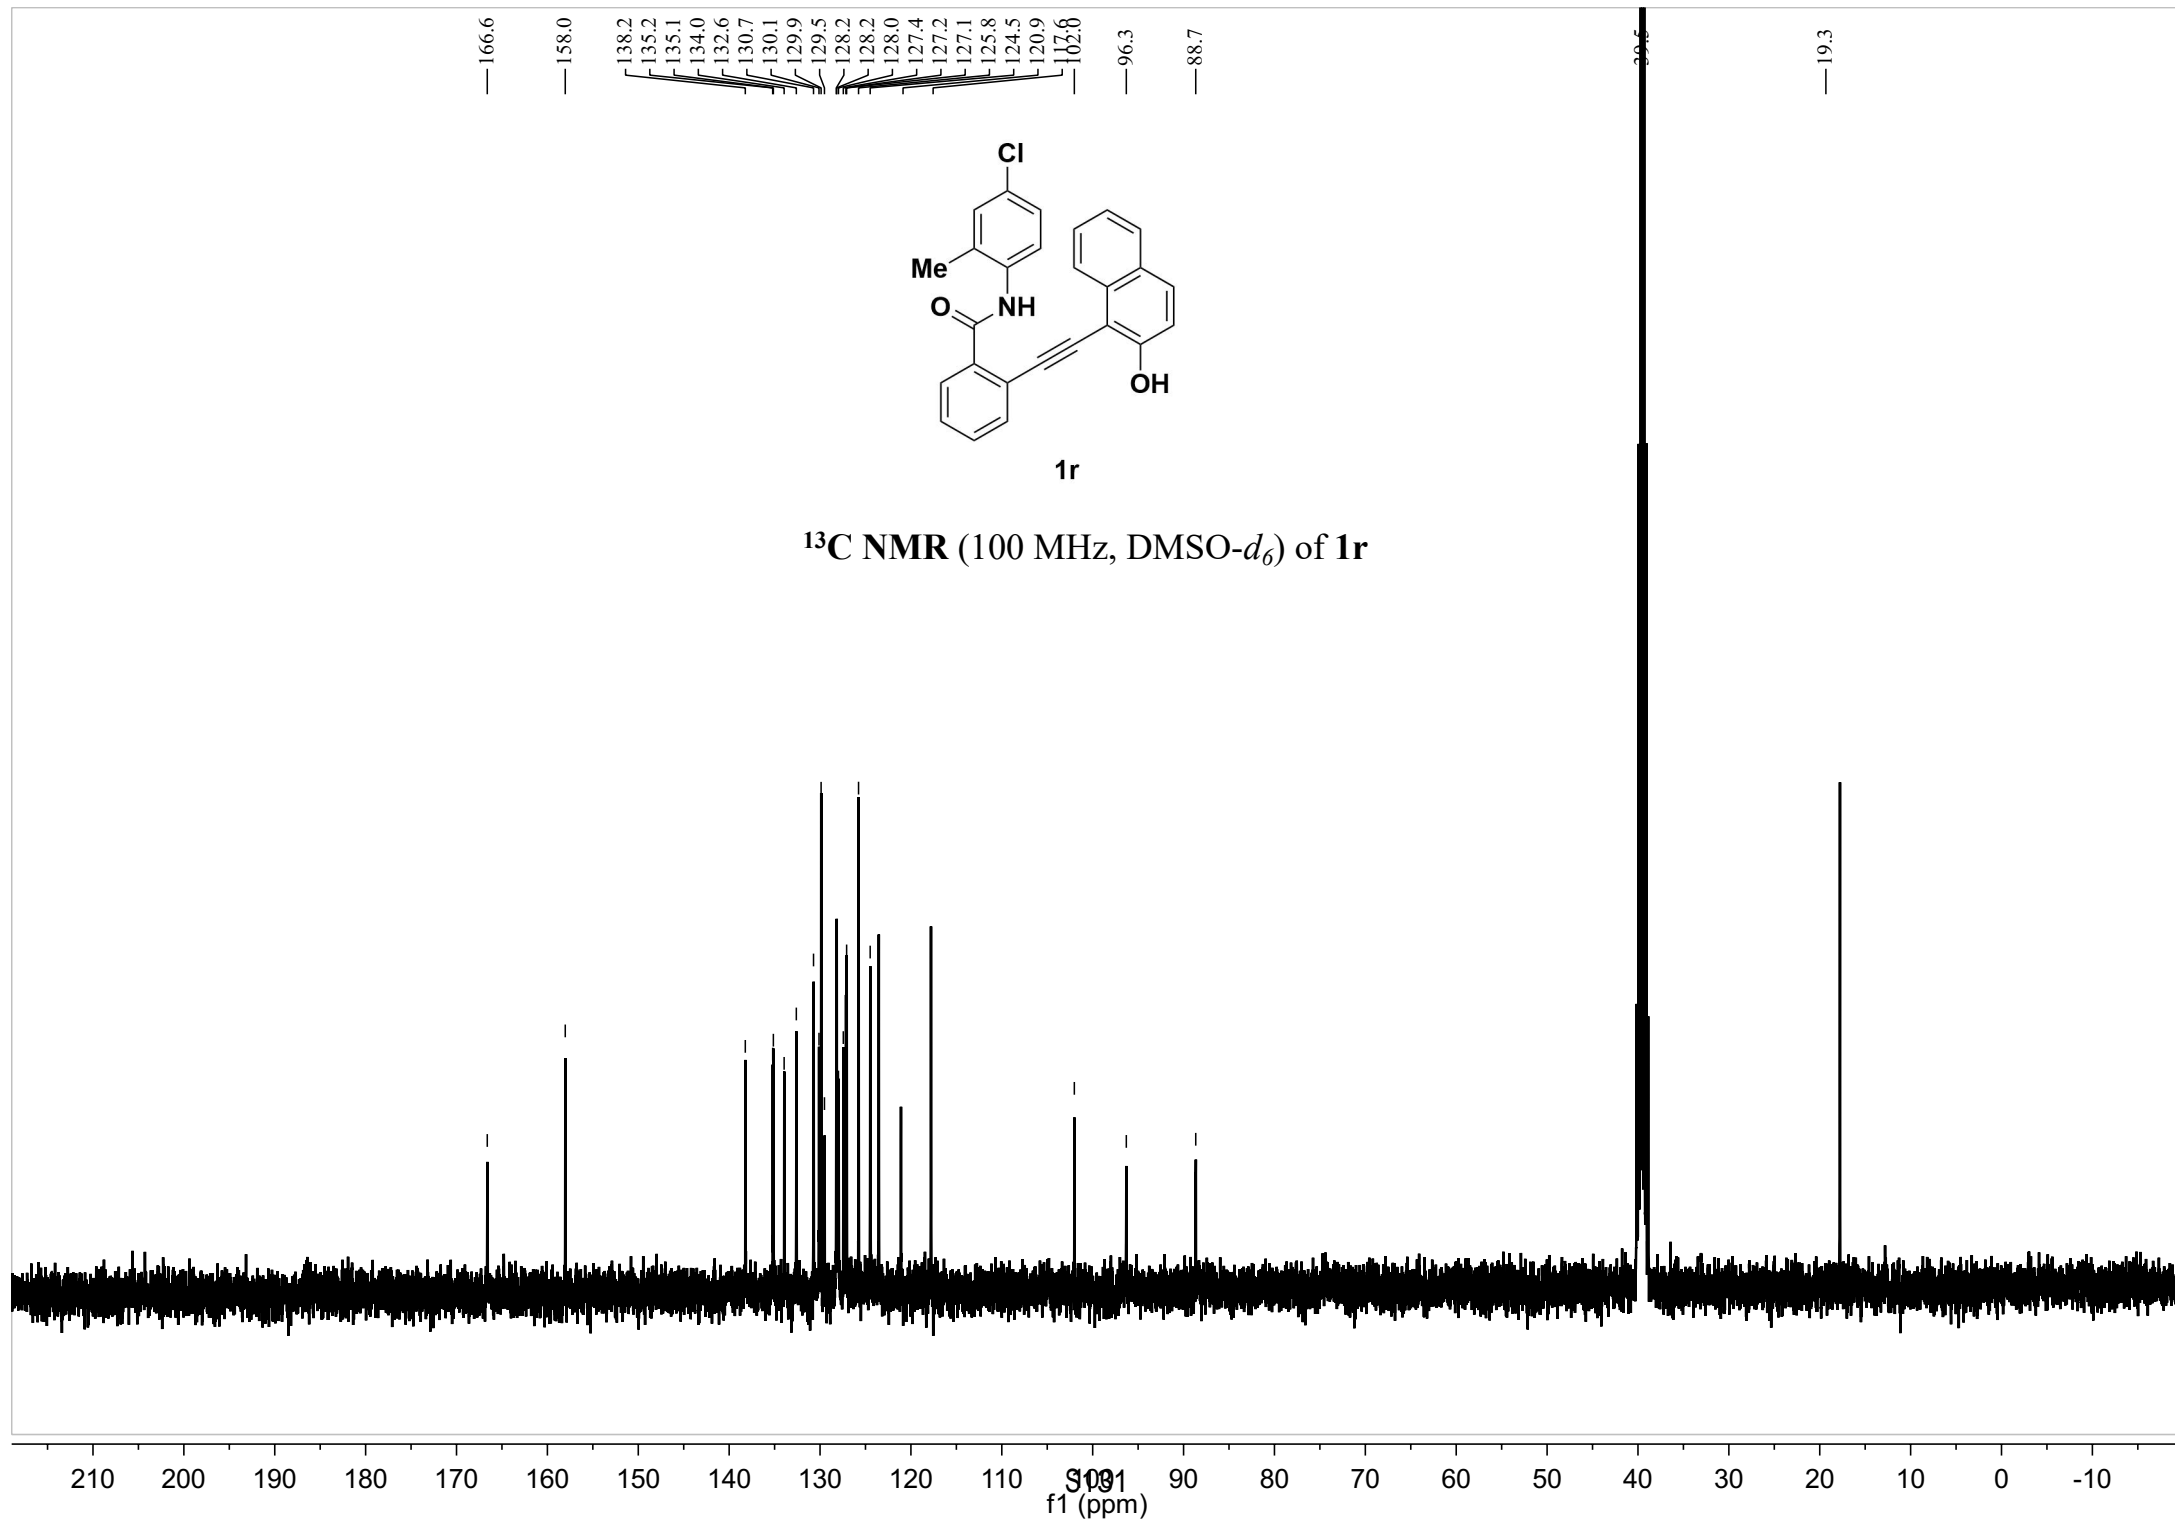

9.99  
9.80  
8.22  
8.21  
7.84  
7.82  
7.80  
7.62  
7.60  
7.58  
7.57  
7.55  
7.54  
7.40  
7.38  
7.37  
7.36  
7.33  
7.33  
7.22  
7.21  
6.93  
2.50  
2.24  
2.17  
0.00

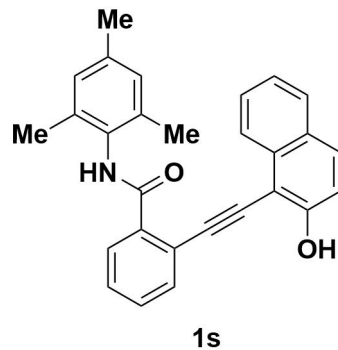

<sup>1</sup>H NMR (500 MHz, DMSO-d<sub>6</sub>) of 1s

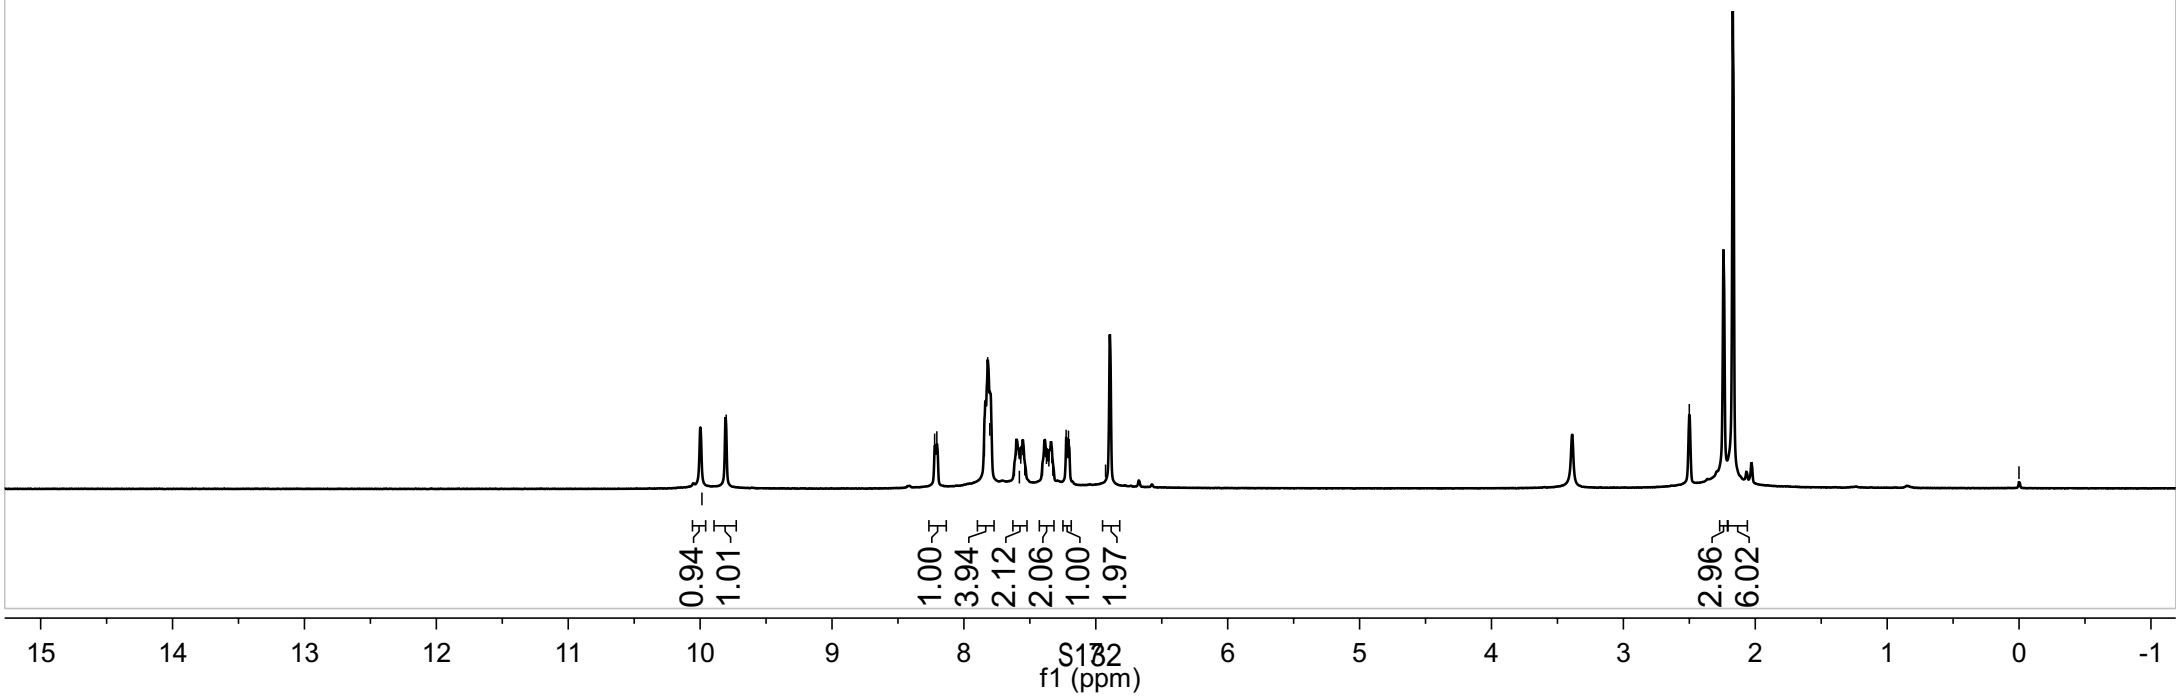

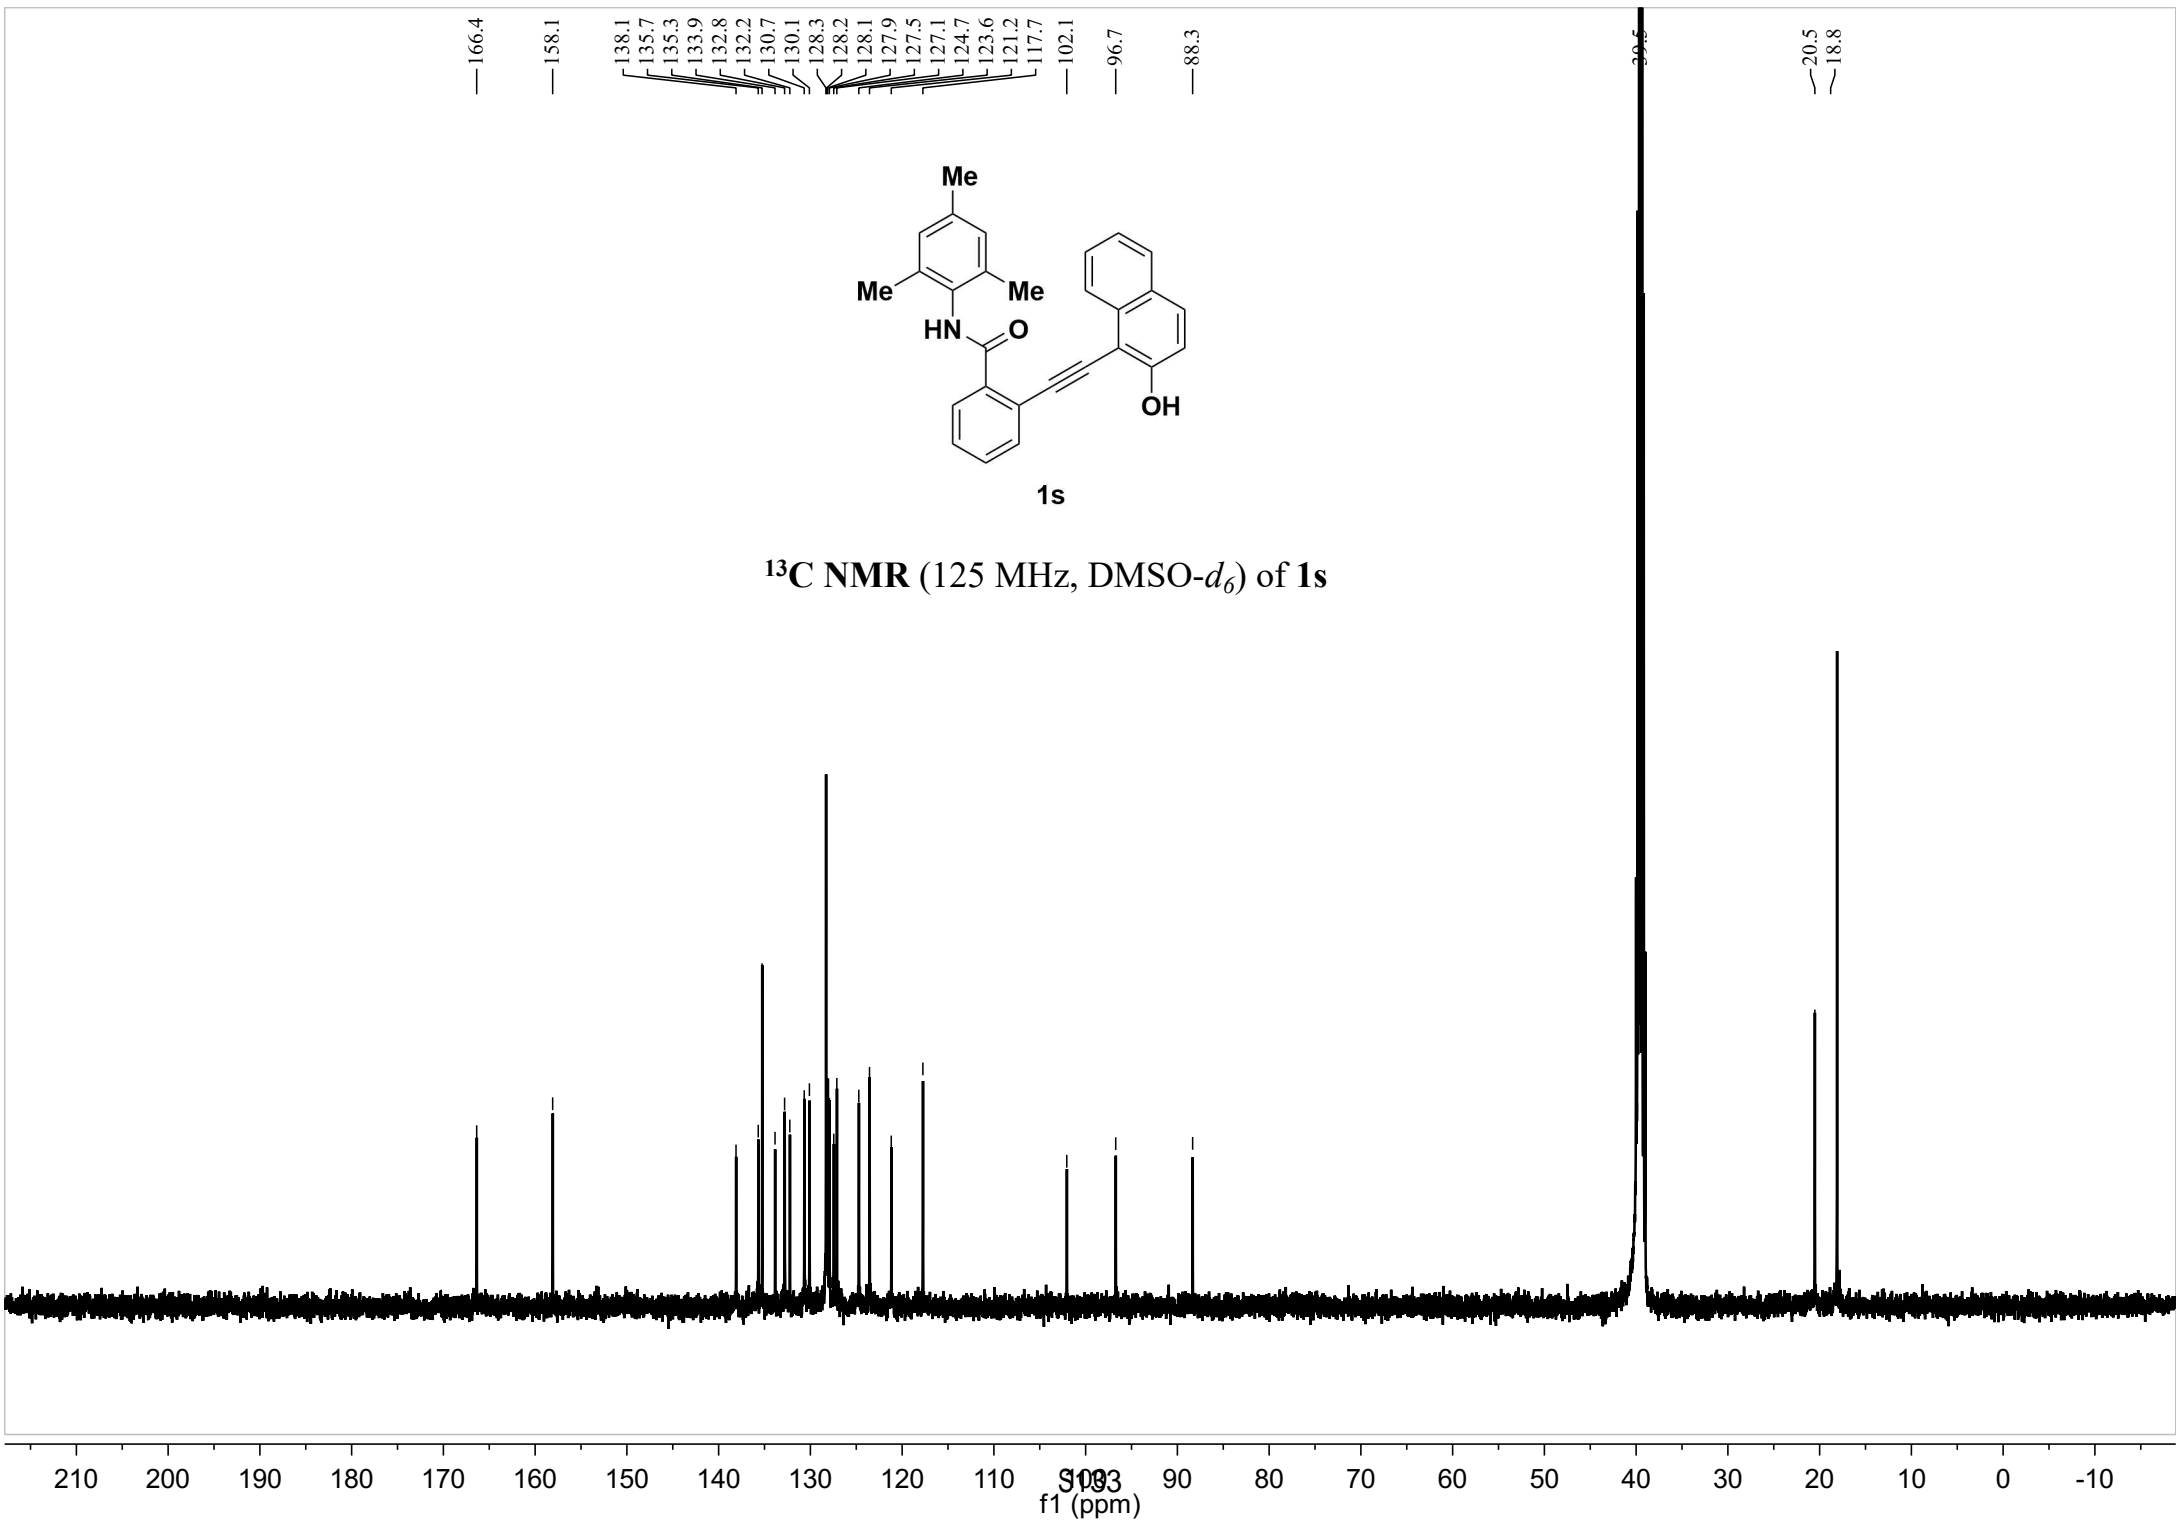

10.02 8.87 8.58 8.29 8.27 7.99 7.97 7.91 7.89 7.87 7.84 7.83 7.81 7.66 7.64 7.59 7.57 7.52 7.50 7.47 7.45 7.43 7.41 7.34 7.32 7.23 7.21 7.23 2.05 0.00

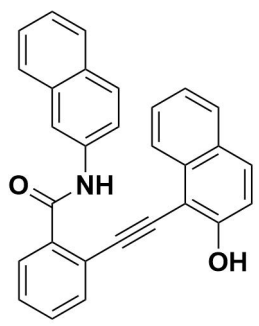

**1t**

<sup>1</sup>H NMR (400 MHz, Acetone-d<sub>6</sub>) of **1t**

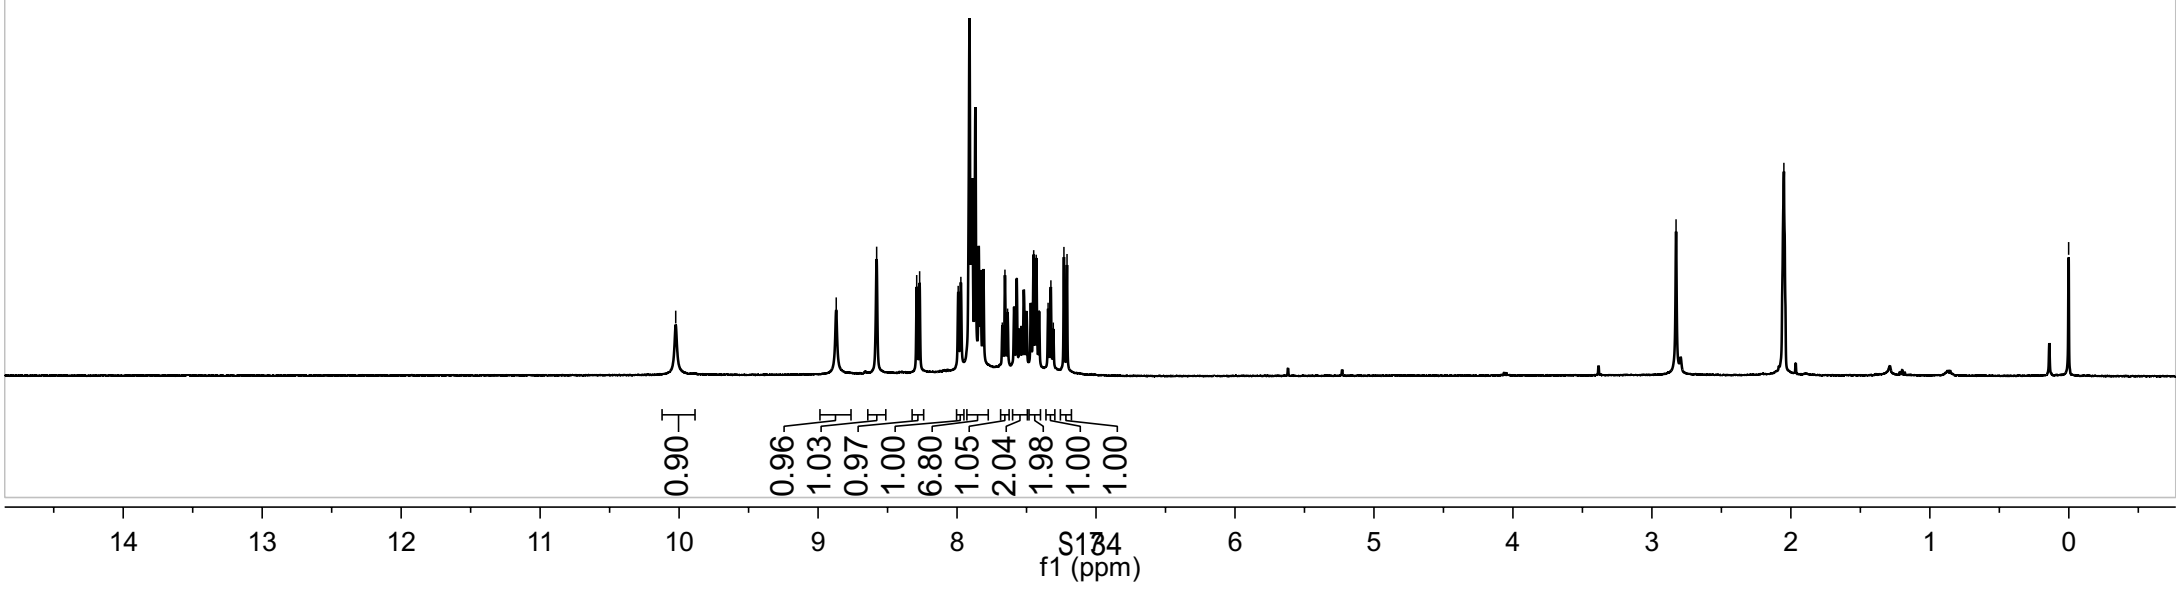

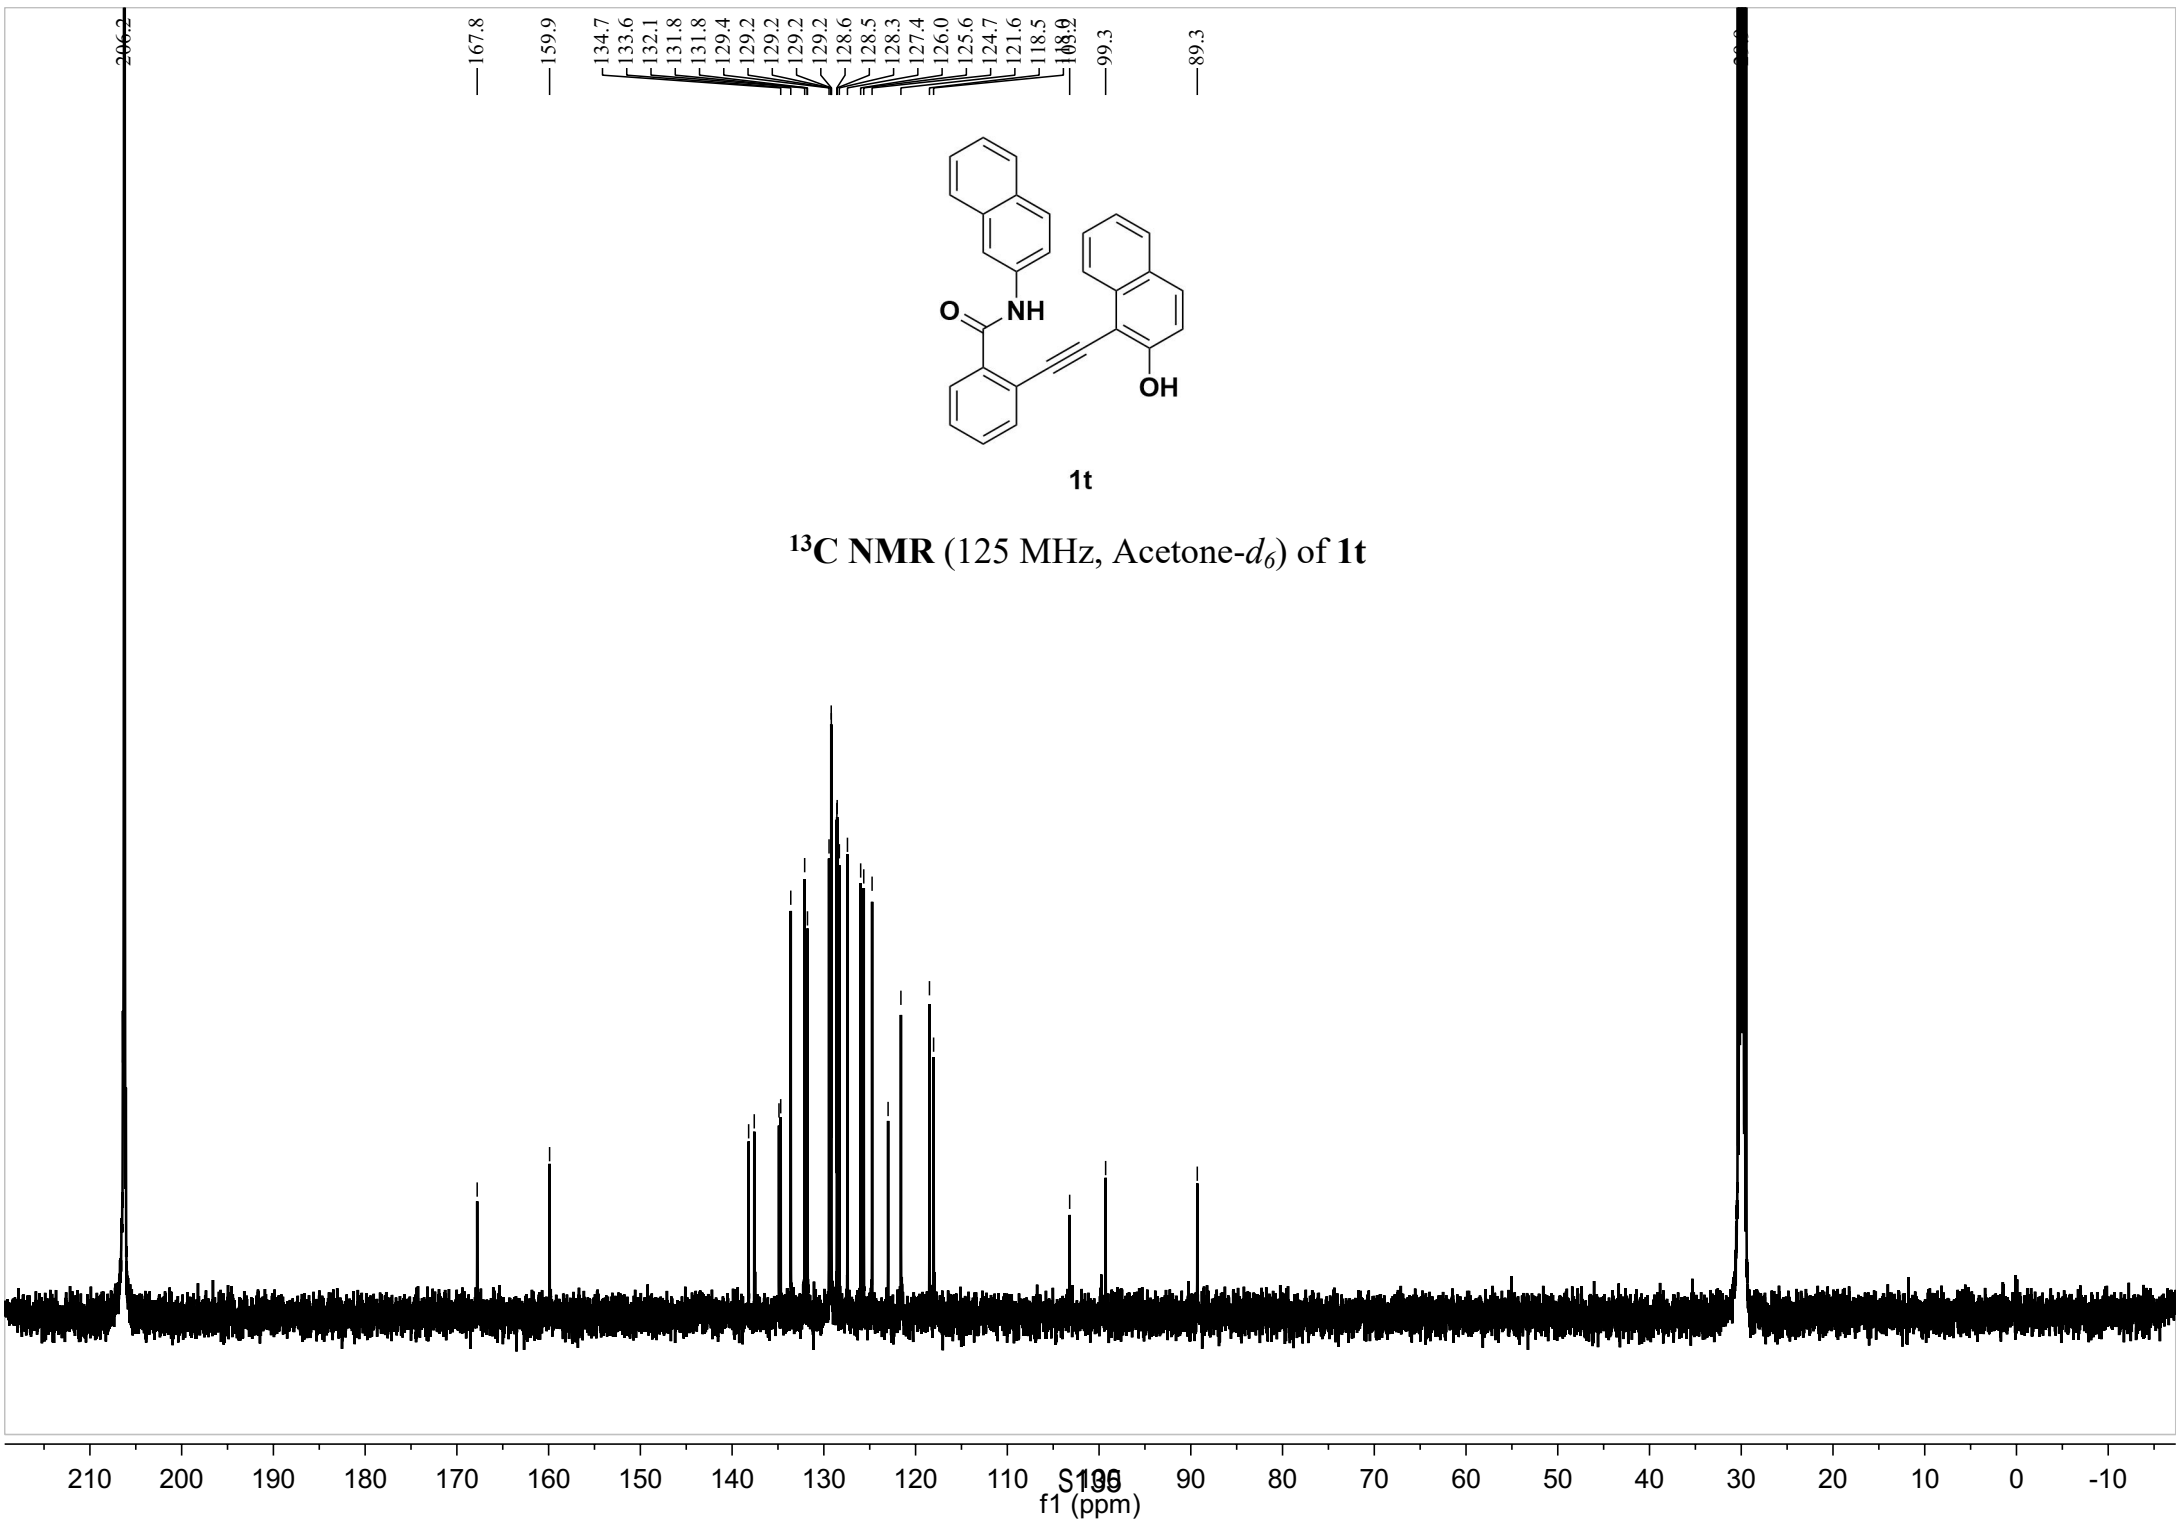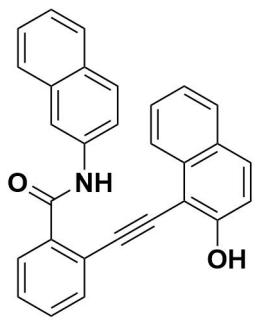

1t

<sup>13</sup>C NMR (125 MHz, Acetone-*d*<sub>6</sub>) of 1t

- 167.8
- 159.9
- 134.7
- 133.6
- 132.1
- 131.8
- 129.4
- 129.2
- 129.2
- 129.2
- 128.6
- 128.5
- 128.3
- 127.4
- 126.0
- 125.6
- 124.7
- 121.6
- 118.5
- 108.9
- 99.3
- 89.3

210 200 190 180 170 160 150 140 130 120 110 100 90 80 70 60 50 40 30 20 10 0 -10

f1 (ppm)

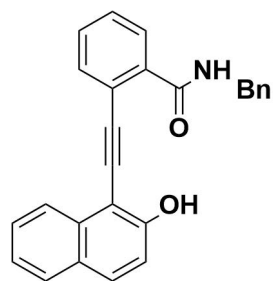

**1u**

<sup>1</sup>H NMR (500 MHz, DMSO-*d*<sub>6</sub>) of **1u**

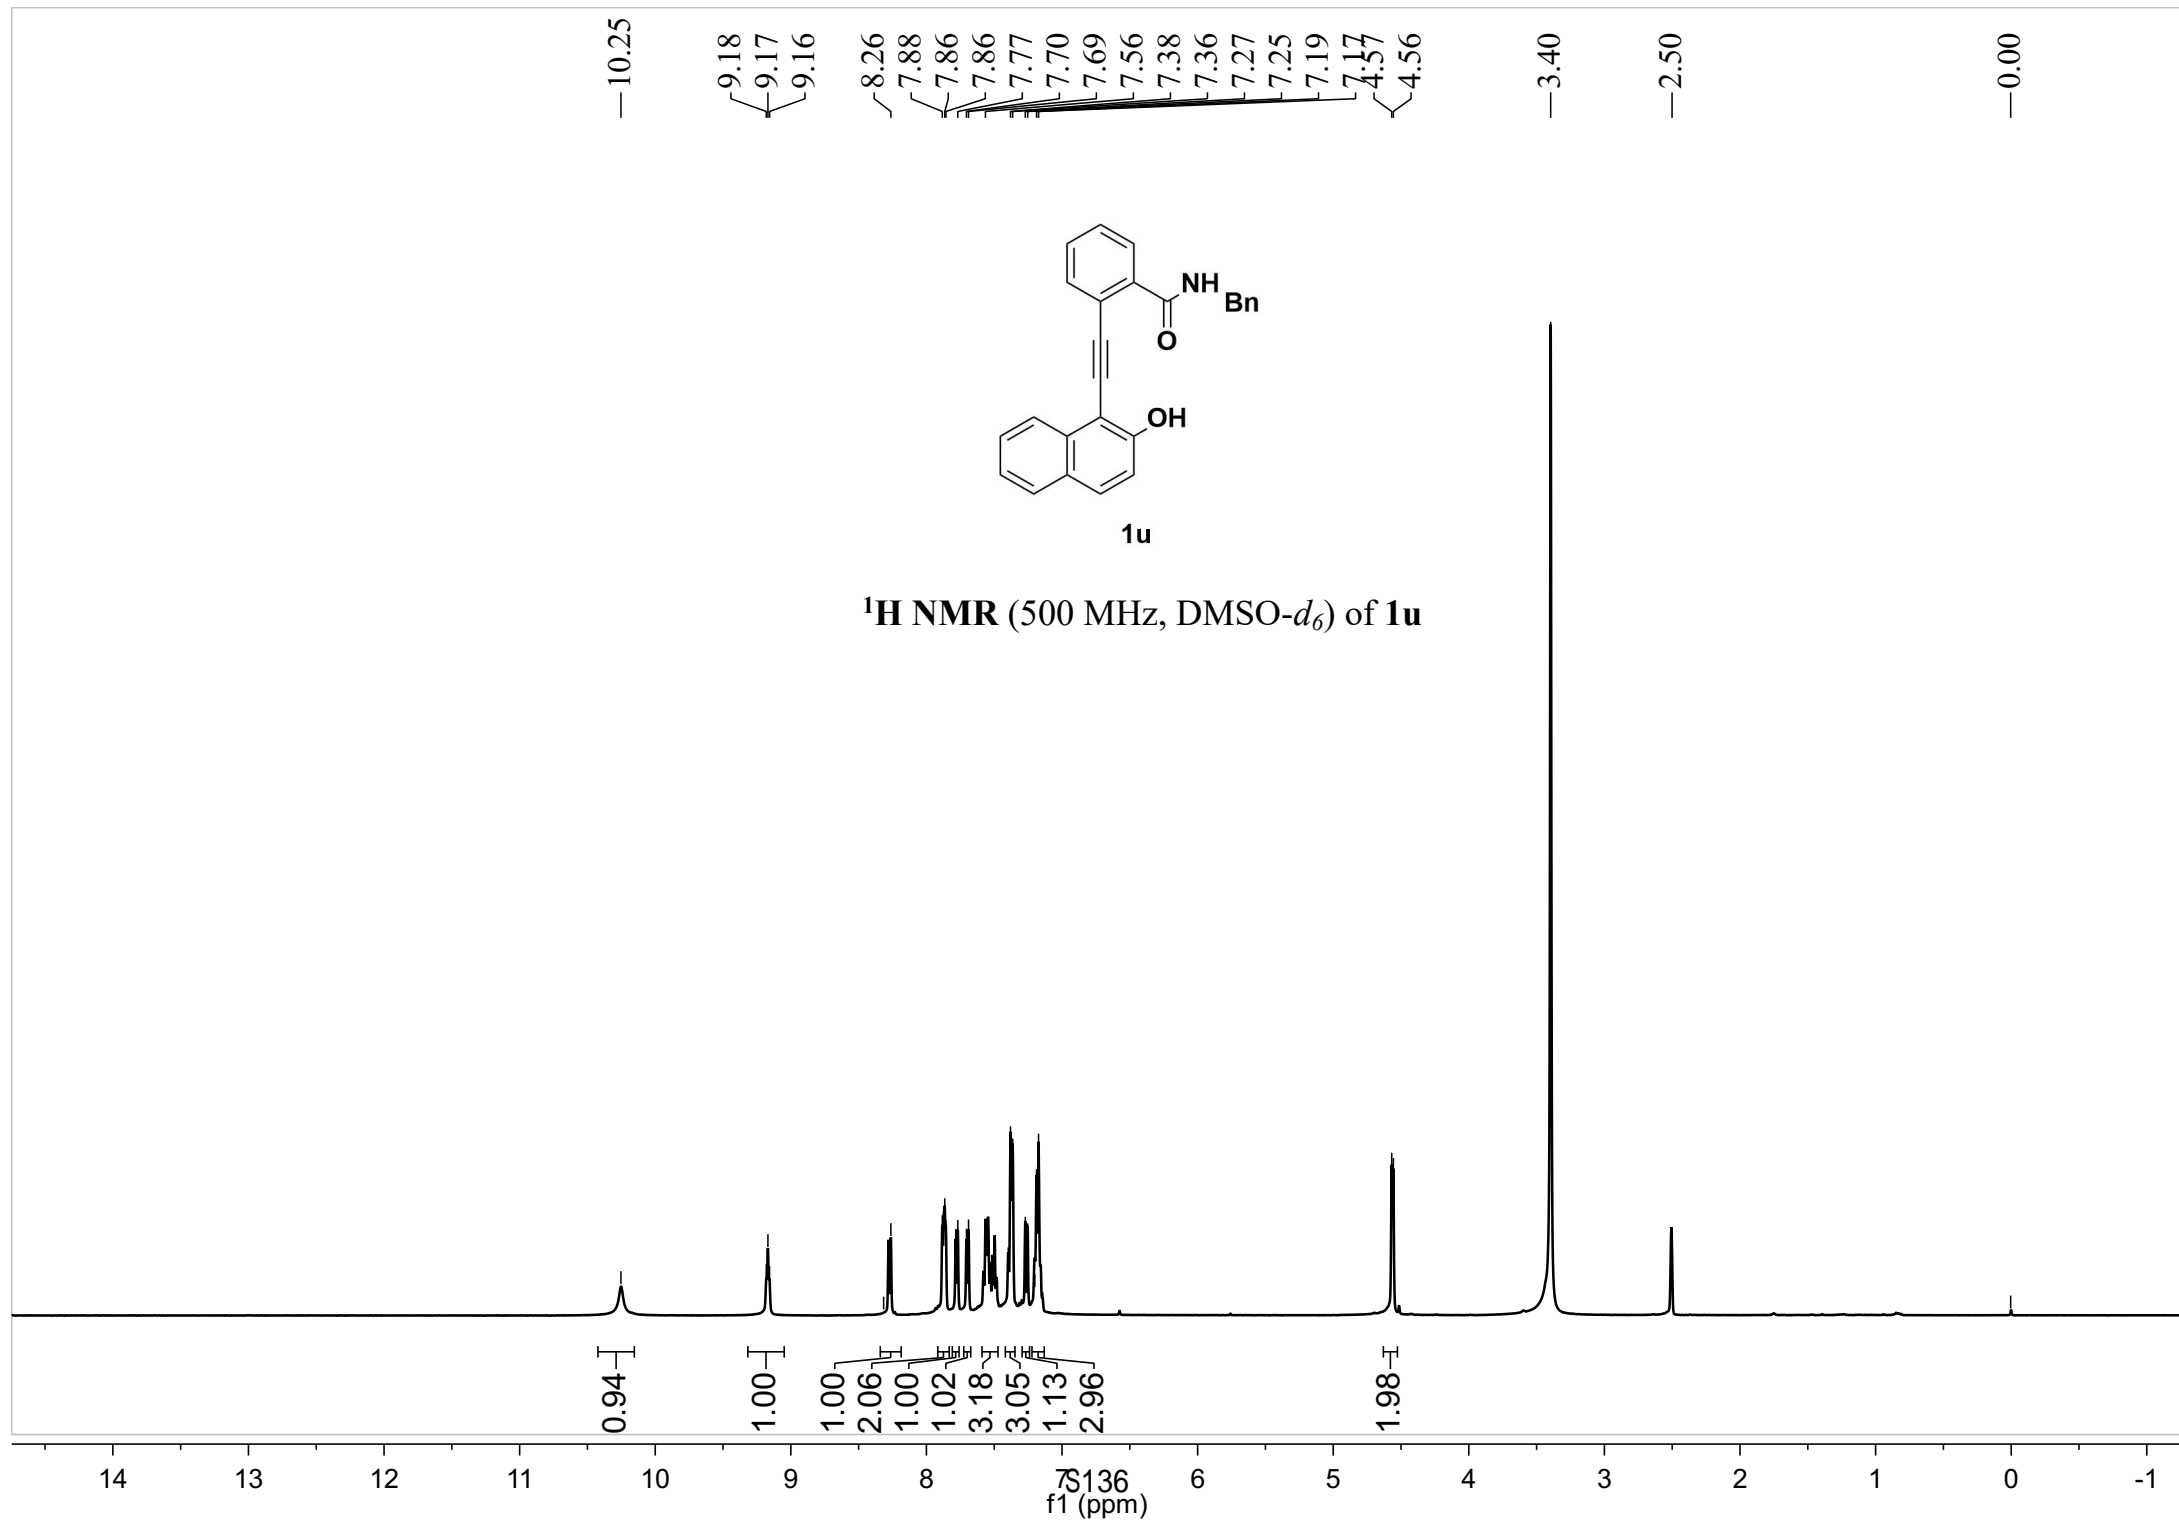



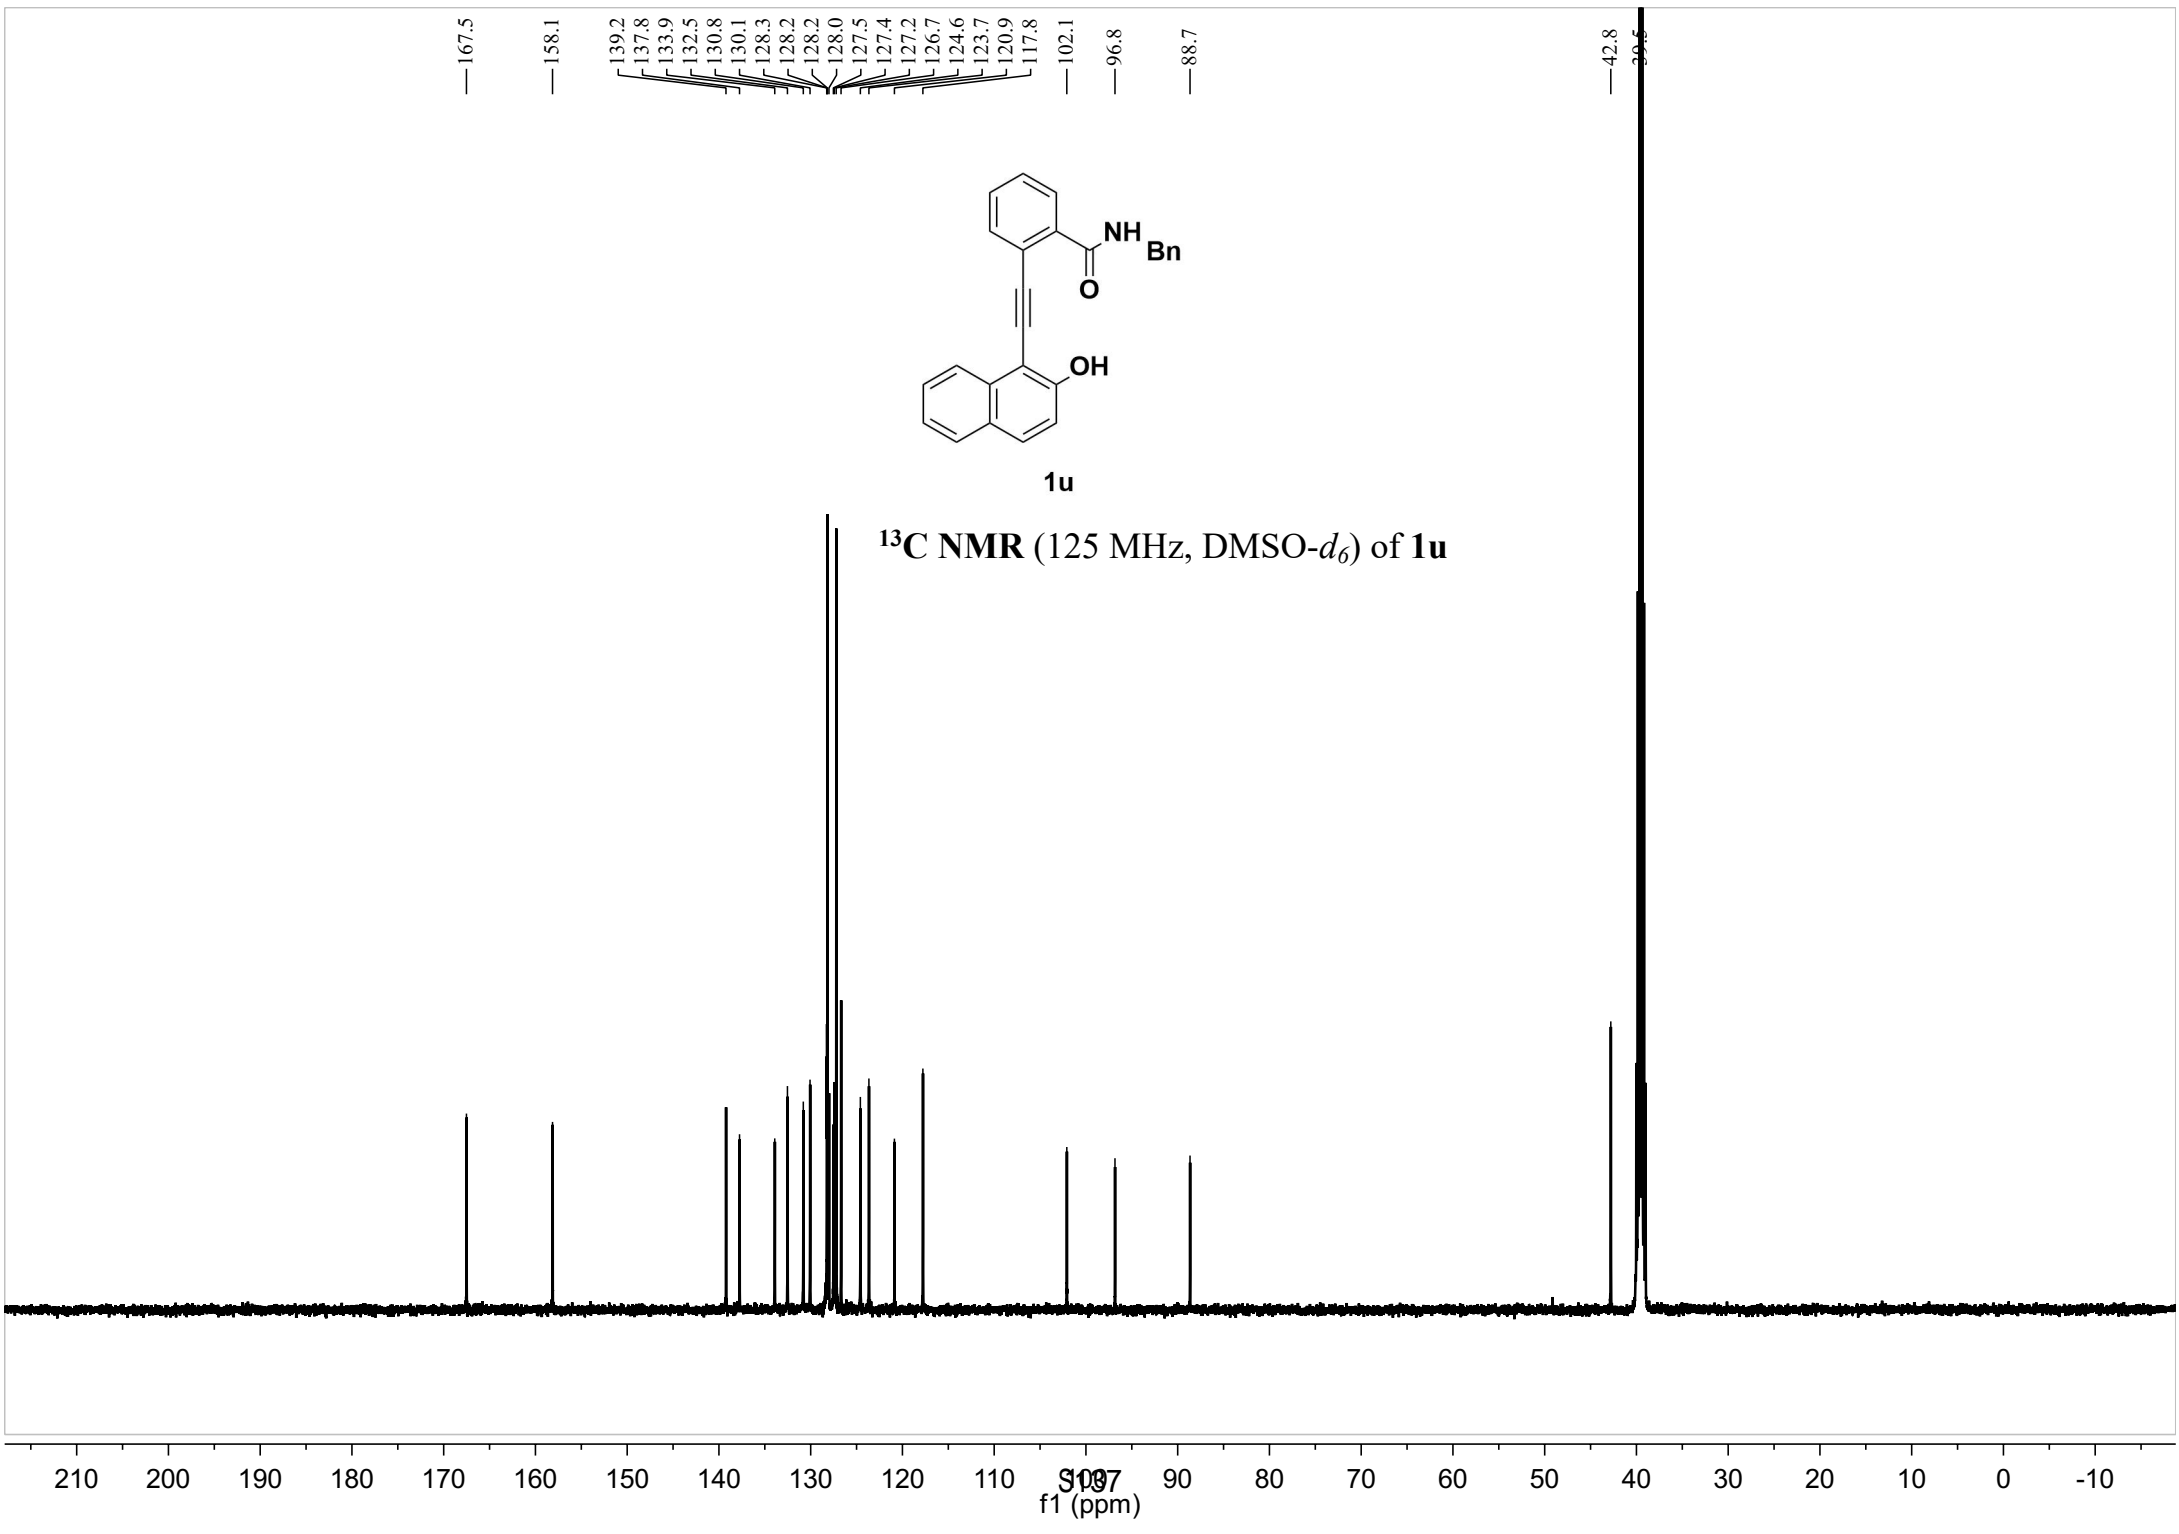

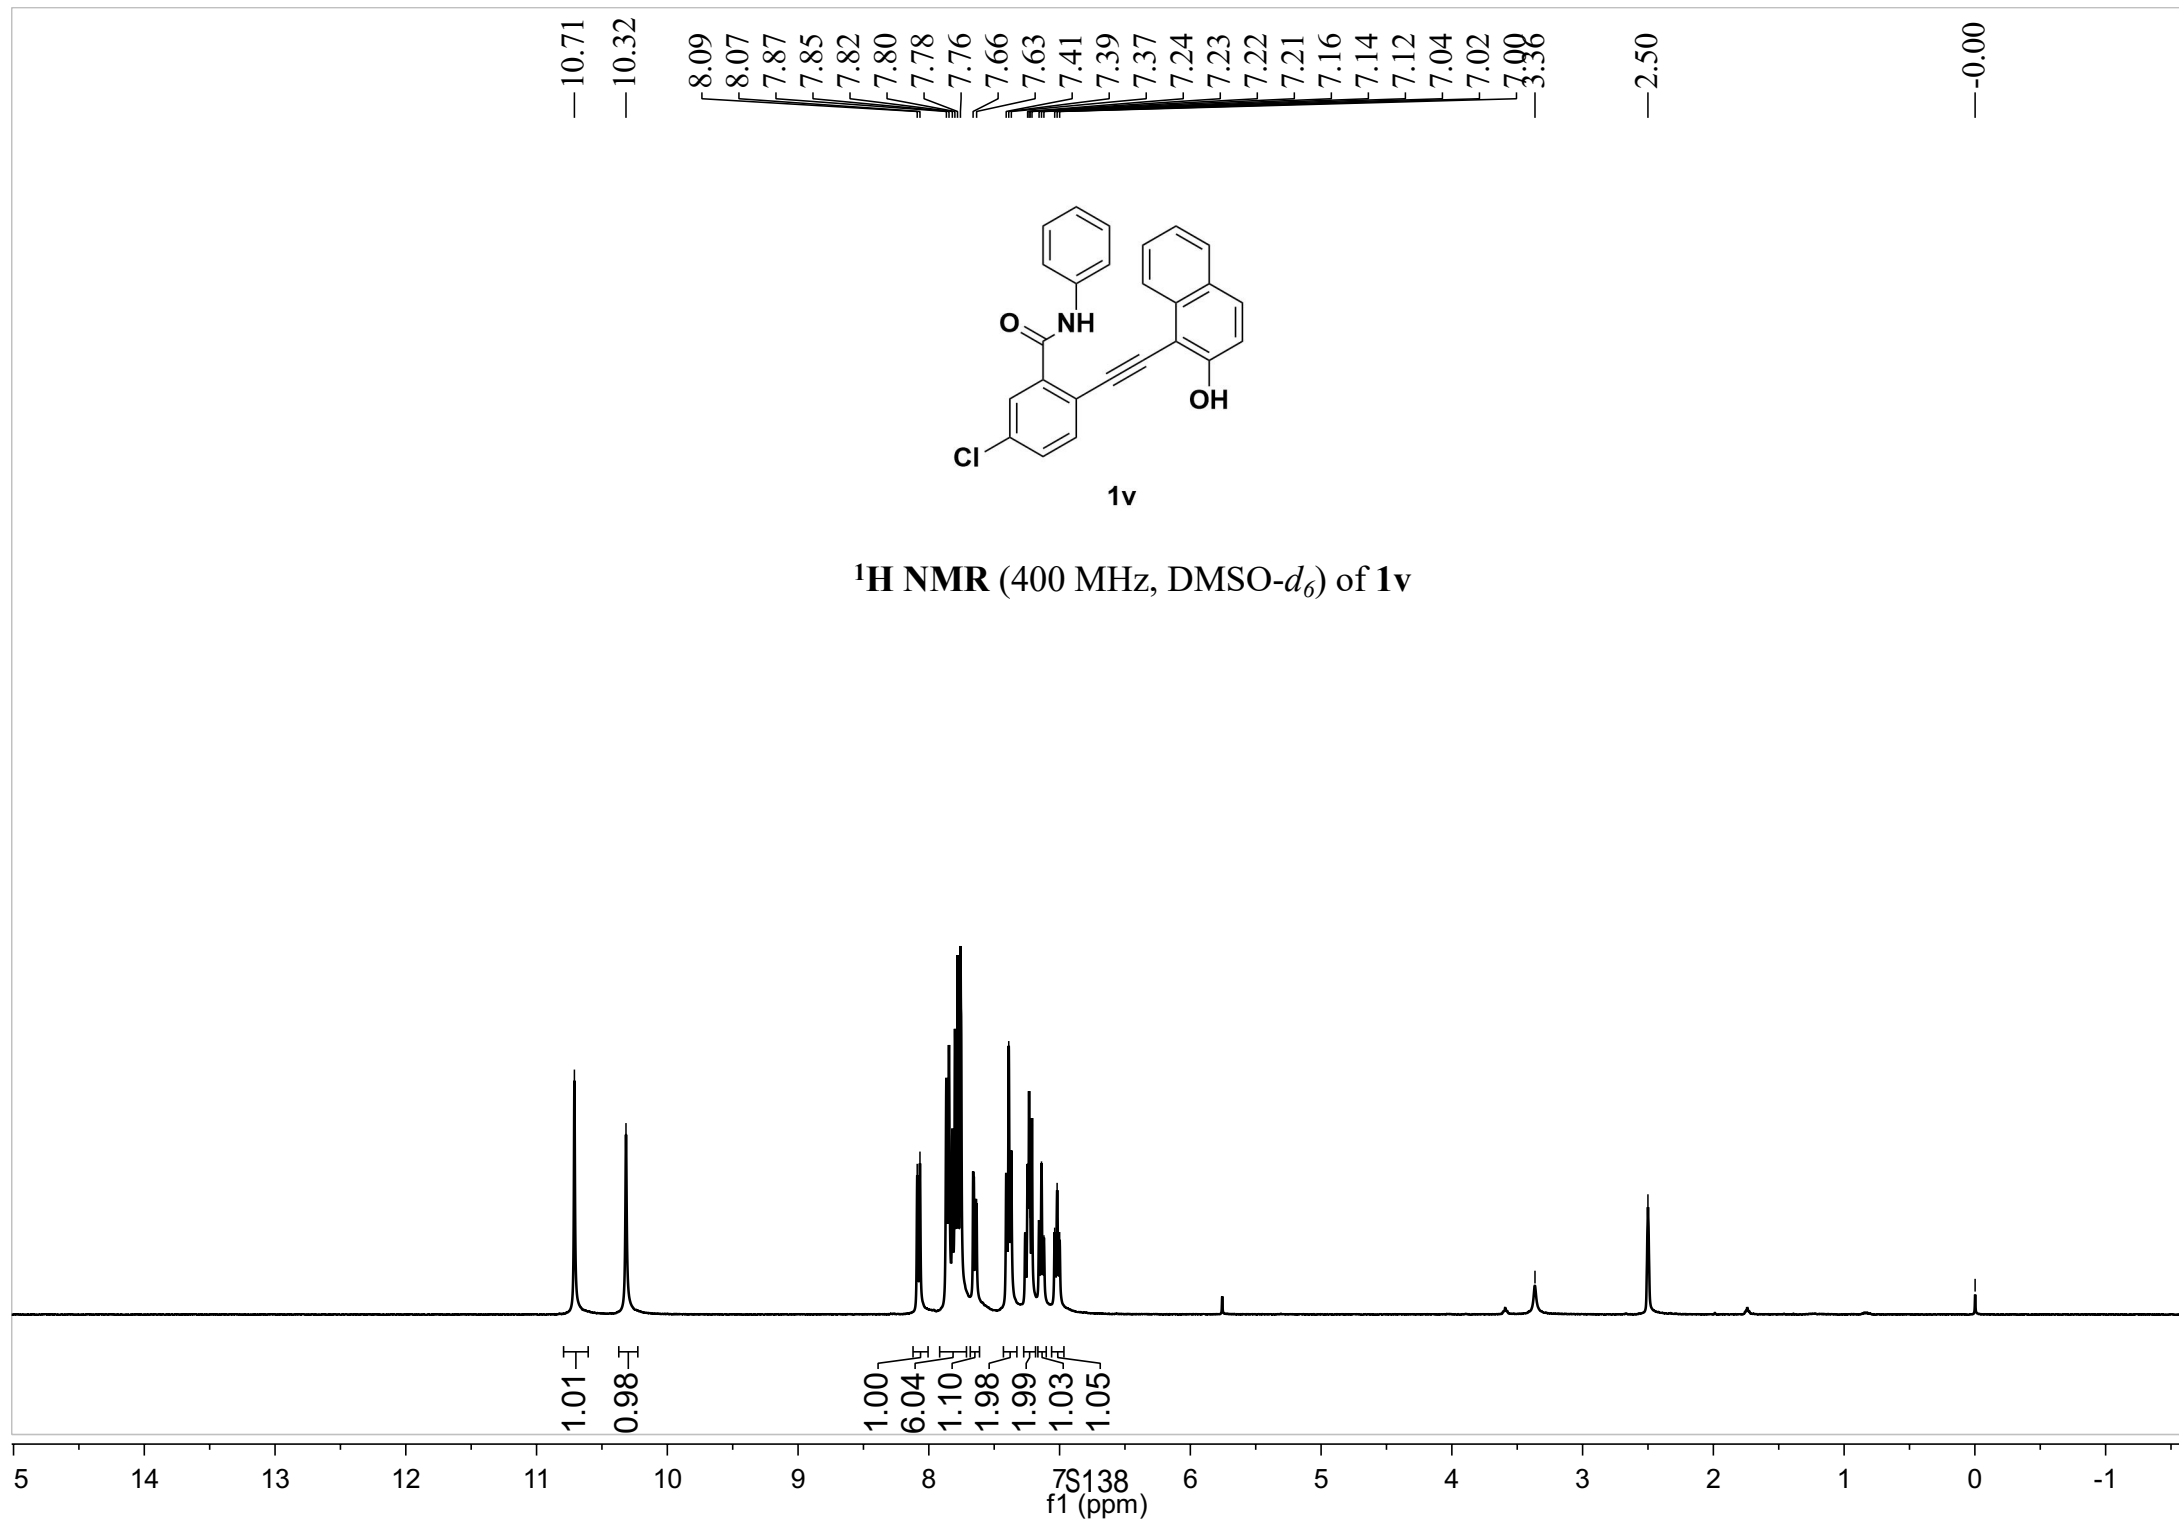

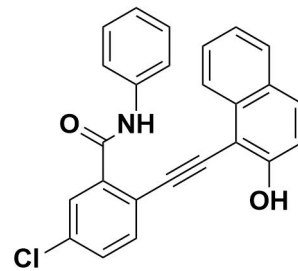

1v

<sup>13</sup>C NMR (125 MHz, DMSO-*d*<sub>6</sub>) of 1v

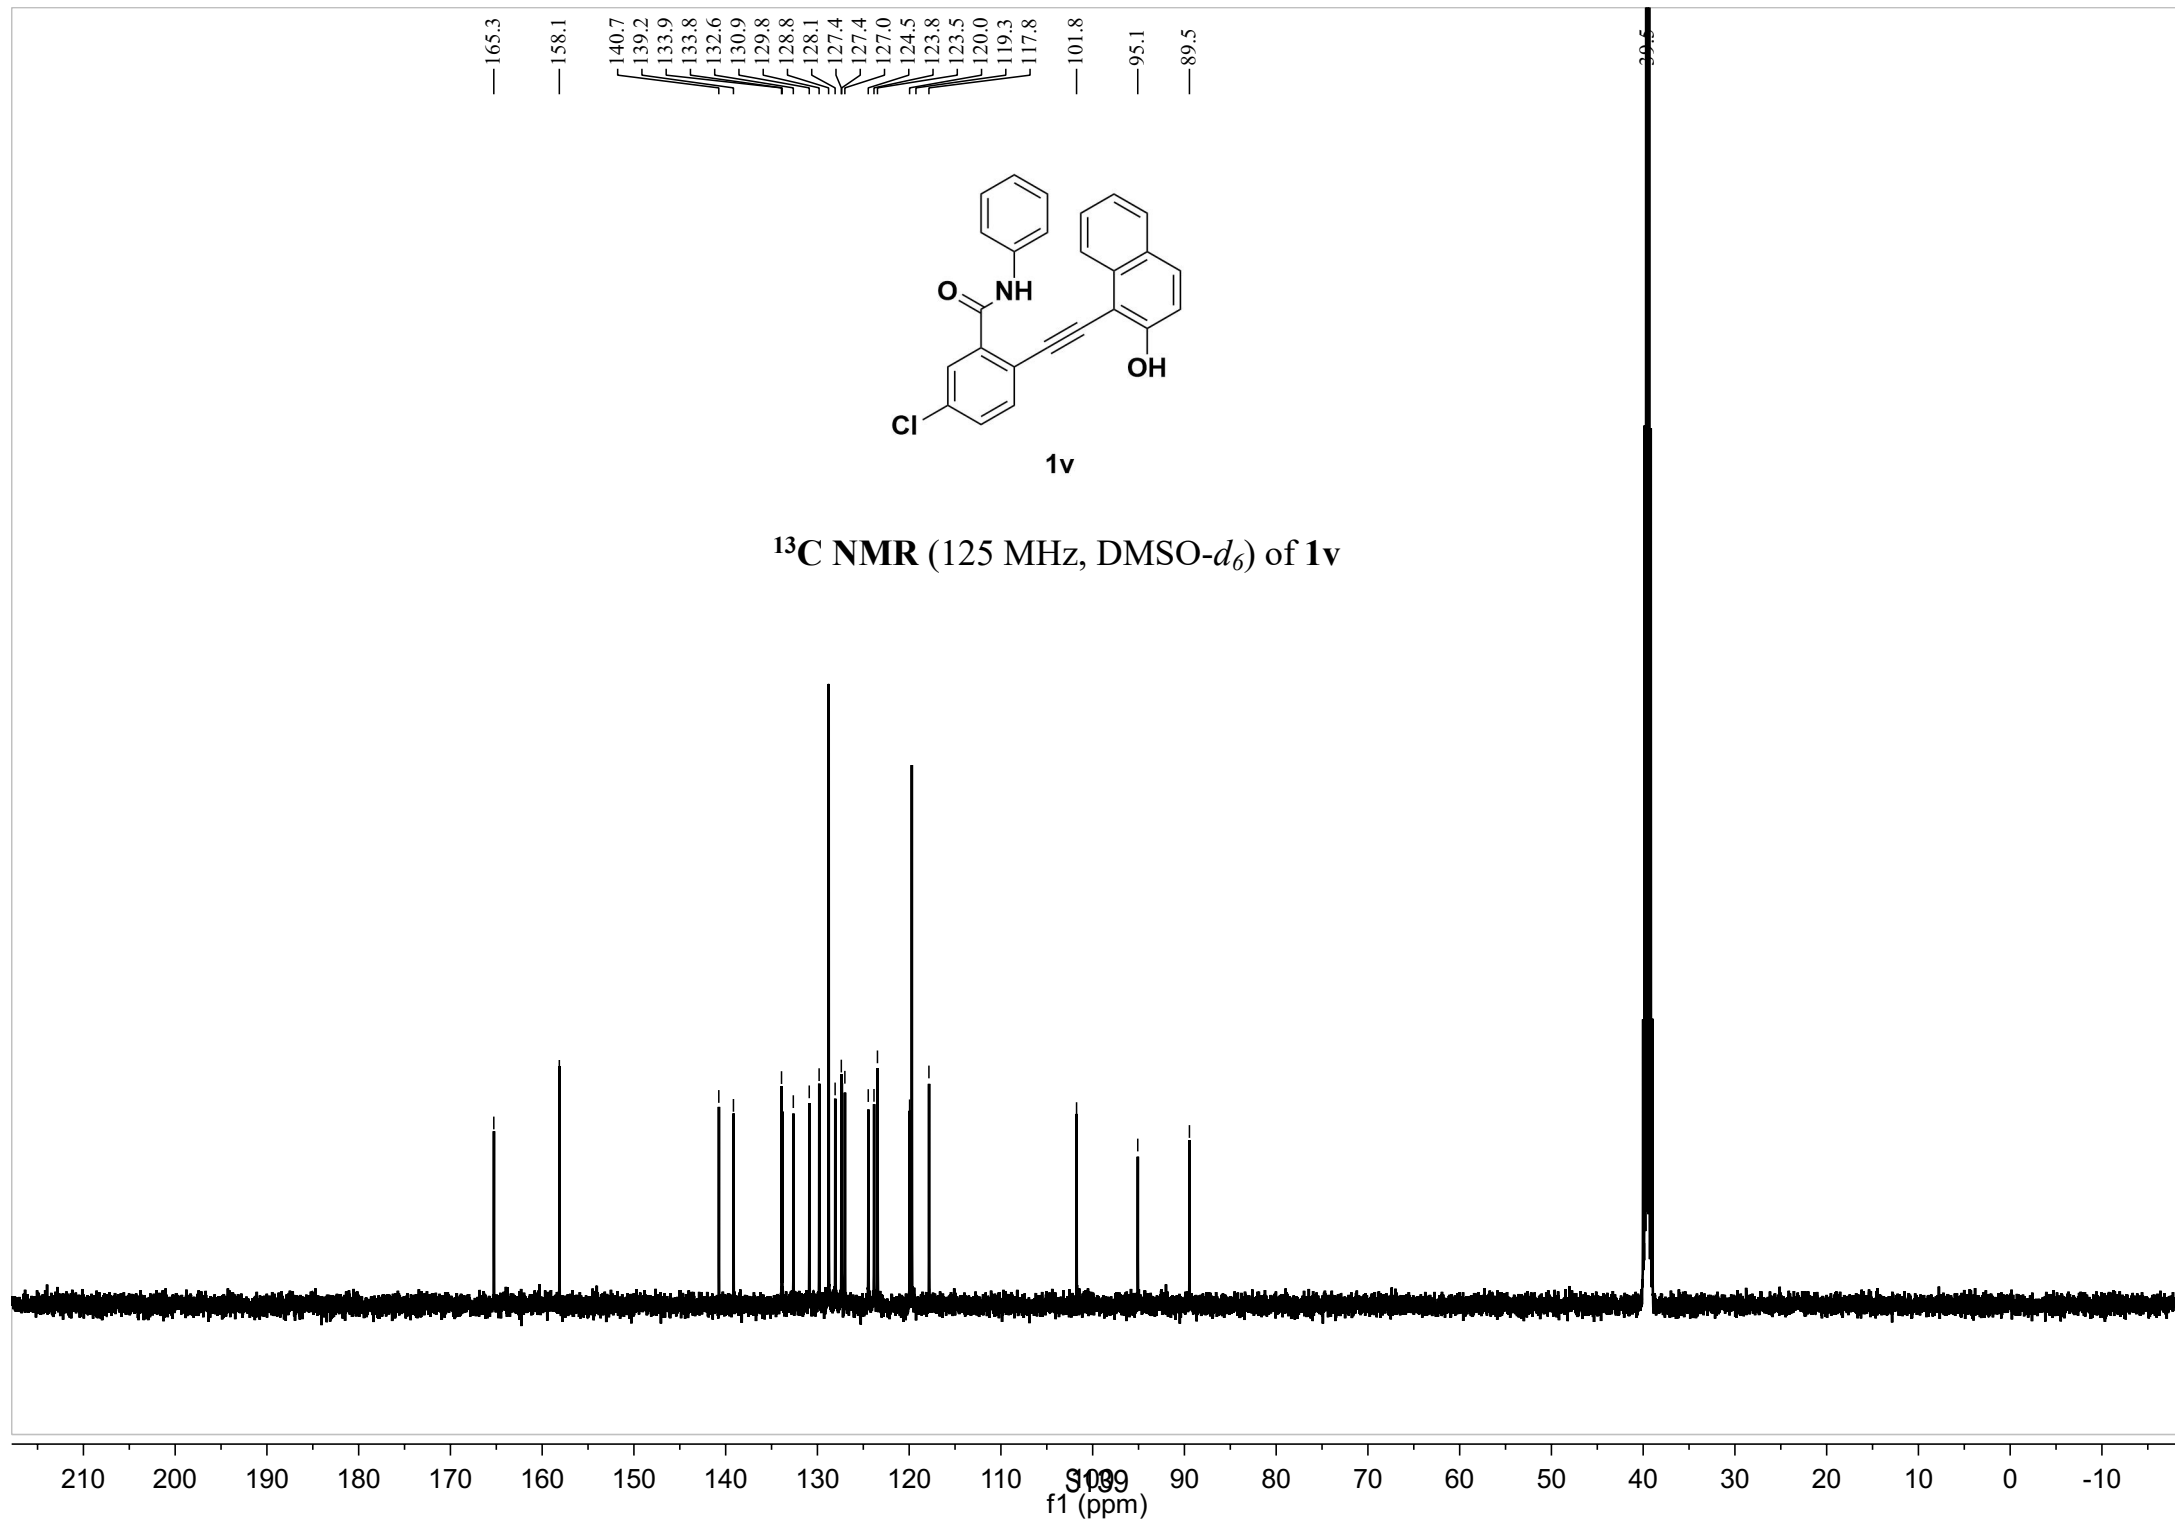

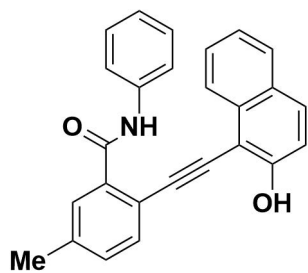

**1w**

<sup>1</sup>H NMR (400 MHz, DMSO-*d*<sub>6</sub>) of **1w**

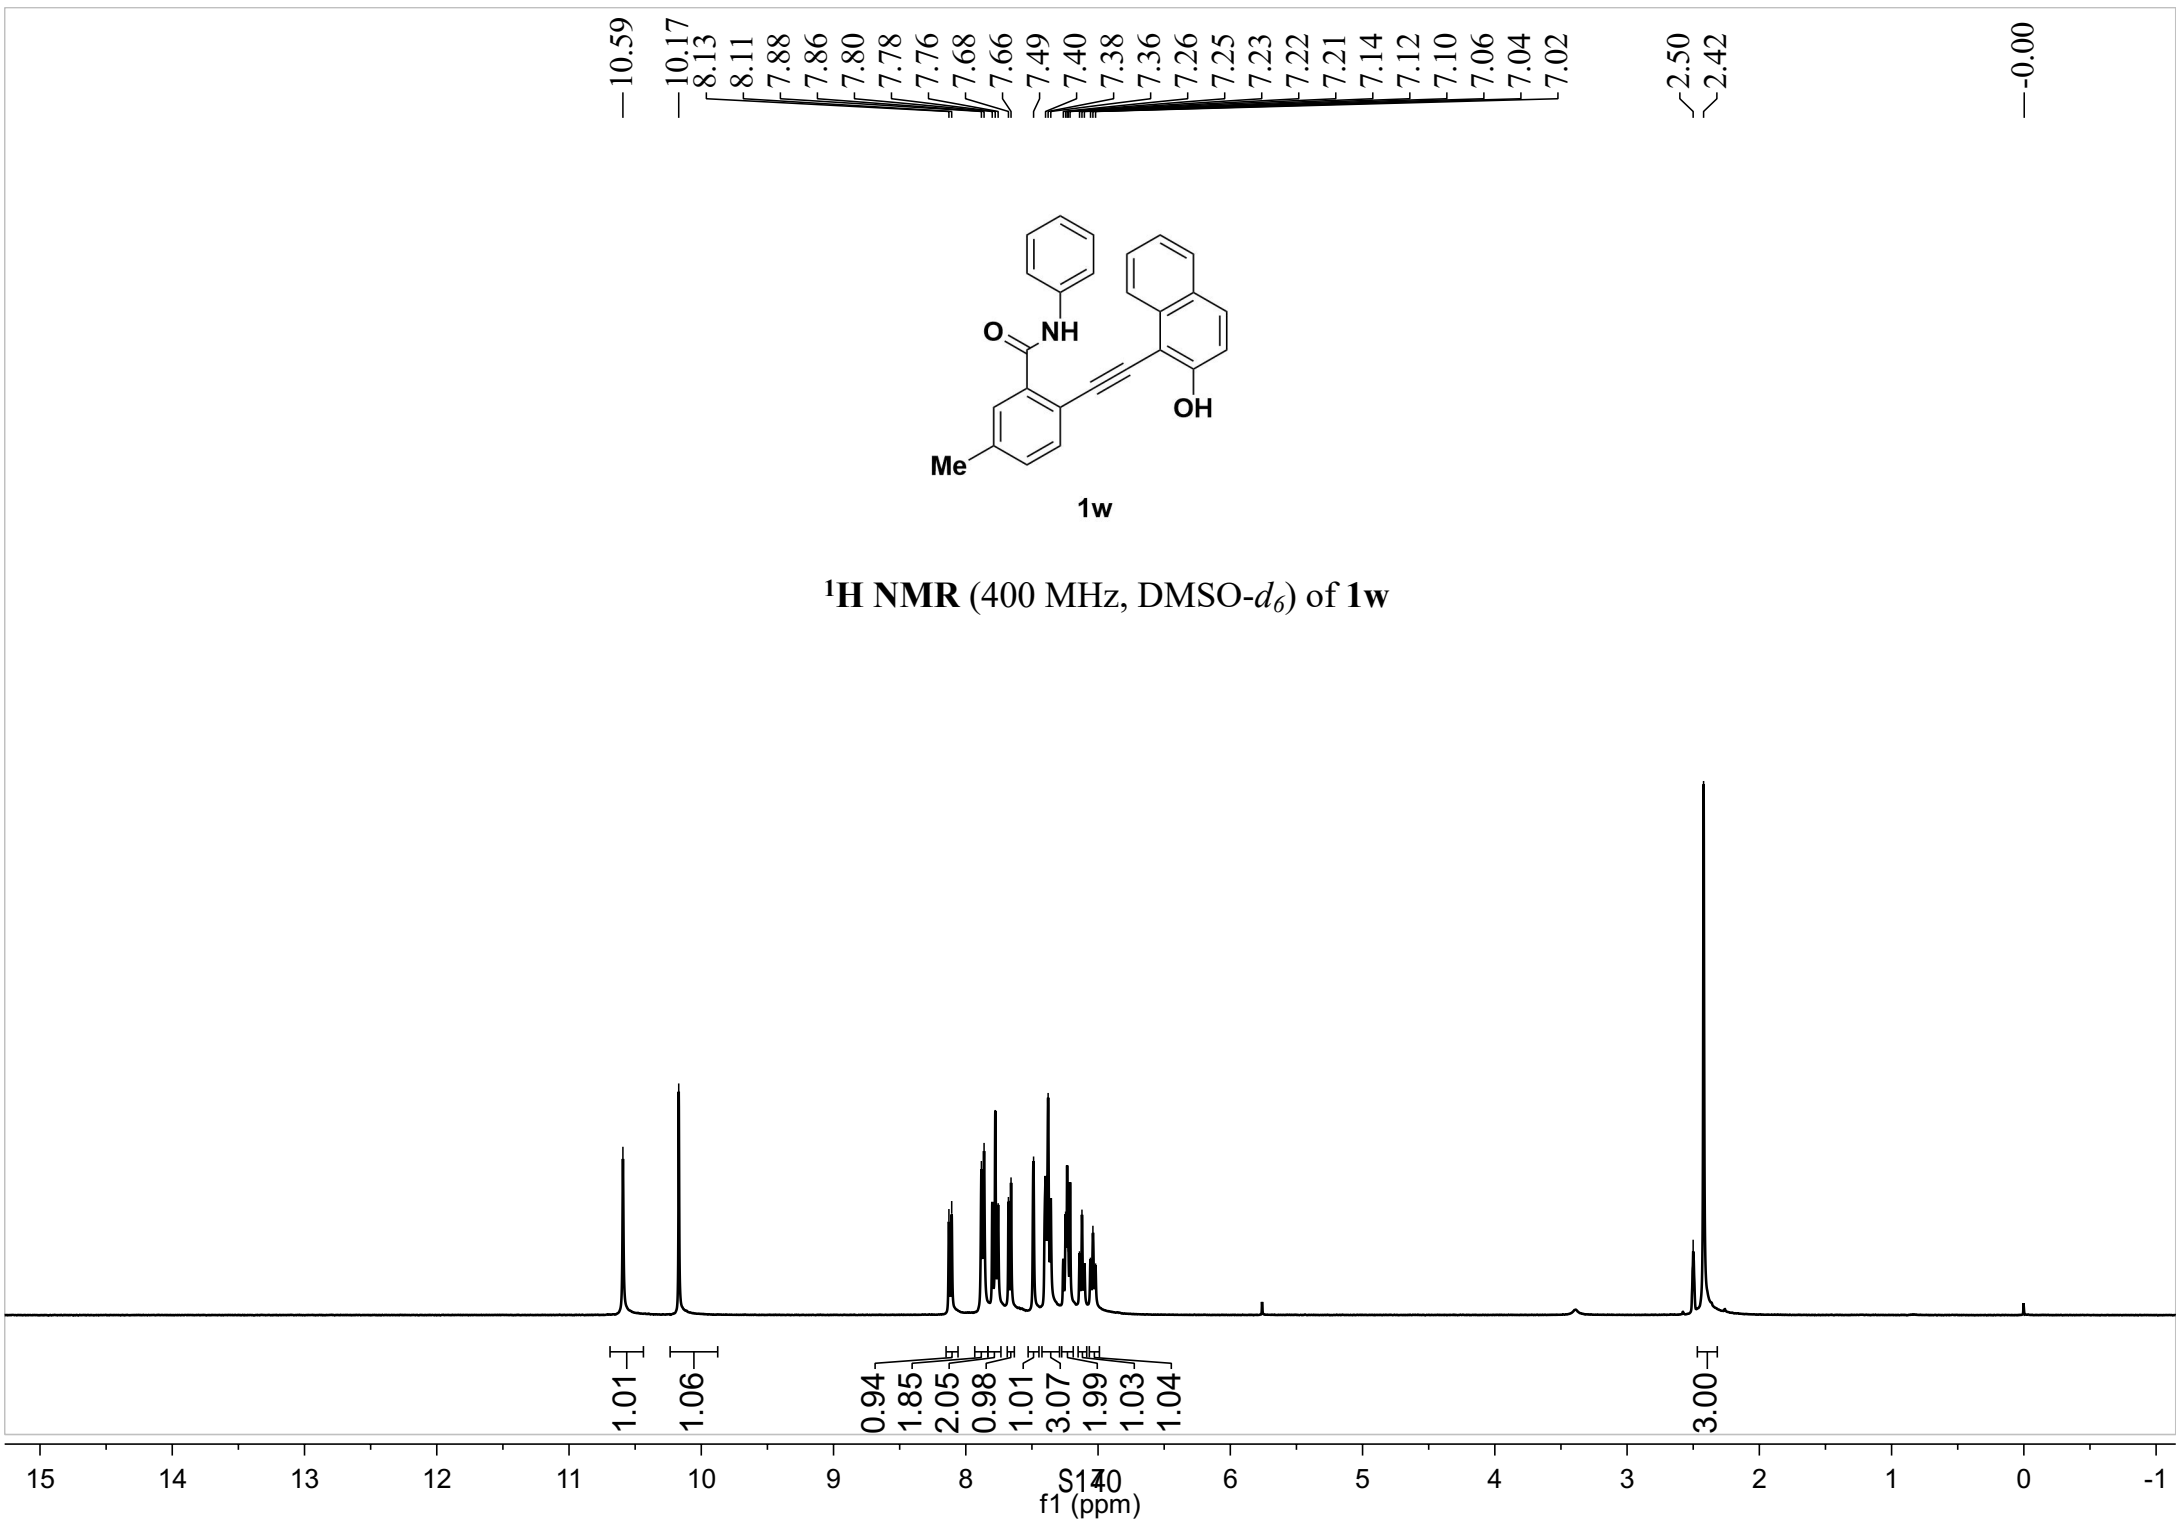

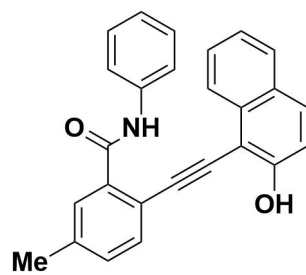

**1w**

$^{13}\text{C}$  NMR (125 MHz,  $\text{DMSO-}d_6$ ) of **1w**

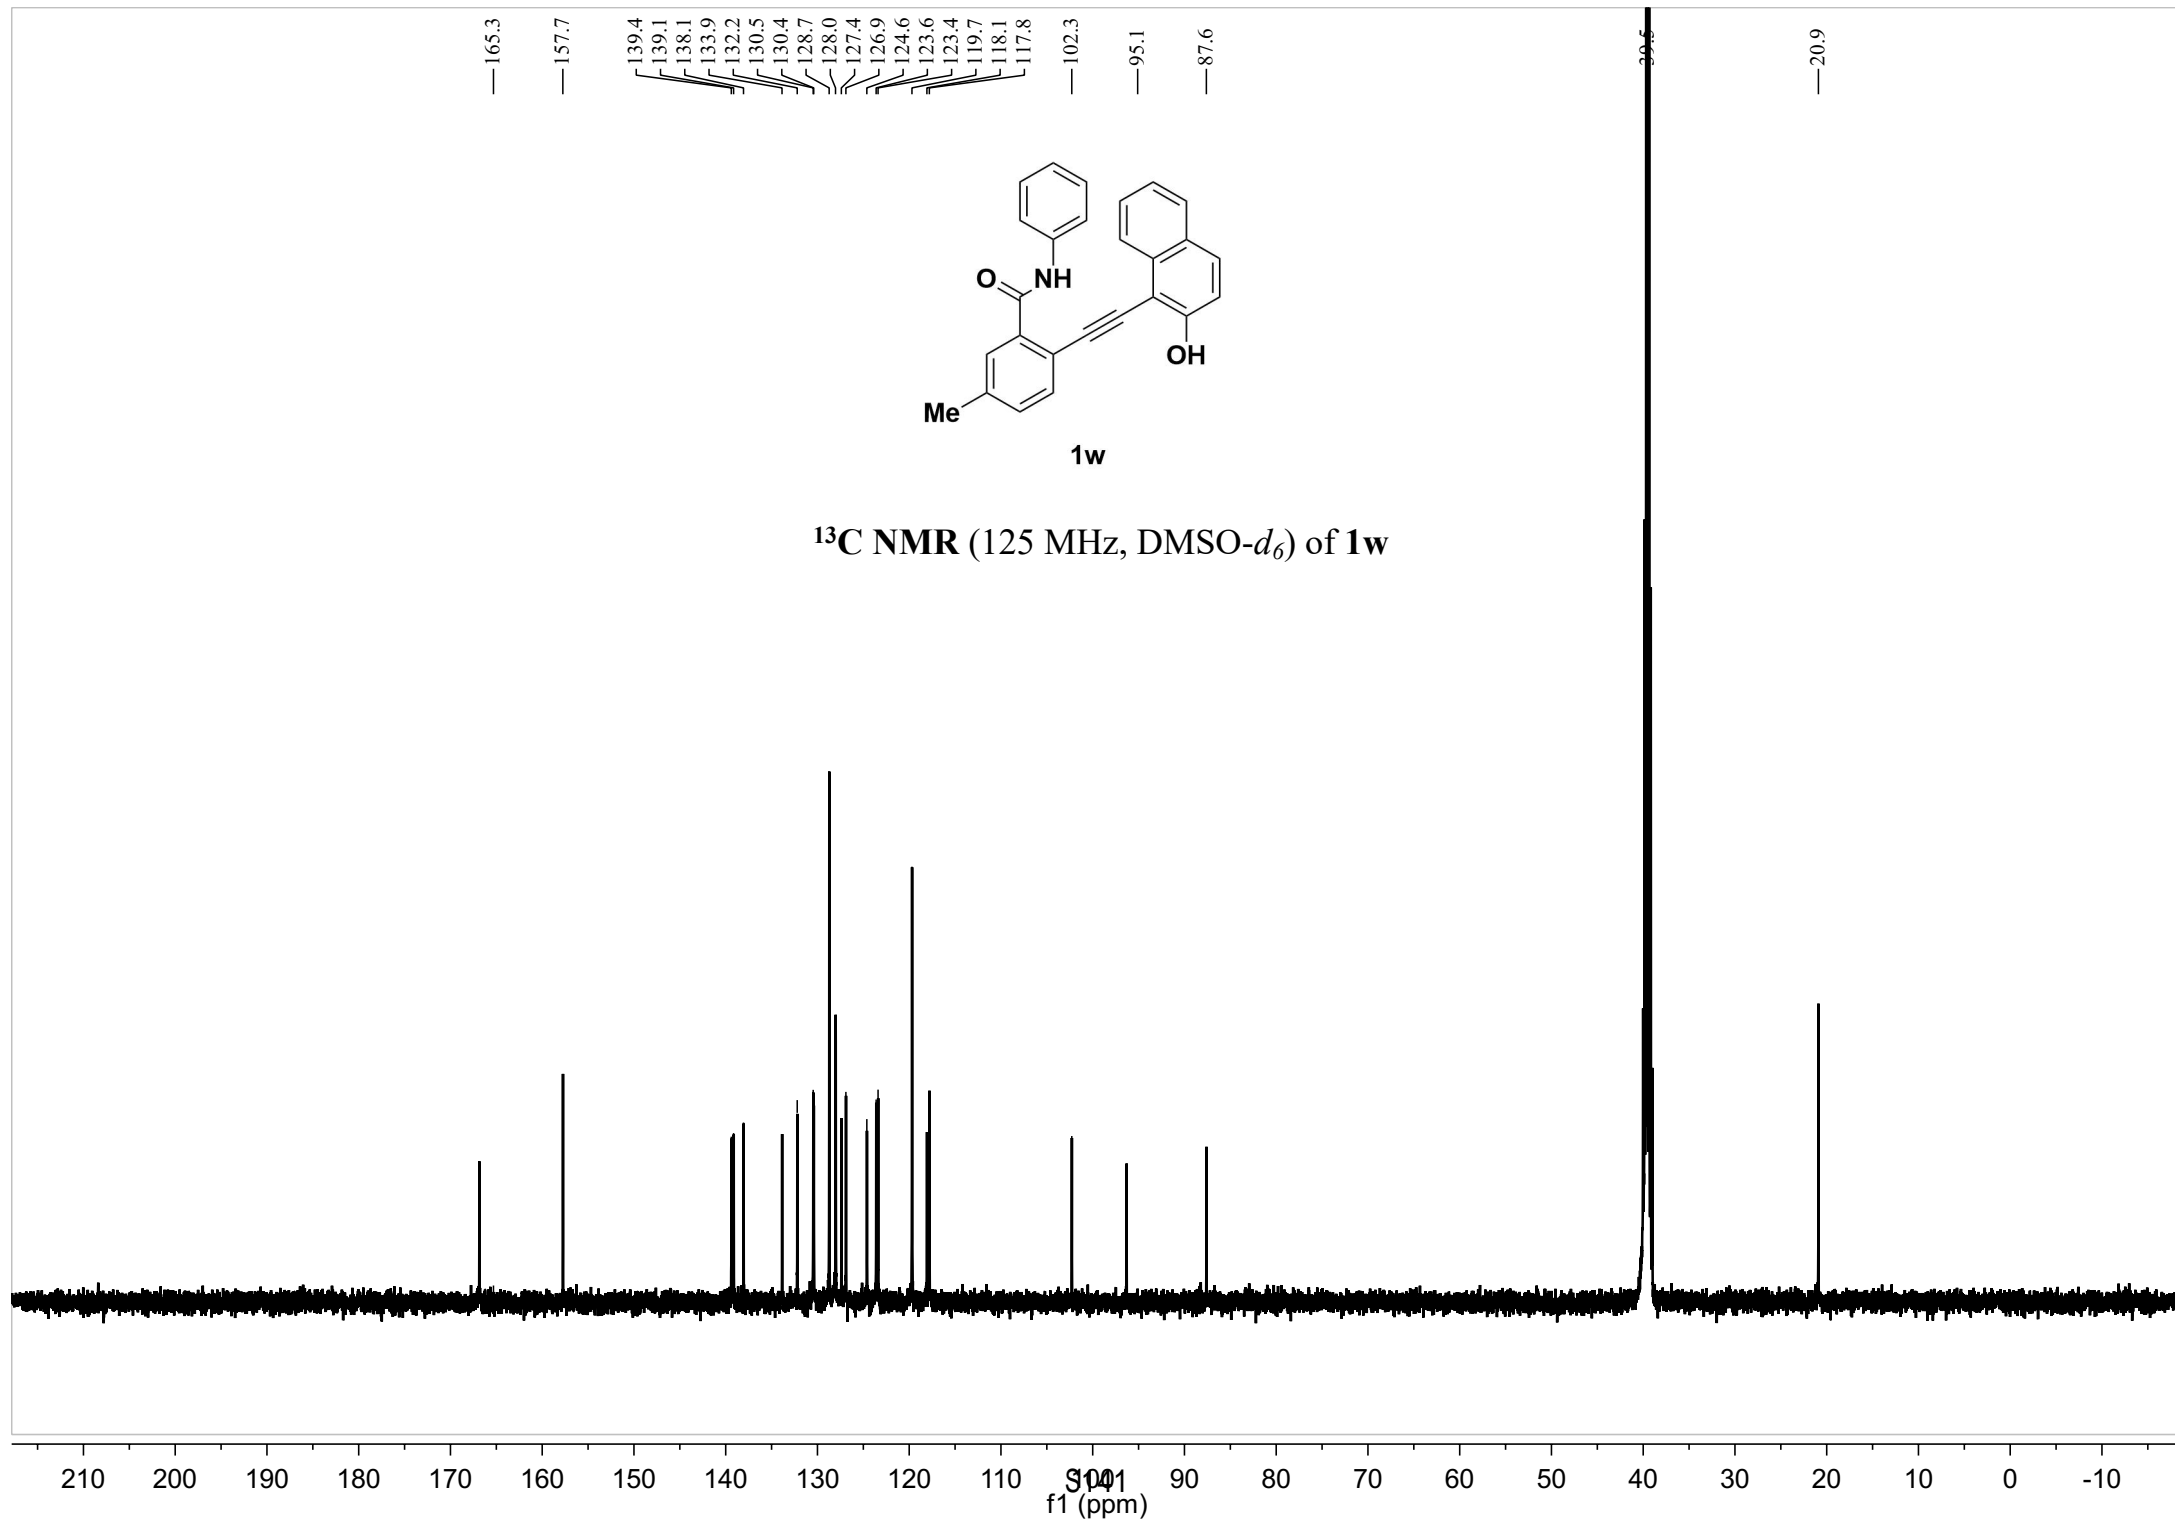

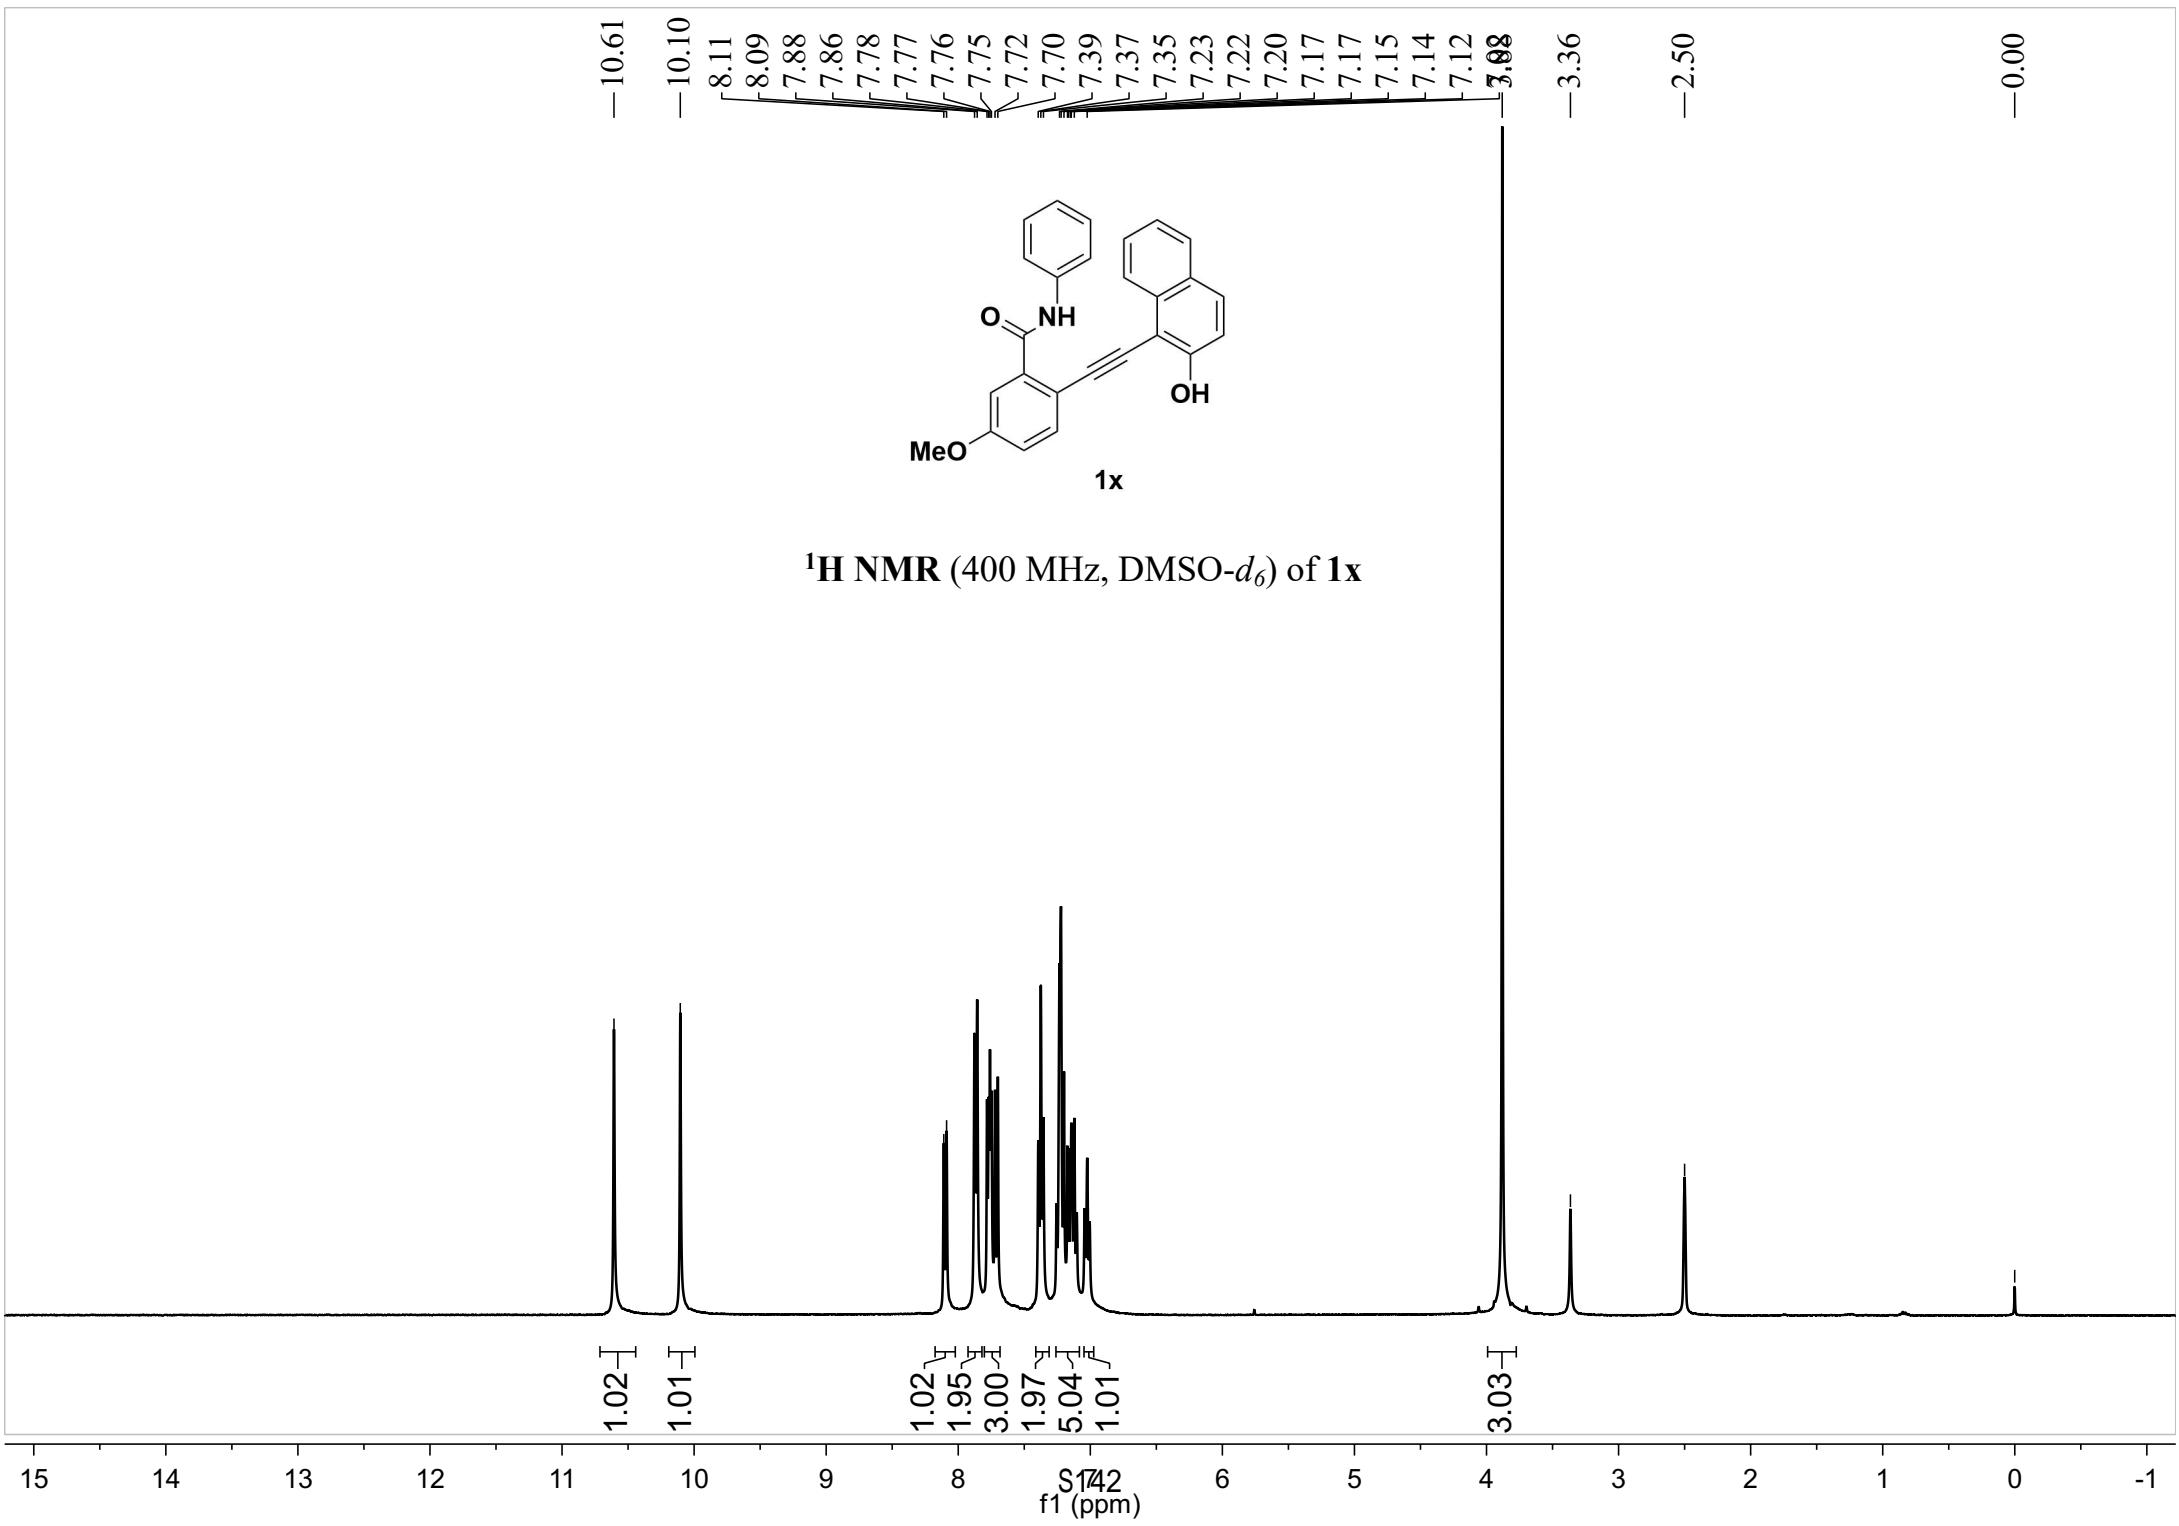

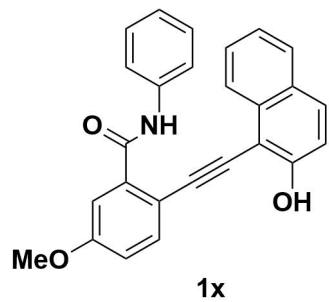

$^{13}\text{C}$  NMR (100 MHz,  $\text{DMSO-}d_6$ ) of 1x

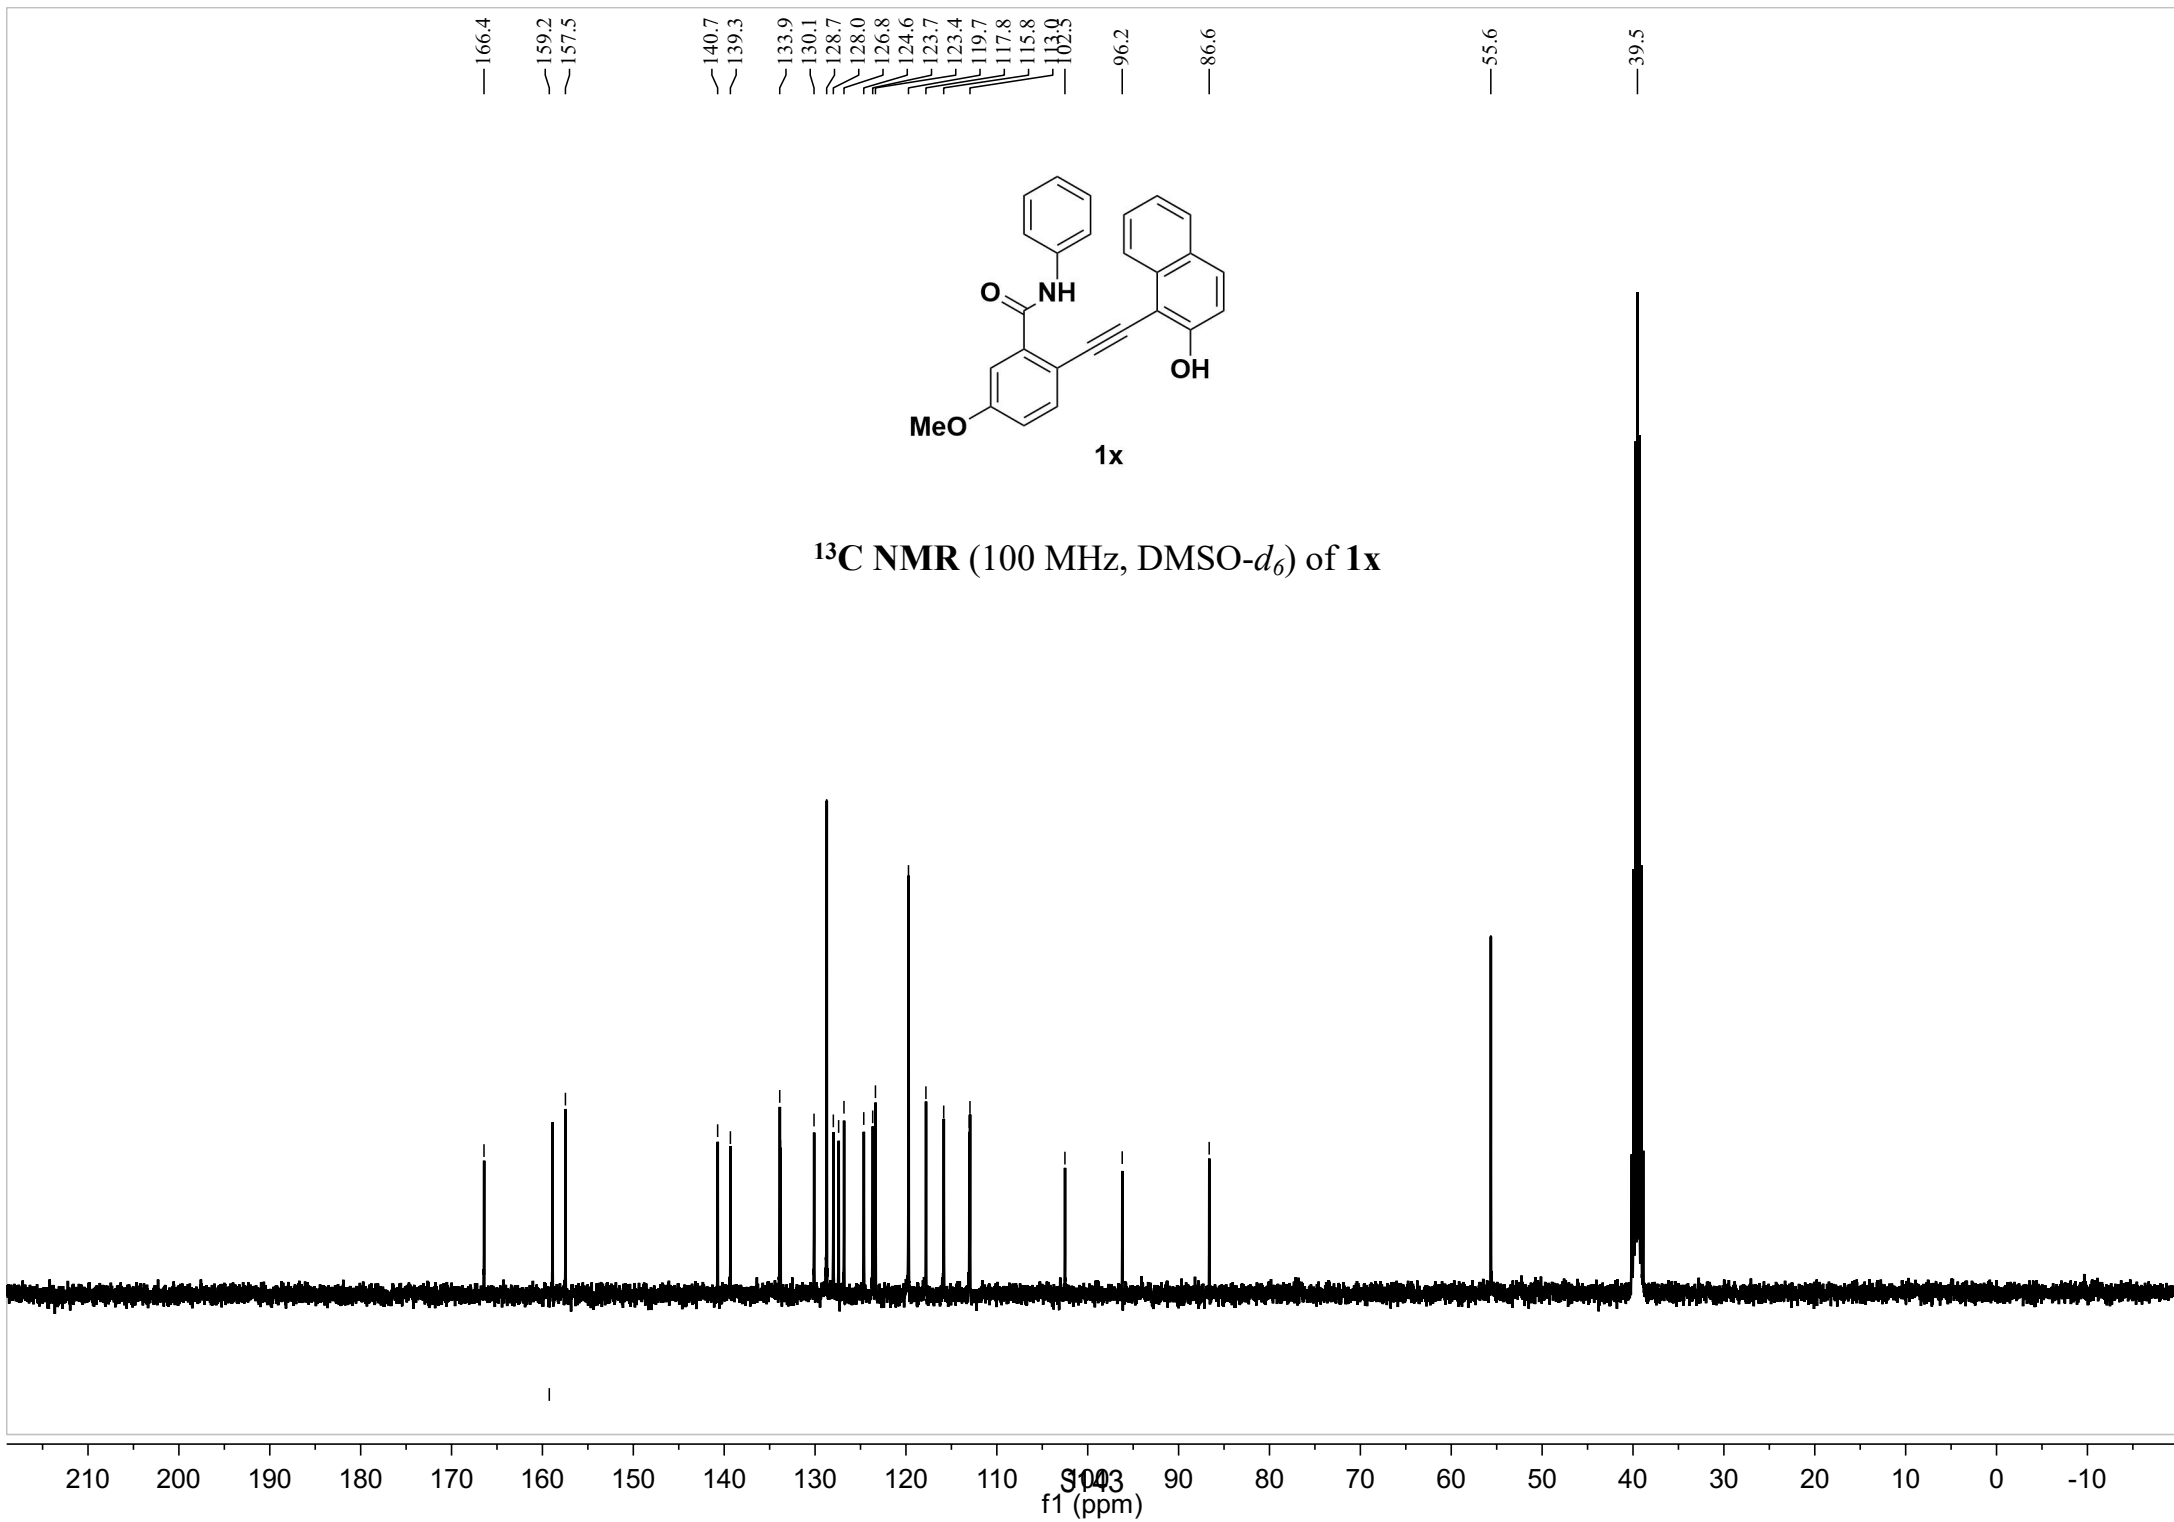

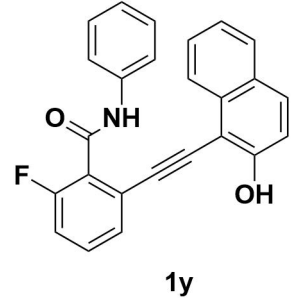

<sup>1</sup>H NMR (400 MHz, DMSO-*d*<sub>6</sub>) of **1y**

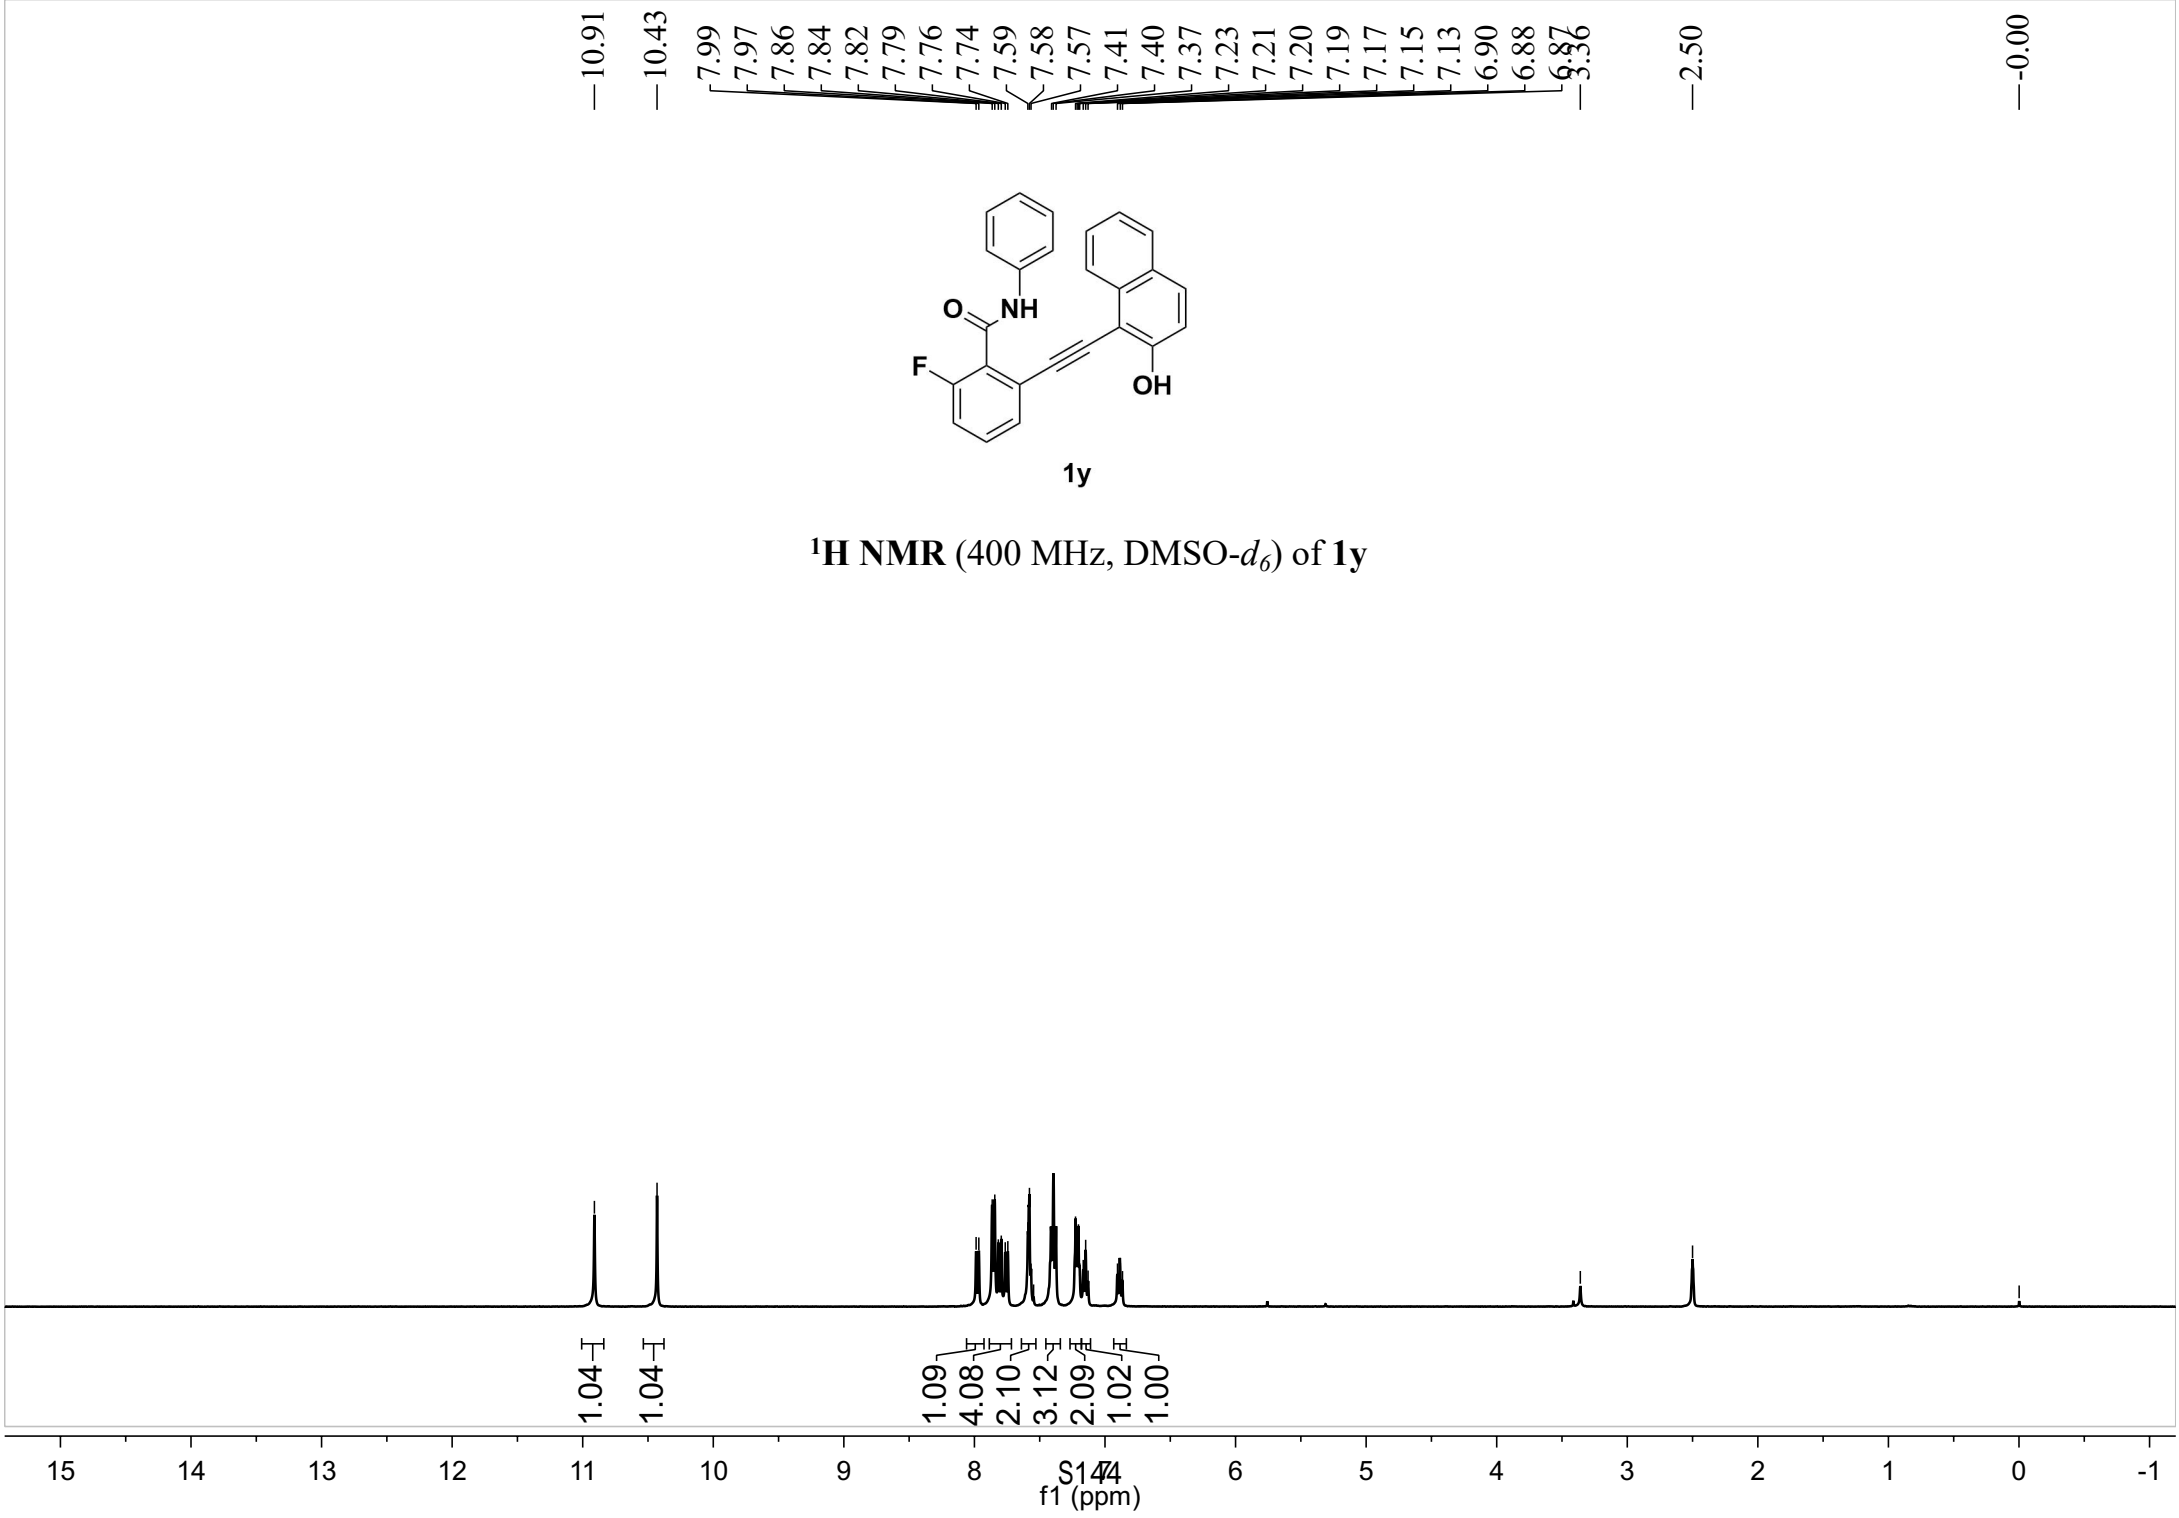



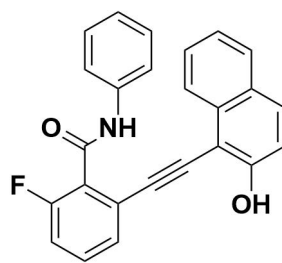

**1y**

**$^{19}\text{F}$  NMR (376 MHz,  $\text{DMSO-}d_6$ ) of **1y****

— -116.36

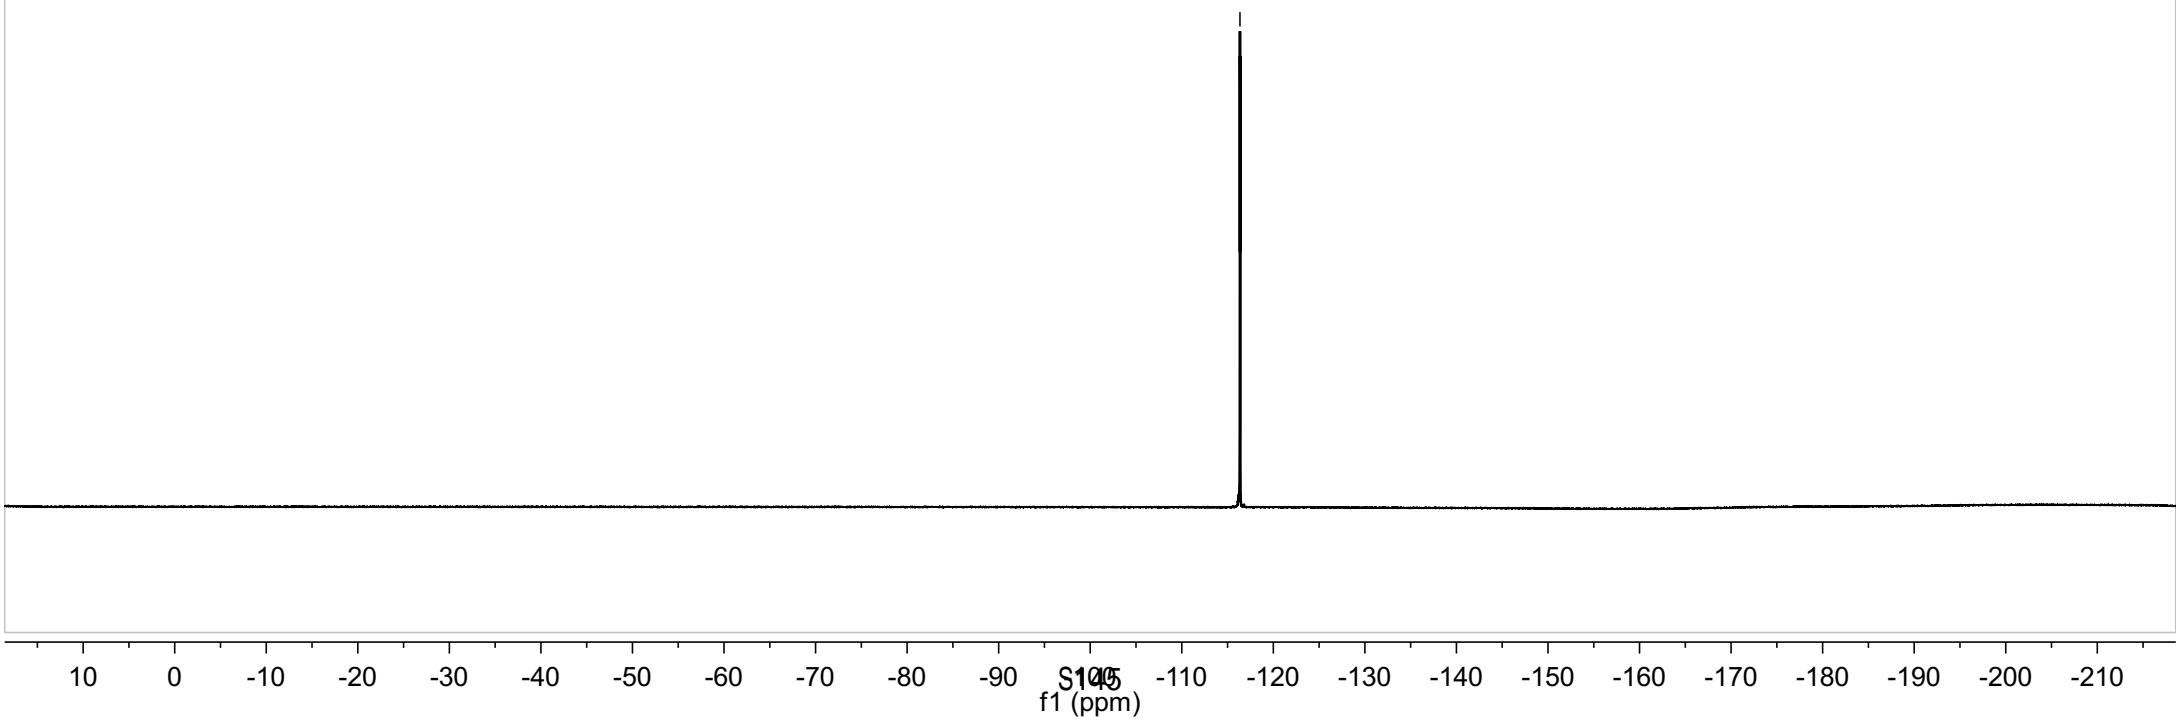

162.1  
159.4  
158.2  
157.0

139.1

133.9

131.1

131.0

128.9

128.1

127.9

127.3

127.0

124.2

123.9

123.4

119.4

101.8

94.5

94.5

89.0

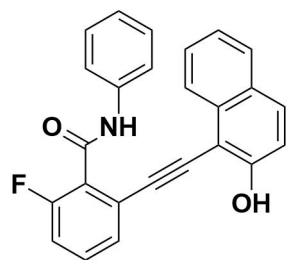

1y

<sup>13</sup>C NMR (100 MHz, DMSO-d<sub>6</sub>) of 1y

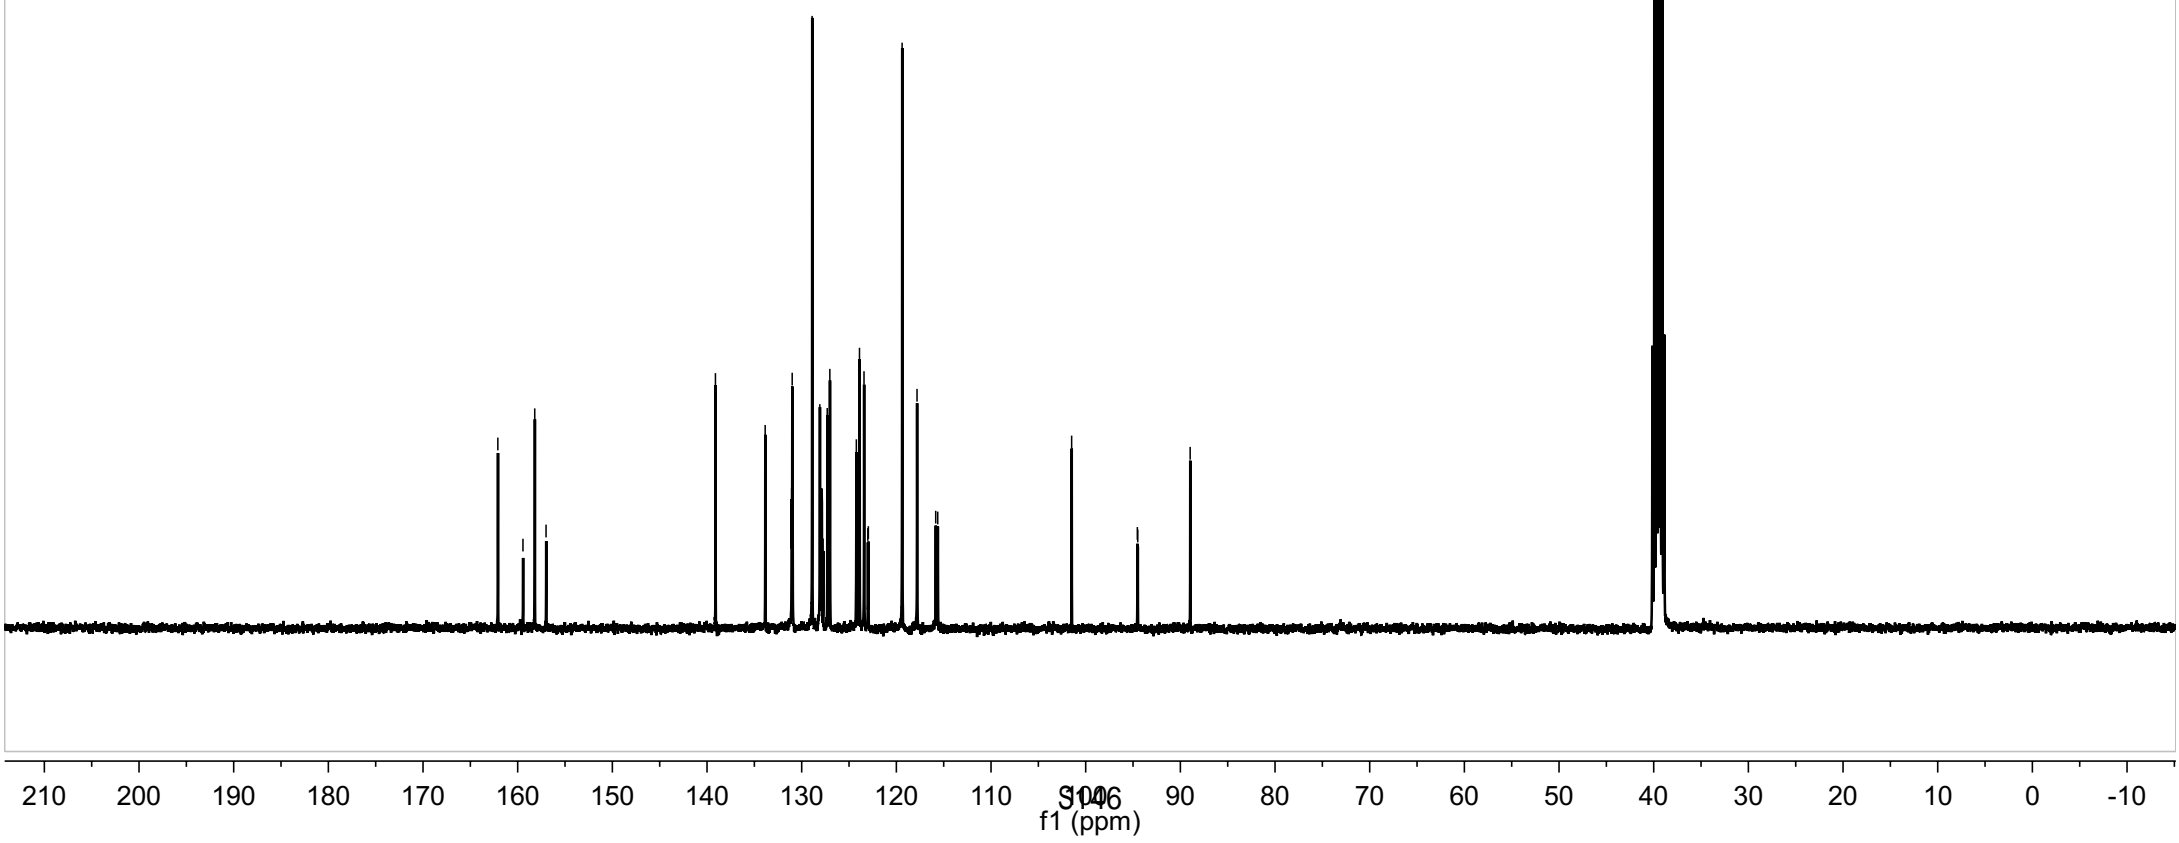

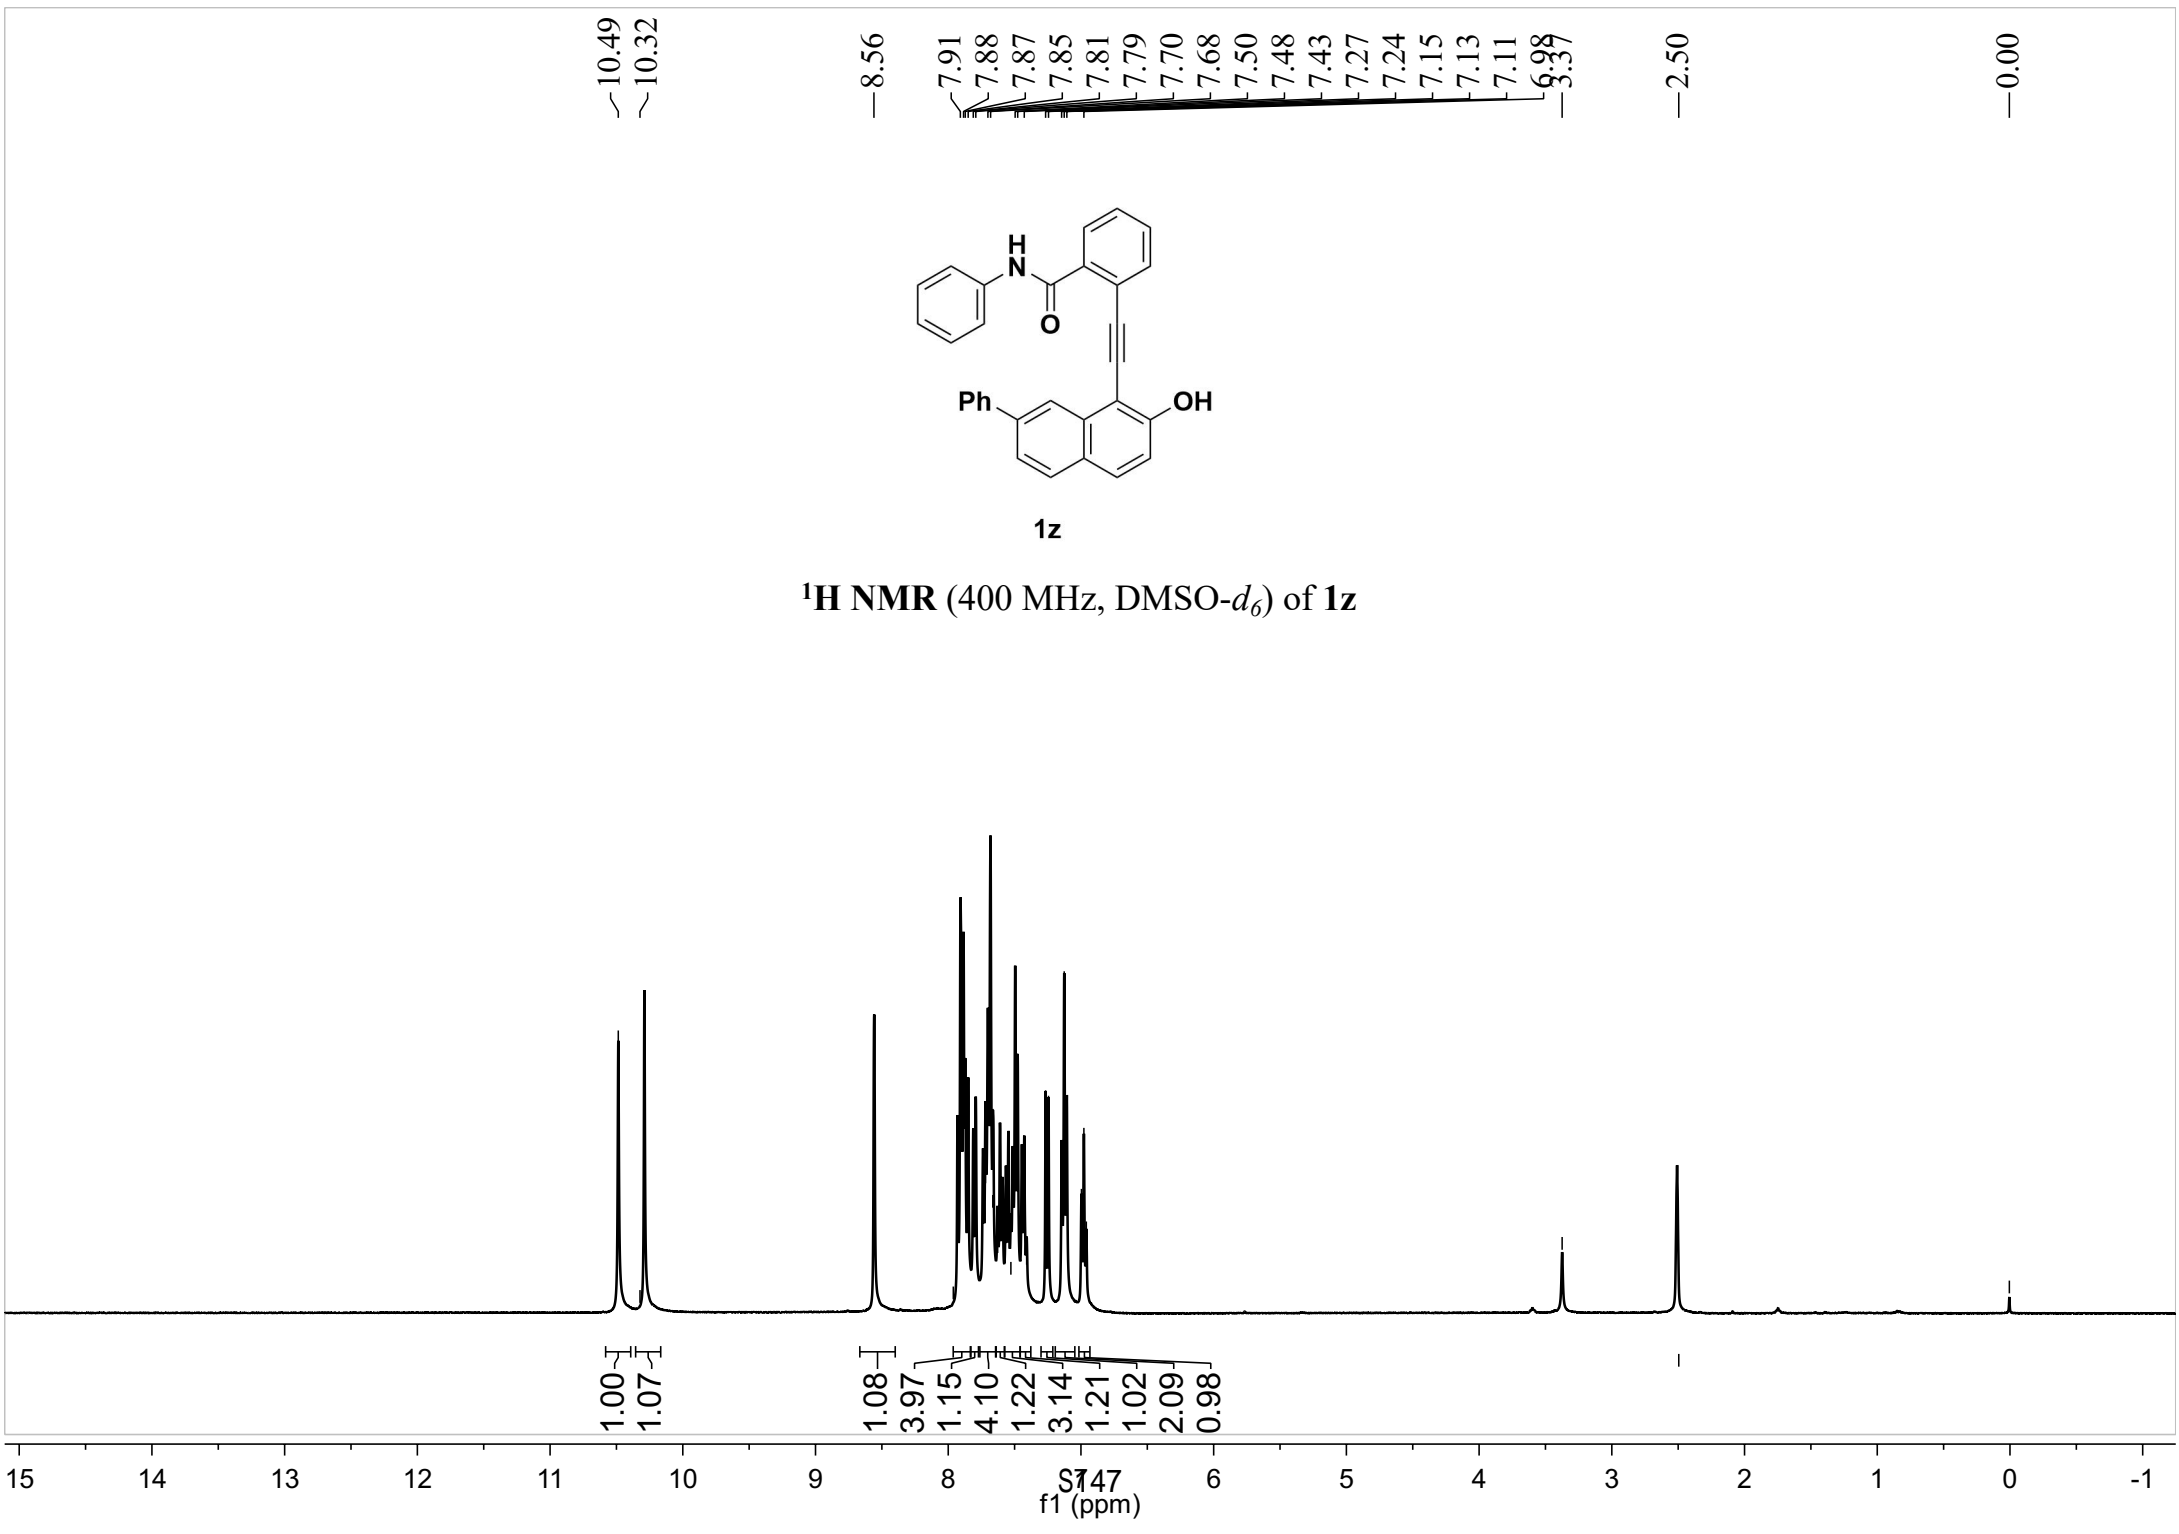

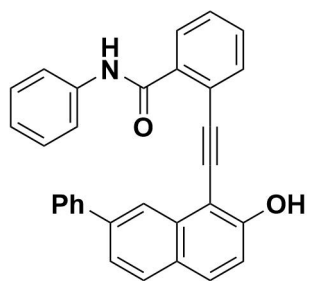

1z

<sup>13</sup>C NMR (100 MHz, DMSO-*d*<sub>6</sub>) of 1z

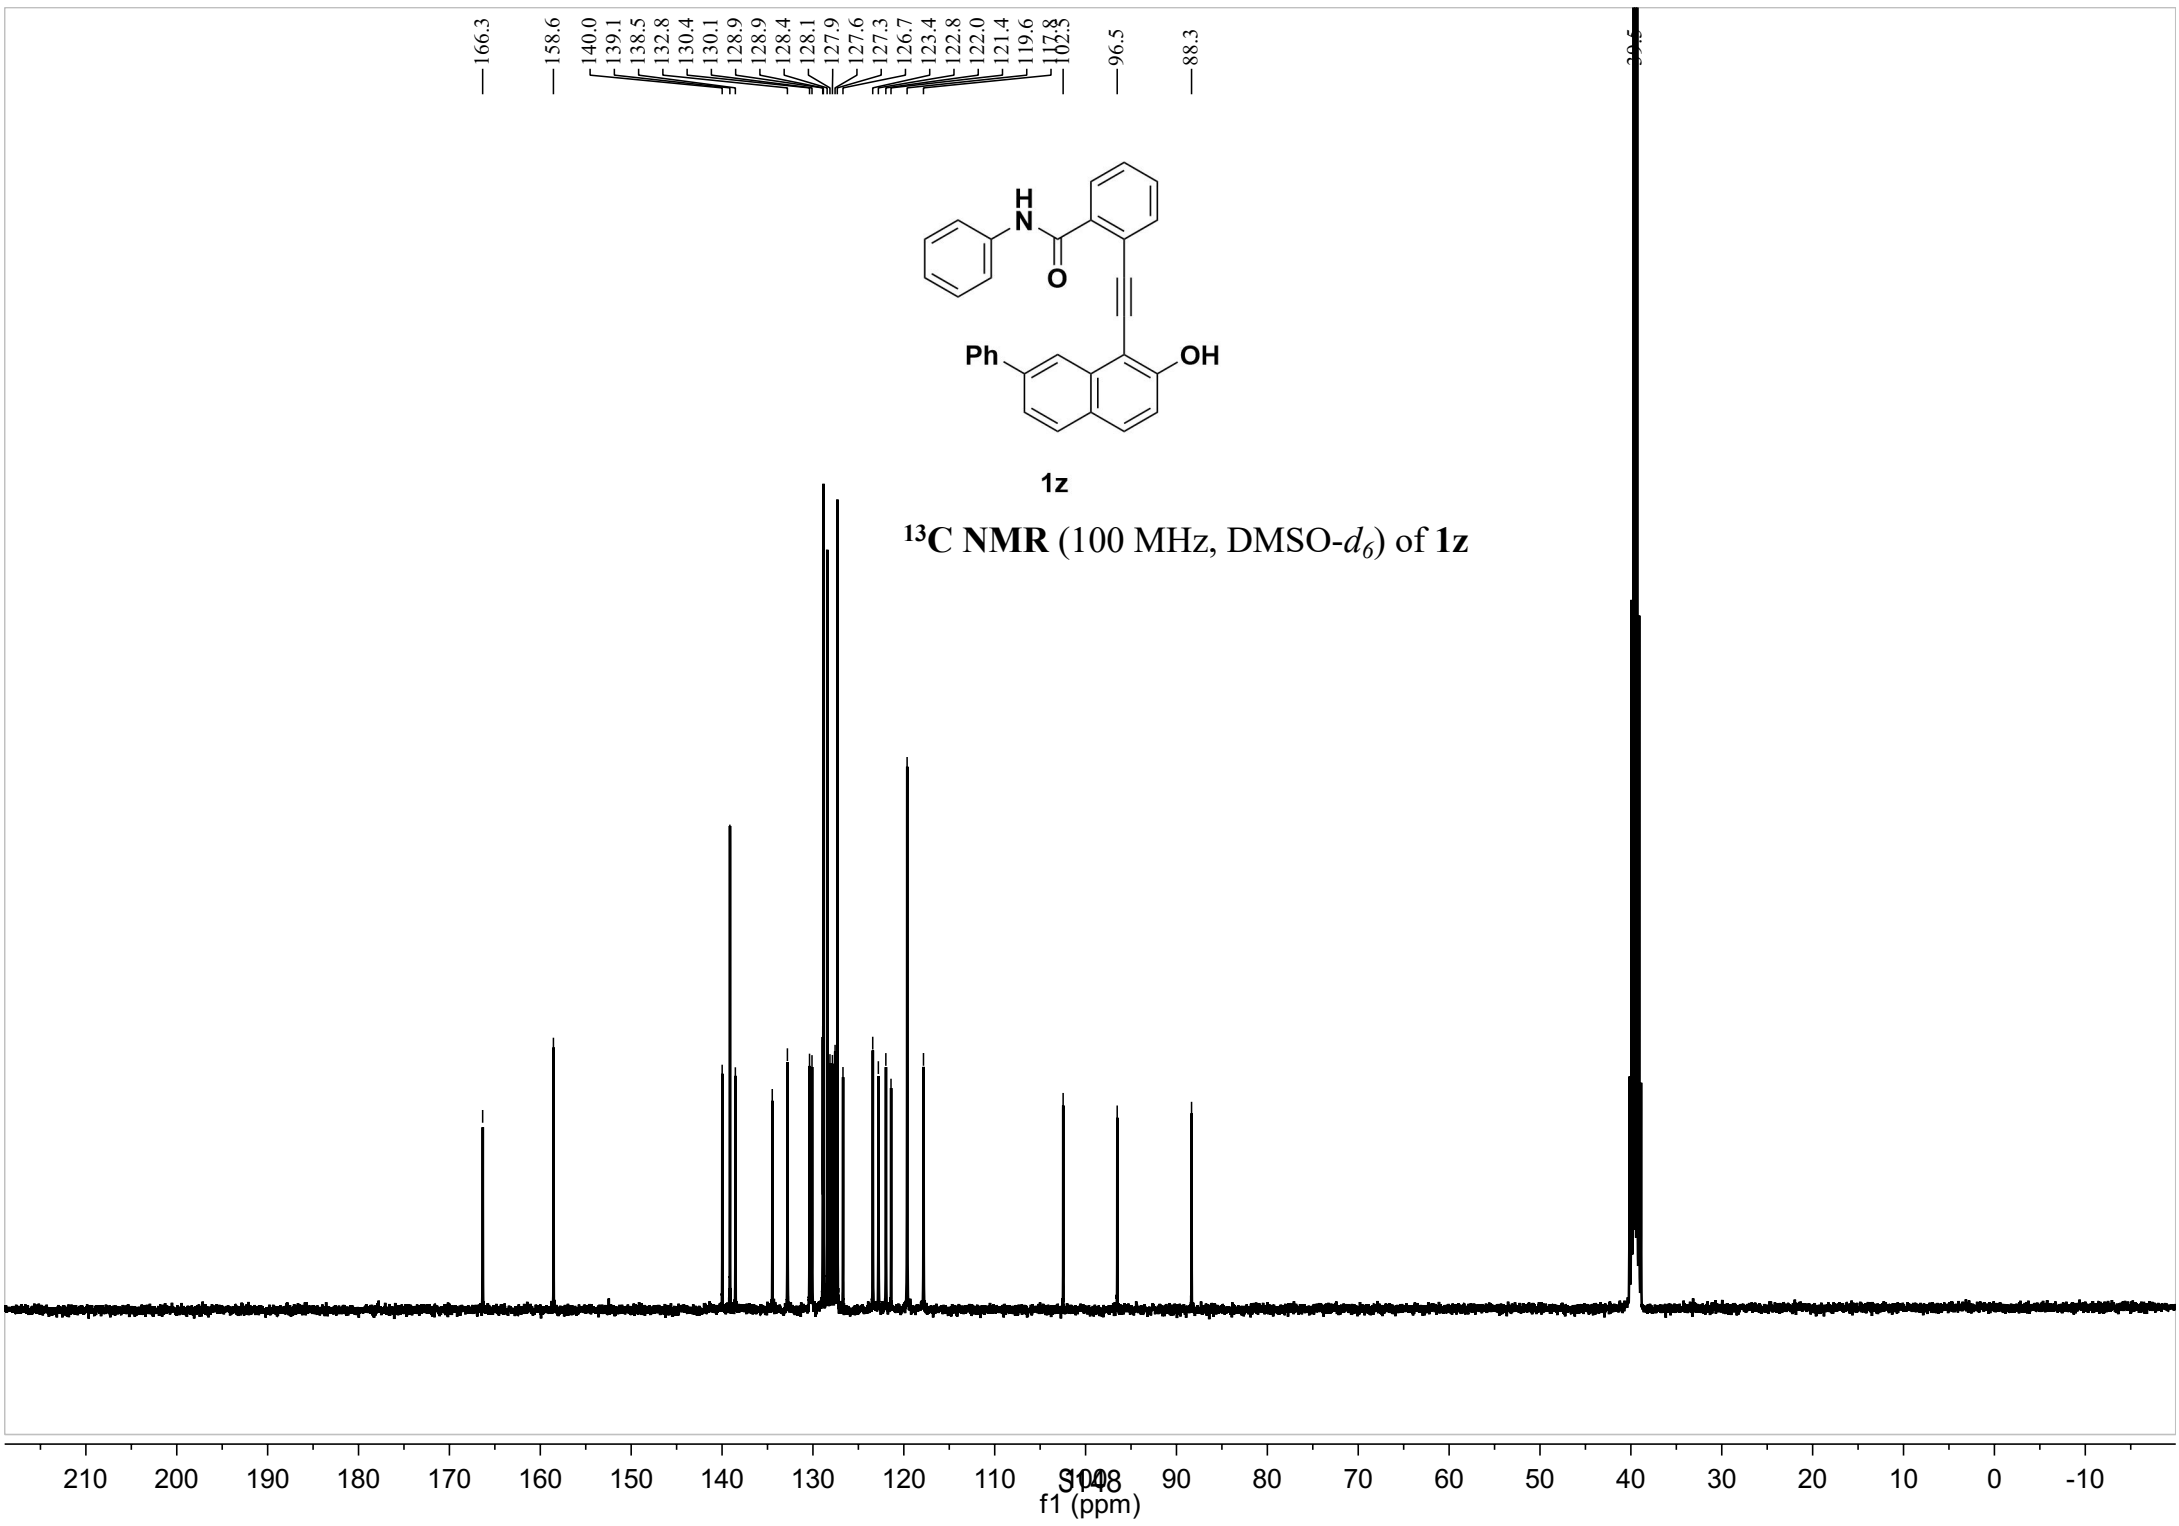

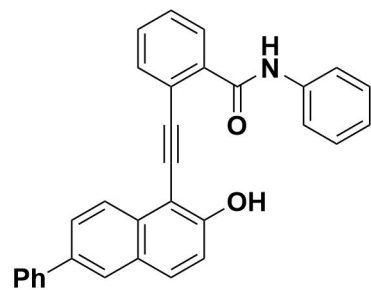

**1aa**

**<sup>1</sup>H NMR (400 MHz, DMSO-*d*<sub>6</sub>) of 1aa**

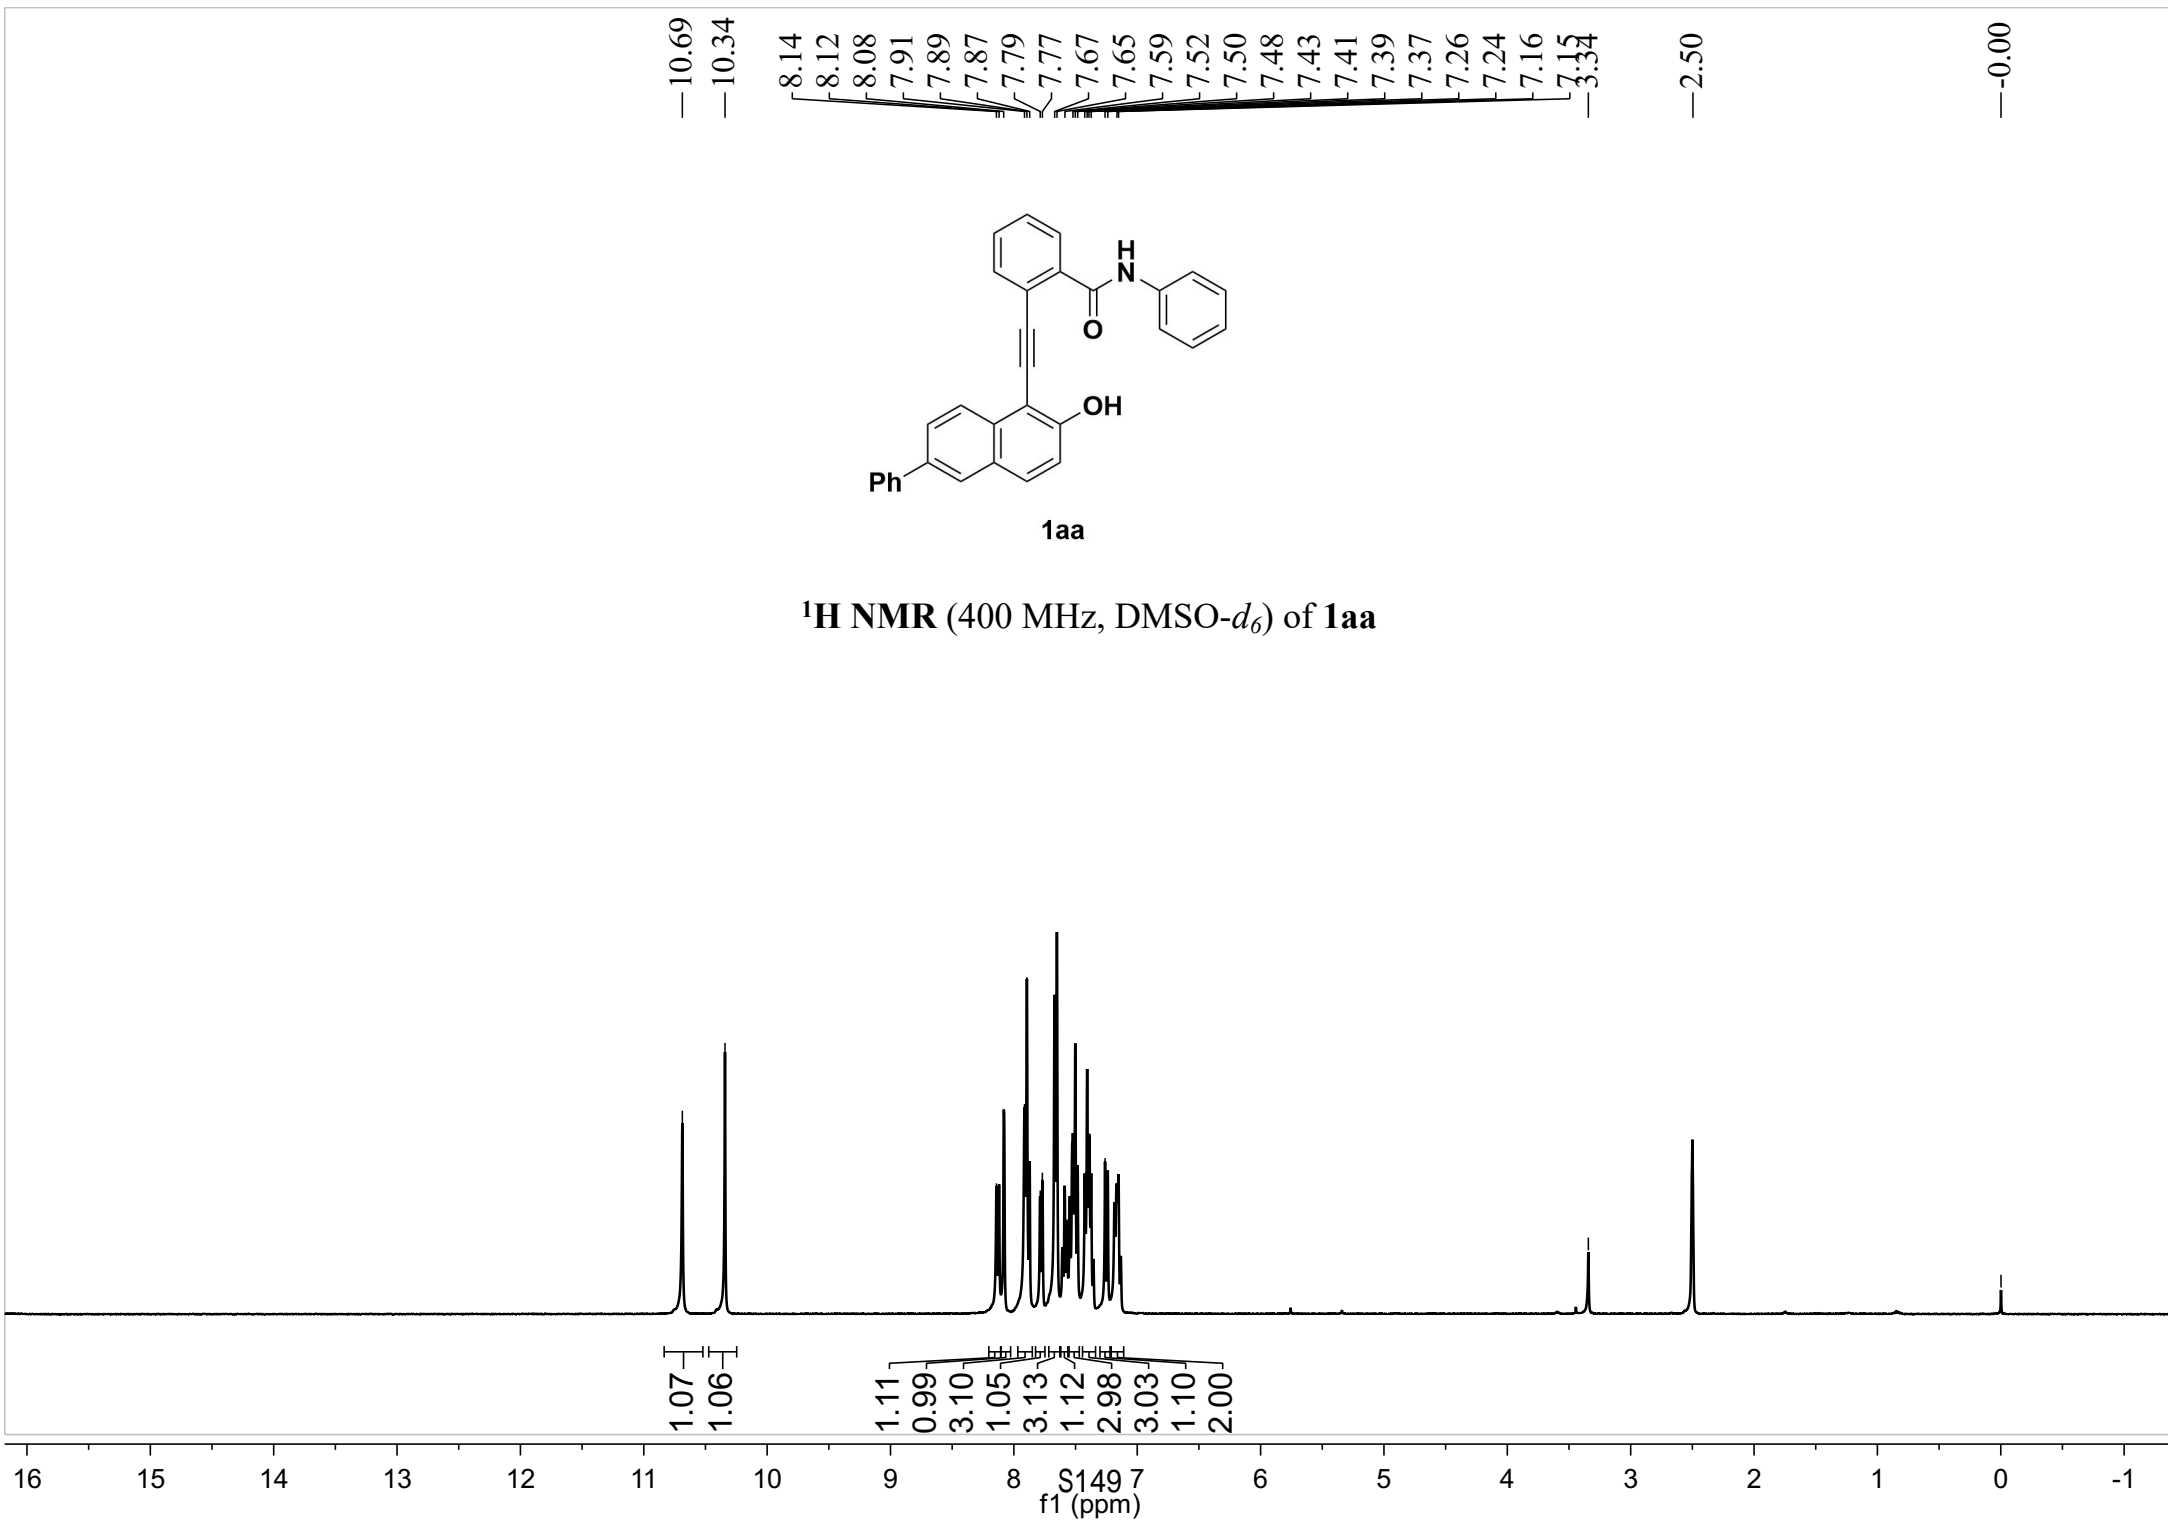

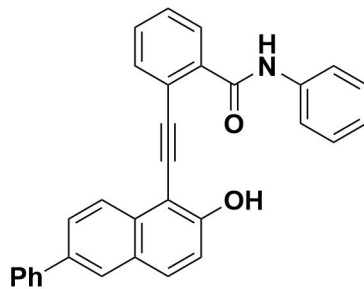

1aa

$^{13}\text{C}$  NMR (100 MHz,  $\text{DMSO-}d_6$ ) of 1aa

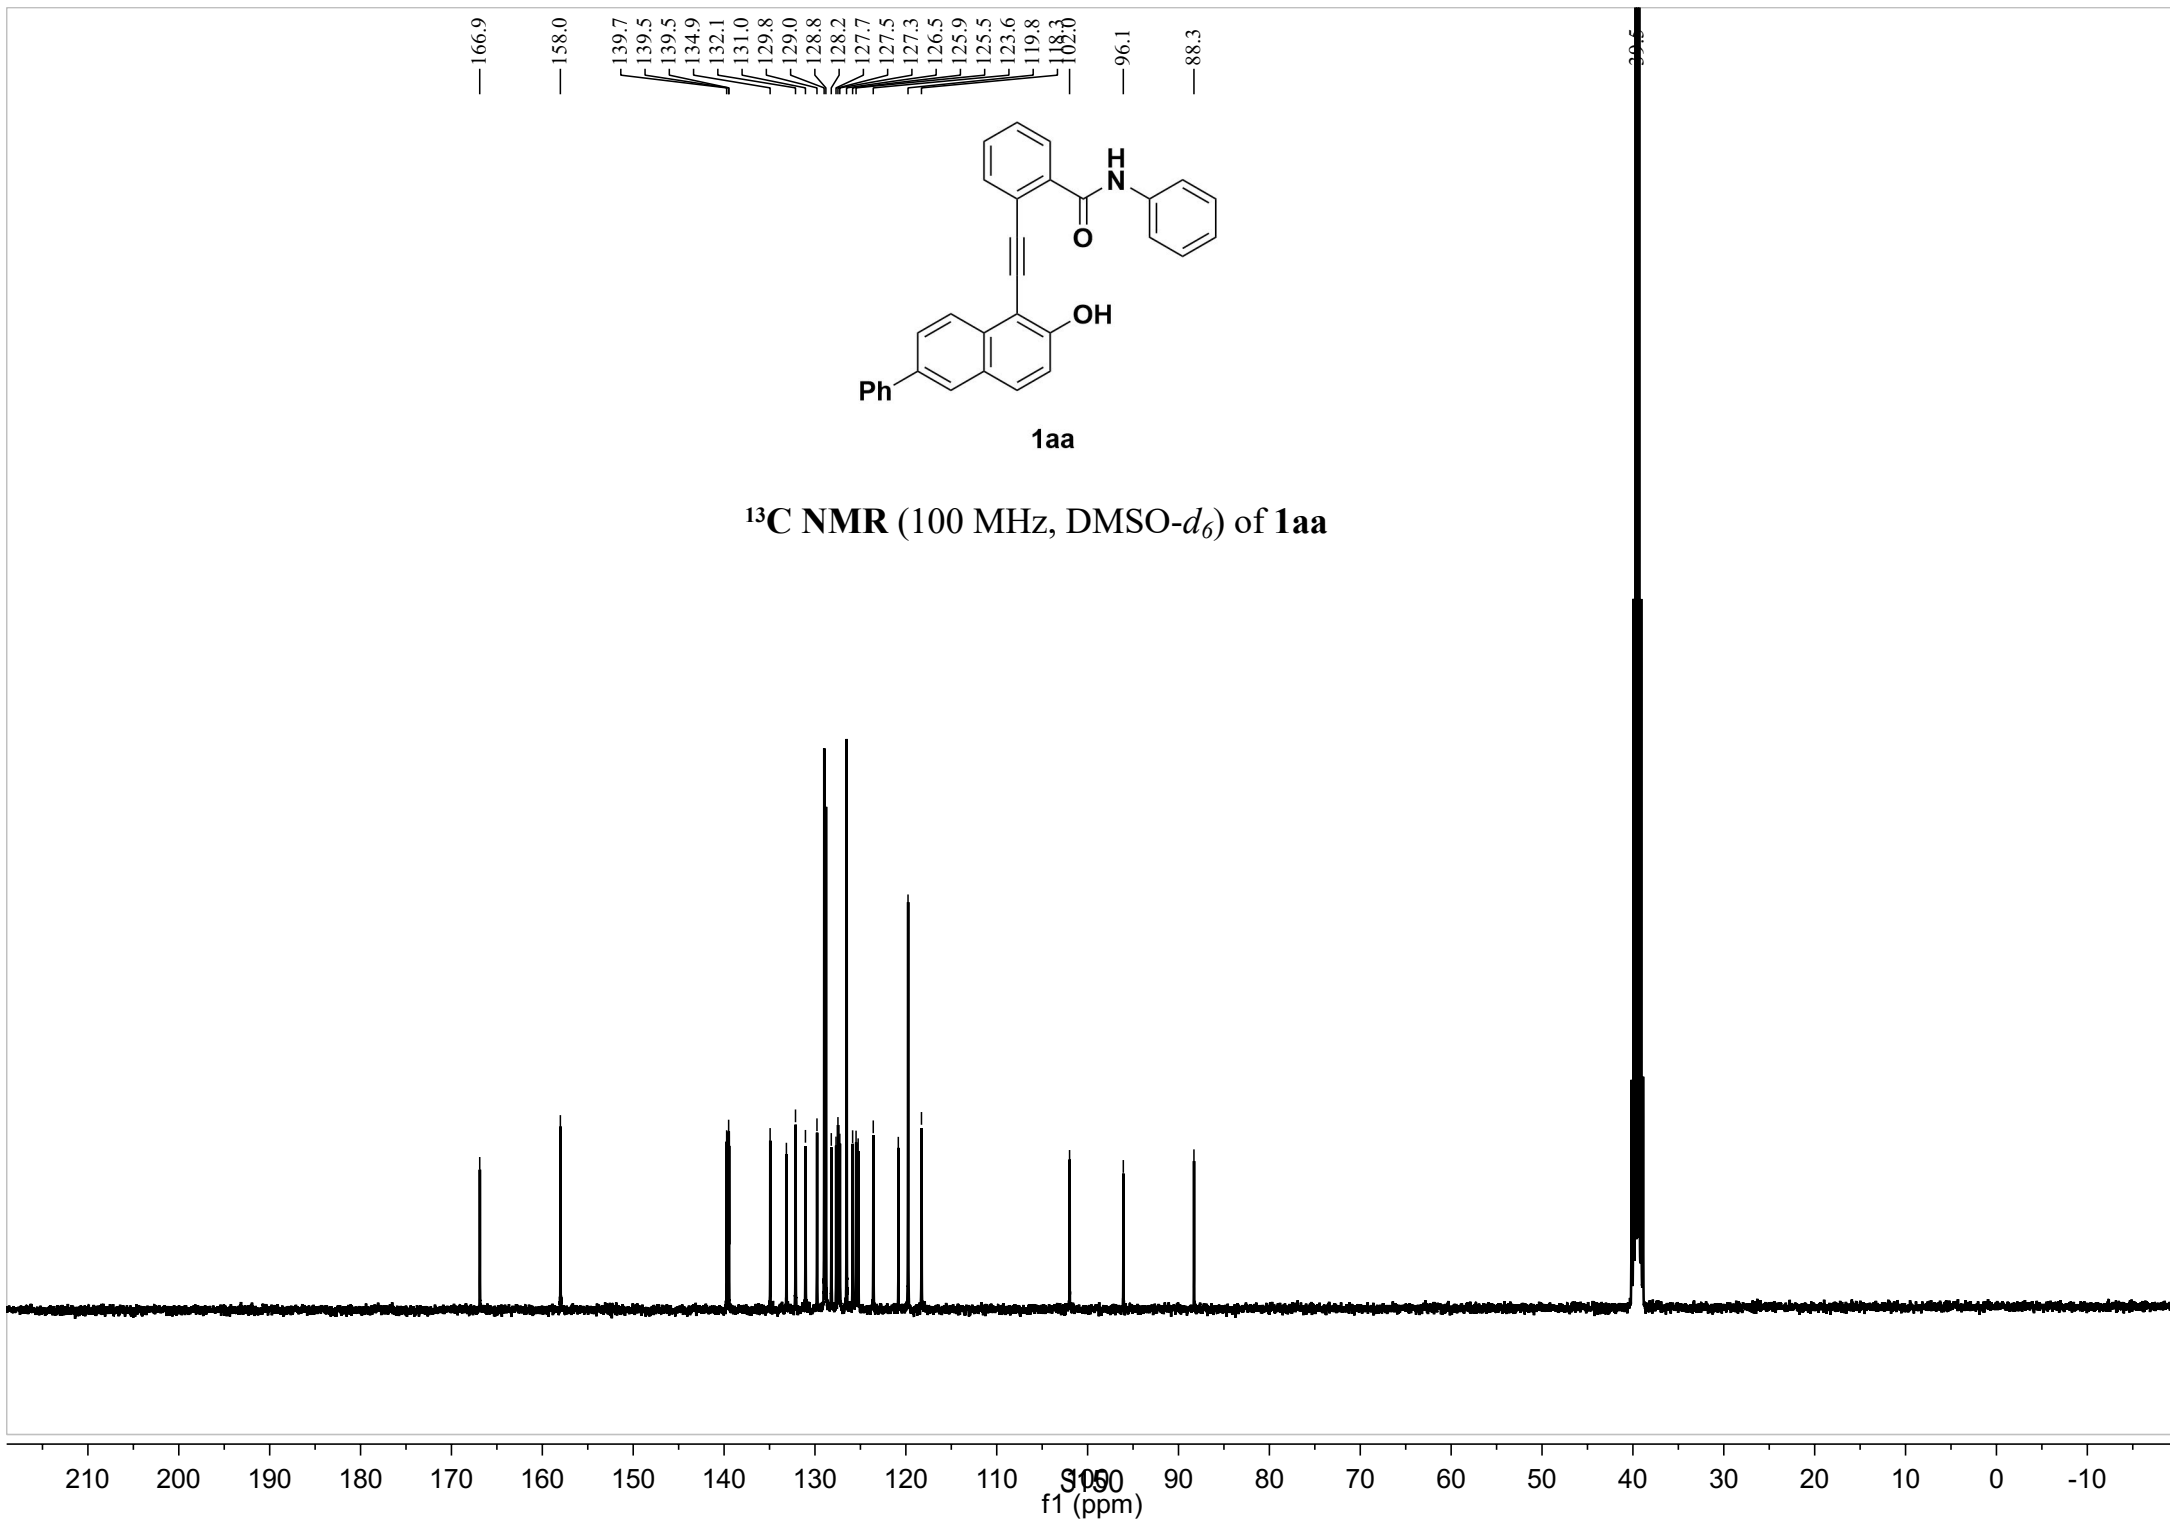

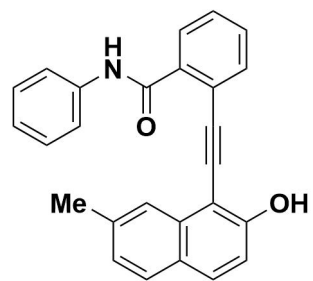

**1ab**

**<sup>1</sup>H NMR (400 MHz, DMSO-*d*<sub>6</sub>) of **1ab****

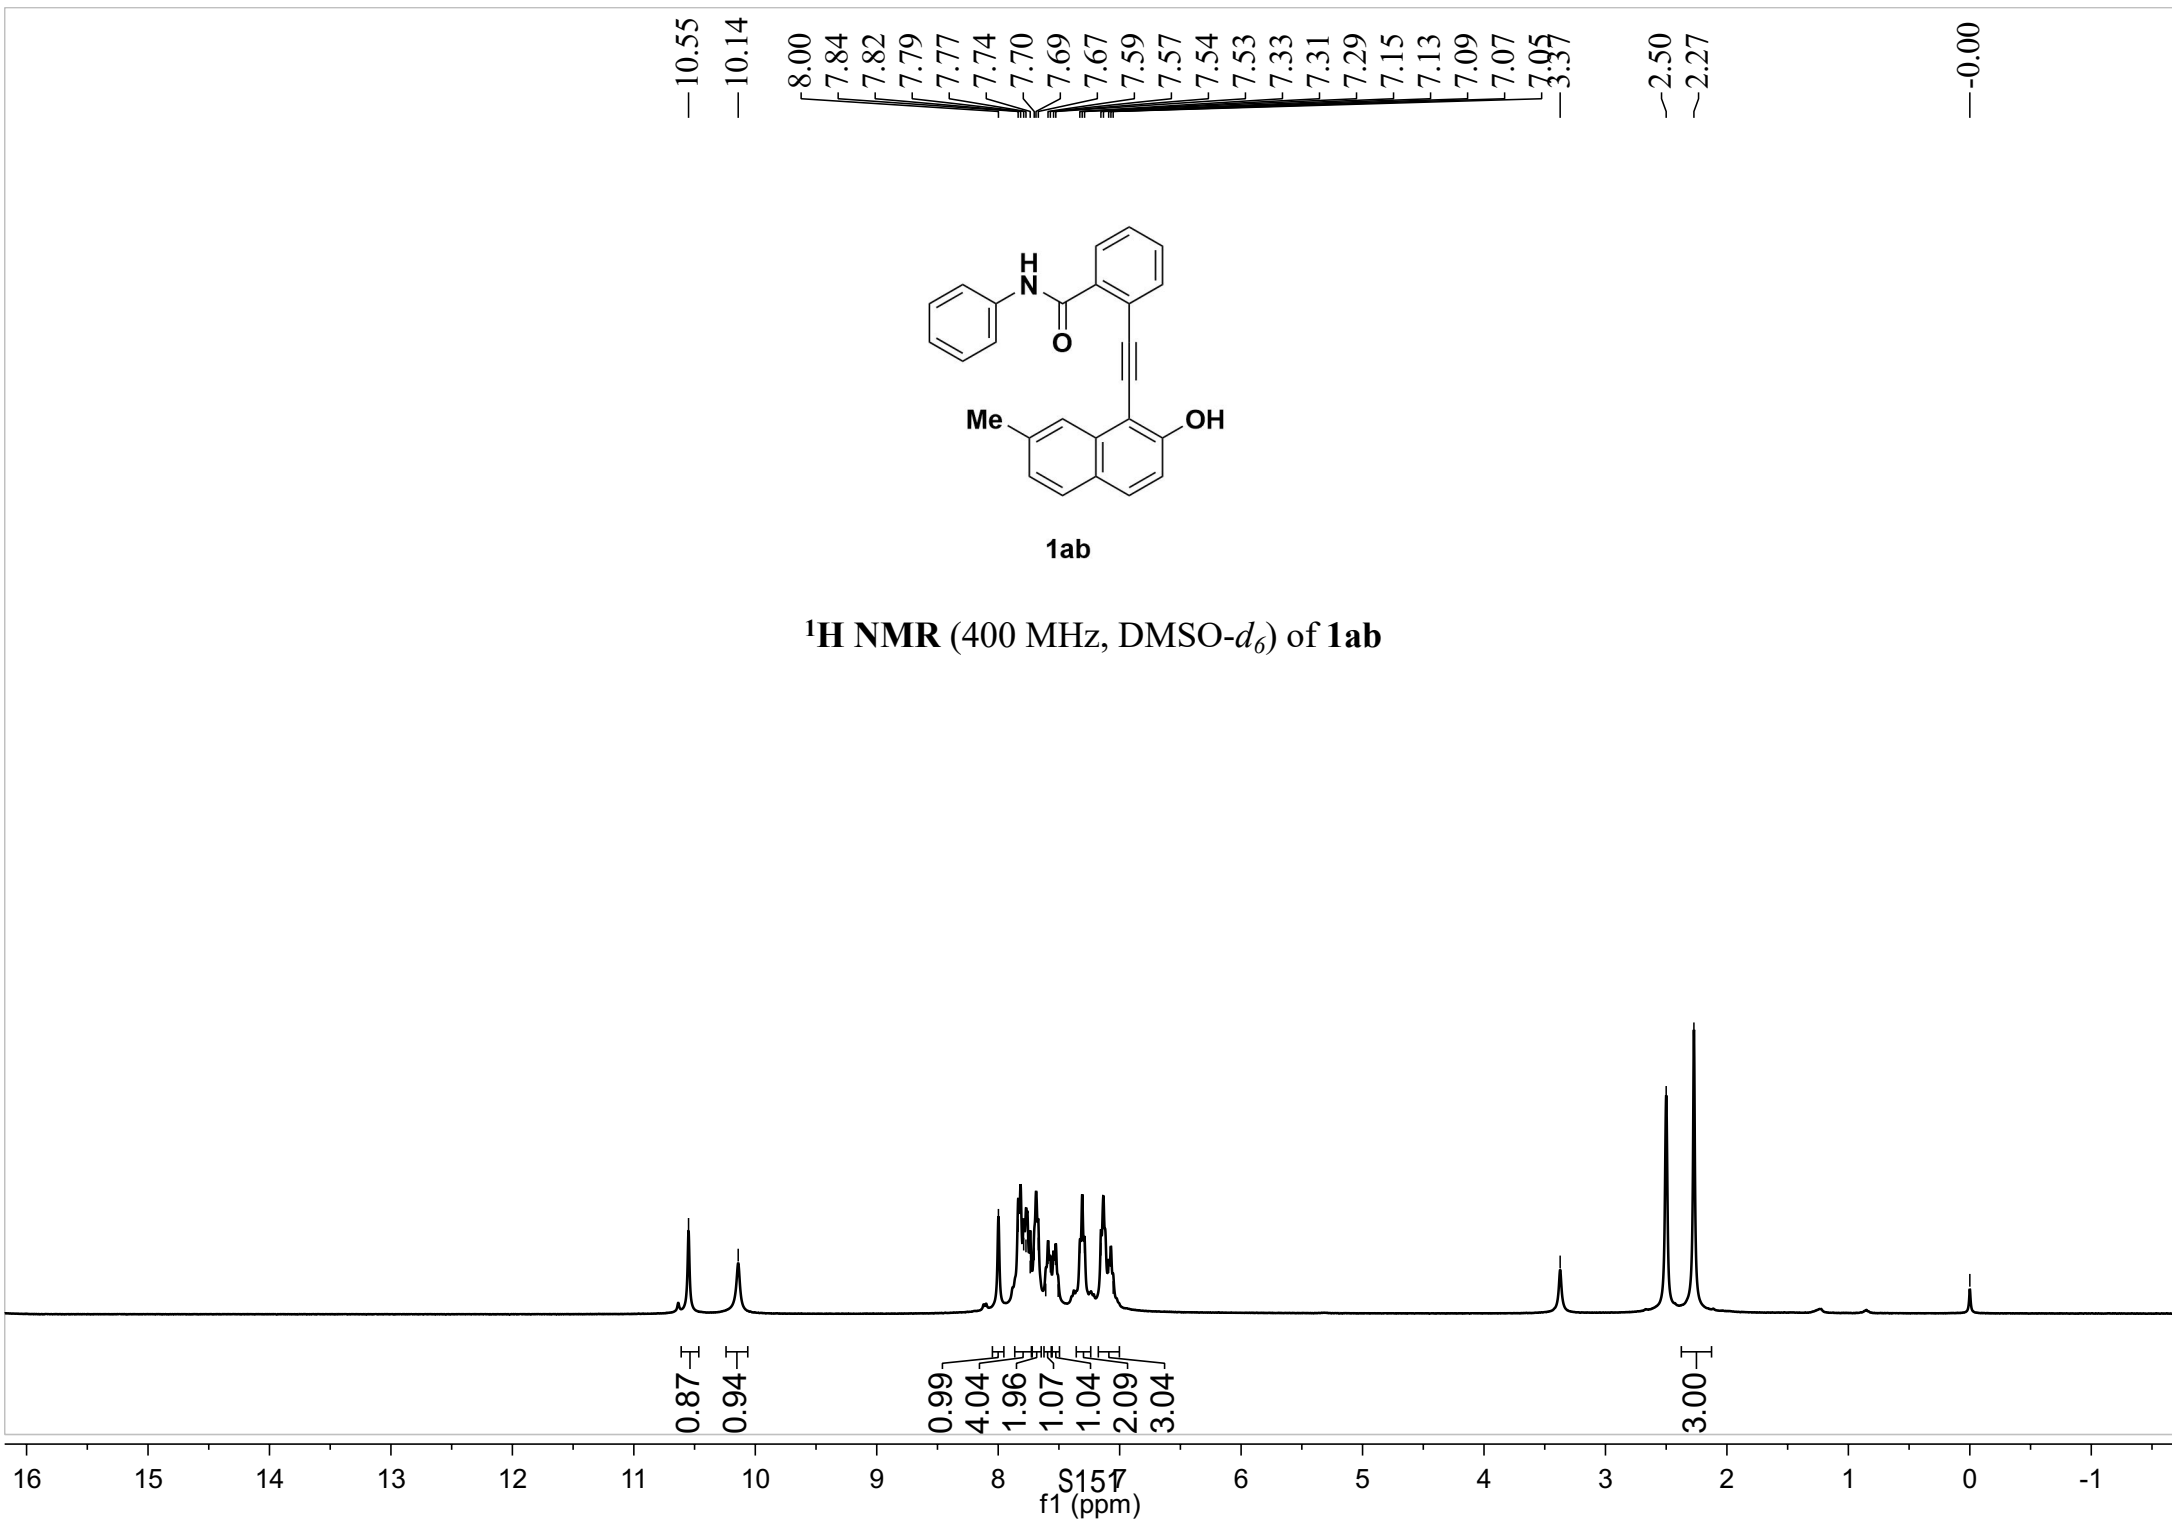

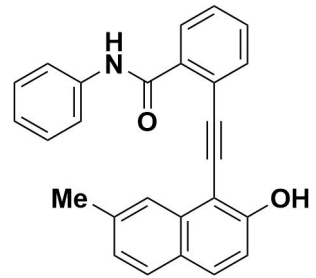

1ab

<sup>13</sup>C NMR (100 MHz, DMSO-*d*<sub>6</sub>) of 1ab

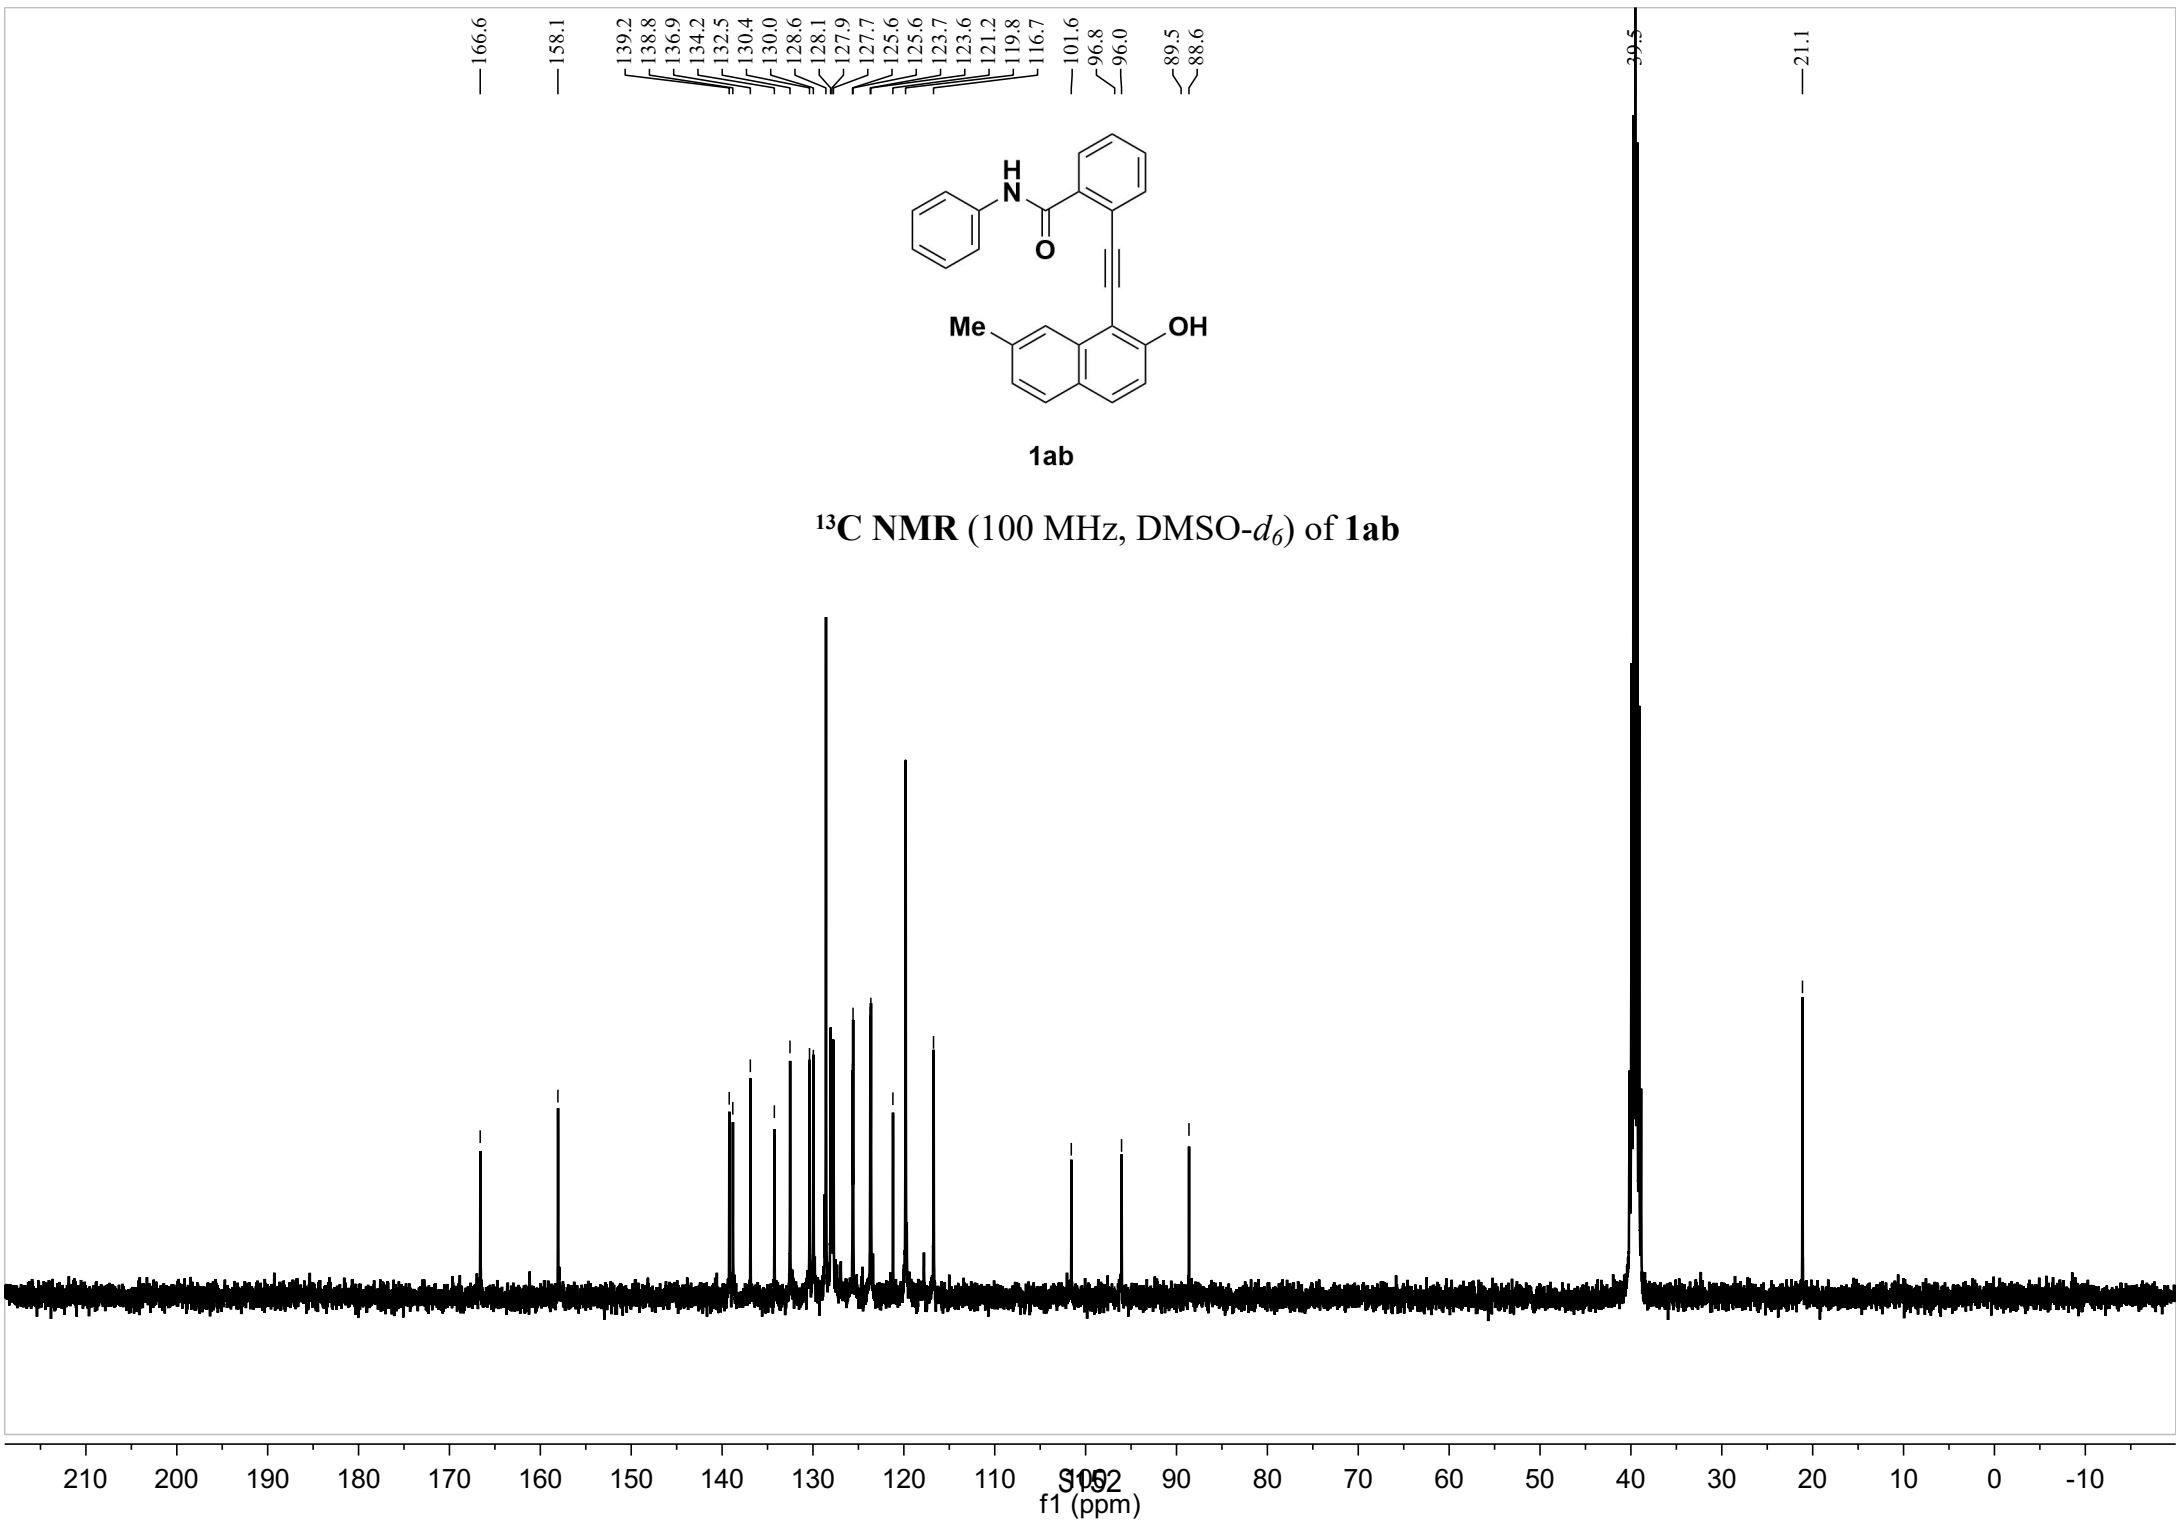



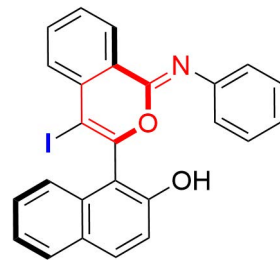

3a

$^1\text{H NMR}$  (400 MHz, Acetone- $d_6$ ) of 3a

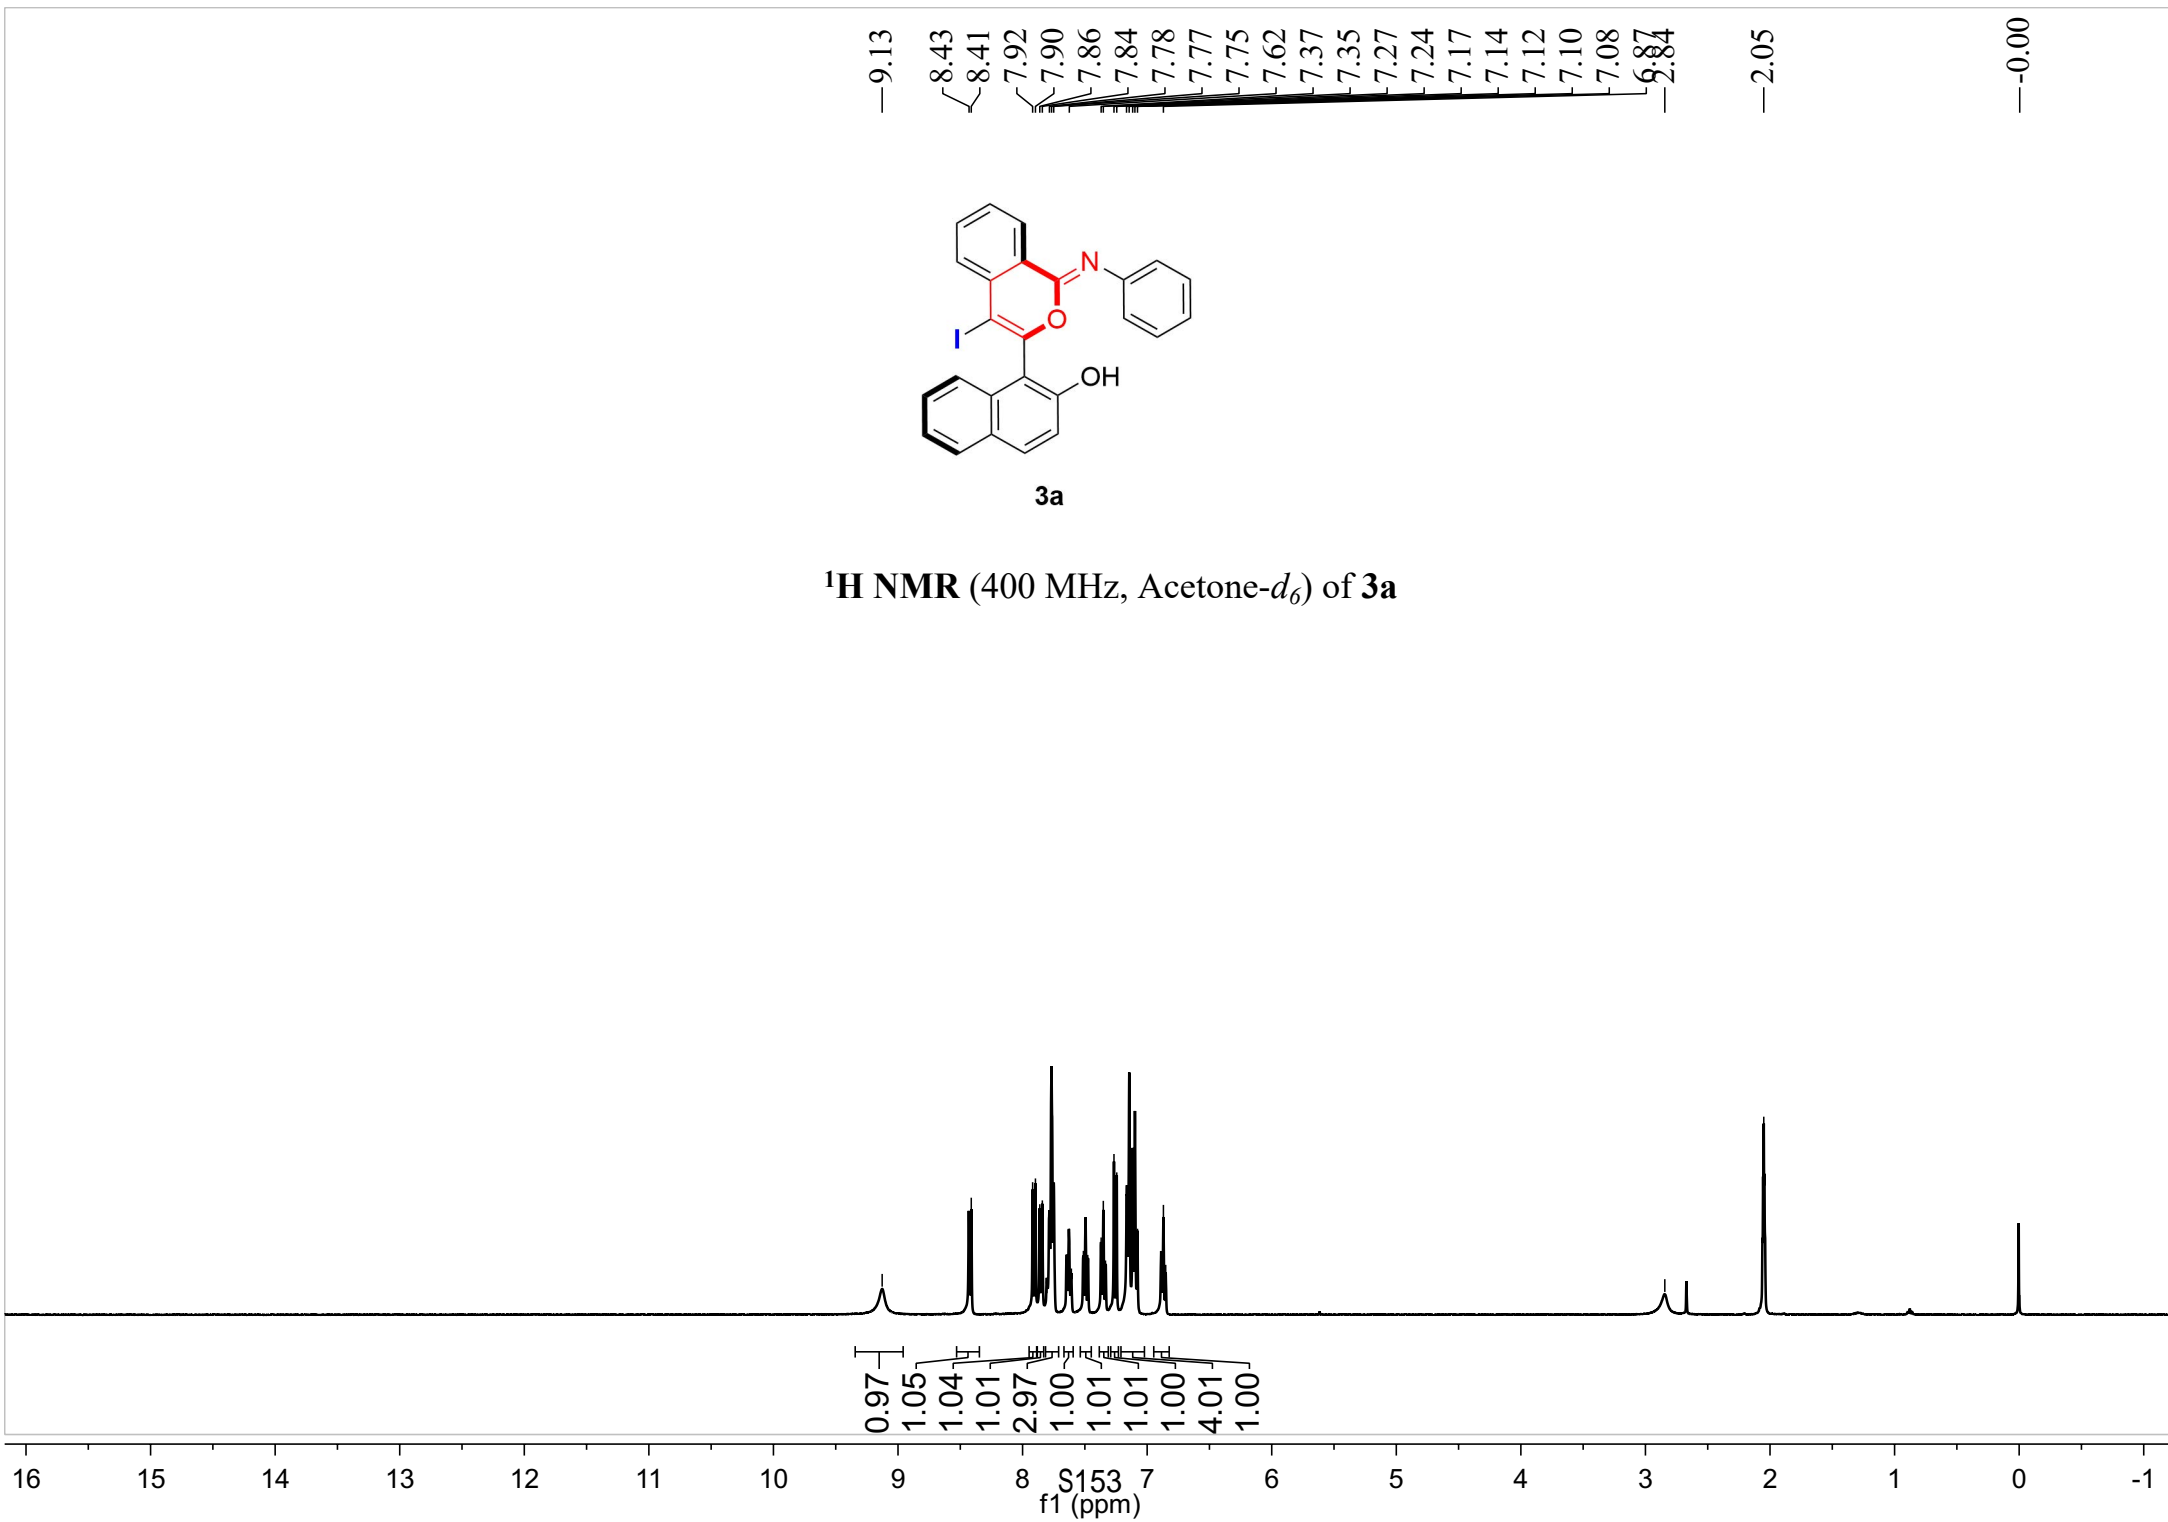

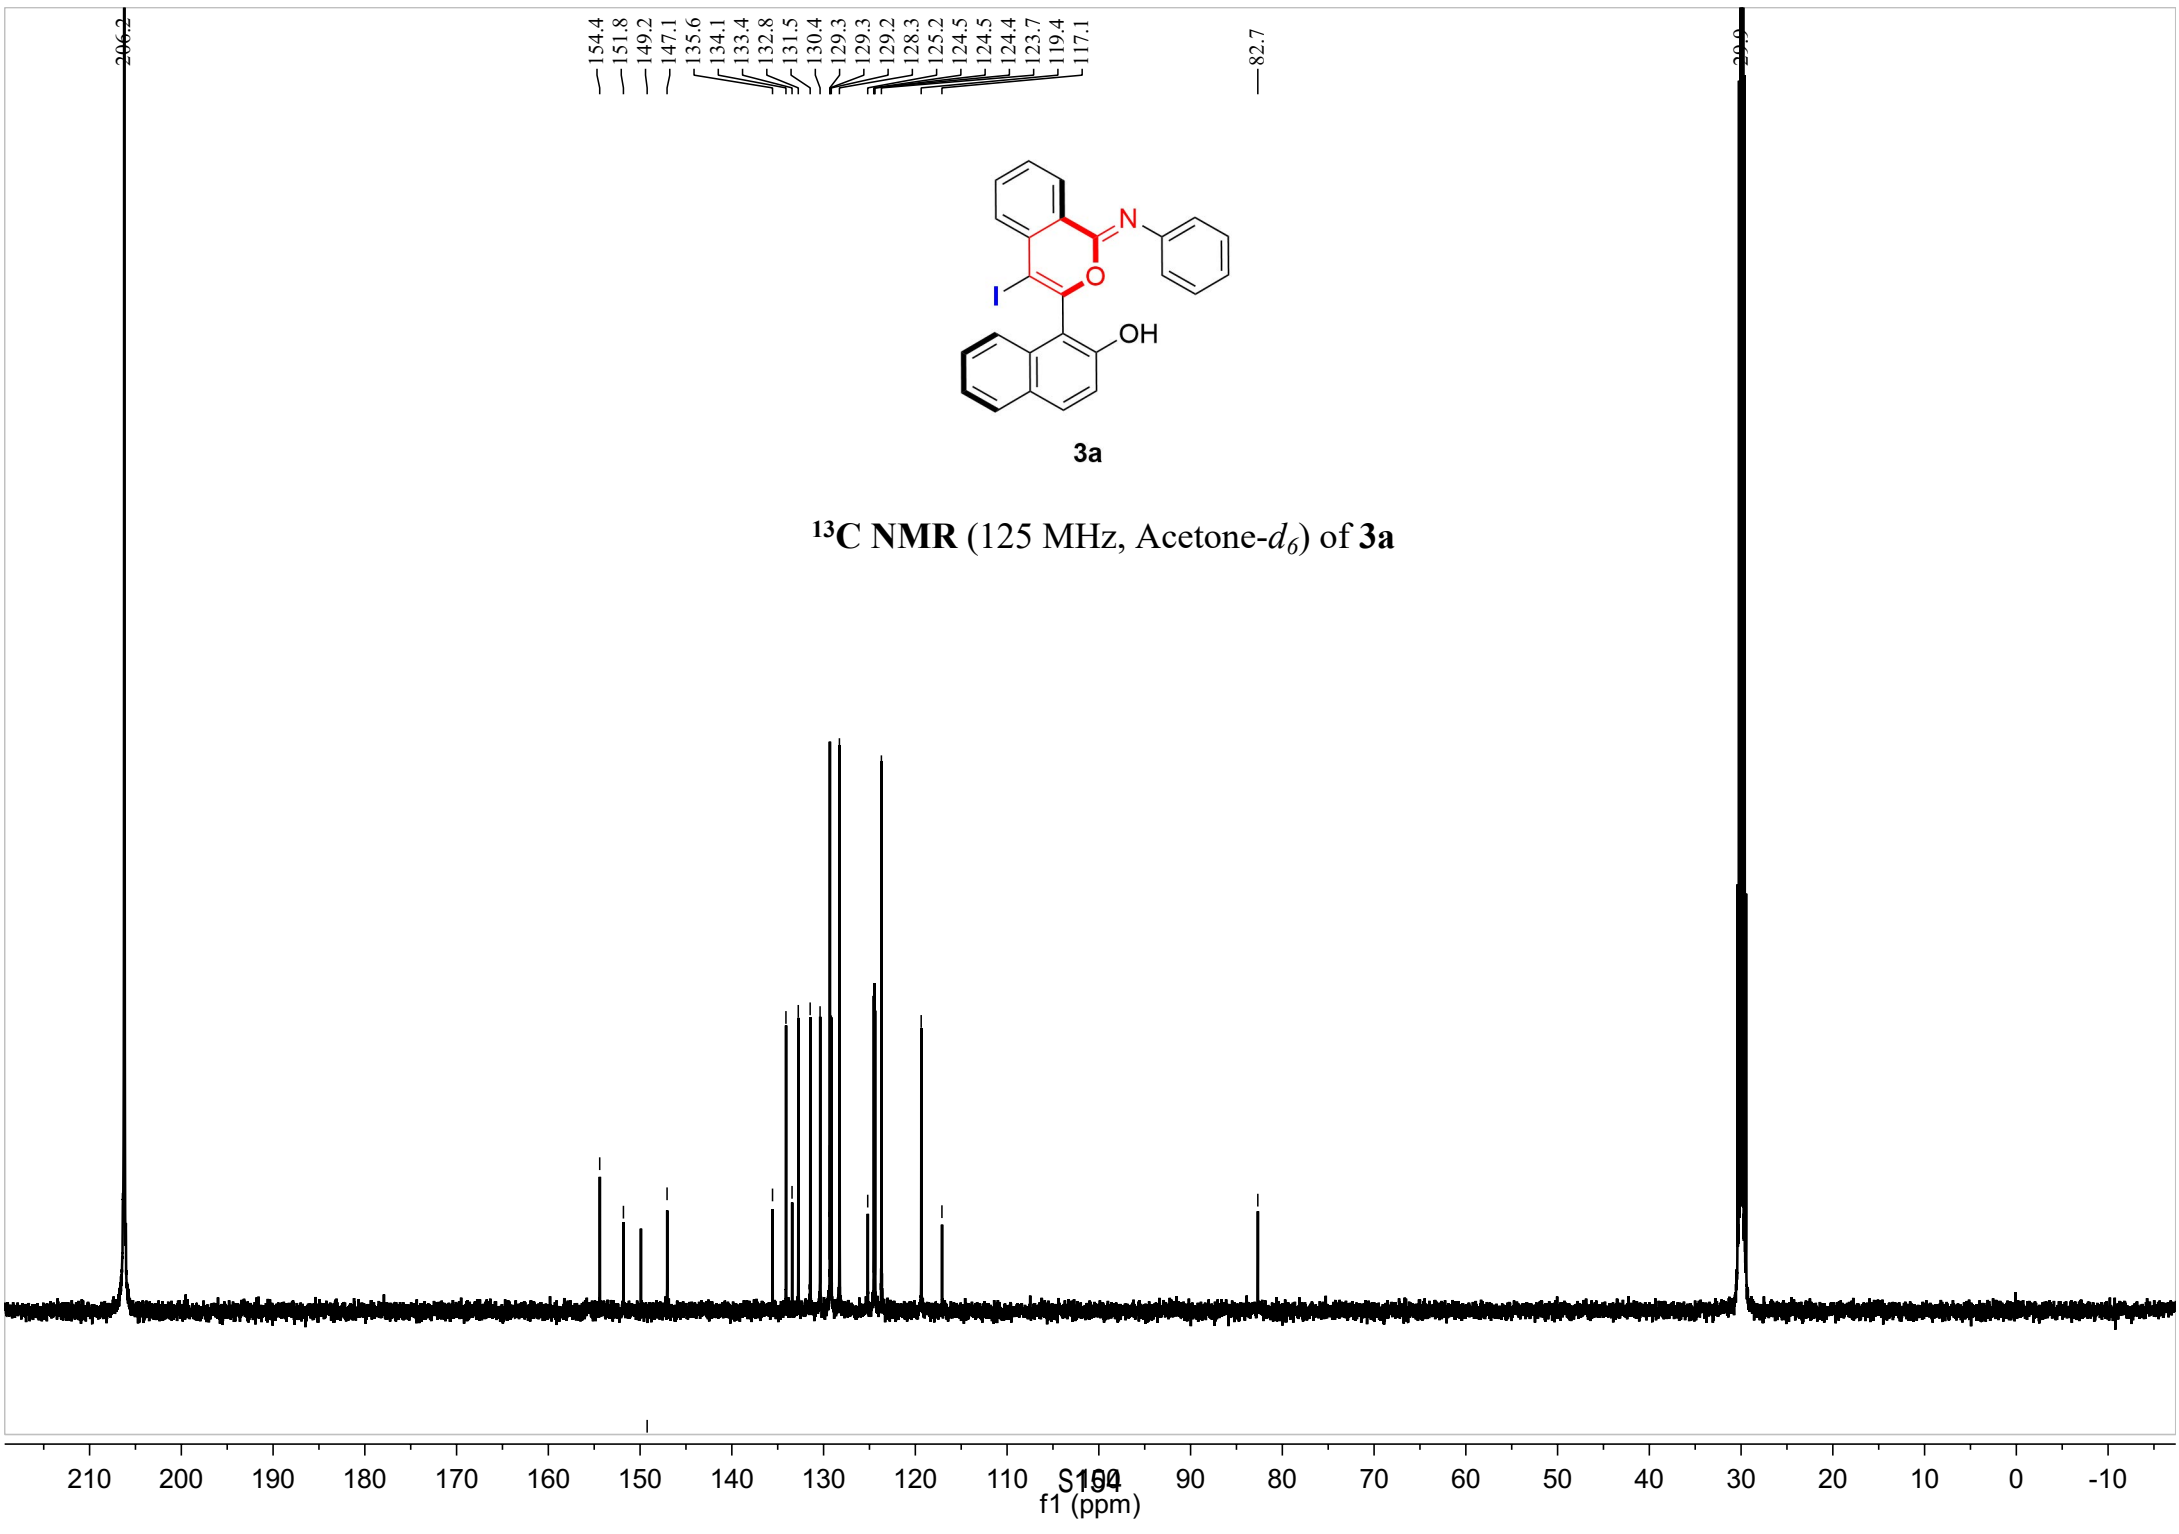

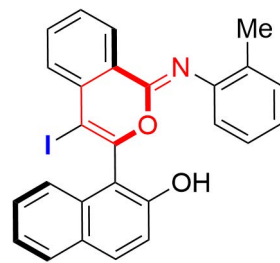

**3b**

**<sup>1</sup>H NMR (400 MHz, Acetone-*d*<sub>6</sub>) of 3b**

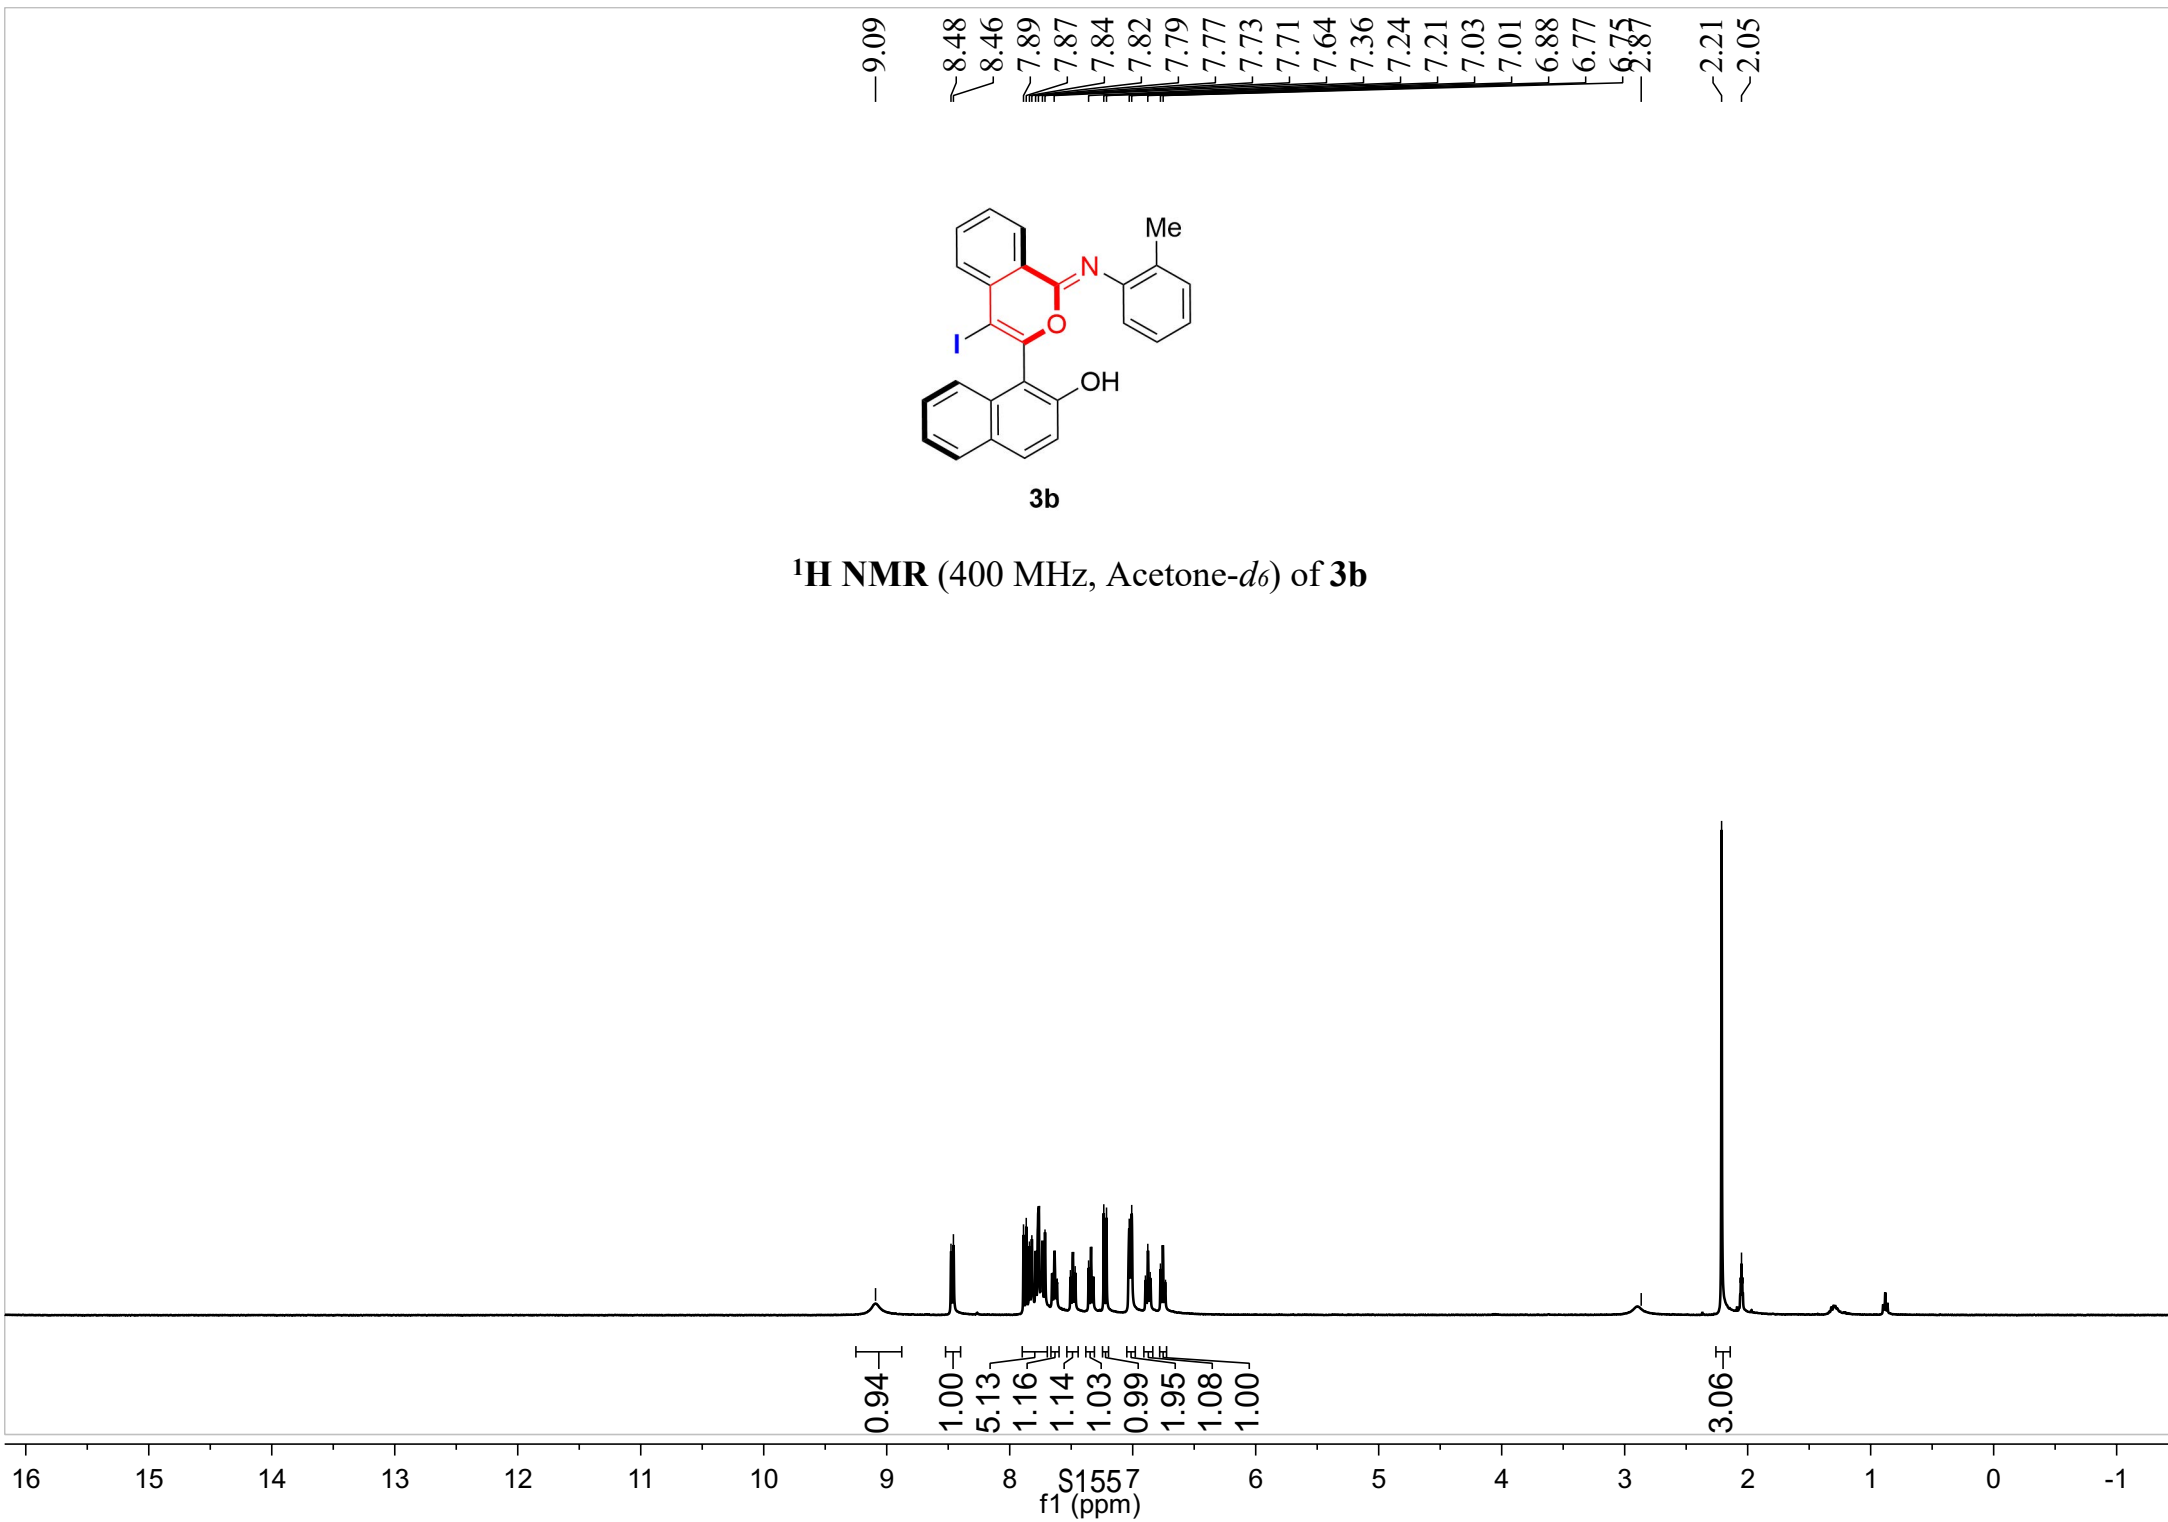

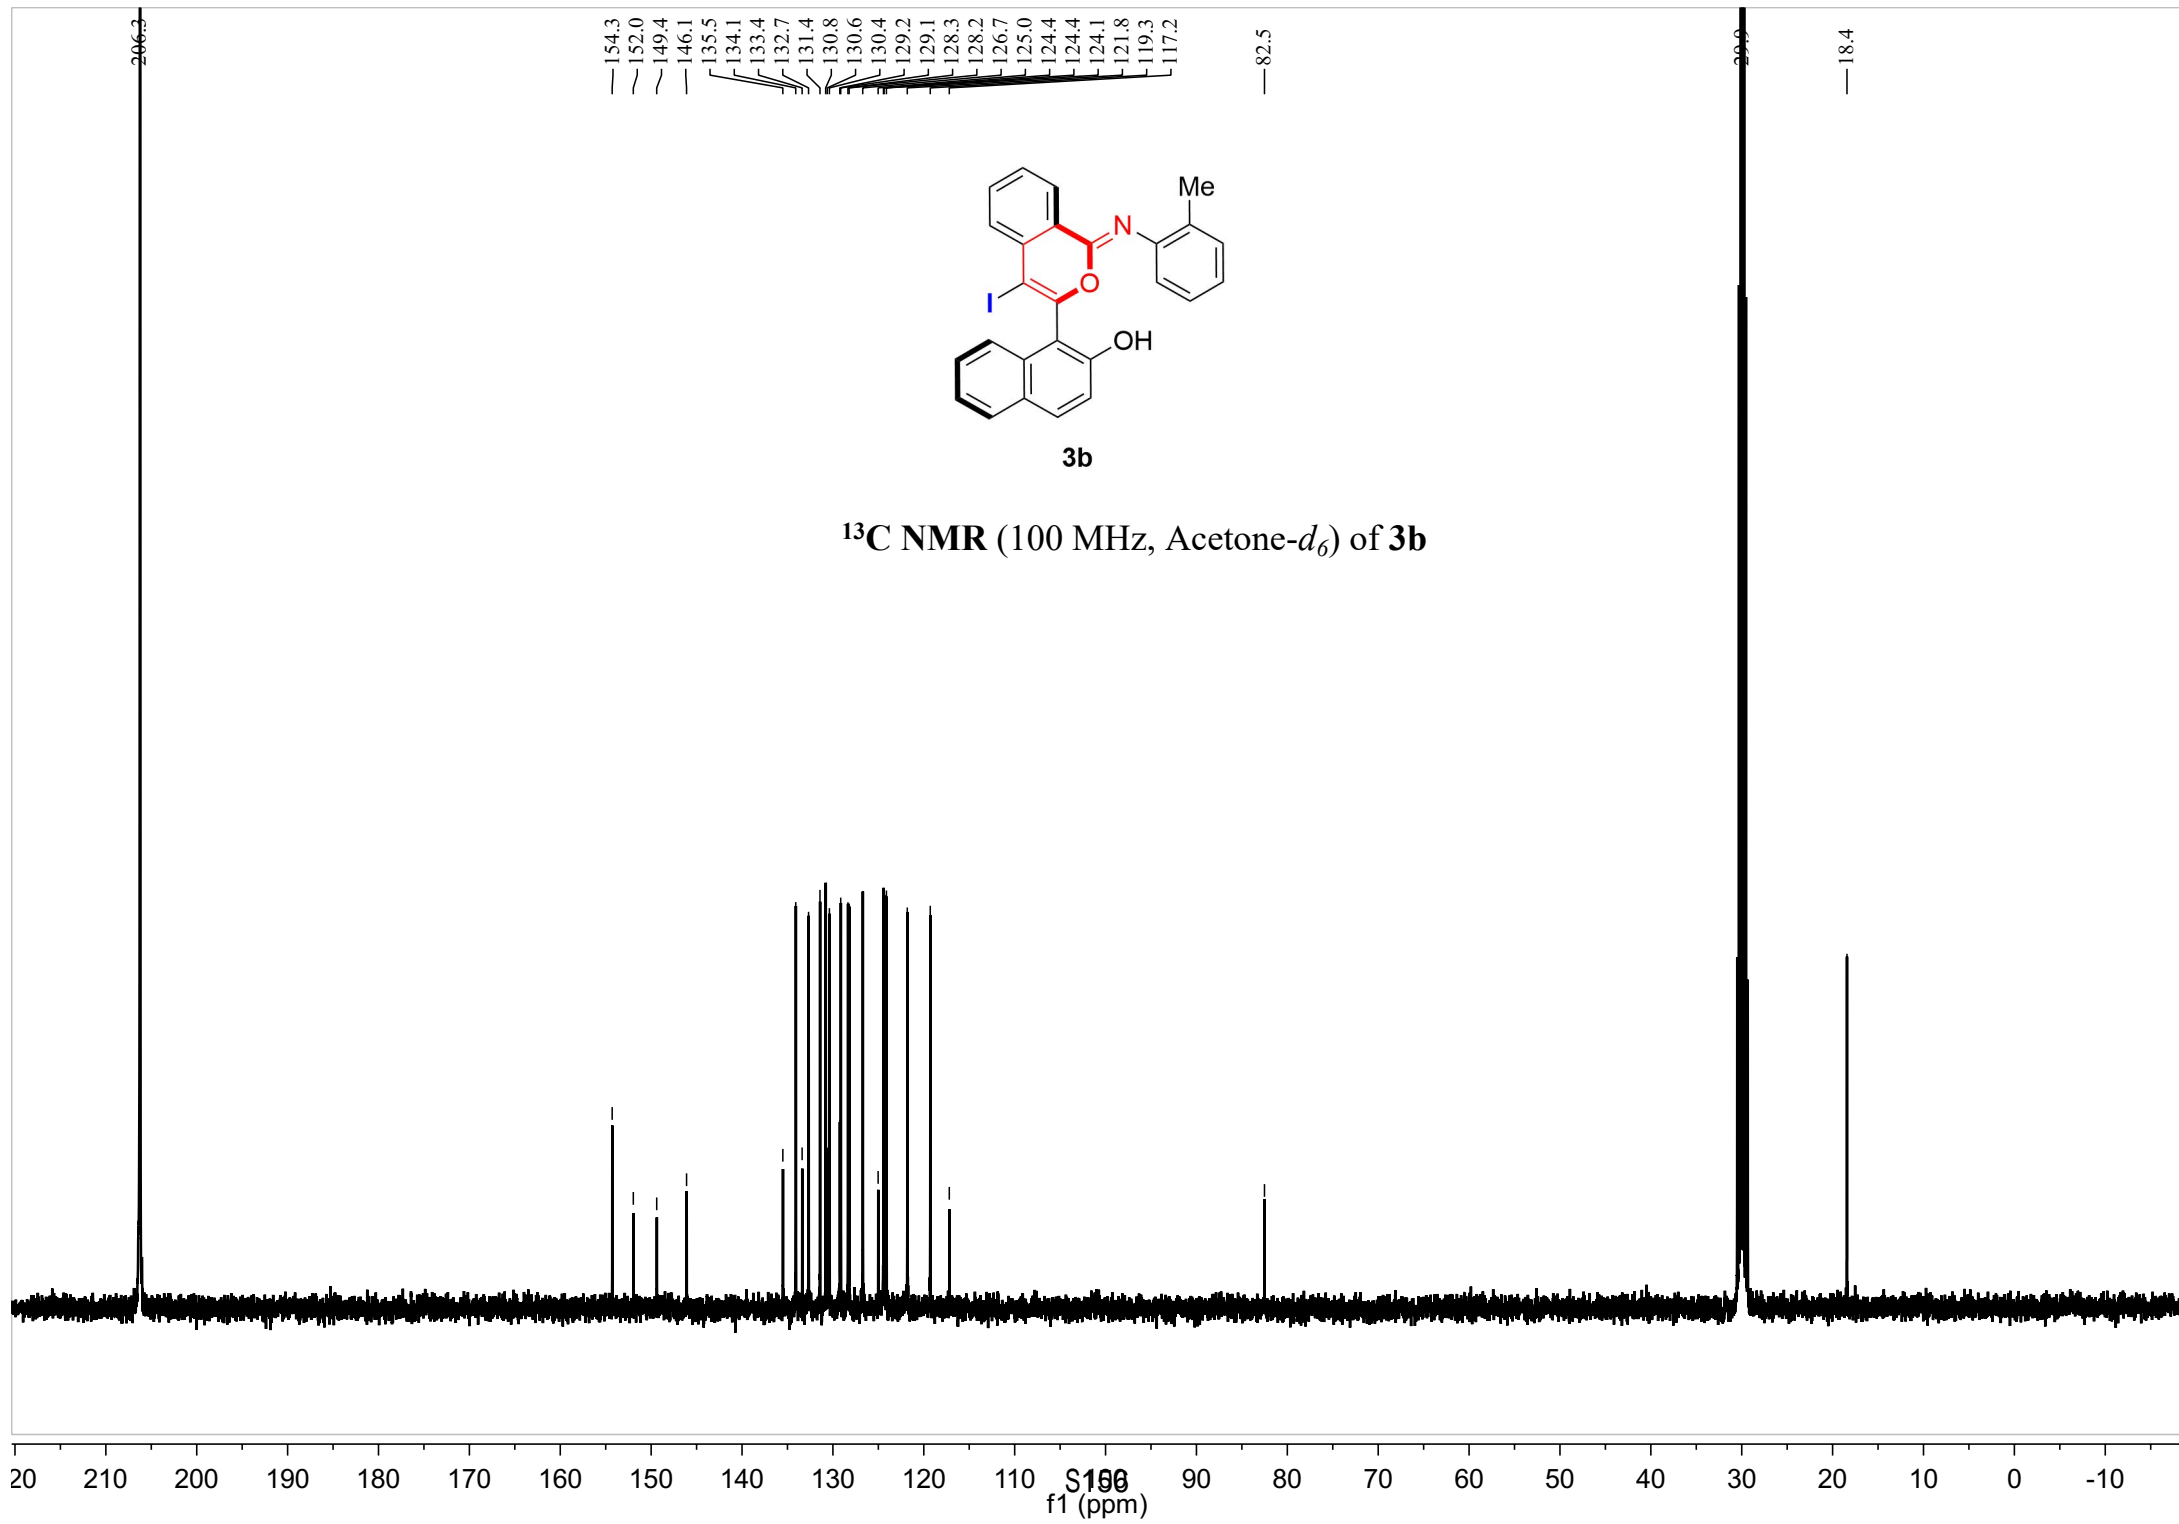

9.04  
8.44  
8.42  
7.87  
7.84  
7.82  
7.80  
7.77  
7.75  
7.72  
7.70  
7.63  
7.62  
7.60  
7.50  
7.48  
7.46  
7.35  
7.33  
7.31  
7.21  
7.18  
6.97  
6.95  
6.80  
6.78  
6.76  
6.74  
6.68  
6.67  
6.65  
3.96  
3.94  
3.93  
3.93  
3.92  
3.91  
2.88  
2.04  
1.31  
1.29  
1.27  
0.00

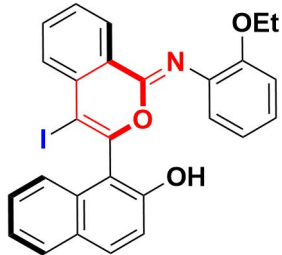

3c

<sup>1</sup>H NMR (400 MHz, Acetone-d<sub>6</sub>) of 3c

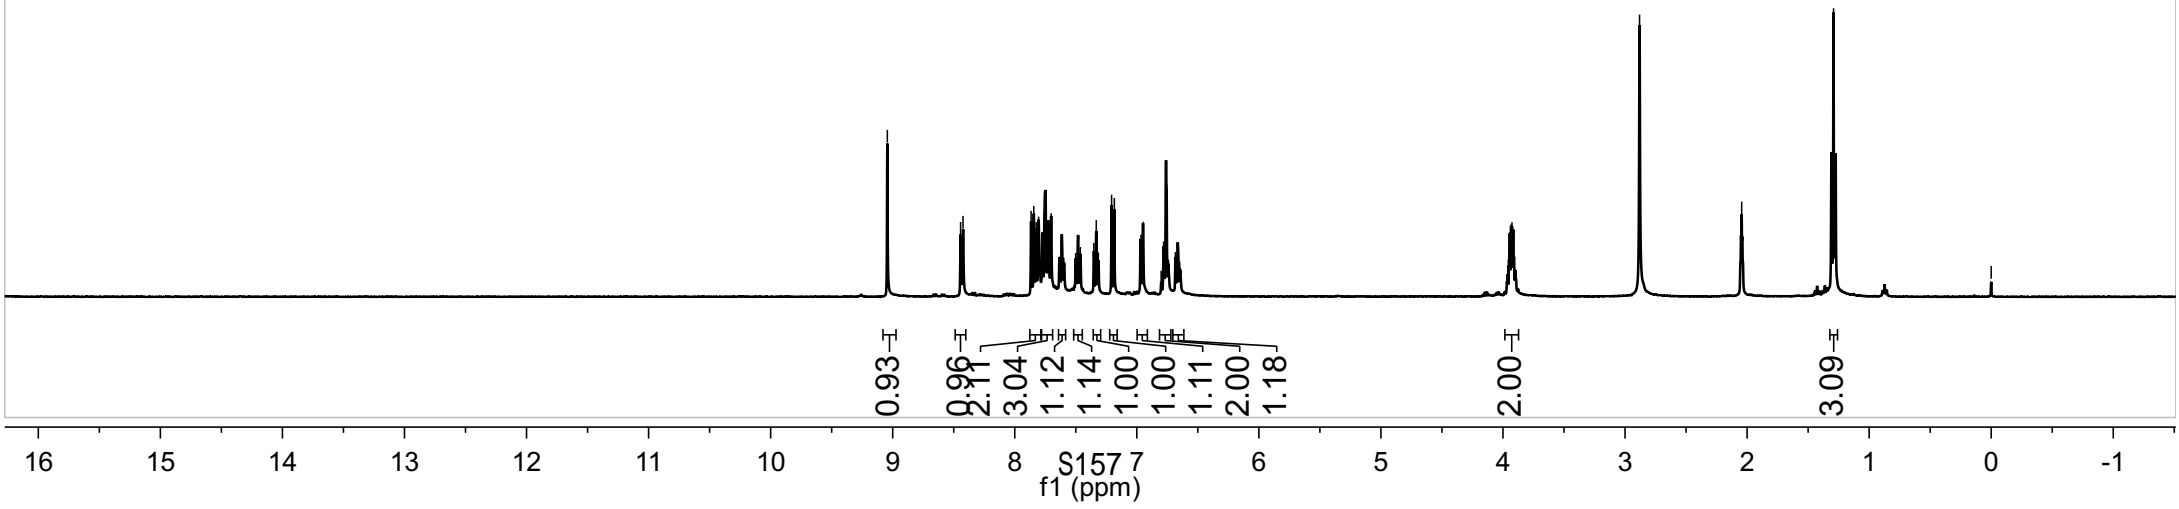

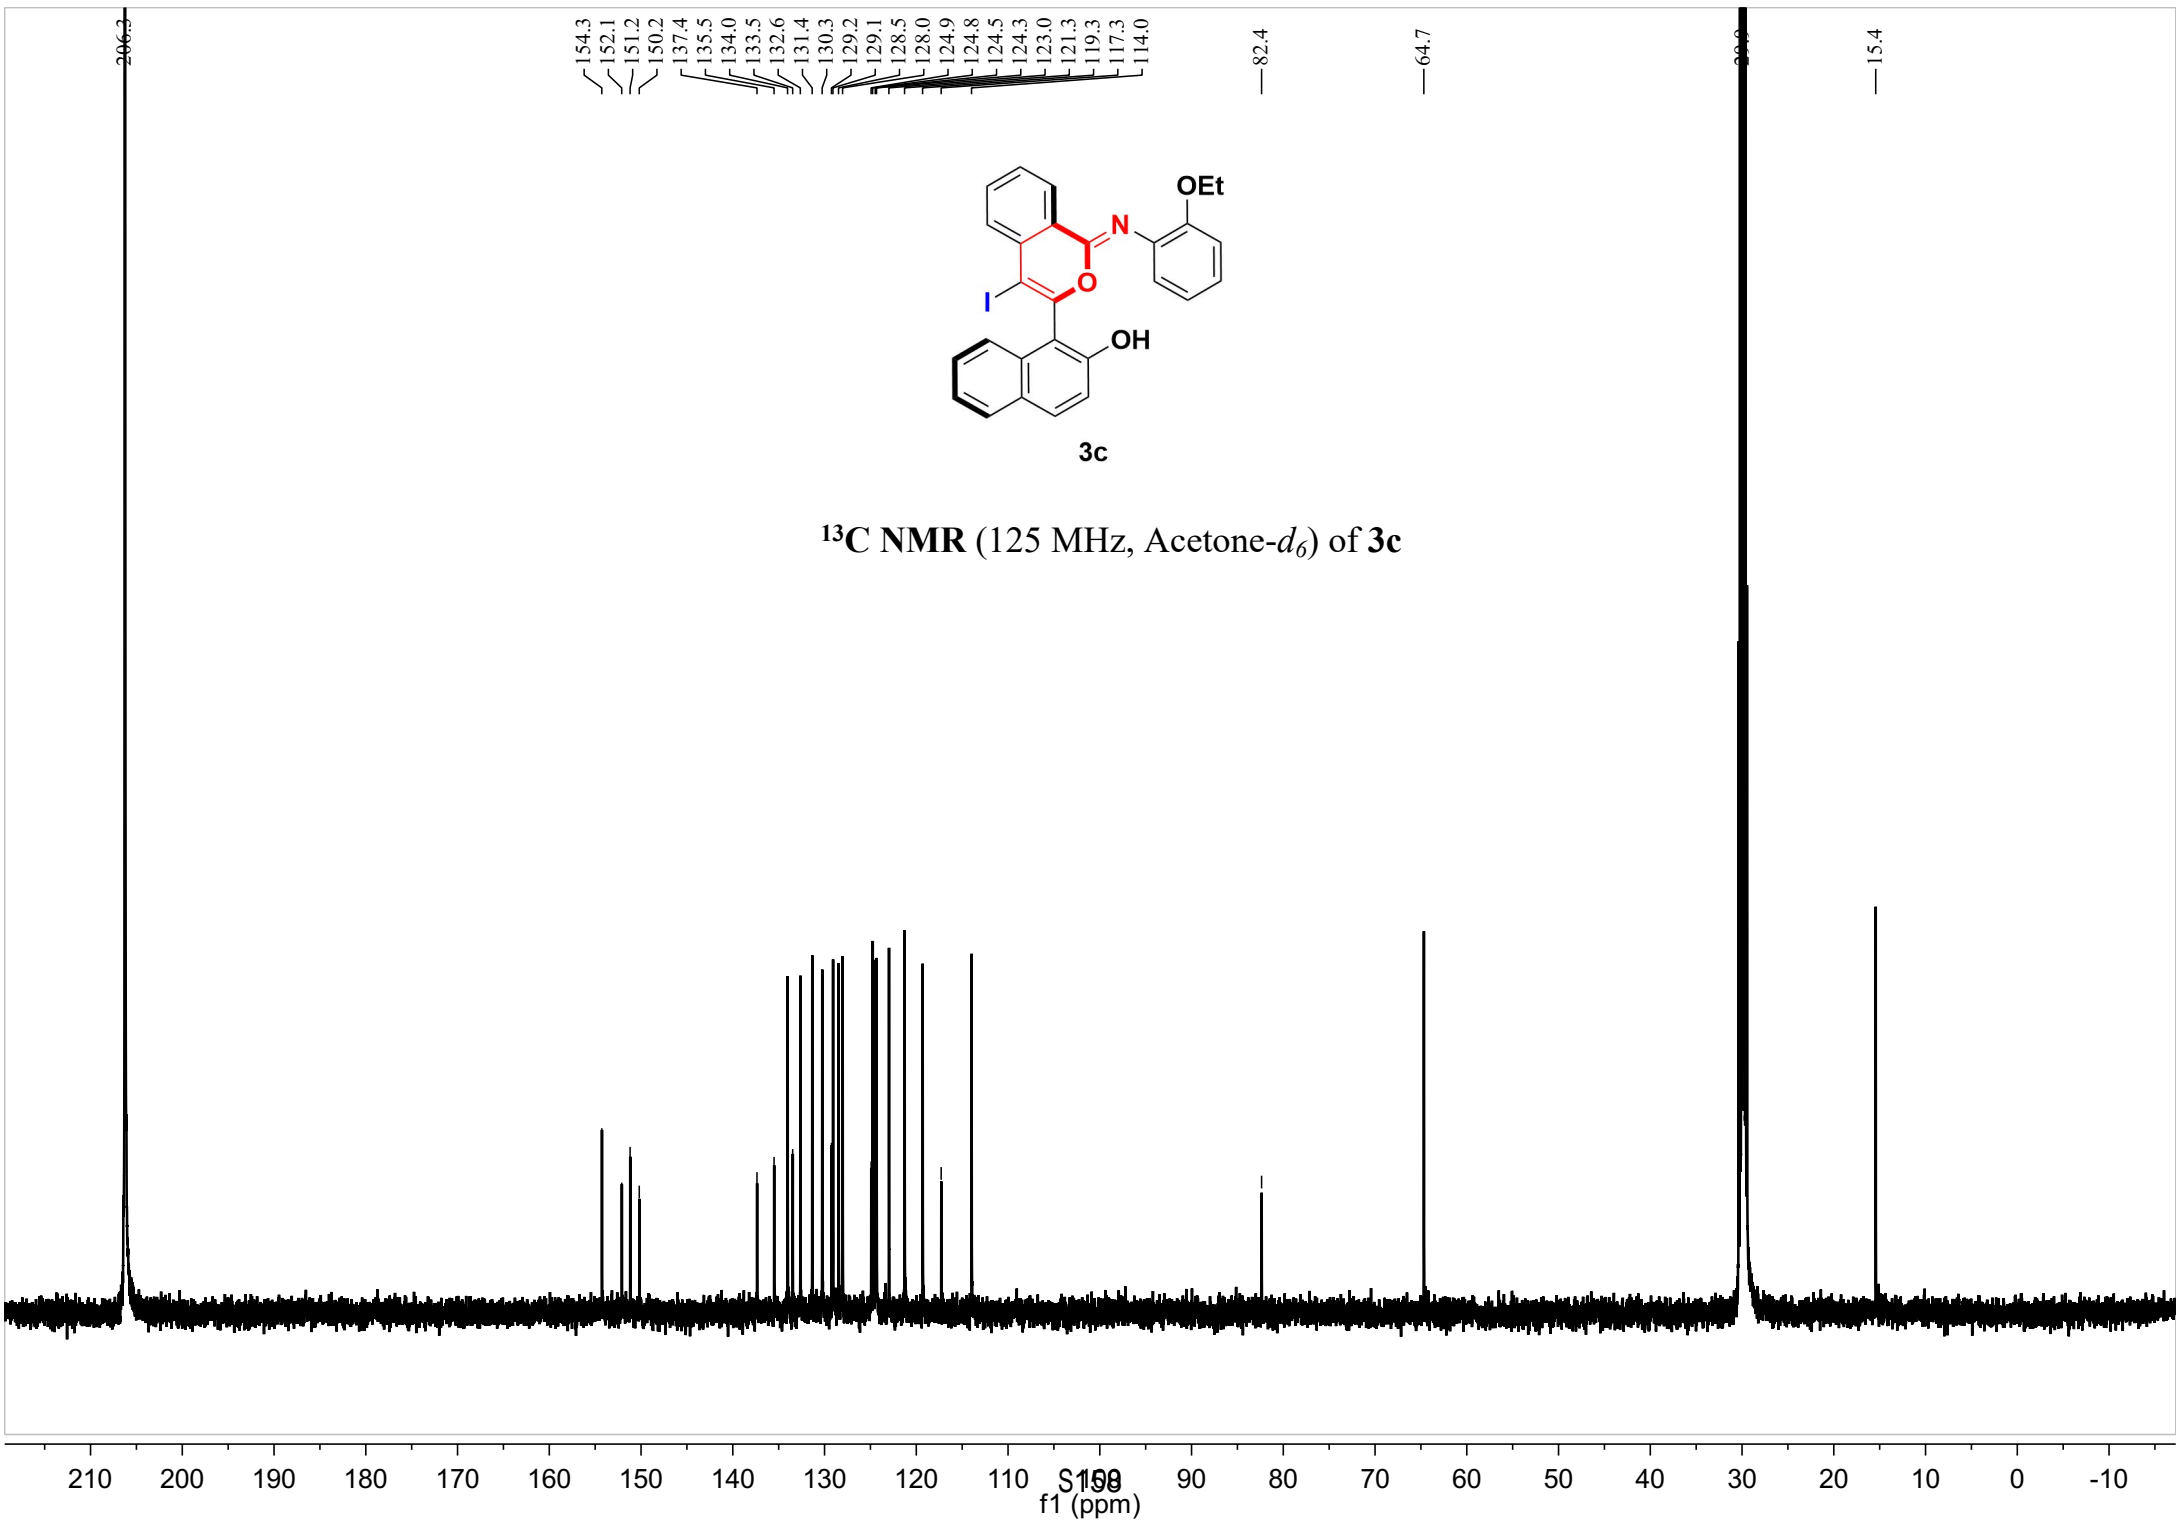

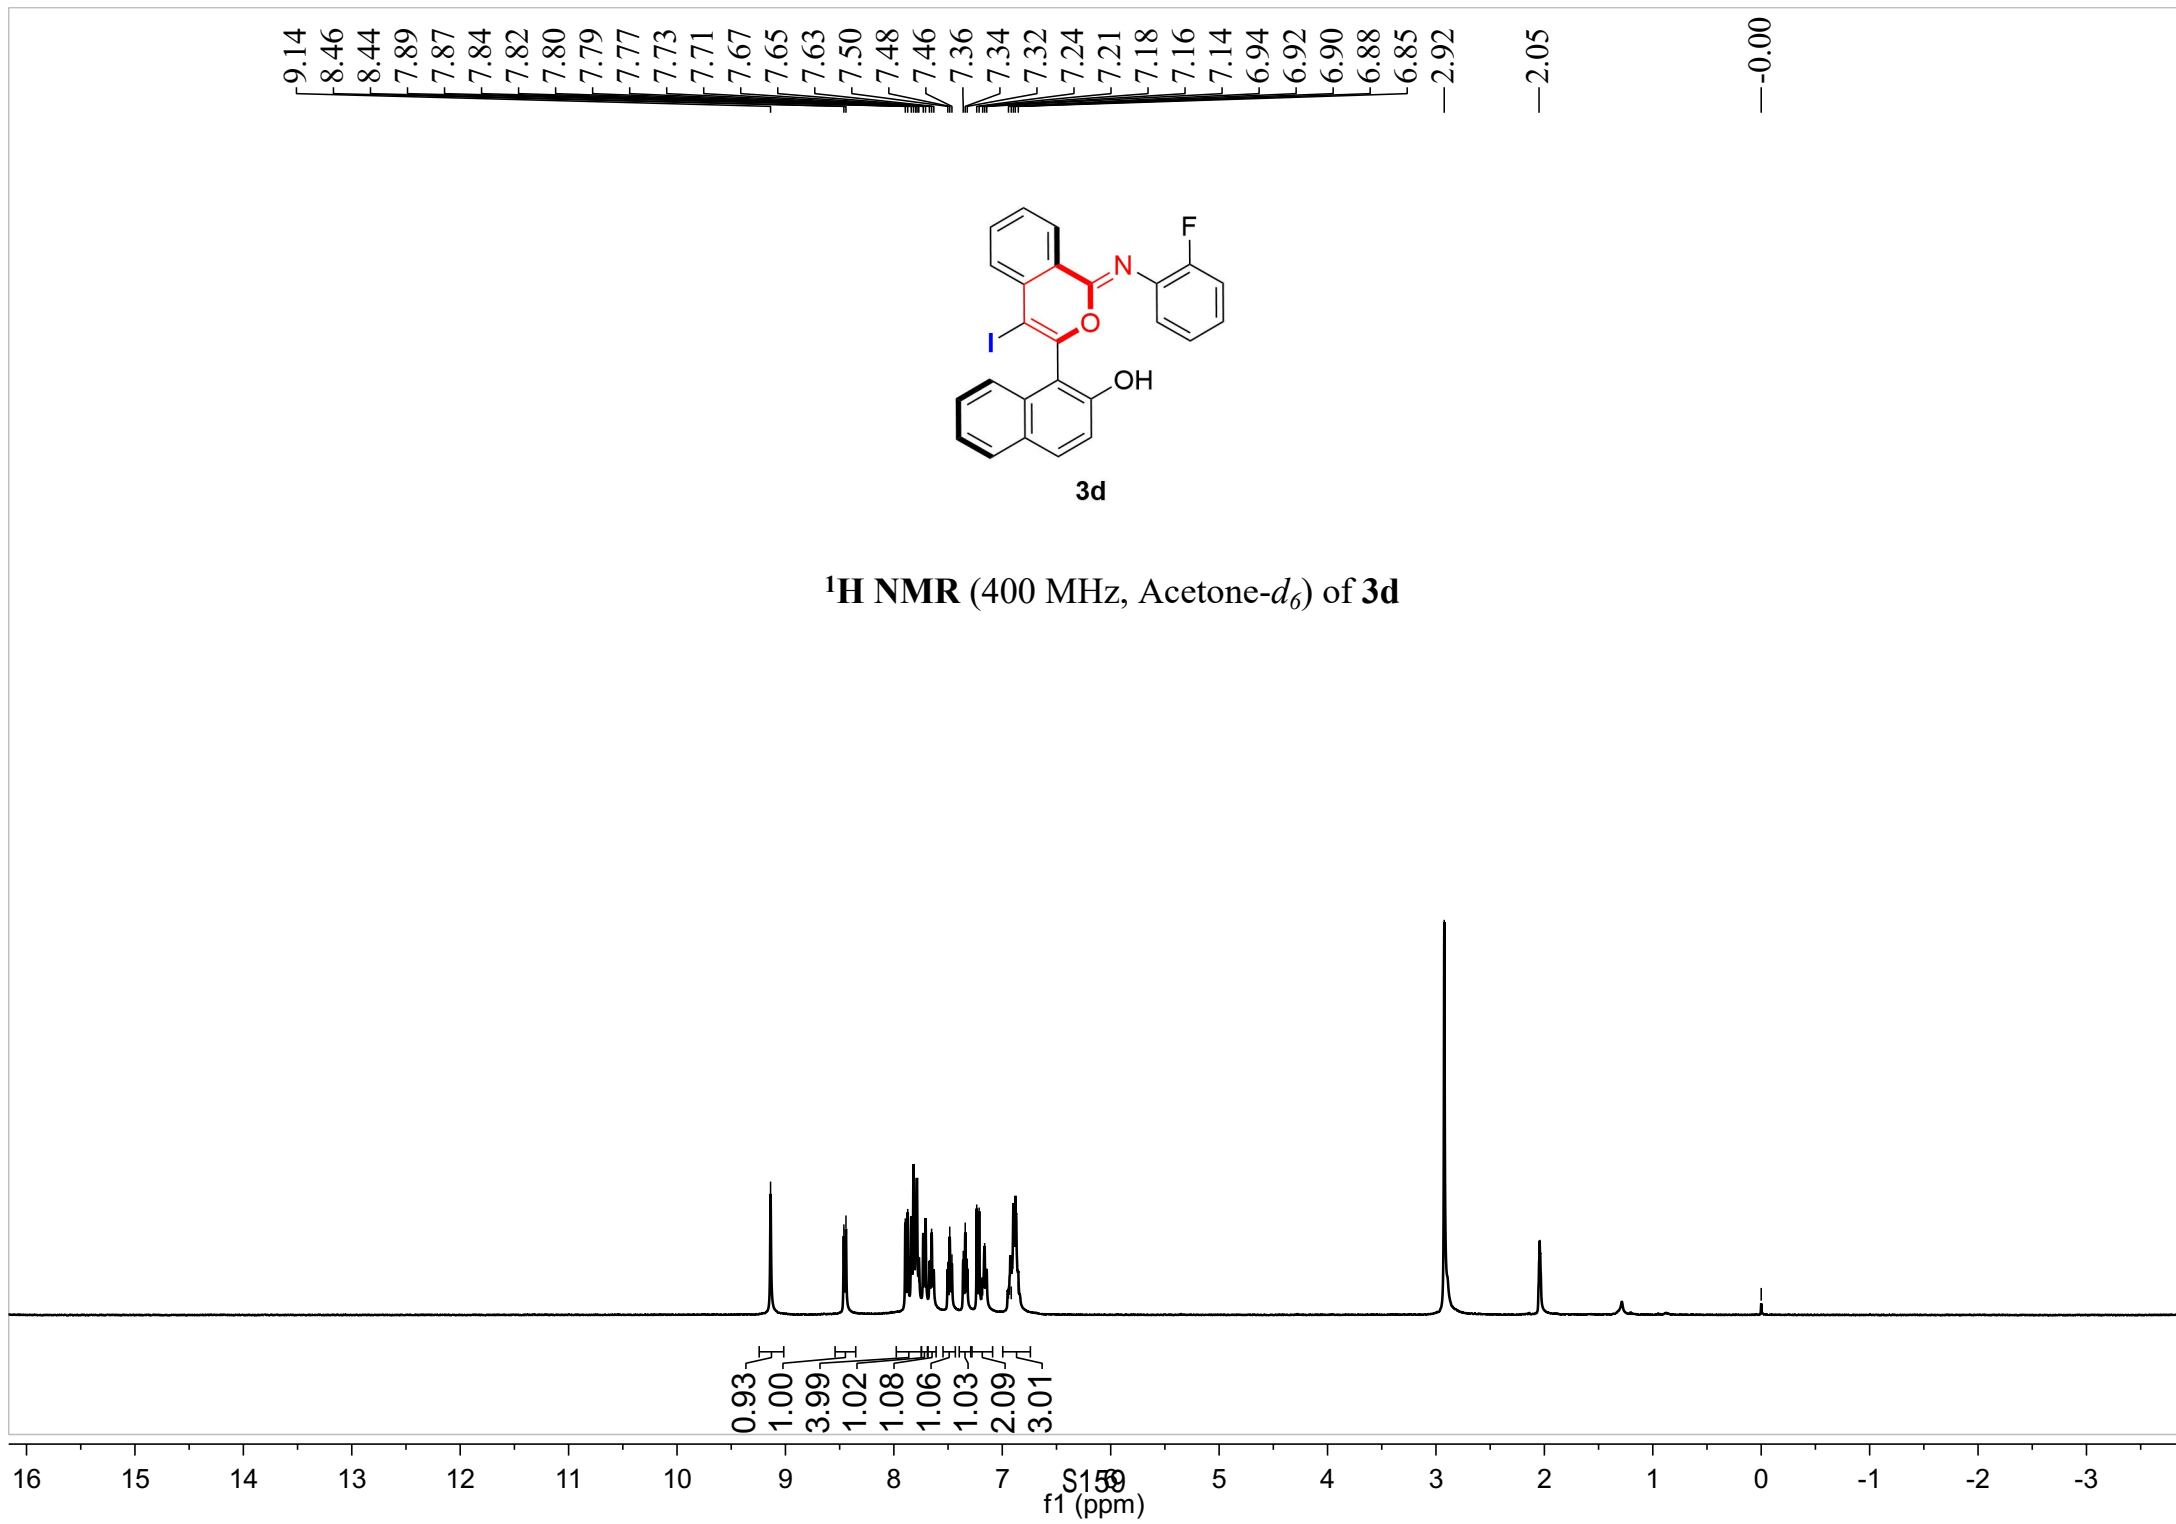

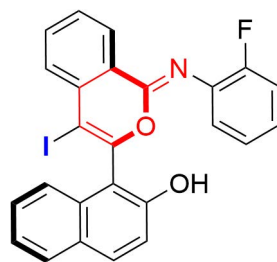

**3d**

--124.53

**$^{19}\text{F}$  NMR (376 MHz, Acetone- $d_6$ ) of 3d**

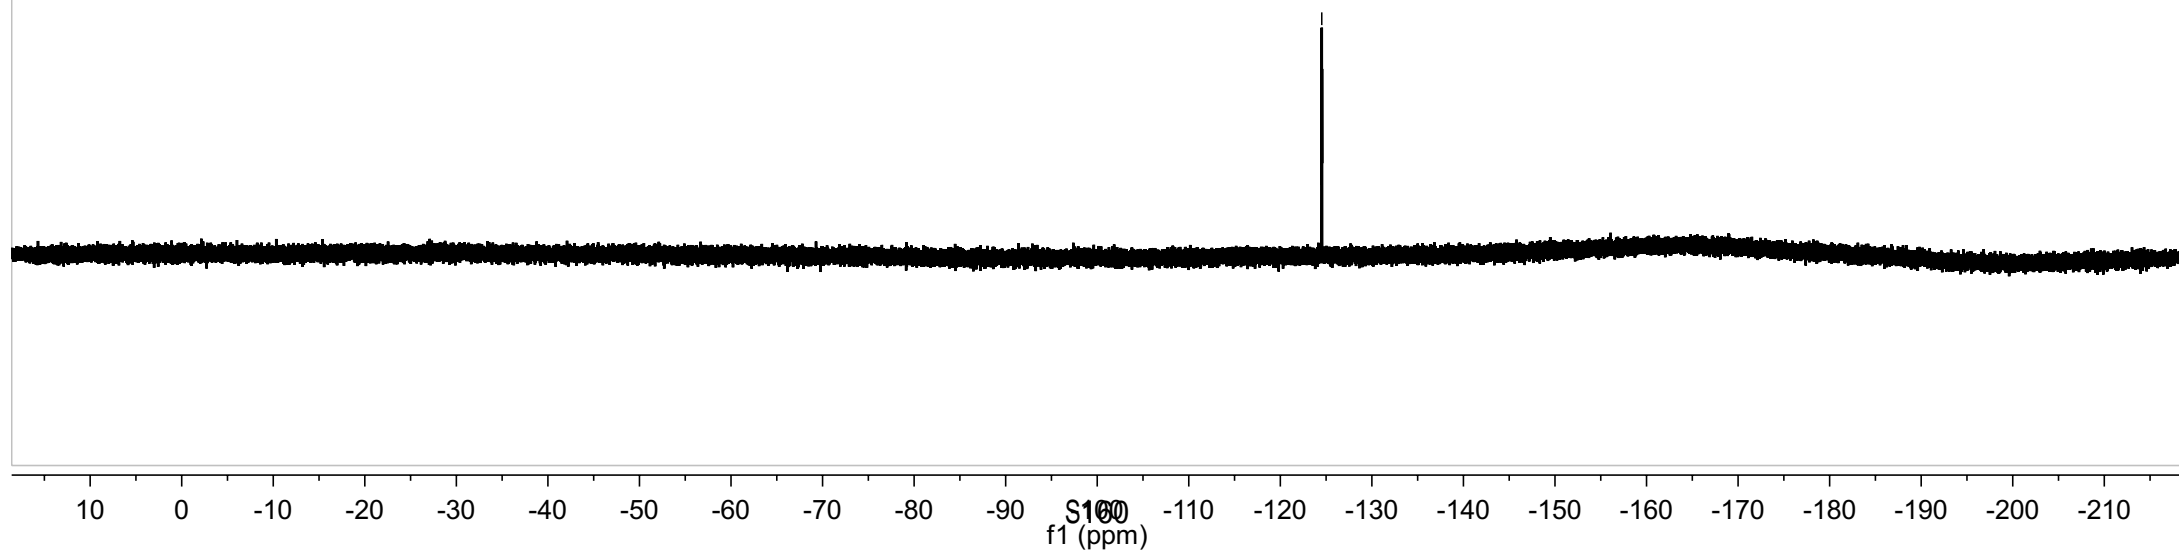



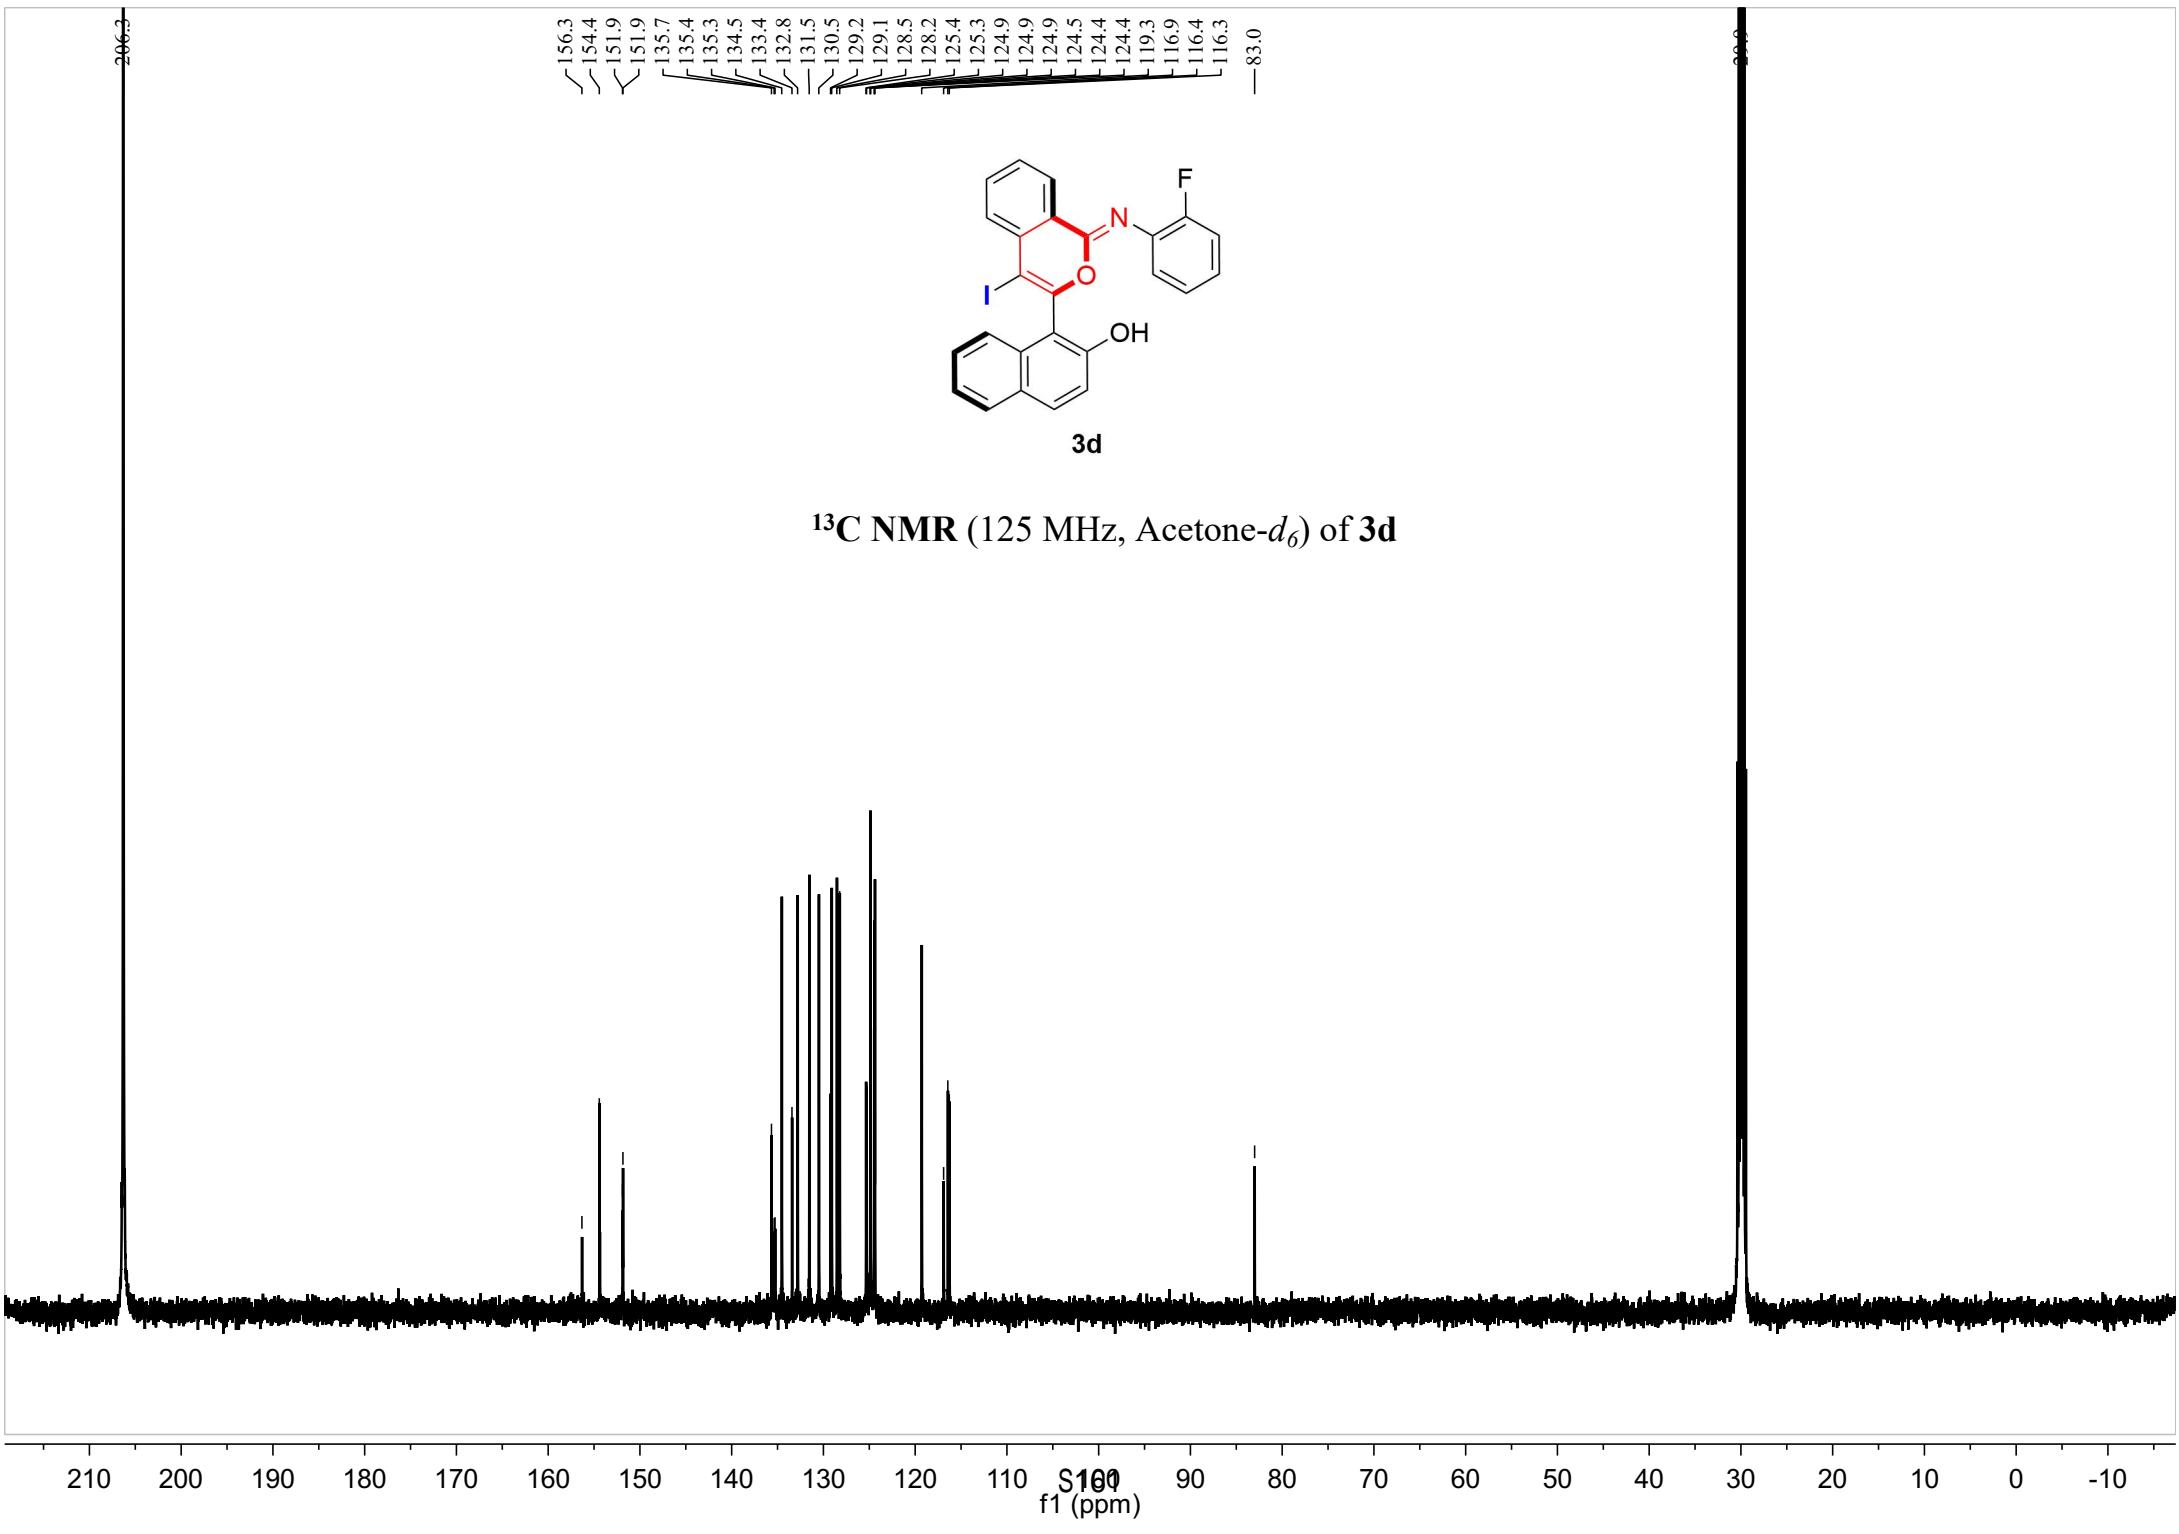

9.15  
8.48  
8.47  
7.88  
7.86  
7.83  
7.82  
7.81  
7.80  
7.78  
7.77  
7.74  
7.72  
7.67  
7.65  
7.64  
7.50  
7.48  
7.46  
7.35  
7.33  
7.31  
7.25  
7.23  
7.21  
7.17  
7.15  
7.03  
7.01  
6.99  
6.86  
6.83  
6.82  
-2.96  
-2.05  
-0.00

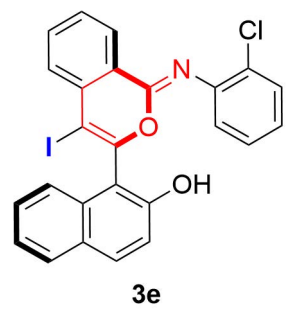

<sup>1</sup>H NMR (400 MHz, Acetone-d<sub>6</sub>) of **3e**

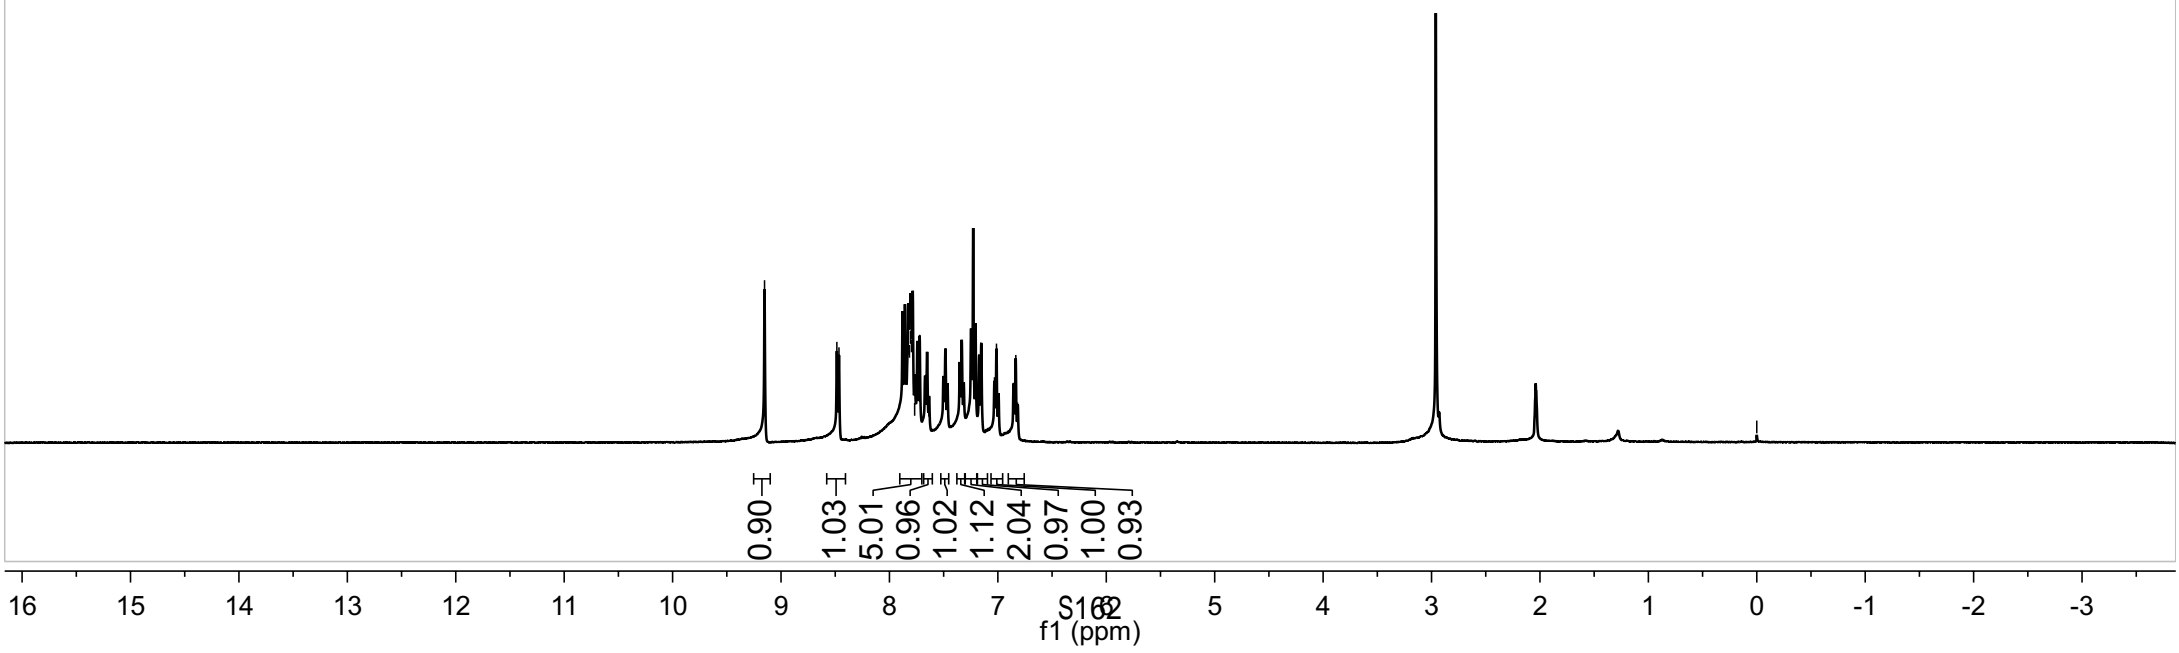

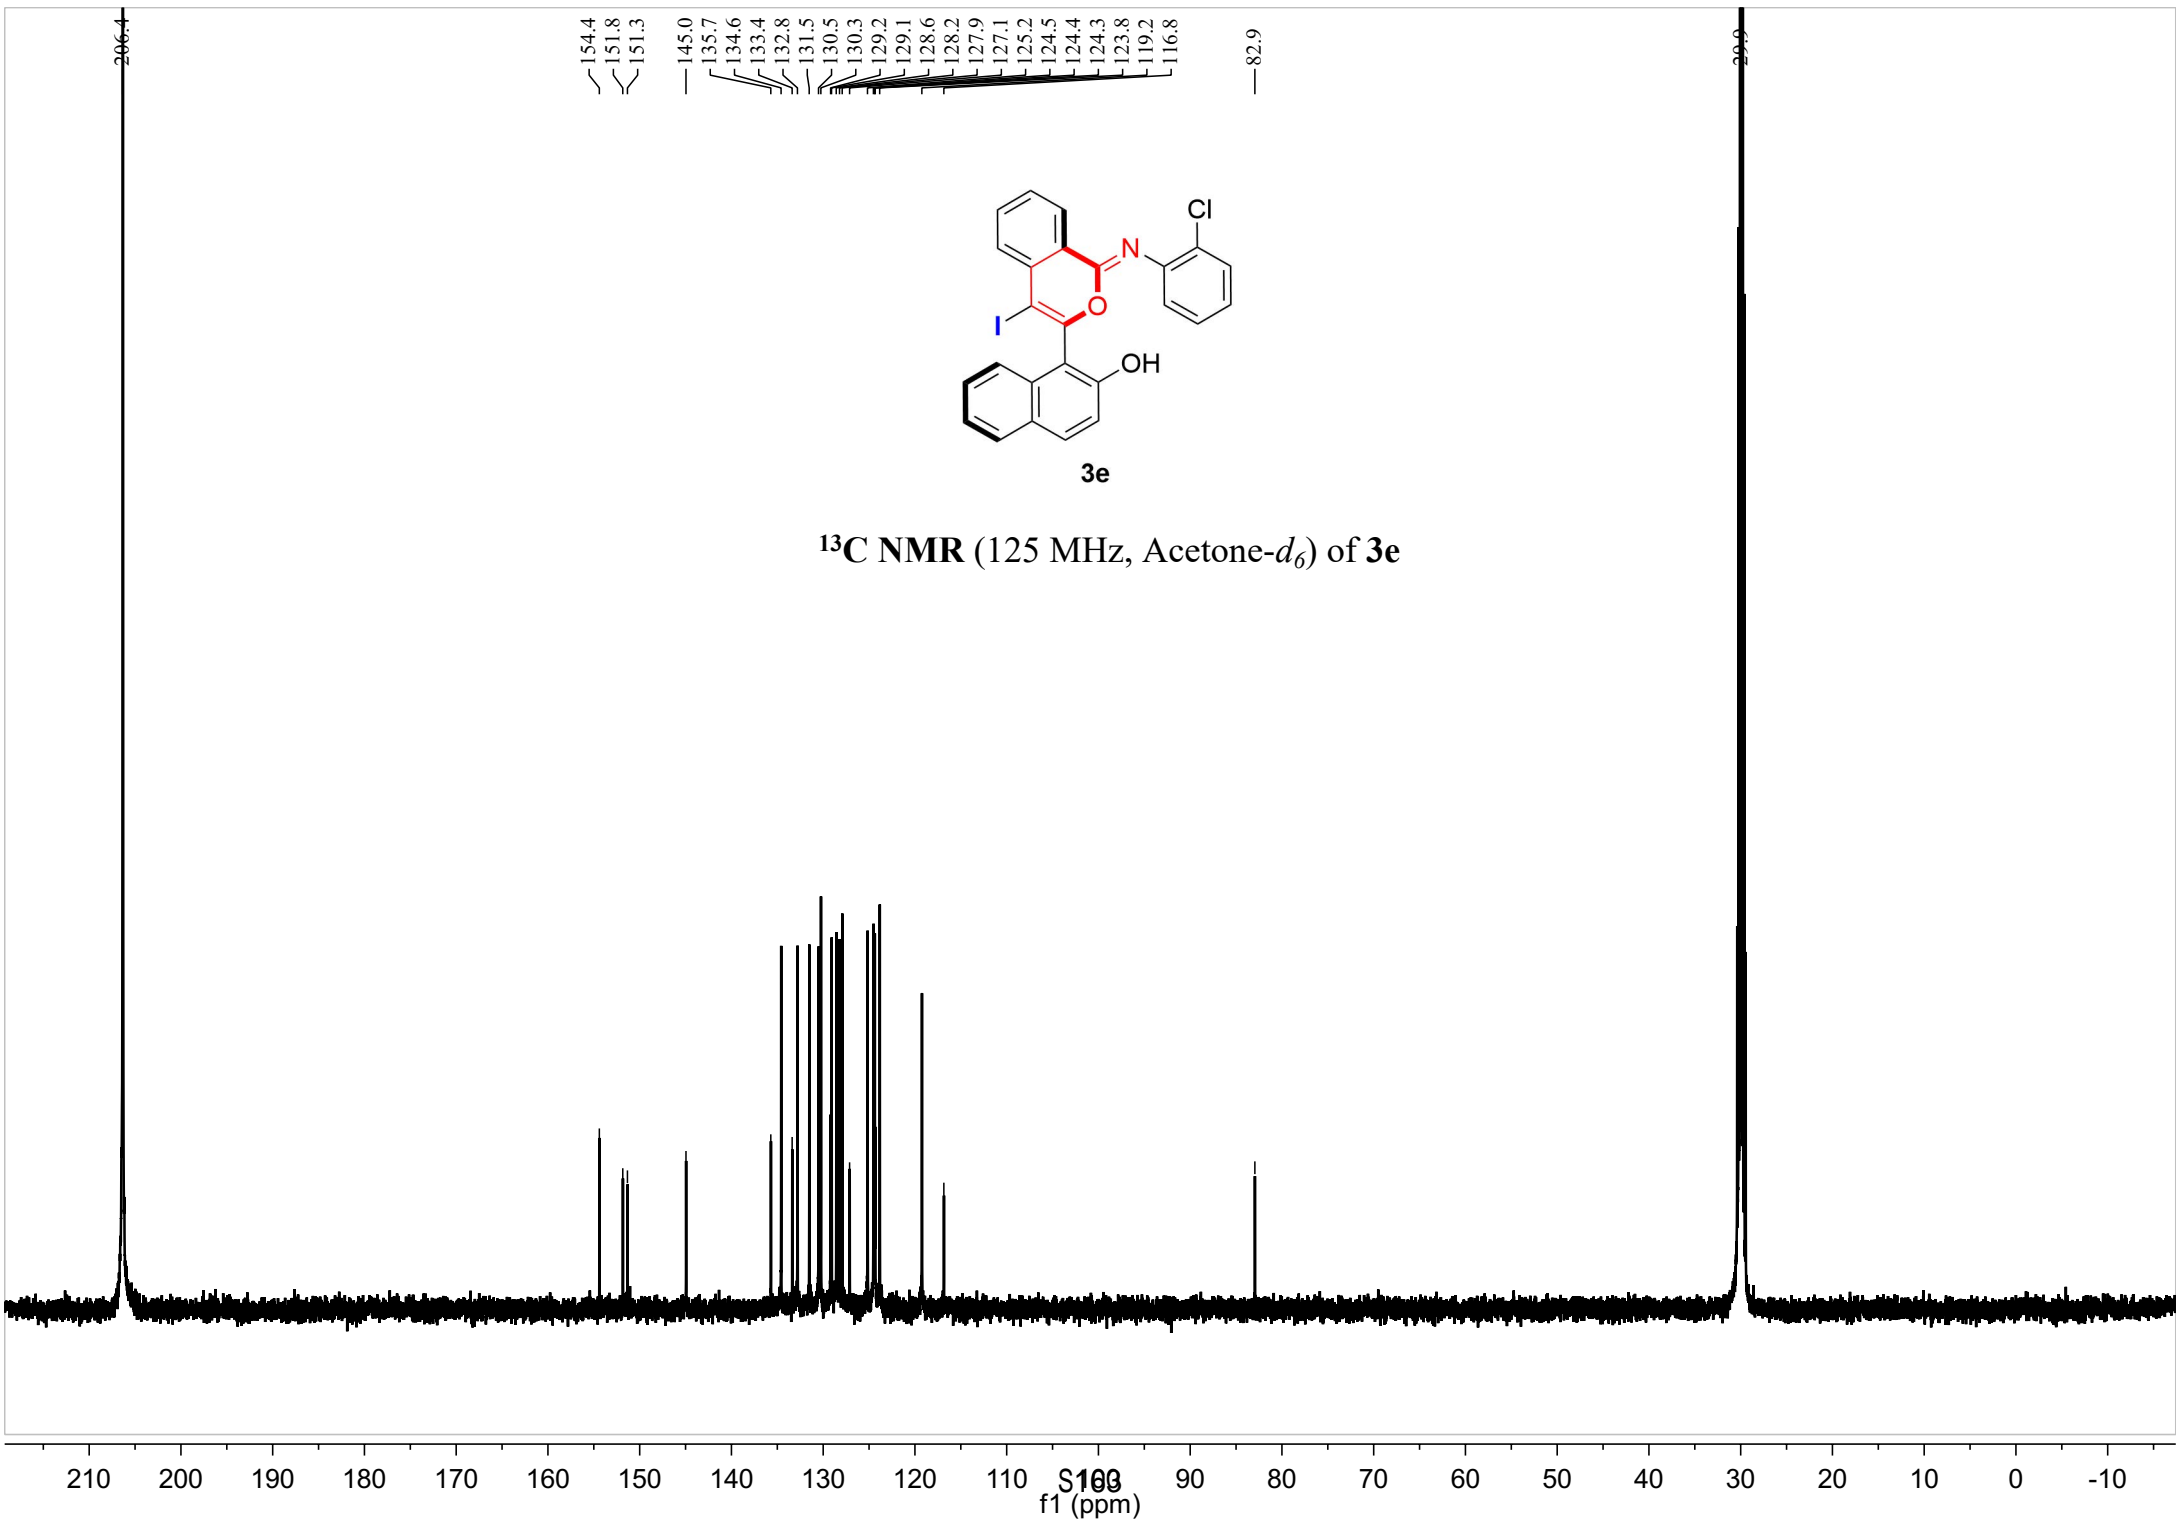

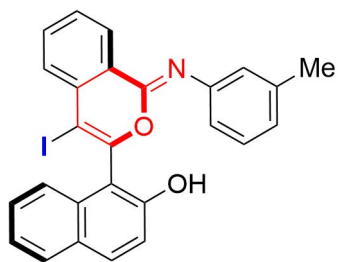

**3f**

**<sup>1</sup>H NMR (400 MHz, DMSO-*d*<sub>6</sub>) of **3f****

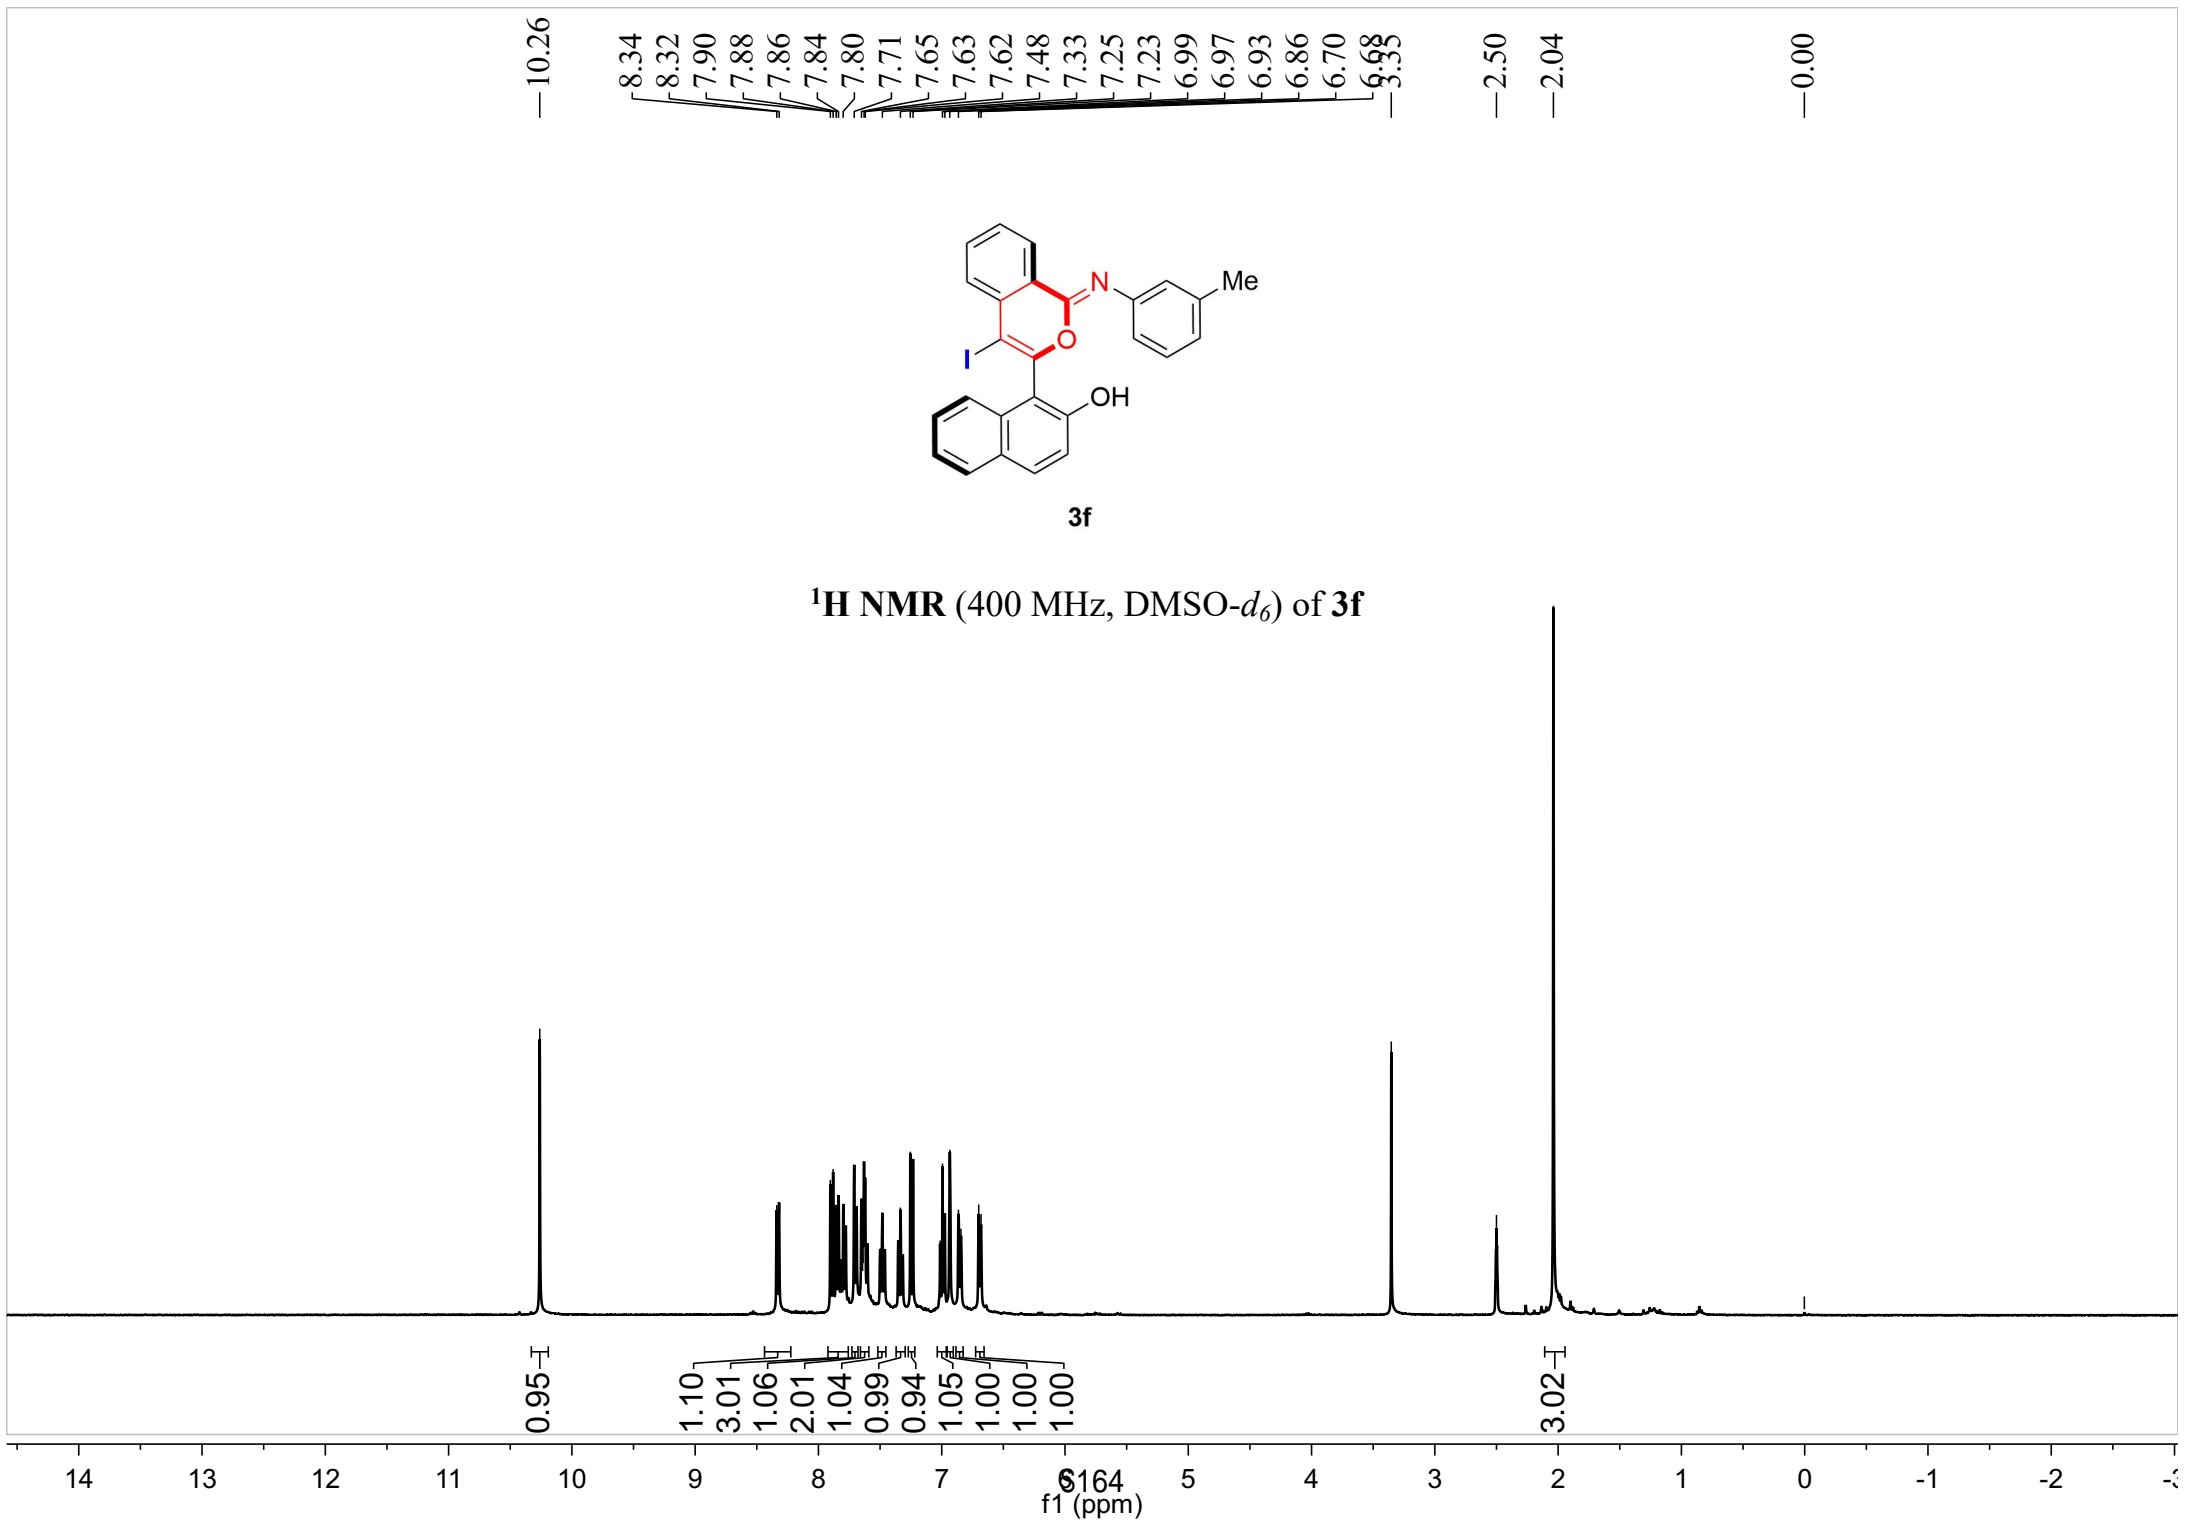

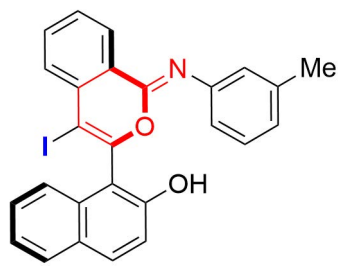

**3f**

<sup>13</sup>C NMR (125 MHz, DMSO-*d*<sub>6</sub>) of **3f**

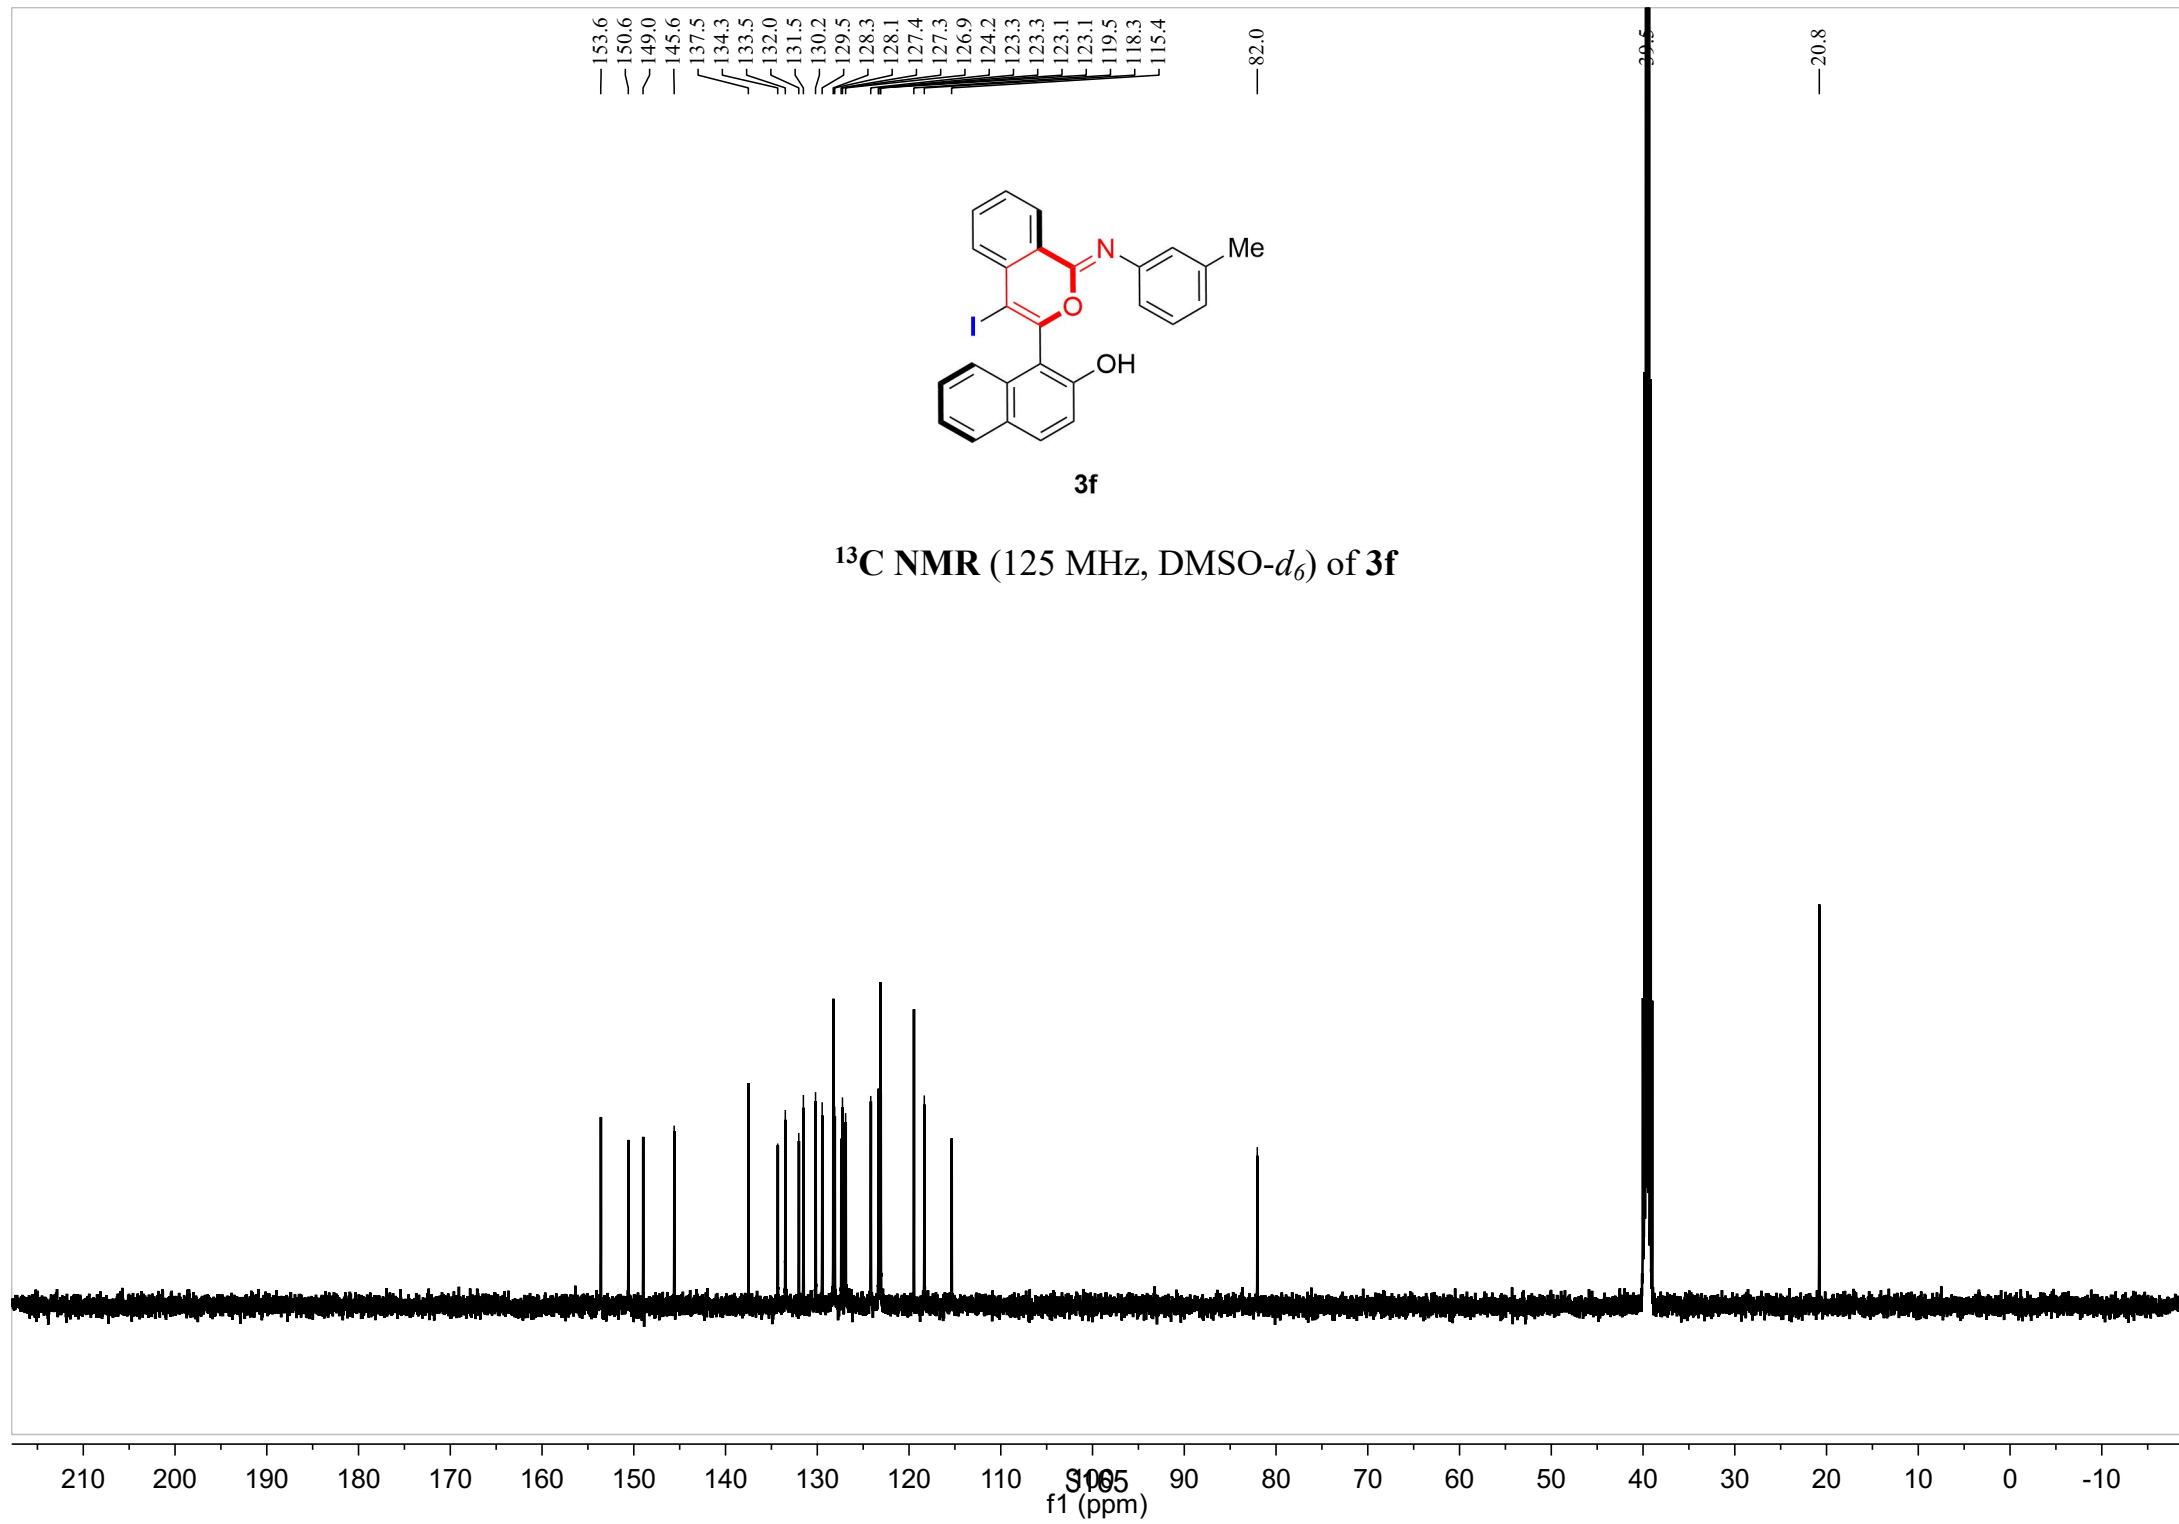

9.16  
8.43  
8.41  
7.94  
7.92  
7.88  
7.86  
7.78  
7.77  
7.76  
7.64  
7.50  
7.38  
7.36  
7.28  
7.25  
7.11  
7.10  
7.07  
7.05  
7.03  
6.92  
6.90  
6.79  
6.77  
2.06  
2.05

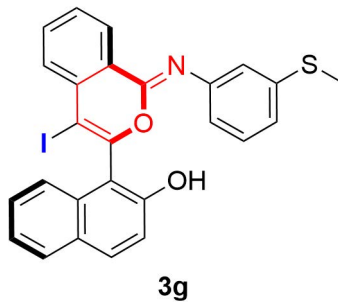

<sup>1</sup>H NMR (400 MHz, Acetone-d<sub>6</sub>) of **3g**

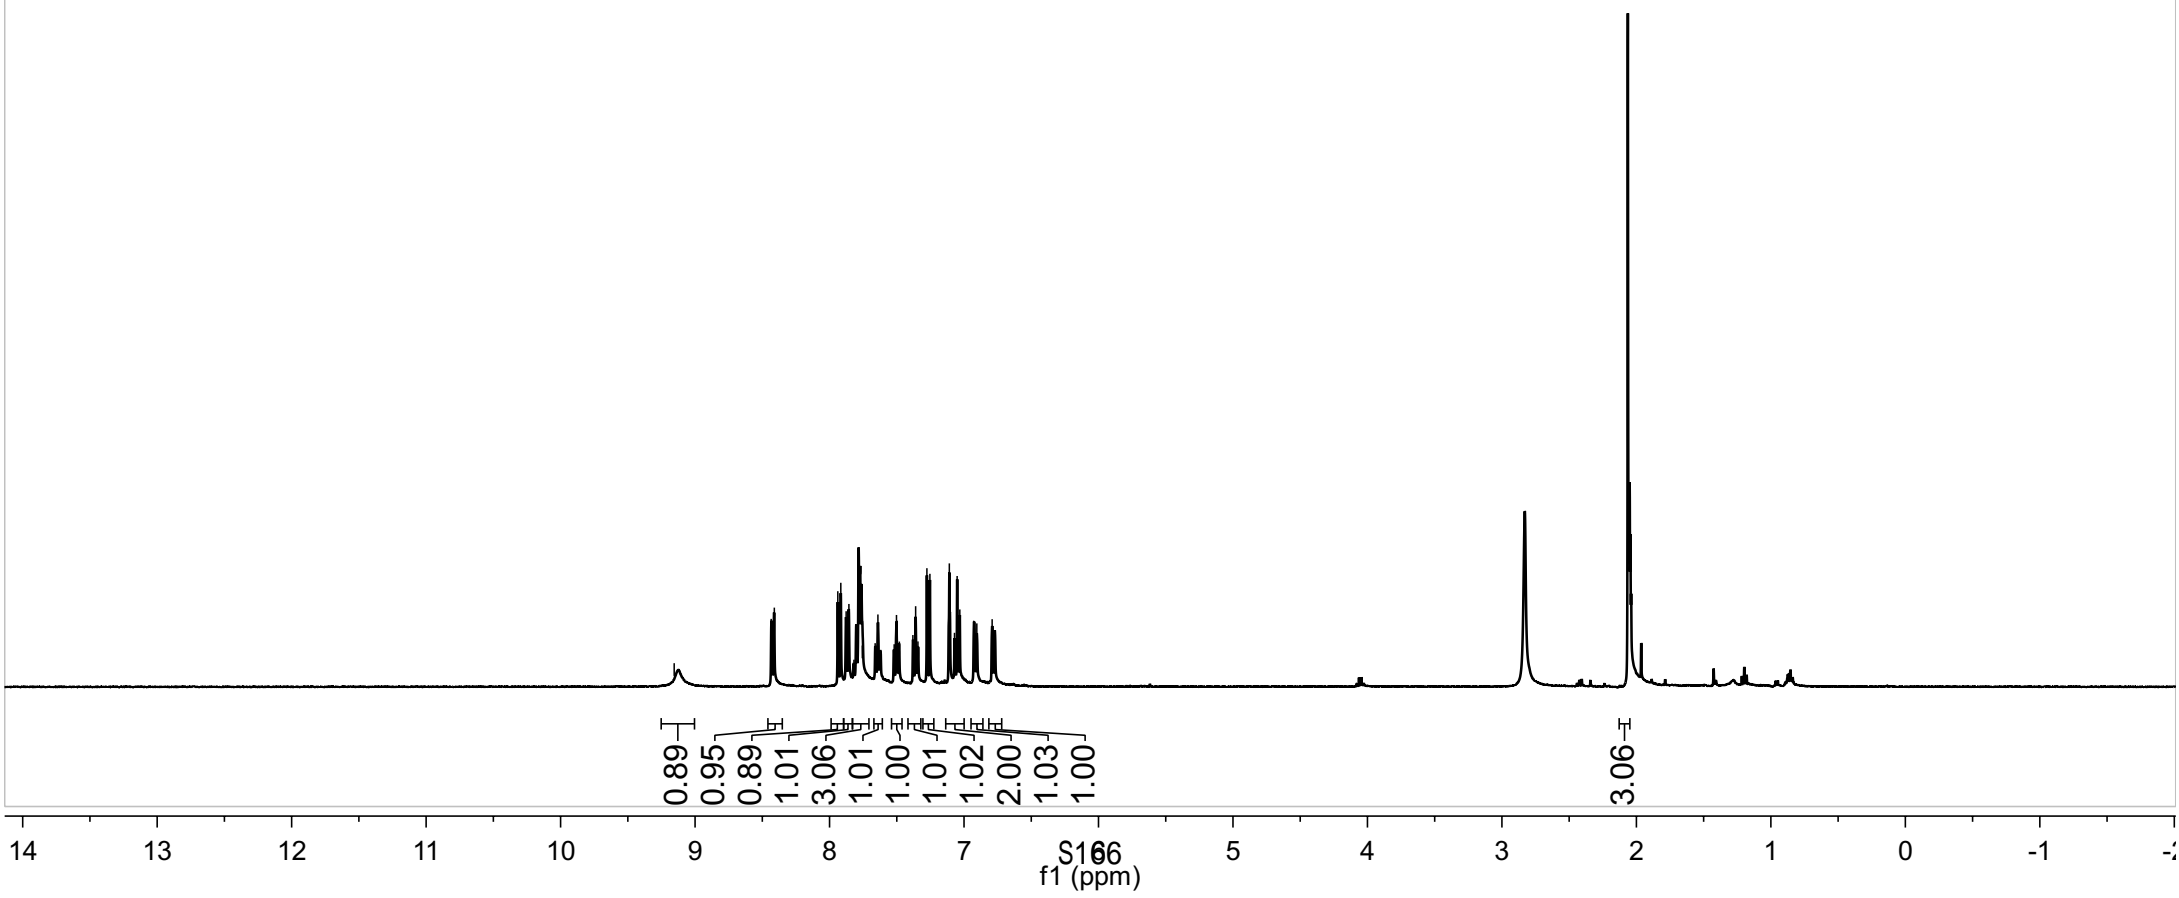

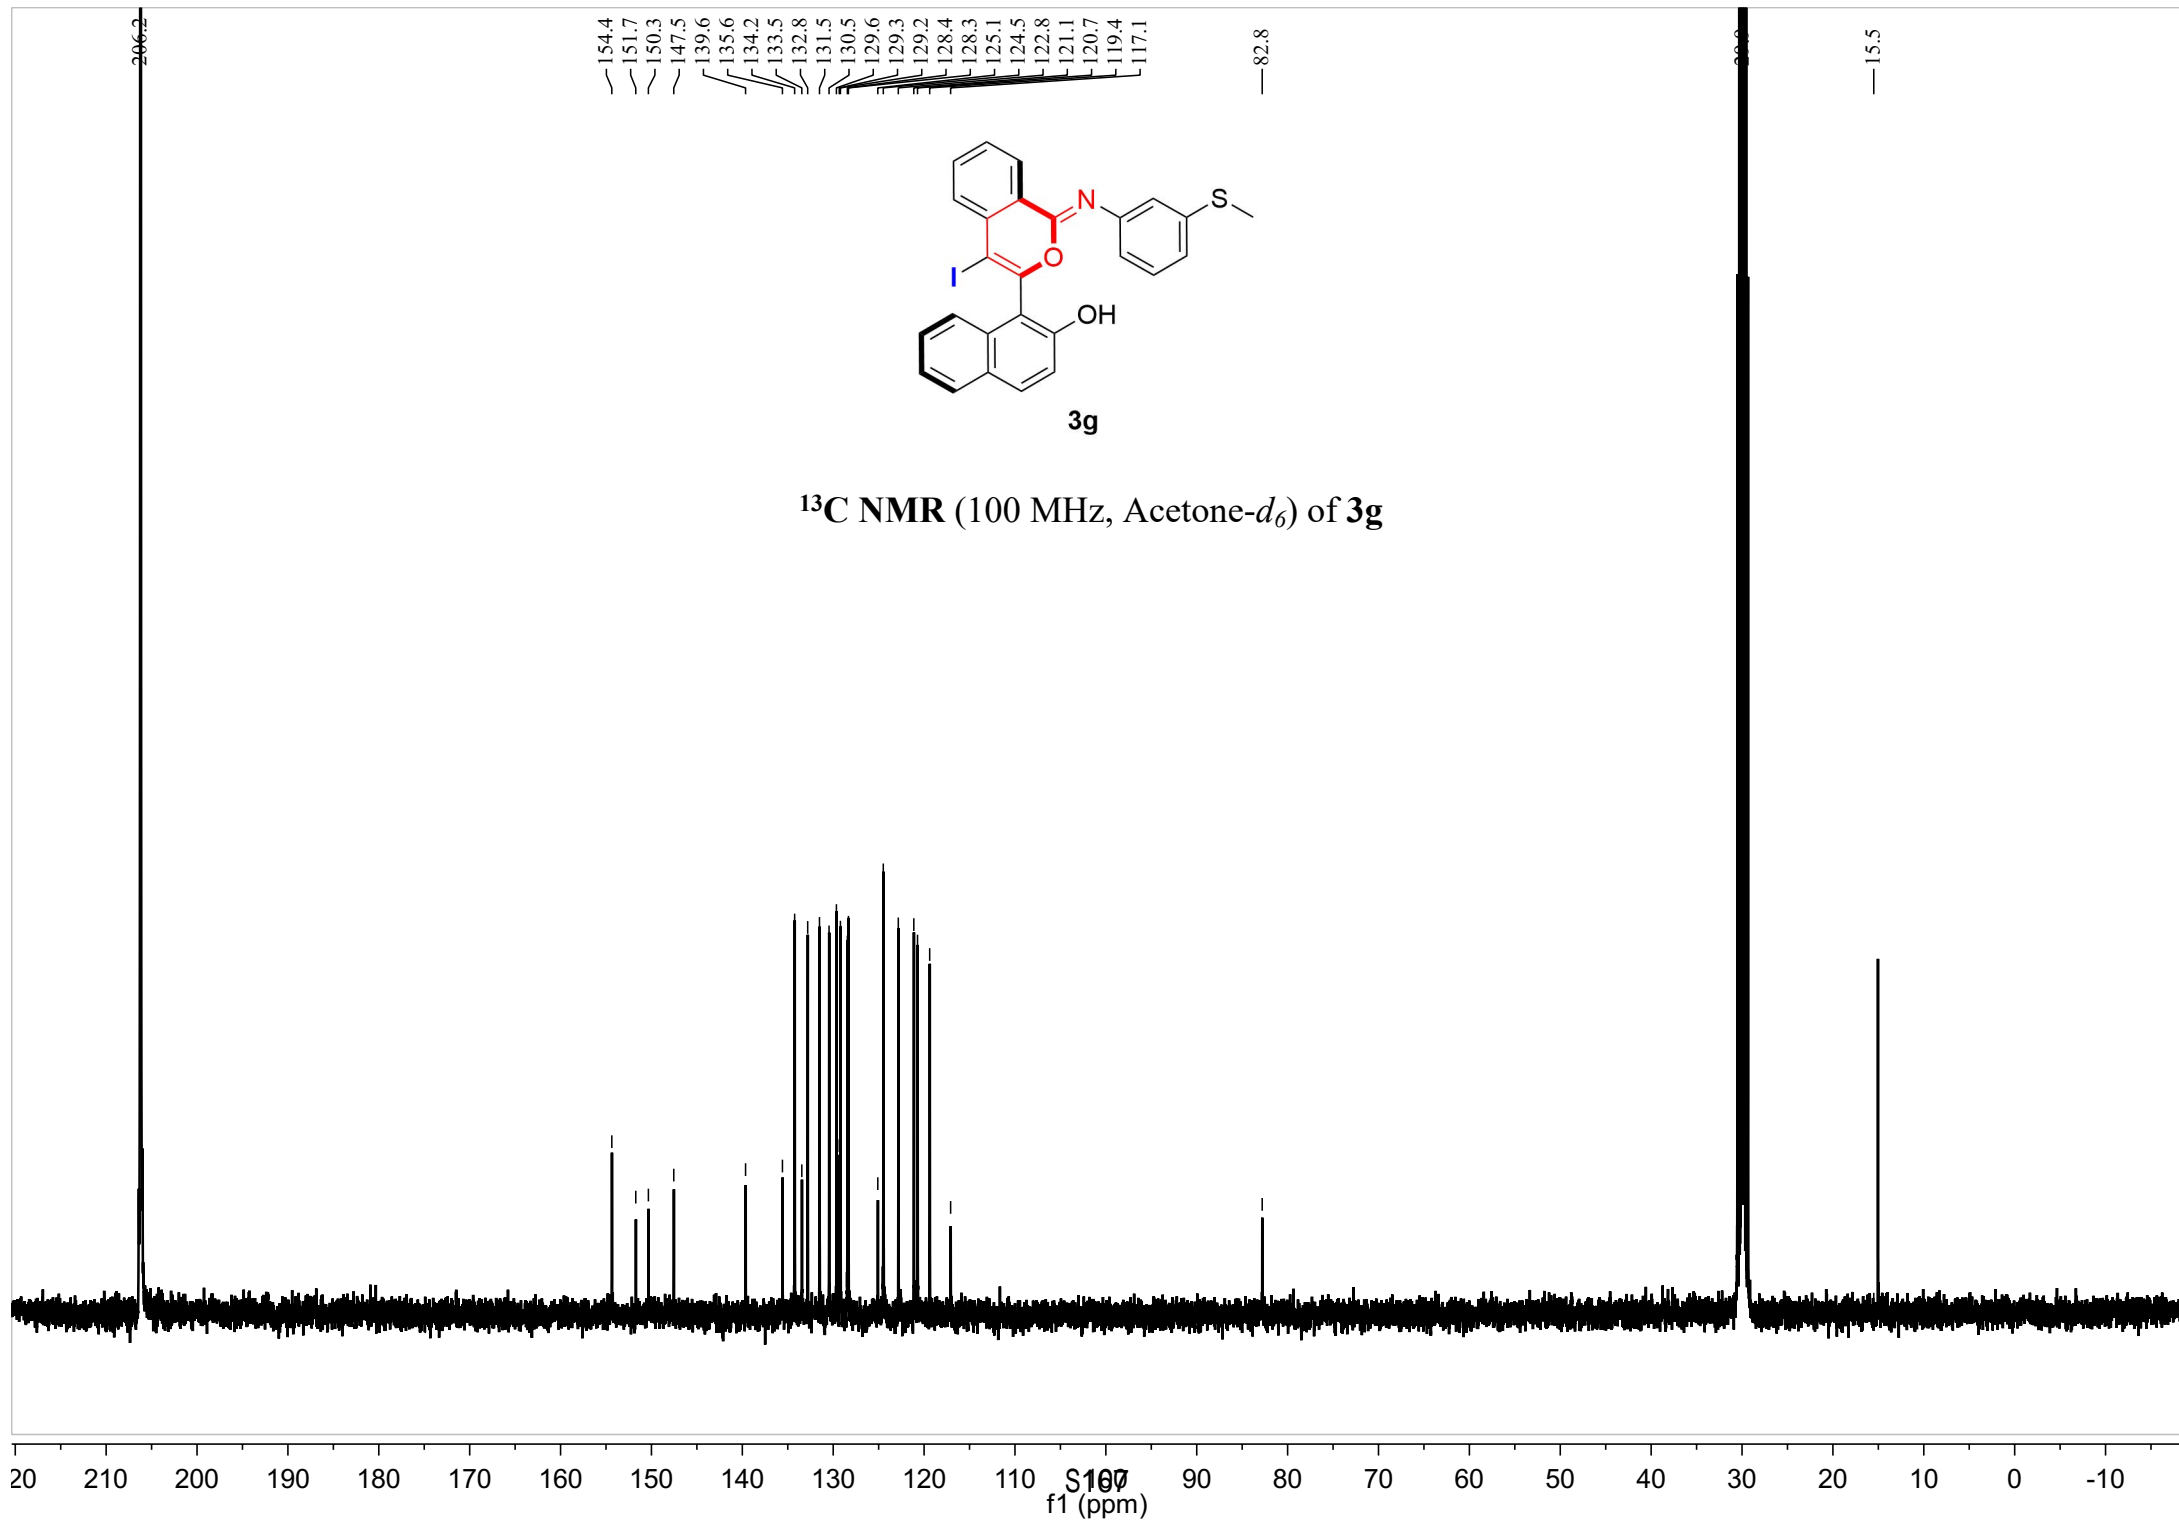

9.15  
8.42  
8.40  
7.93  
7.91  
7.87  
7.85  
7.82  
7.79  
7.77  
7.65  
7.51  
7.38  
7.36  
7.29  
7.26  
7.13  
7.12  
7.11  
7.10  
7.06  
7.05  
7.04  
2.87  
2.05

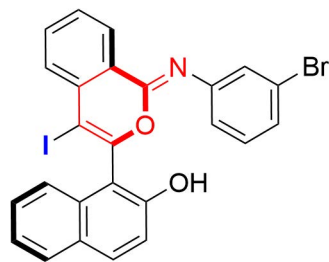

3h

<sup>1</sup>H NMR (400 MHz, Acetone-d<sub>6</sub>) of 3h

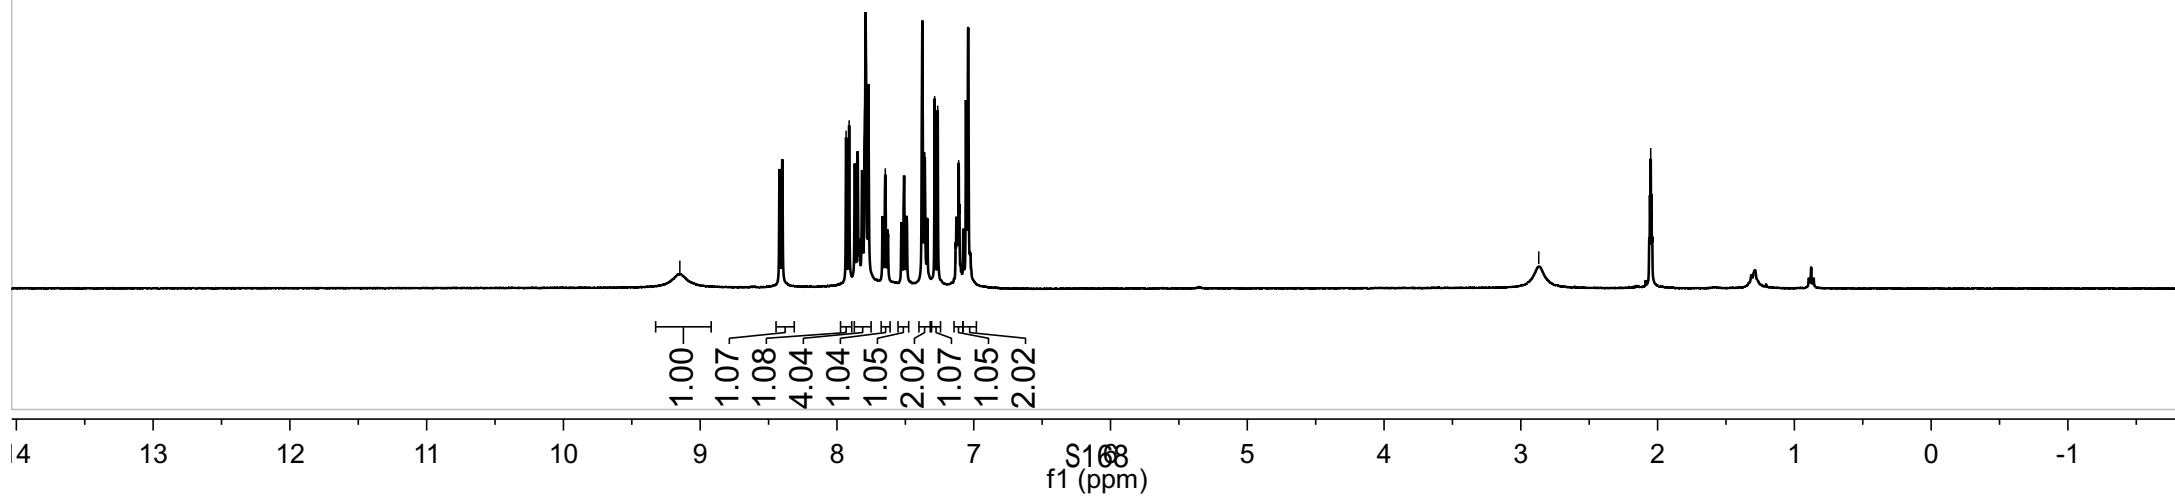



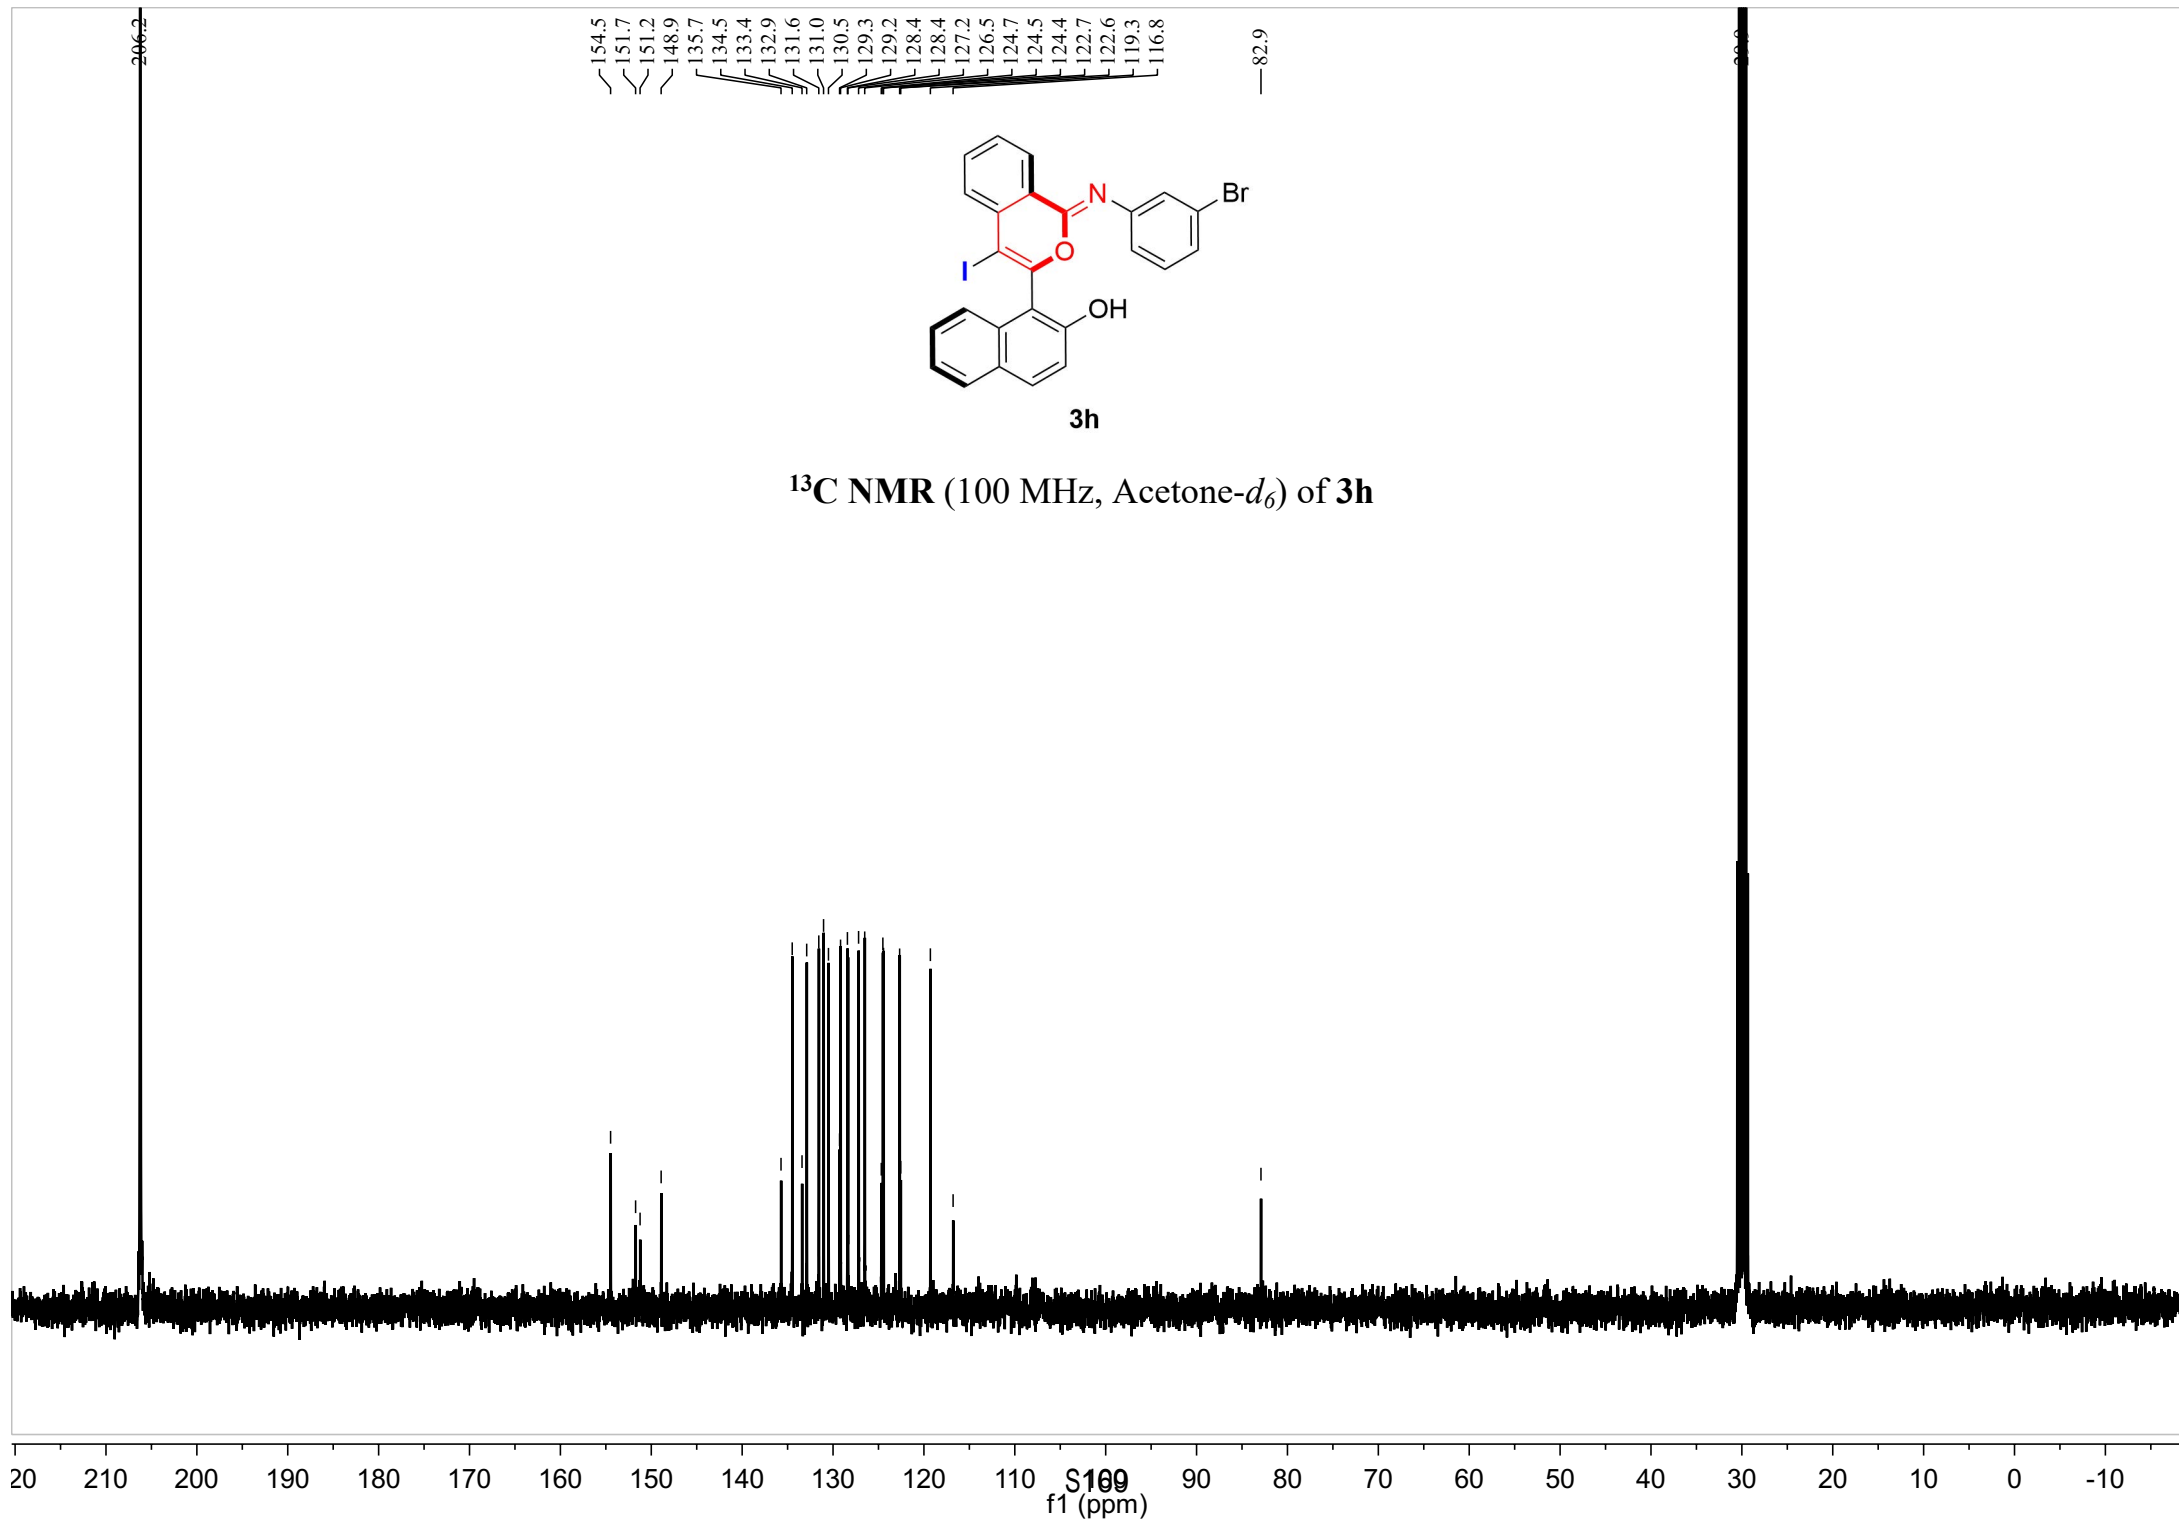

9.17 8.42 8.40 7.93 7.91 7.86 7.85 7.80 7.79 7.77 7.37 7.36 7.29 7.27 7.23 7.22 7.22 7.11 7.09 7.08 6.90 6.88 2.05

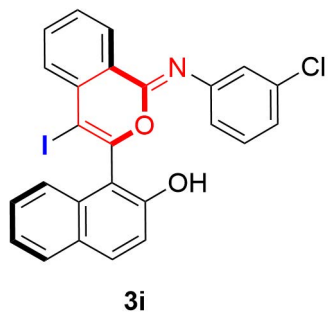

<sup>1</sup>H NMR (400 MHz, Acetone-d<sub>6</sub>) of **3i**

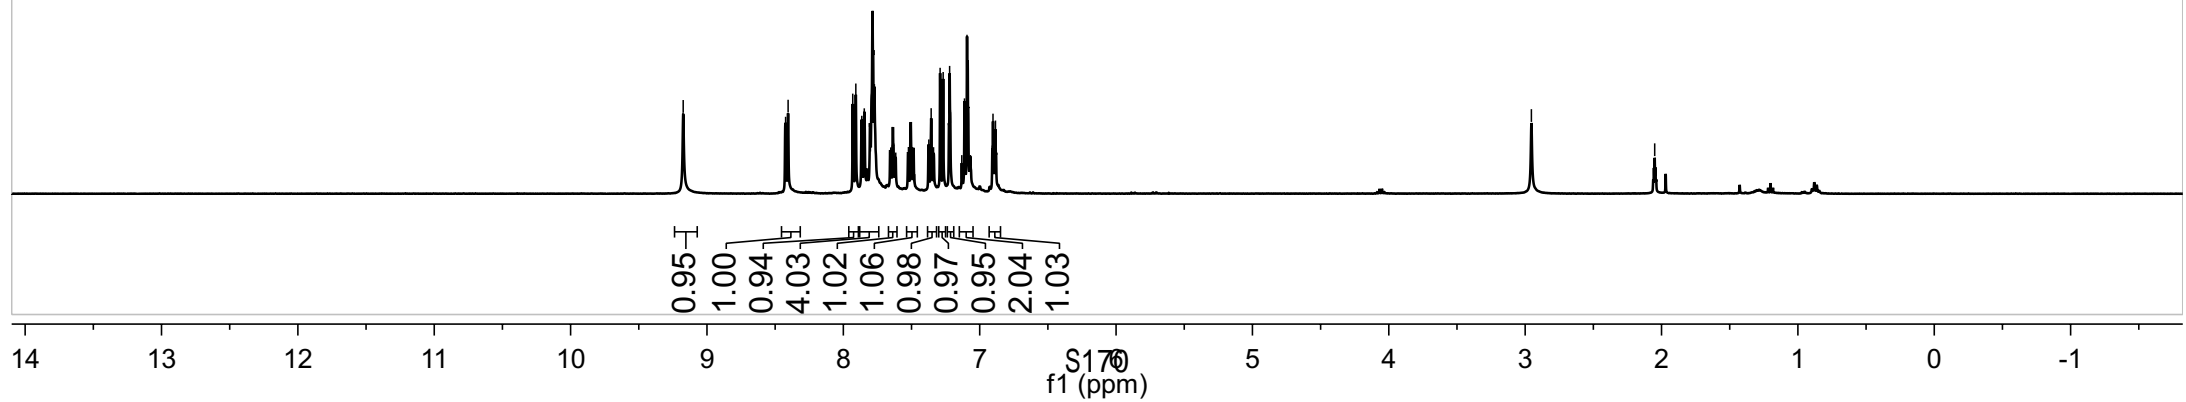

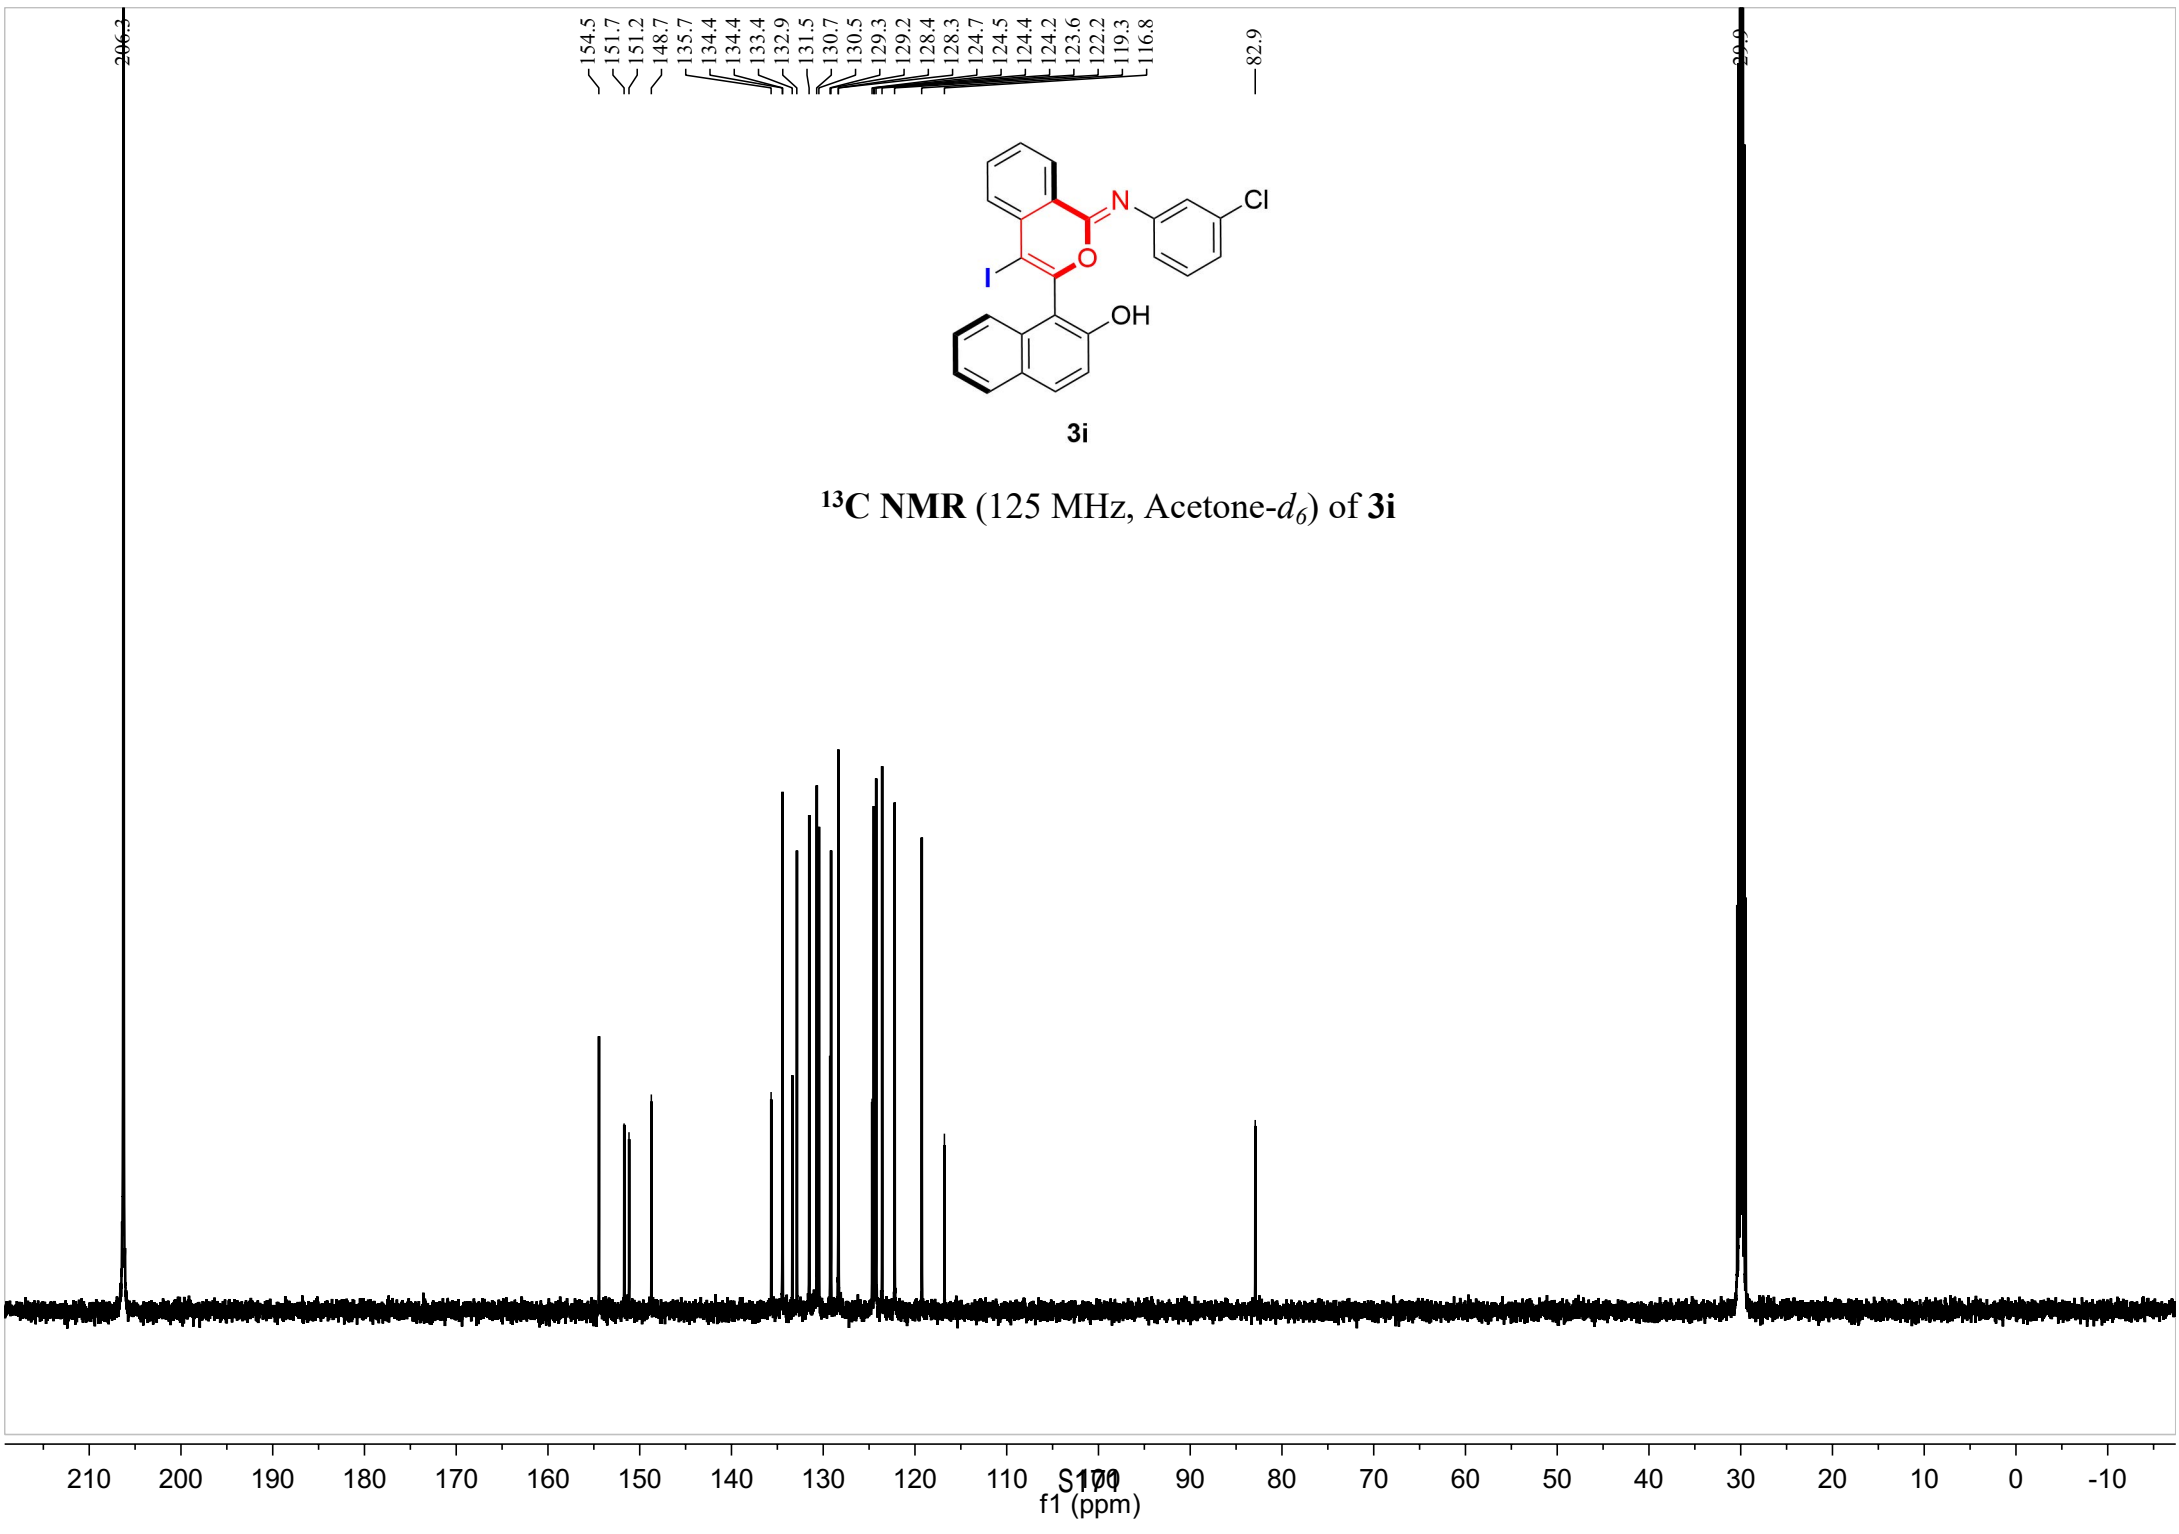

9.11  
8.42  
8.40  
7.94  
7.91  
7.88  
7.86  
7.77  
7.75  
7.62  
7.52  
7.50  
7.48  
7.38  
7.36  
7.34  
7.28  
7.26  
7.12  
7.10  
6.95  
6.93  
2.82  
2.48  
2.46  
2.44  
2.42  
2.05  
1.09  
1.07  
1.05

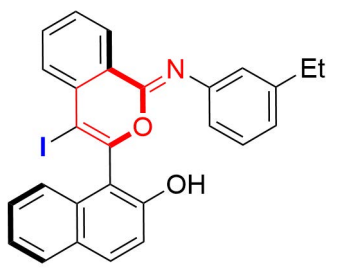

3j

<sup>1</sup>H NMR (400 MHz, Acetone-d<sub>6</sub>) of 3j

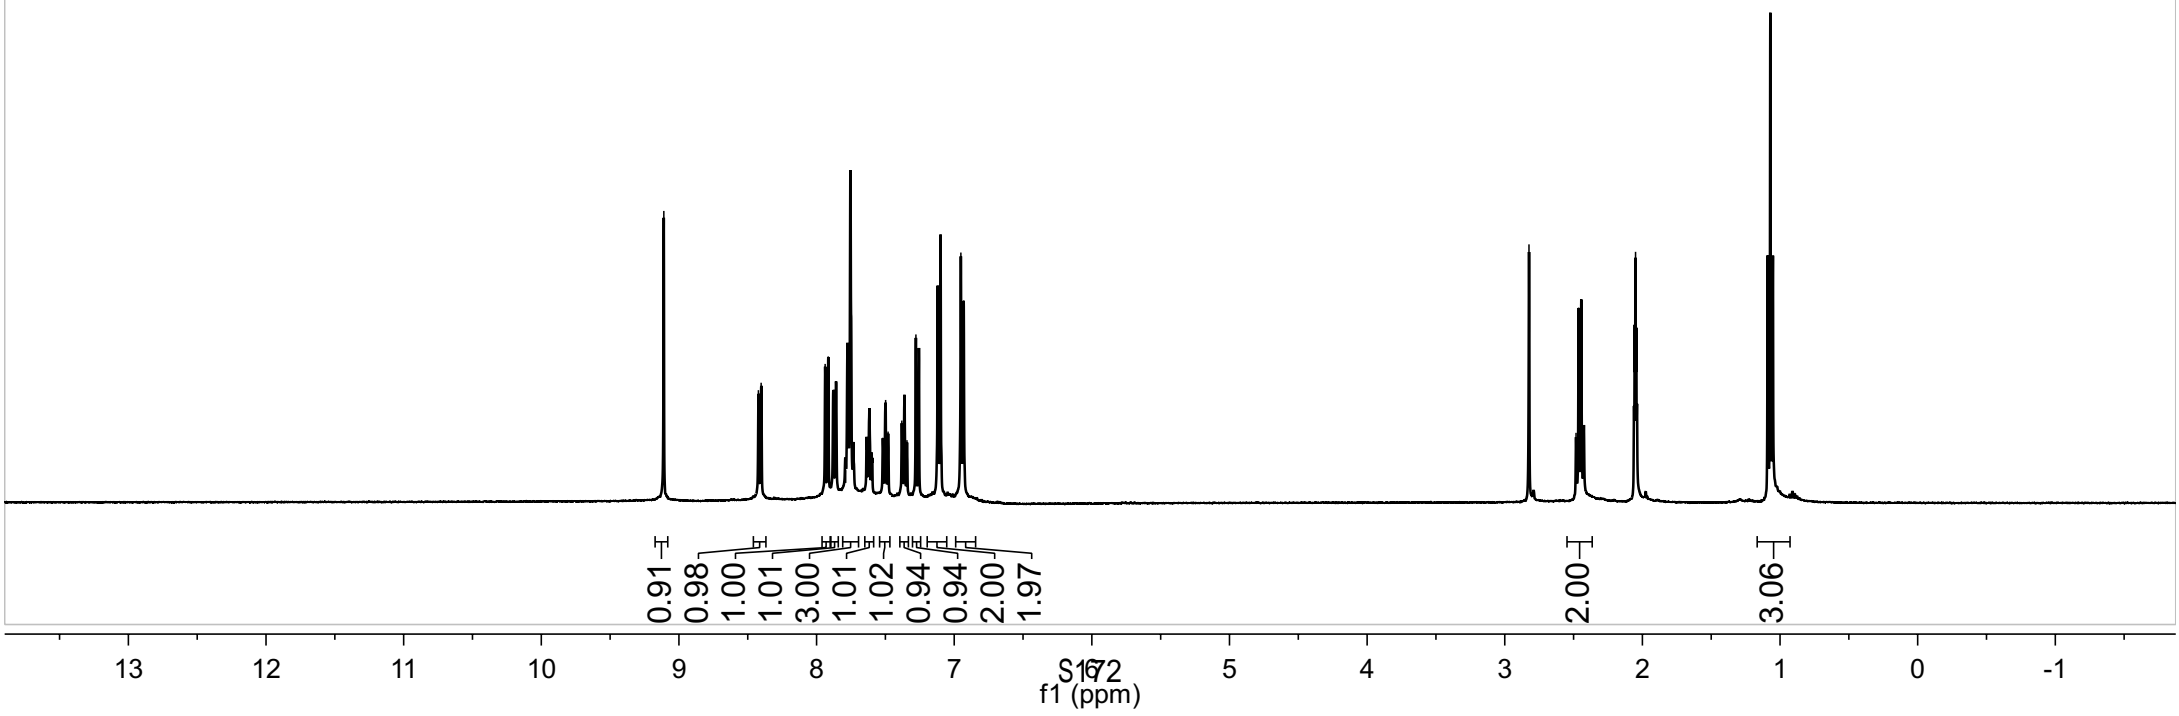

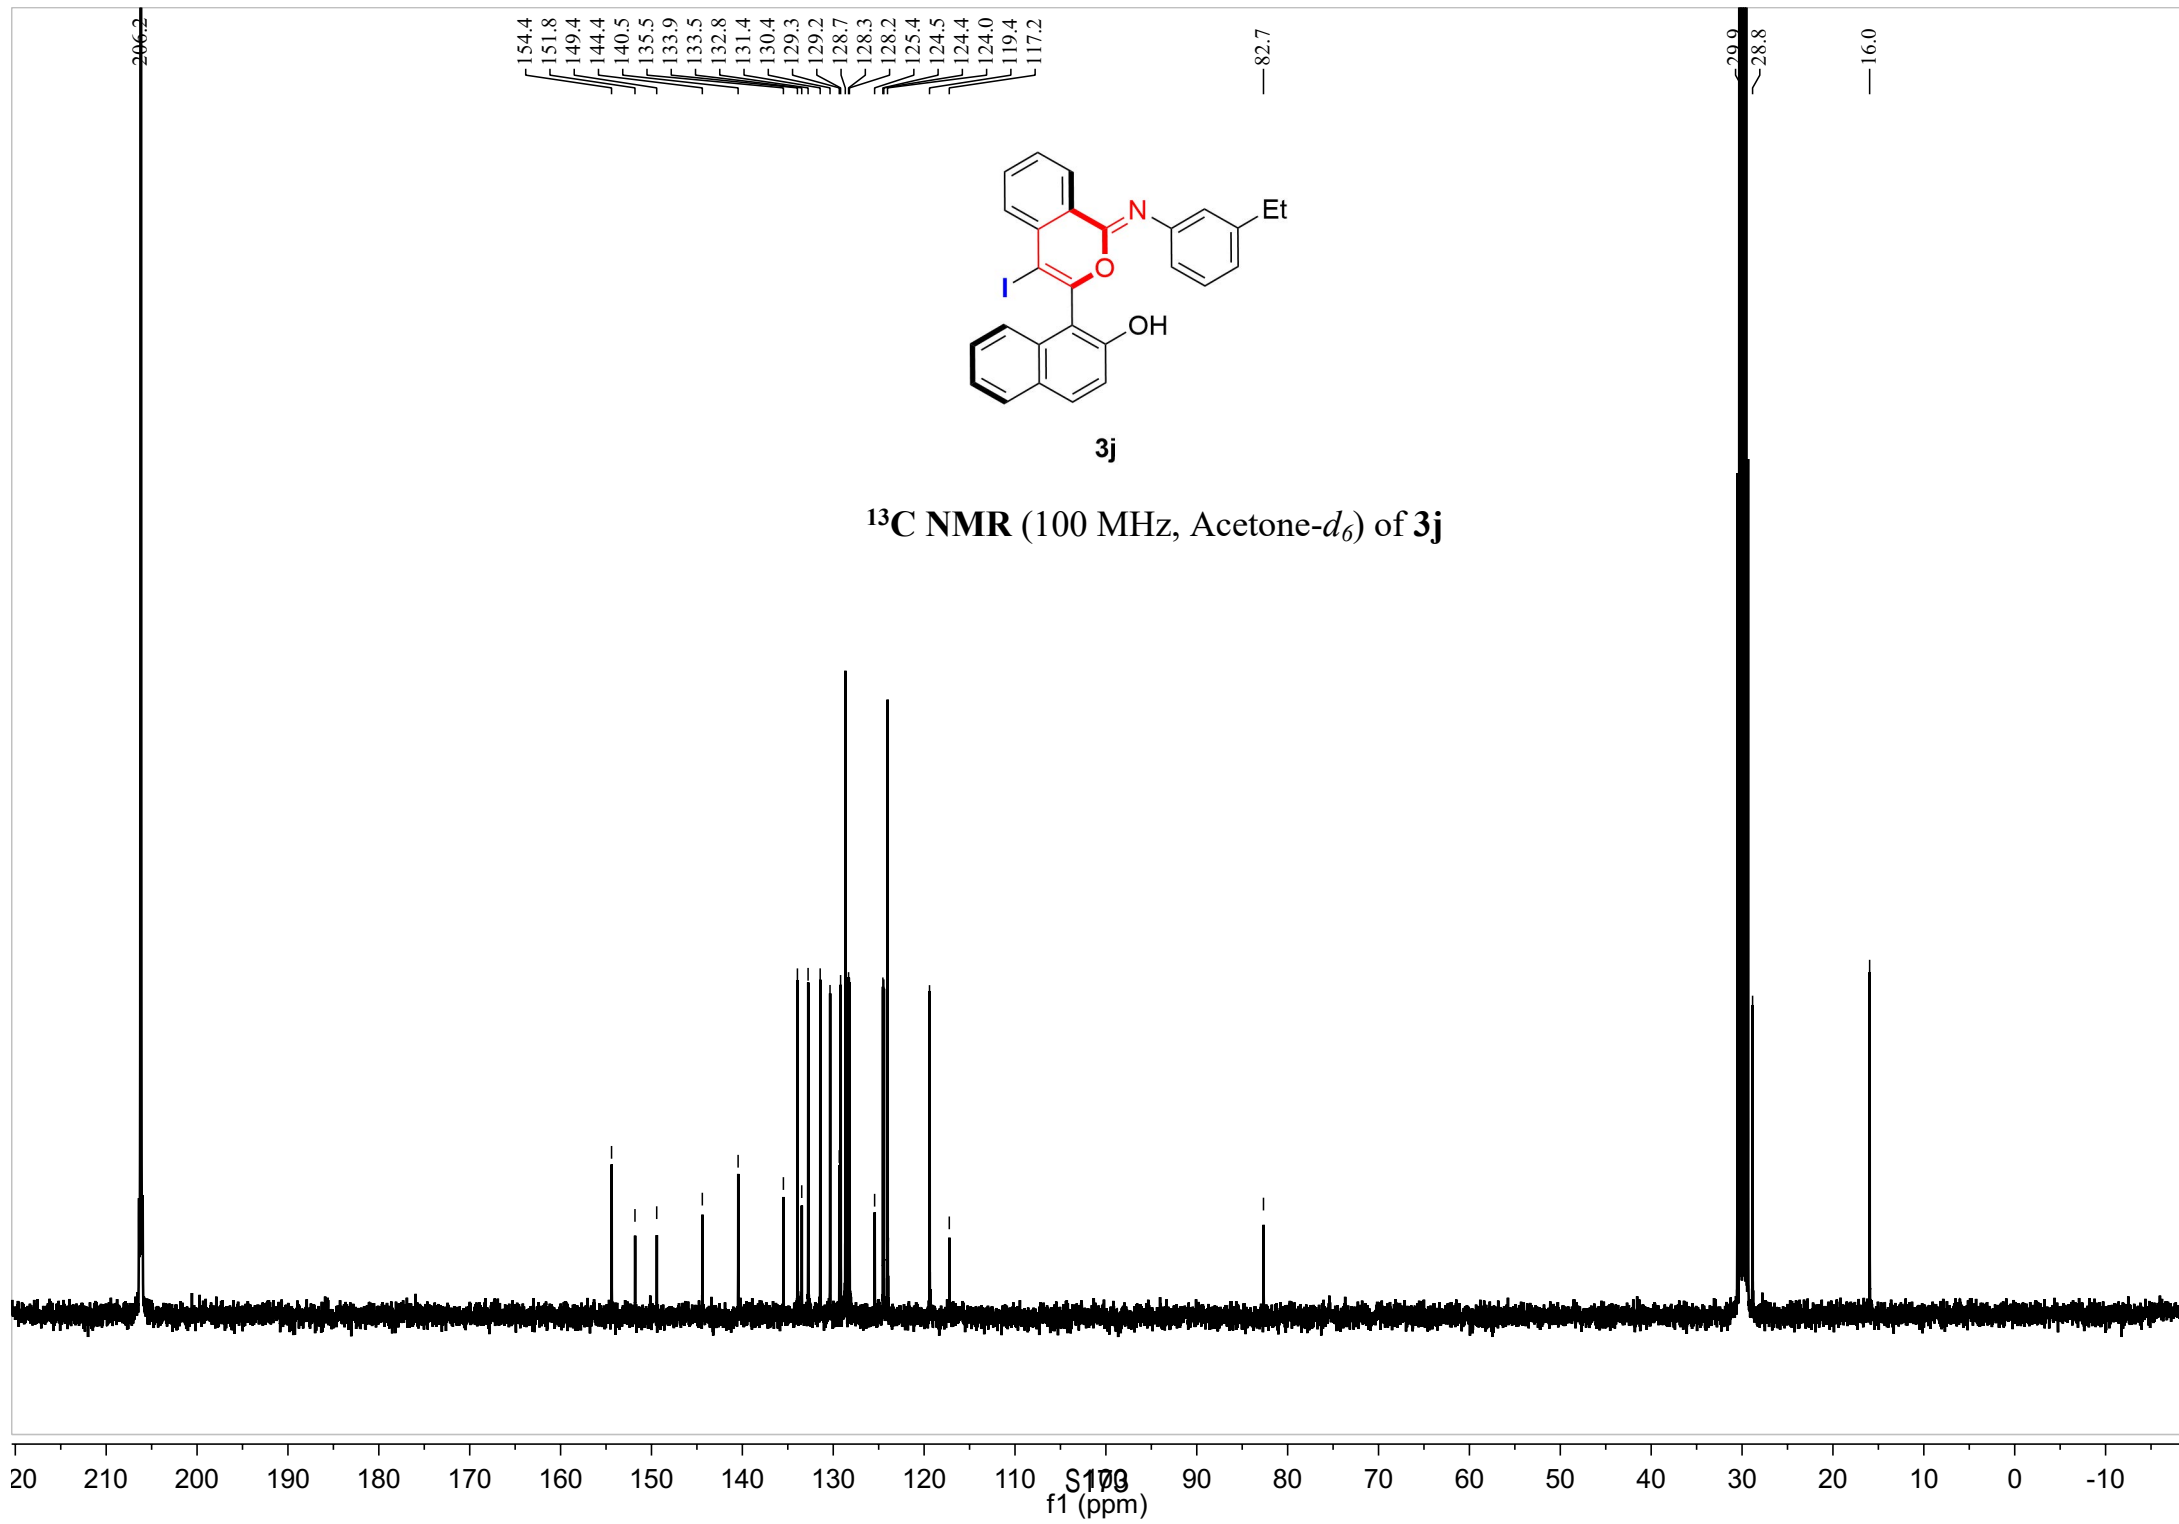

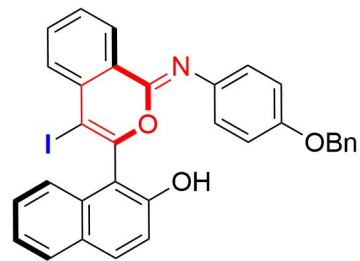

**3k**

<sup>1</sup>H NMR (400 MHz, DMSO-*d*<sub>6</sub>) of **3k**

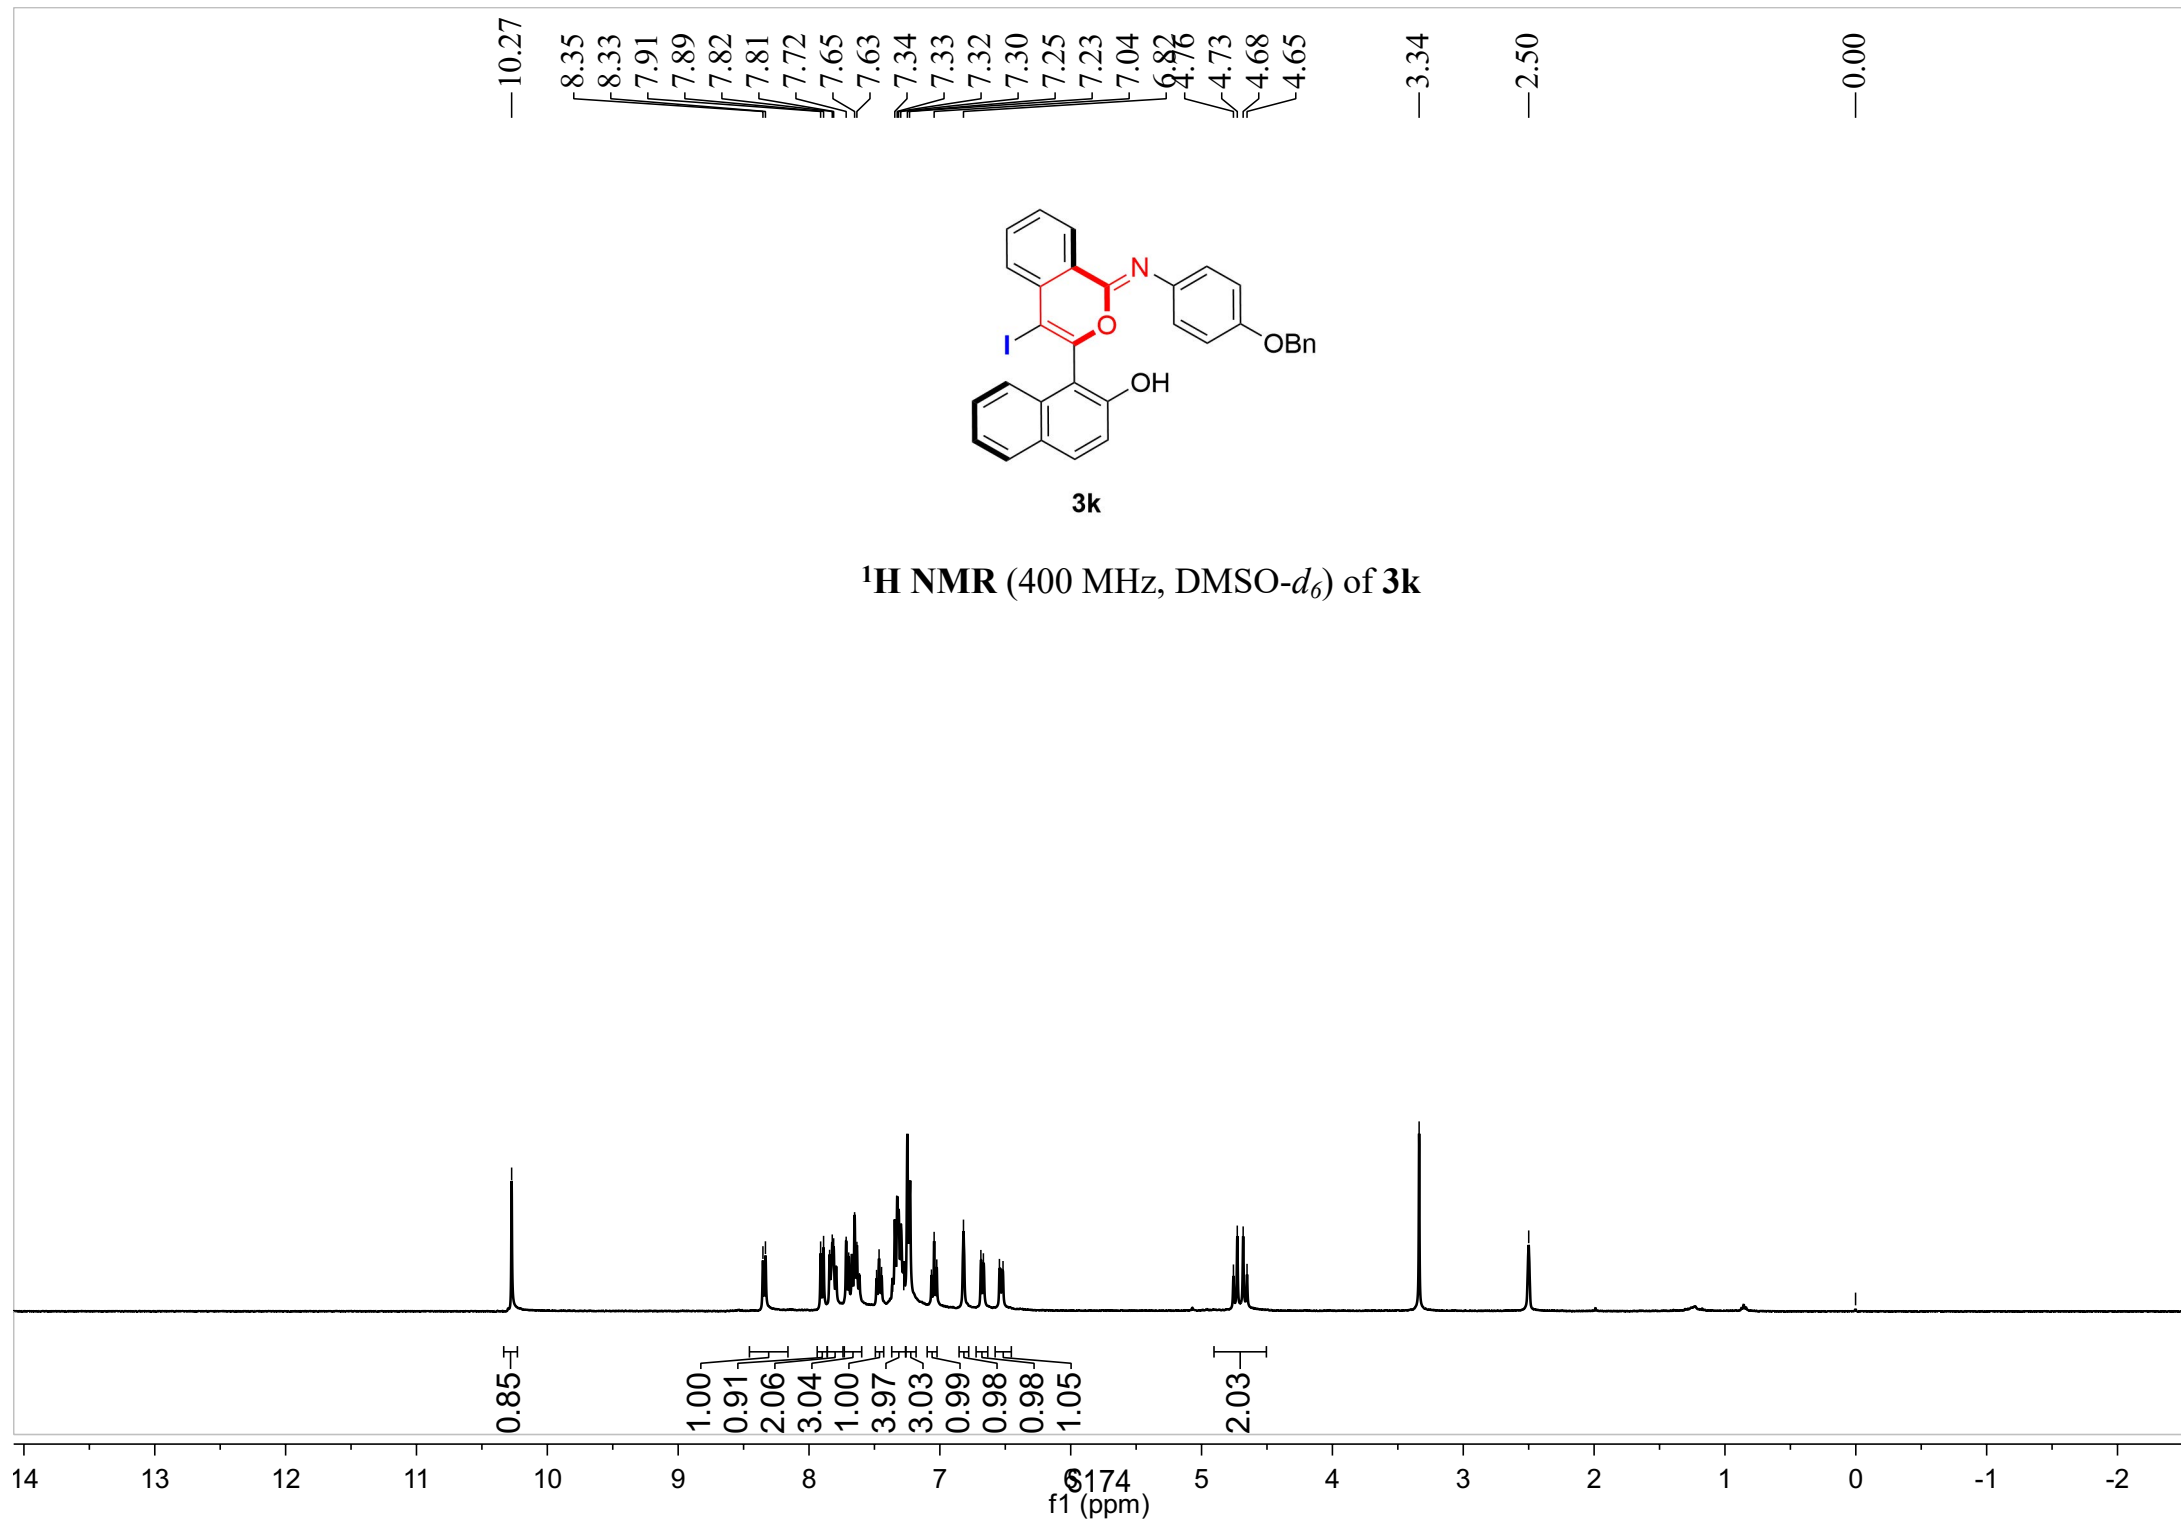

158.4  
153.6  
150.5  
149.2  
146.8  
136.9  
134.3  
133.6  
132.0  
131.6  
130.2  
129.5  
129.2  
128.3  
128.1  
127.7  
127.6  
127.4  
127.4  
127.0  
123.3  
123.2  
123.2  
118.4  
115.7  
114.9  
110.9  
108.2  
82.3  
68.8

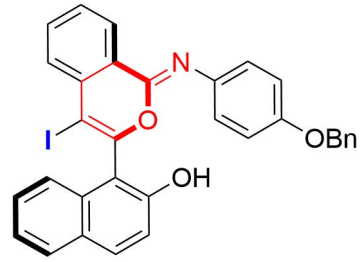

3k

<sup>13</sup>C NMR (100 MHz, DMSO-*d*<sub>6</sub>) of 3k

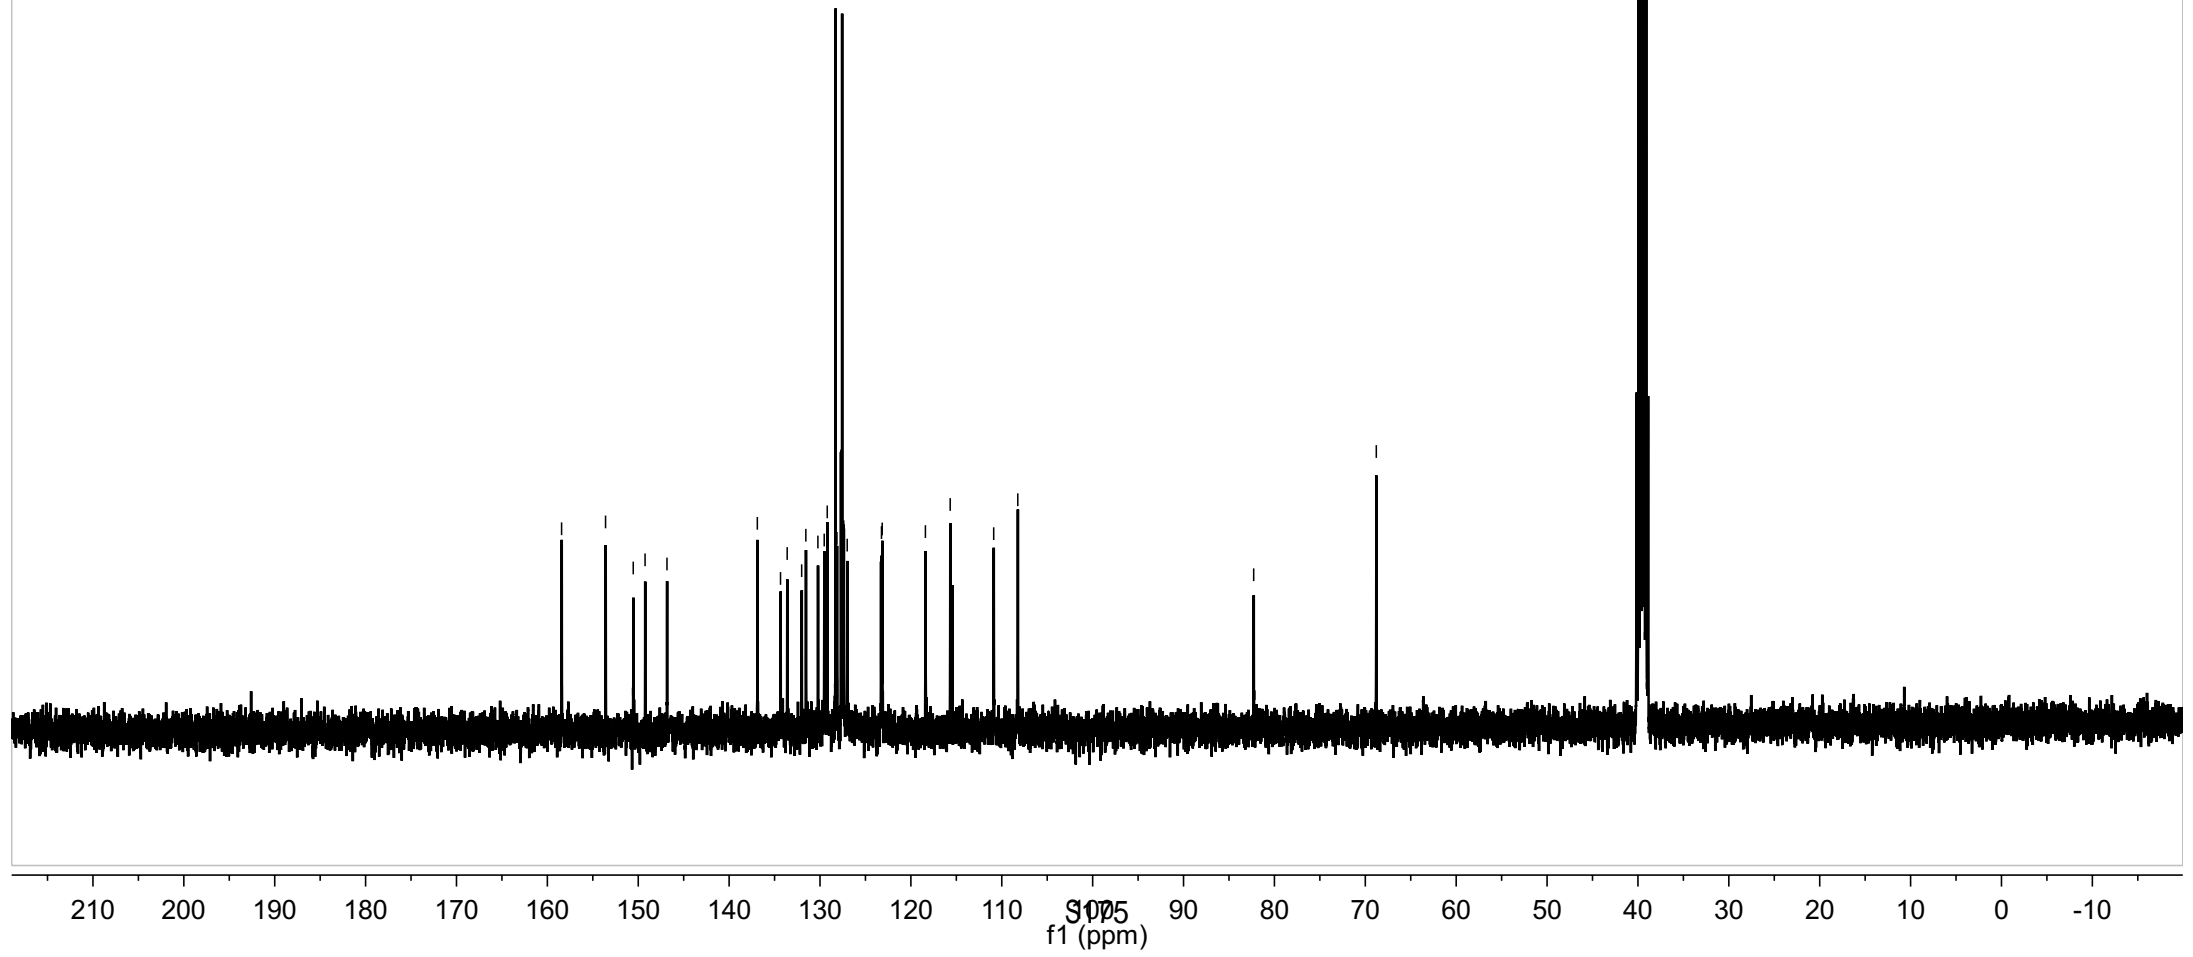

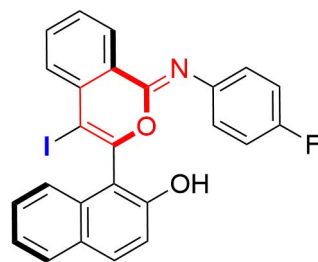

3I

<sup>1</sup>H NMR (400 MHz, Acetone-*d*<sub>6</sub>) of 3I

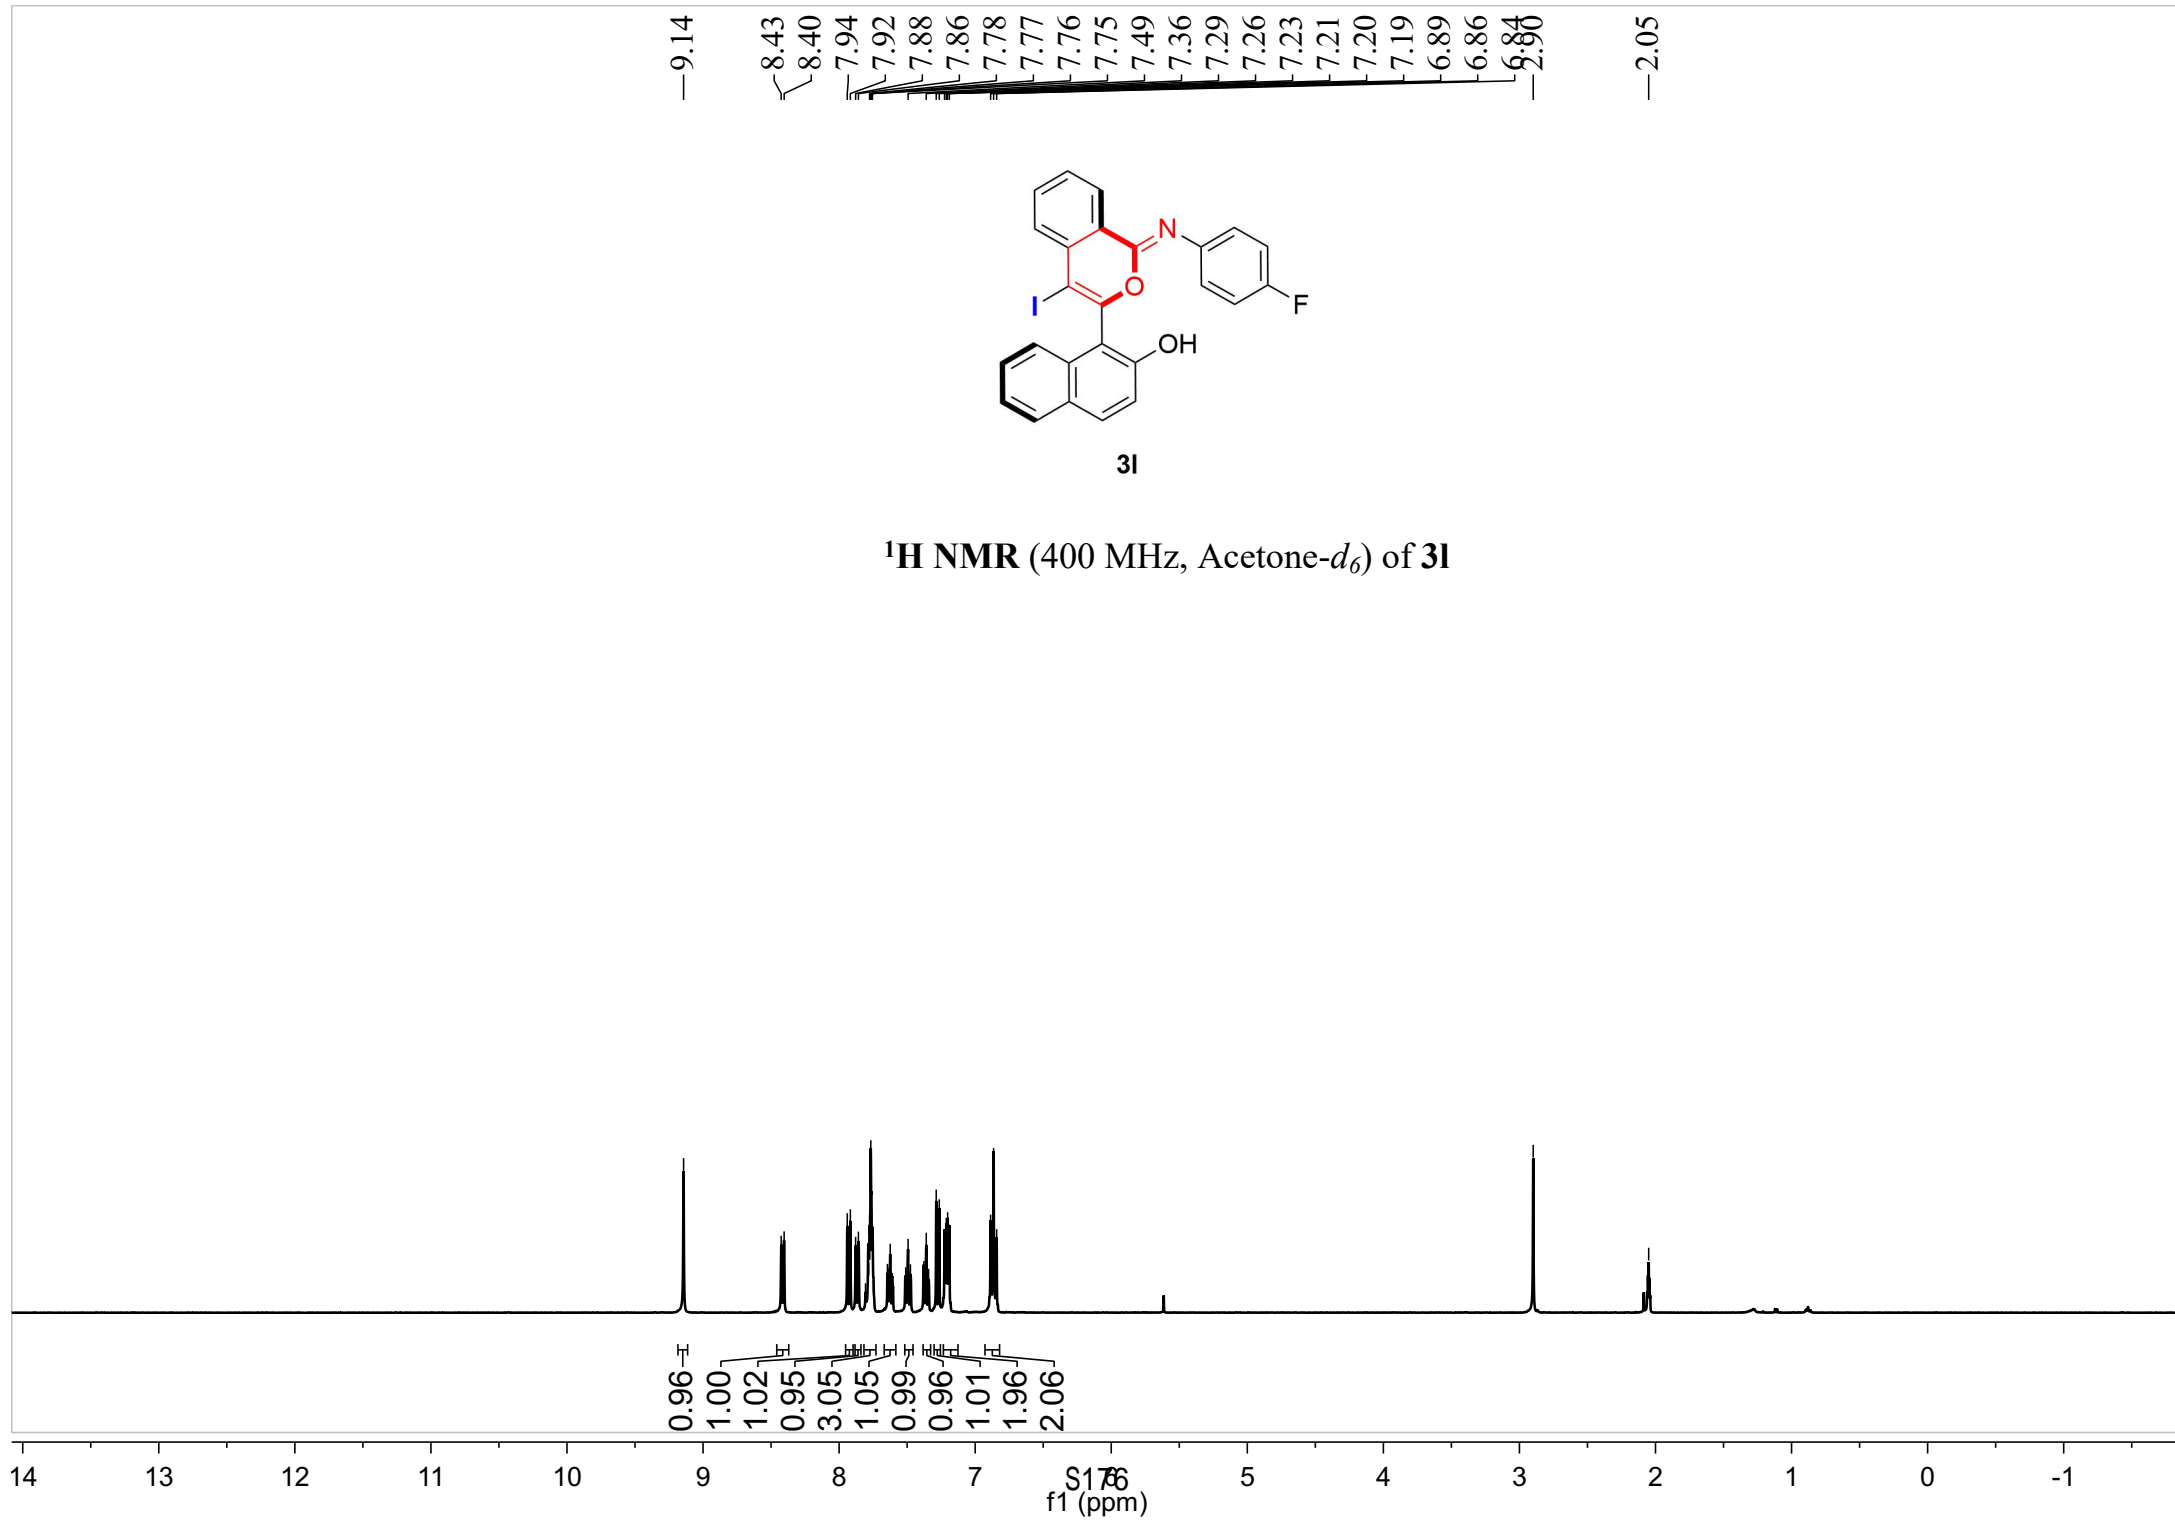



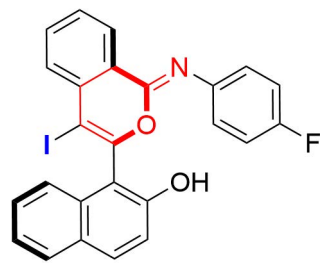

**31**

**<sup>19</sup>F NMR (376 MHz, Acetone-*d*<sub>6</sub>) of 31**

--120.99

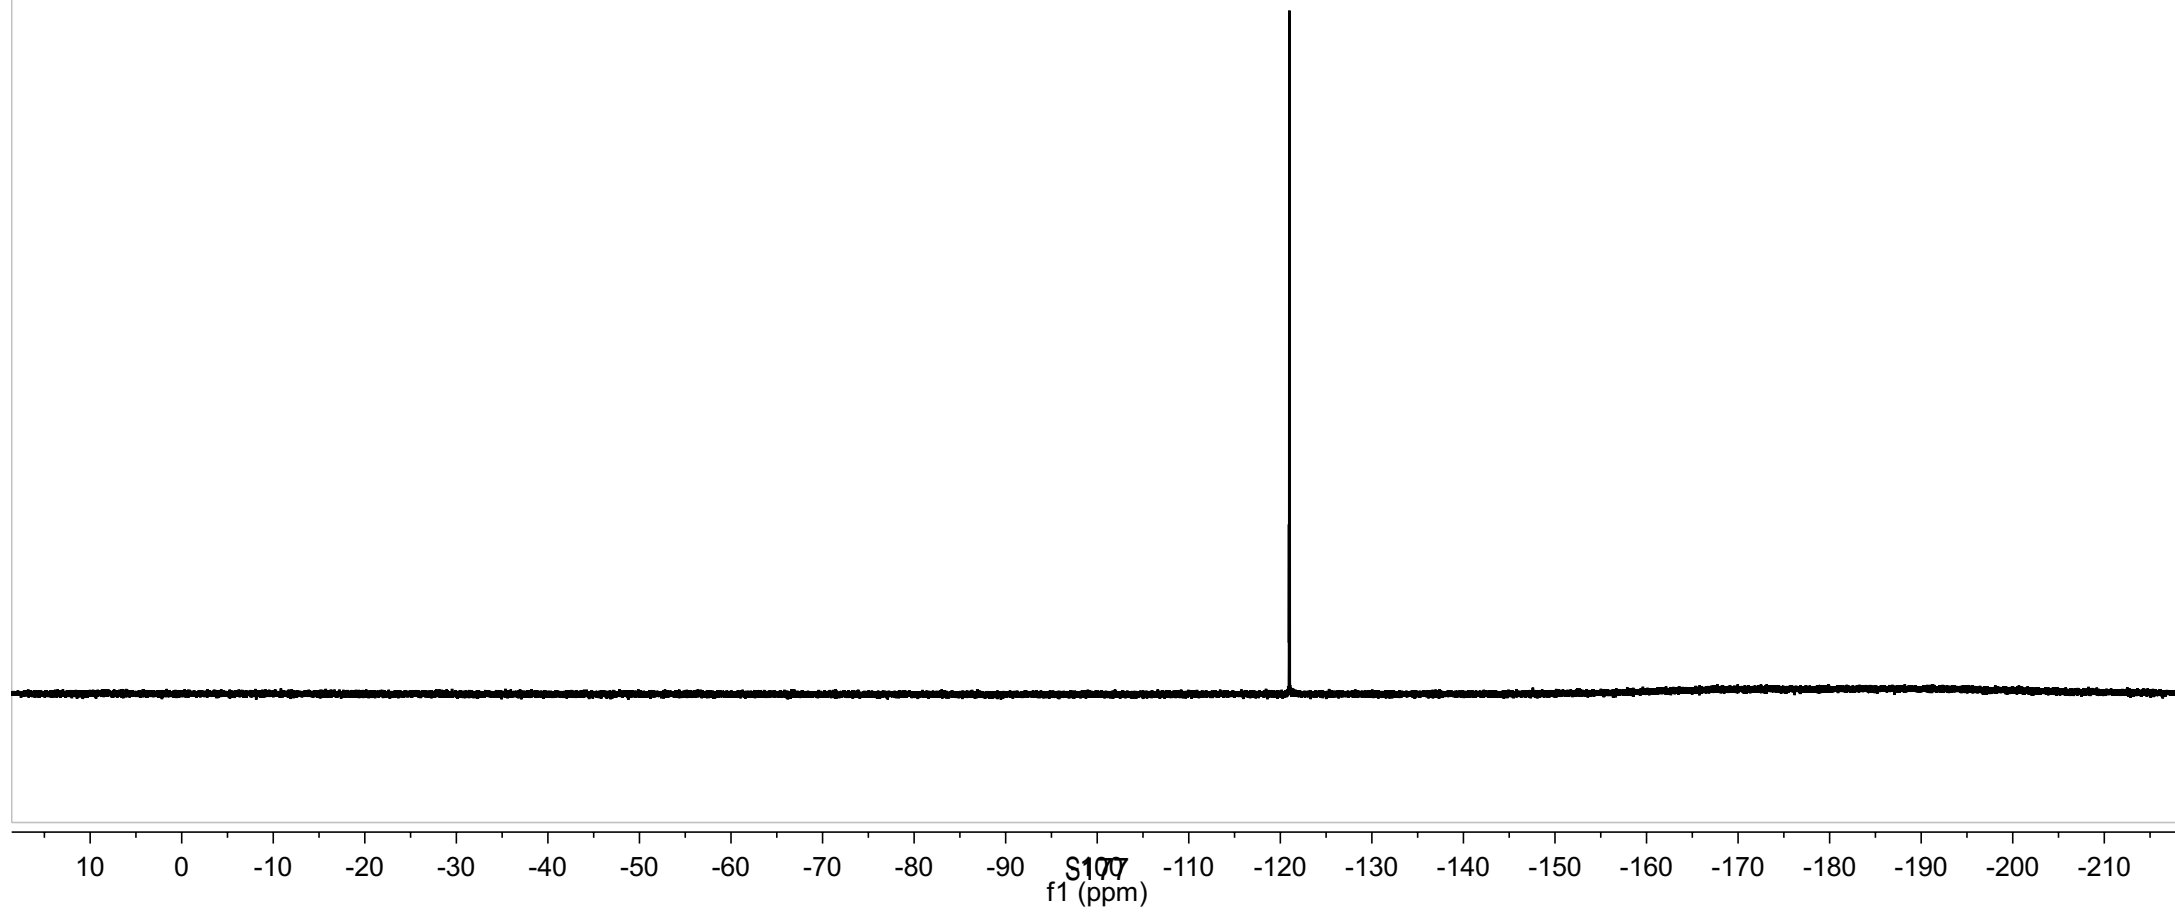

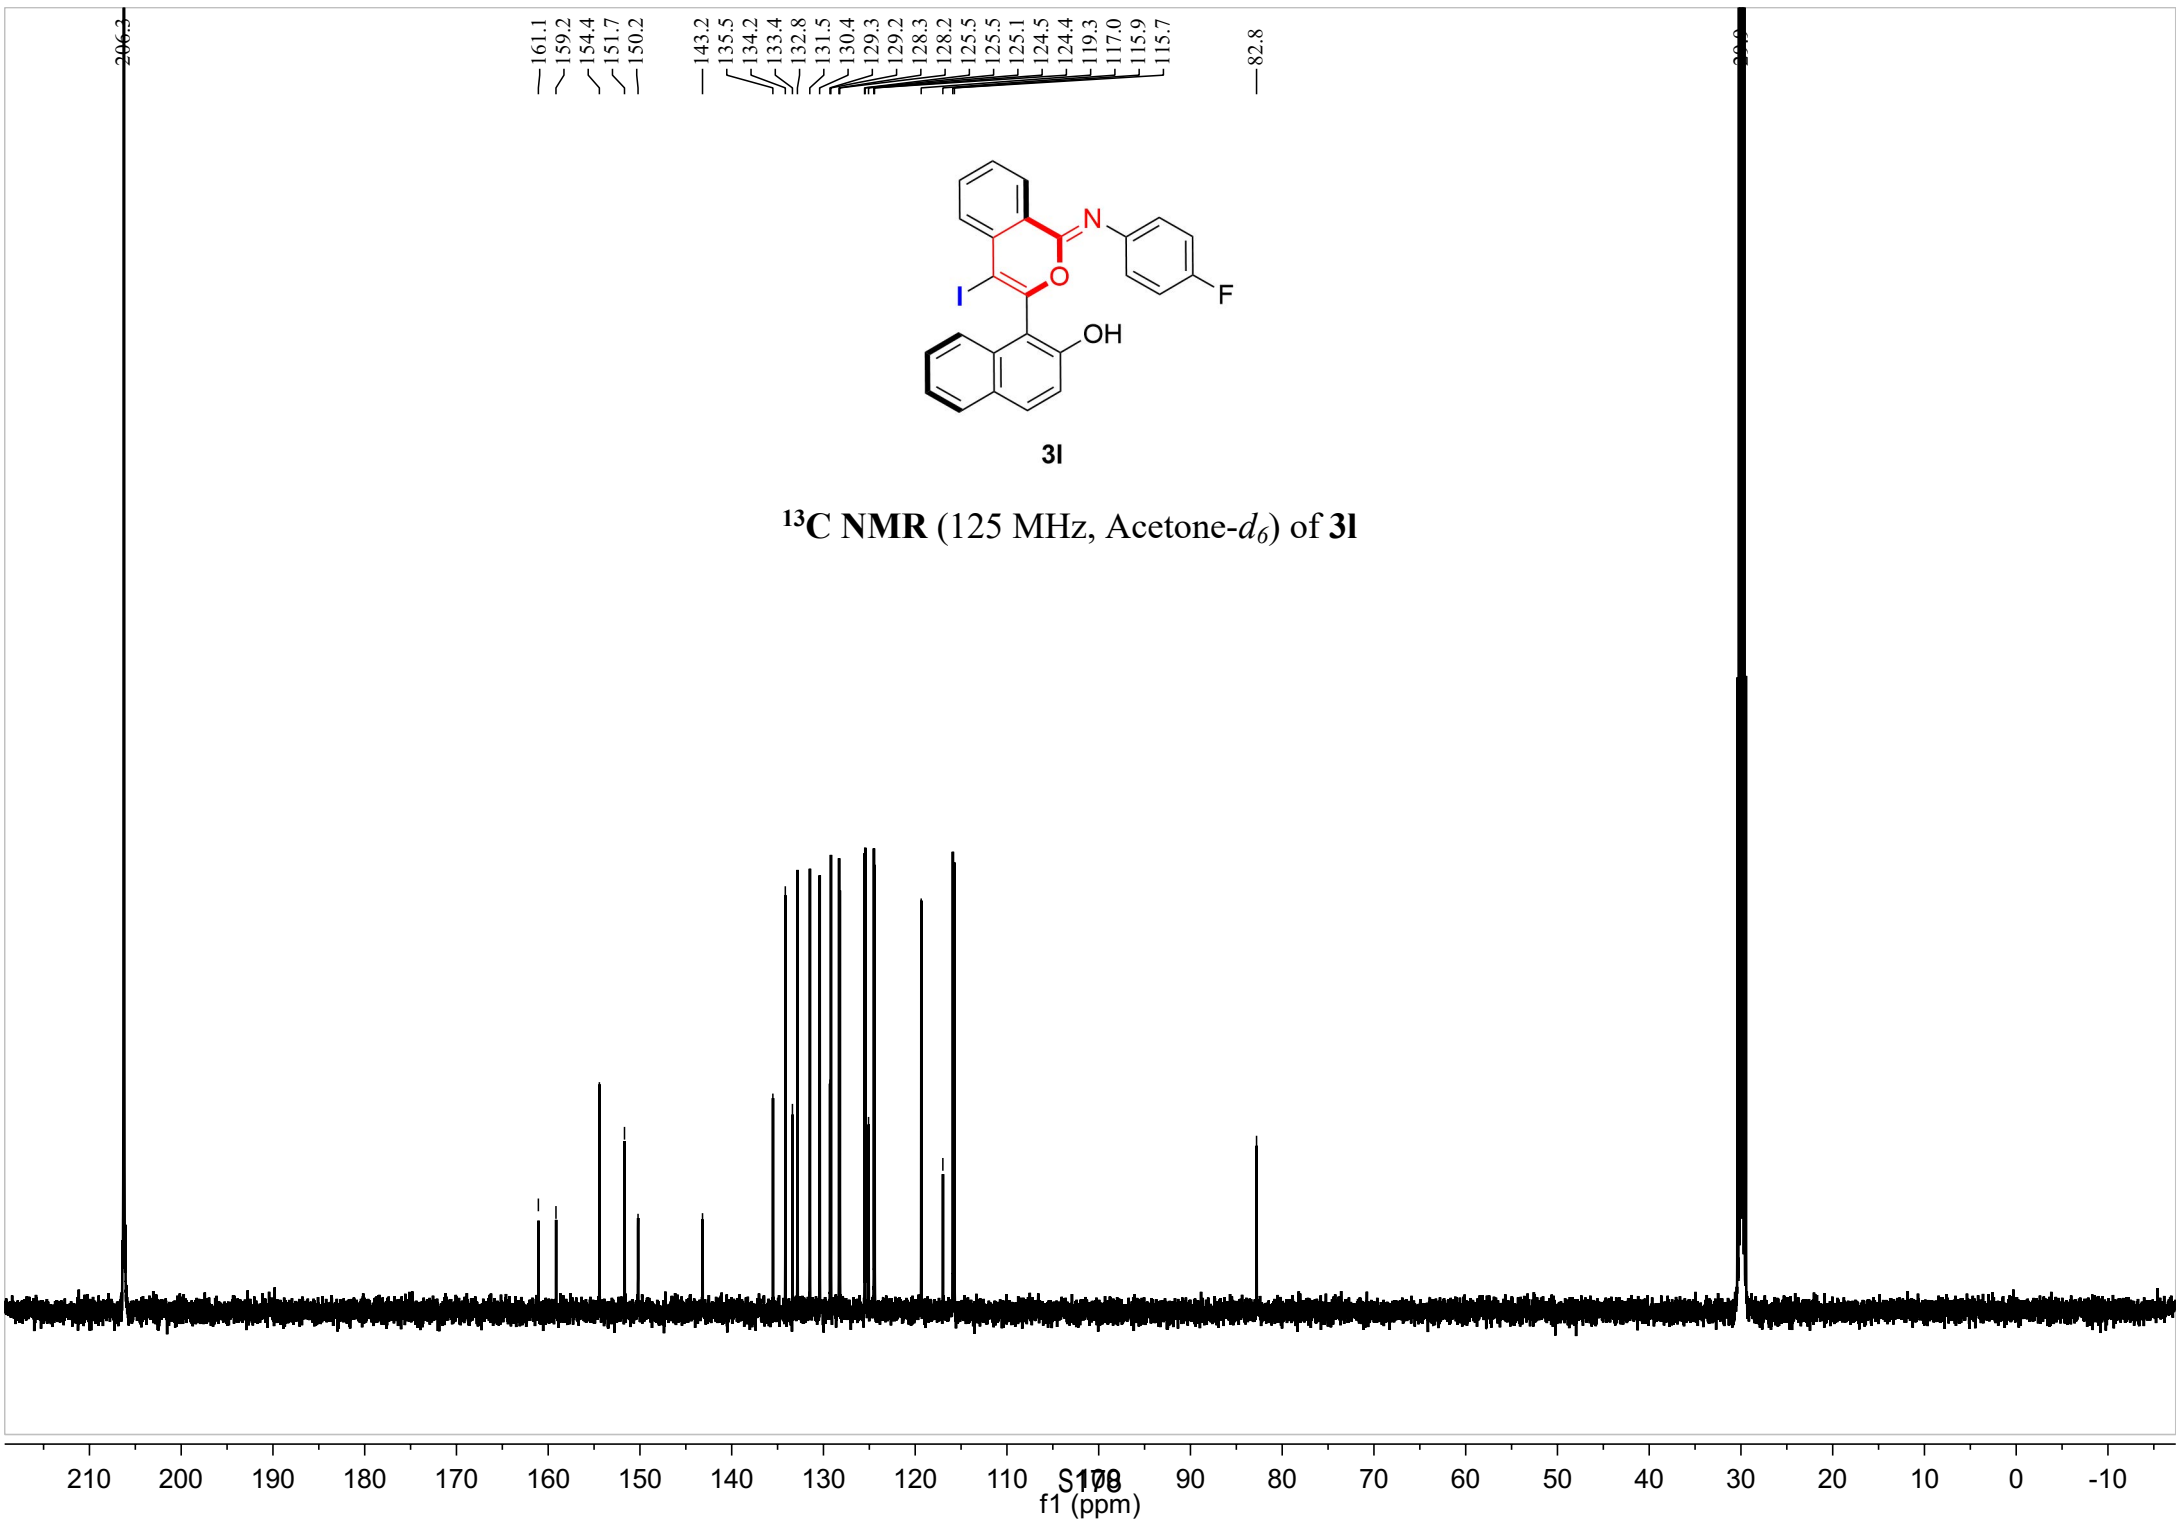

9.15 8.42 8.40 7.93 7.91 7.87 7.85 7.78 7.77 7.76 7.62 7.49 7.37 7.36 7.28 7.26 7.18 7.17 7.16 7.12 7.12 7.10 2.05

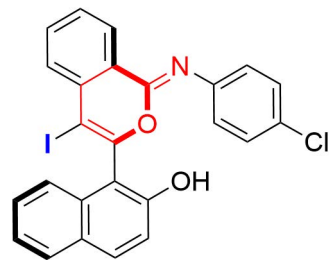

3m

$^1\text{H}$  NMR (400 MHz, Acetone- $d_6$ ) of 3m

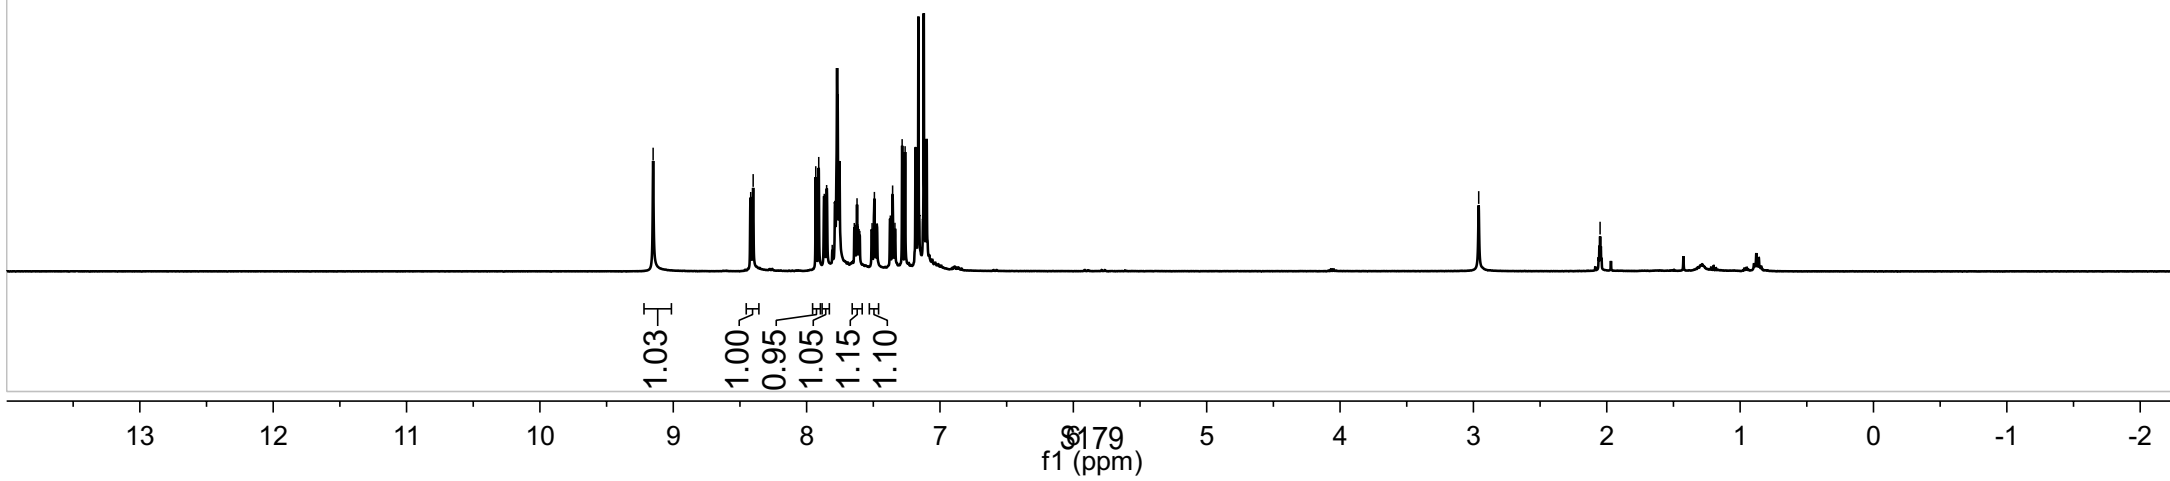

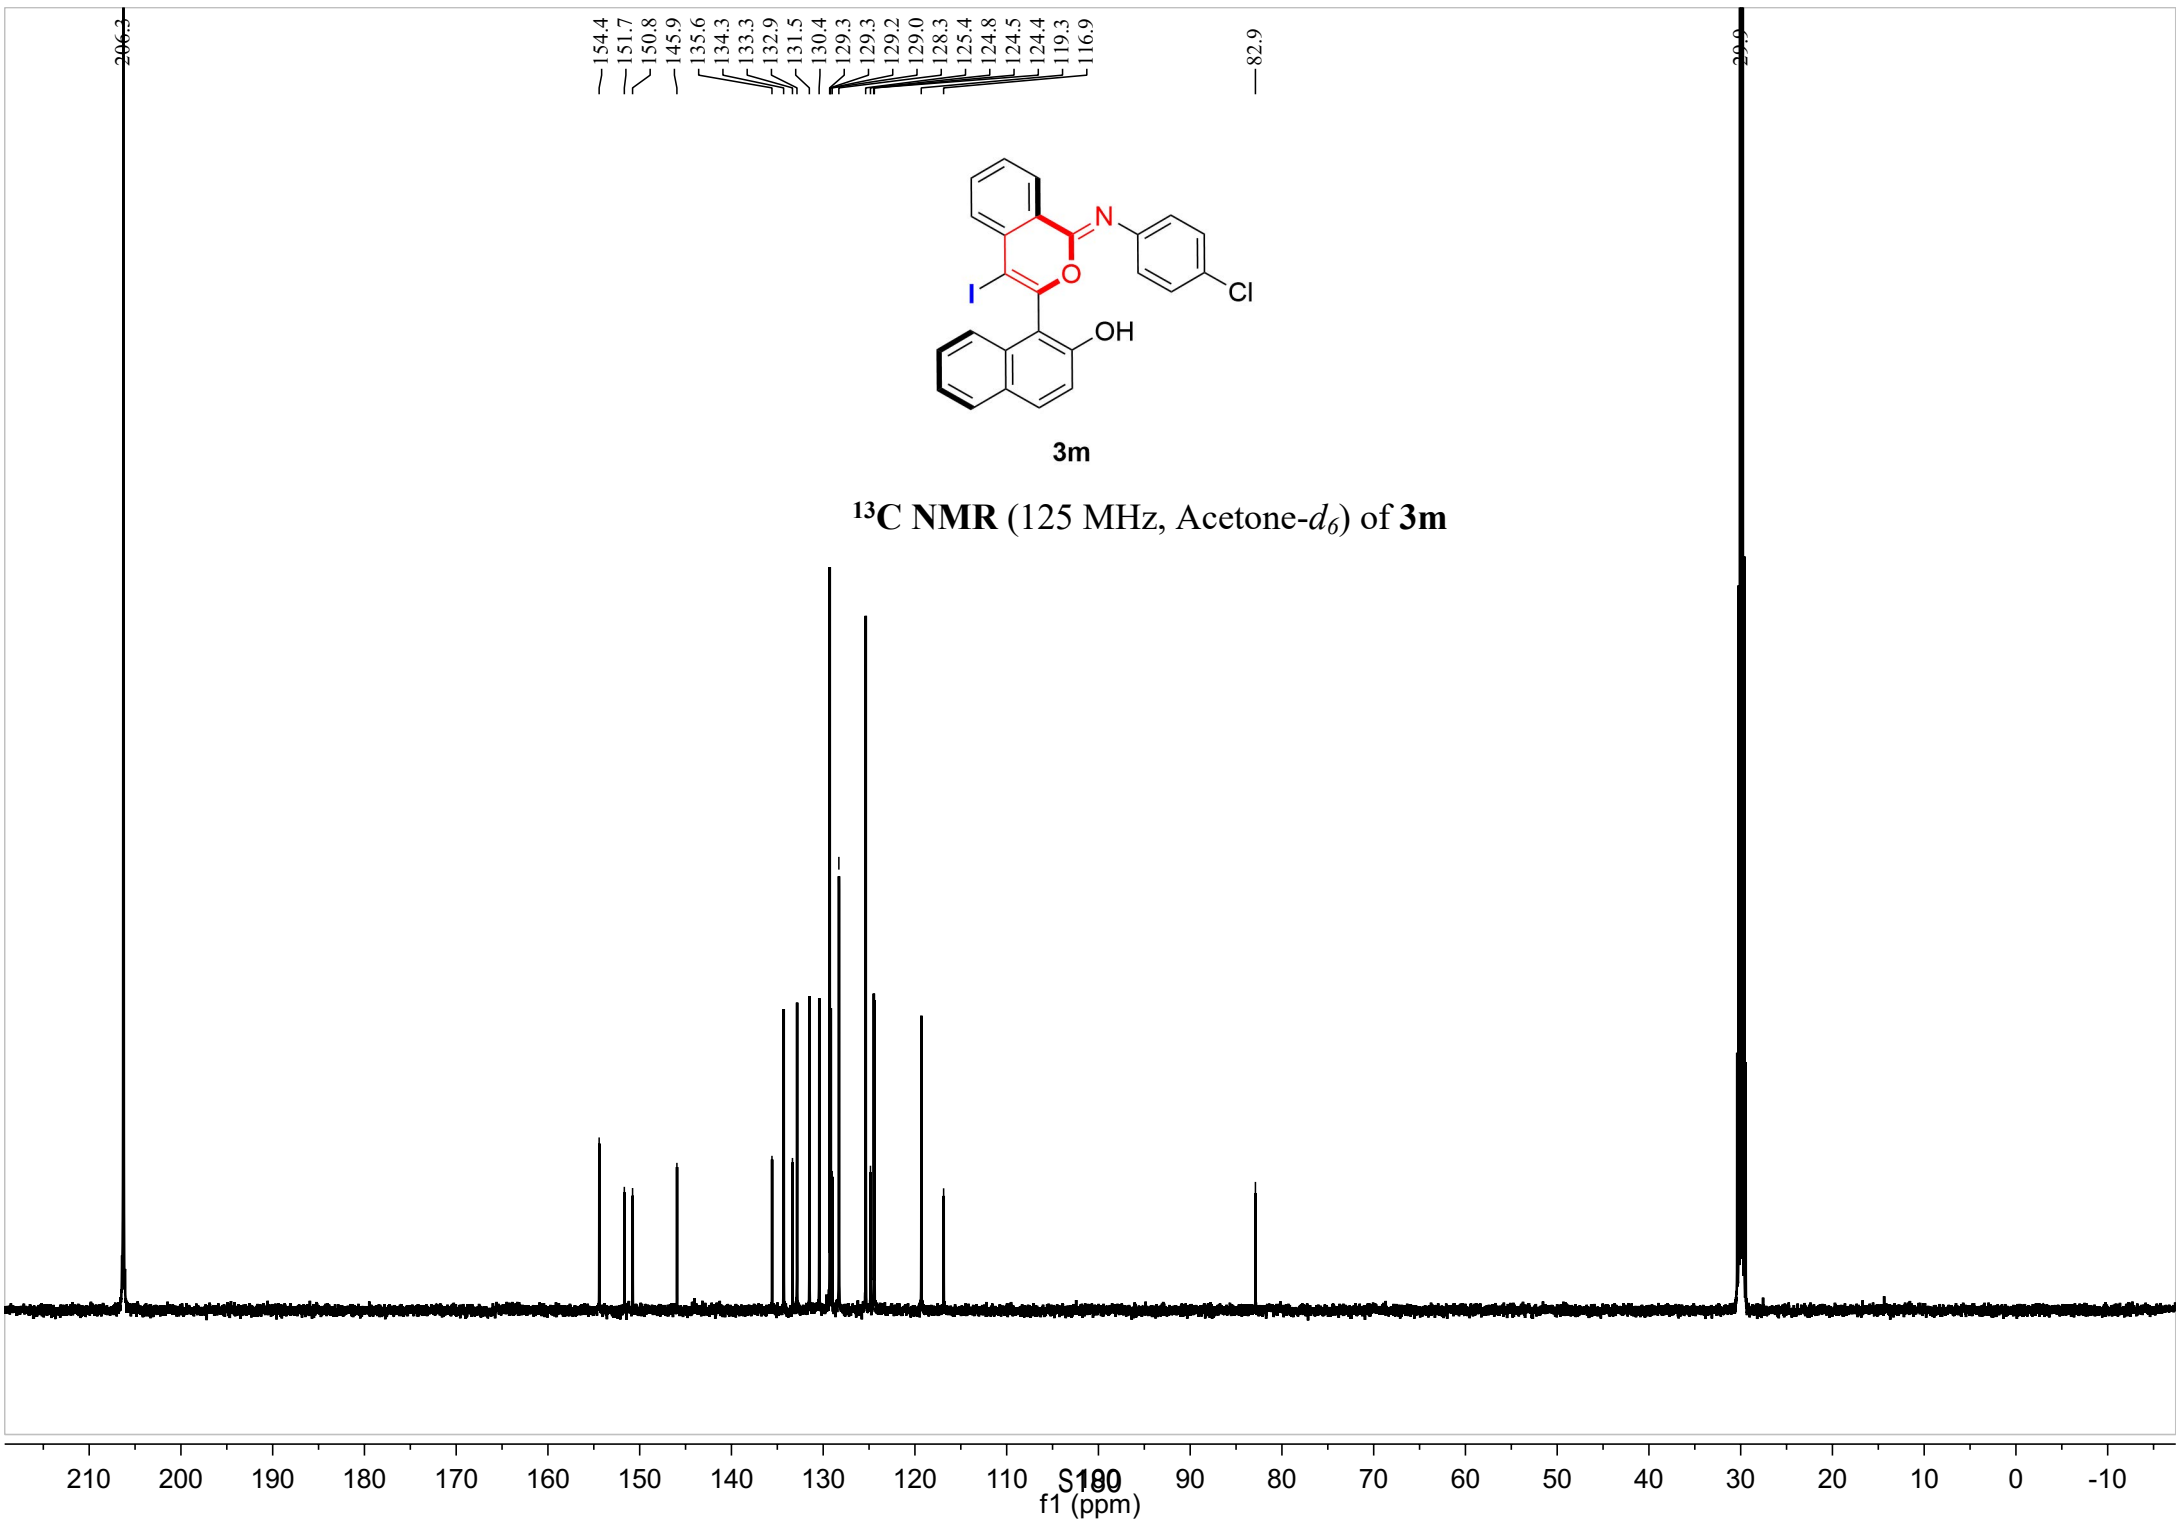

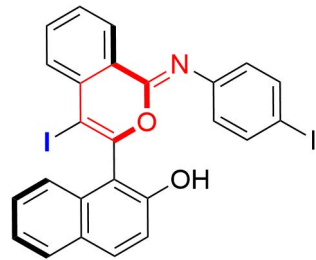

**3n**

**<sup>1</sup>H NMR (400 MHz, DMSO-*d*<sub>6</sub>) of **3n****

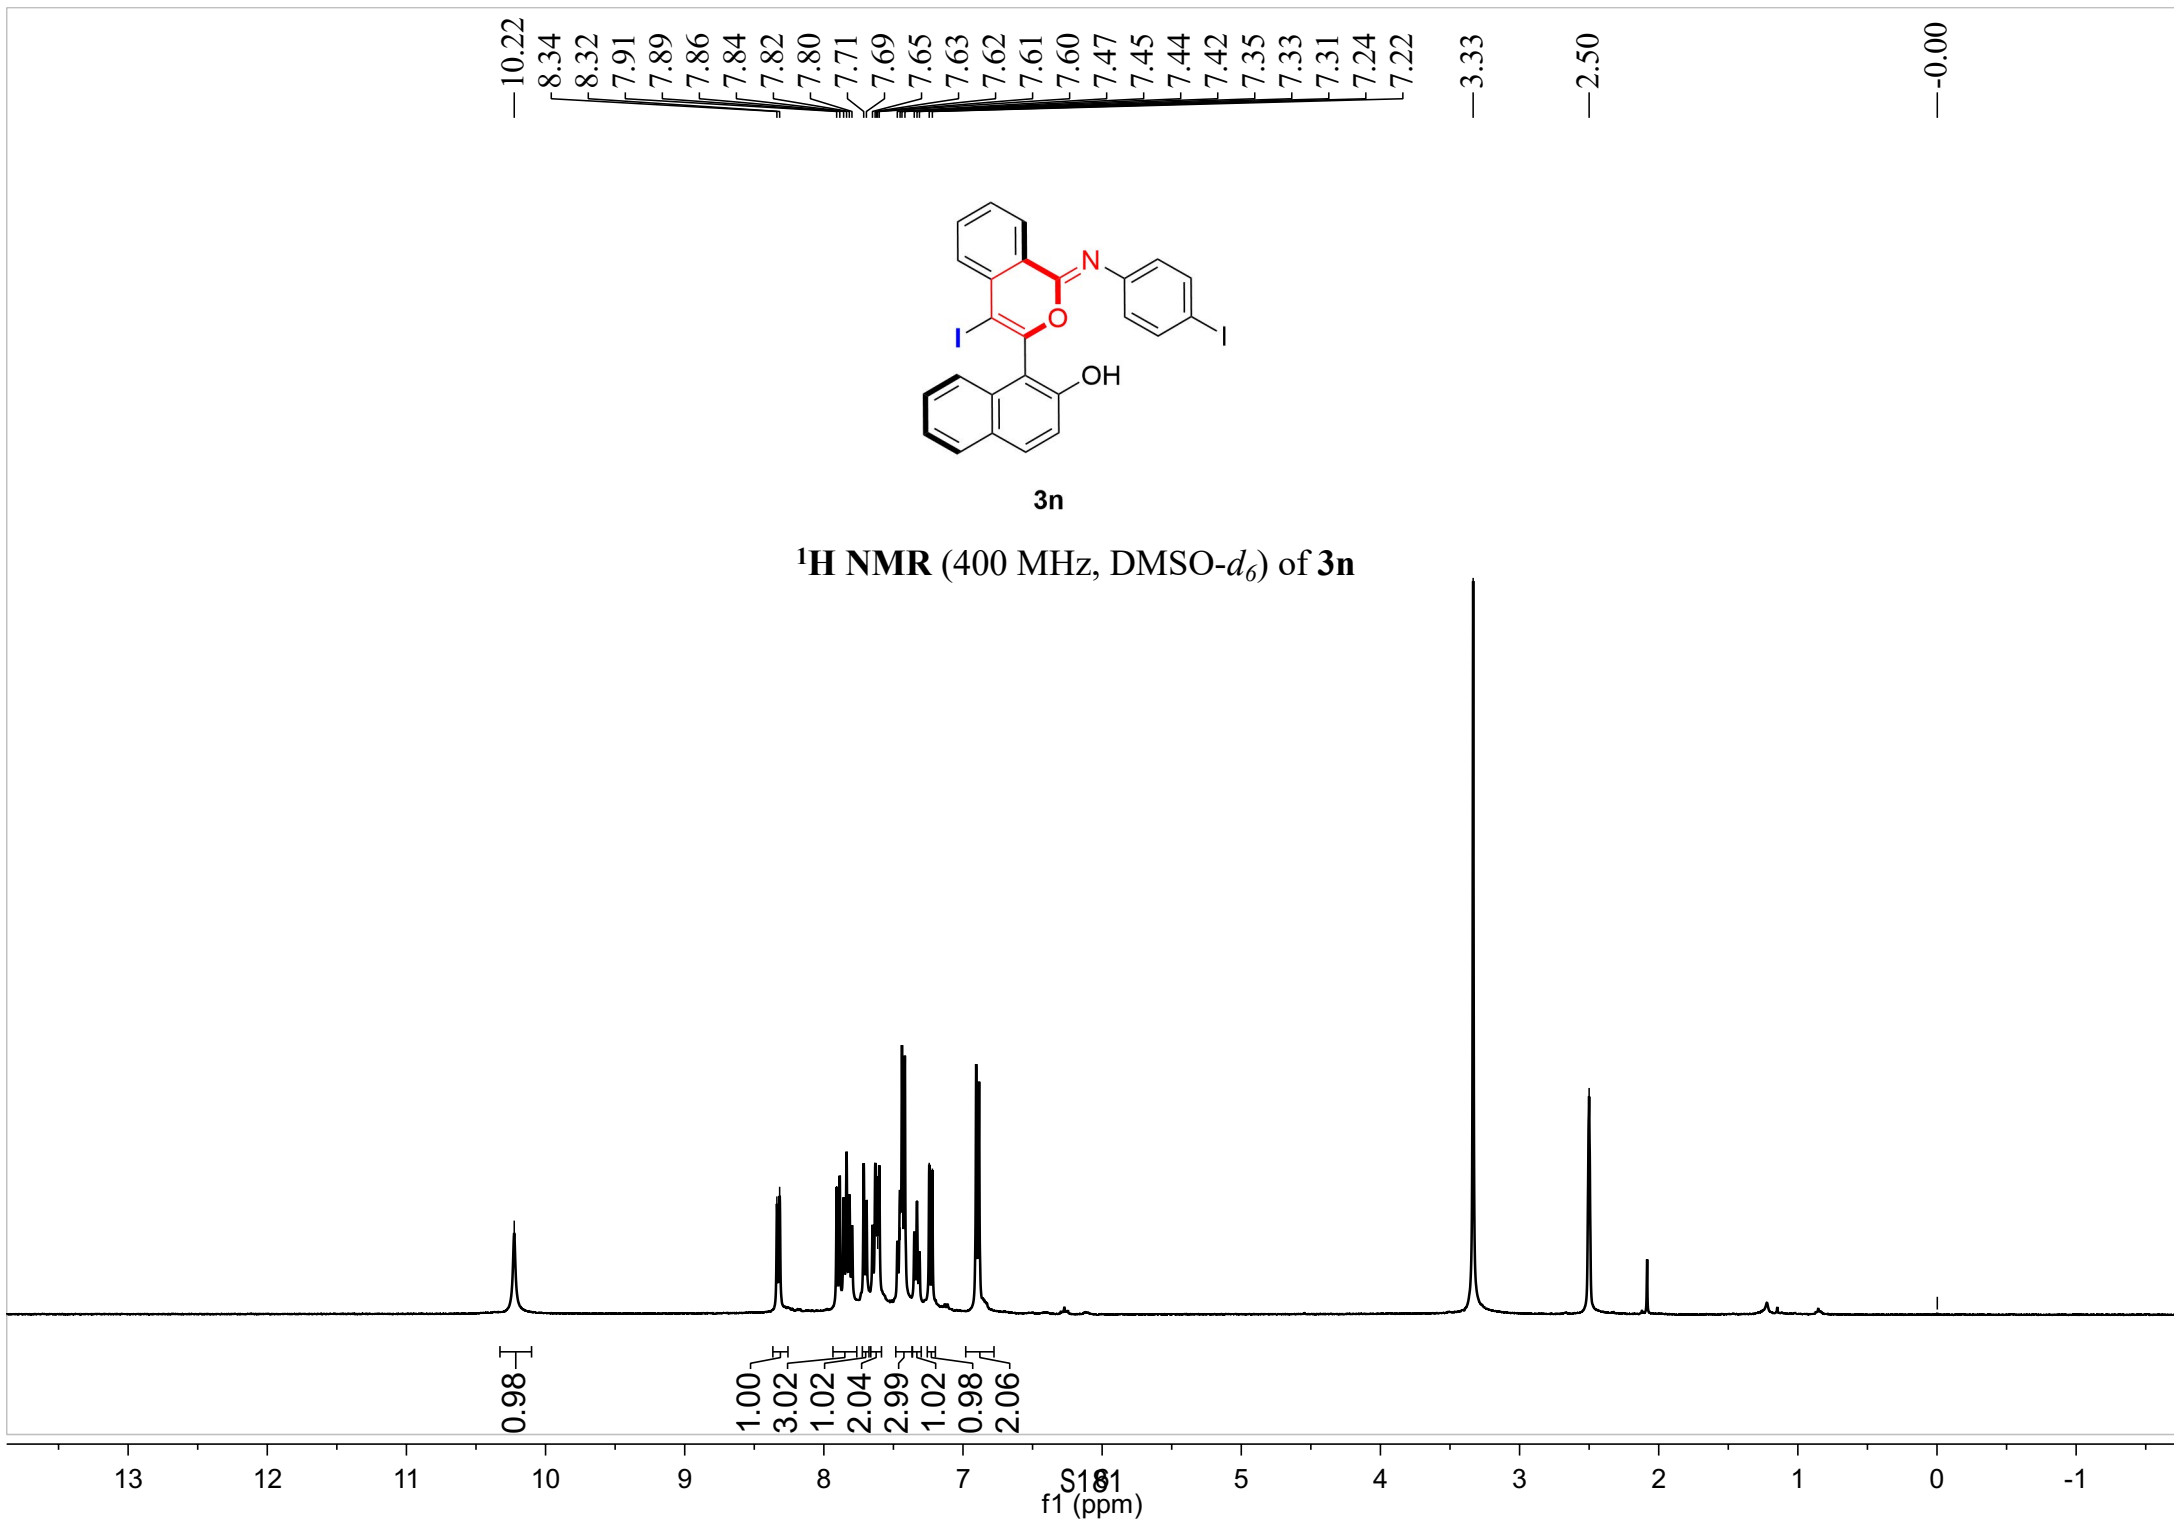

153.7  
150.5  
149.8  
145.6  
137.2  
134.4  
133.8  
132.0  
131.6  
130.3  
129.6  
128.2  
127.4  
127.3  
127.1  
125.0  
123.3  
123.2  
123.1  
118.4  
115.3

87.6  
82.5

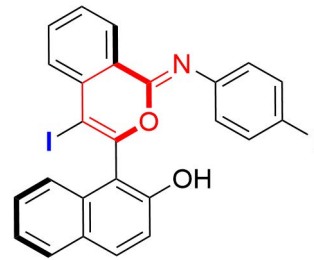

3n

<sup>13</sup>C NMR (125 MHz, DMSO-*d*<sub>6</sub>) of 3n

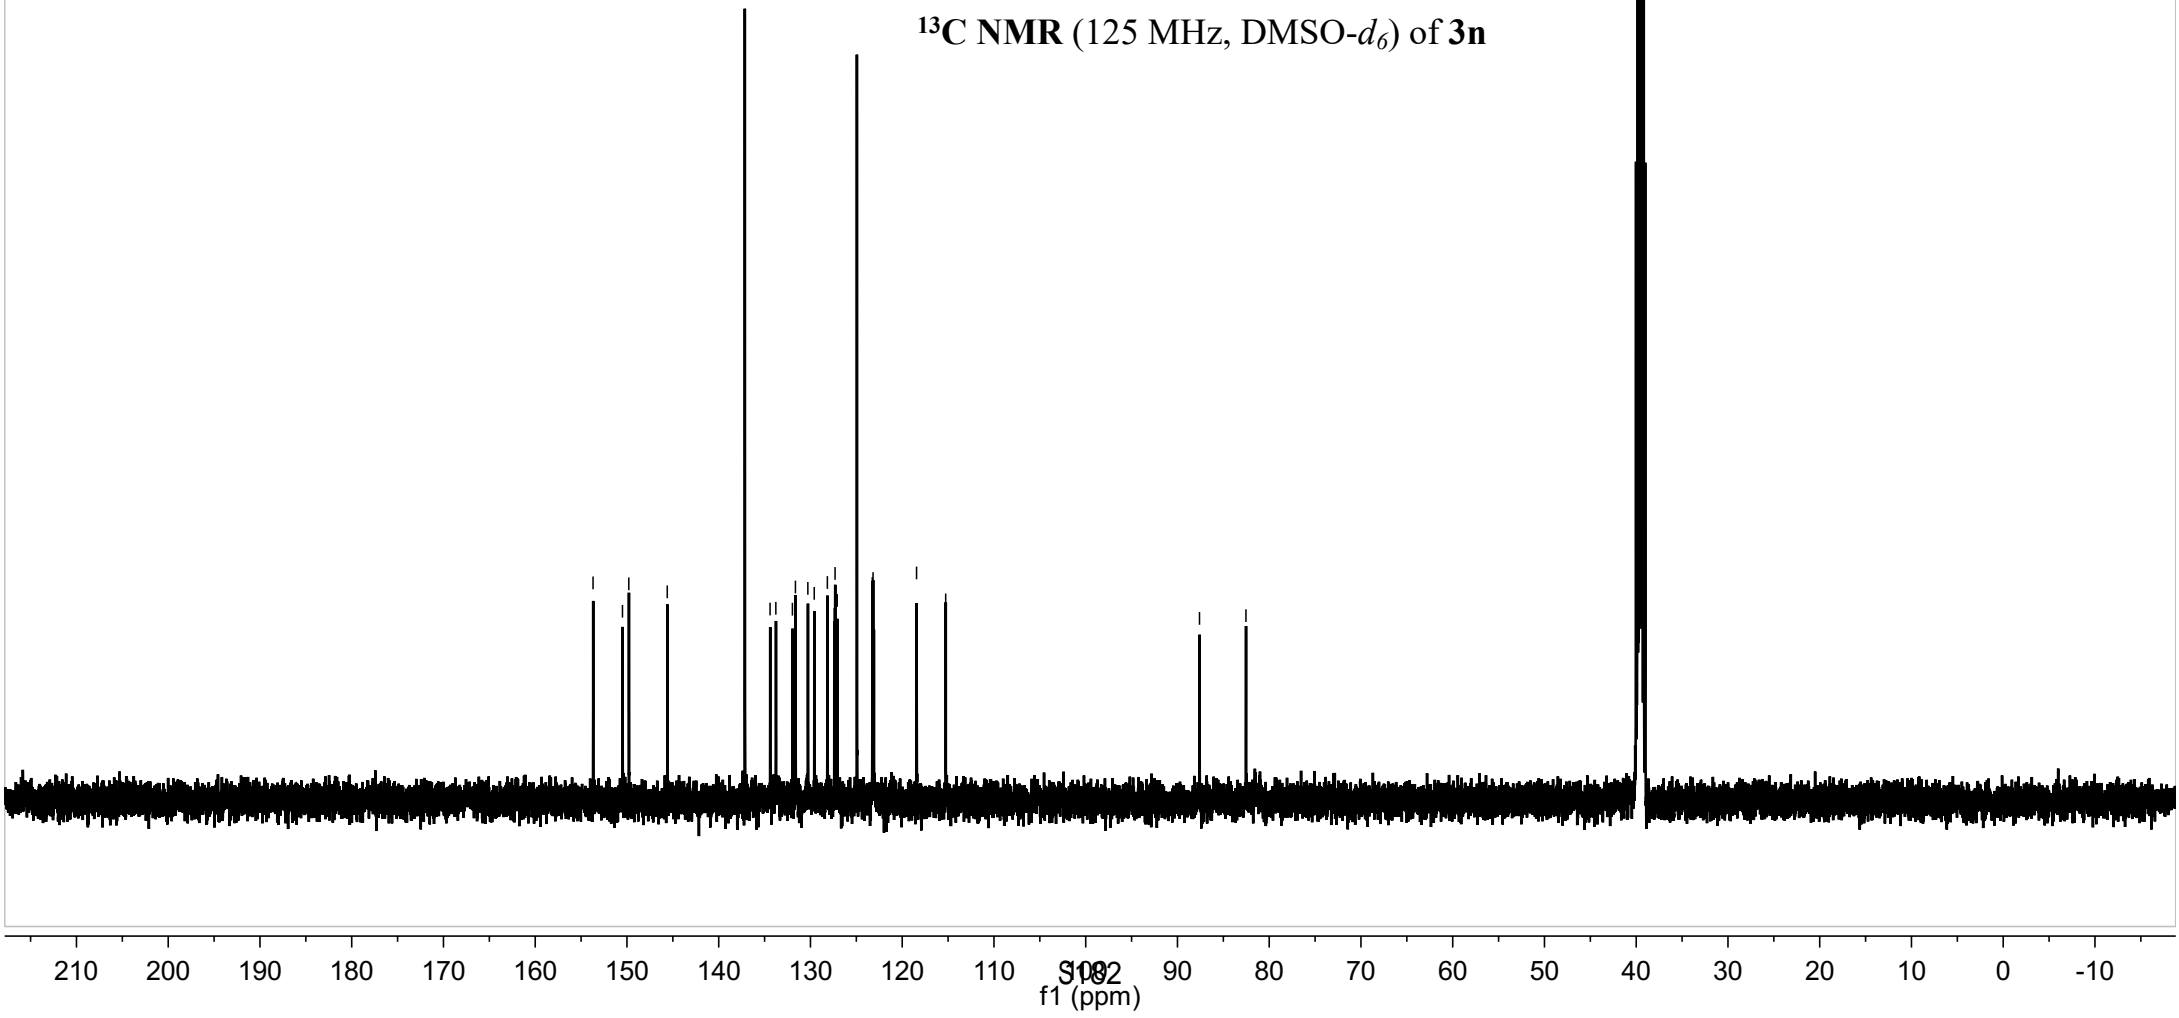

9.09 8.46 8.44 7.88 7.86 7.83 7.81 7.78 7.77 7.76 7.74 7.73 7.71 7.66 7.64 7.51 7.49 7.47 7.36 7.34 7.23 2.86 2.13 2.11 2.05 0.00

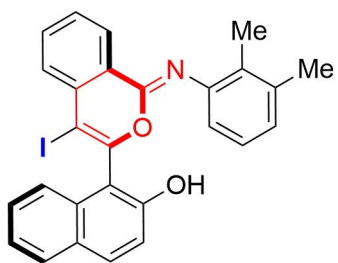

3o

<sup>1</sup>H NMR (400 MHz, Acetone-d<sub>6</sub>) of 3o

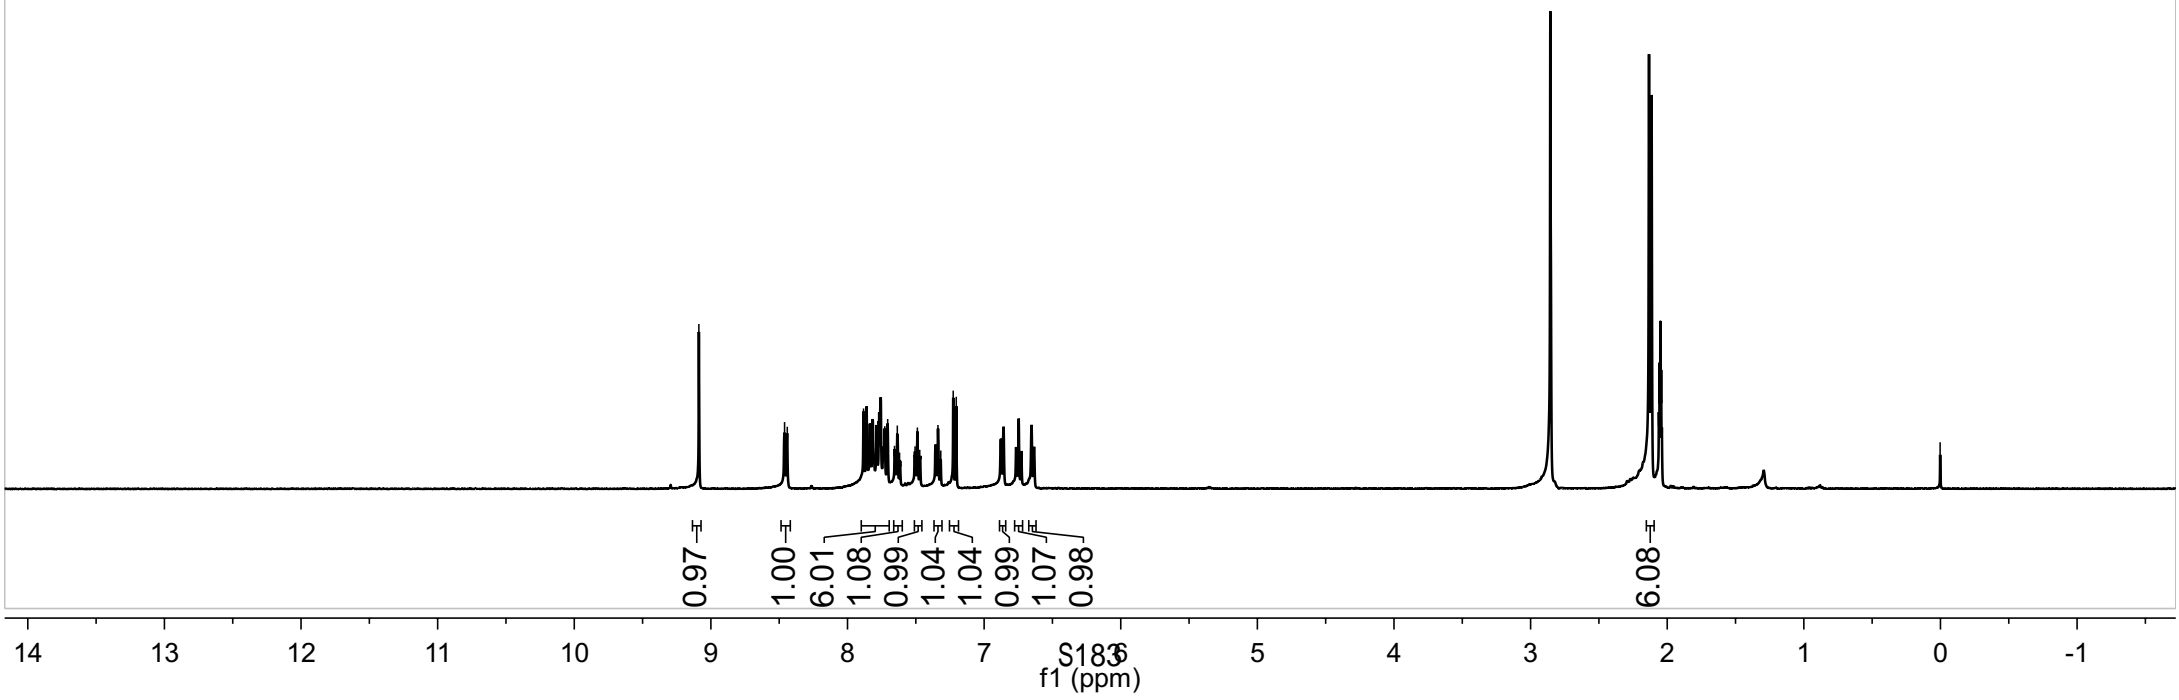

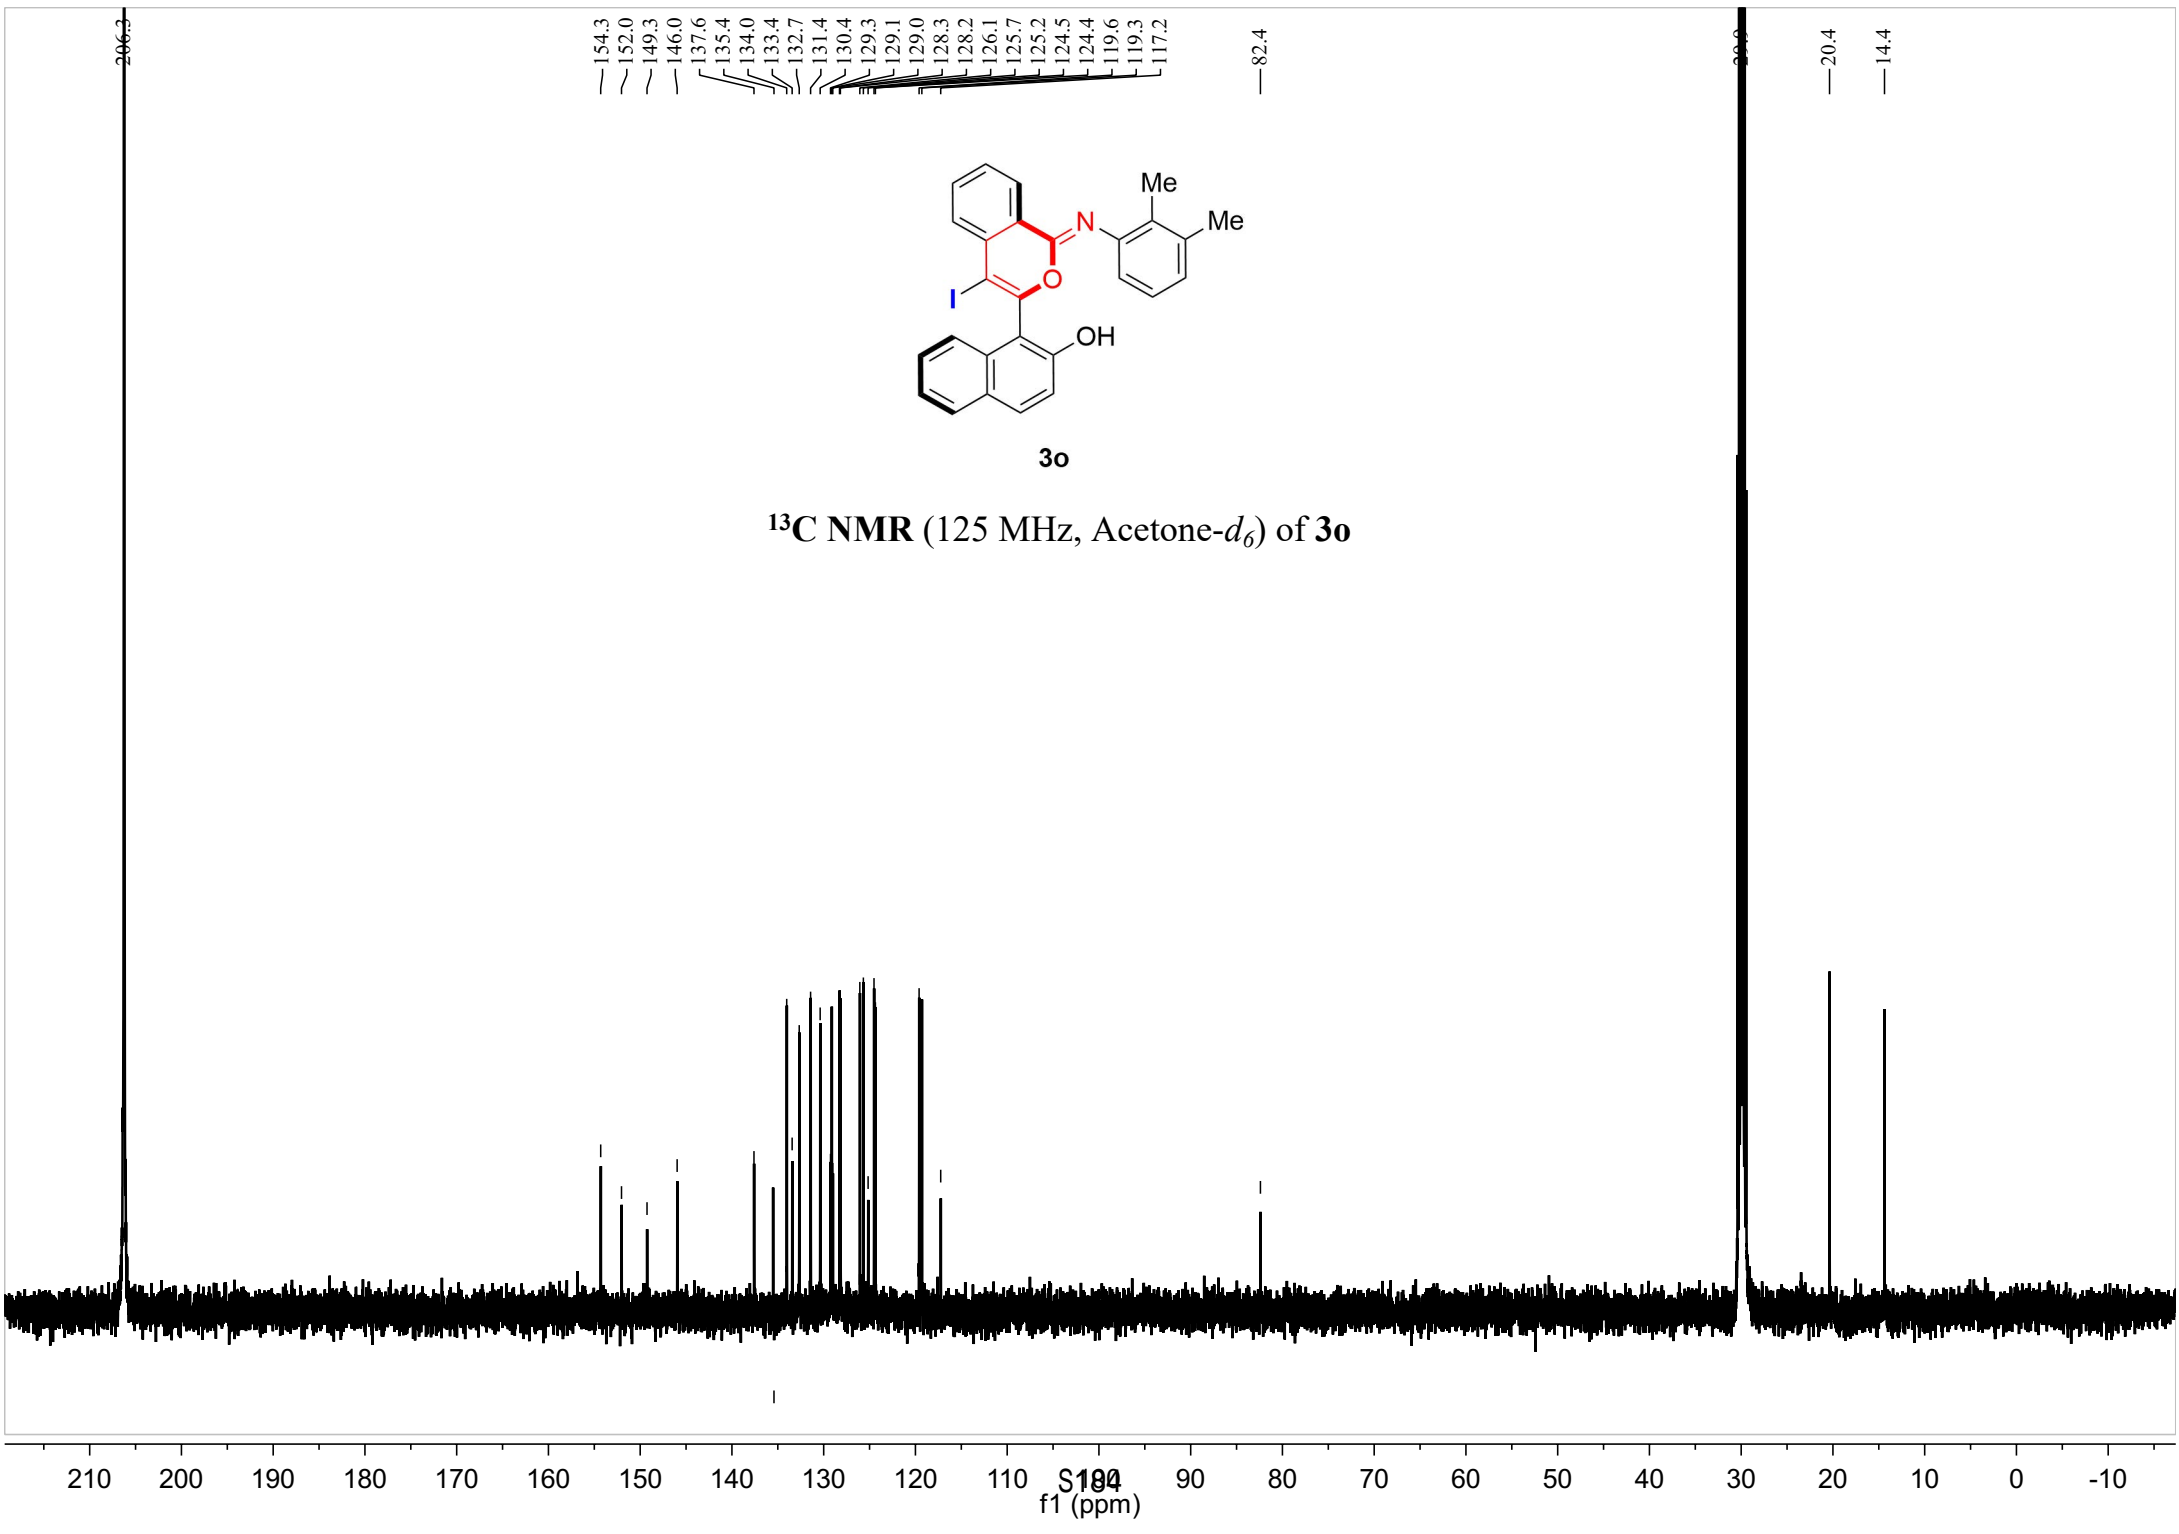



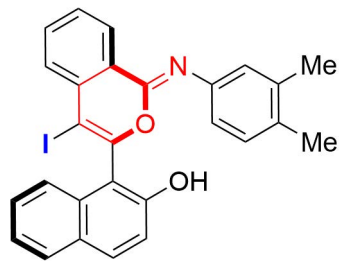

**3p**

**<sup>1</sup>H NMR (400 MHz, Acetone-*d*<sub>6</sub>) of 3p**

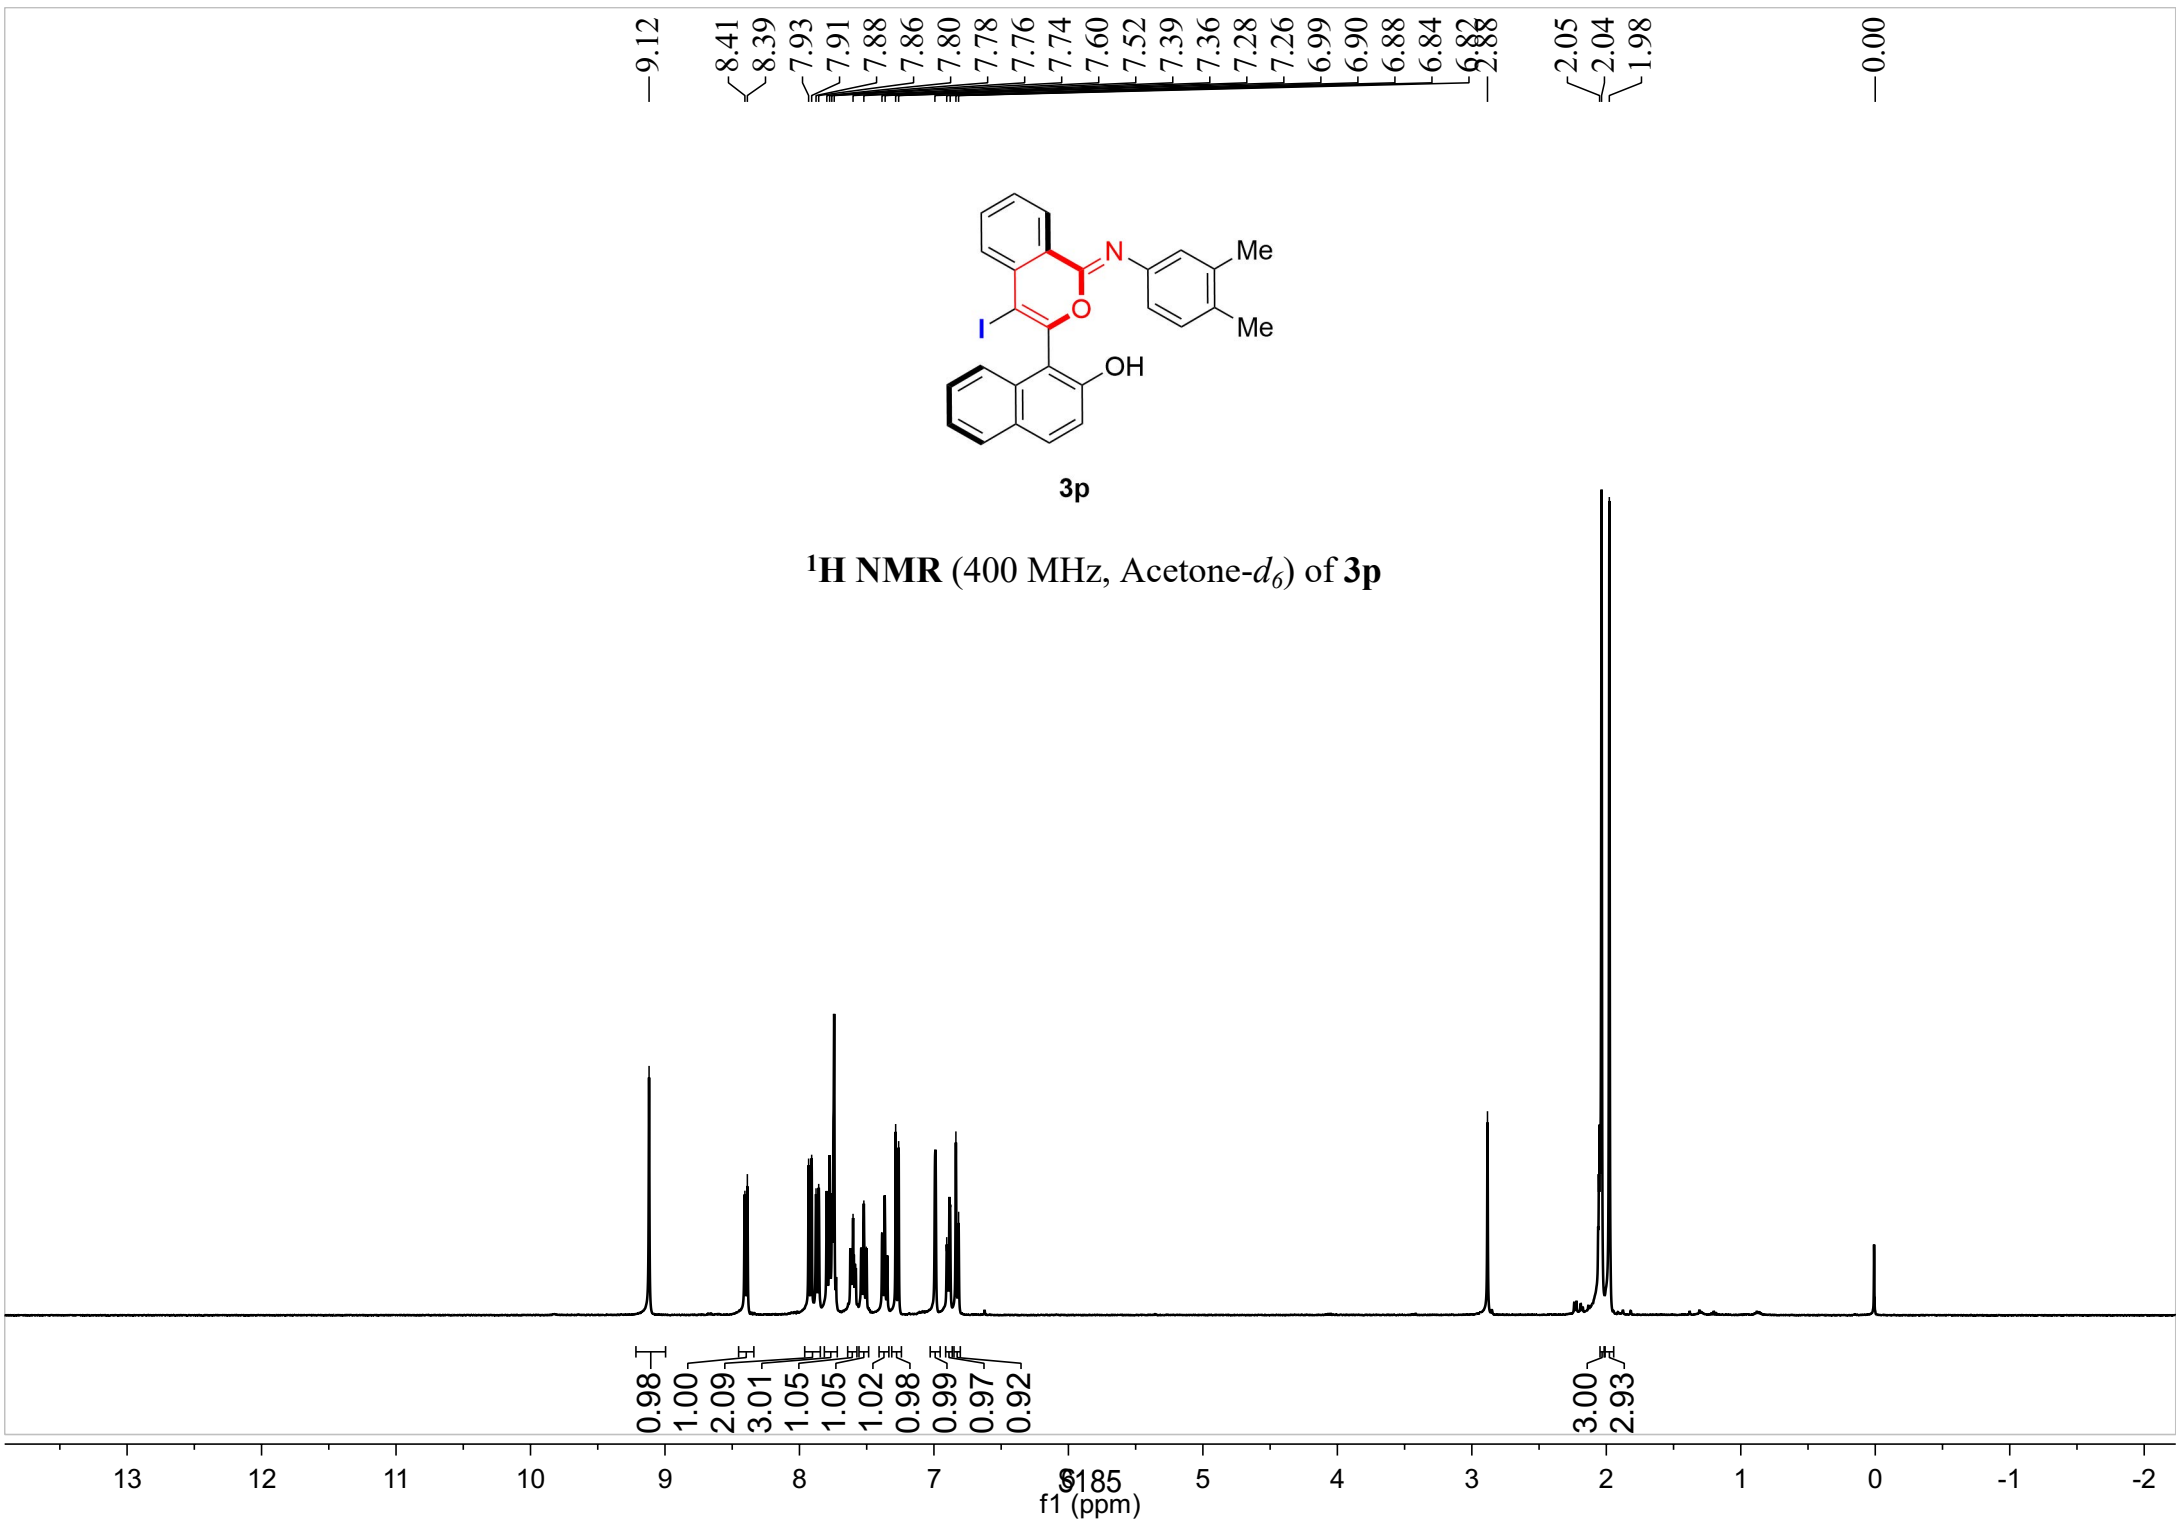

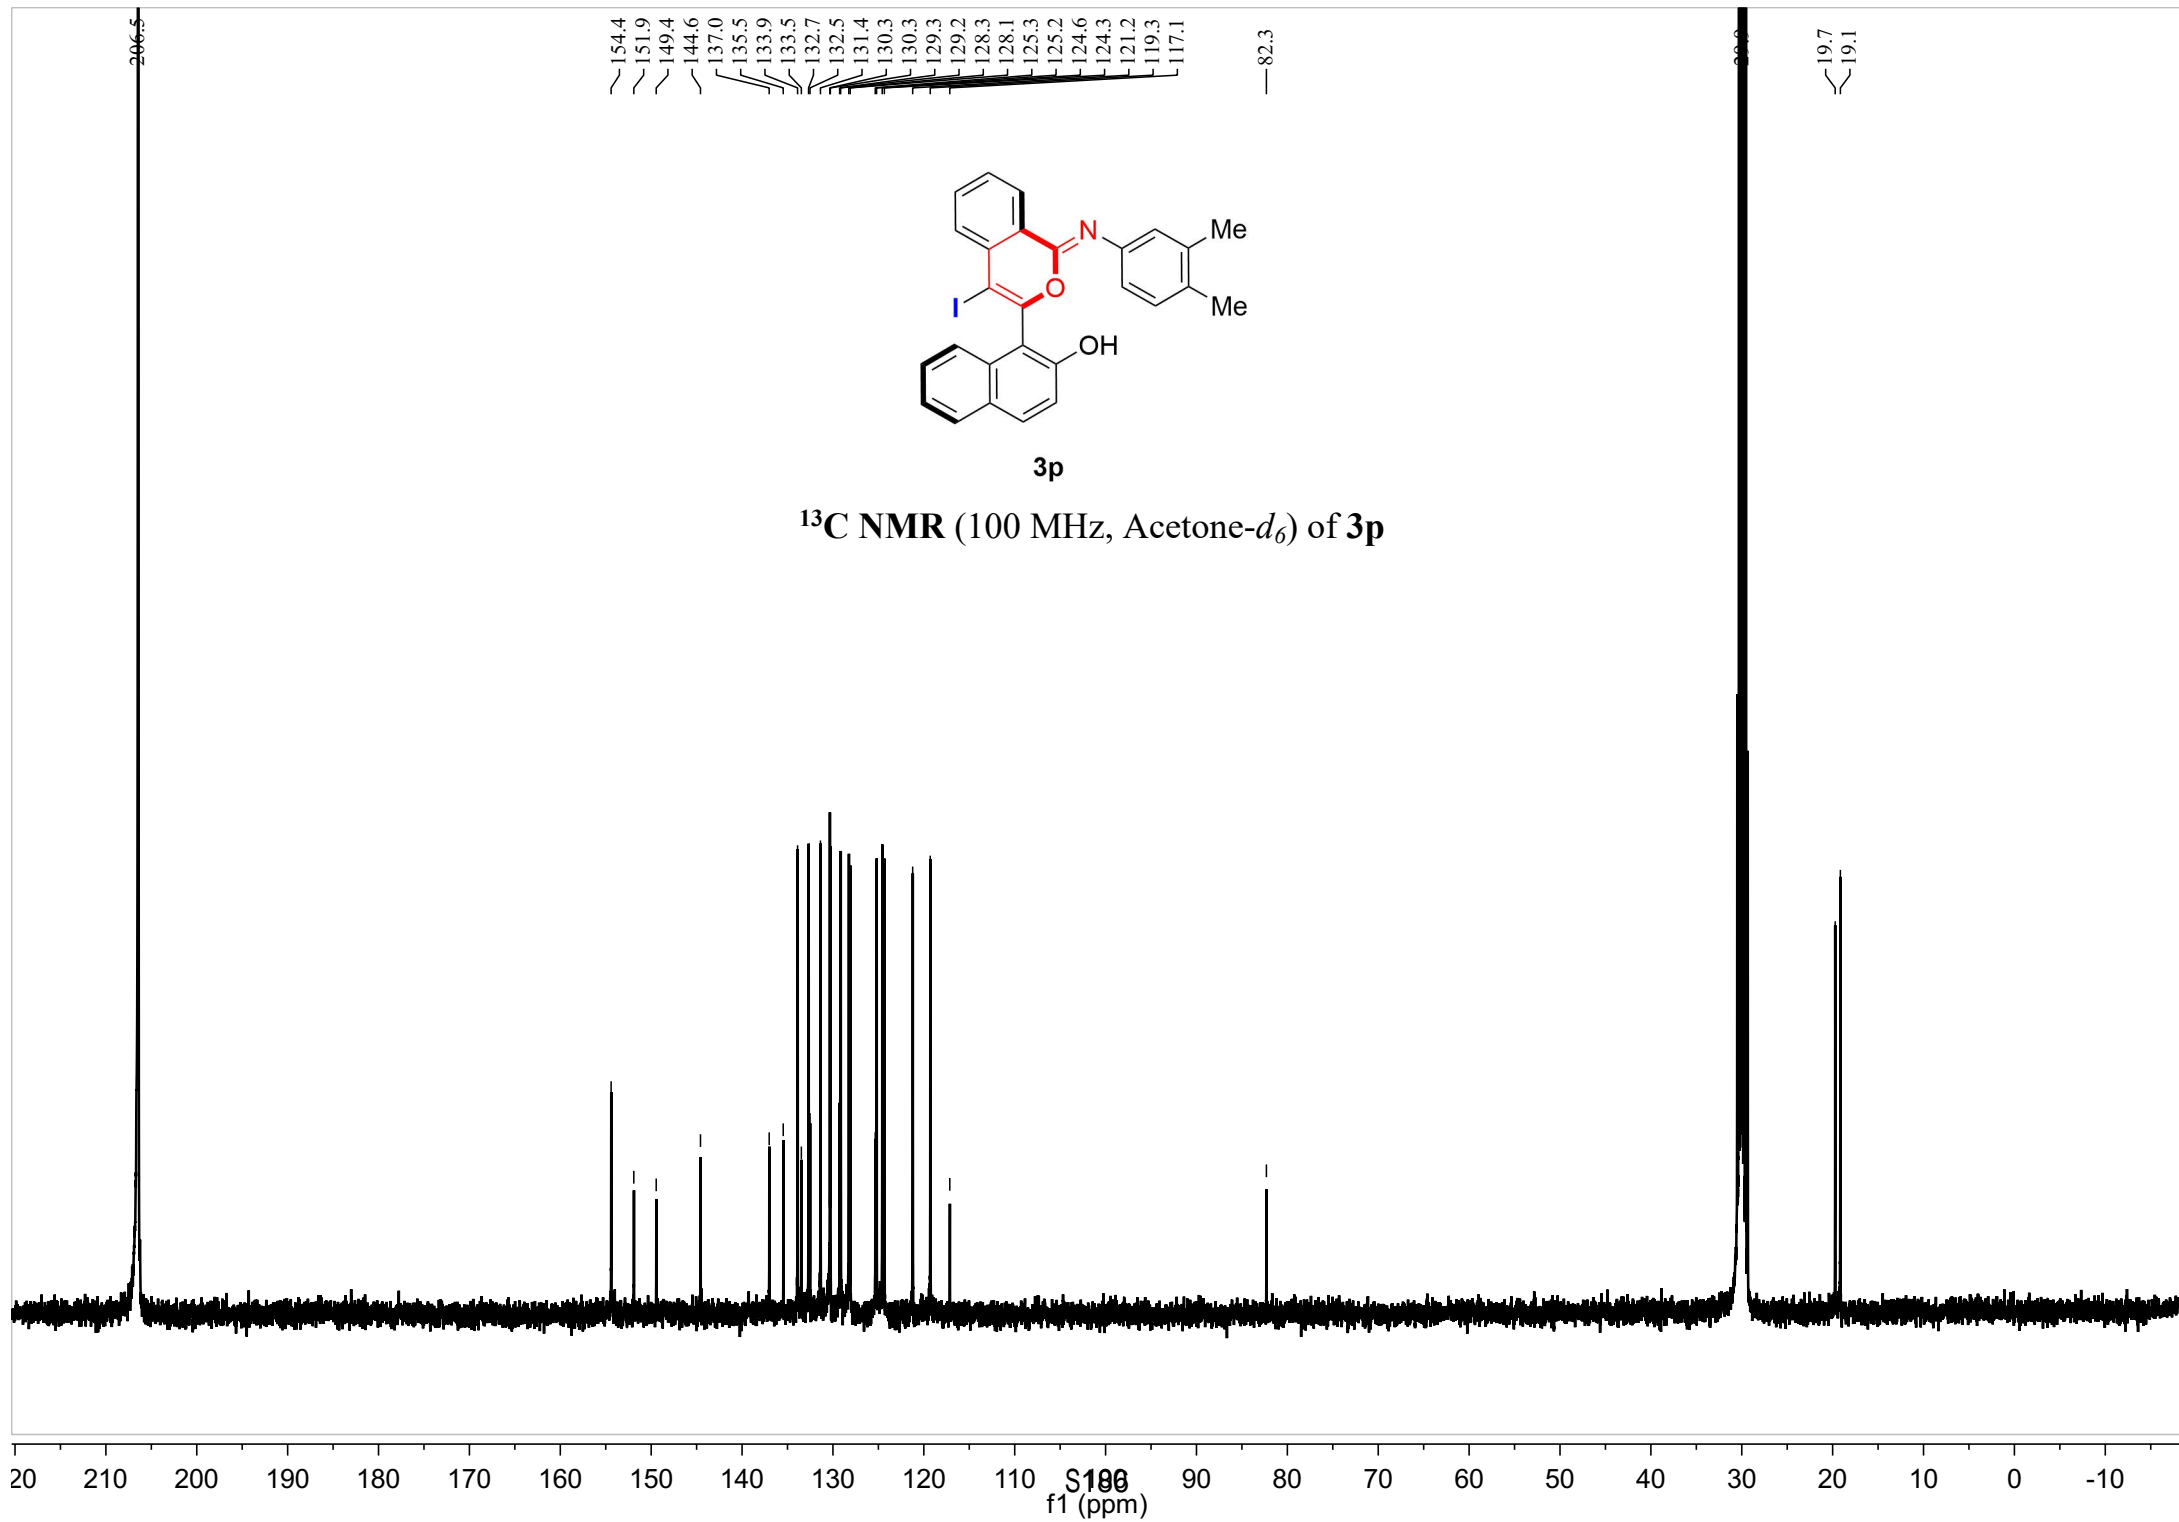

8.38  
8.36  
7.92  
7.91  
7.88  
7.86  
7.74  
7.73  
7.72  
7.62  
7.61  
7.60  
7.59  
7.58  
7.49  
7.47  
7.46  
7.39  
7.37  
7.36  
7.21  
7.19  
6.82  
6.72  
6.71  
6.68  
6.67  
— 3.66  
— 3.26  
— 2.17  
— 1.94

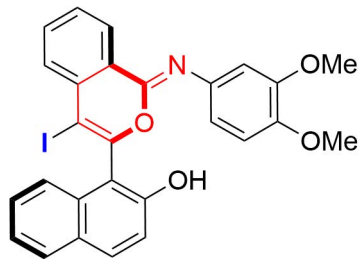

3q

<sup>1</sup>H NMR (500 MHz, CD<sub>3</sub>CN) of 3q

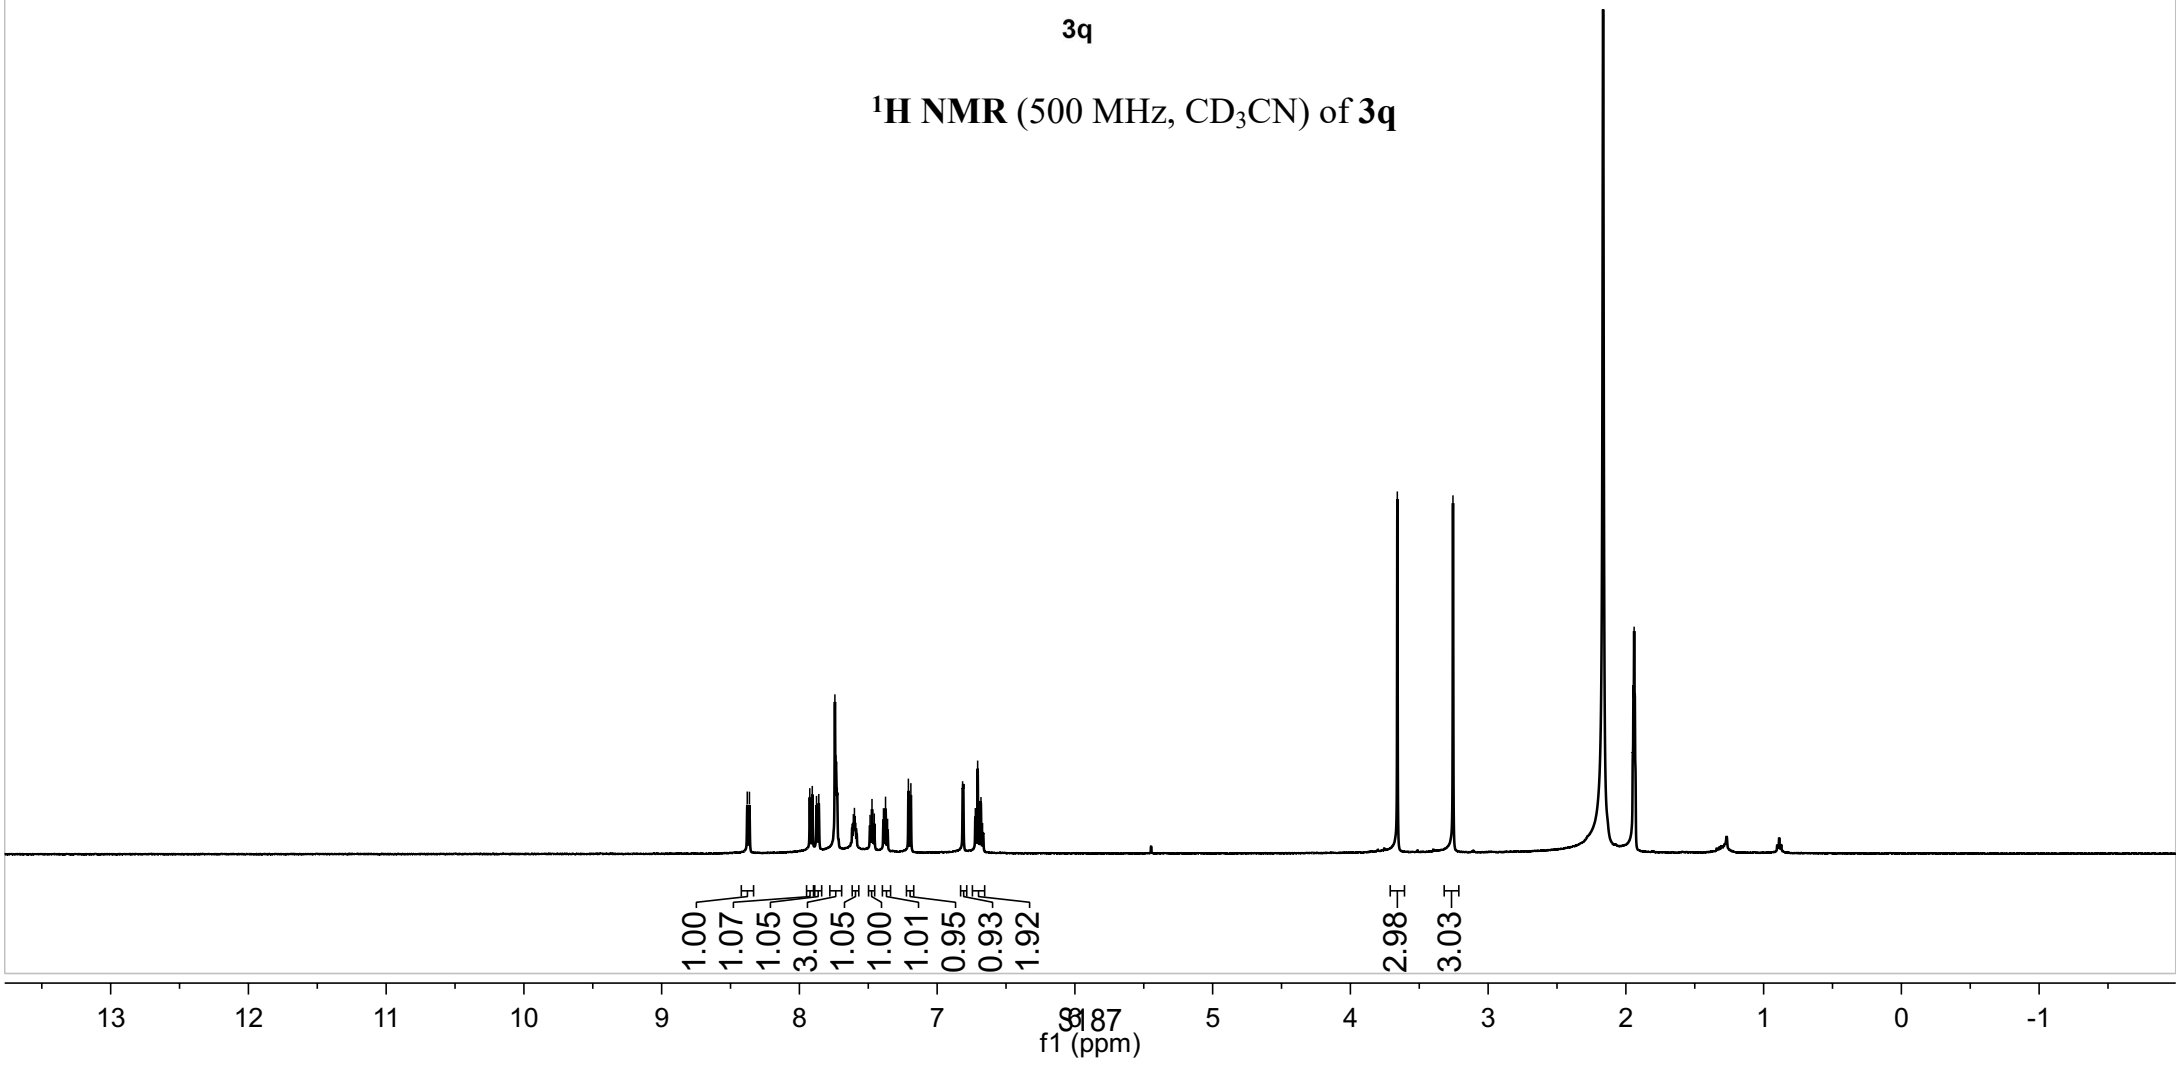

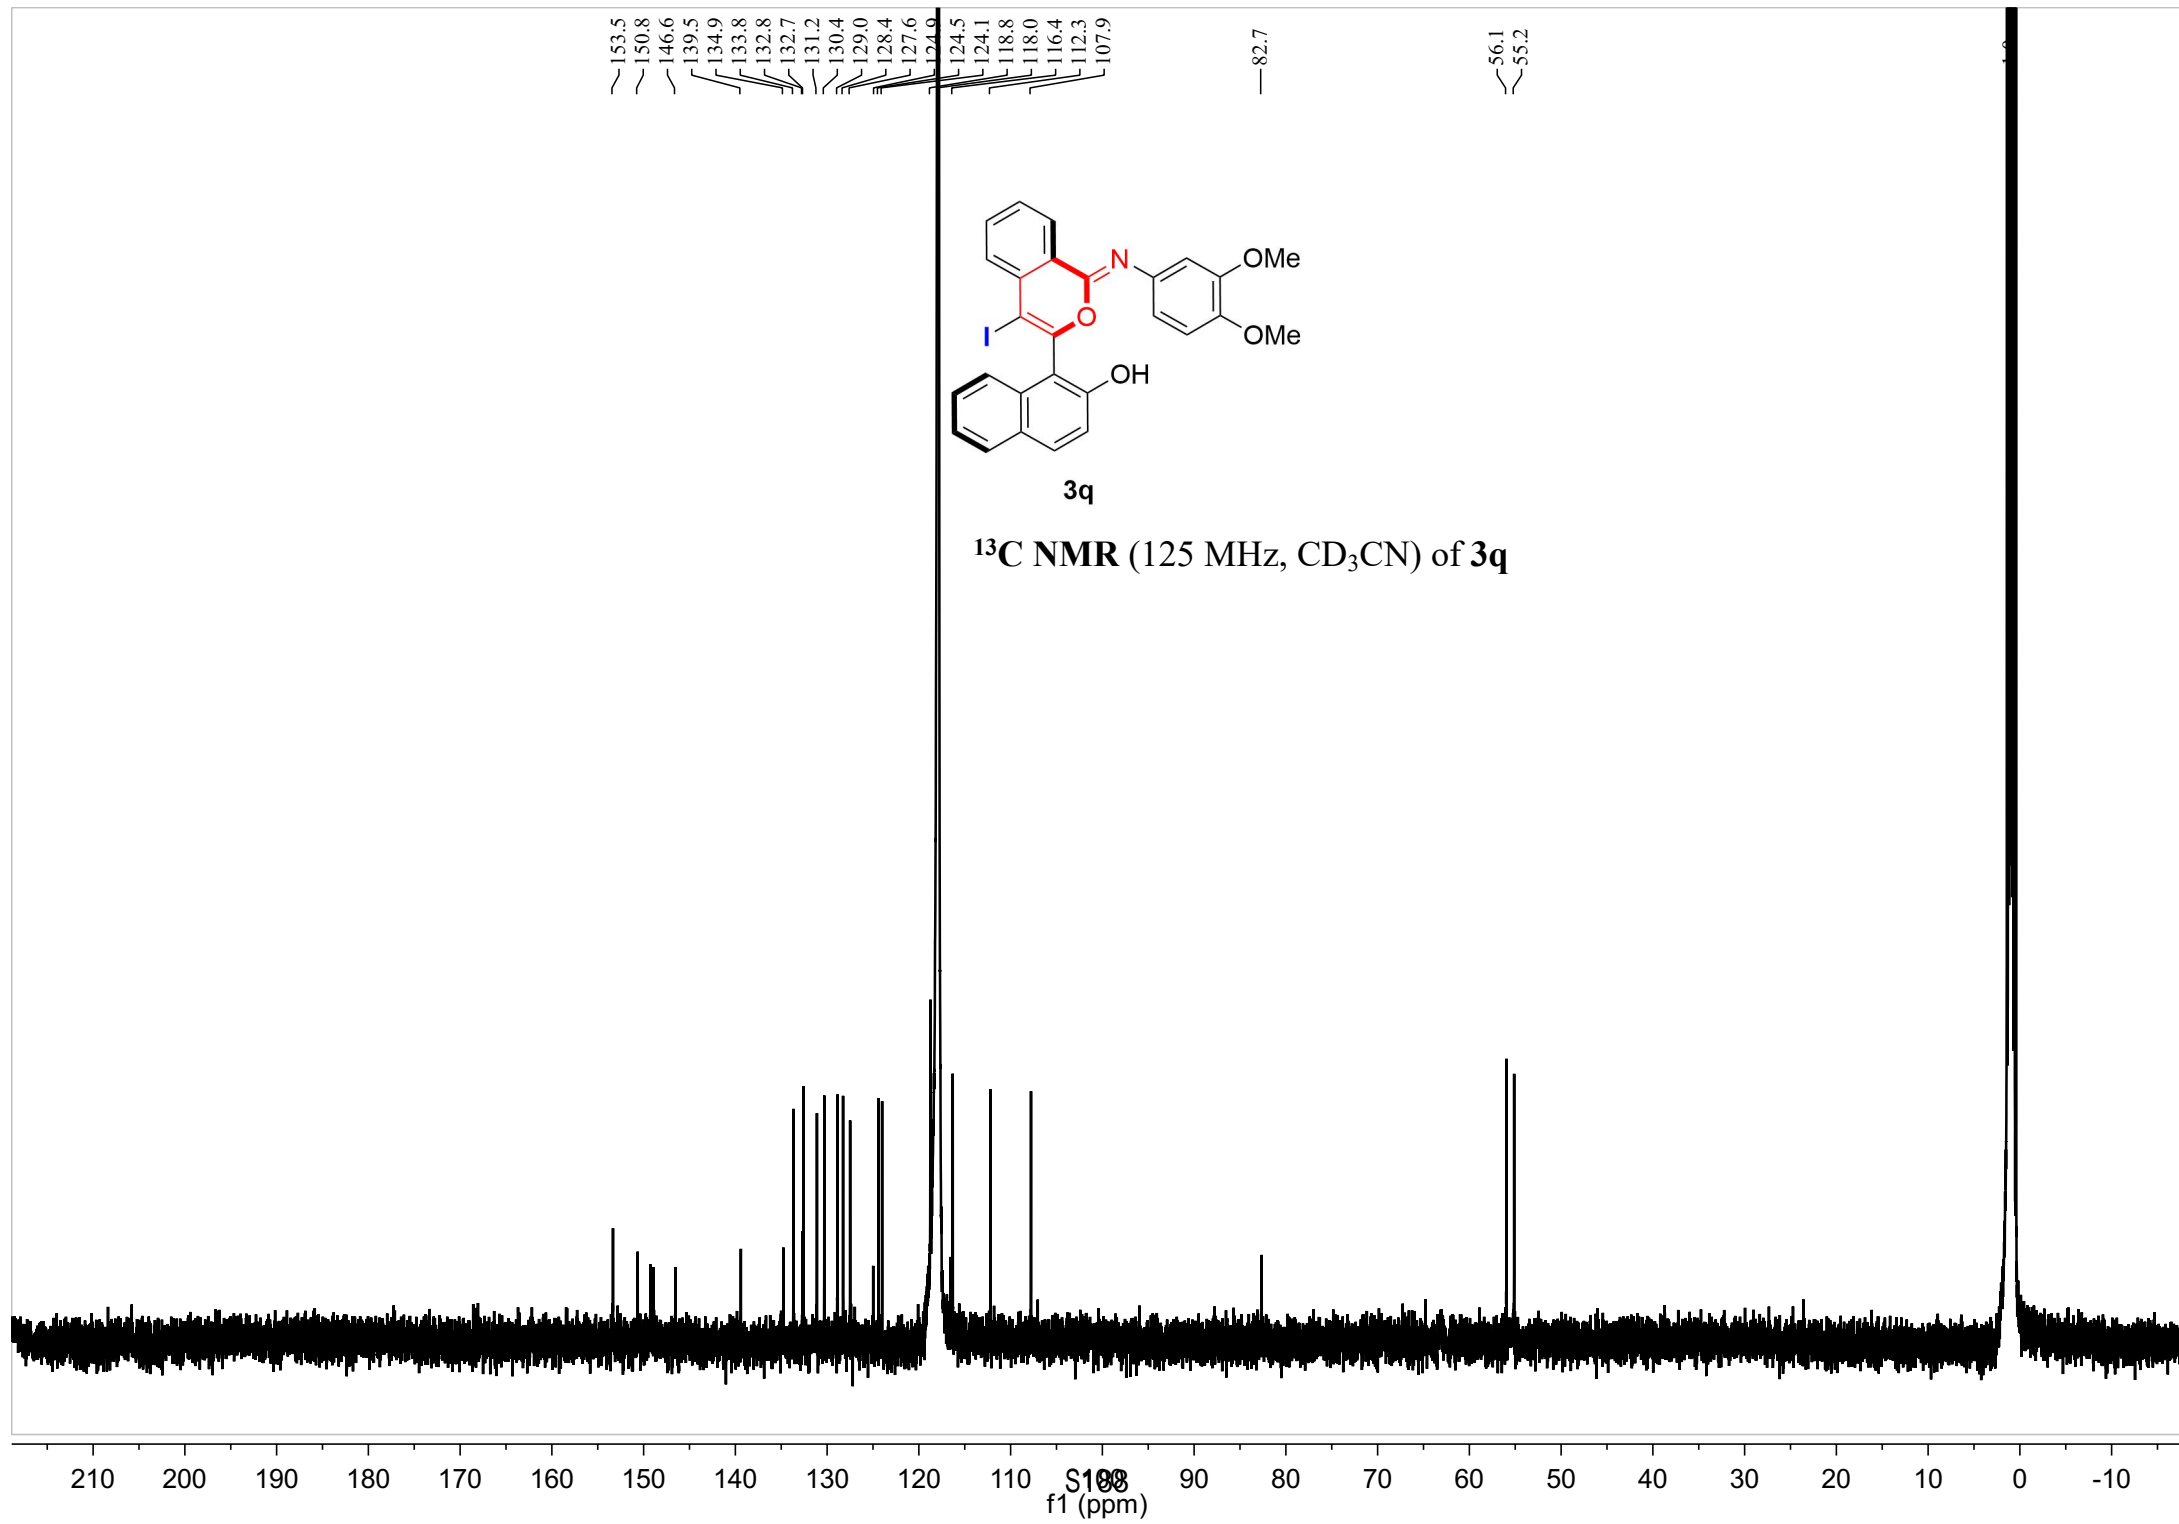

8.43  
8.42  
7.89  
7.87  
7.85  
7.83  
7.77  
7.76  
7.64  
7.62  
7.62  
7.61  
7.60  
7.47  
7.46  
7.44  
7.38  
7.37  
7.34  
7.17  
7.15  
7.08  
6.92  
6.92  
6.88  
6.86

2.15  
2.15  
1.94

-0.00

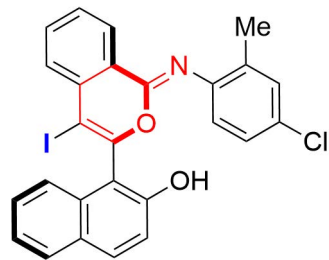

3r

<sup>1</sup>H NMR (400 MHz, CD<sub>3</sub>CN) of 3r

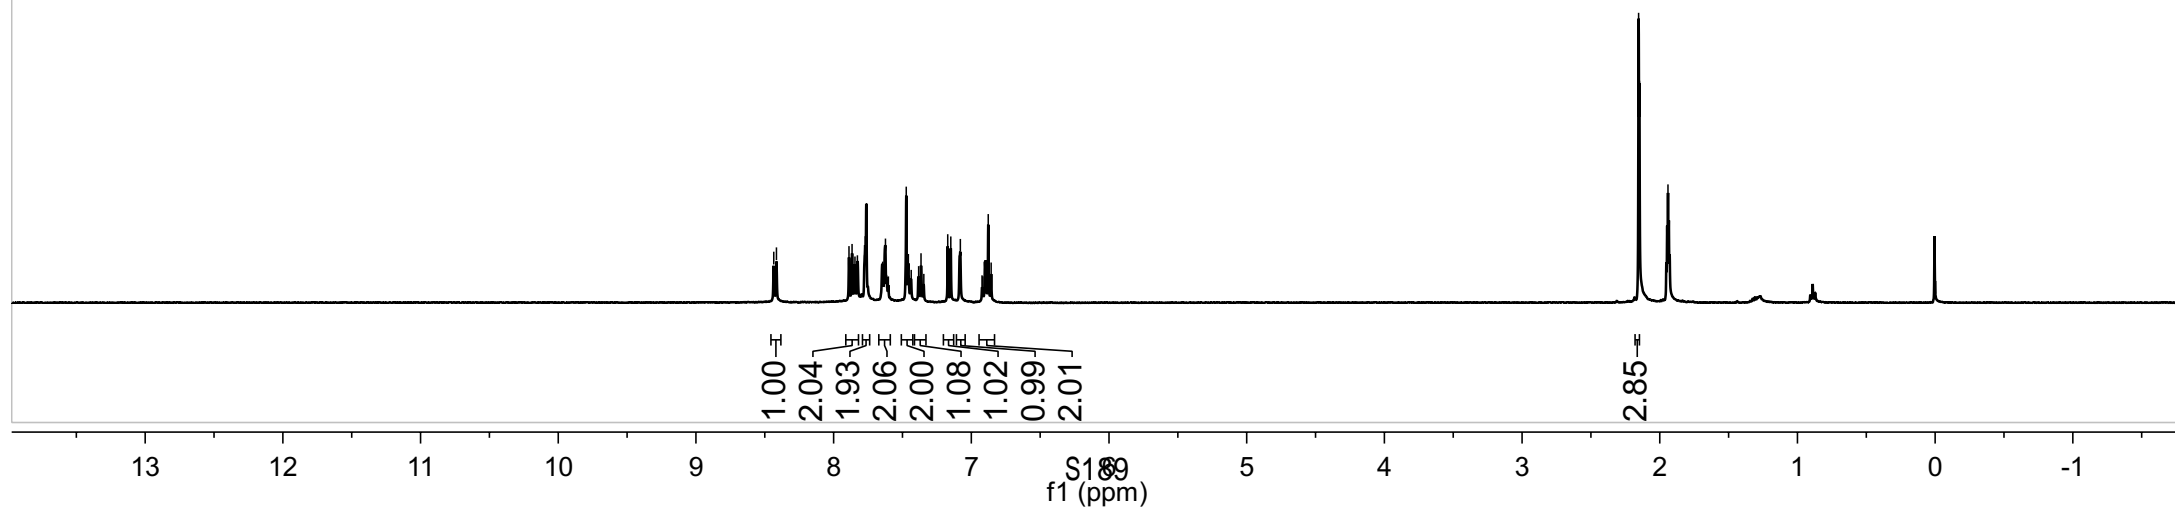

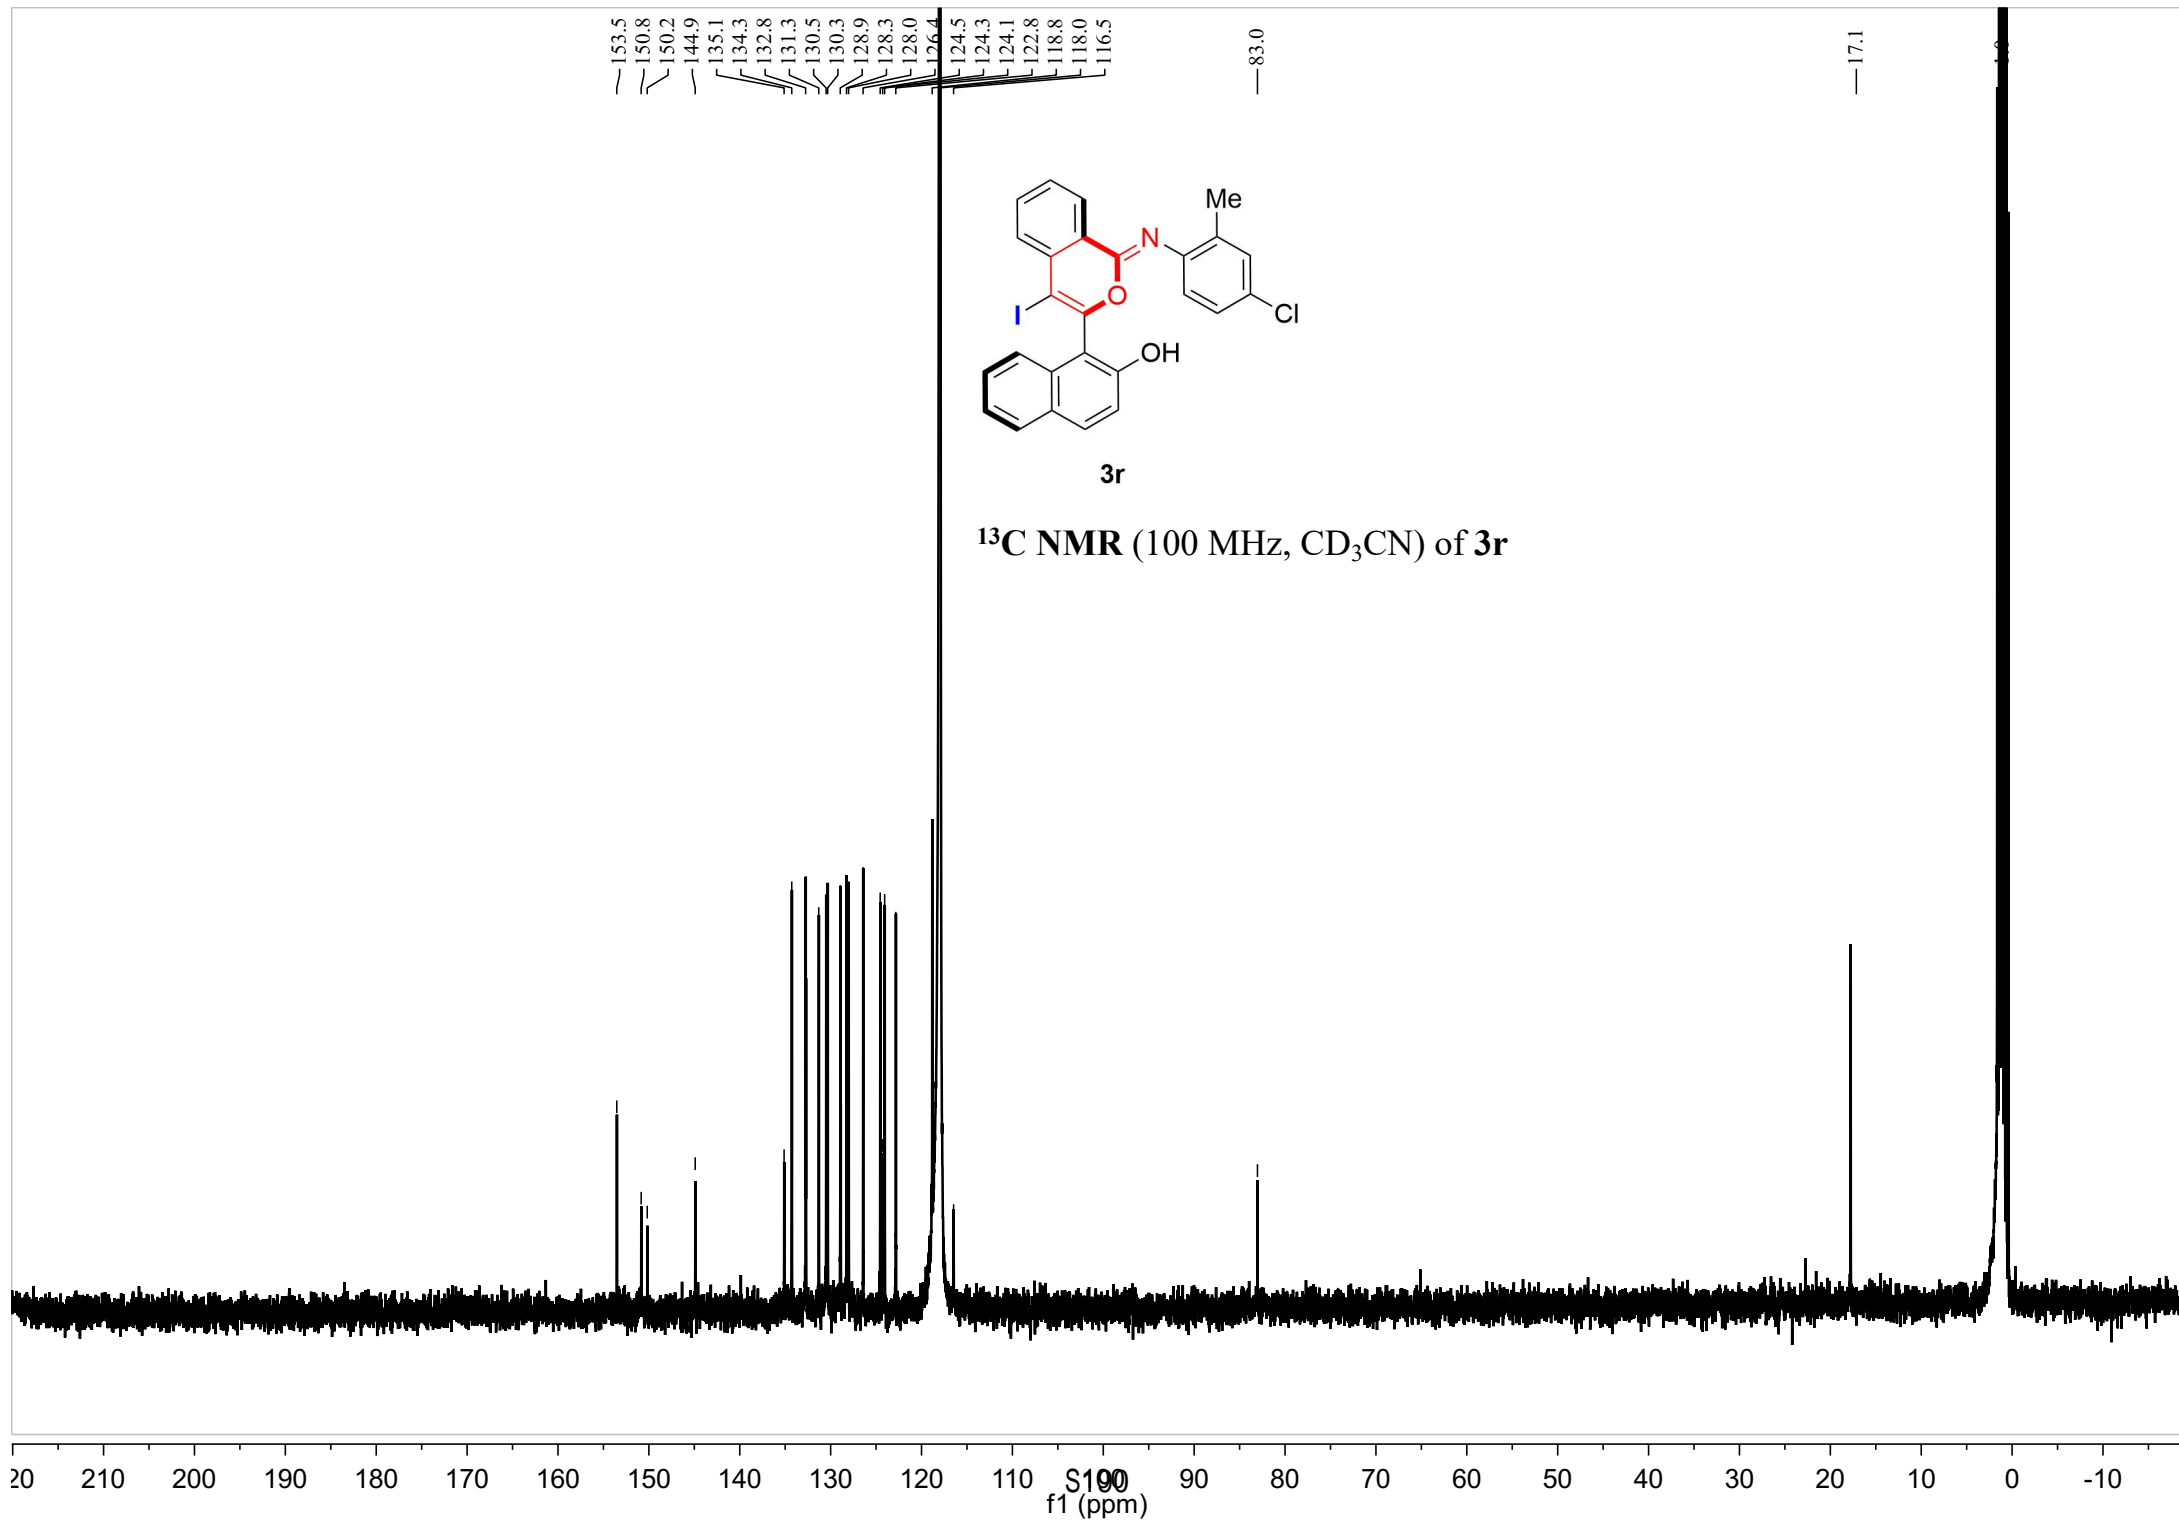

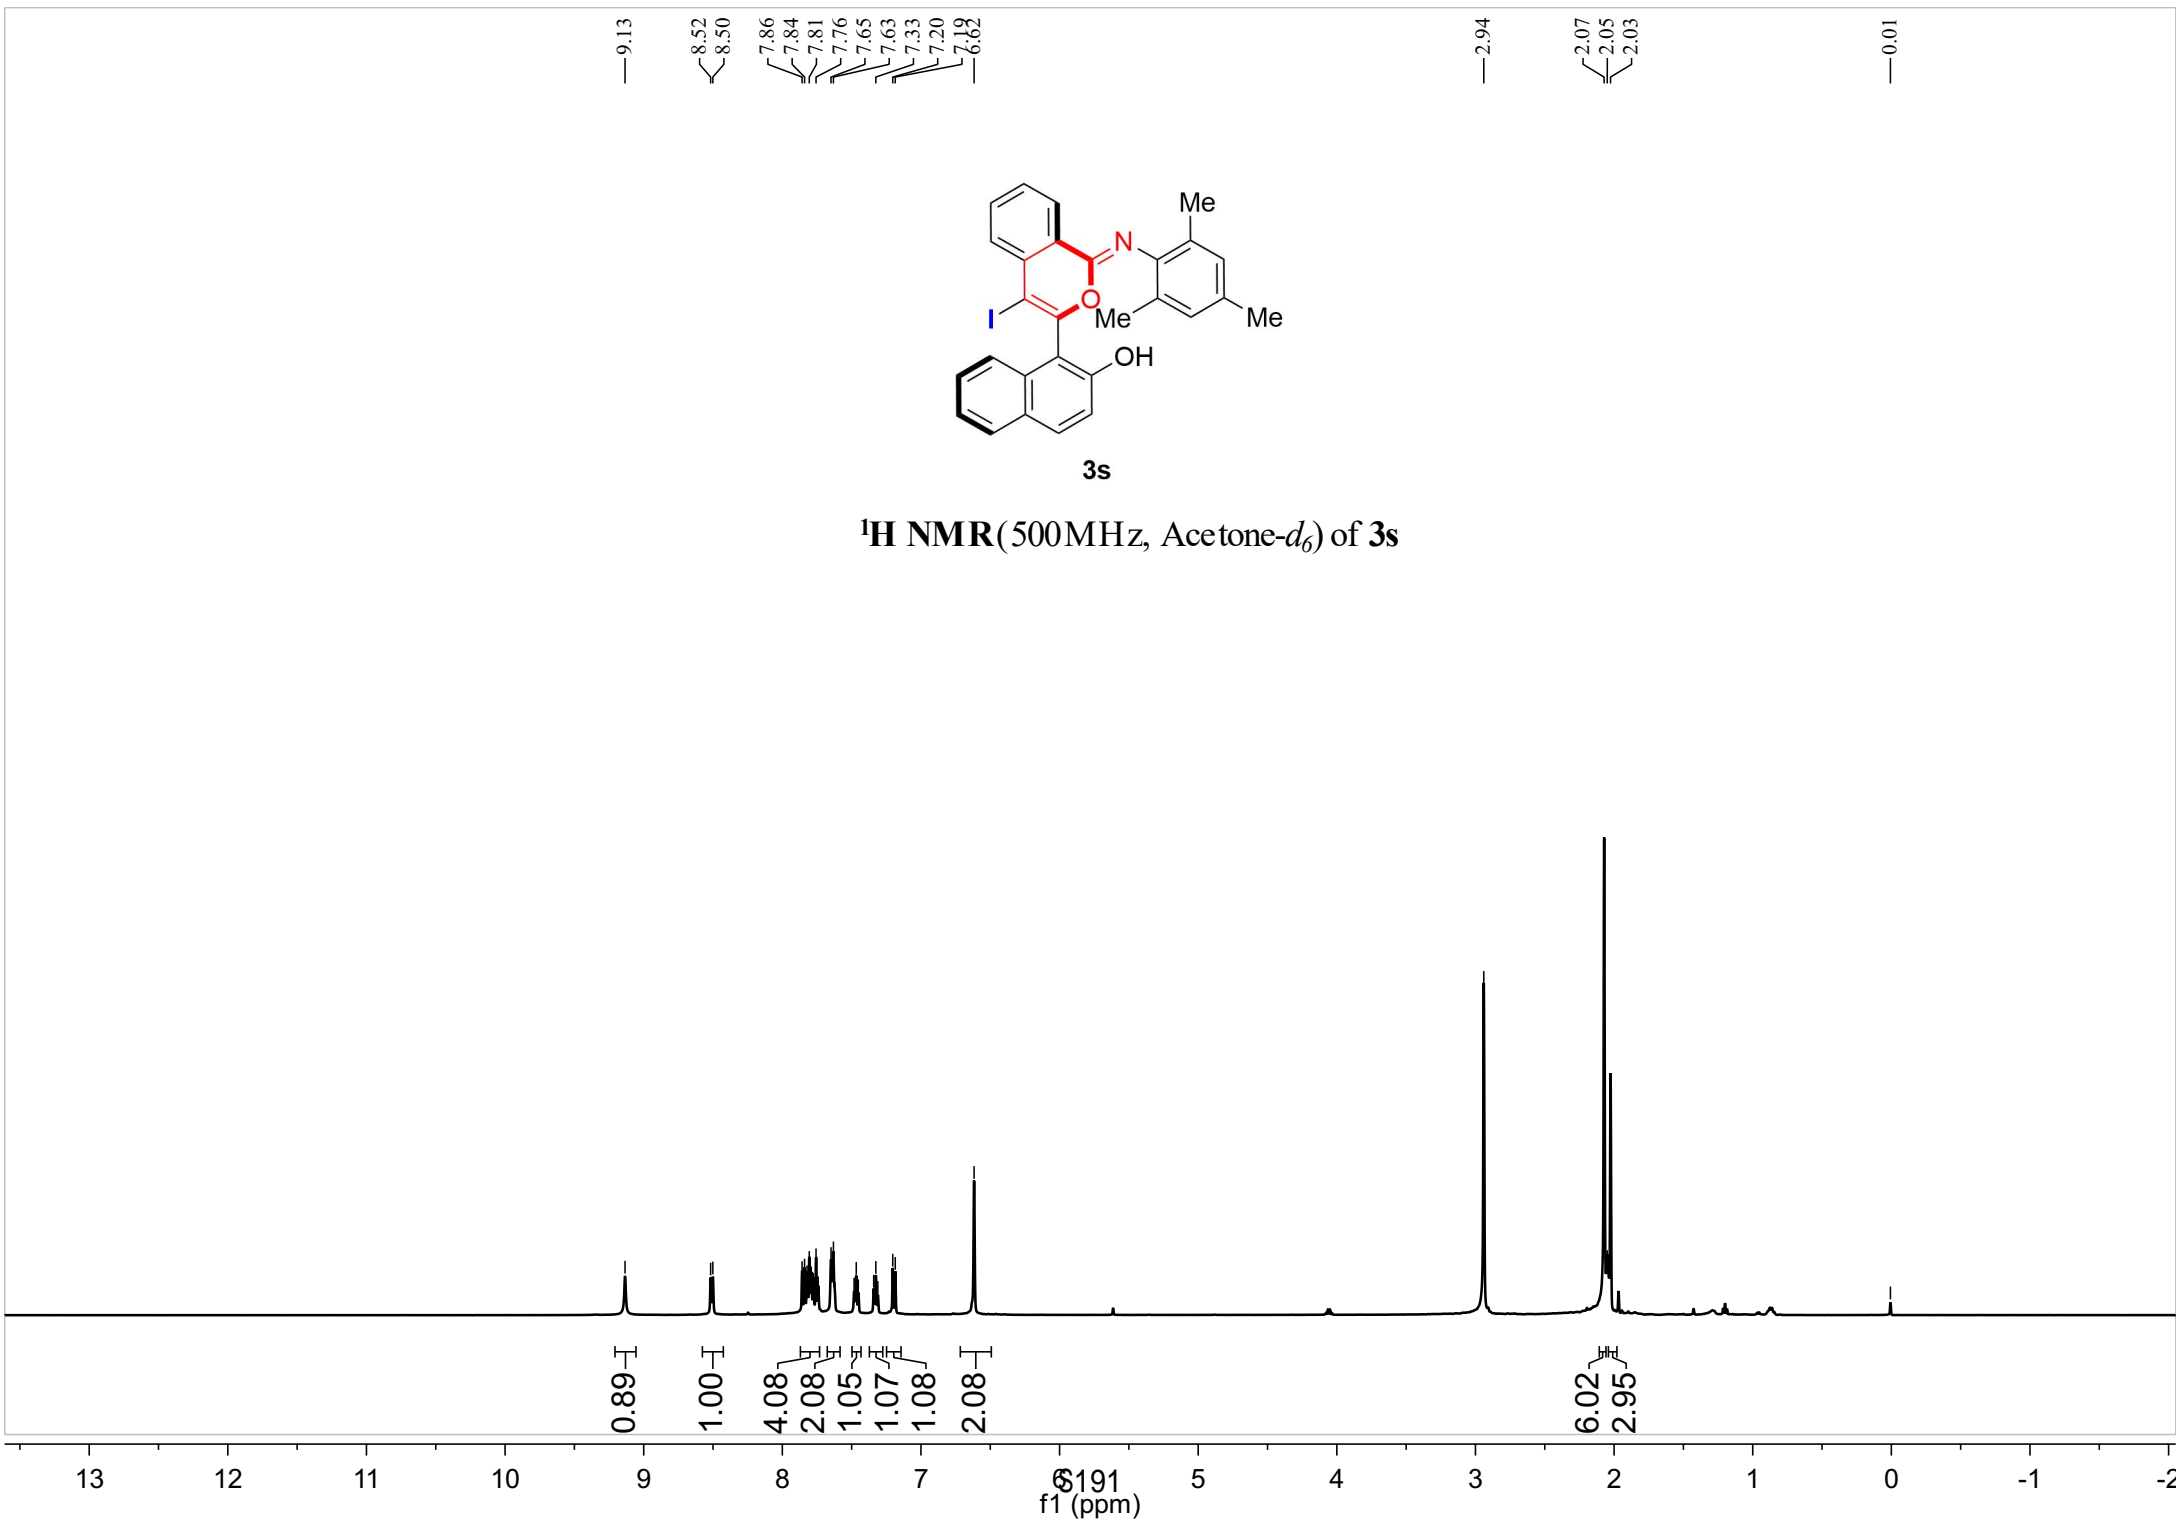

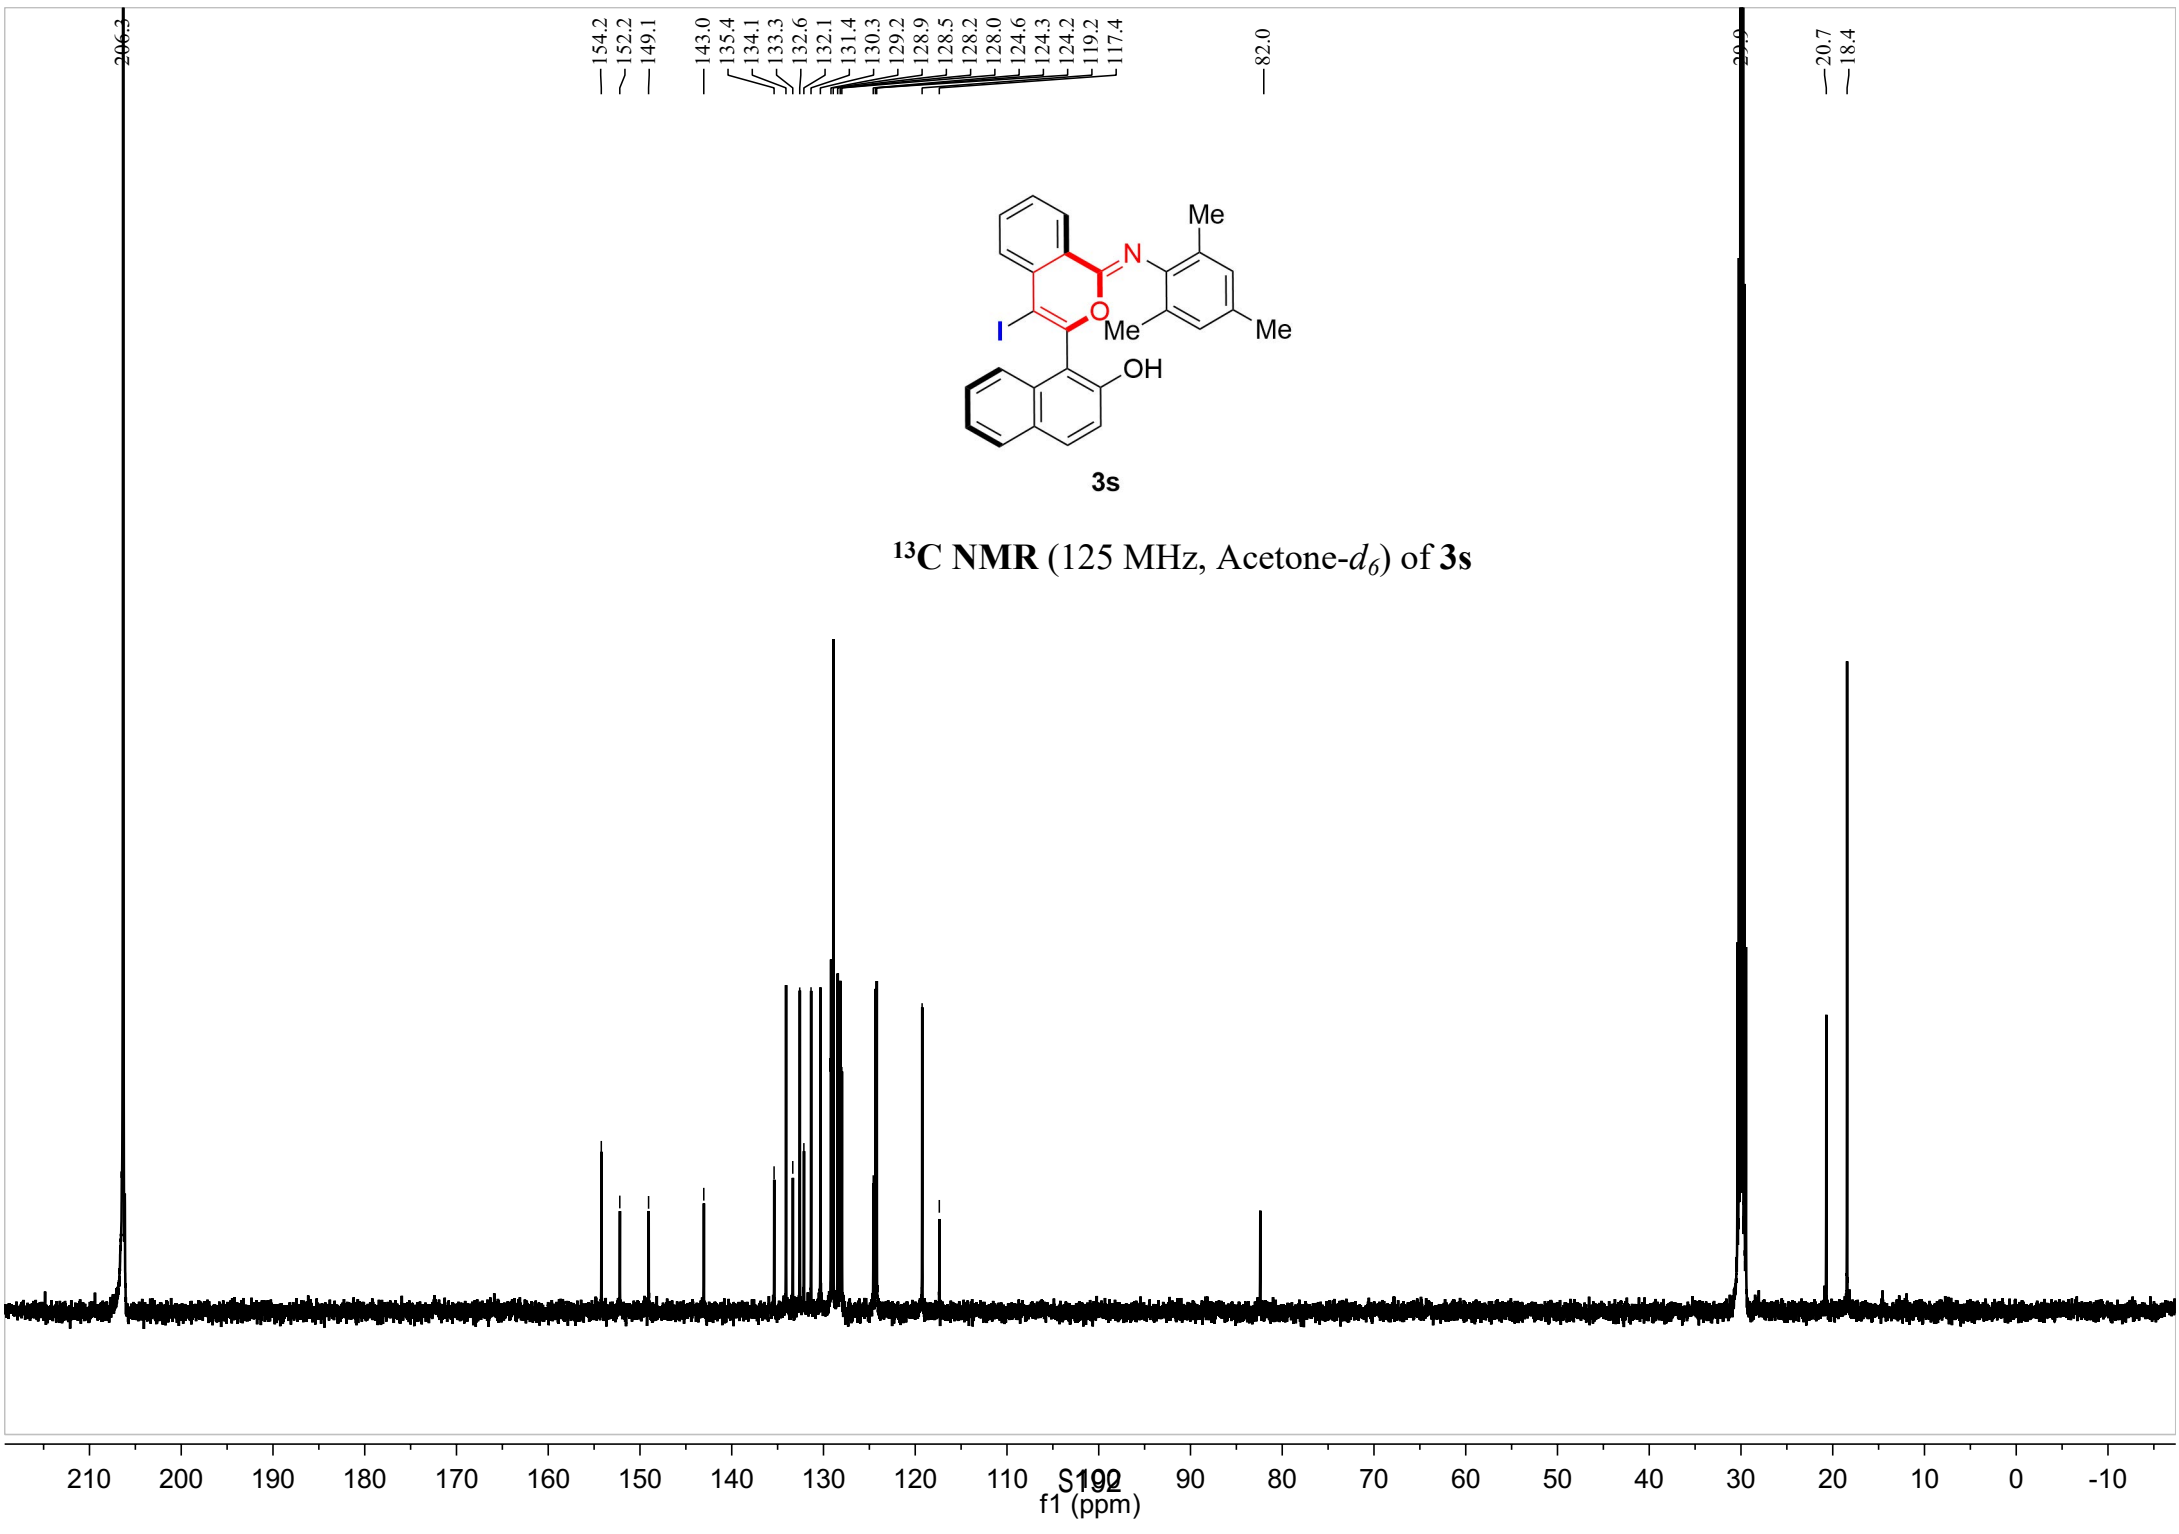



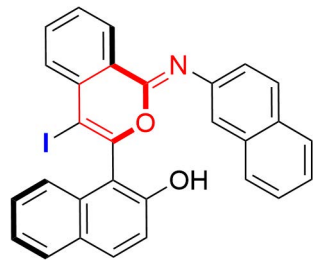

3t

<sup>1</sup>H NMR (400 MHz, DMSO-d<sub>6</sub>) of 3t

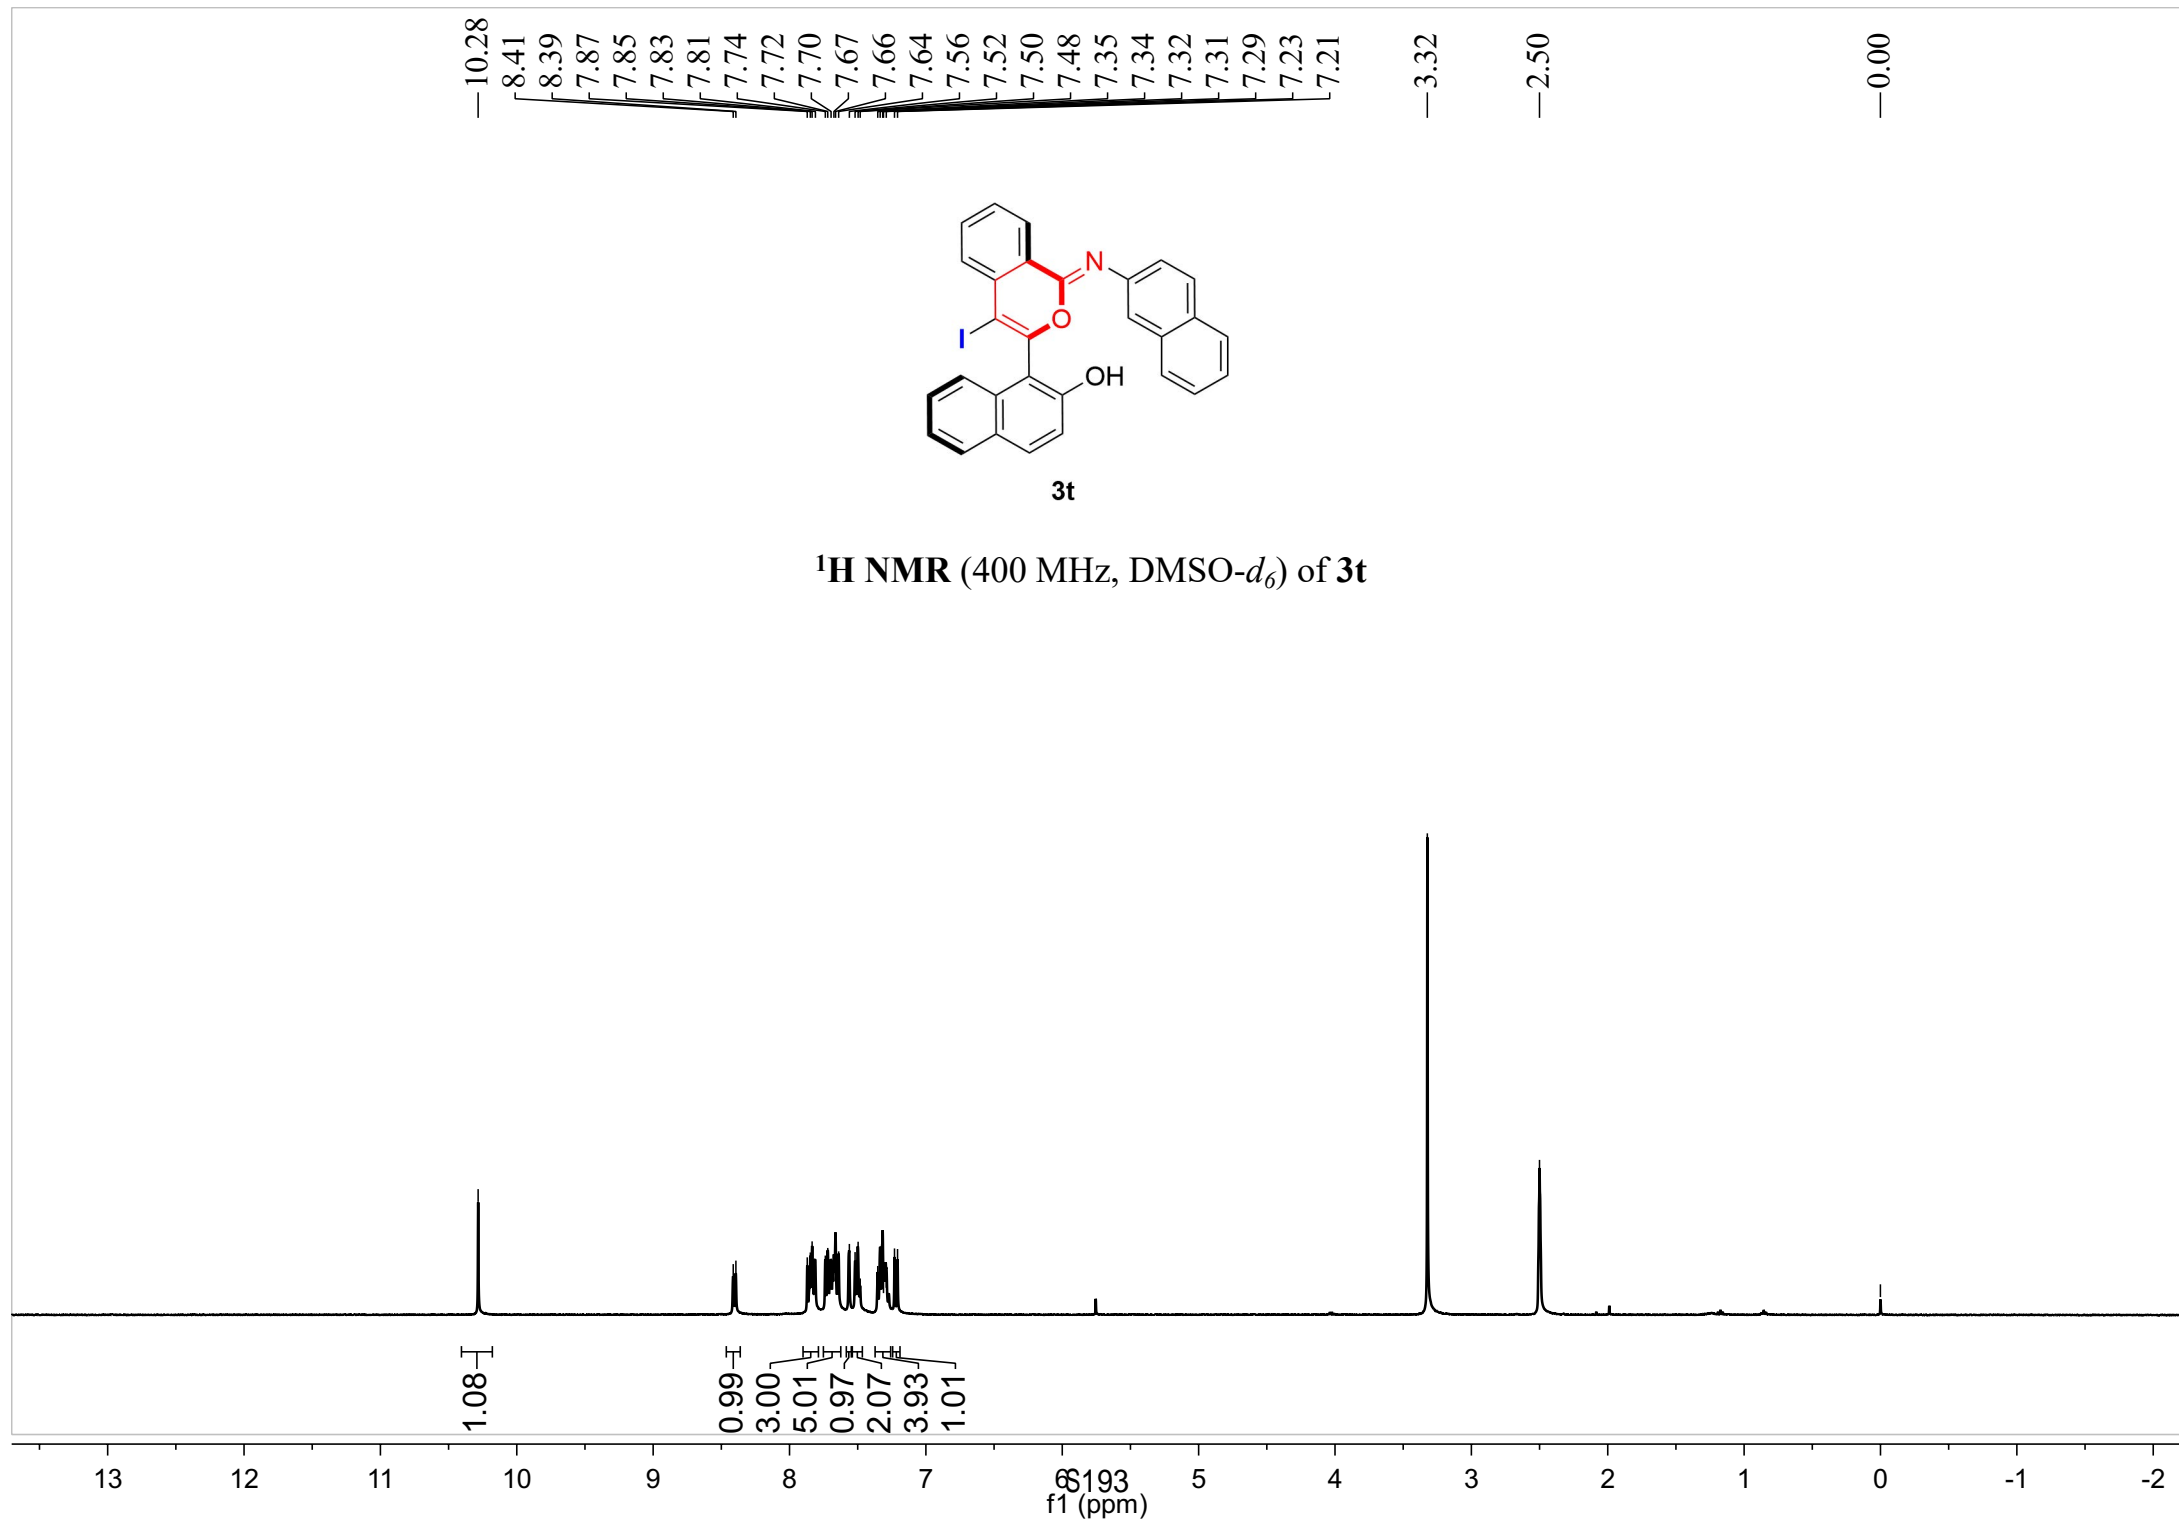

153.6  
150.6  
149.7  
143.4  
134.4  
133.7  
133.5  
132.0  
131.6  
130.3  
130.1  
129.6  
128.1  
127.9  
127.4  
127.4  
127.3  
127.0  
126.9  
126.0  
124.5  
123.4  
123.3  
123.1  
118.8  
118.3  
115.3  
82.3

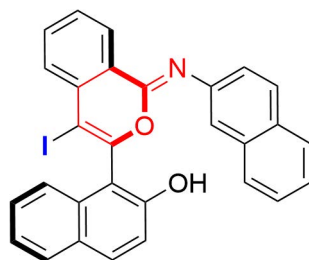

3t

<sup>13</sup>C NMR (100 MHz, DMSO-*d*<sub>6</sub>) of 3t

210 200 190 180 170 160 150 140 130 120 110 100 90 80 70 60 50 40 30 20 10 0 -10  
S194  
f1 (ppm)

9.12 8.39 7.93 7.91 7.87 7.85 7.79 7.77 7.52 7.49 7.47 7.38 7.36 7.34 7.27 7.24 7.19 7.16 7.13 7.11 7.09 6.92 6.80 2.05

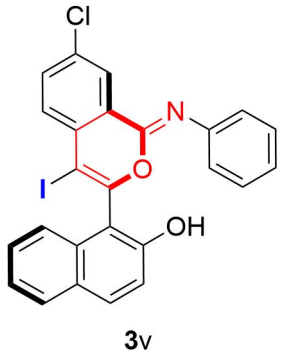

<sup>1</sup>H NMR (400 MHz, Acetone-d<sub>6</sub>) of 3v

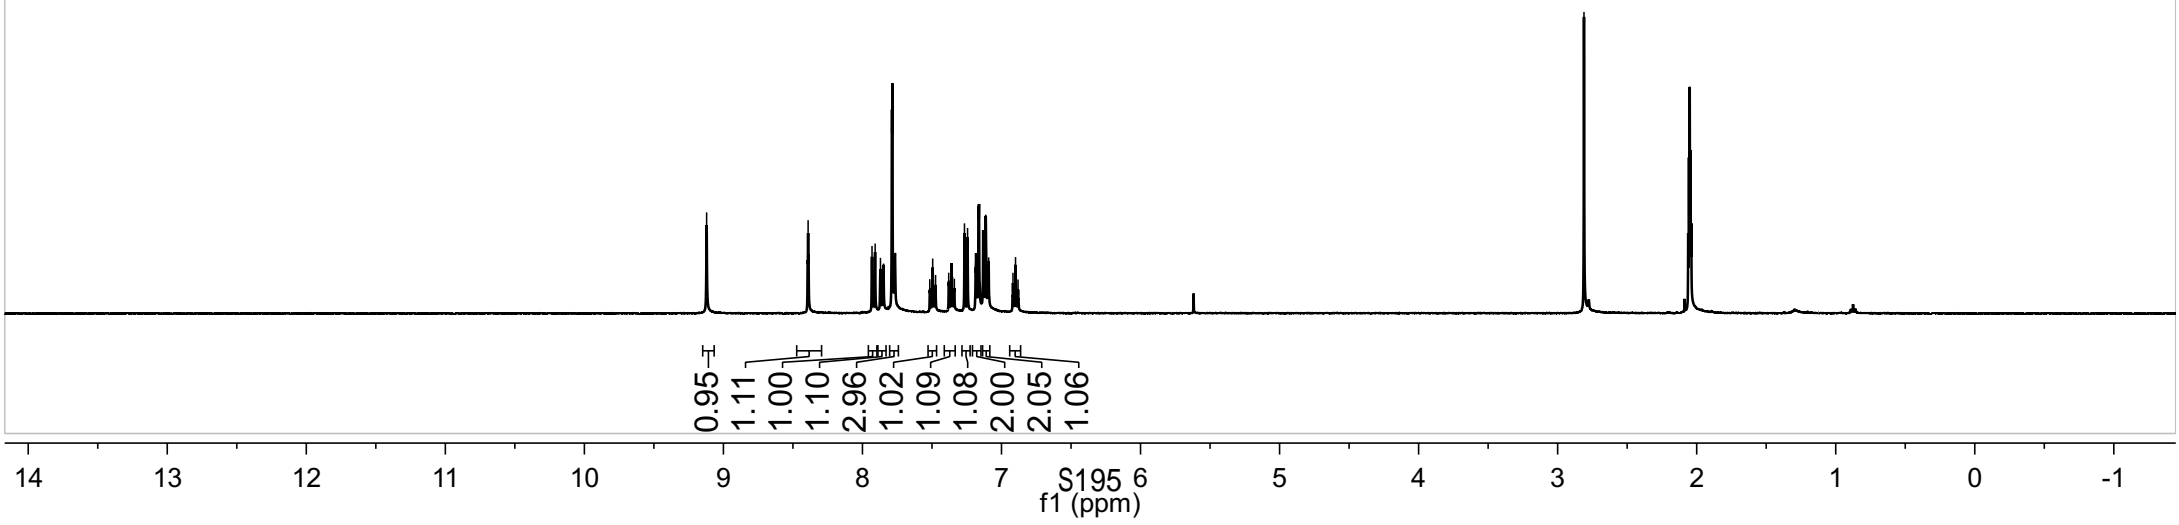

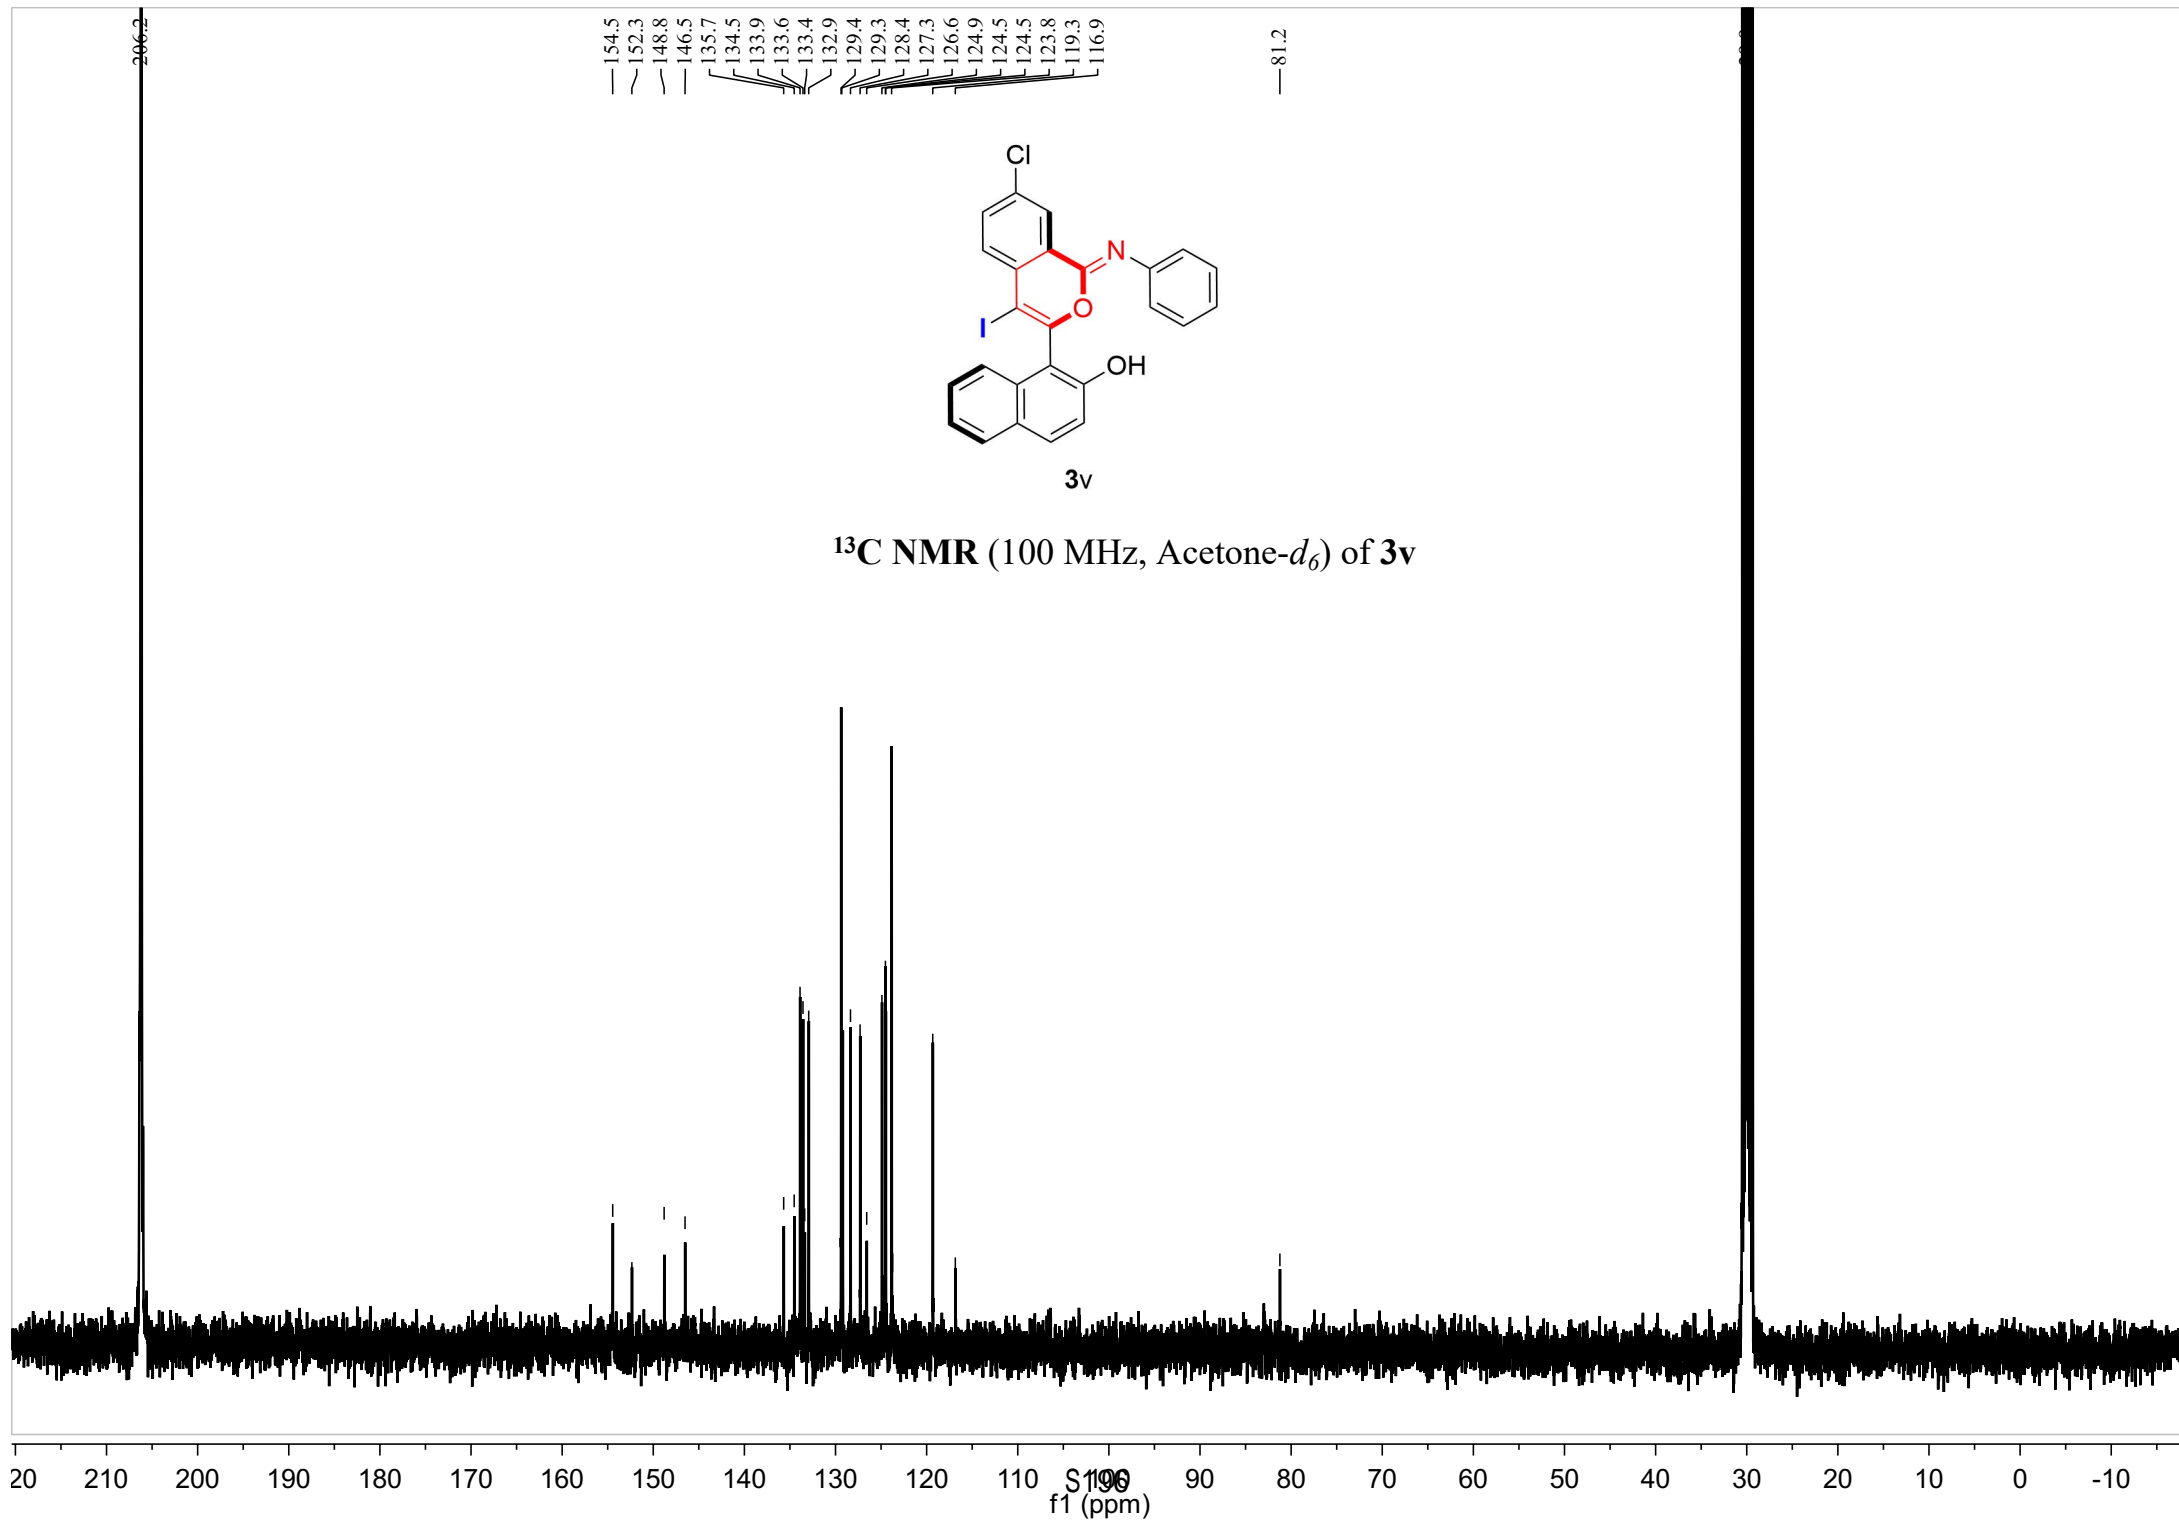

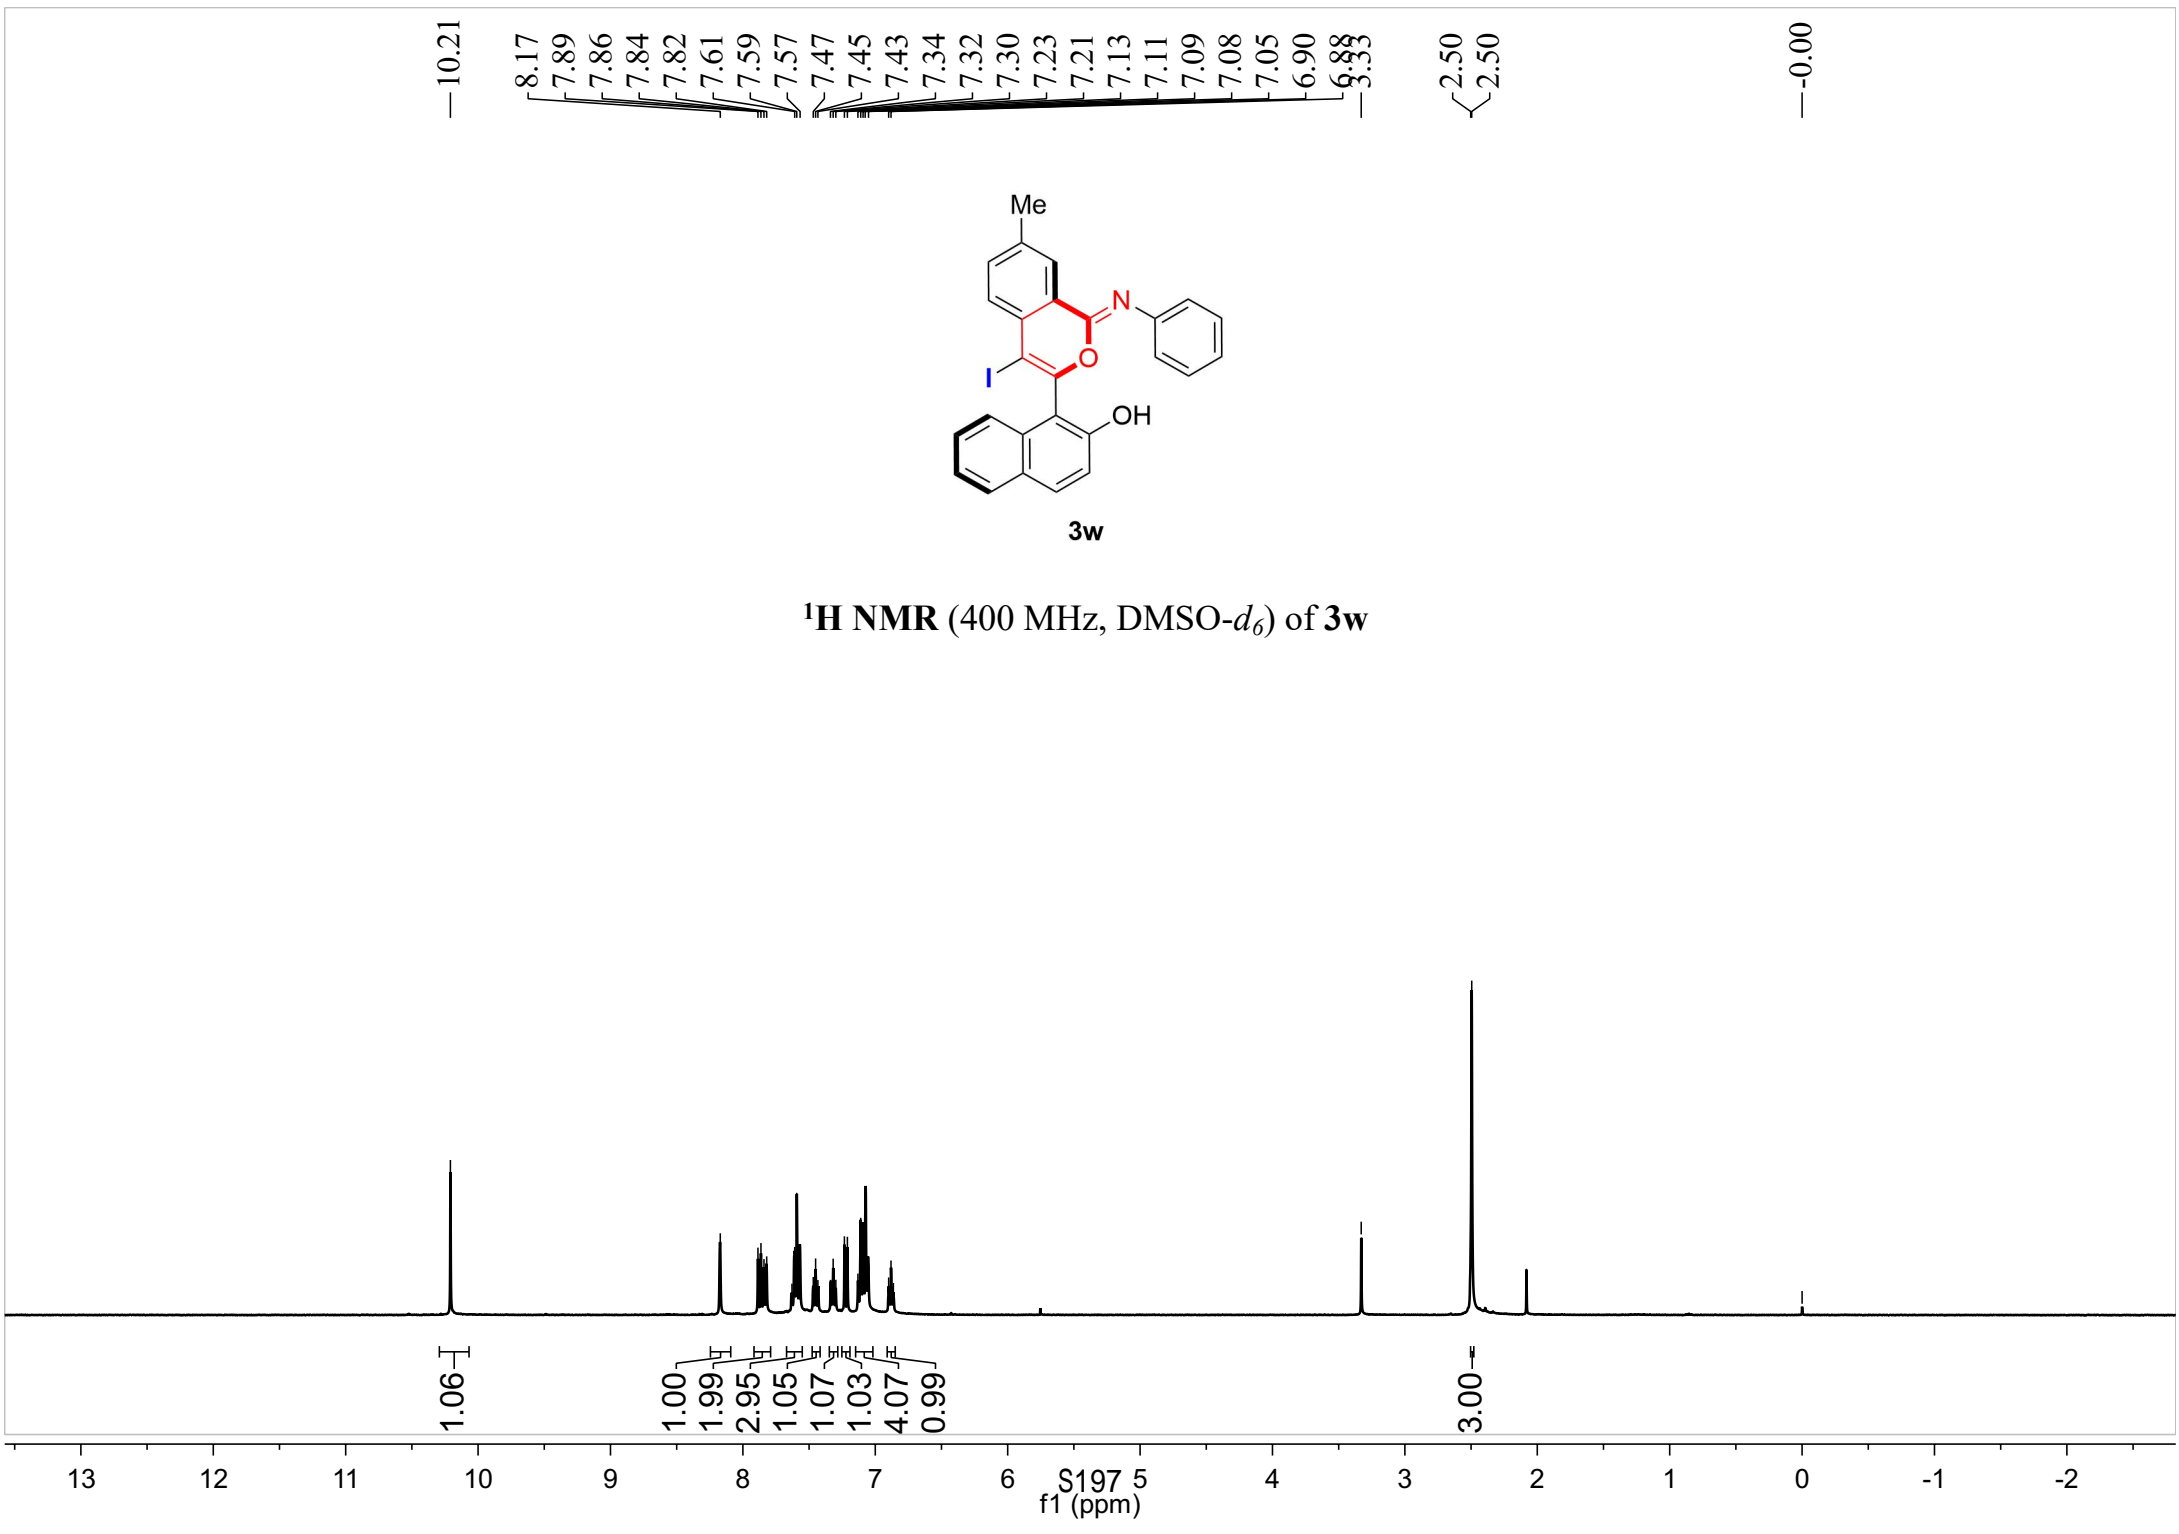

153.7  
149.7  
149.2  
145.8  
139.4  
134.4  
132.1  
132.0  
131.5  
130.2  
128.5  
128.1  
127.4  
127.2  
126.8  
123.4  
123.2  
123.1  
123.1  
122.4  
118.4  
115.4

82.1

20.8

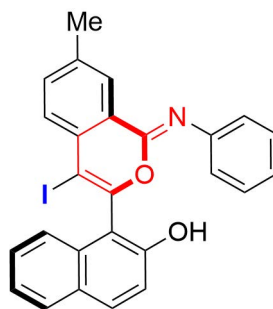

**3w**

**$^{13}\text{C}$  NMR (100 MHz, DMSO- $d_6$ ) of **3w****

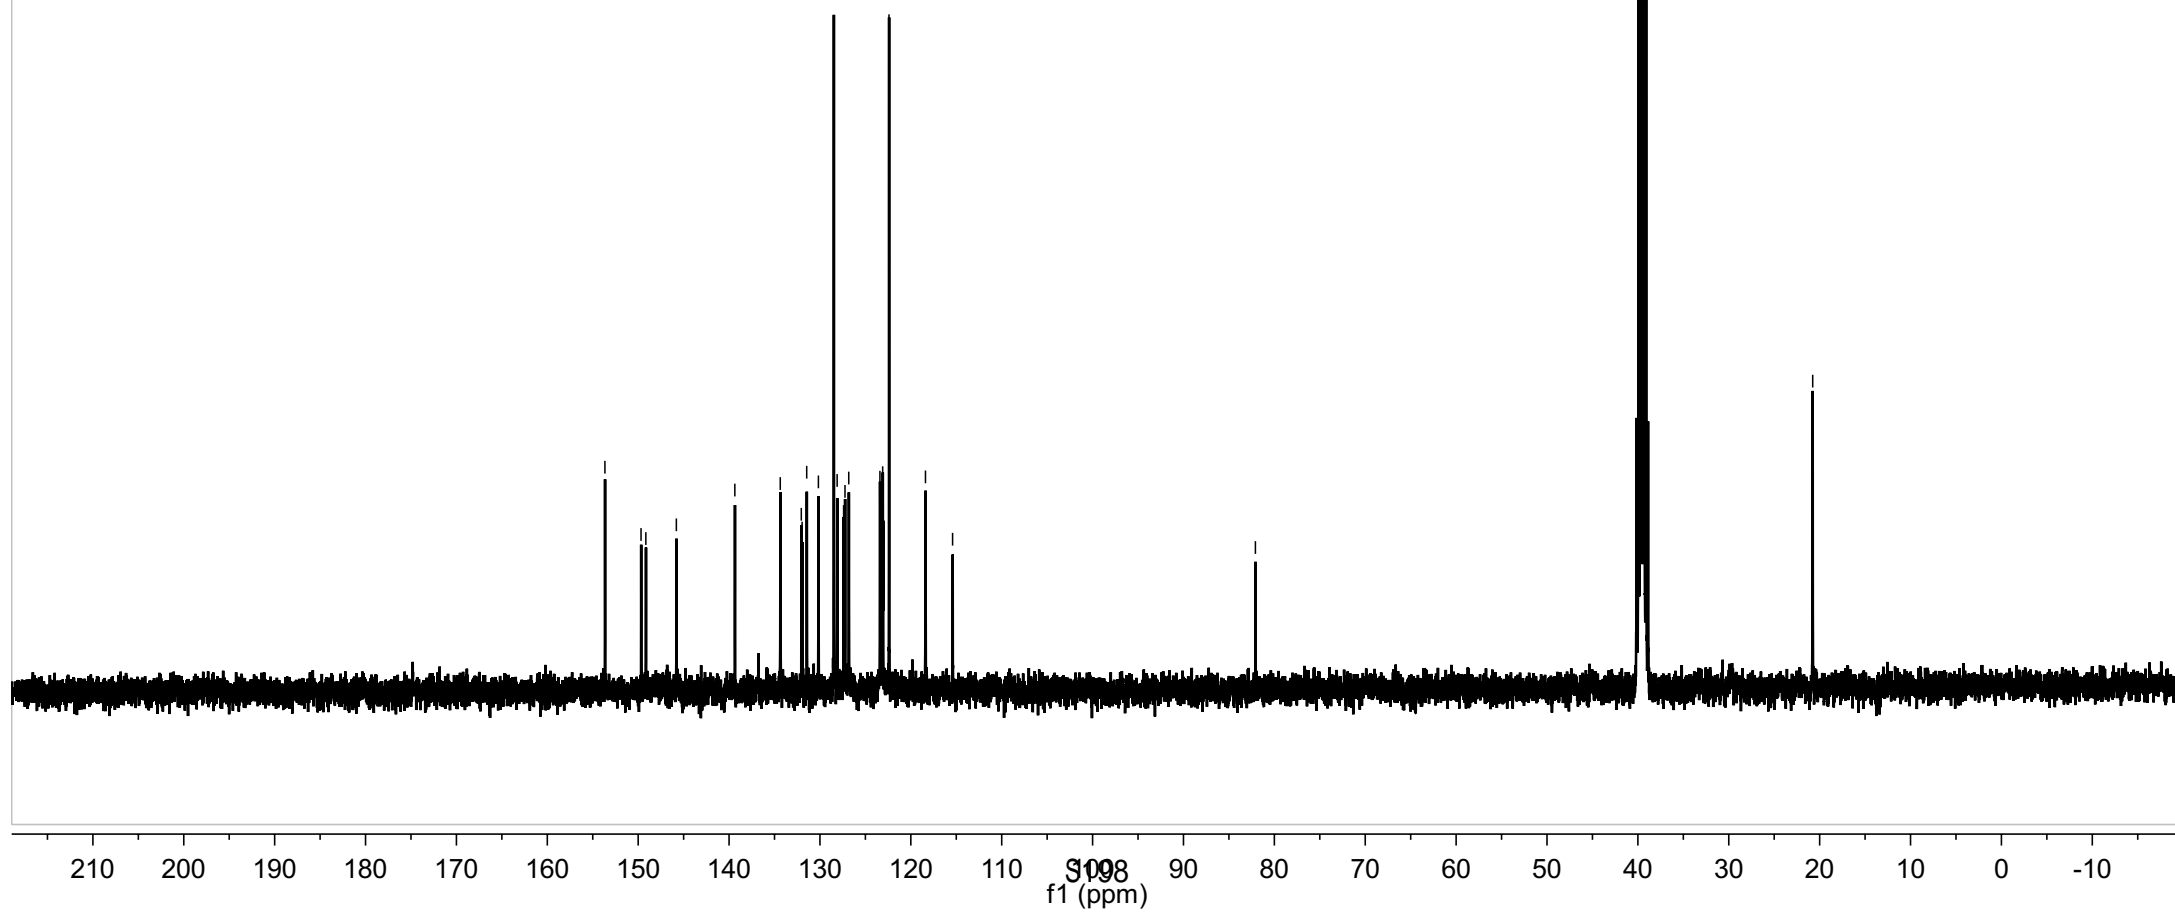

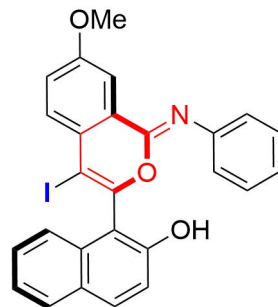

**3x**

$^1\text{H NMR}$  (400 MHz, Acetone- $d_6$ ) of **3x**

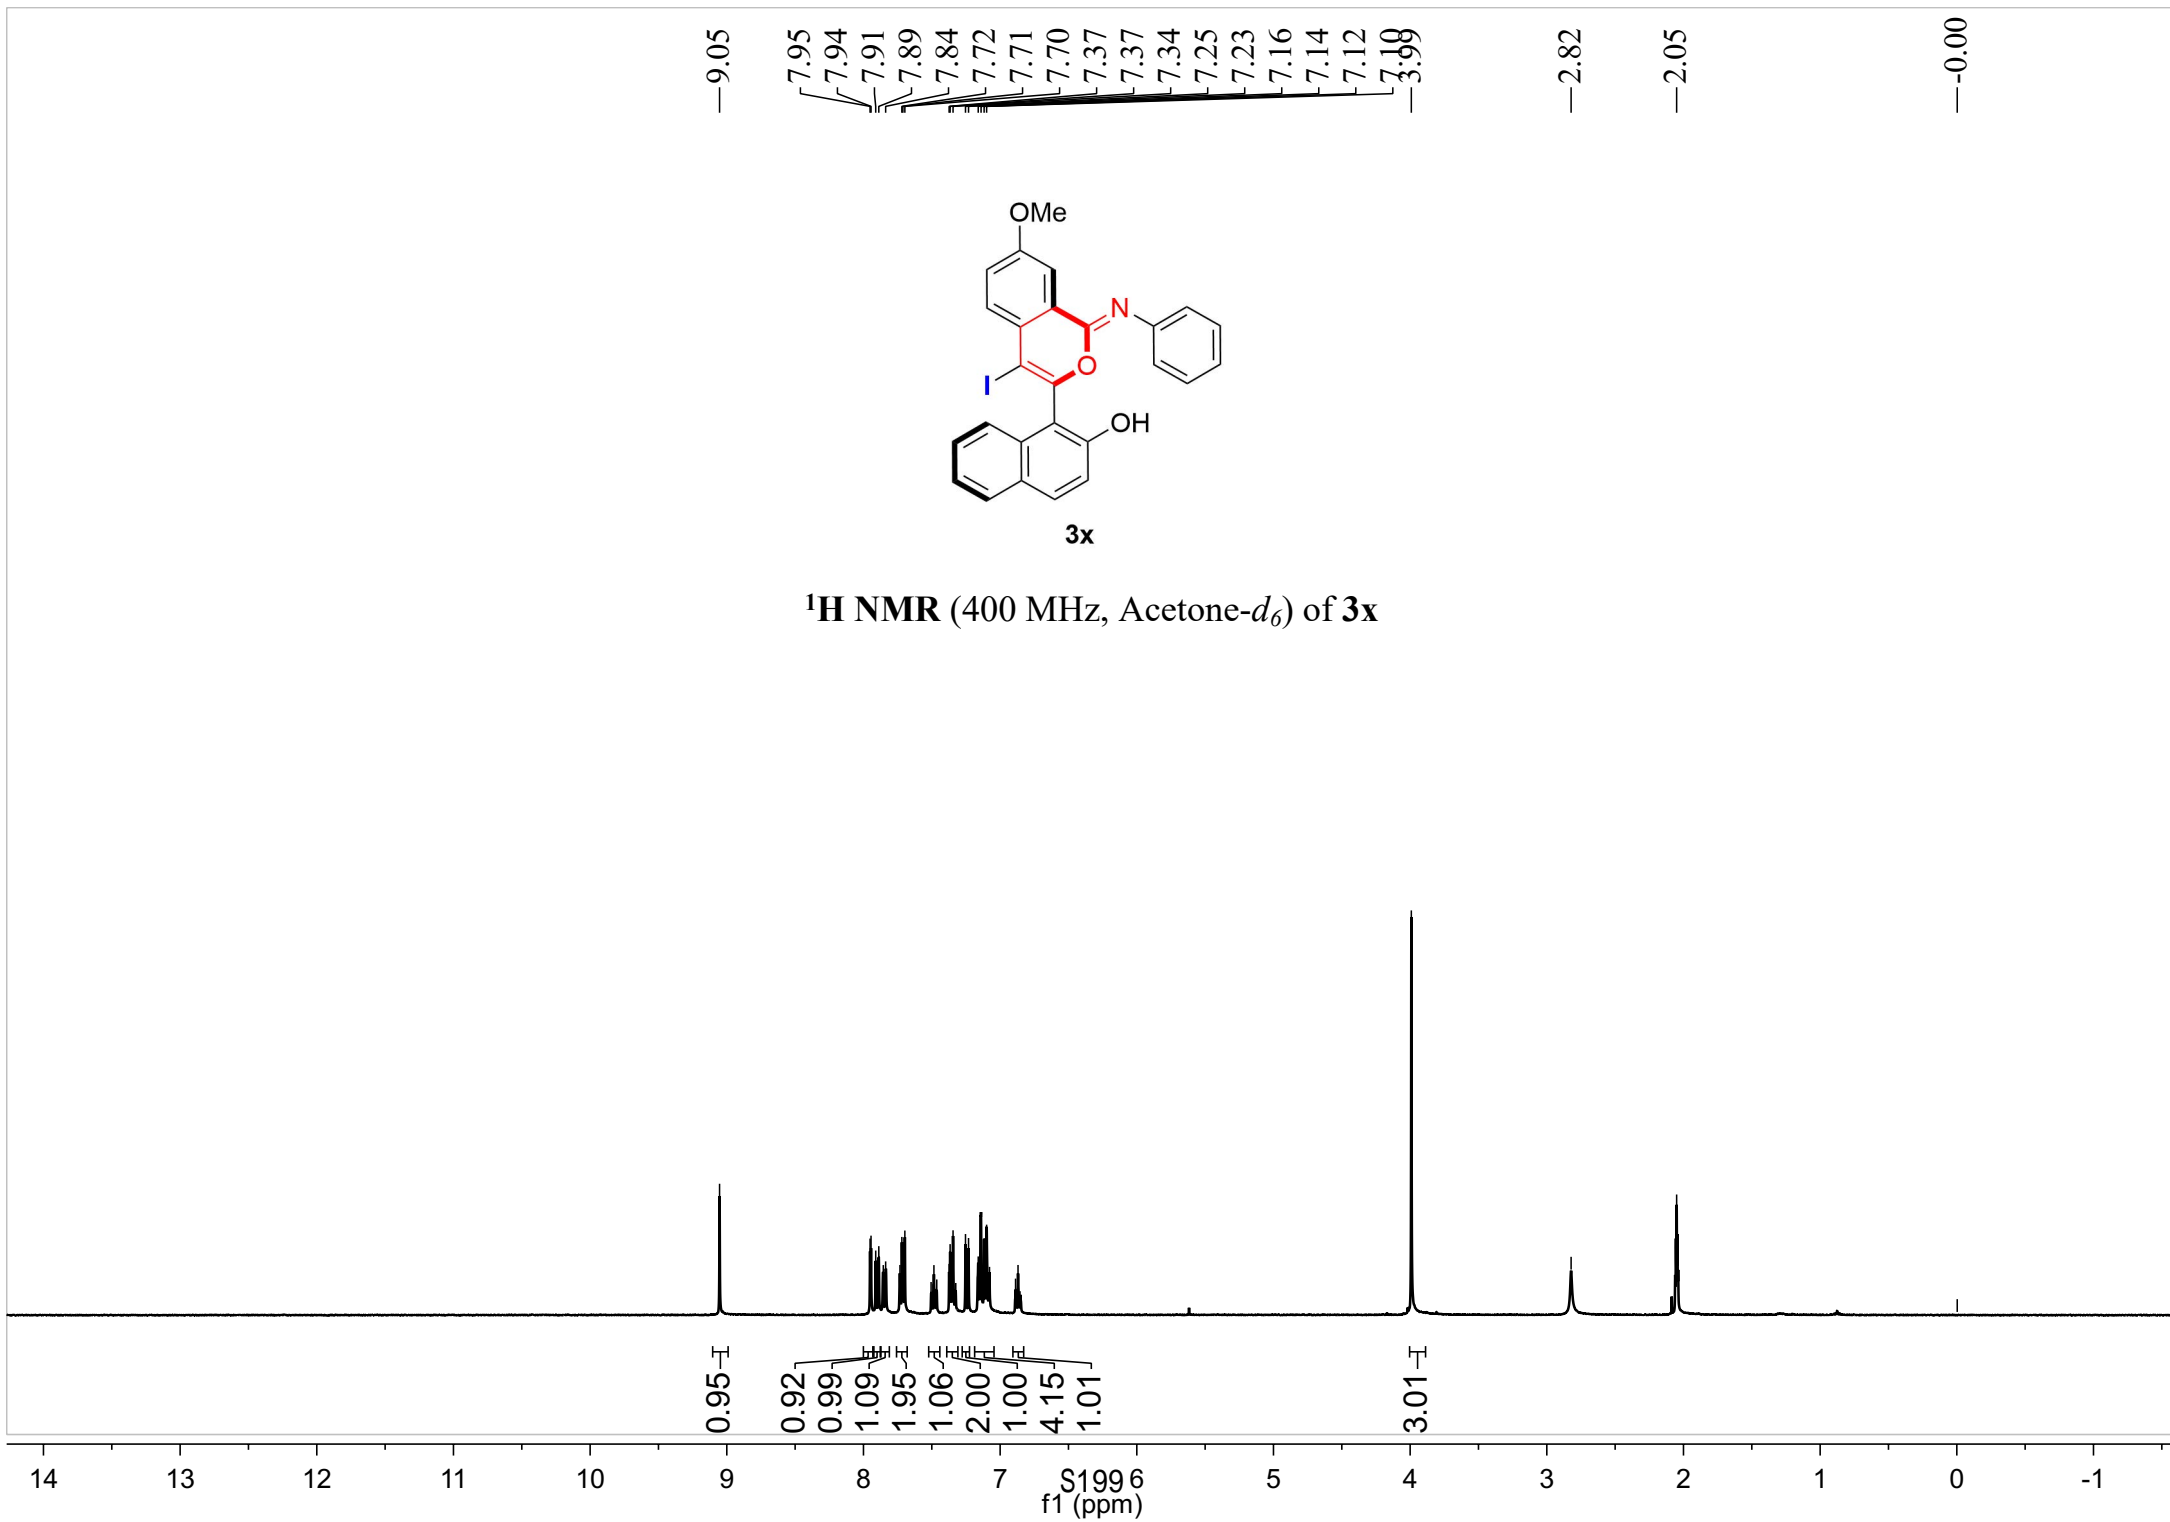

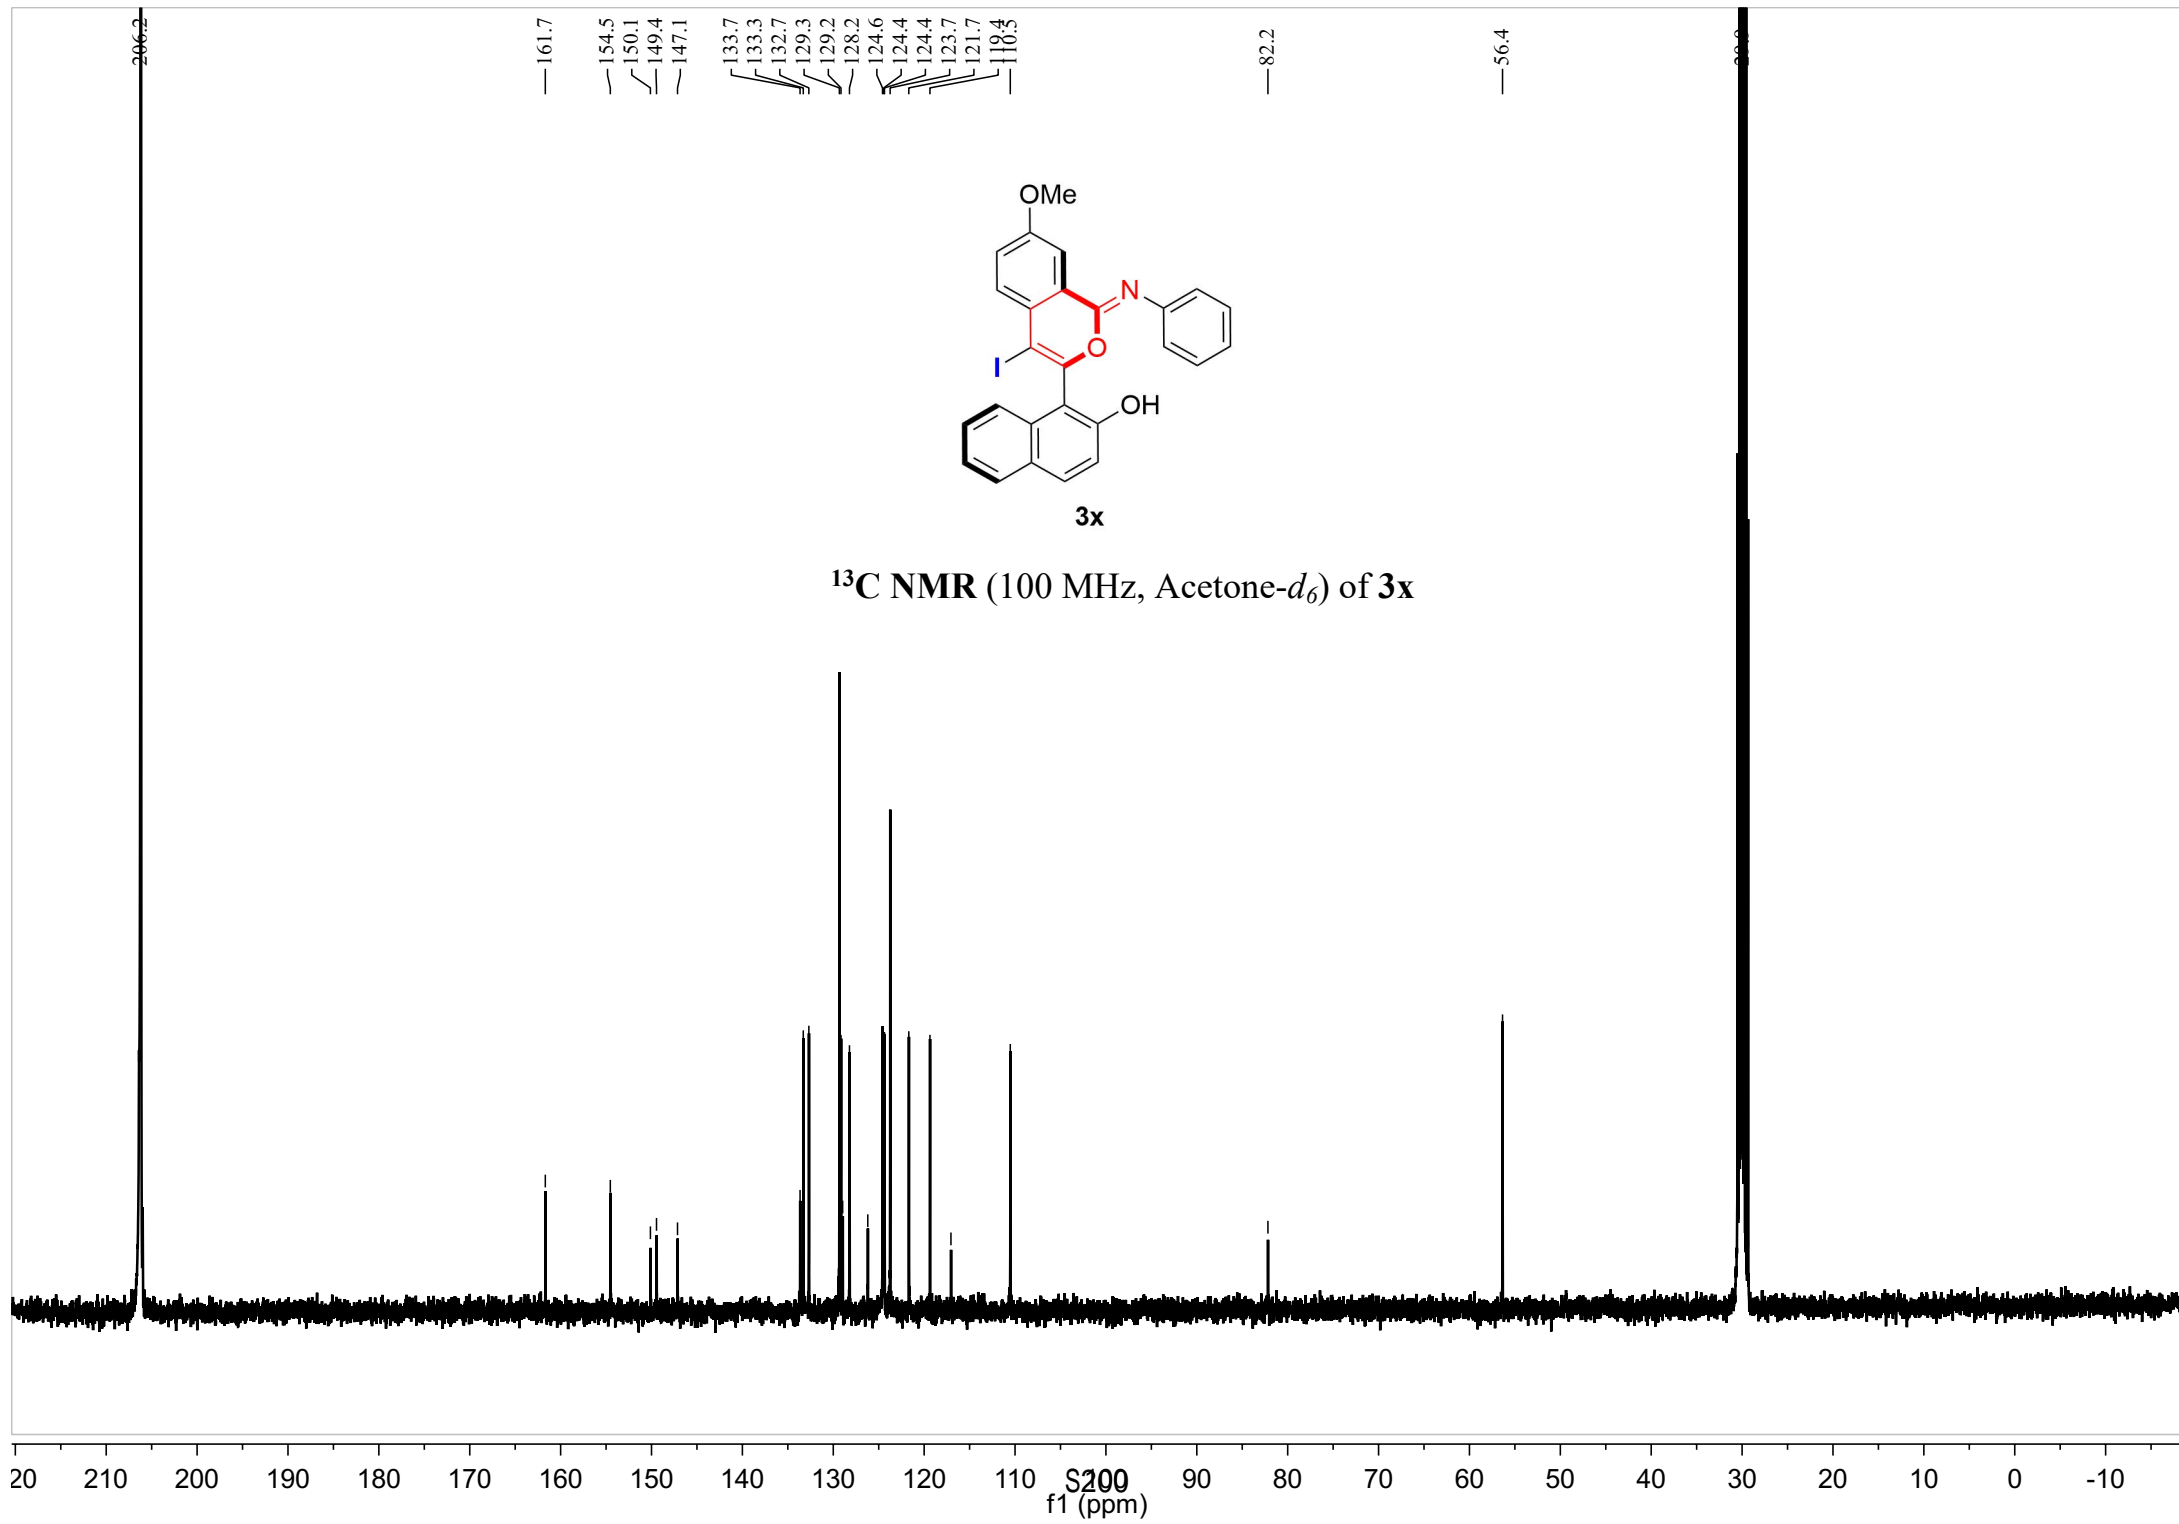



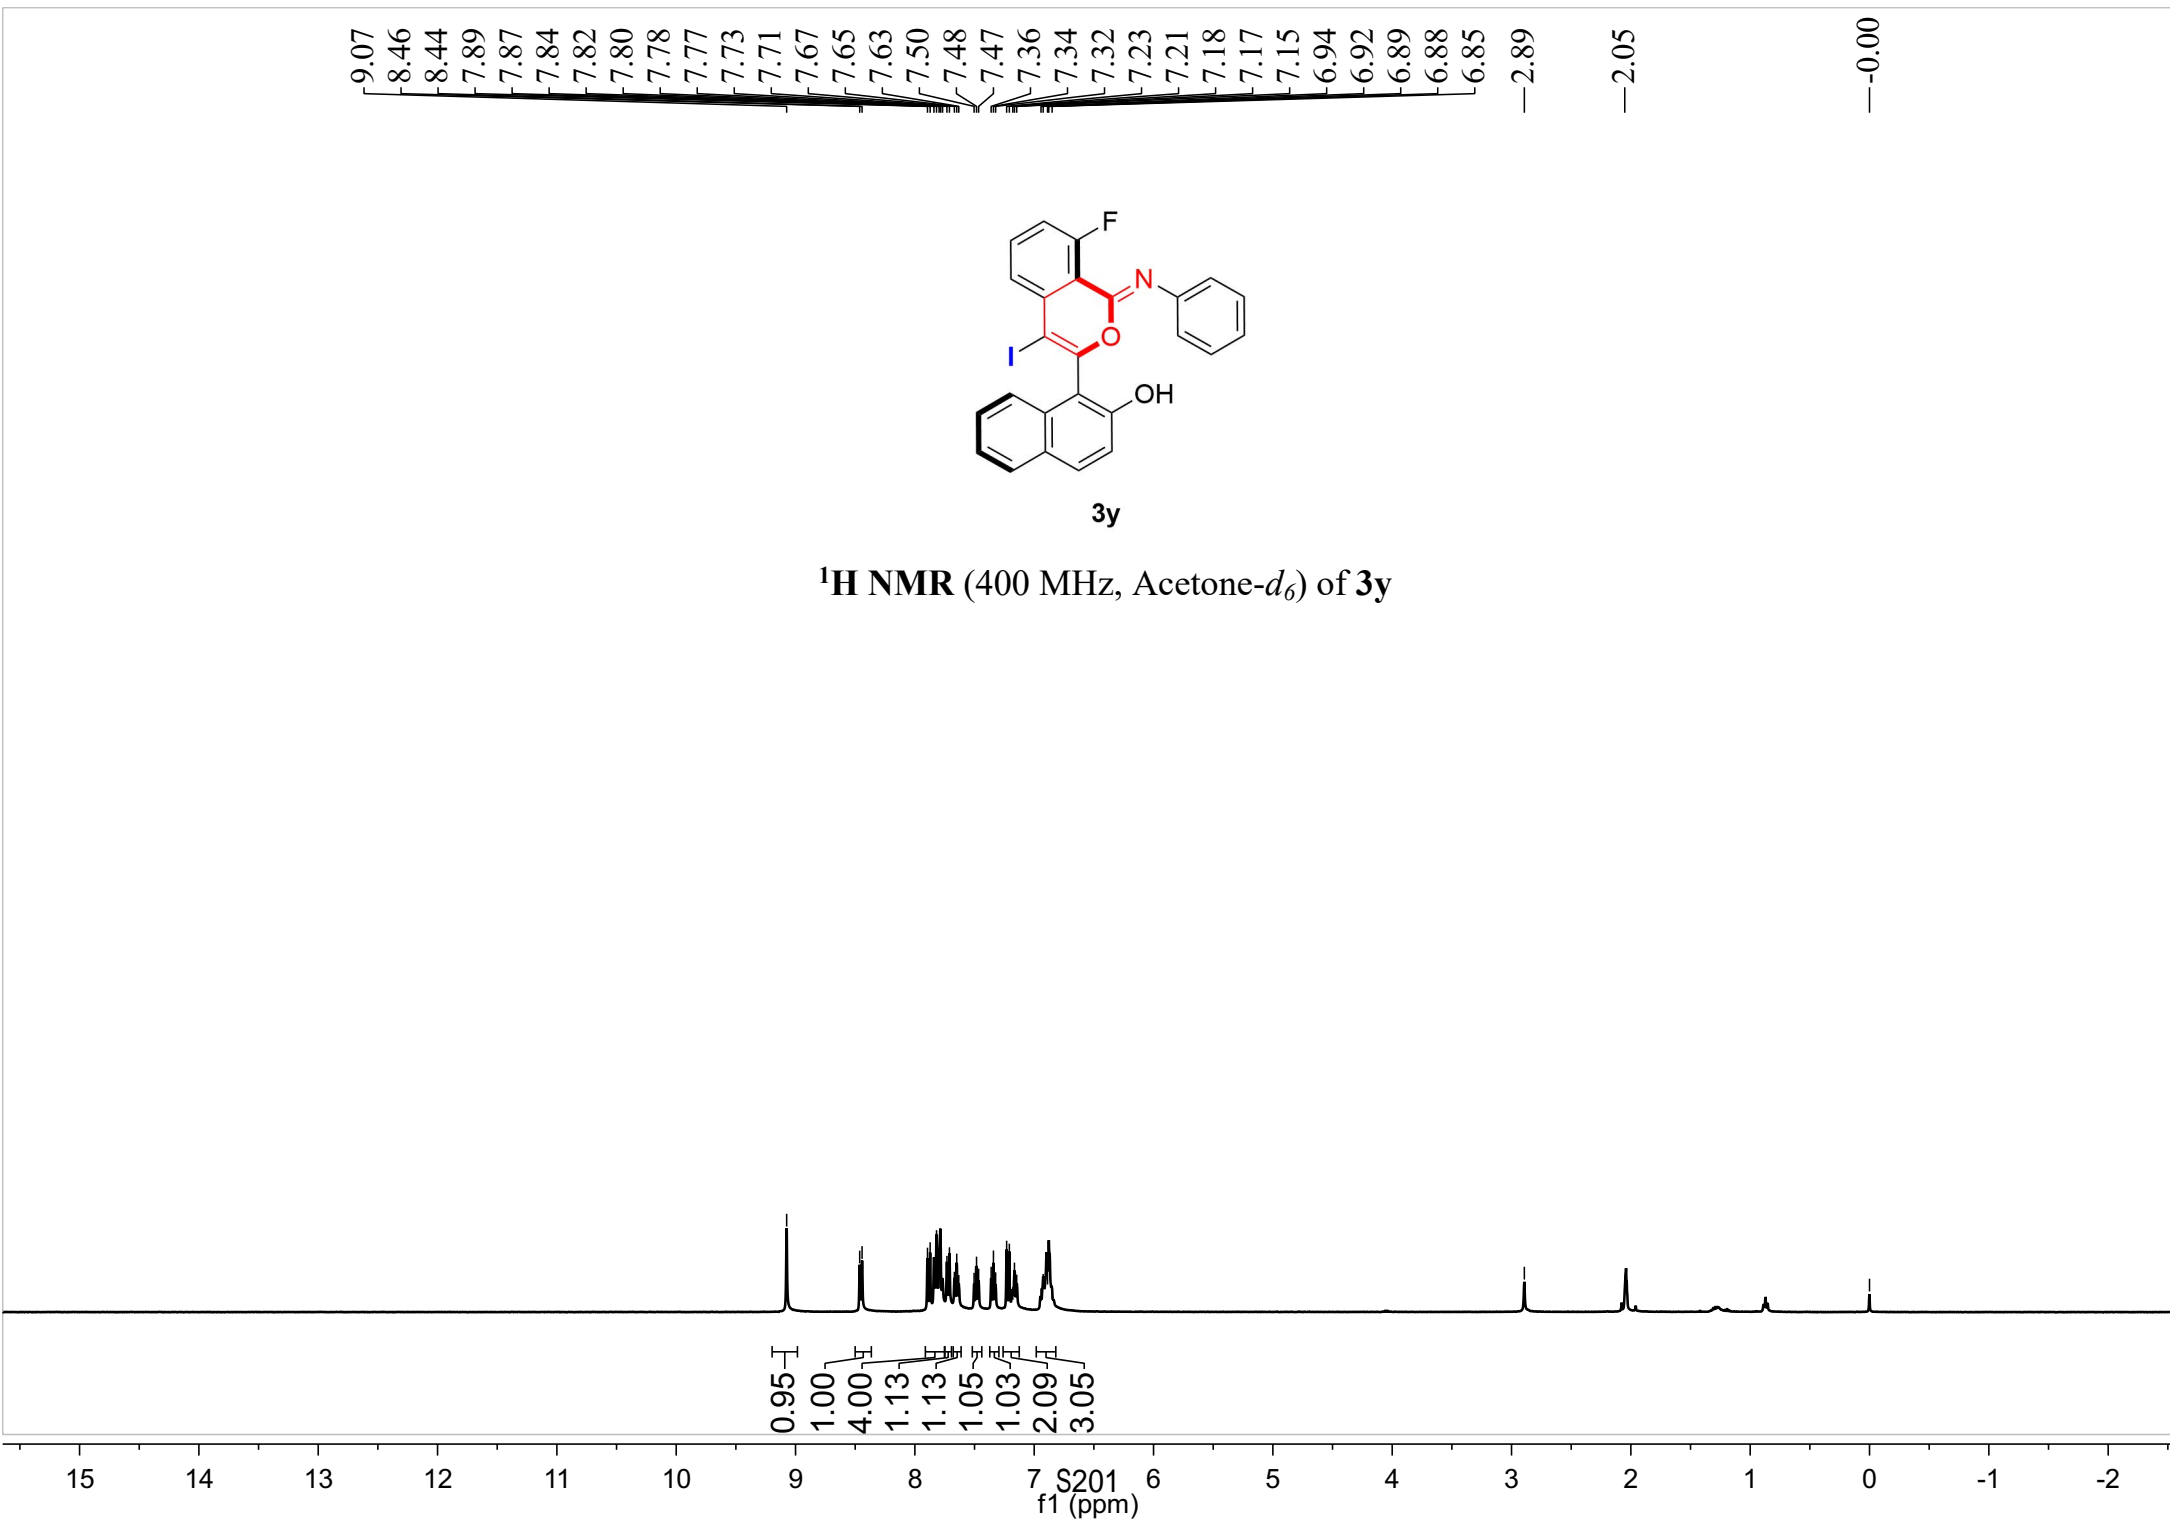

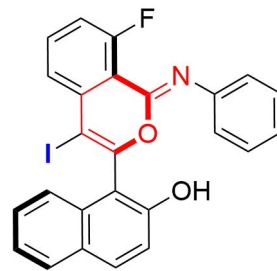

**3y**

**$^{19}\text{F}$  NMR (376 MHz, Acetone- $d_6$ ) of **3y****

--124.34

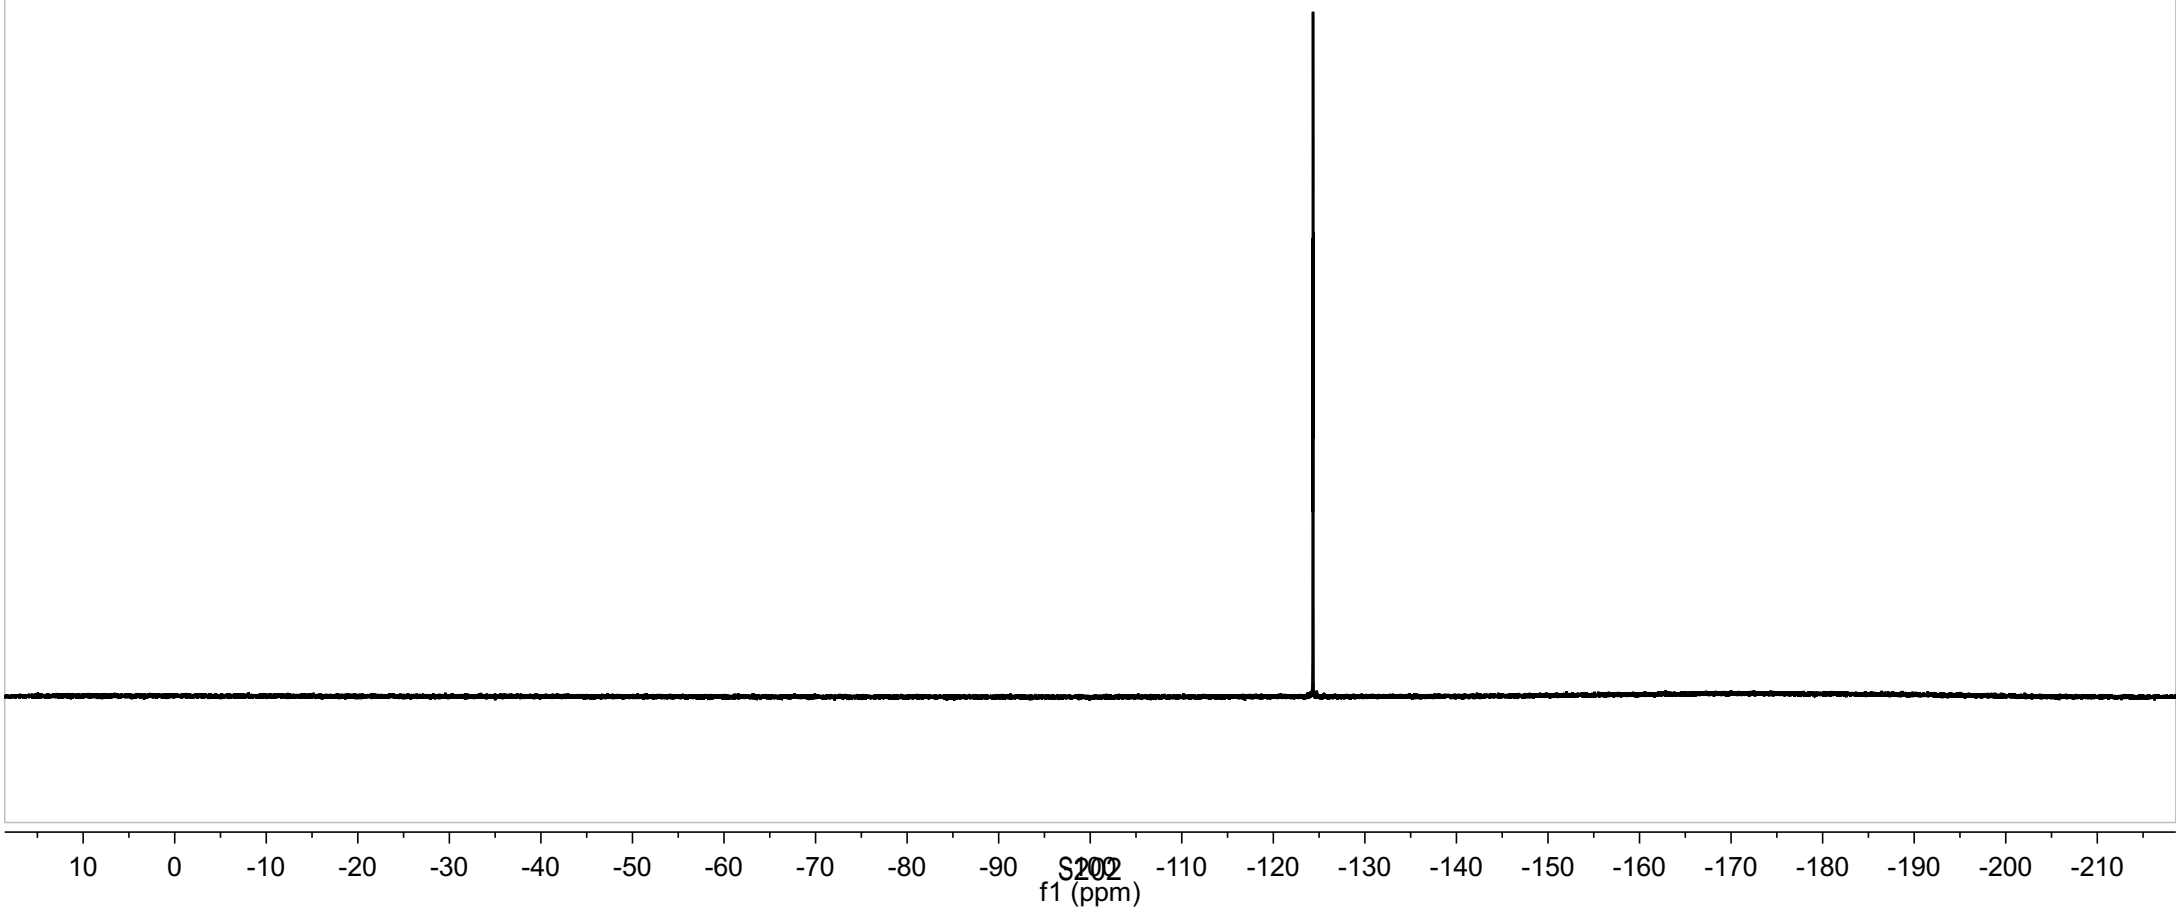

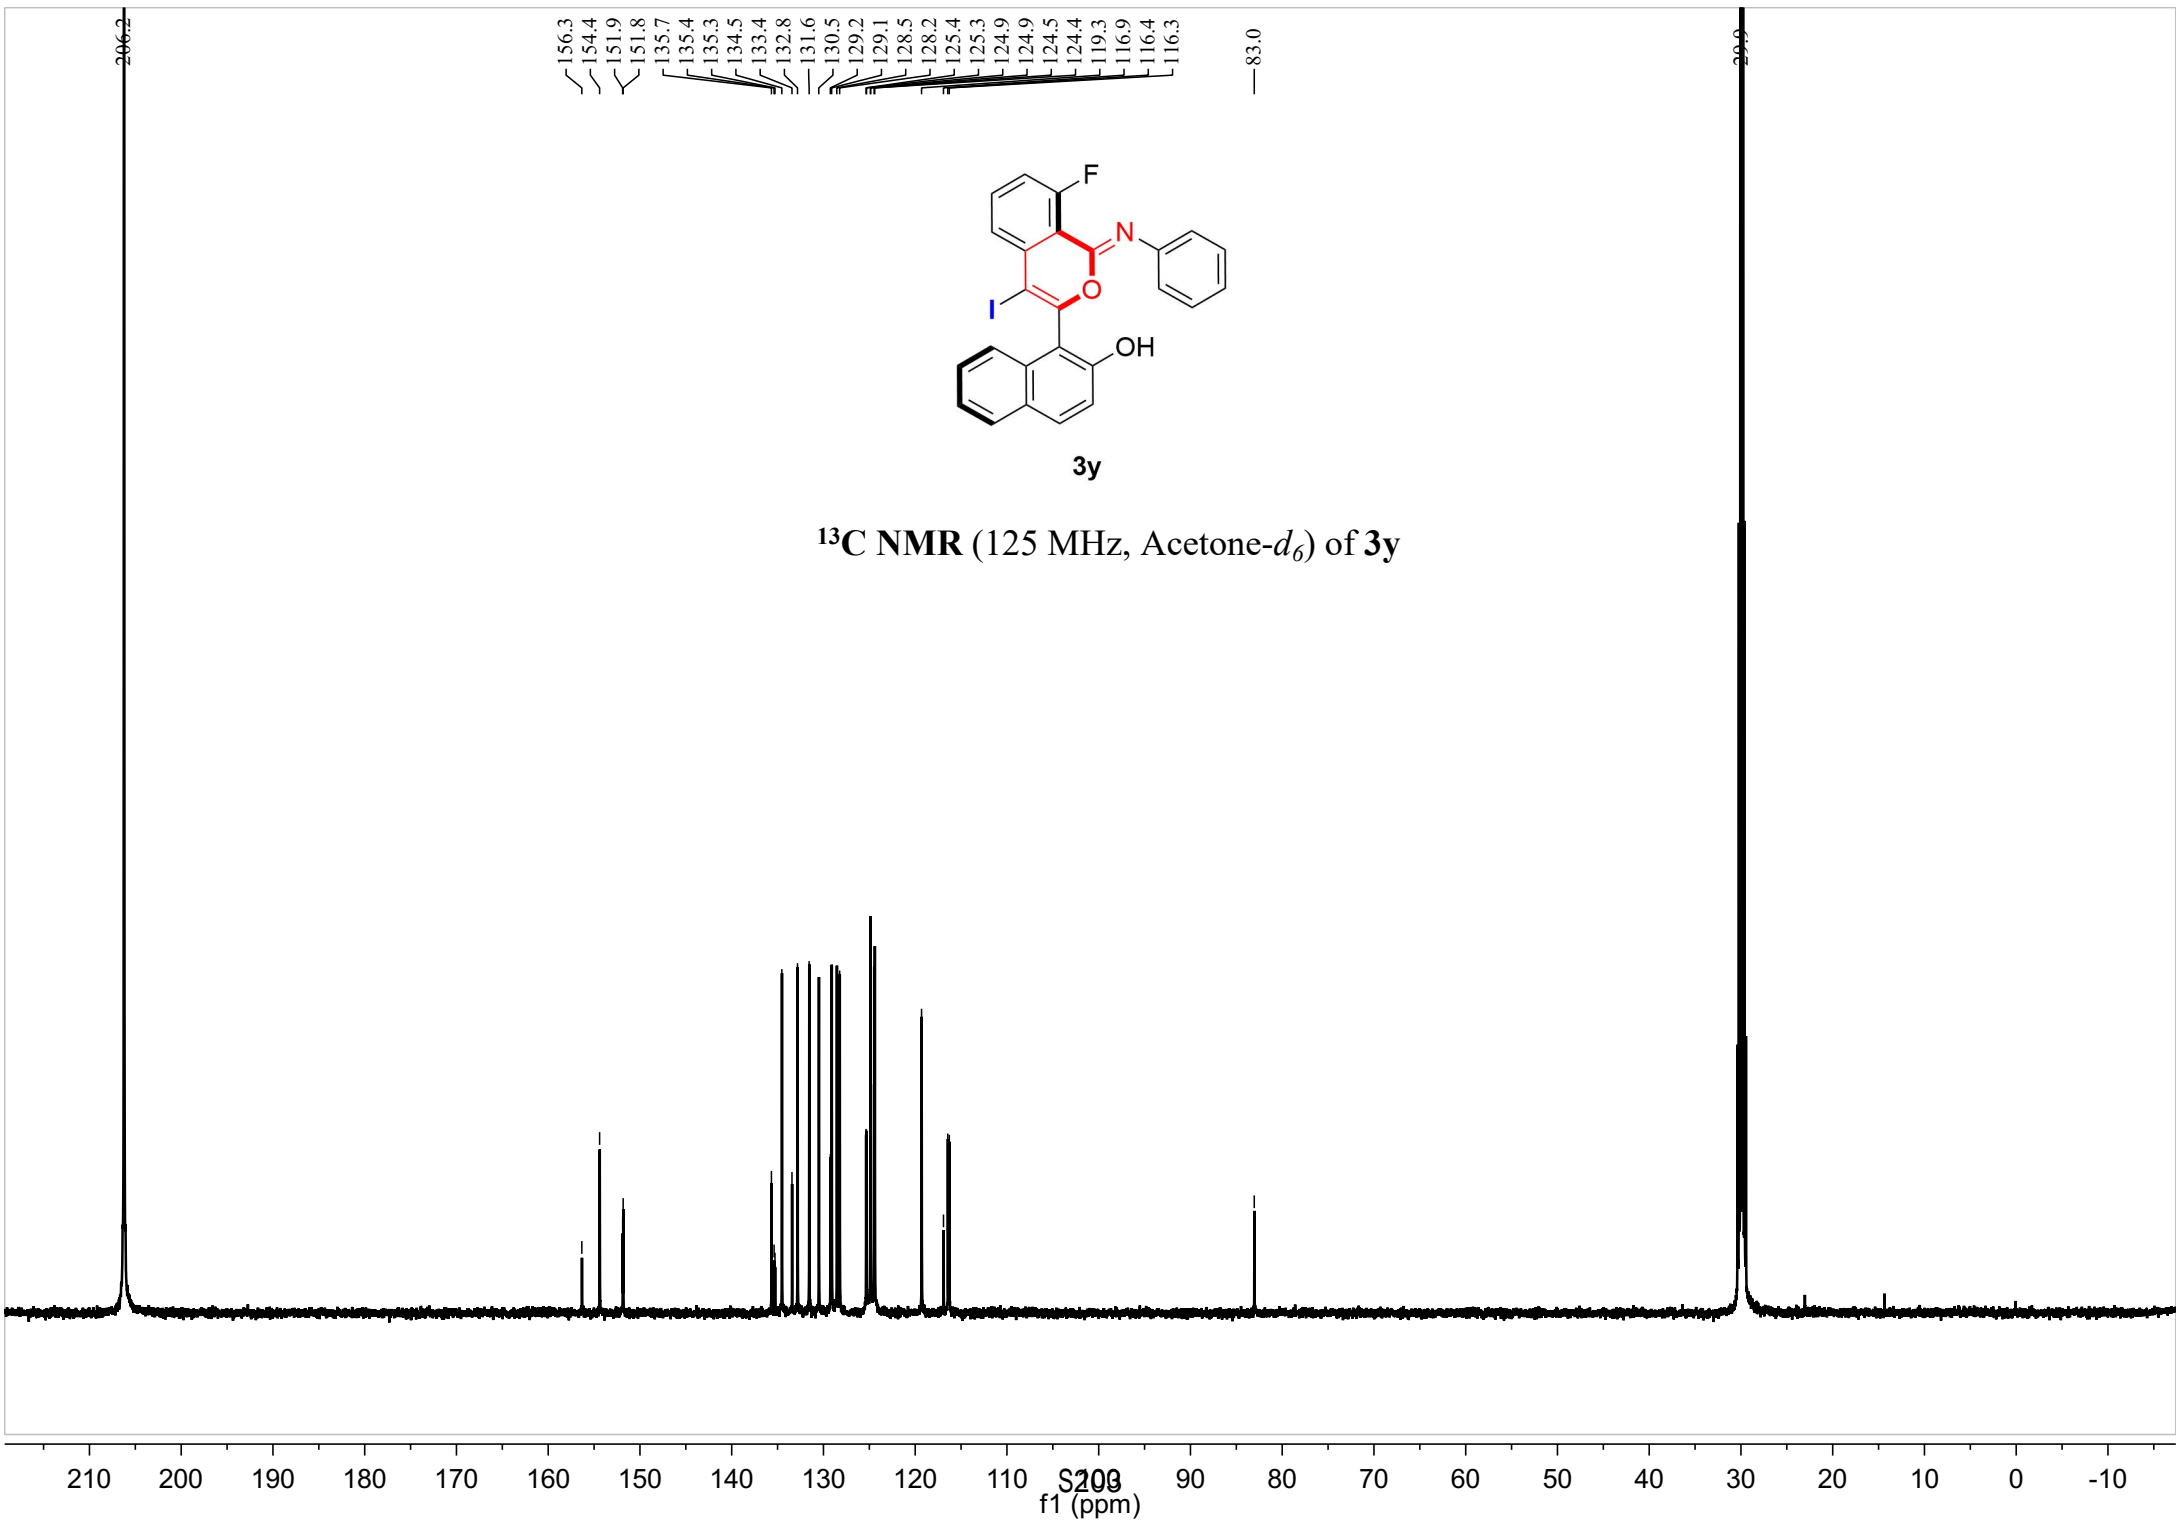

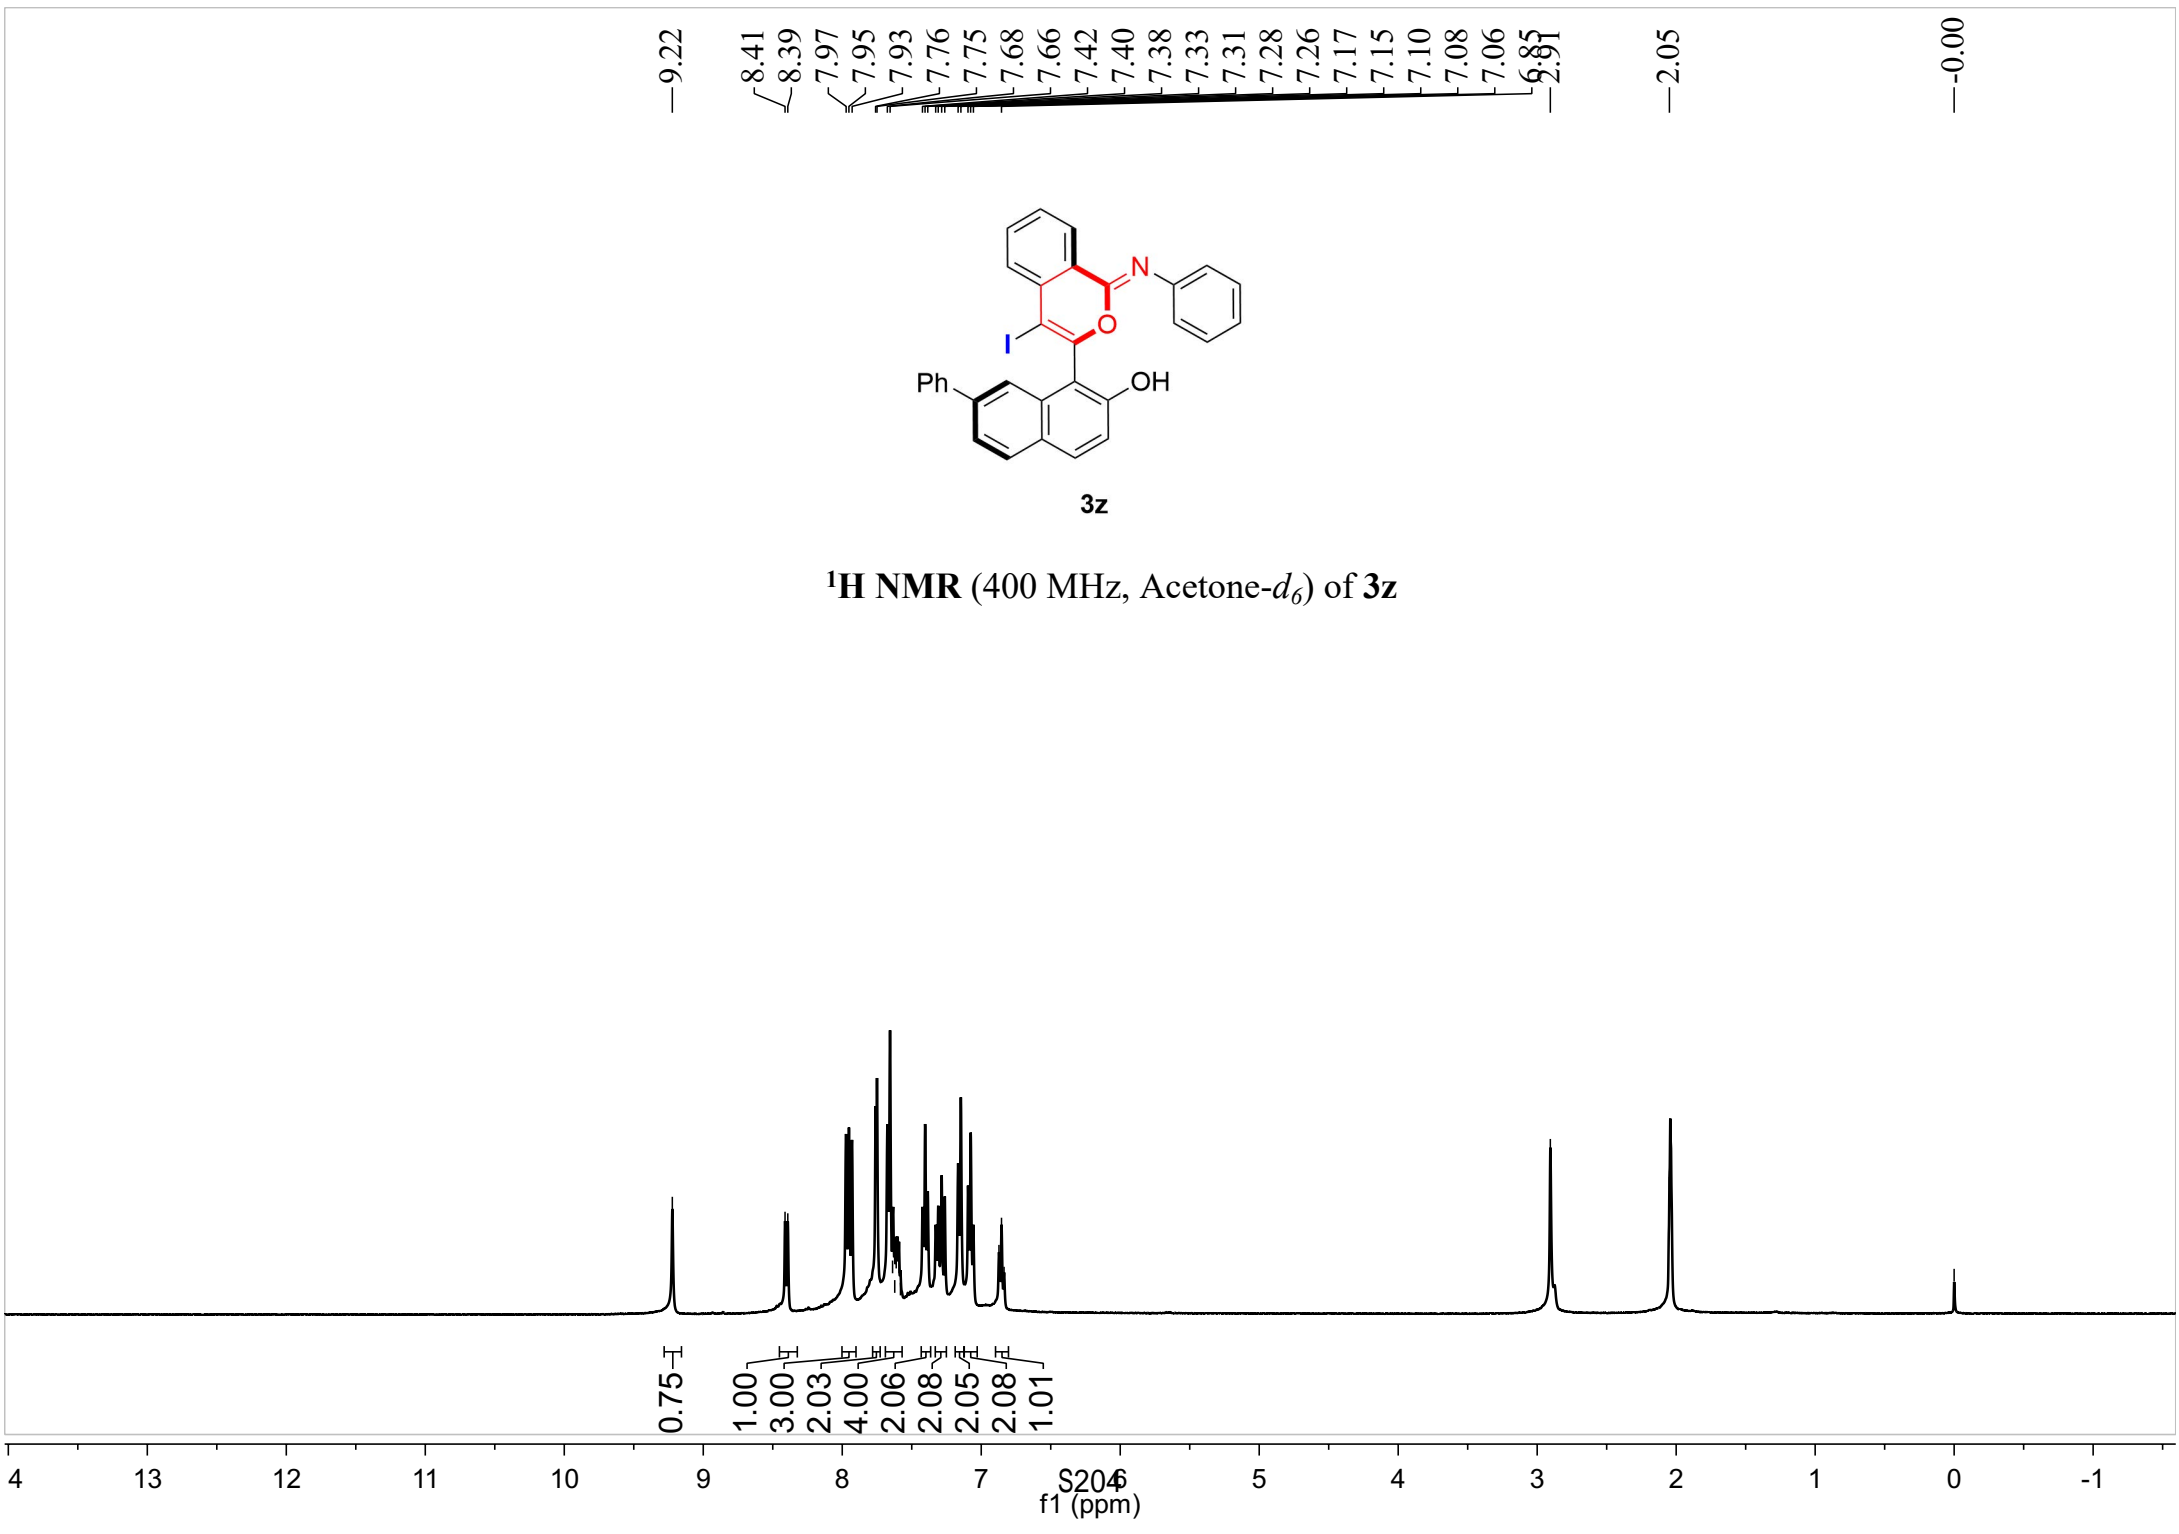

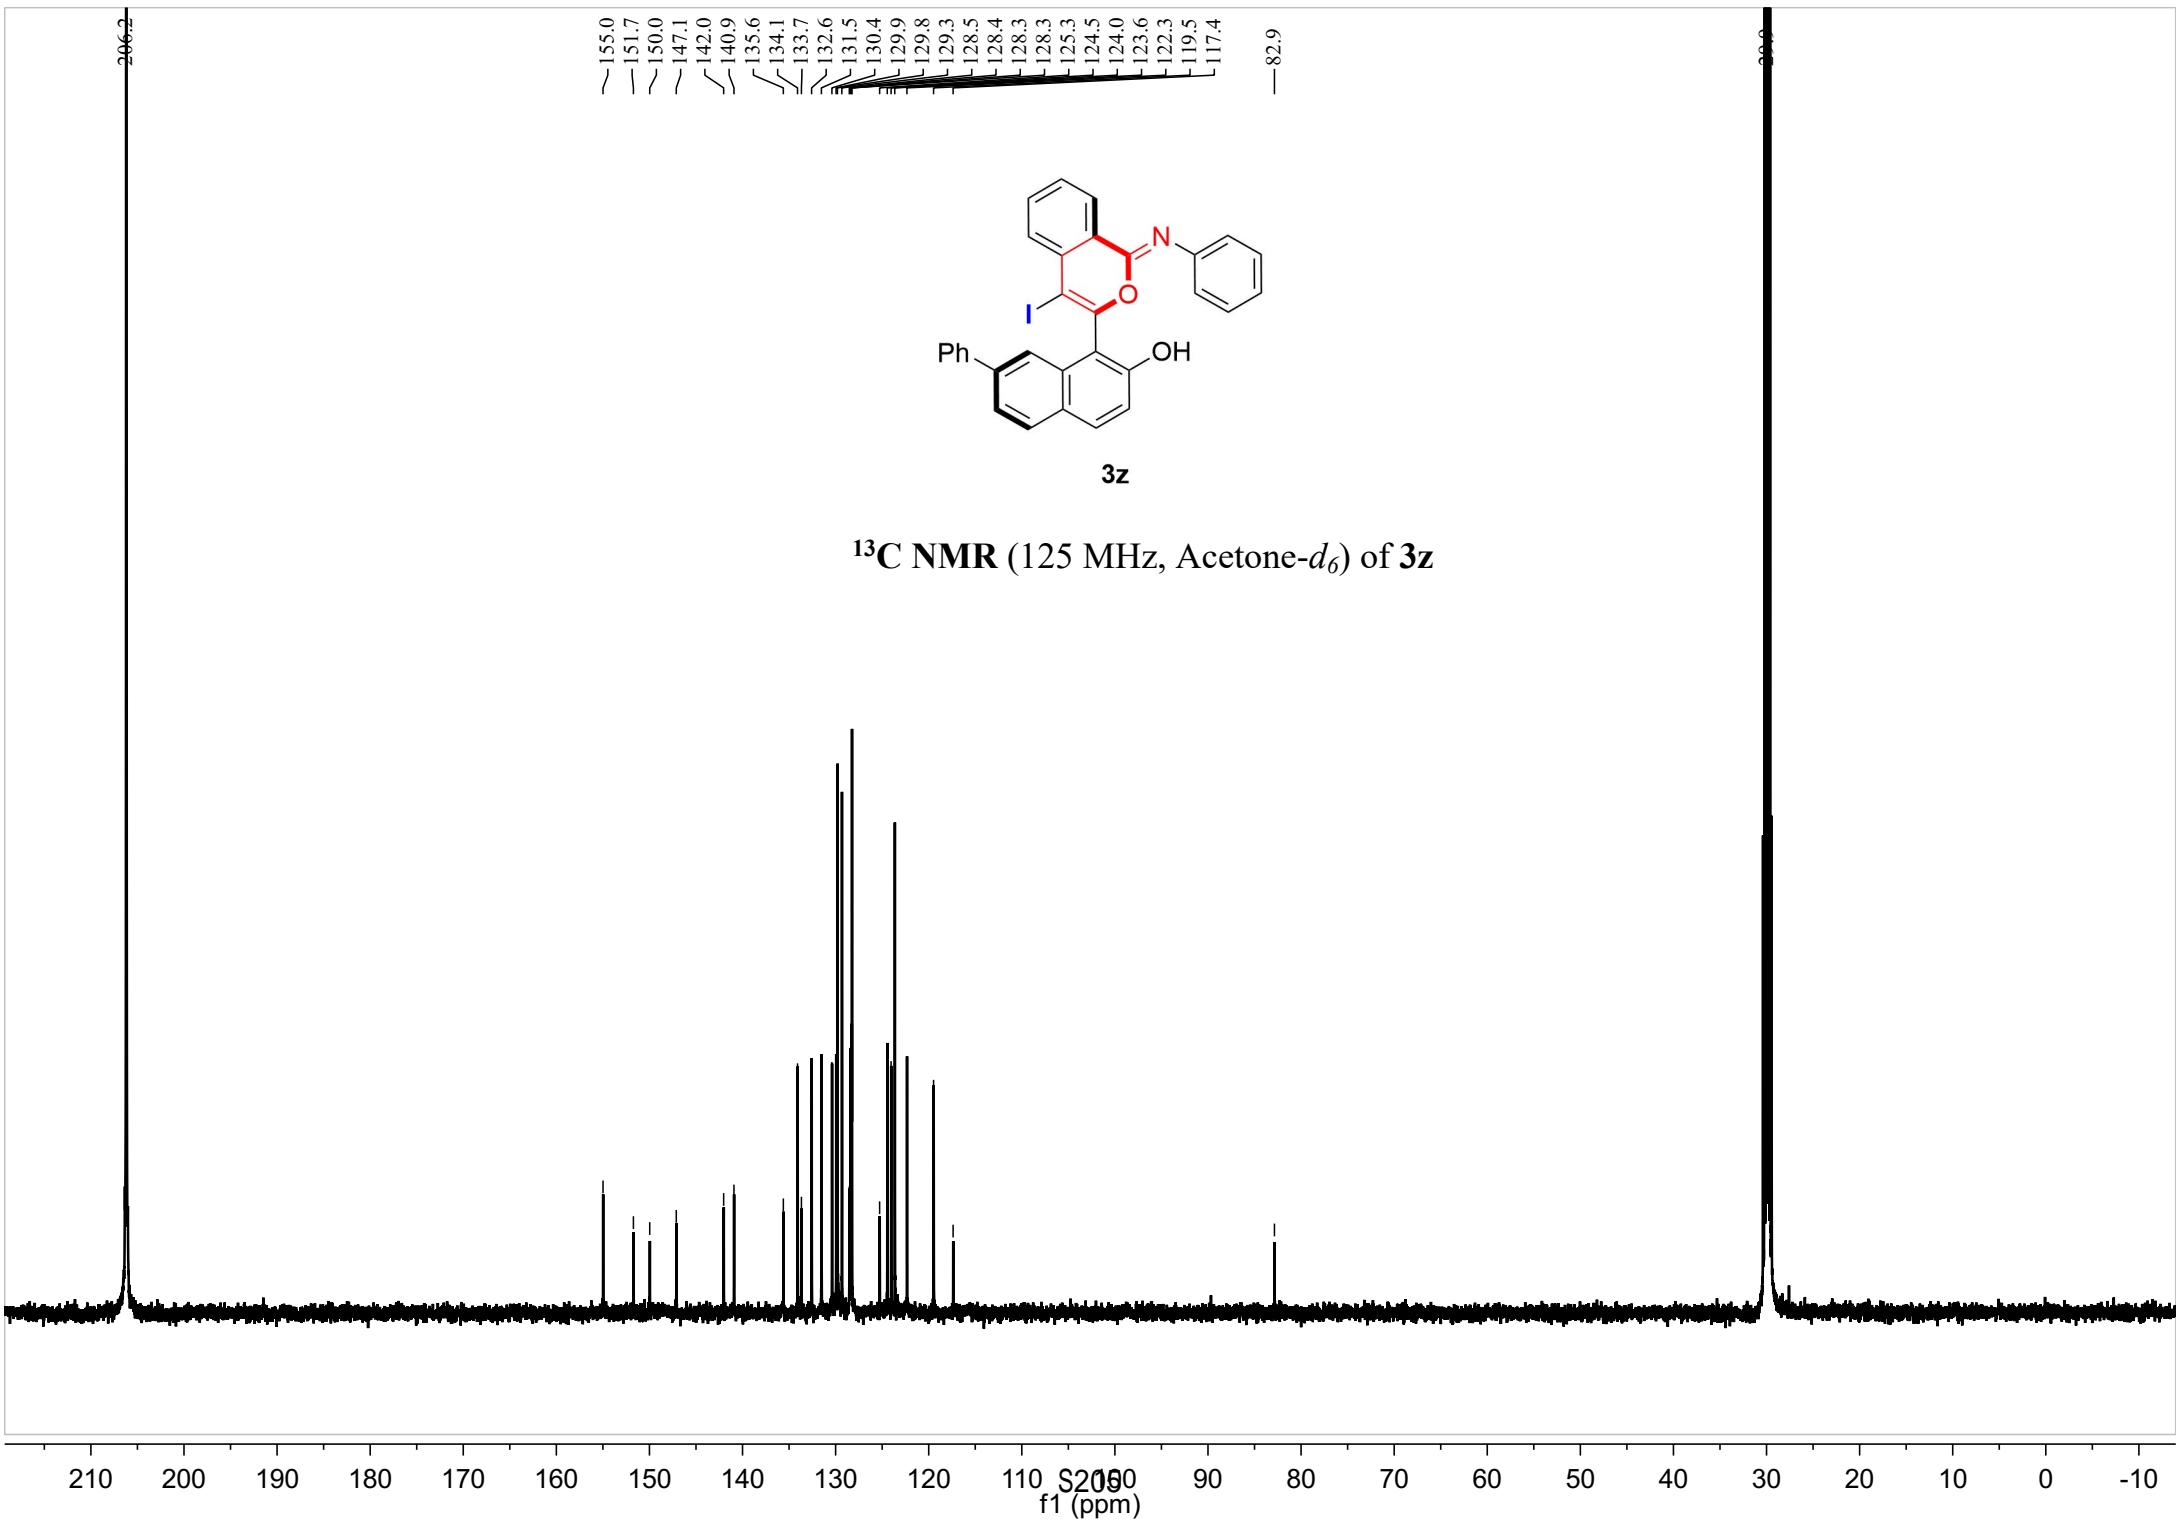

10.30  
8.36  
8.34  
8.15  
7.99  
7.97  
7.80  
7.77  
7.77  
7.75  
7.72  
7.70  
7.68  
7.64  
7.51  
7.49  
7.37  
7.27  
7.25  
7.13  
7.11  
7.10  
3.39  
3.33  
2.50  
0.00

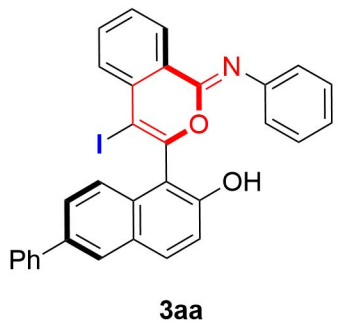

<sup>1</sup>H NMR (400 MHz, DMSO-d<sub>6</sub>) of **3aa**

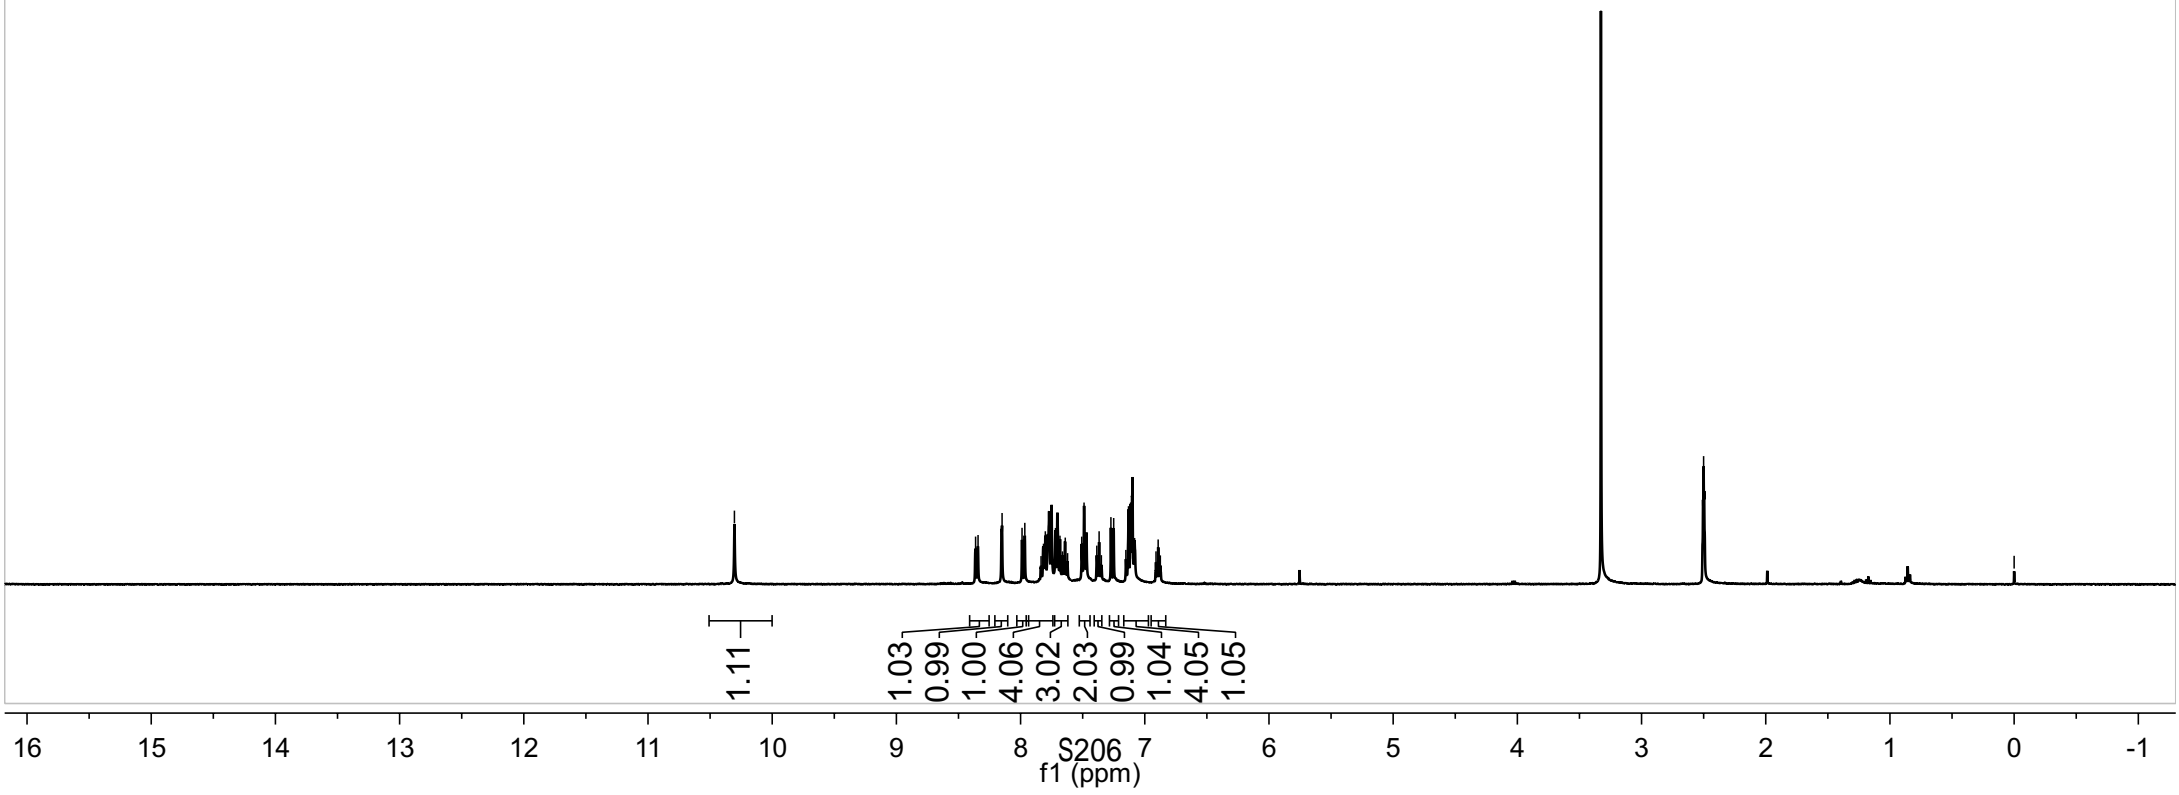

150.5  
149.1  
145.7  
139.9  
134.8  
134.3  
133.6  
132.0  
131.3  
130.2  
129.6  
129.0  
128.5  
127.7  
127.2  
127.0  
126.7  
126.4  
125.7  
124.0  
123.5  
123.4  
122.5  
119.0  
115.4  
82.3

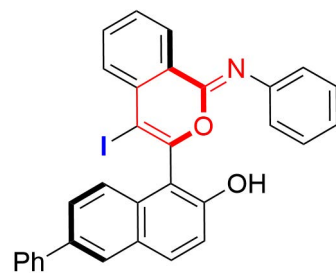

3aa

$^{13}\text{C}$  NMR (125 MHz,  $\text{DMSO-}d_6$ ) of 3aa

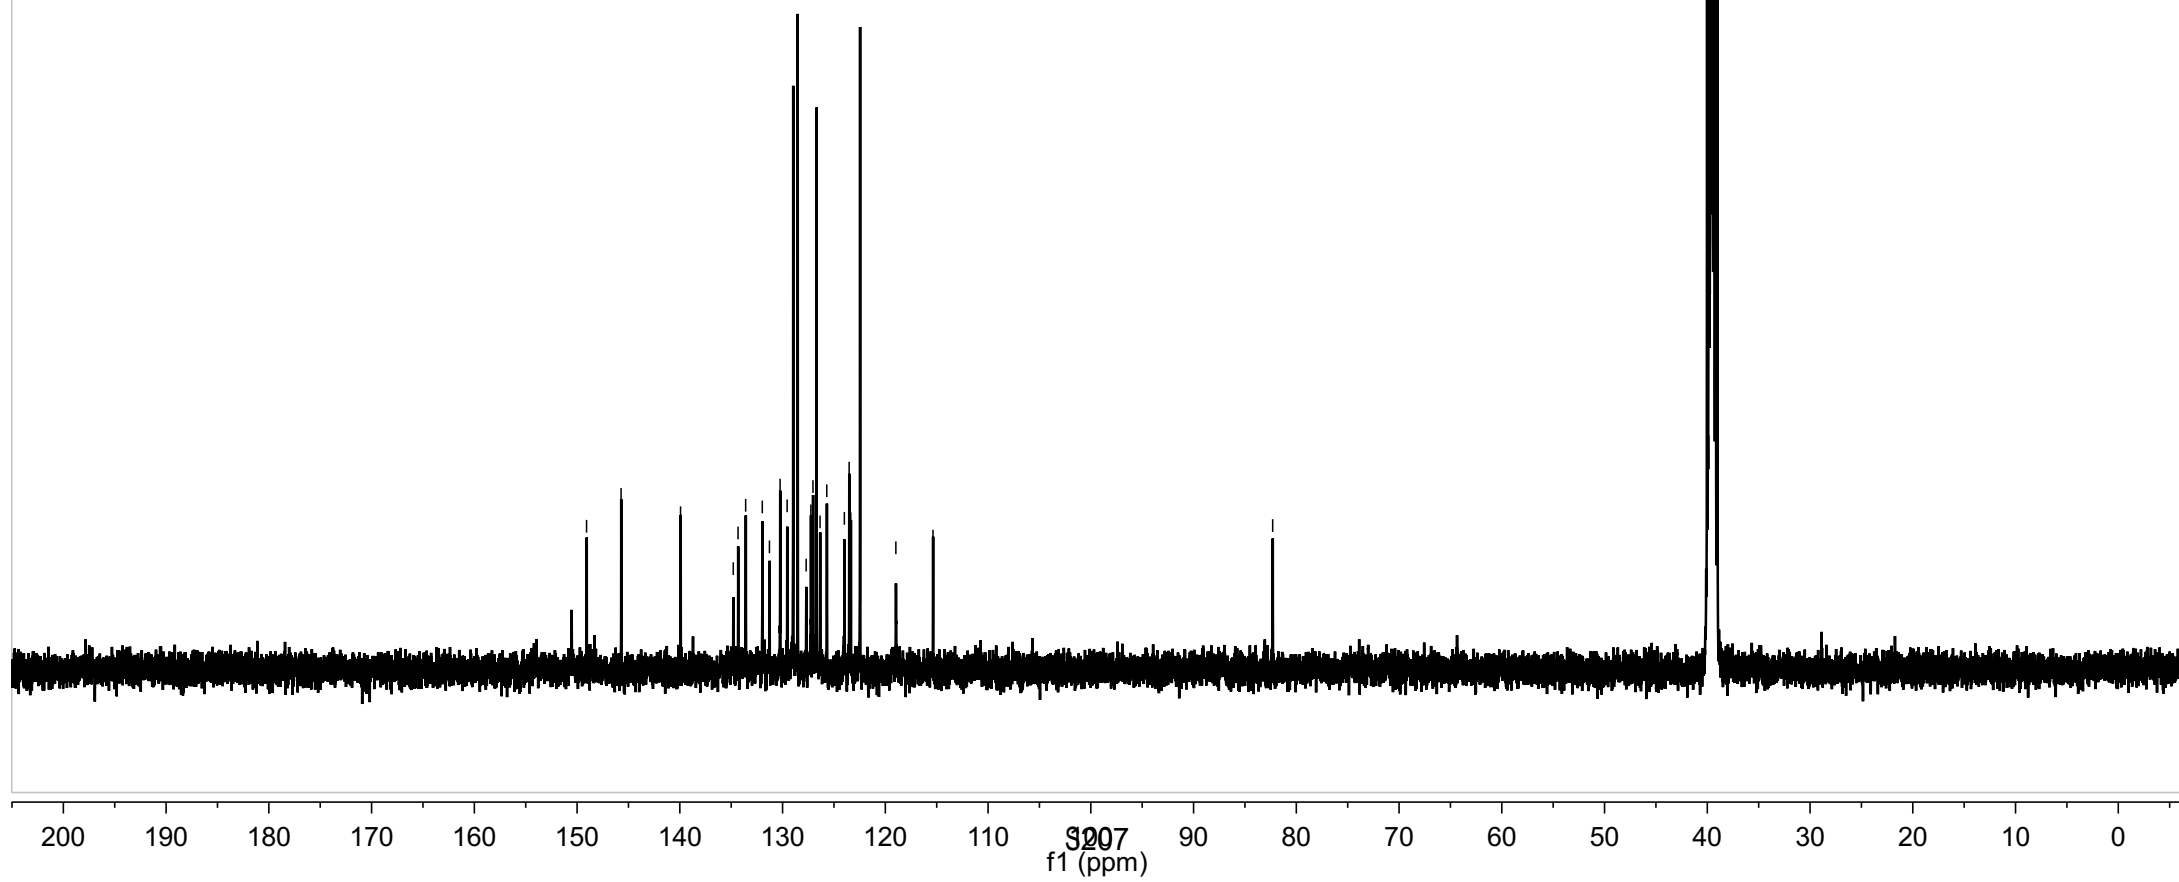

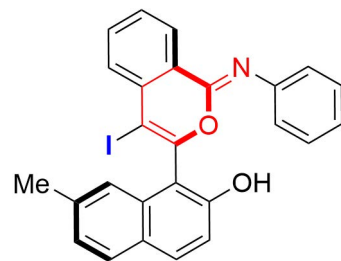

**3ab**

<sup>1</sup>H NMR (400 MHz, DMSO-*d*<sub>6</sub>) of **3ab**

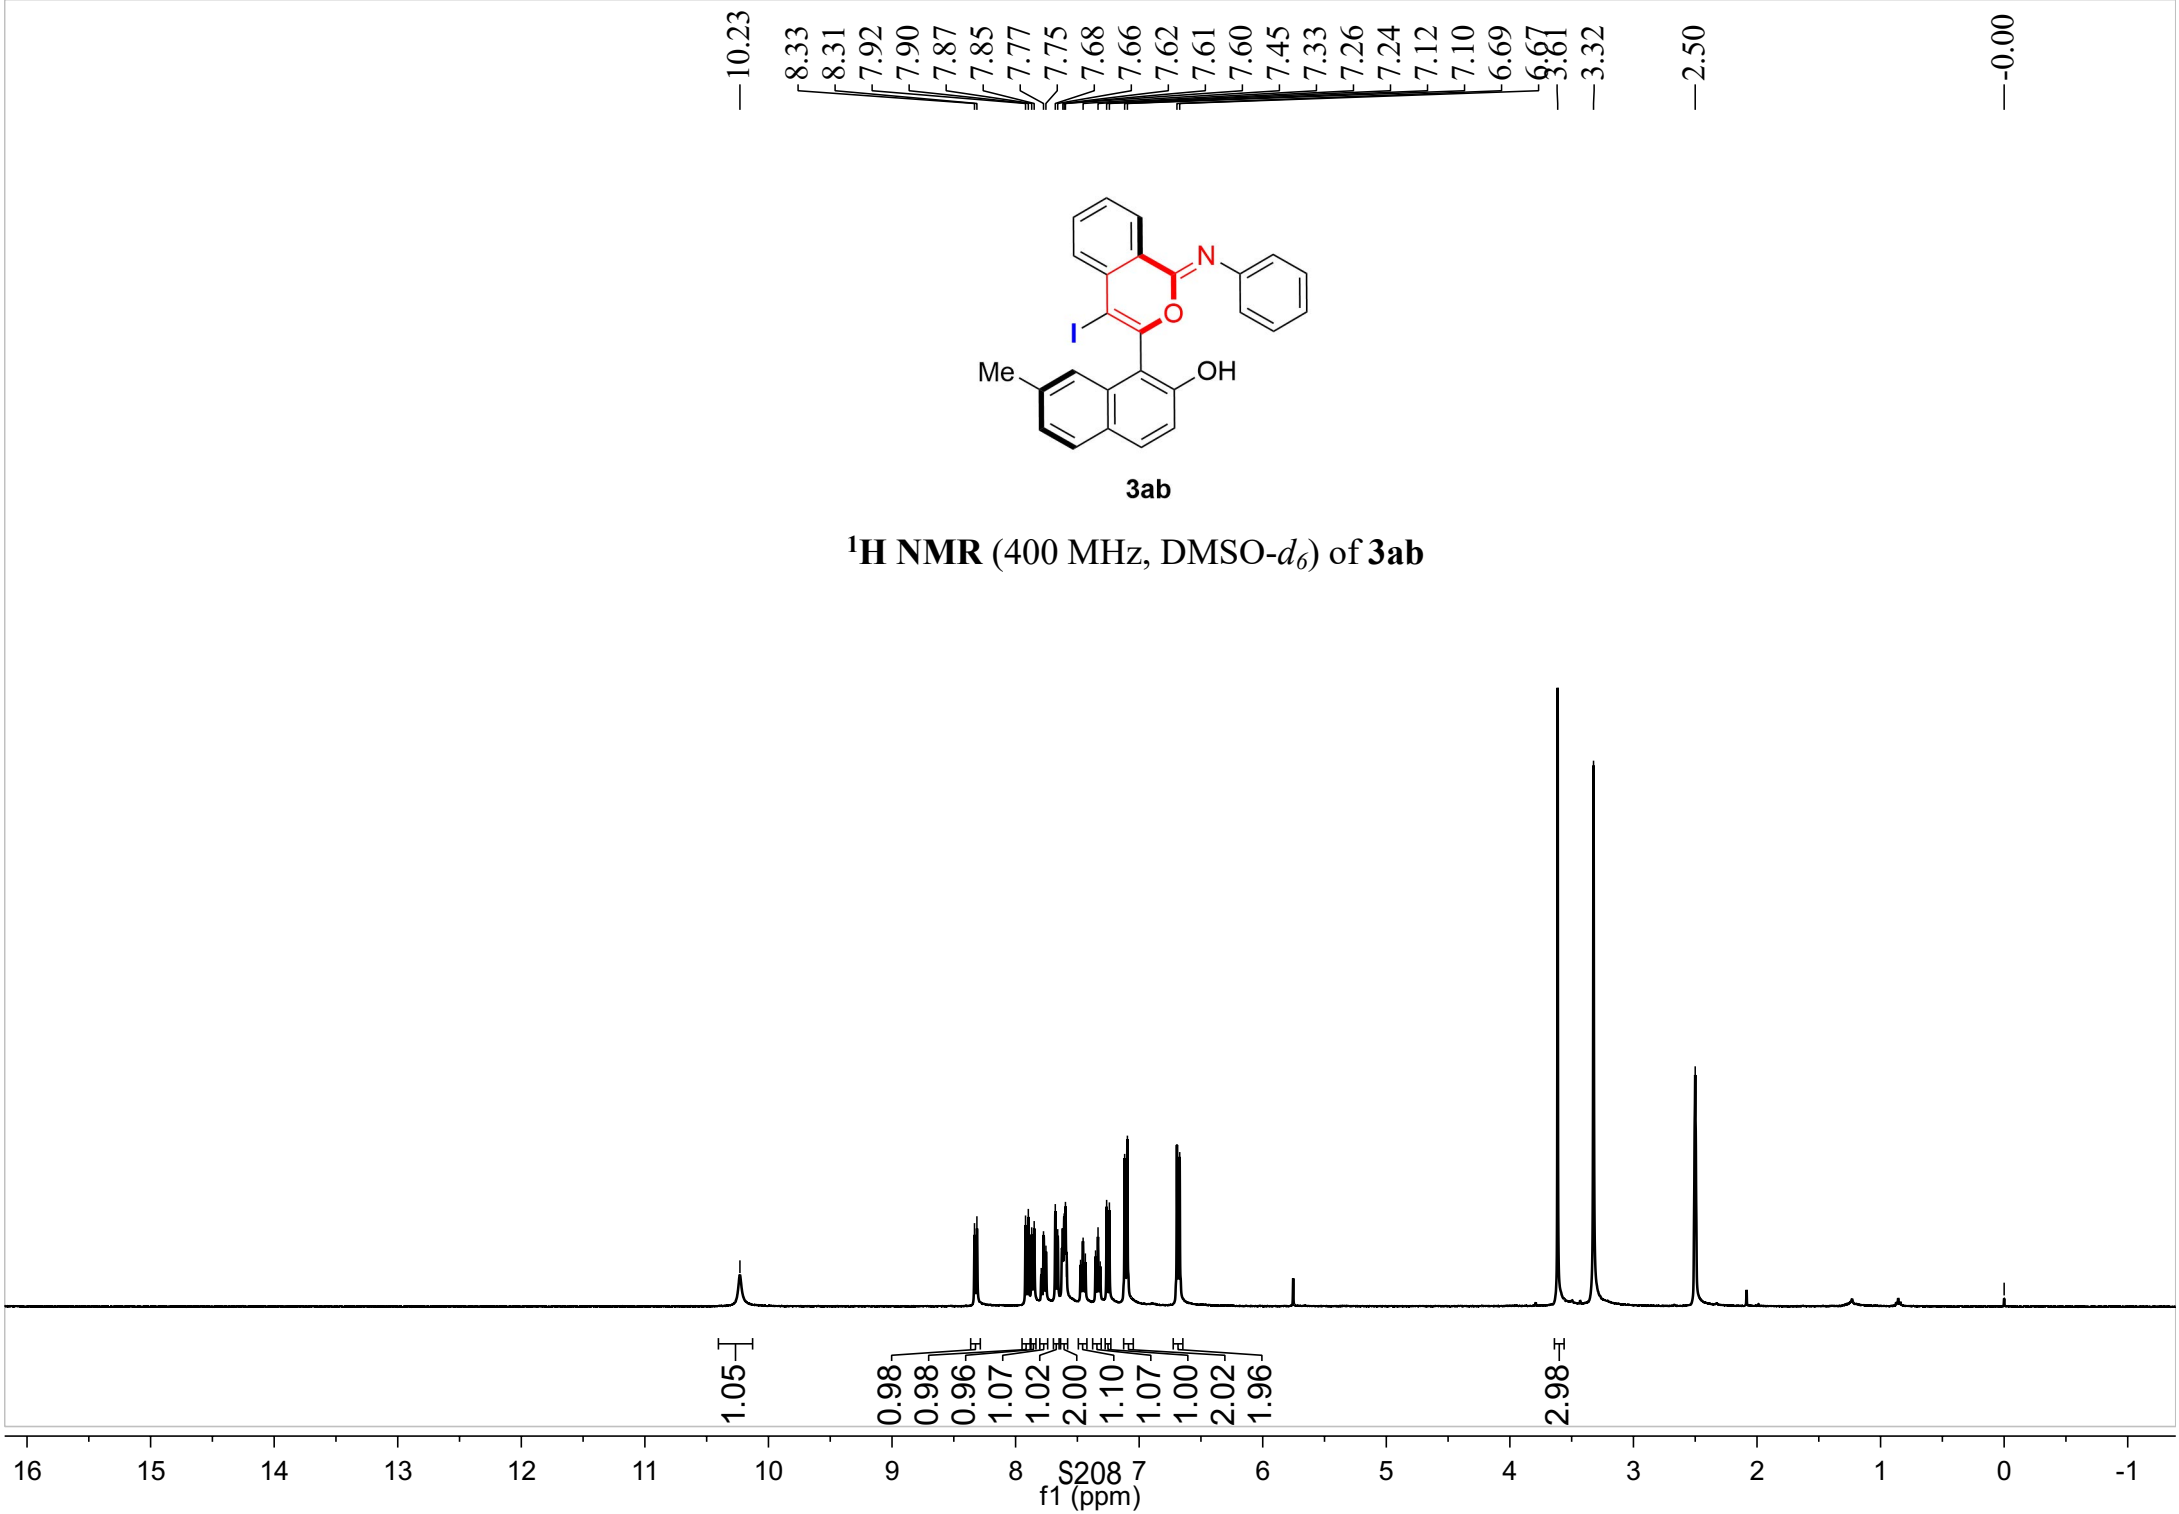



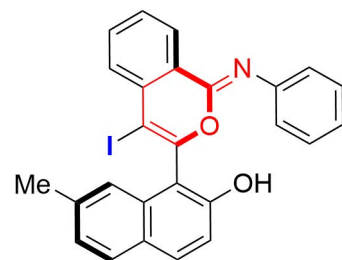

**3ab**

$^{13}\text{C}$  NMR (100 MHz, DMSO- $d_6$ ) of **3ab**

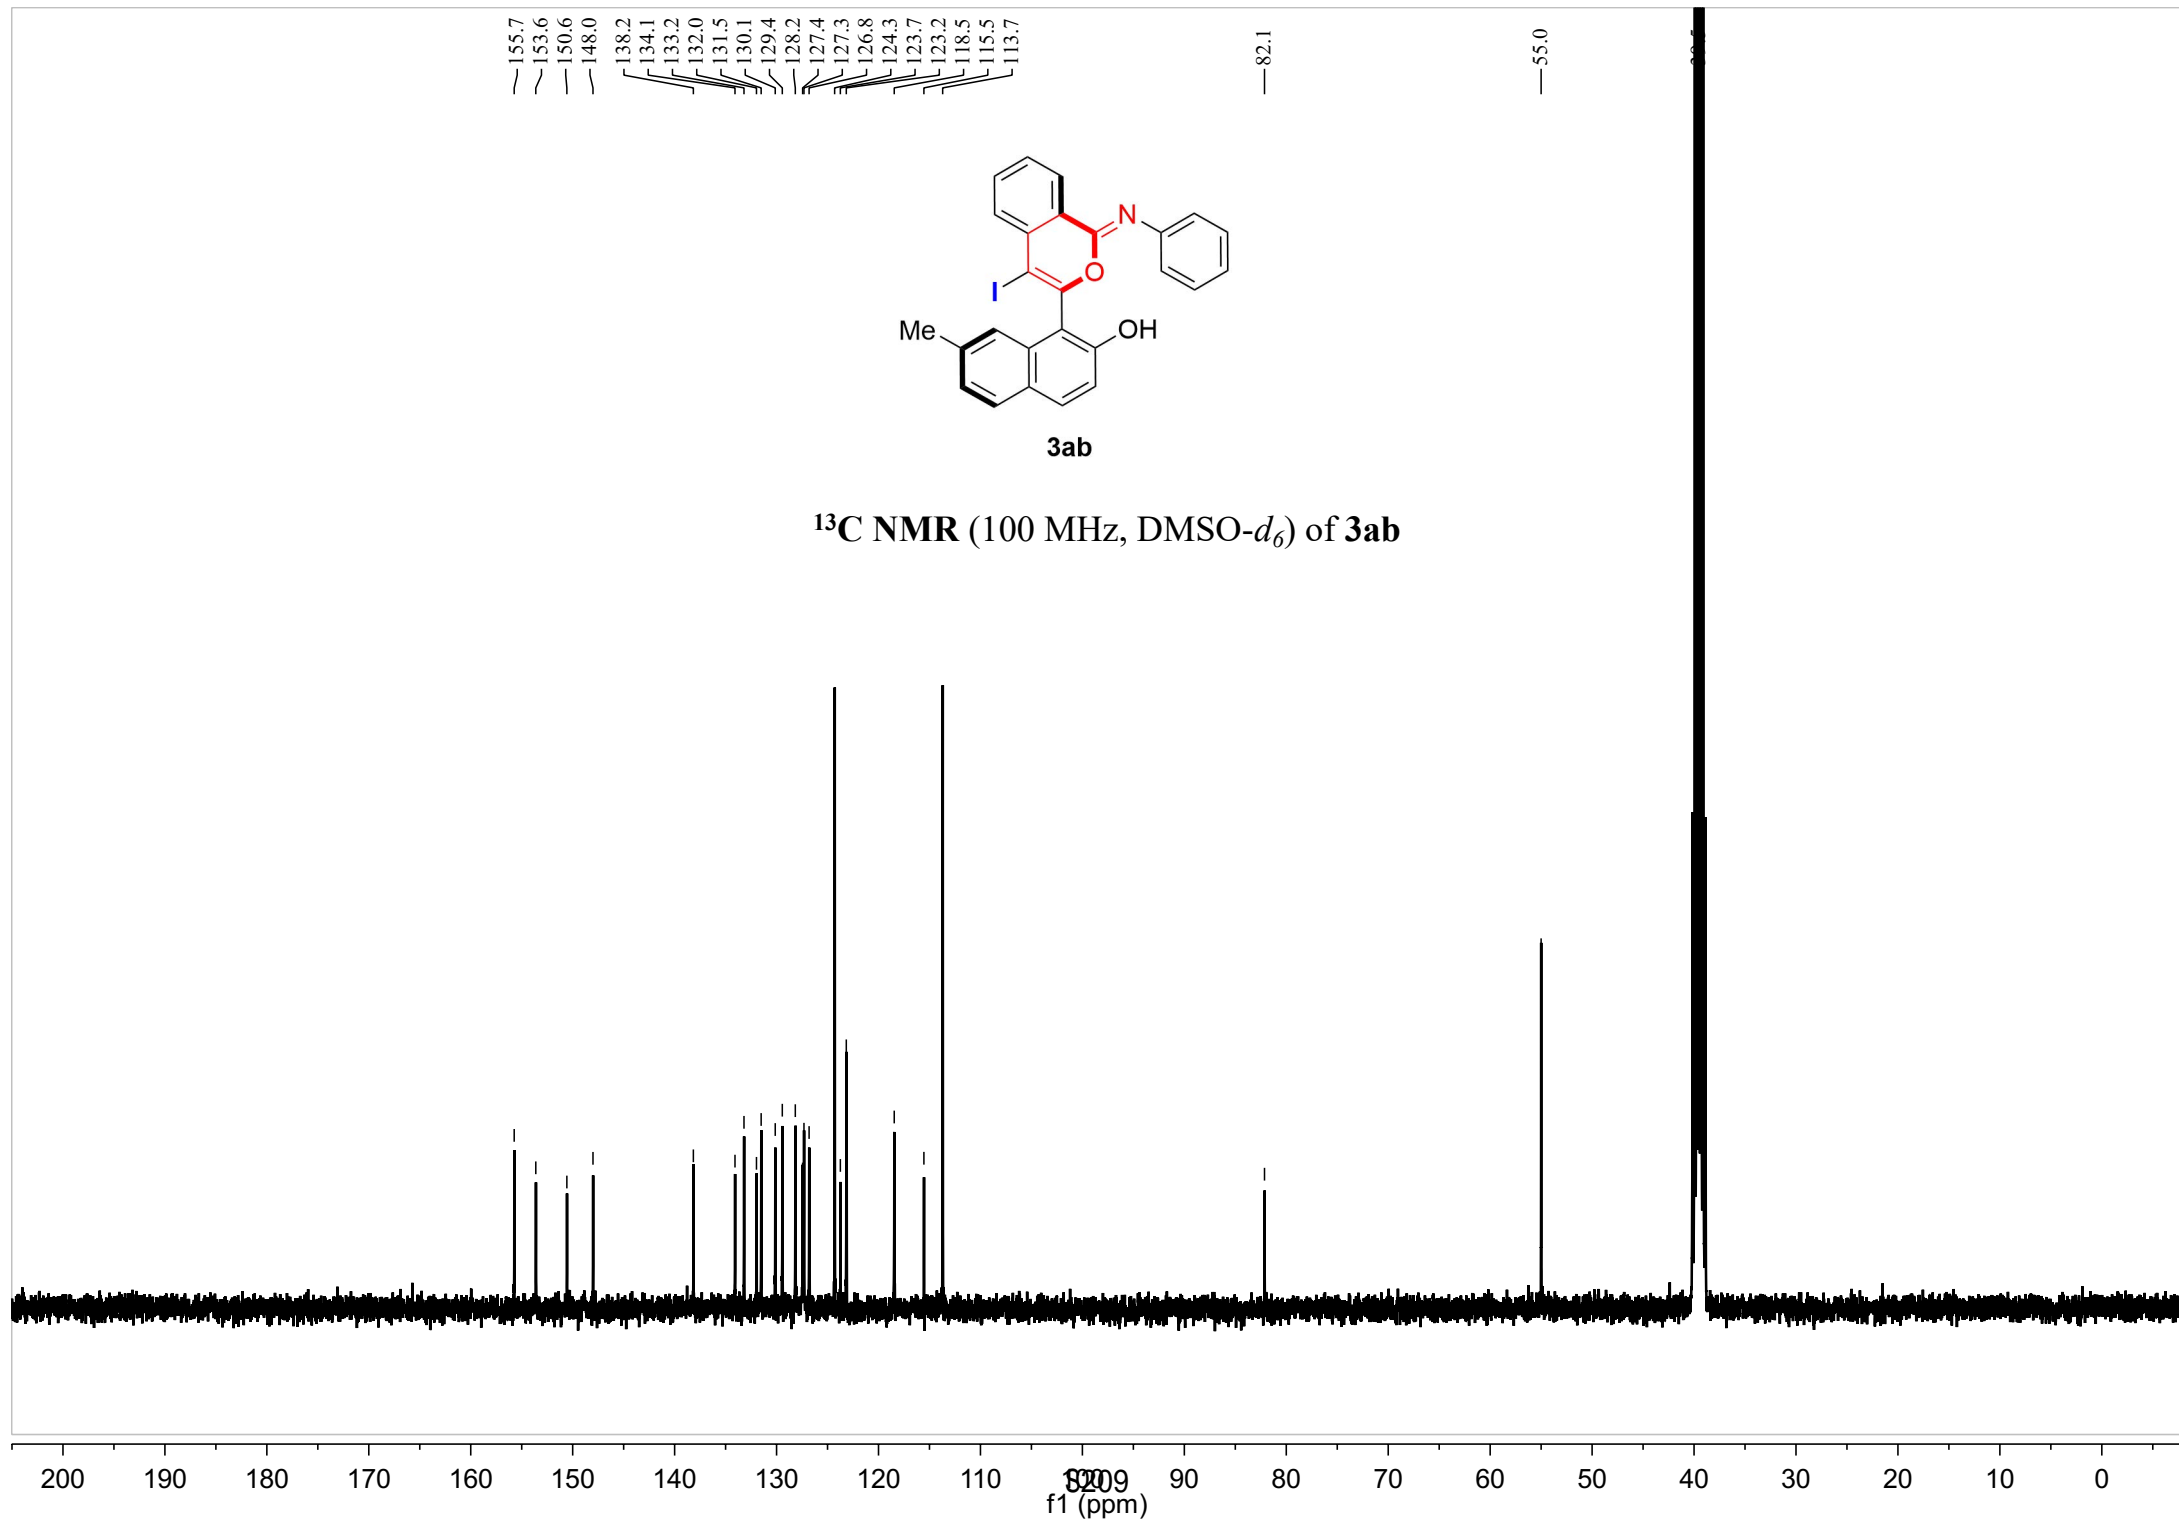

8.30  
8.28  
7.99  
7.98  
7.97  
7.96  
7.91  
7.89  
7.87  
7.74  
7.72  
7.70  
7.67  
7.50  
7.48  
7.46  
7.40  
7.38  
7.36  
7.33  
3.01  
-2.05  
-0.00

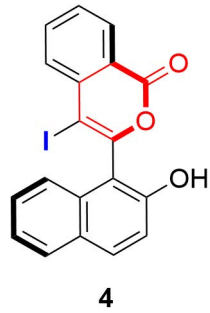

<sup>1</sup>H NMR (400 MHz, Acetone-*d*<sub>6</sub>) of 4

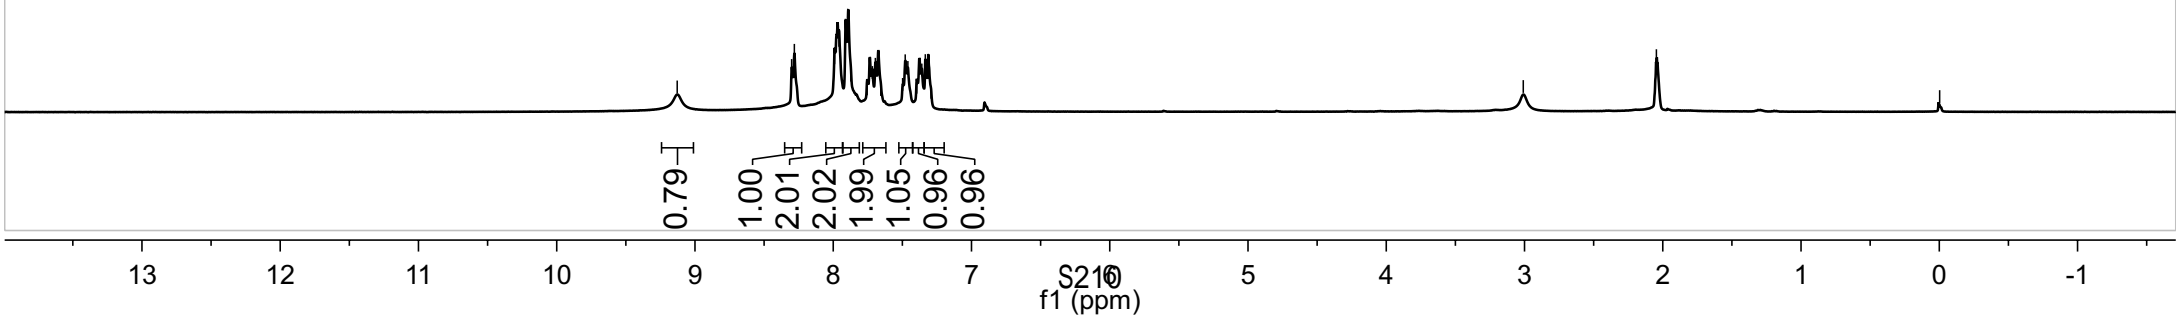

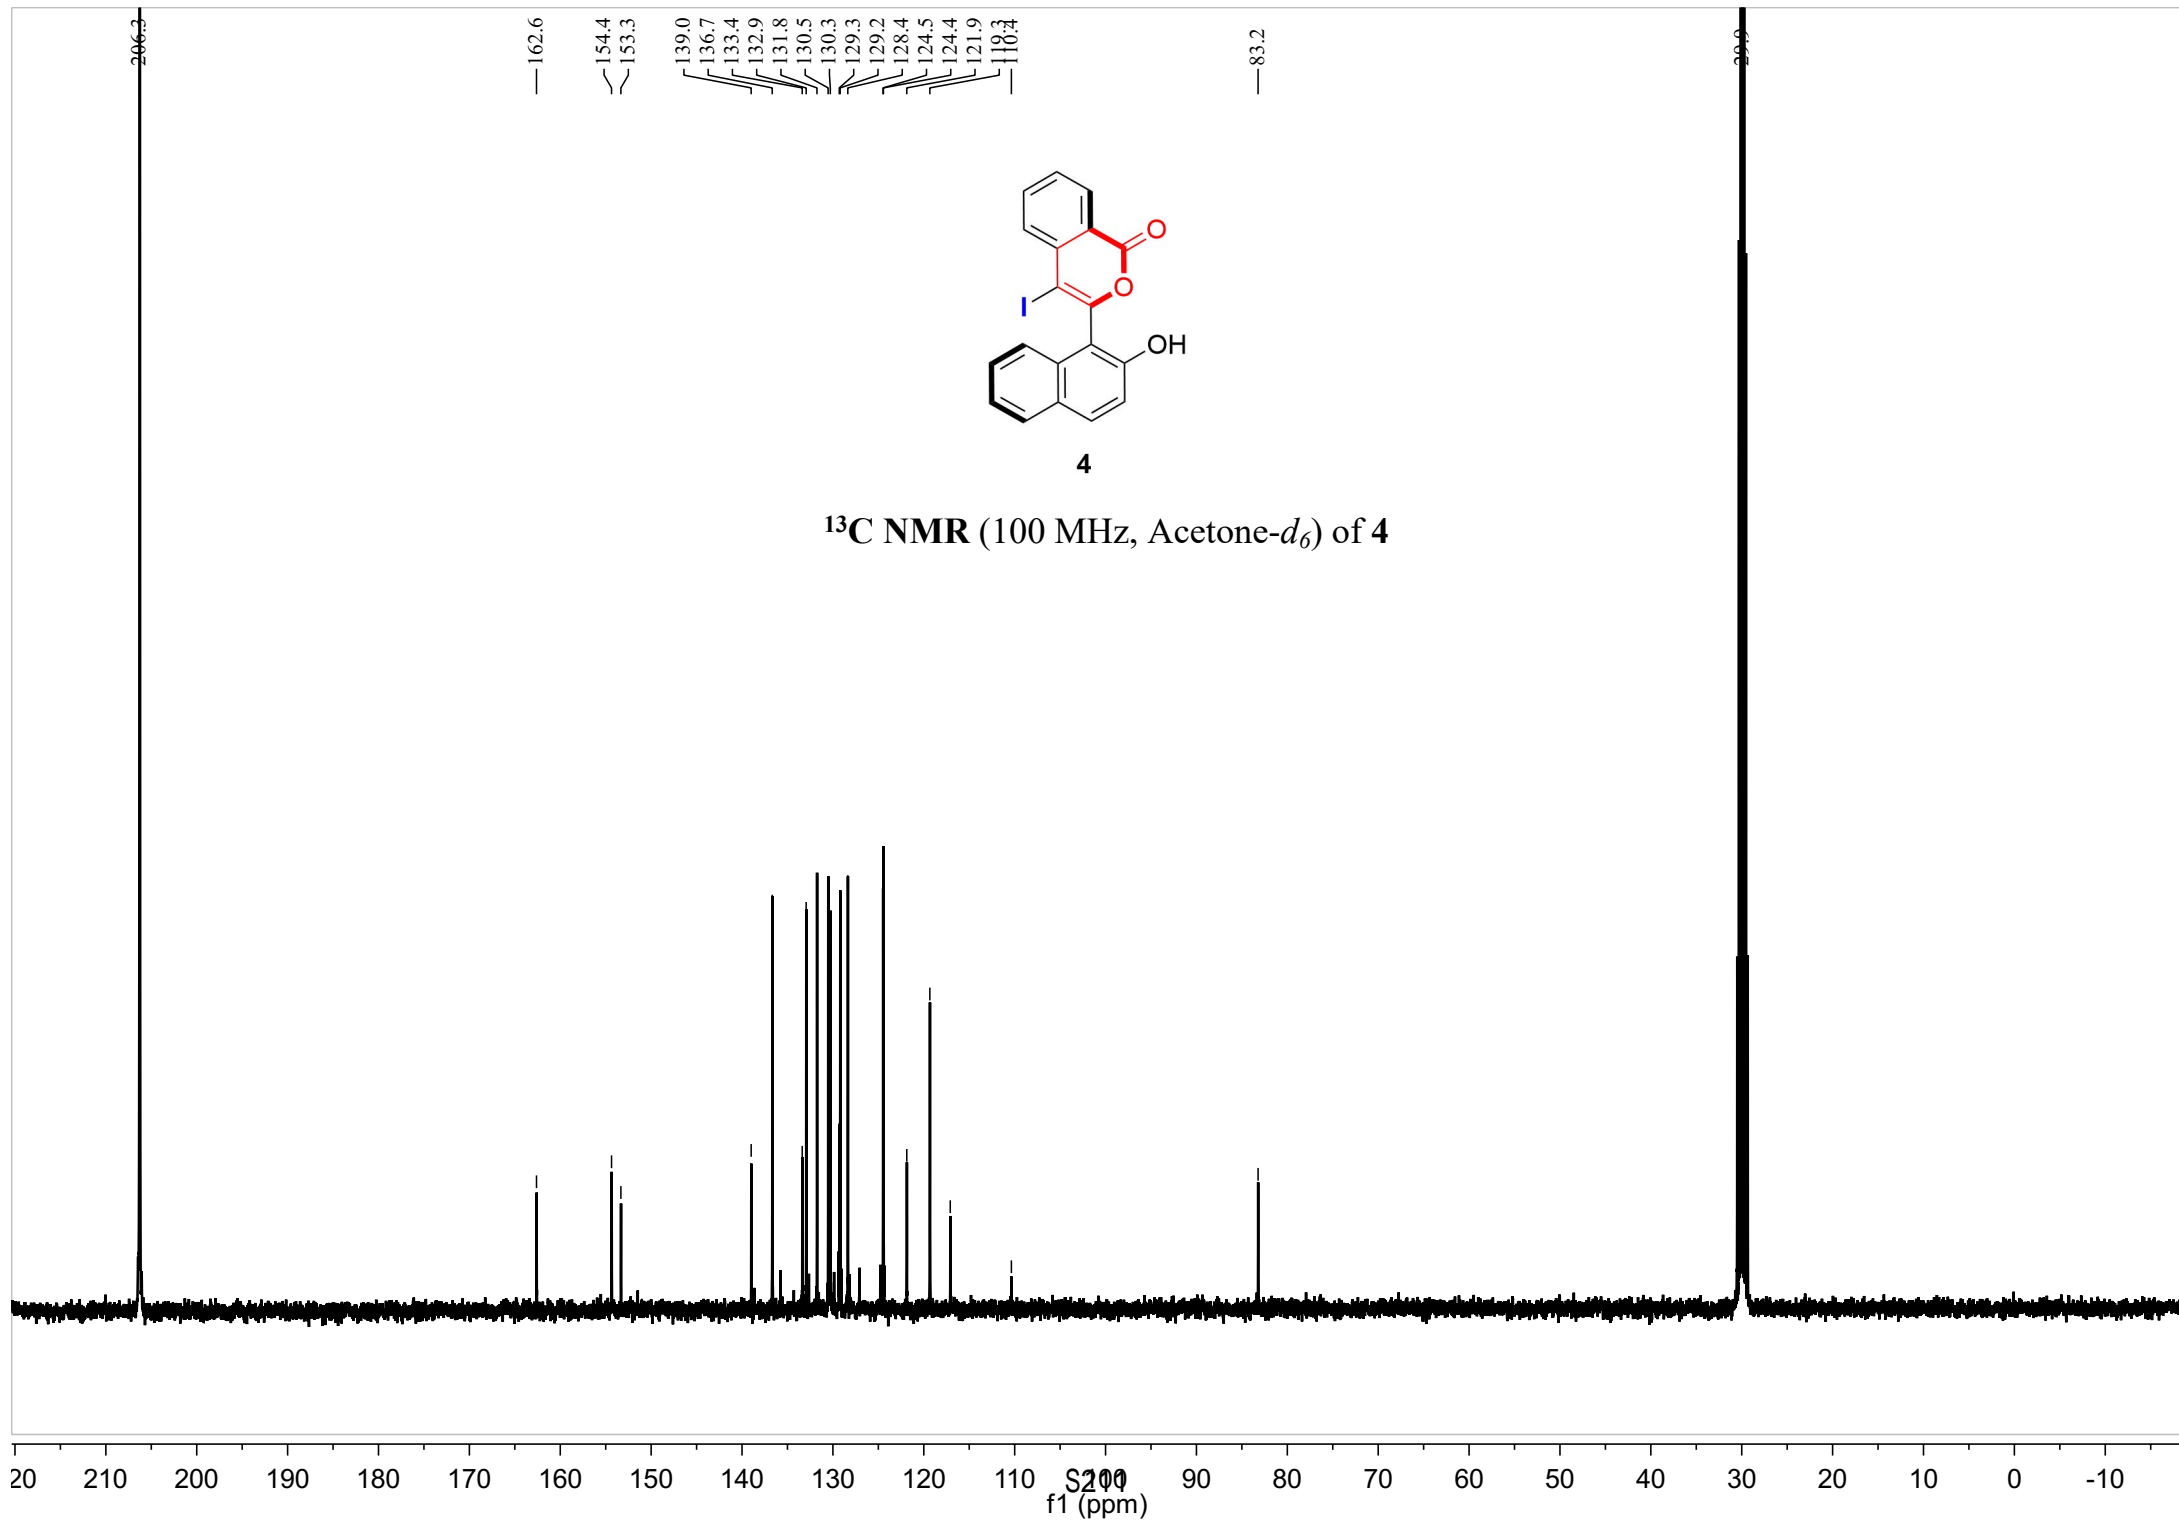

9.16  
9.15  
8.47  
8.45  
7.92  
7.90  
7.83  
7.82  
7.66  
7.64  
7.50  
7.49  
7.47  
7.35  
7.28  
7.26  
7.18  
7.16  
7.11  
7.09  
6.89  
6.88  
6.83

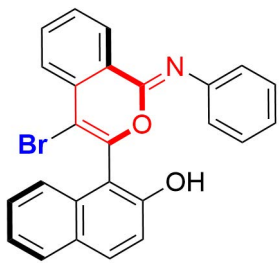

5a

<sup>1</sup>H NMR (400 MHz, Acetone-d<sub>6</sub>) of 5a

0.86  
0.94  
0.93  
3.96  
1.07  
1.08  
1.12  
0.97  
1.93  
2.09  
1.01

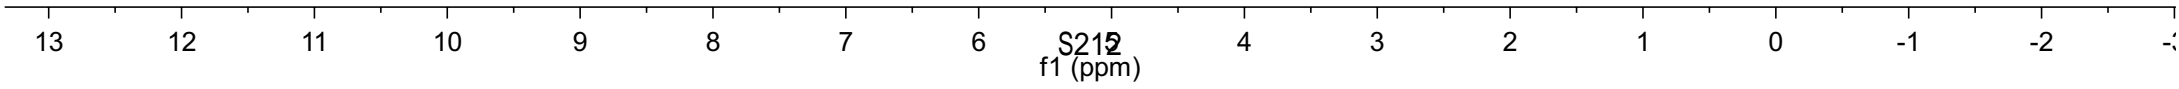

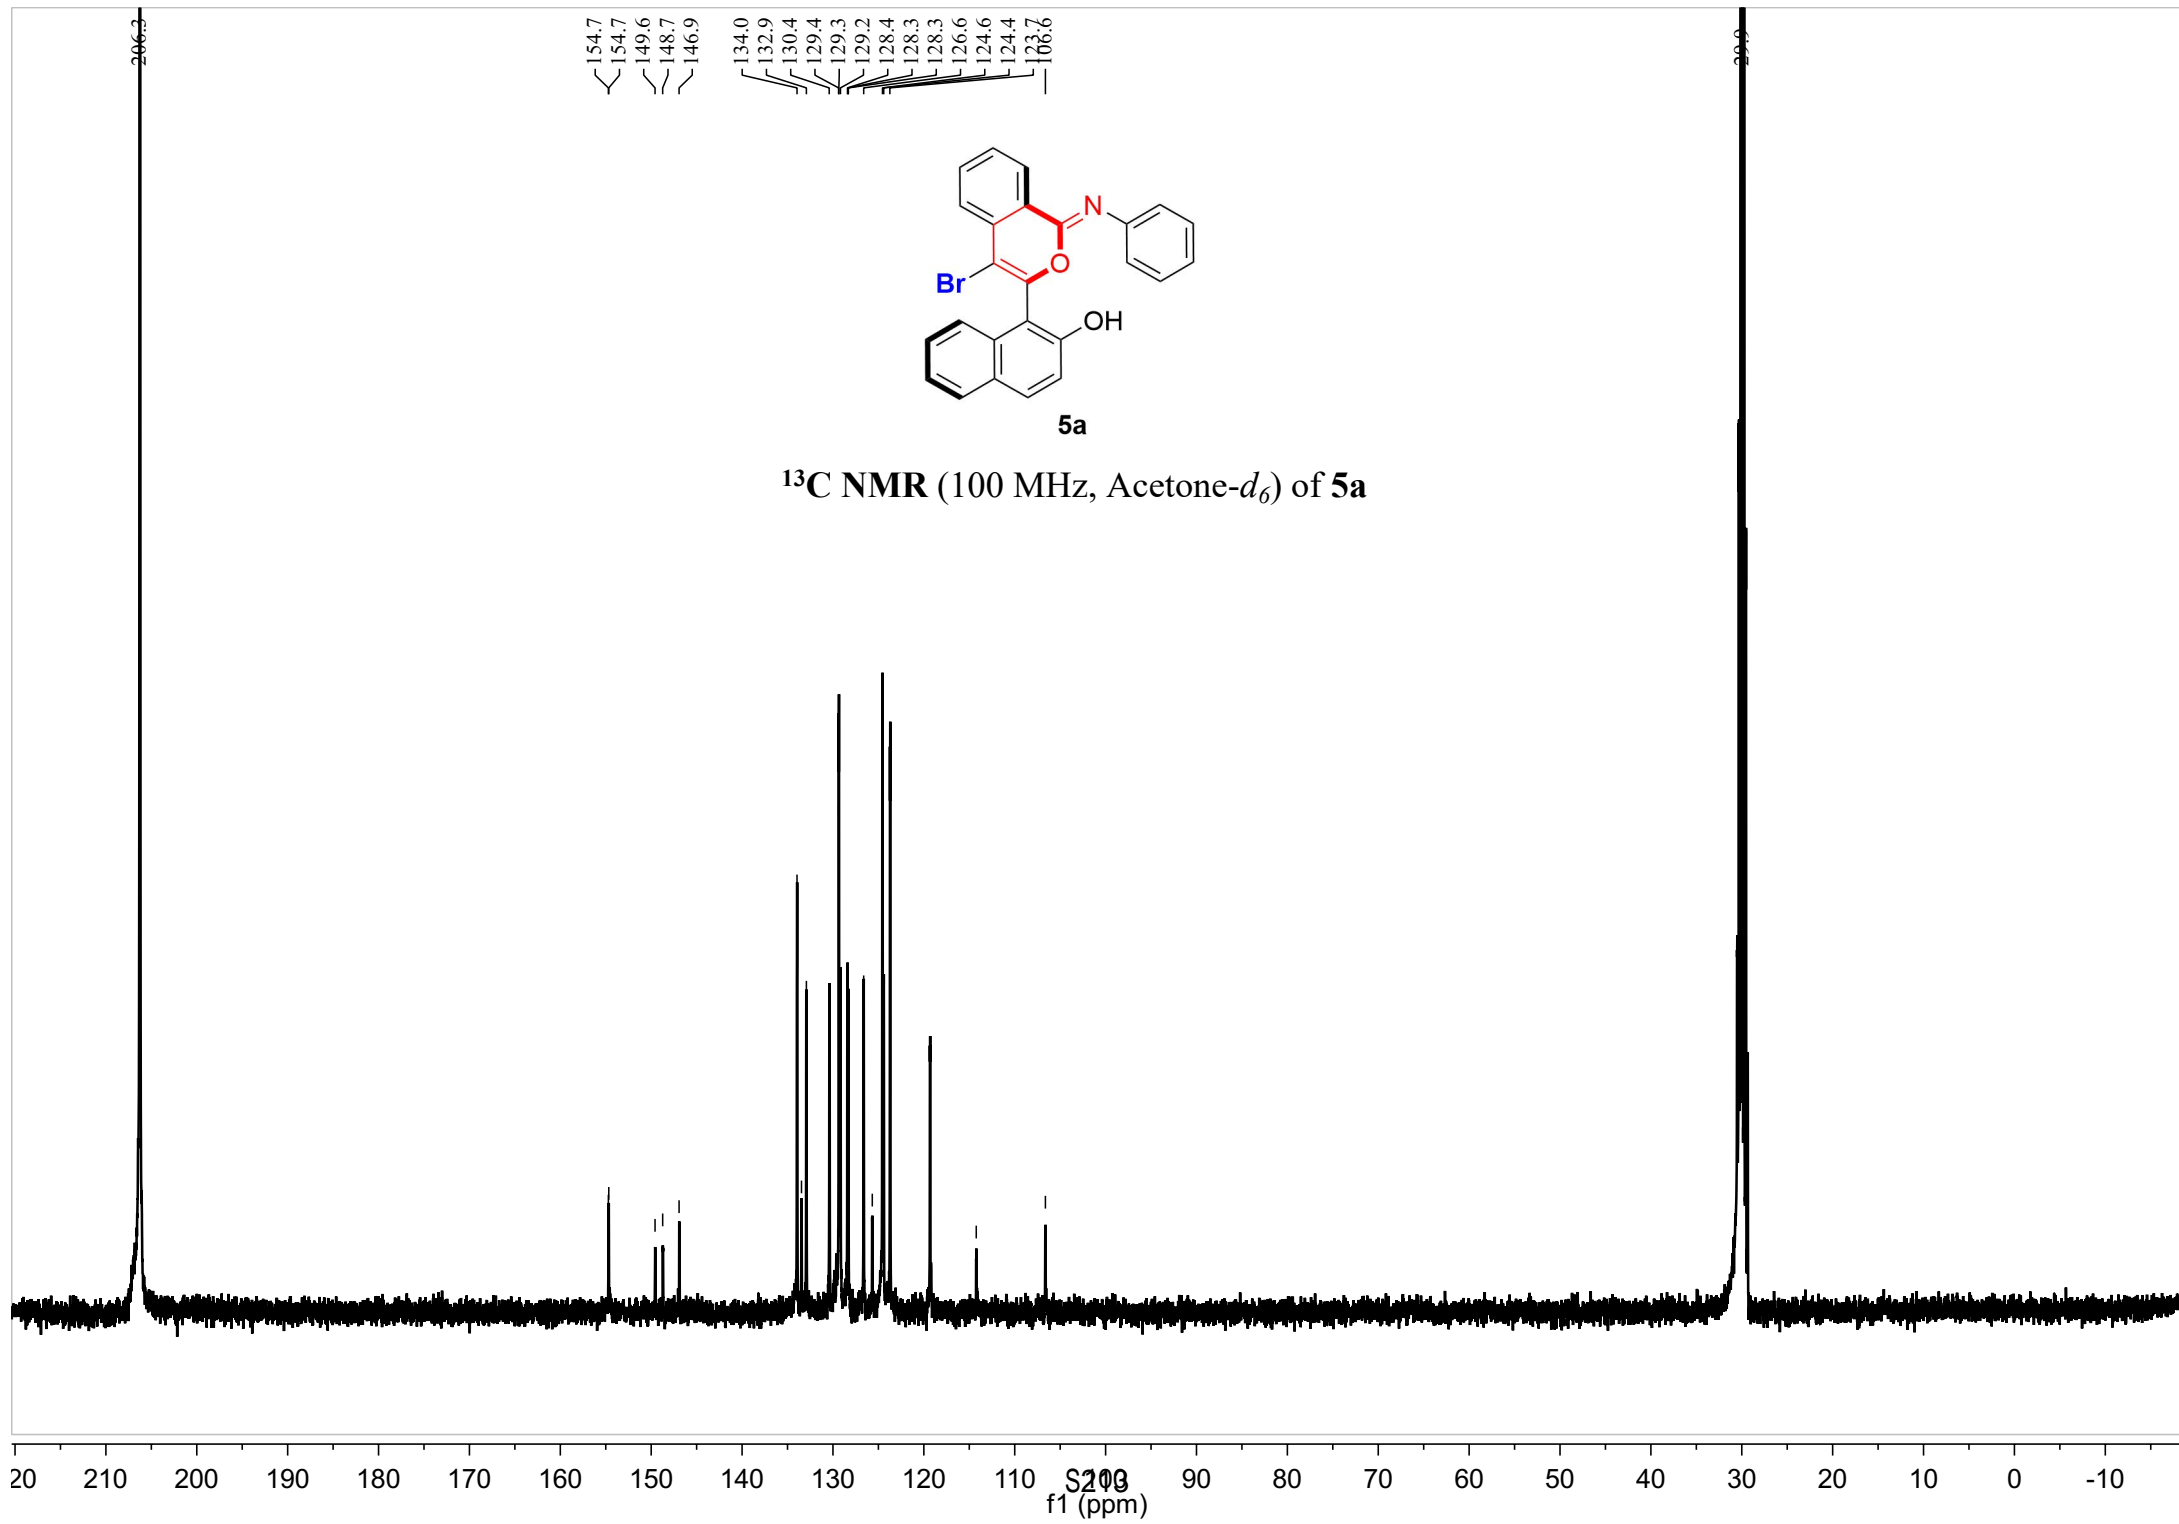

9.13  
8.51  
8.49  
7.90  
7.87  
7.84  
7.82  
7.75  
7.73  
7.69  
7.68  
7.67  
7.50  
7.48  
7.46  
7.24  
7.22  
7.04  
7.02  
6.88  
6.78  
5.89  
2.21  
2.05  
0.00

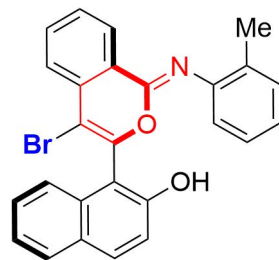

5b

<sup>1</sup>H NMR (400 MHz, Acetone-d<sub>6</sub>) of 5b

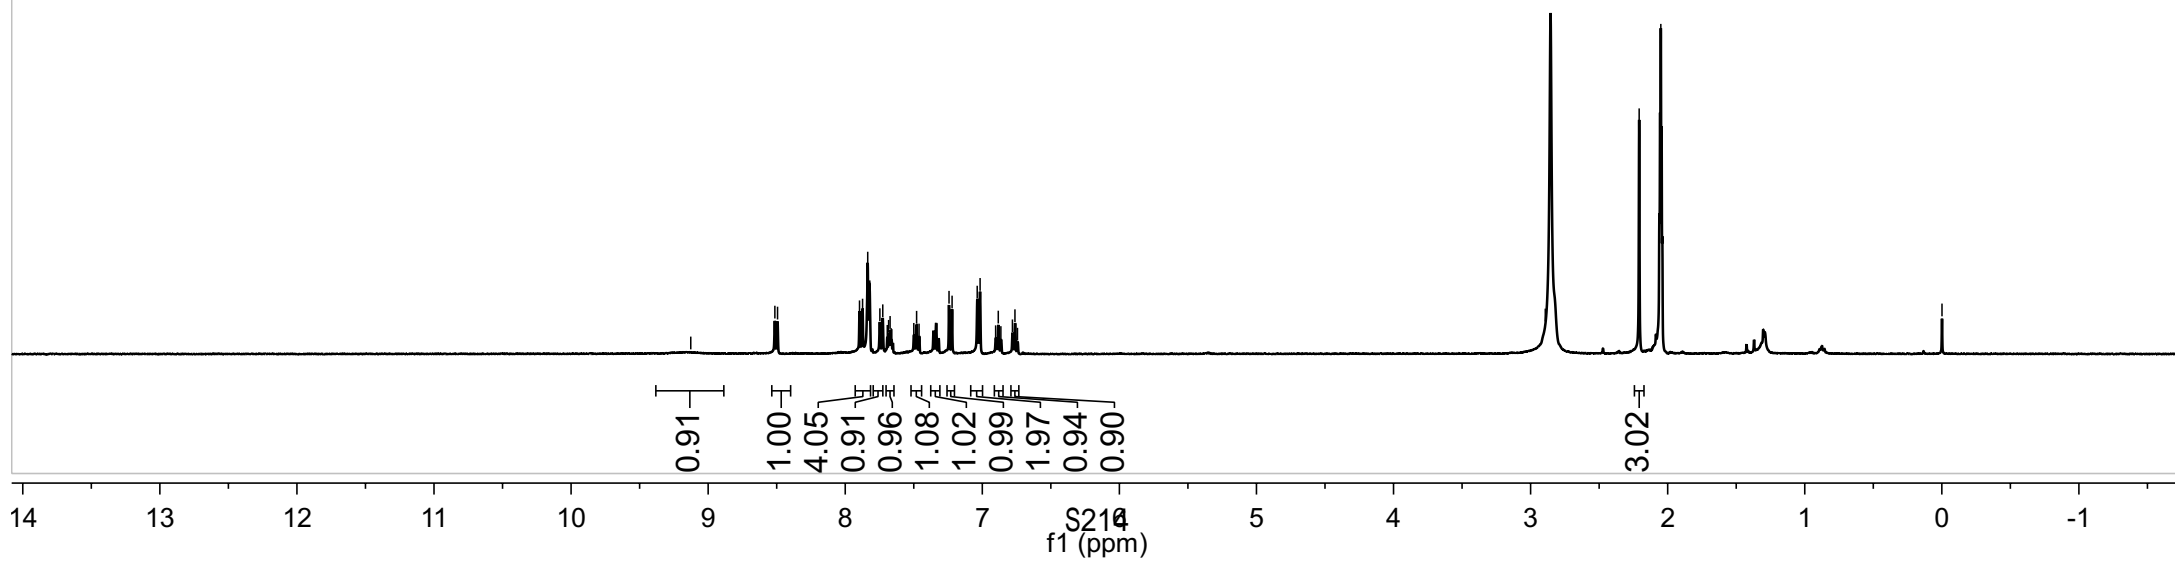

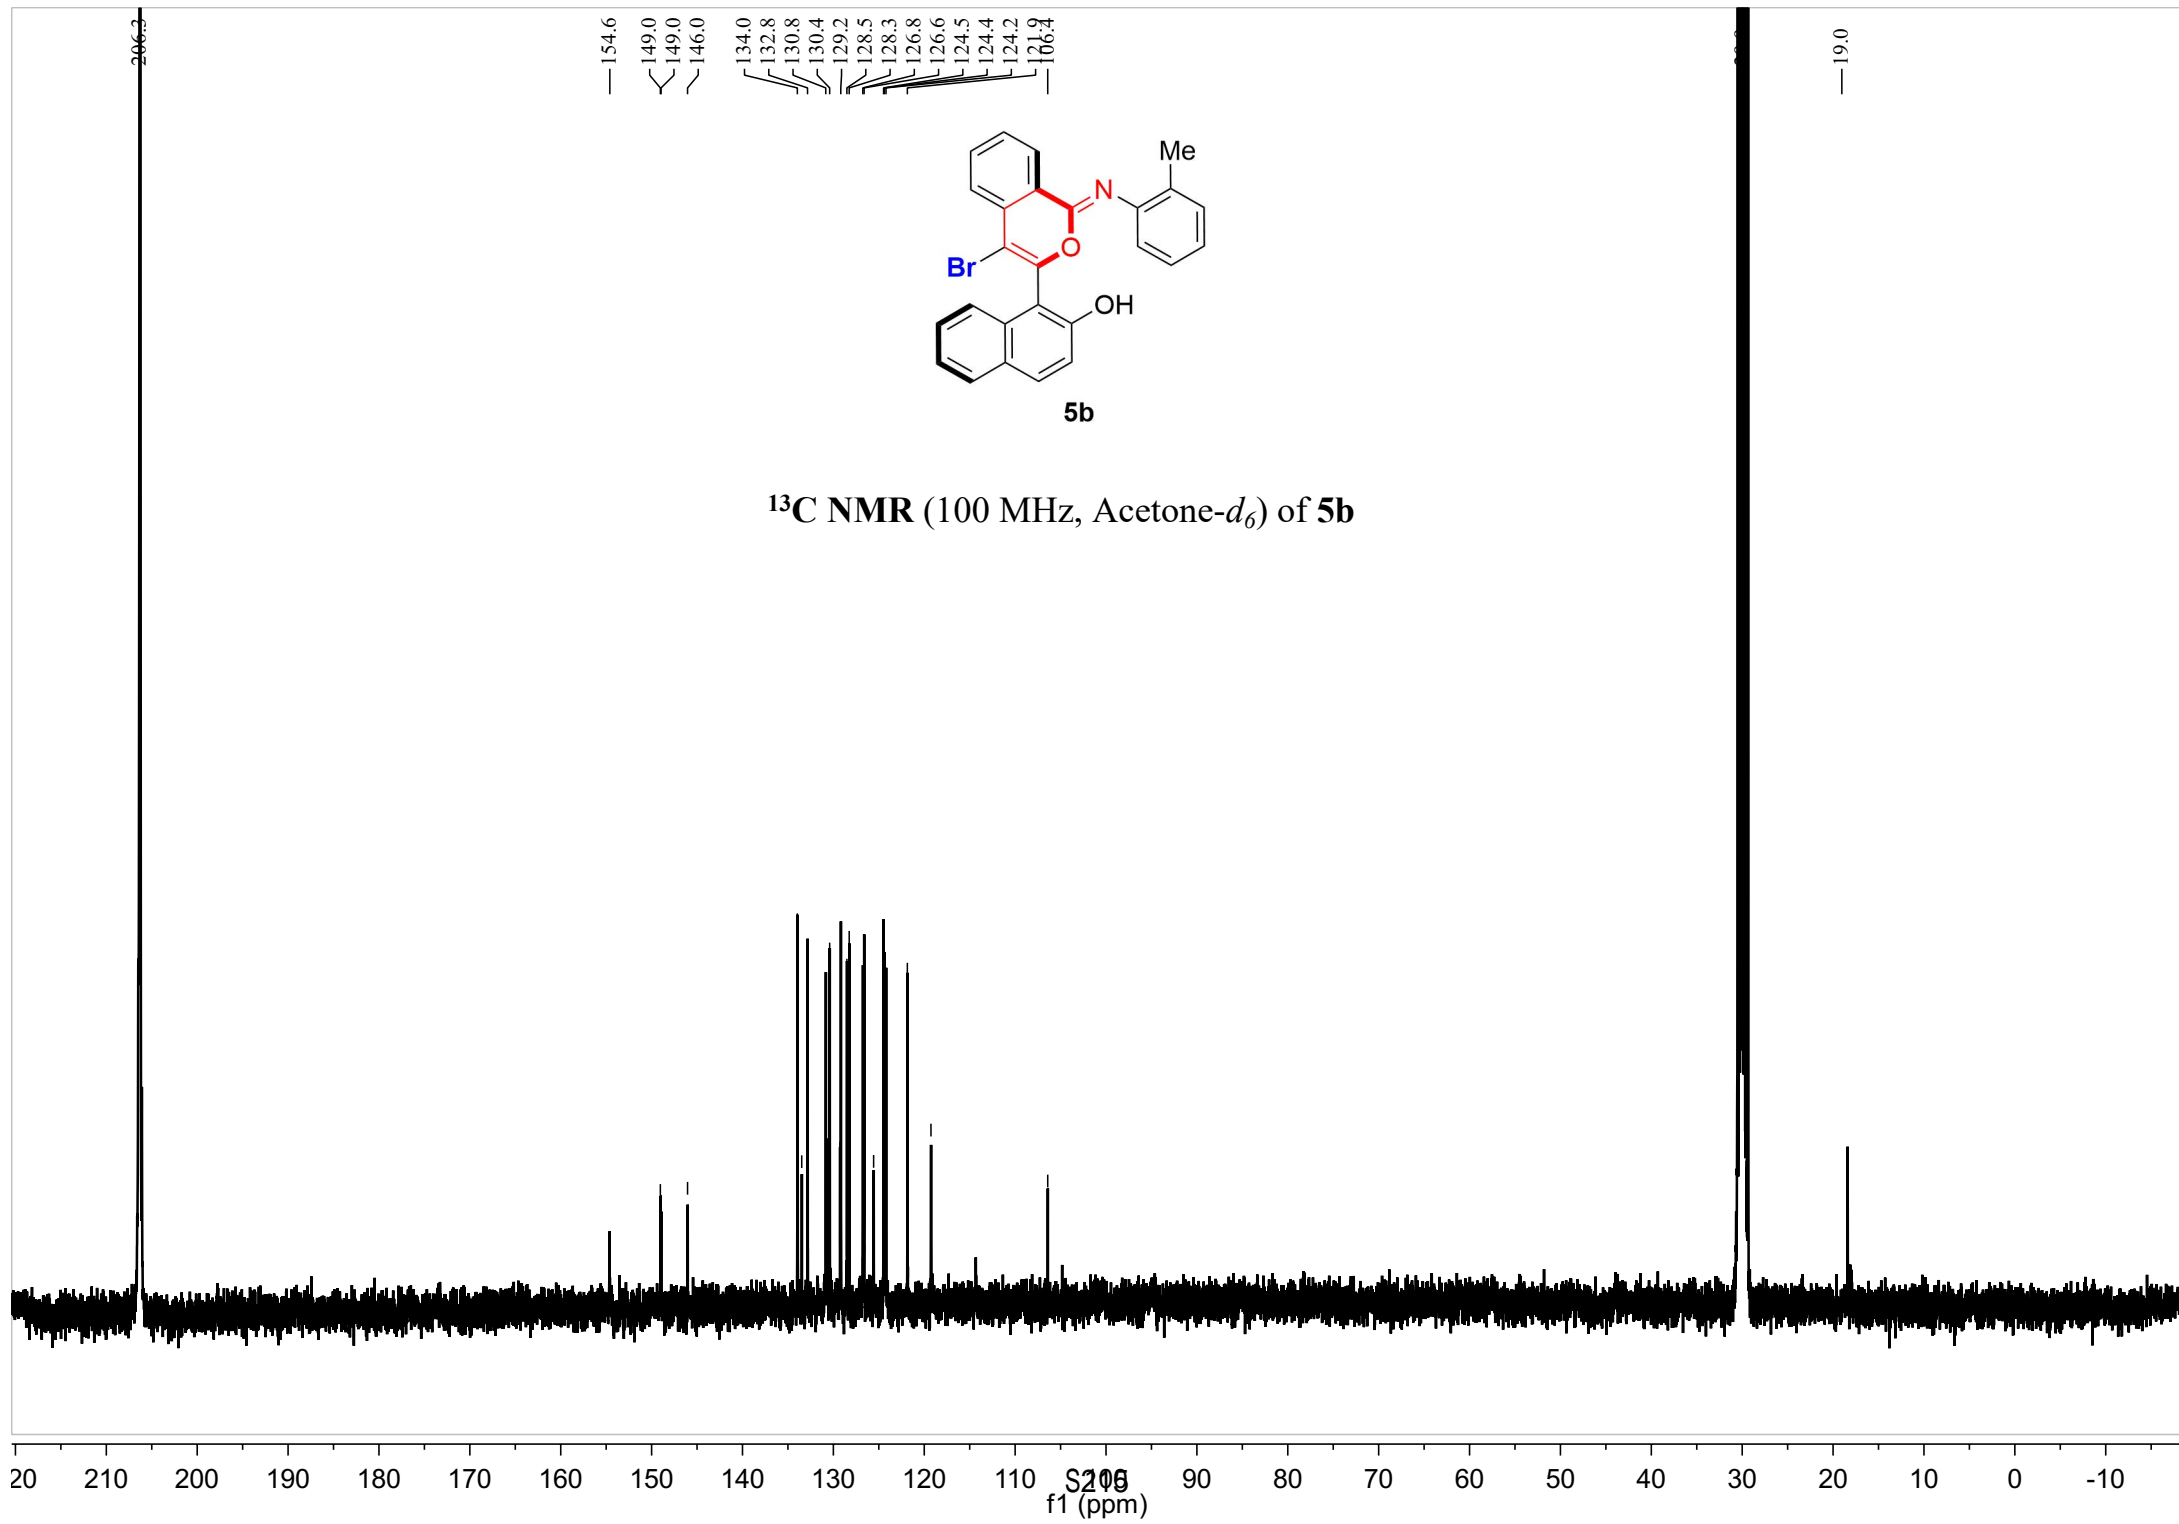

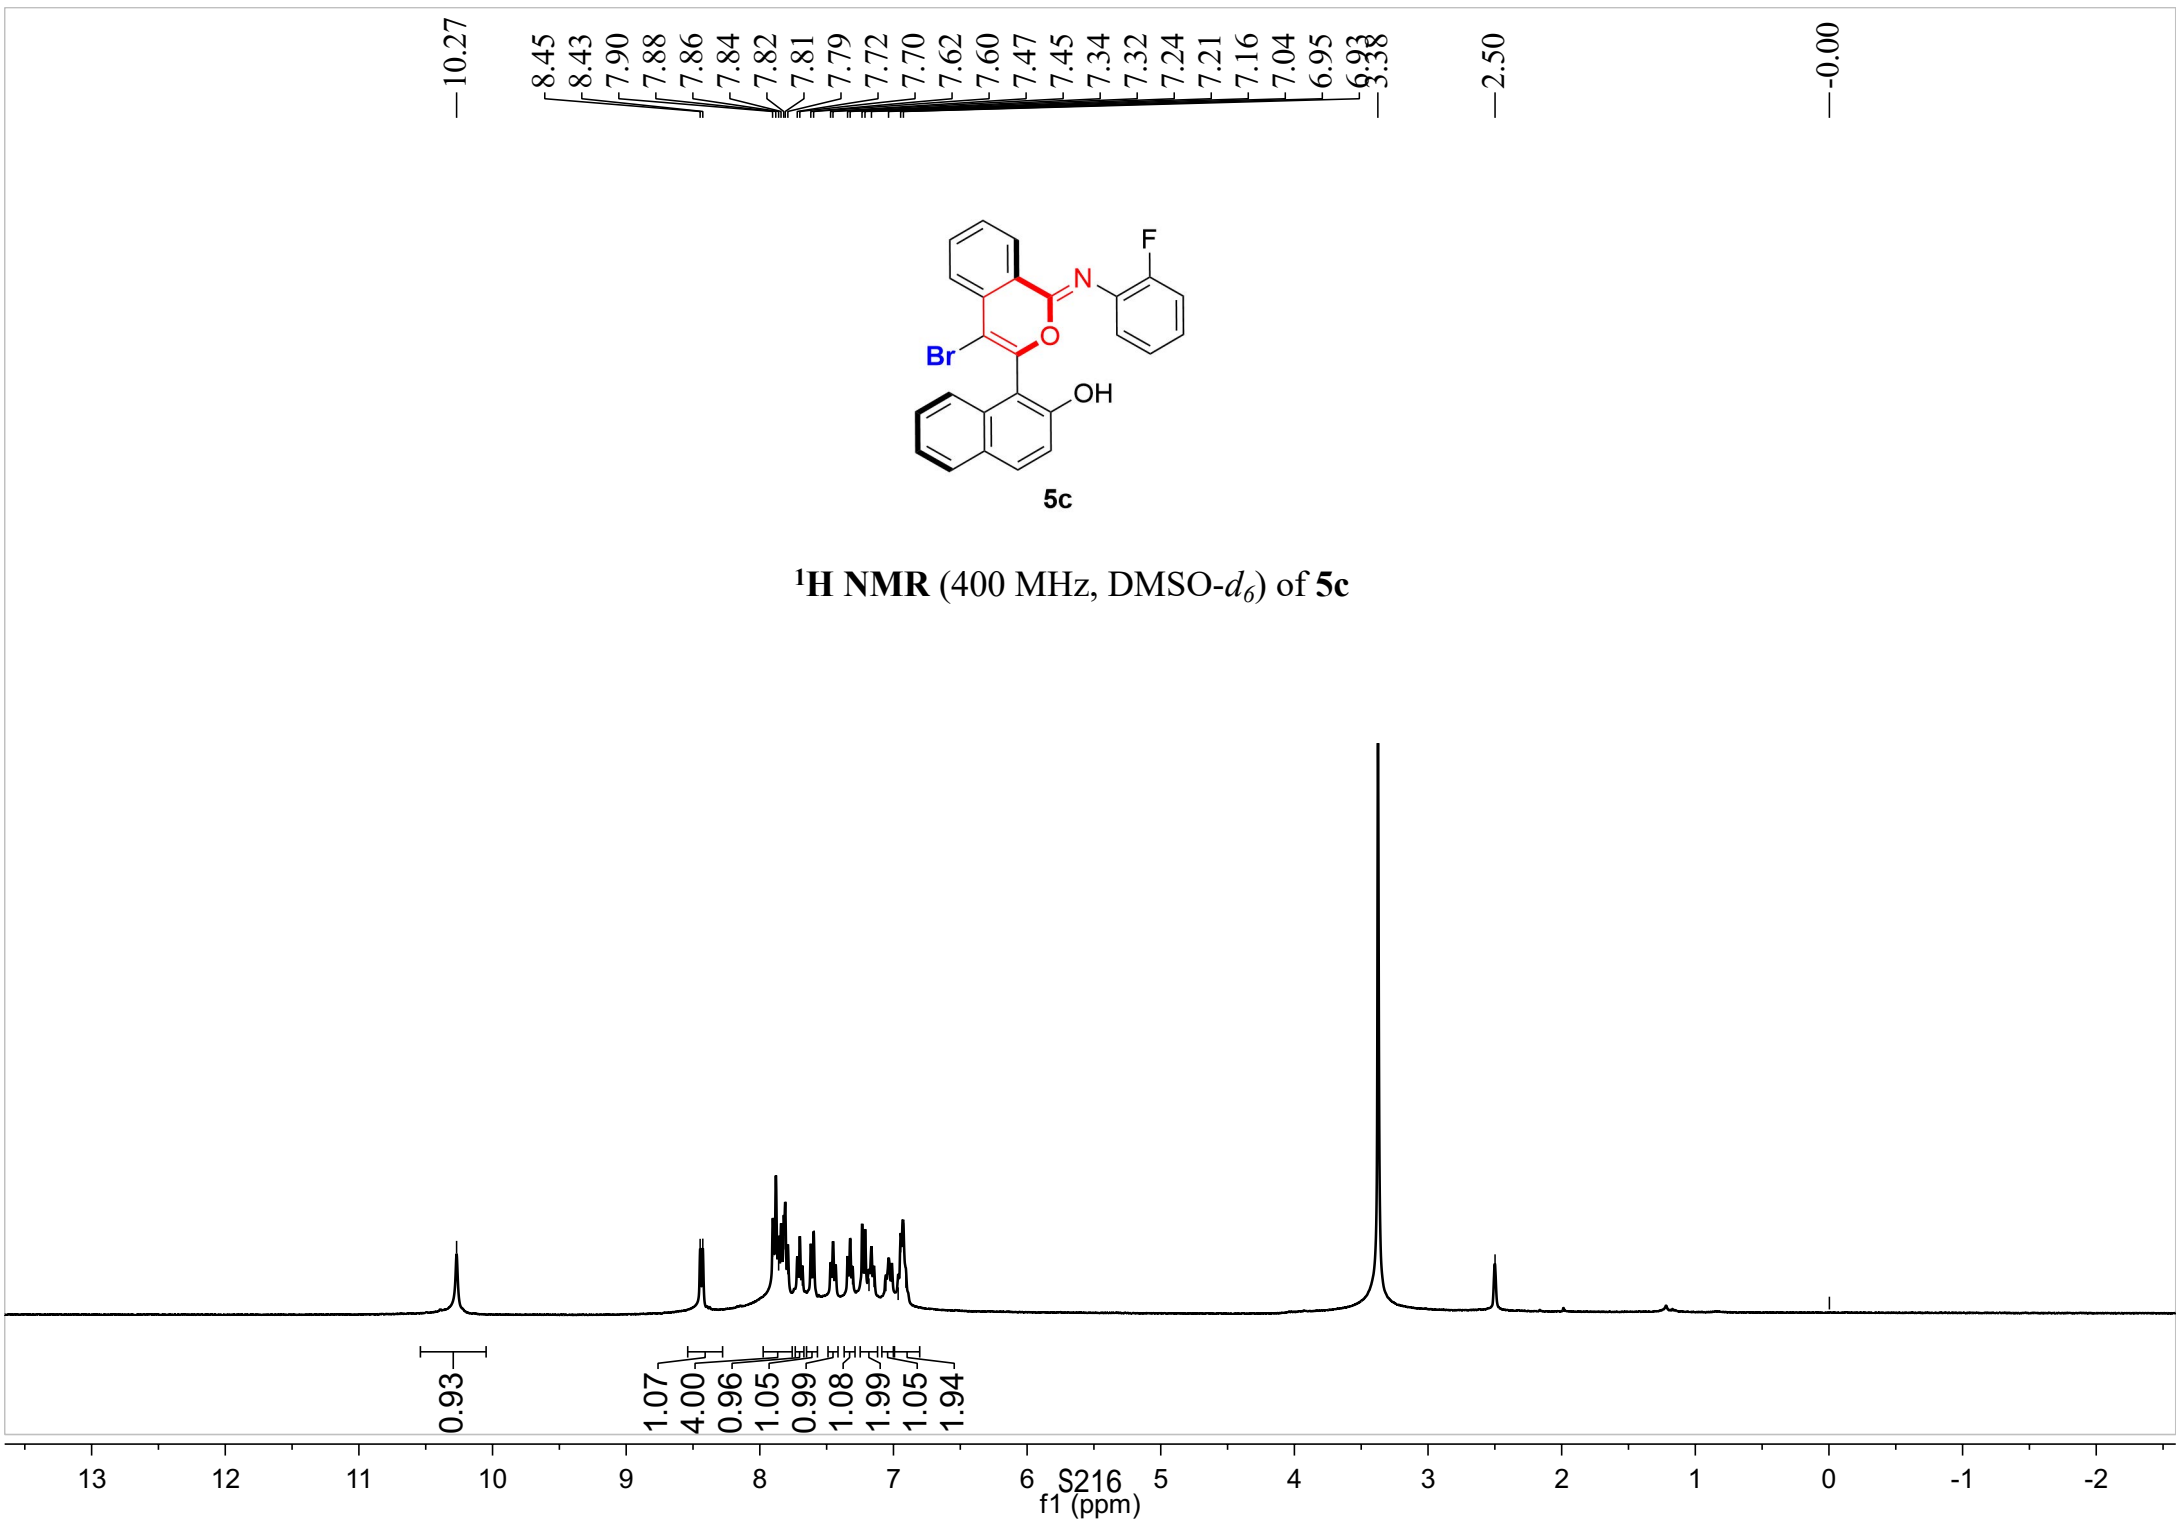



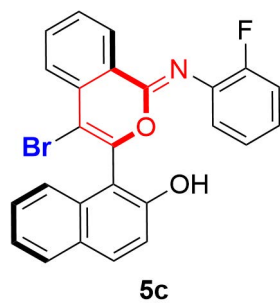

$^{19}\text{F}$  NMR (376 MHz,  $\text{DMSO-}d_6$ ) of **5c**

— -123.44

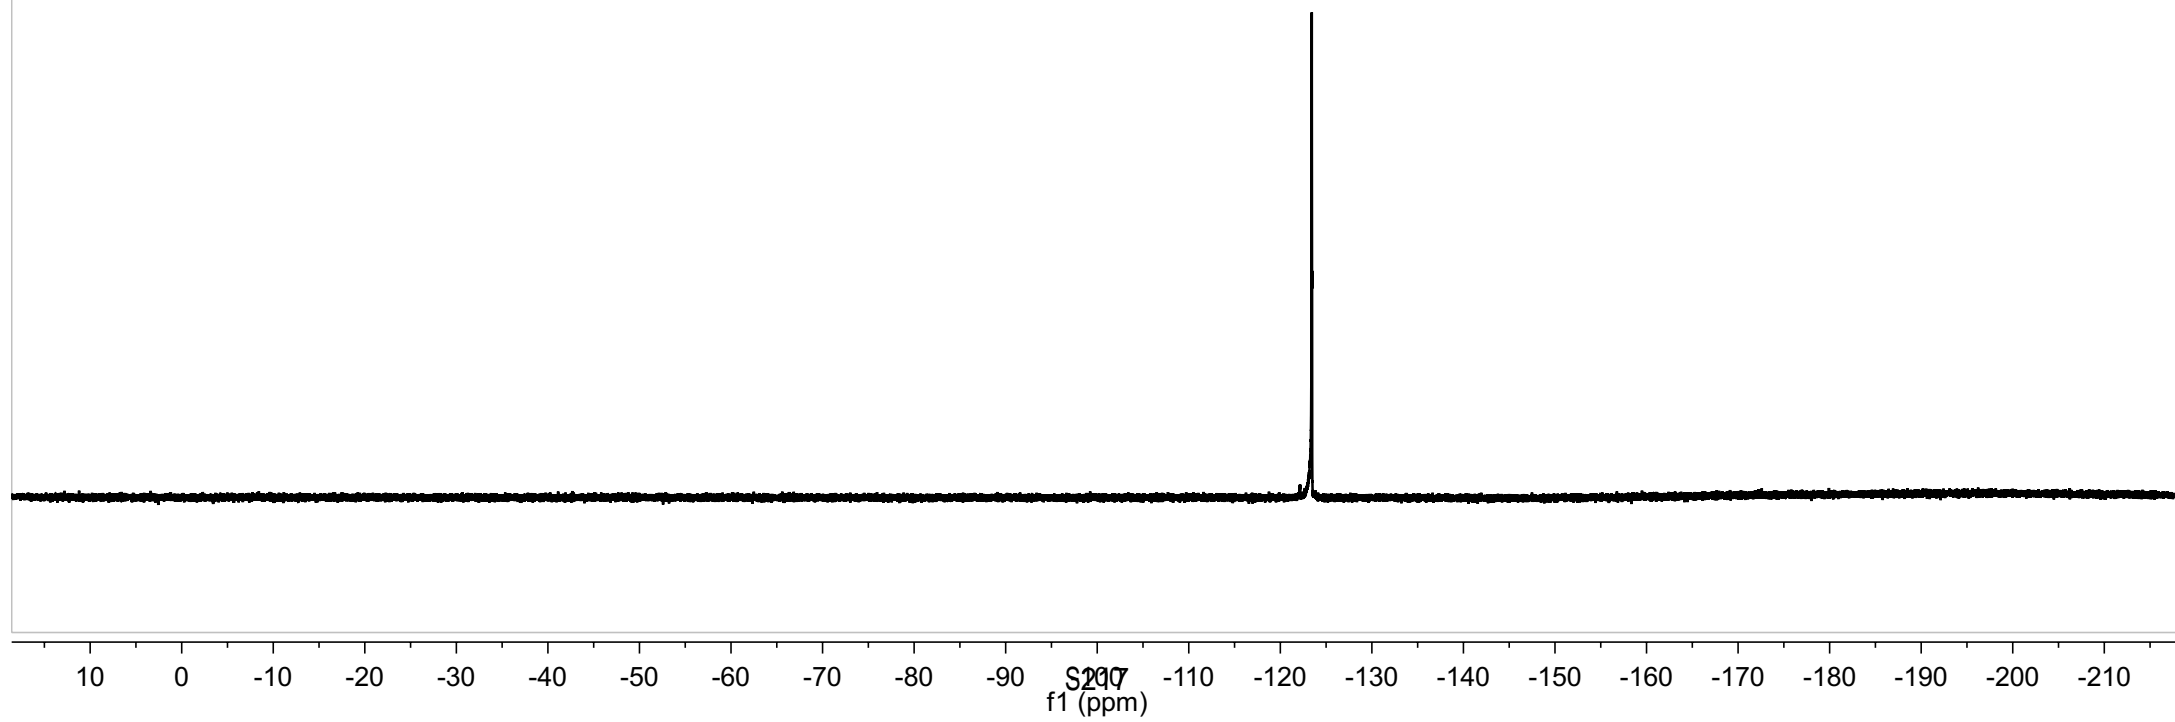

154.9  
153.9  
152.5  
150.4  
147.7  
133.8  
132.0  
131.8  
129.7  
128.1  
127.5  
127.4  
127.3  
125.5  
123.8  
123.2  
123.1  
123.0  
118.3  
105.4

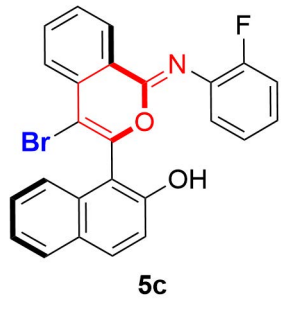

<sup>13</sup>C NMR (100 MHz, DMSO-*d*<sub>6</sub>) of 5c

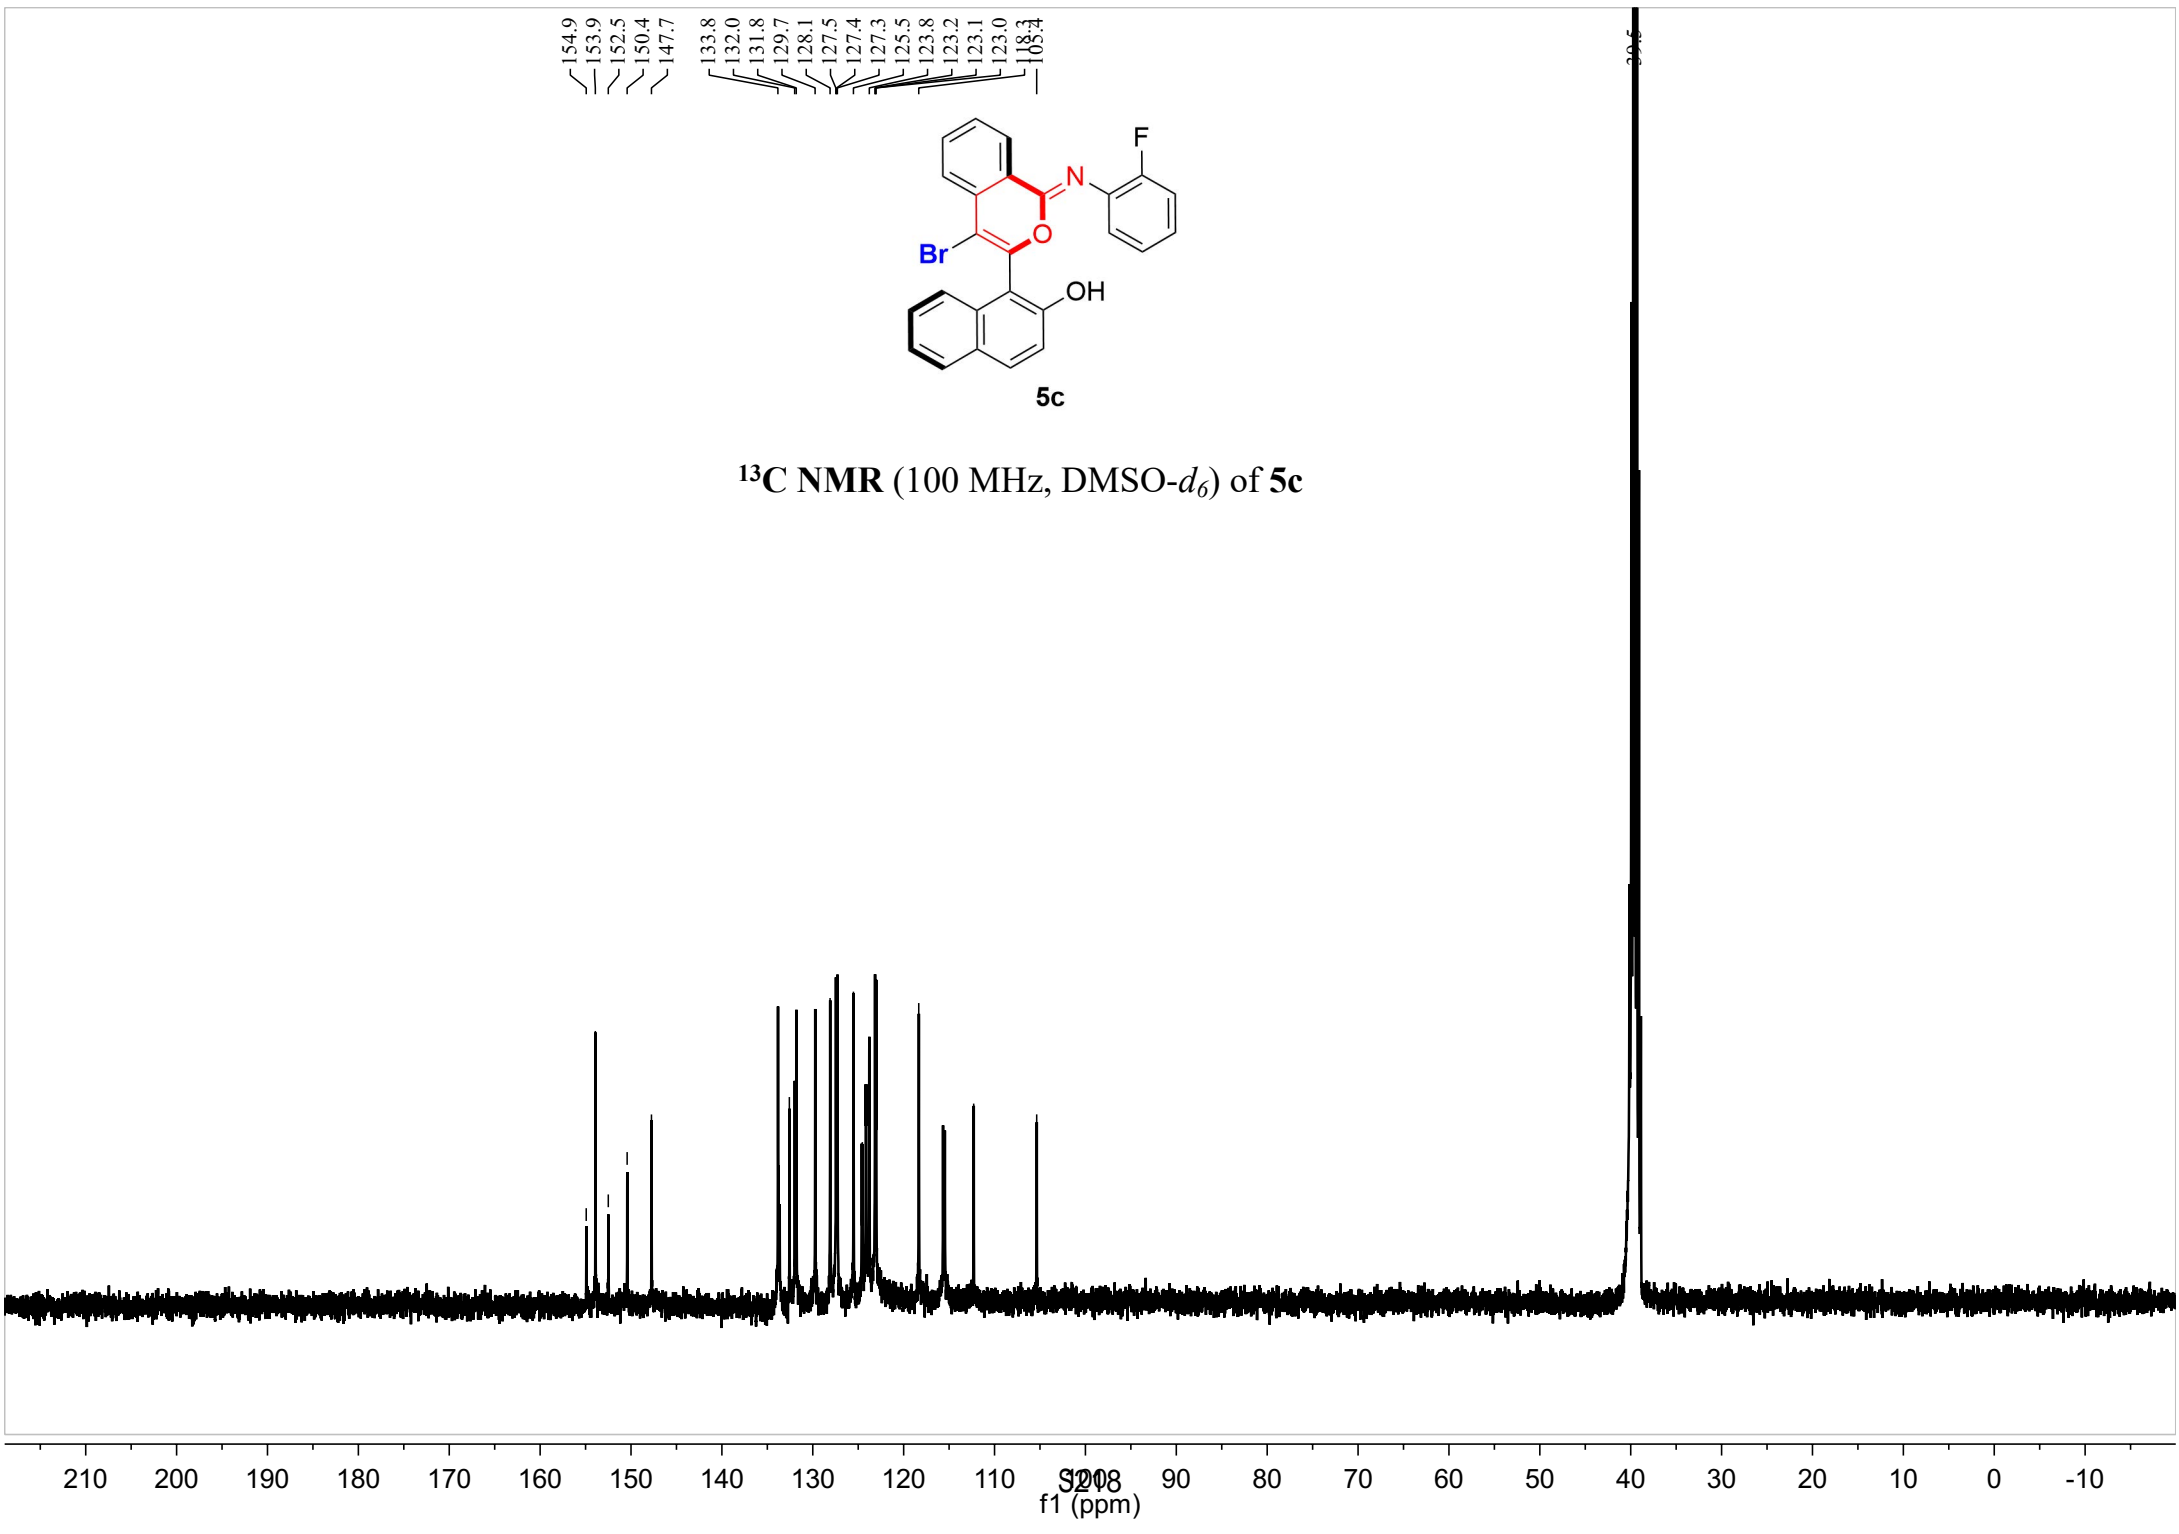

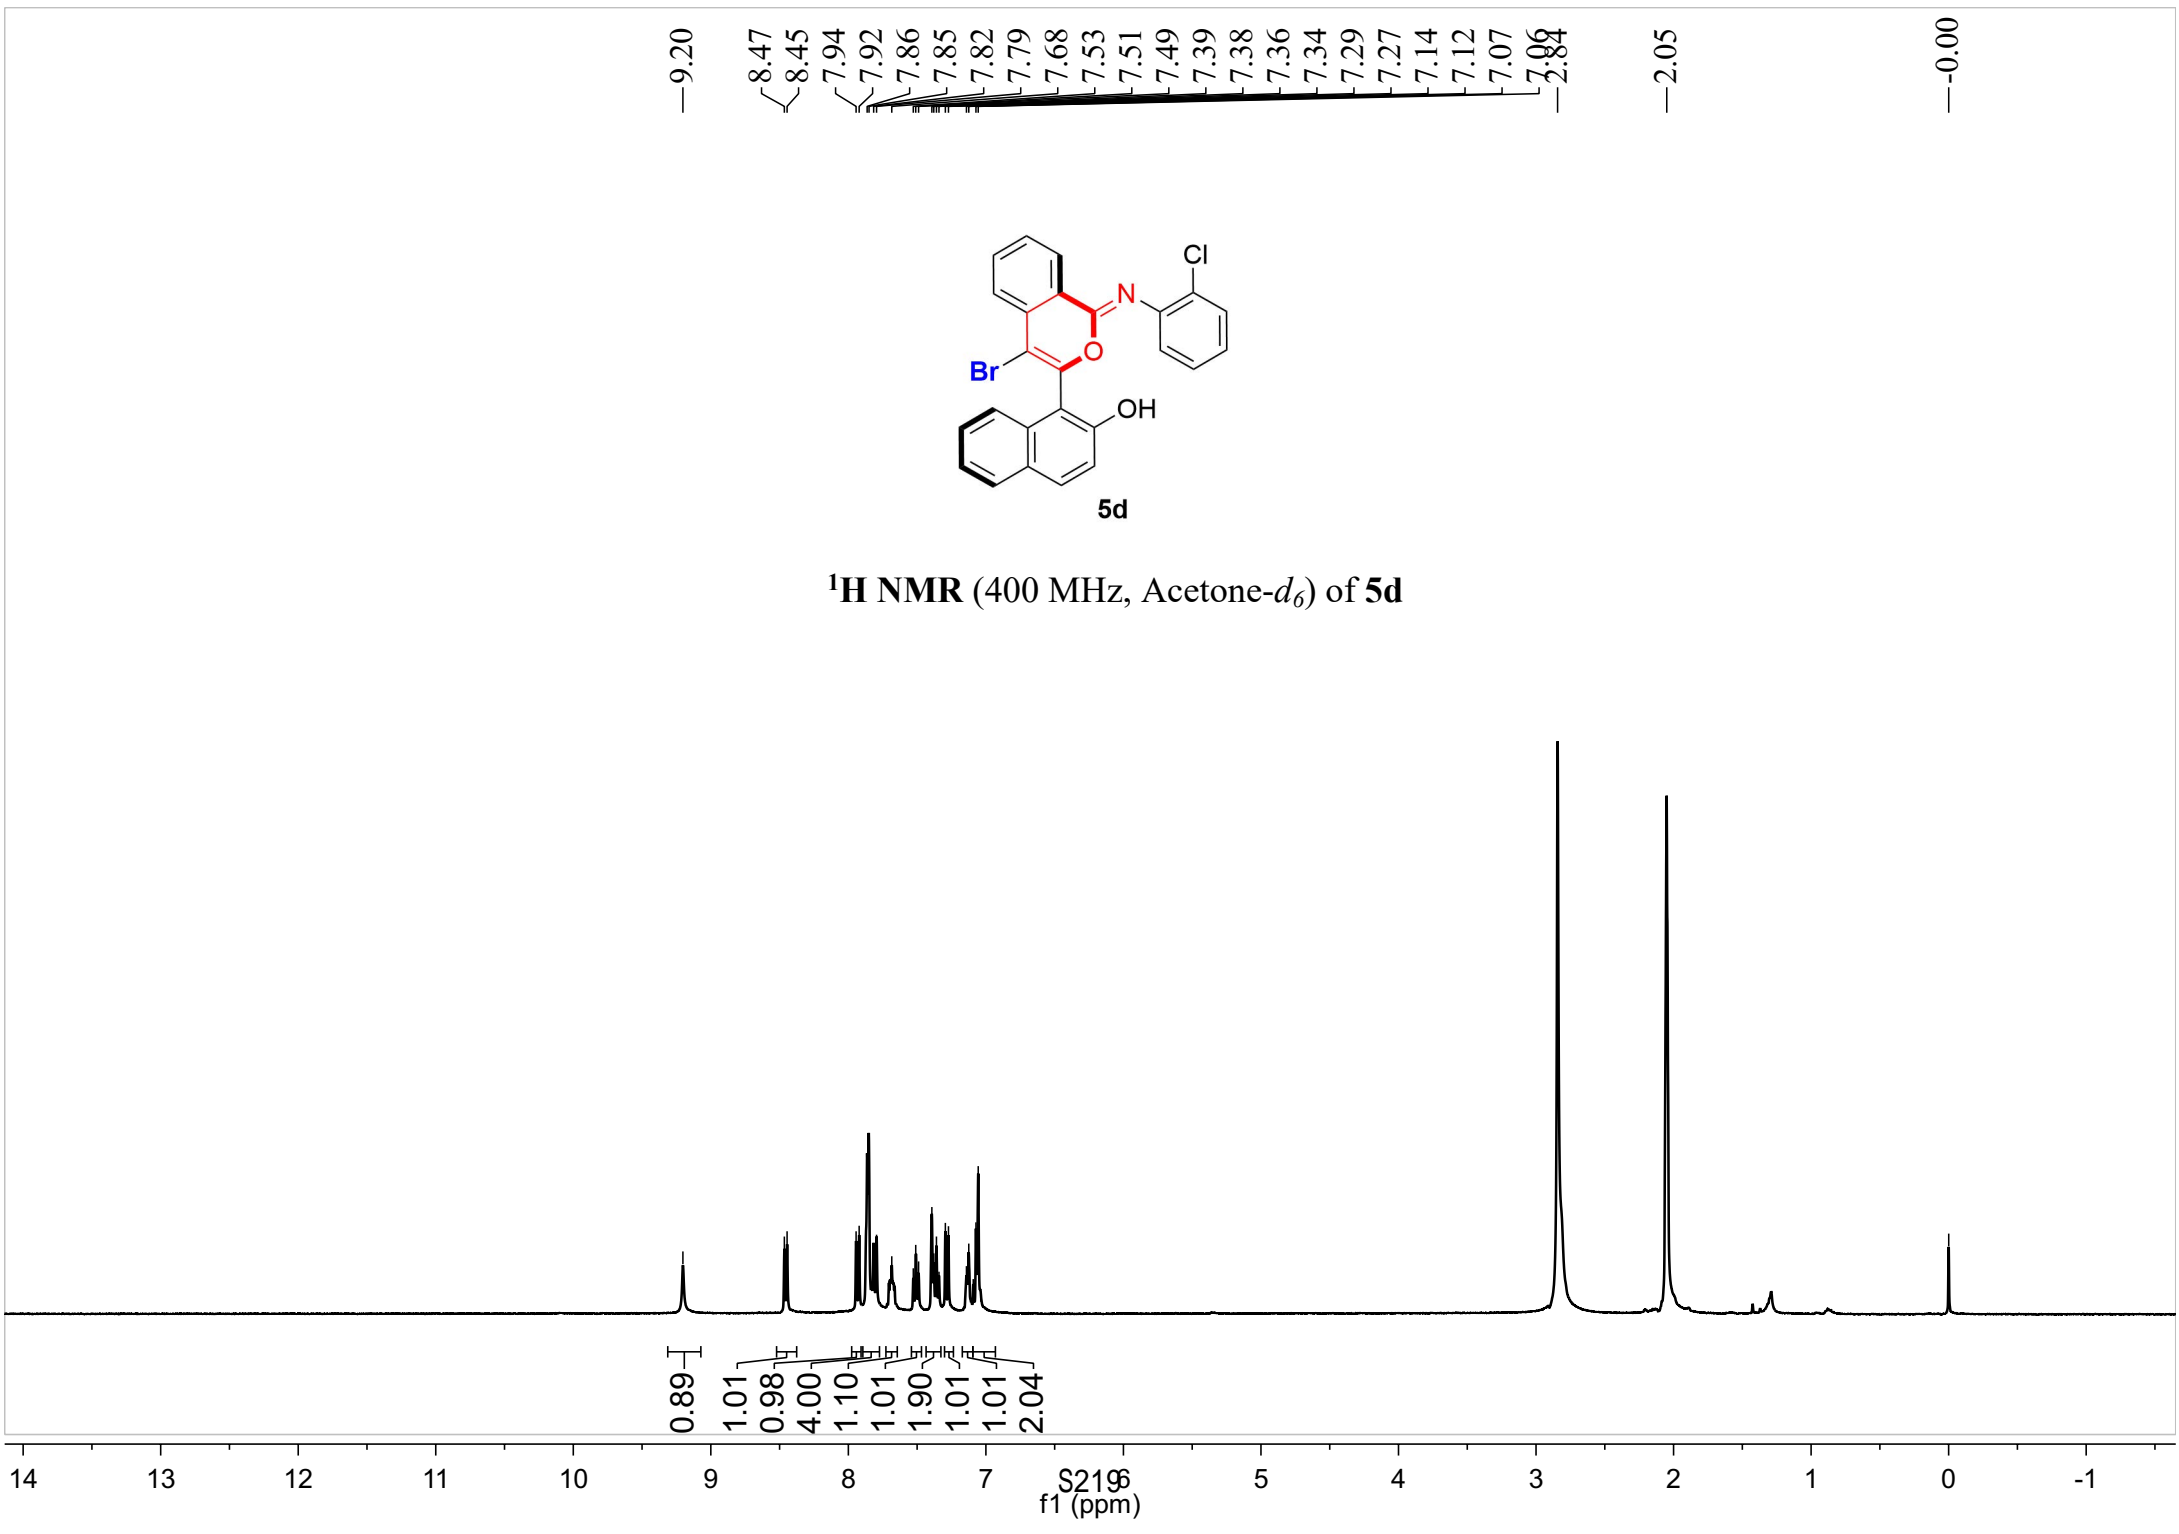

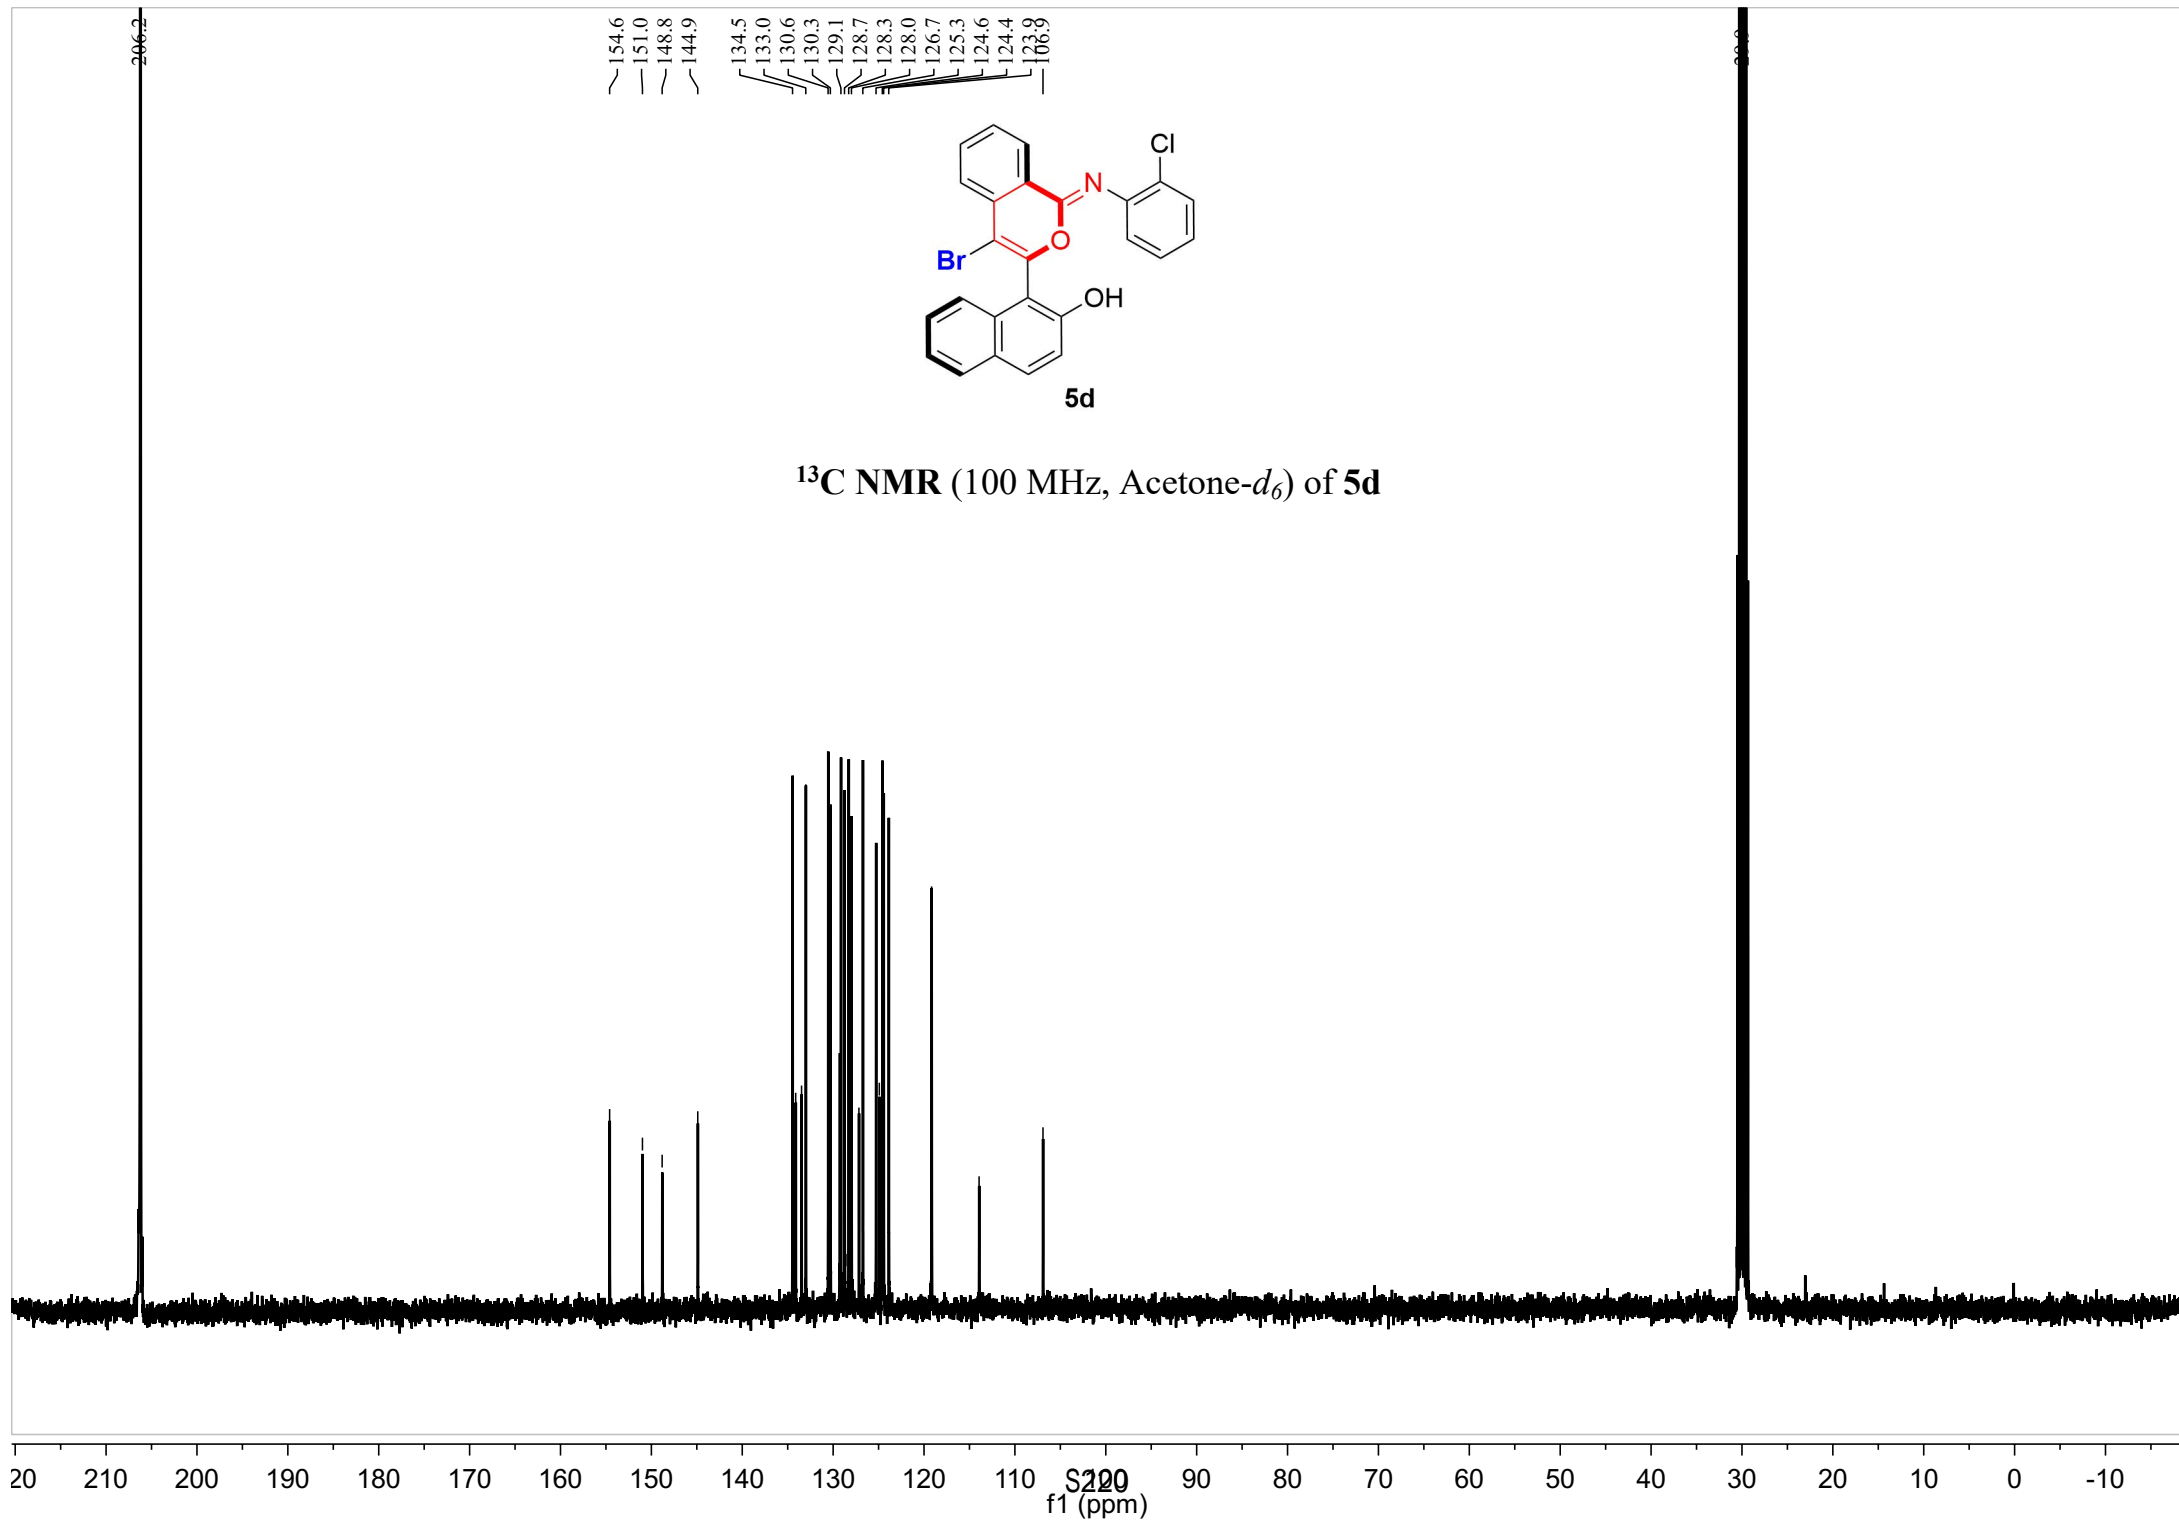

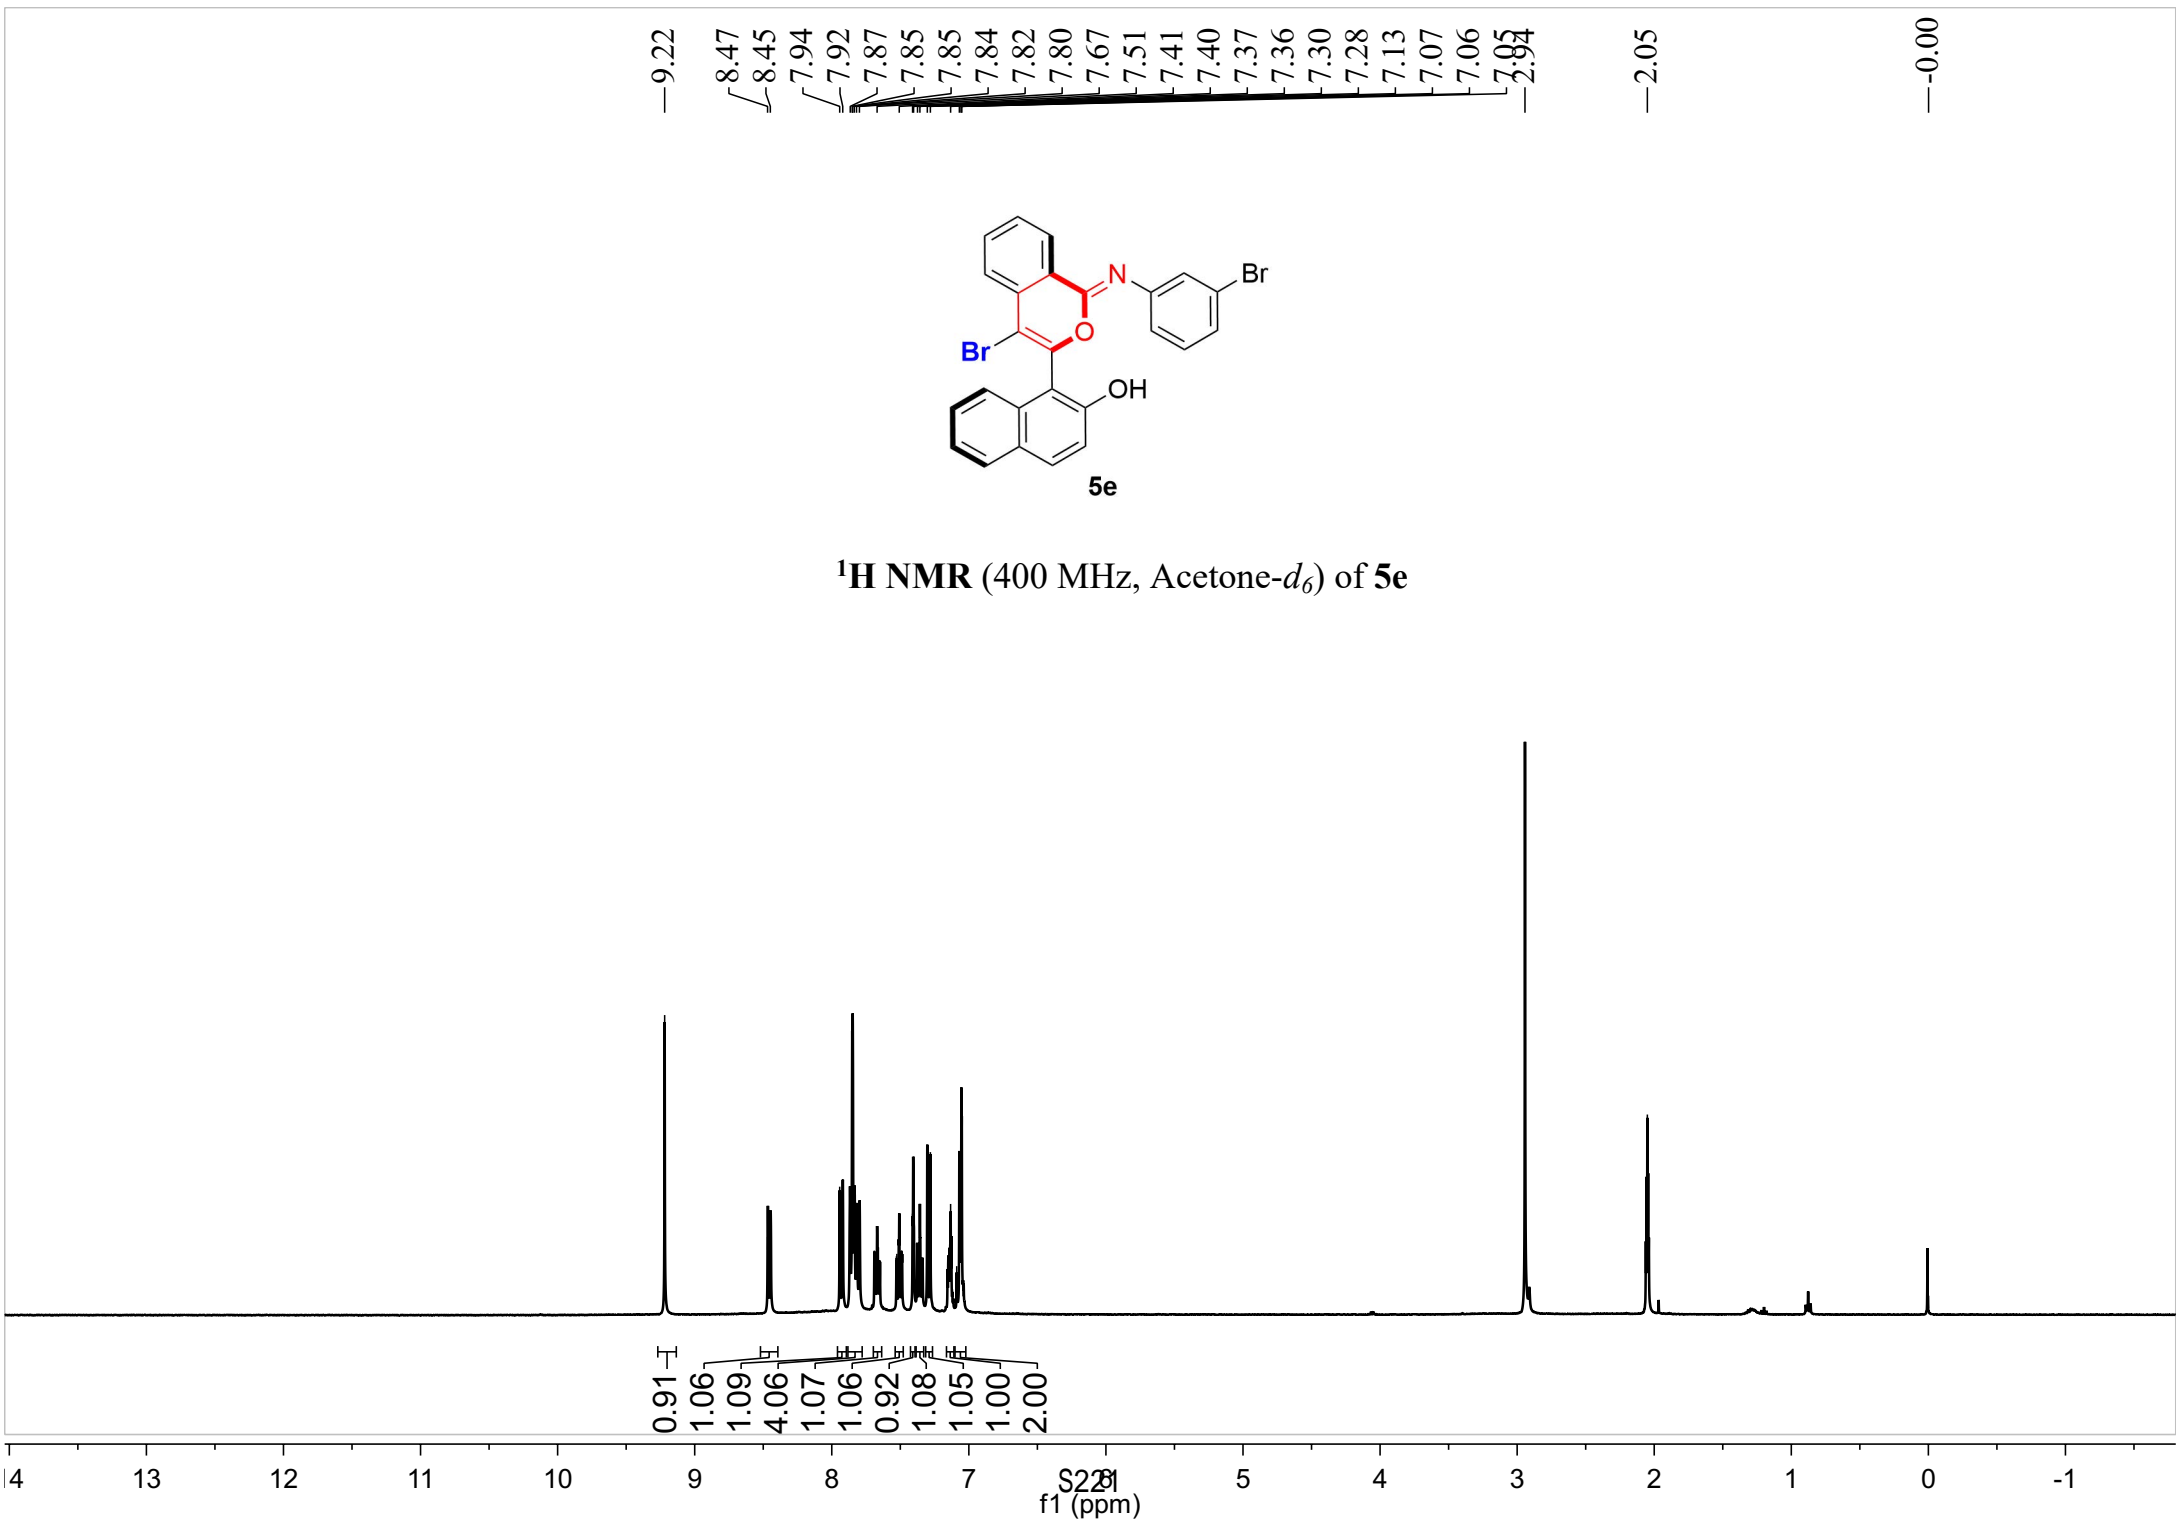

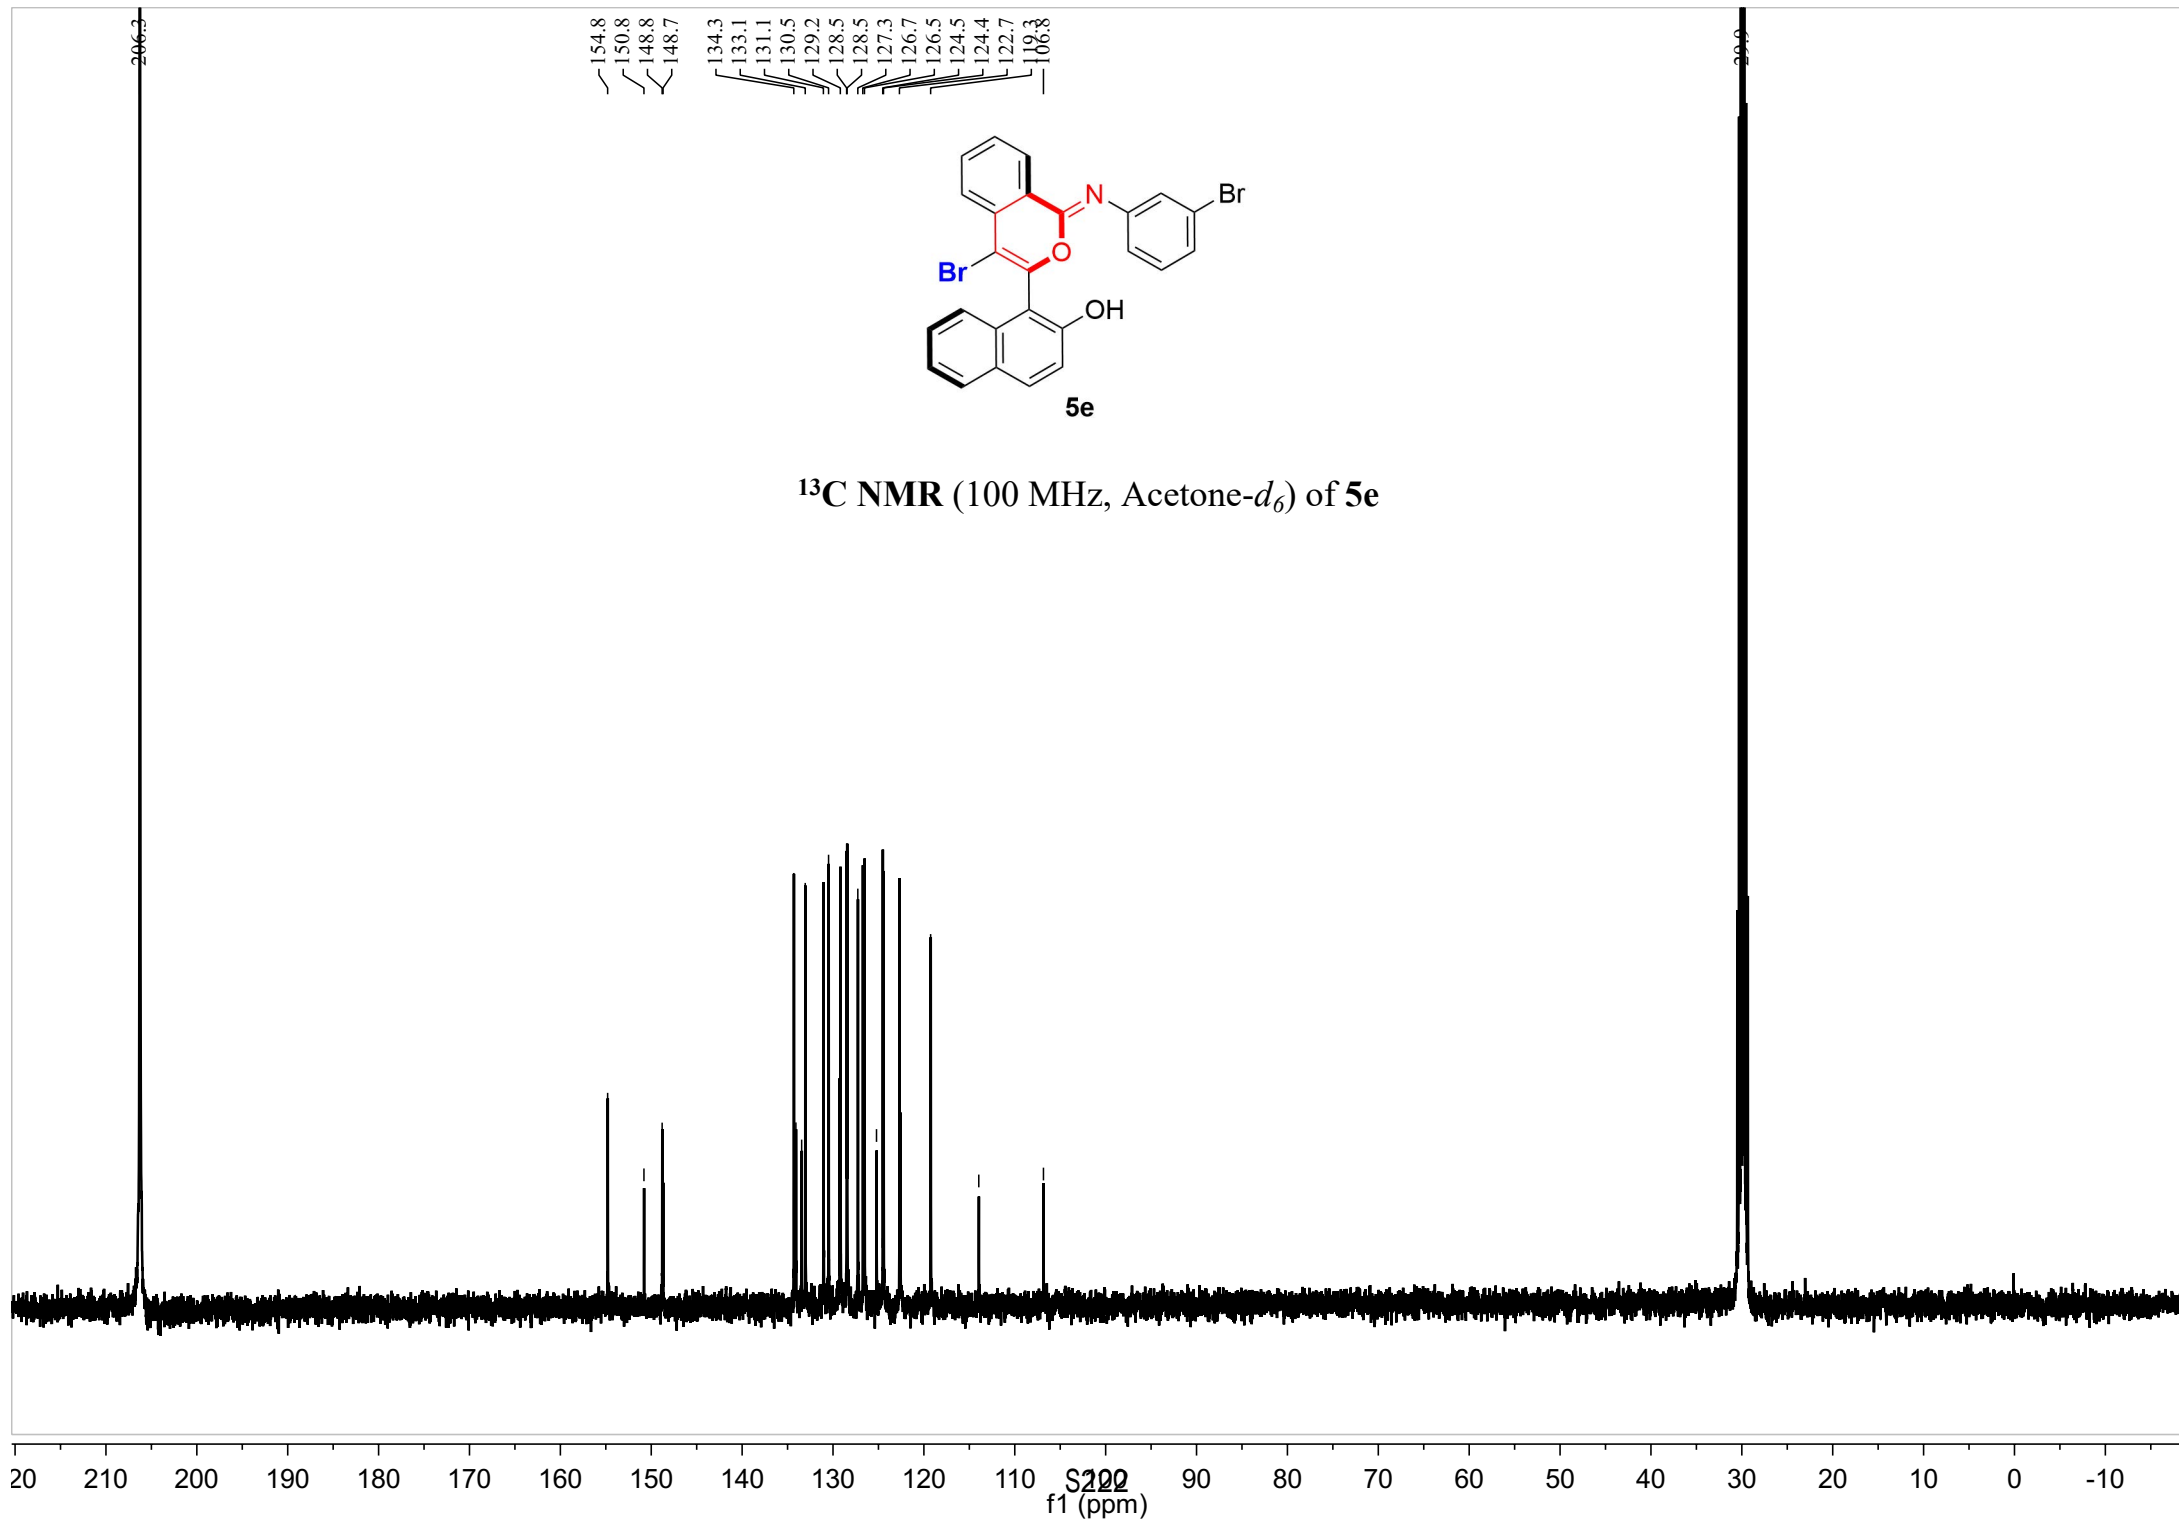

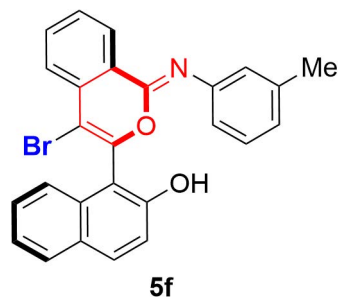

<sup>1</sup>H NMR (400 MHz, Acetone-d<sub>6</sub>) of 5f

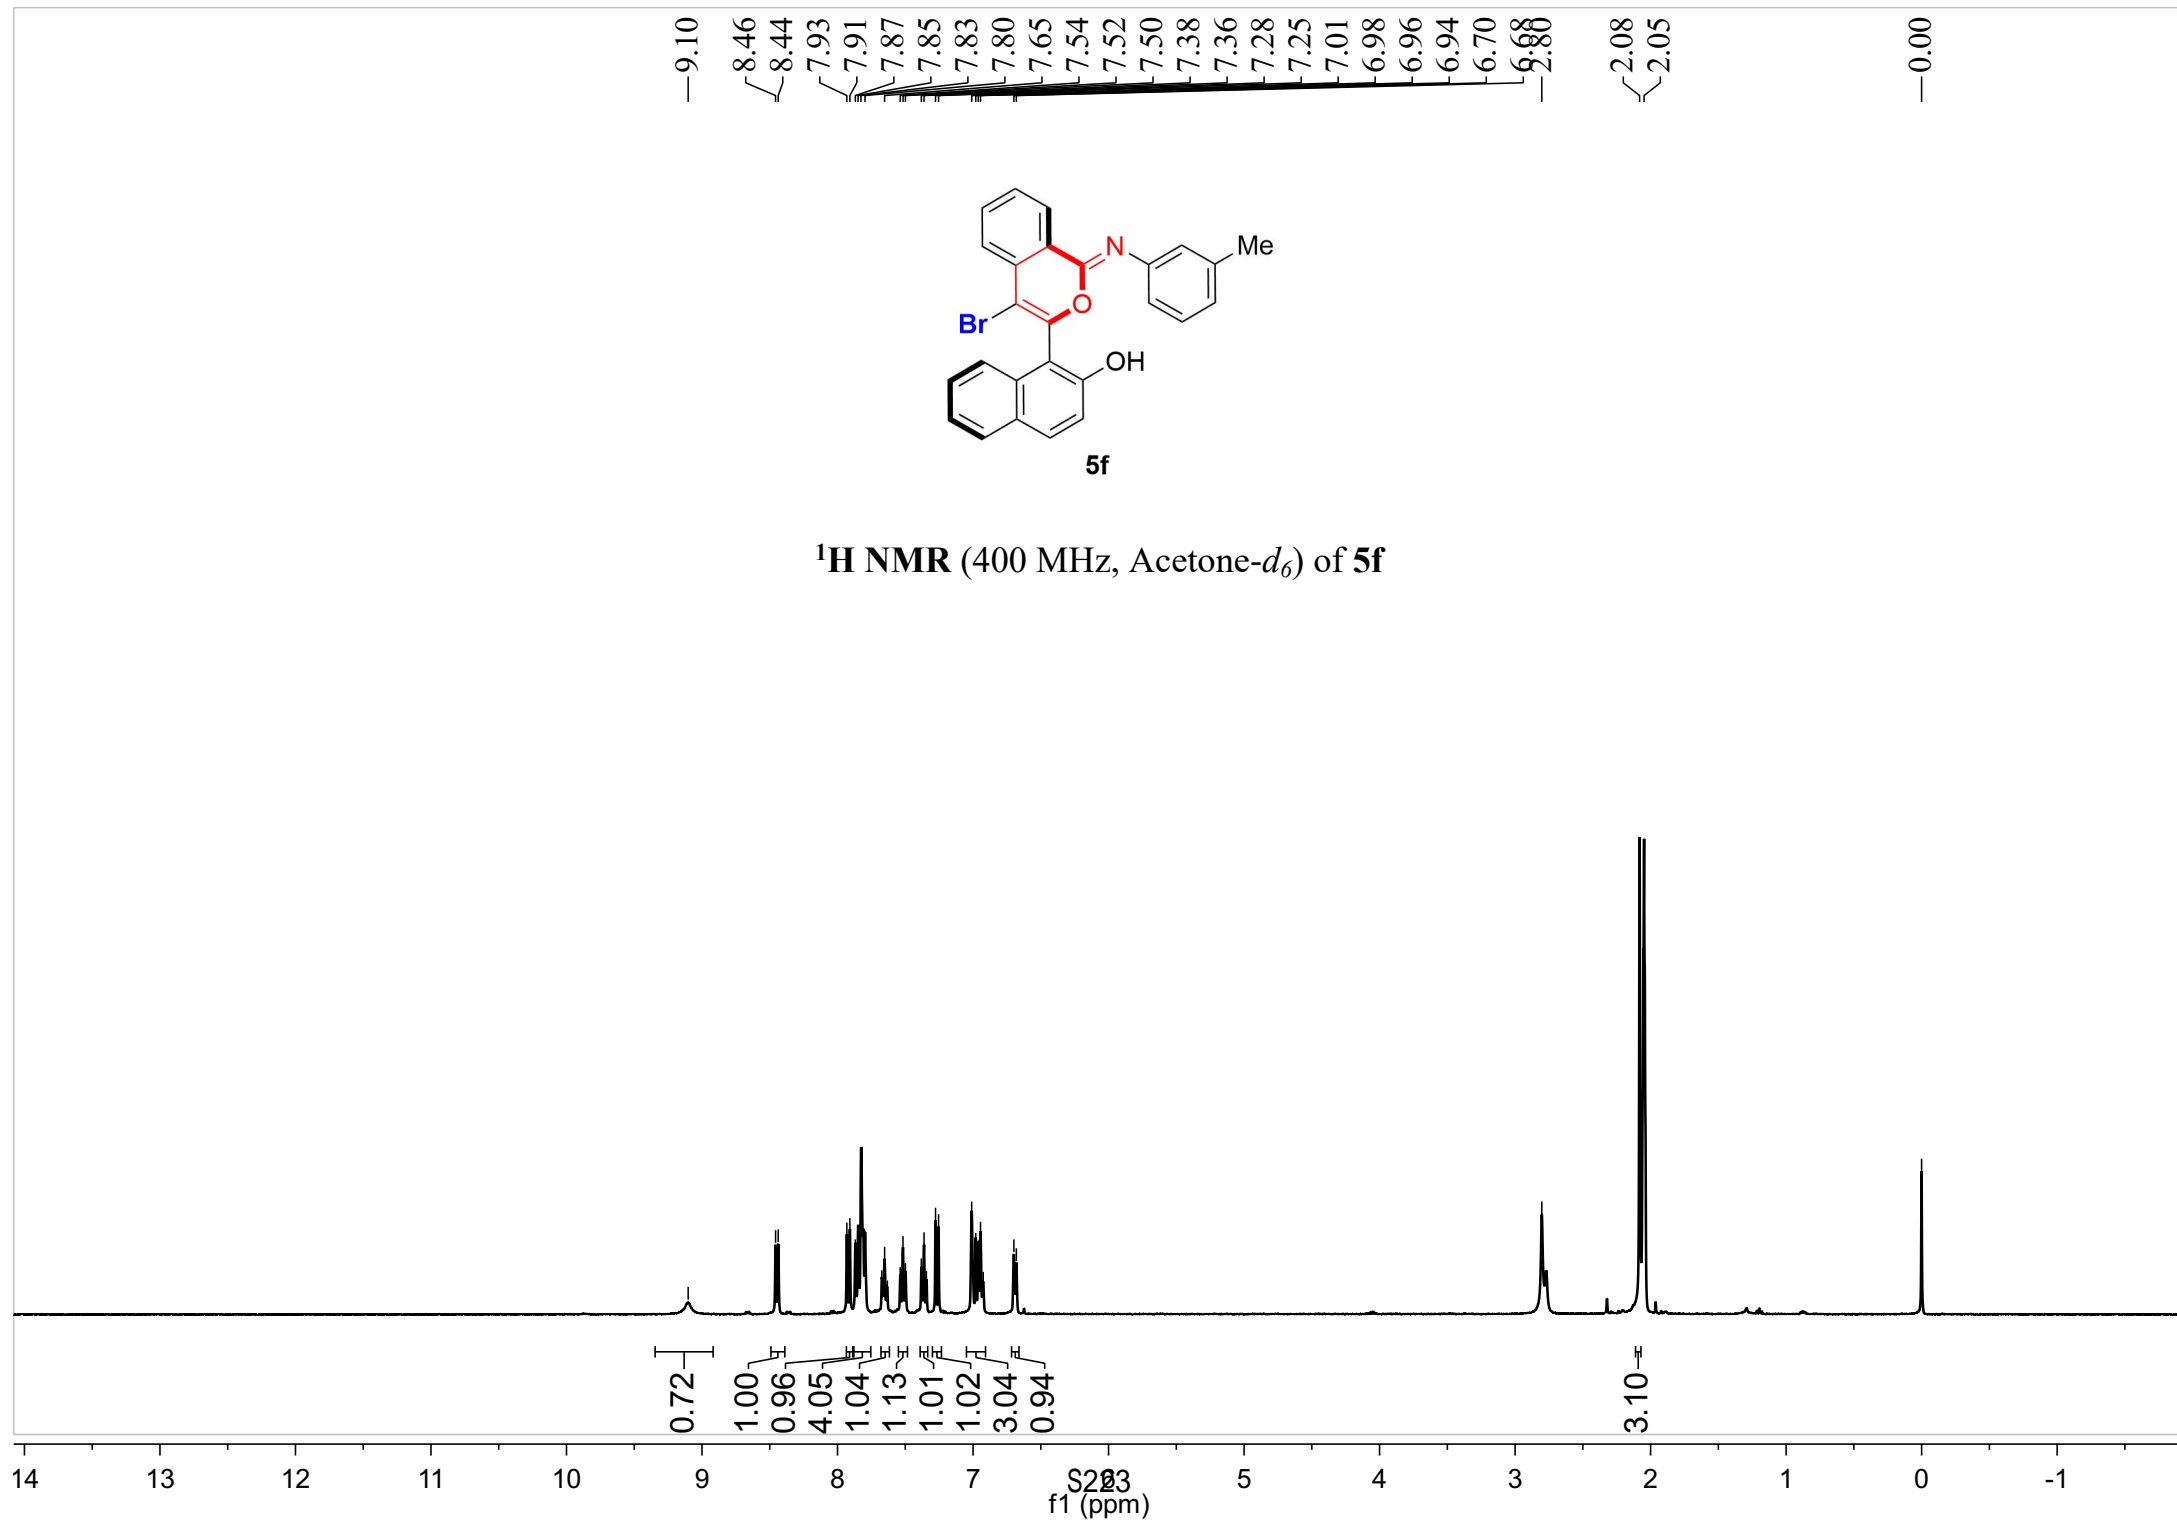

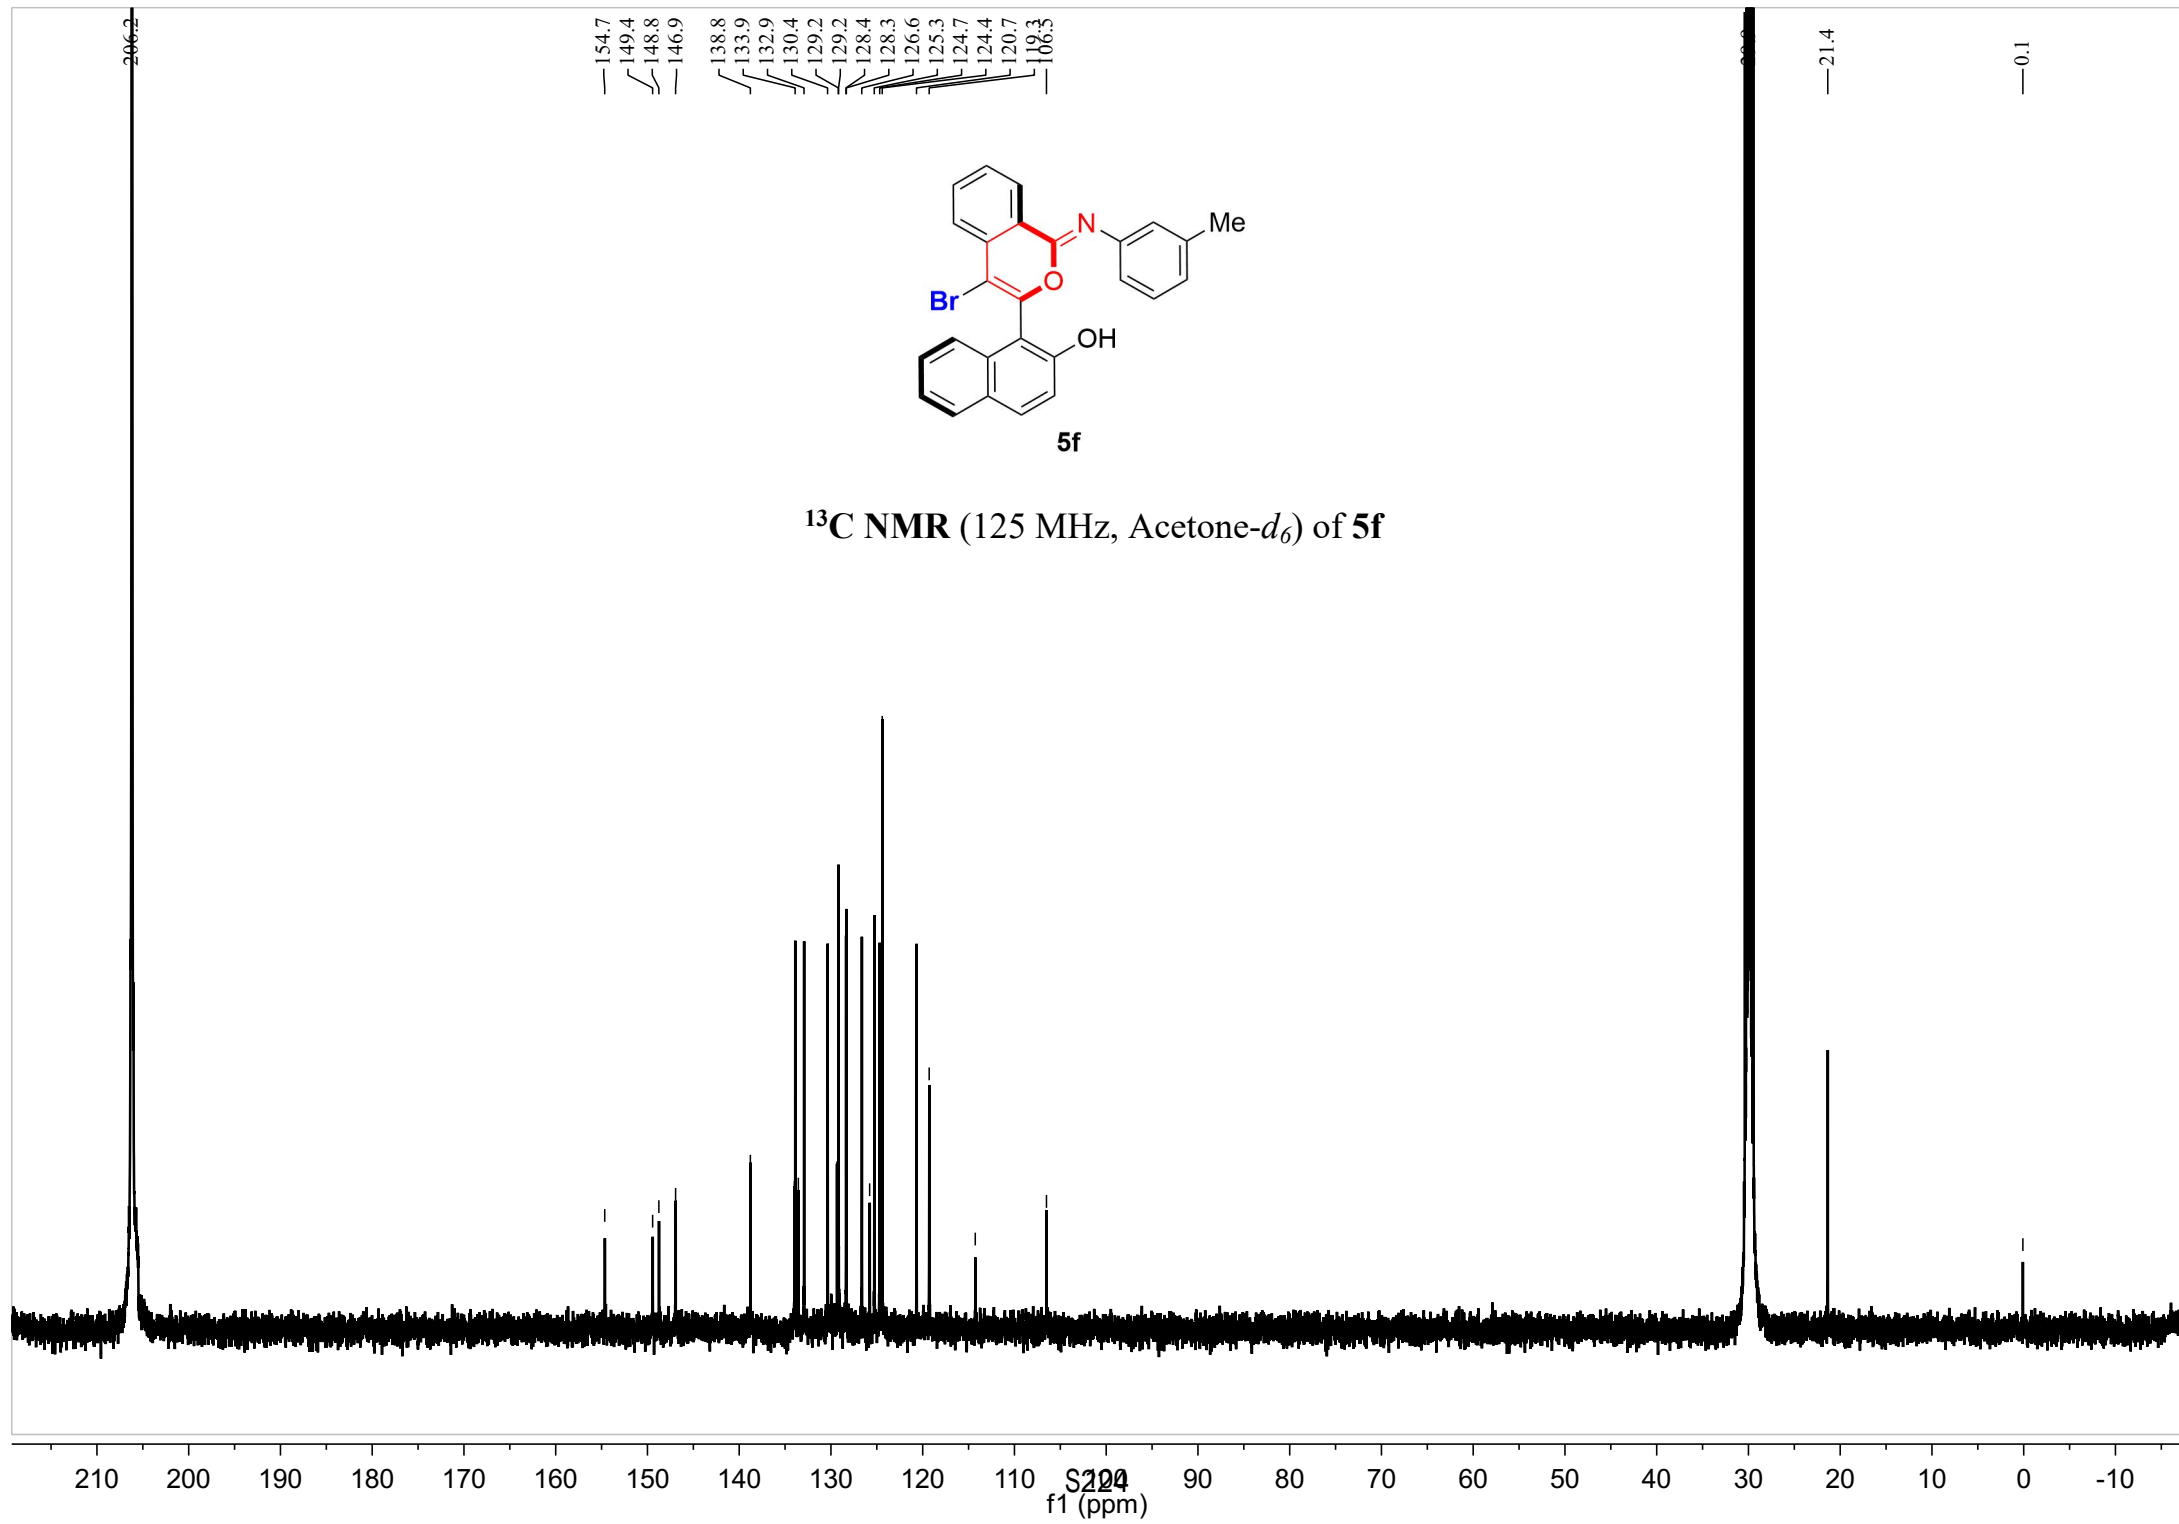



9.17  
8.47  
8.45  
7.94  
7.92  
7.87  
7.85  
7.83  
7.82  
7.80  
7.69  
7.67  
7.49  
7.38  
7.36  
7.30  
7.28  
7.24  
7.12  
7.11  
6.92  
6.91  
6.89  
6.89  
2.05  
0.00

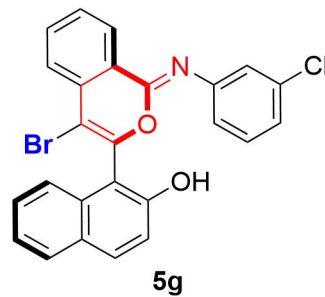

<sup>1</sup>H NMR (400 MHz, Acetone-d<sub>6</sub>) of **5g**

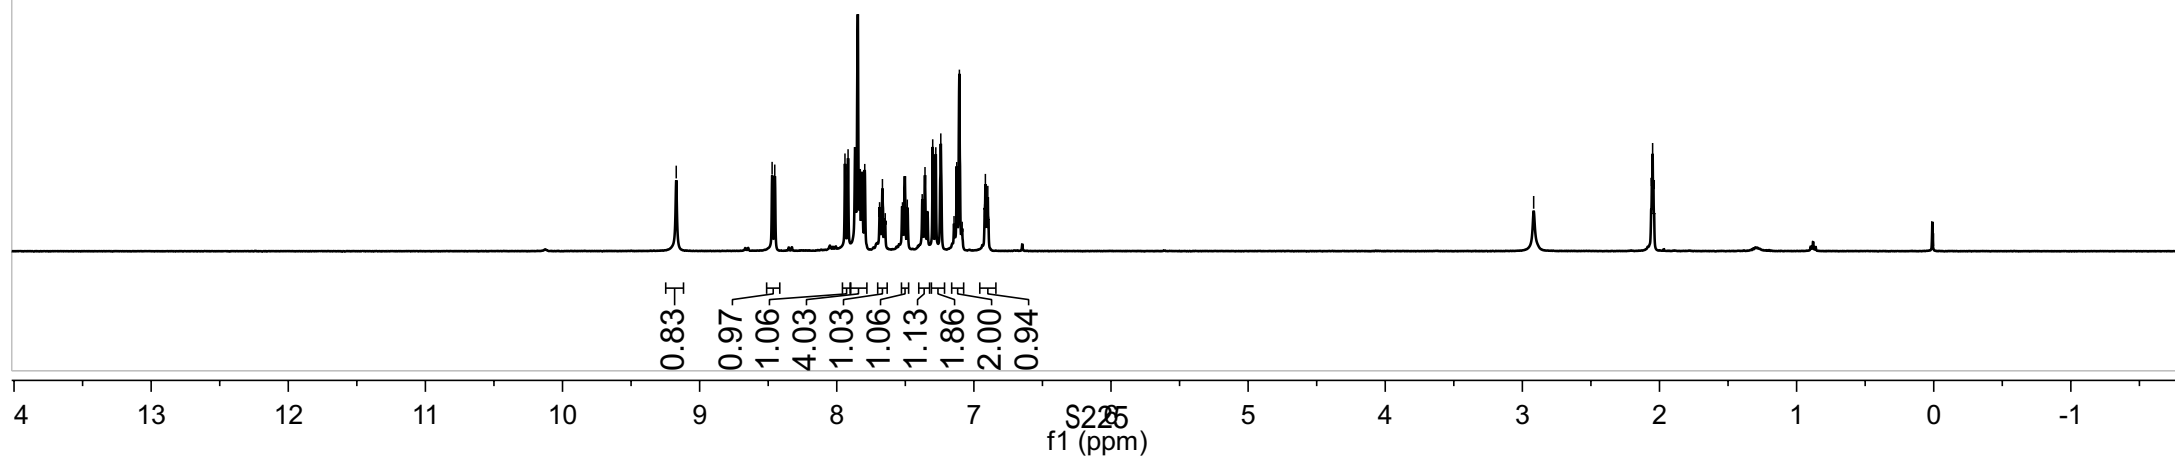

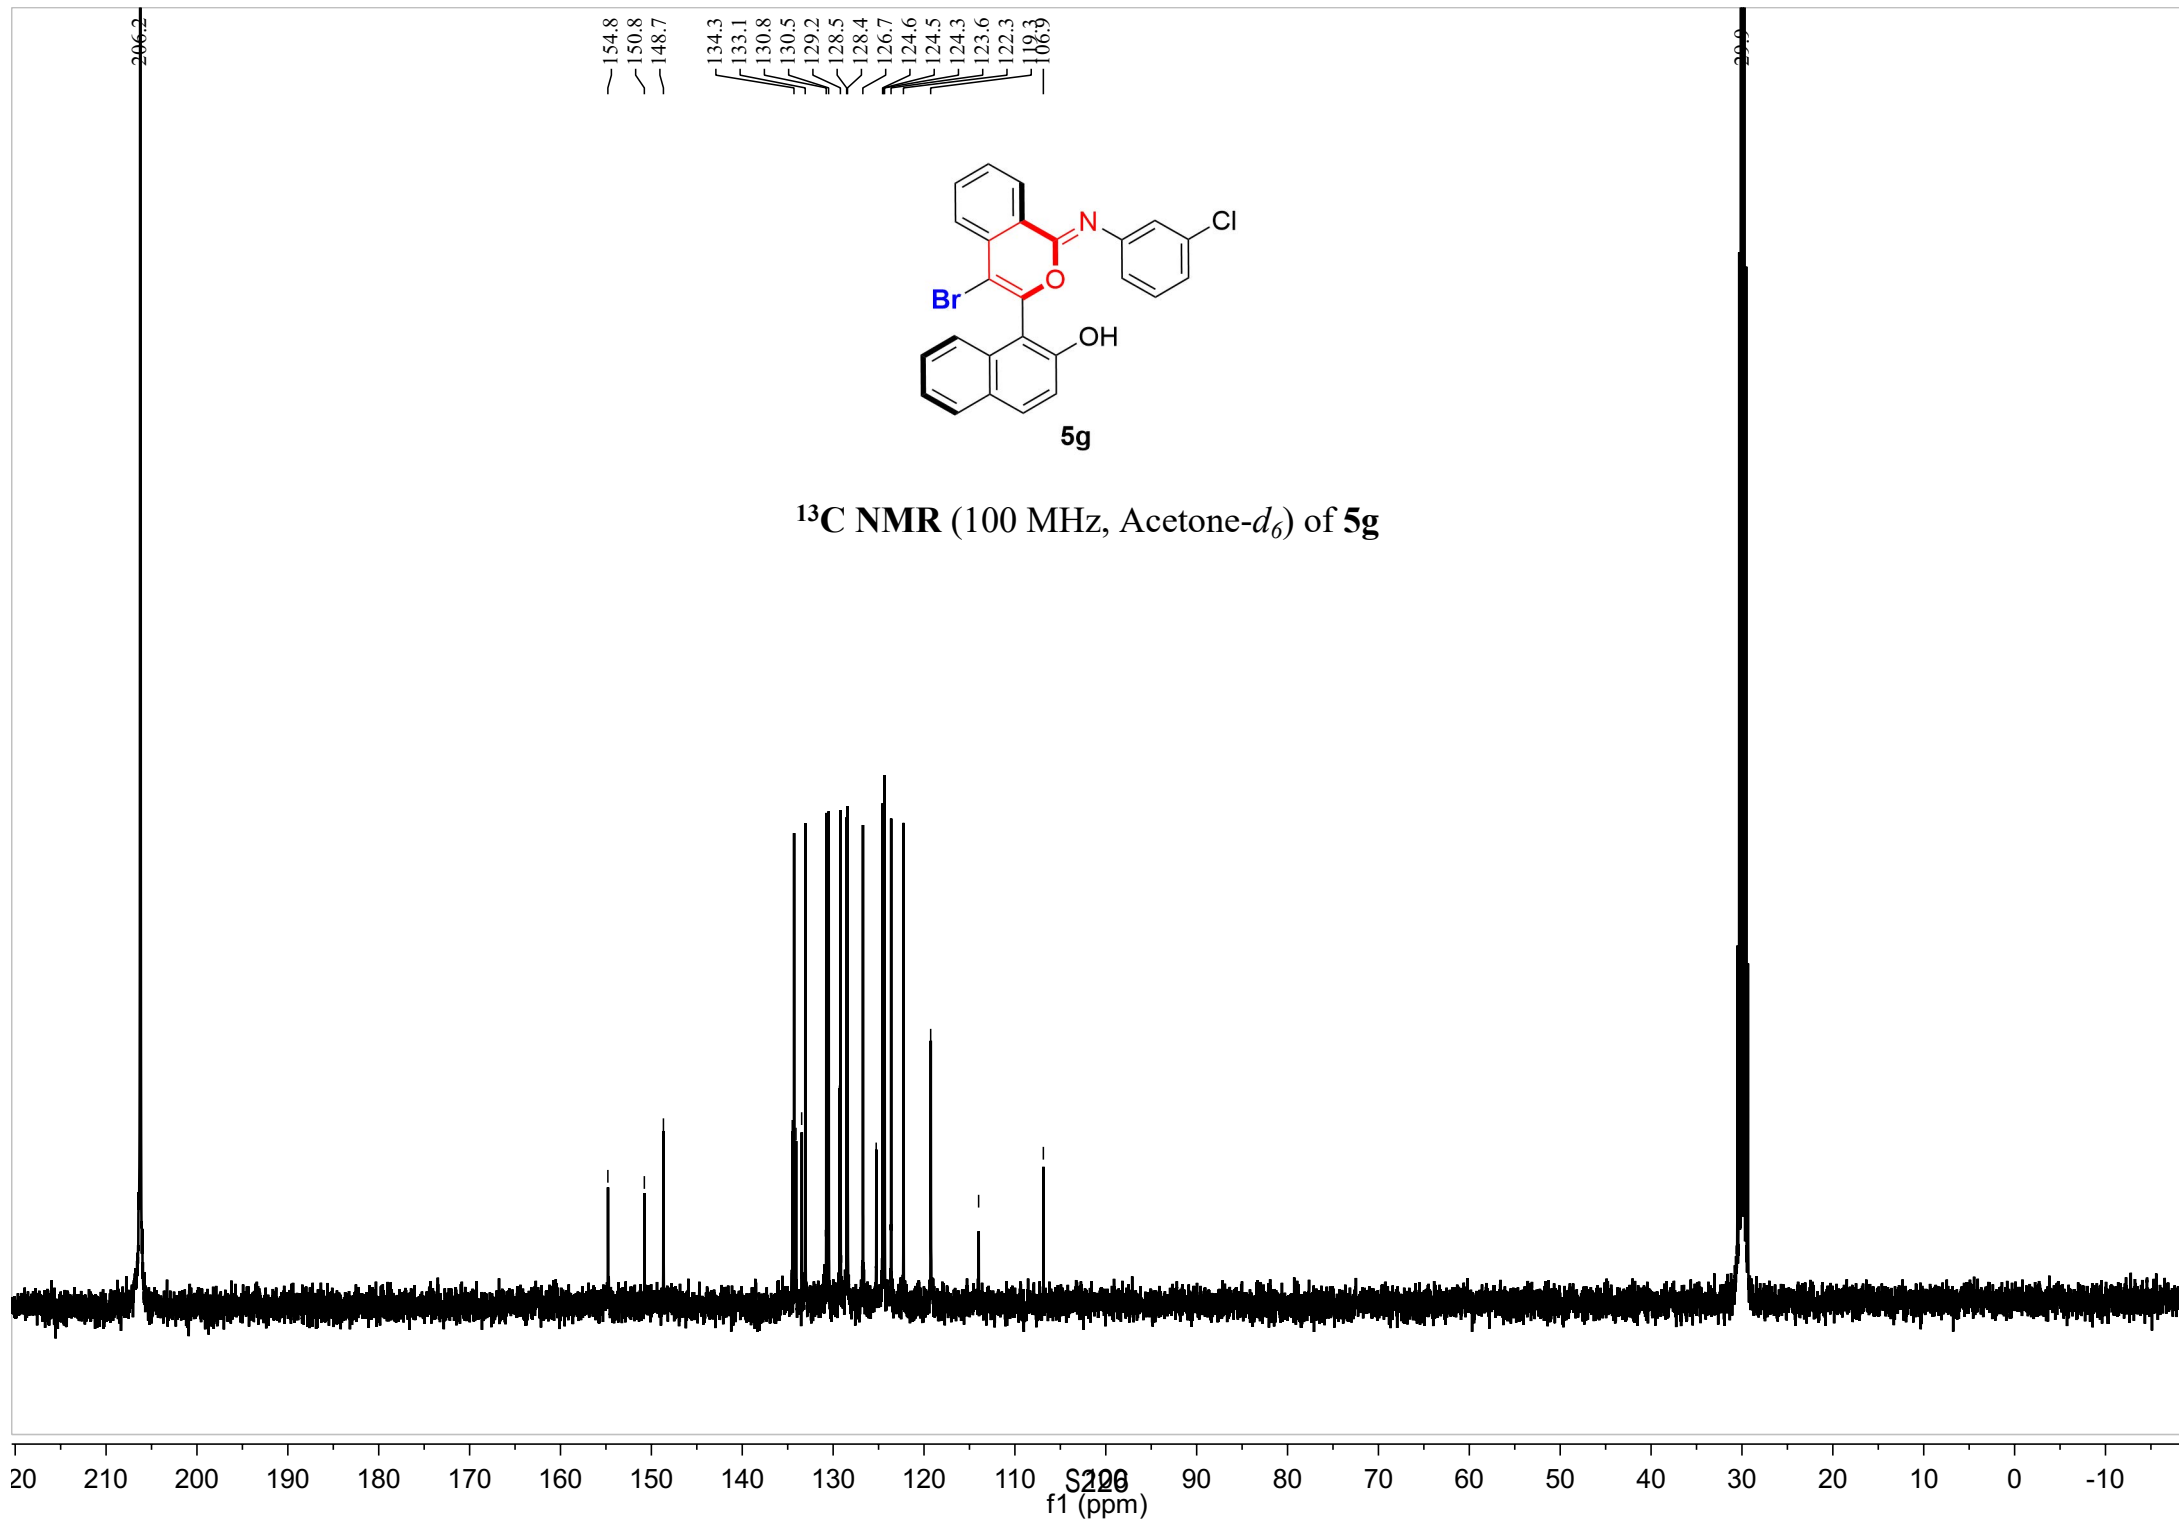

9.17  
8.47  
8.45  
7.94  
7.92  
7.87  
7.85  
7.82  
7.80  
7.78  
7.64  
7.49  
7.47  
7.37  
7.35  
7.30  
7.28  
7.25  
7.24  
7.22  
6.90  
6.88  
6.87

2.05

0.01

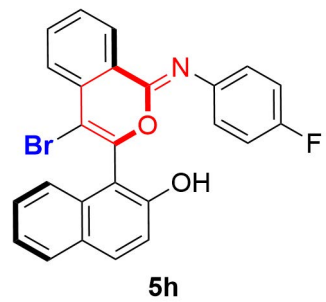

<sup>1</sup>H NMR (400 MHz, Acetone-d<sub>6</sub>) of 5h

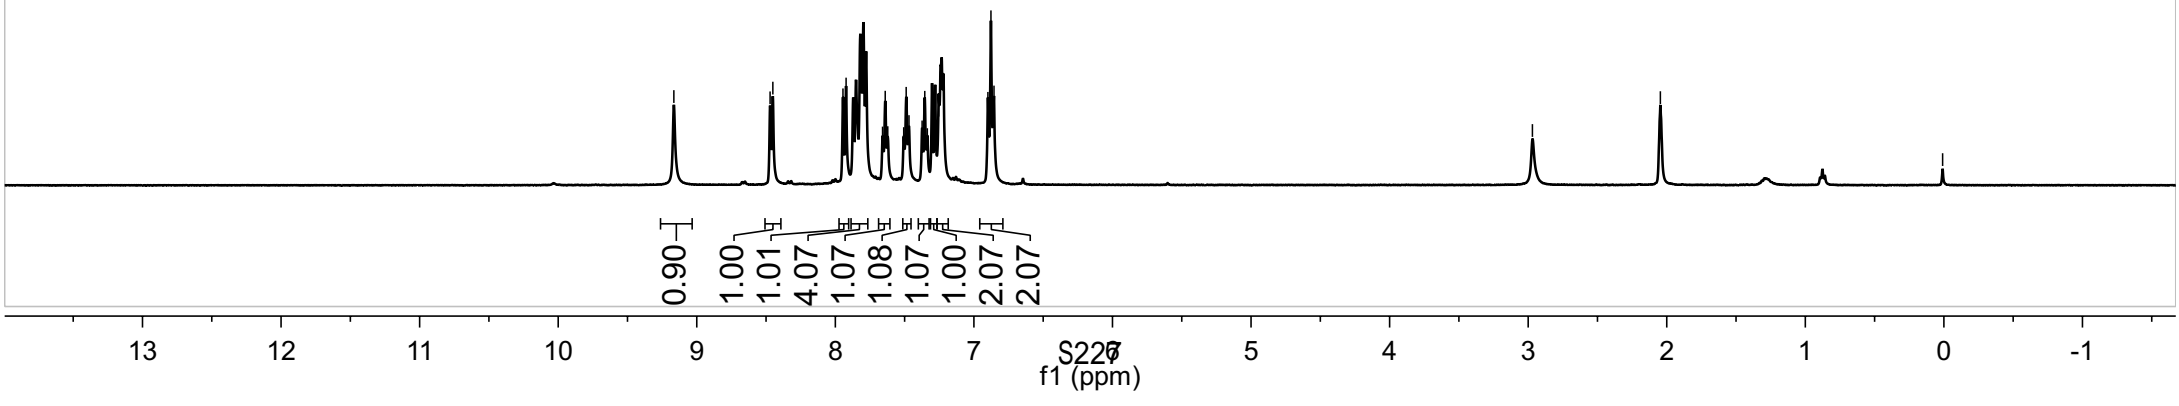

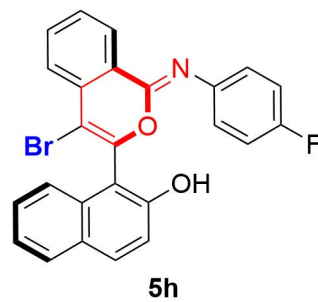

**<sup>19</sup>F NMR (376 MHz, Acetone-*d*<sub>6</sub>) of 5h**

— -120.82

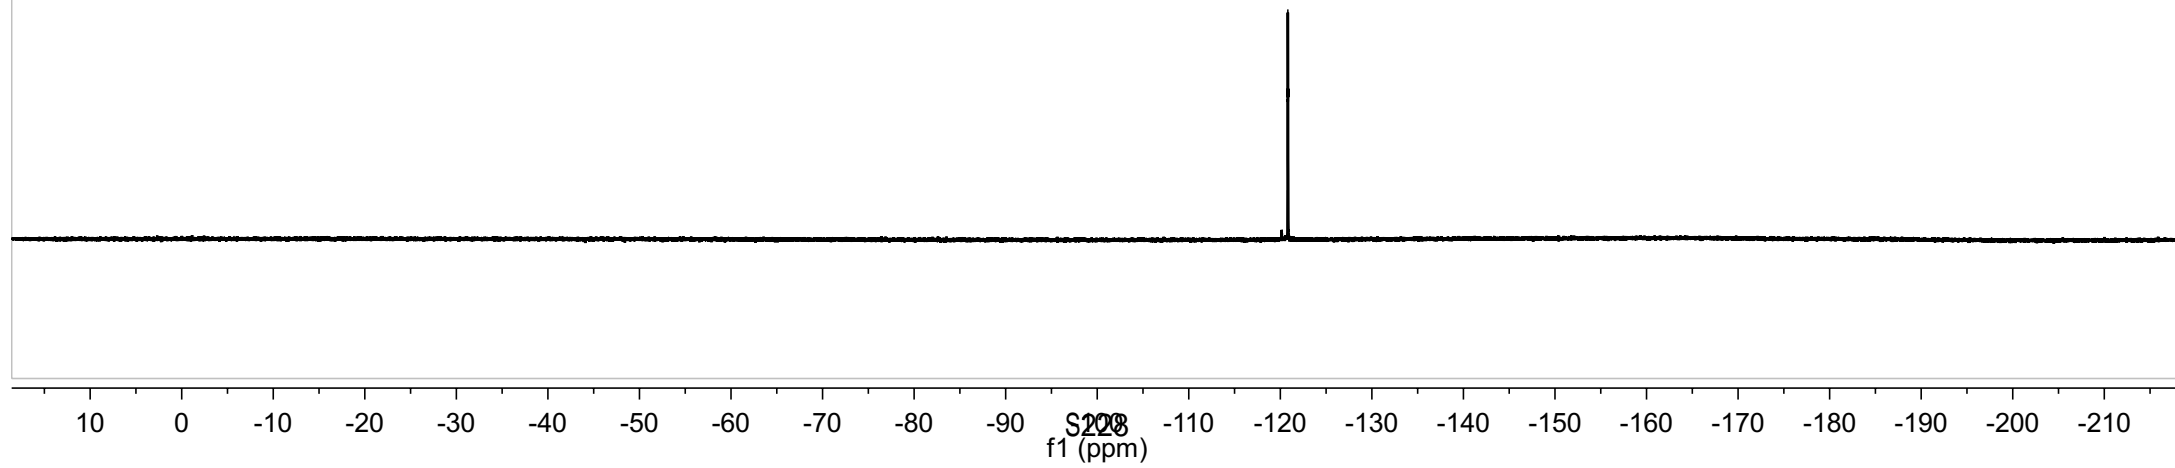

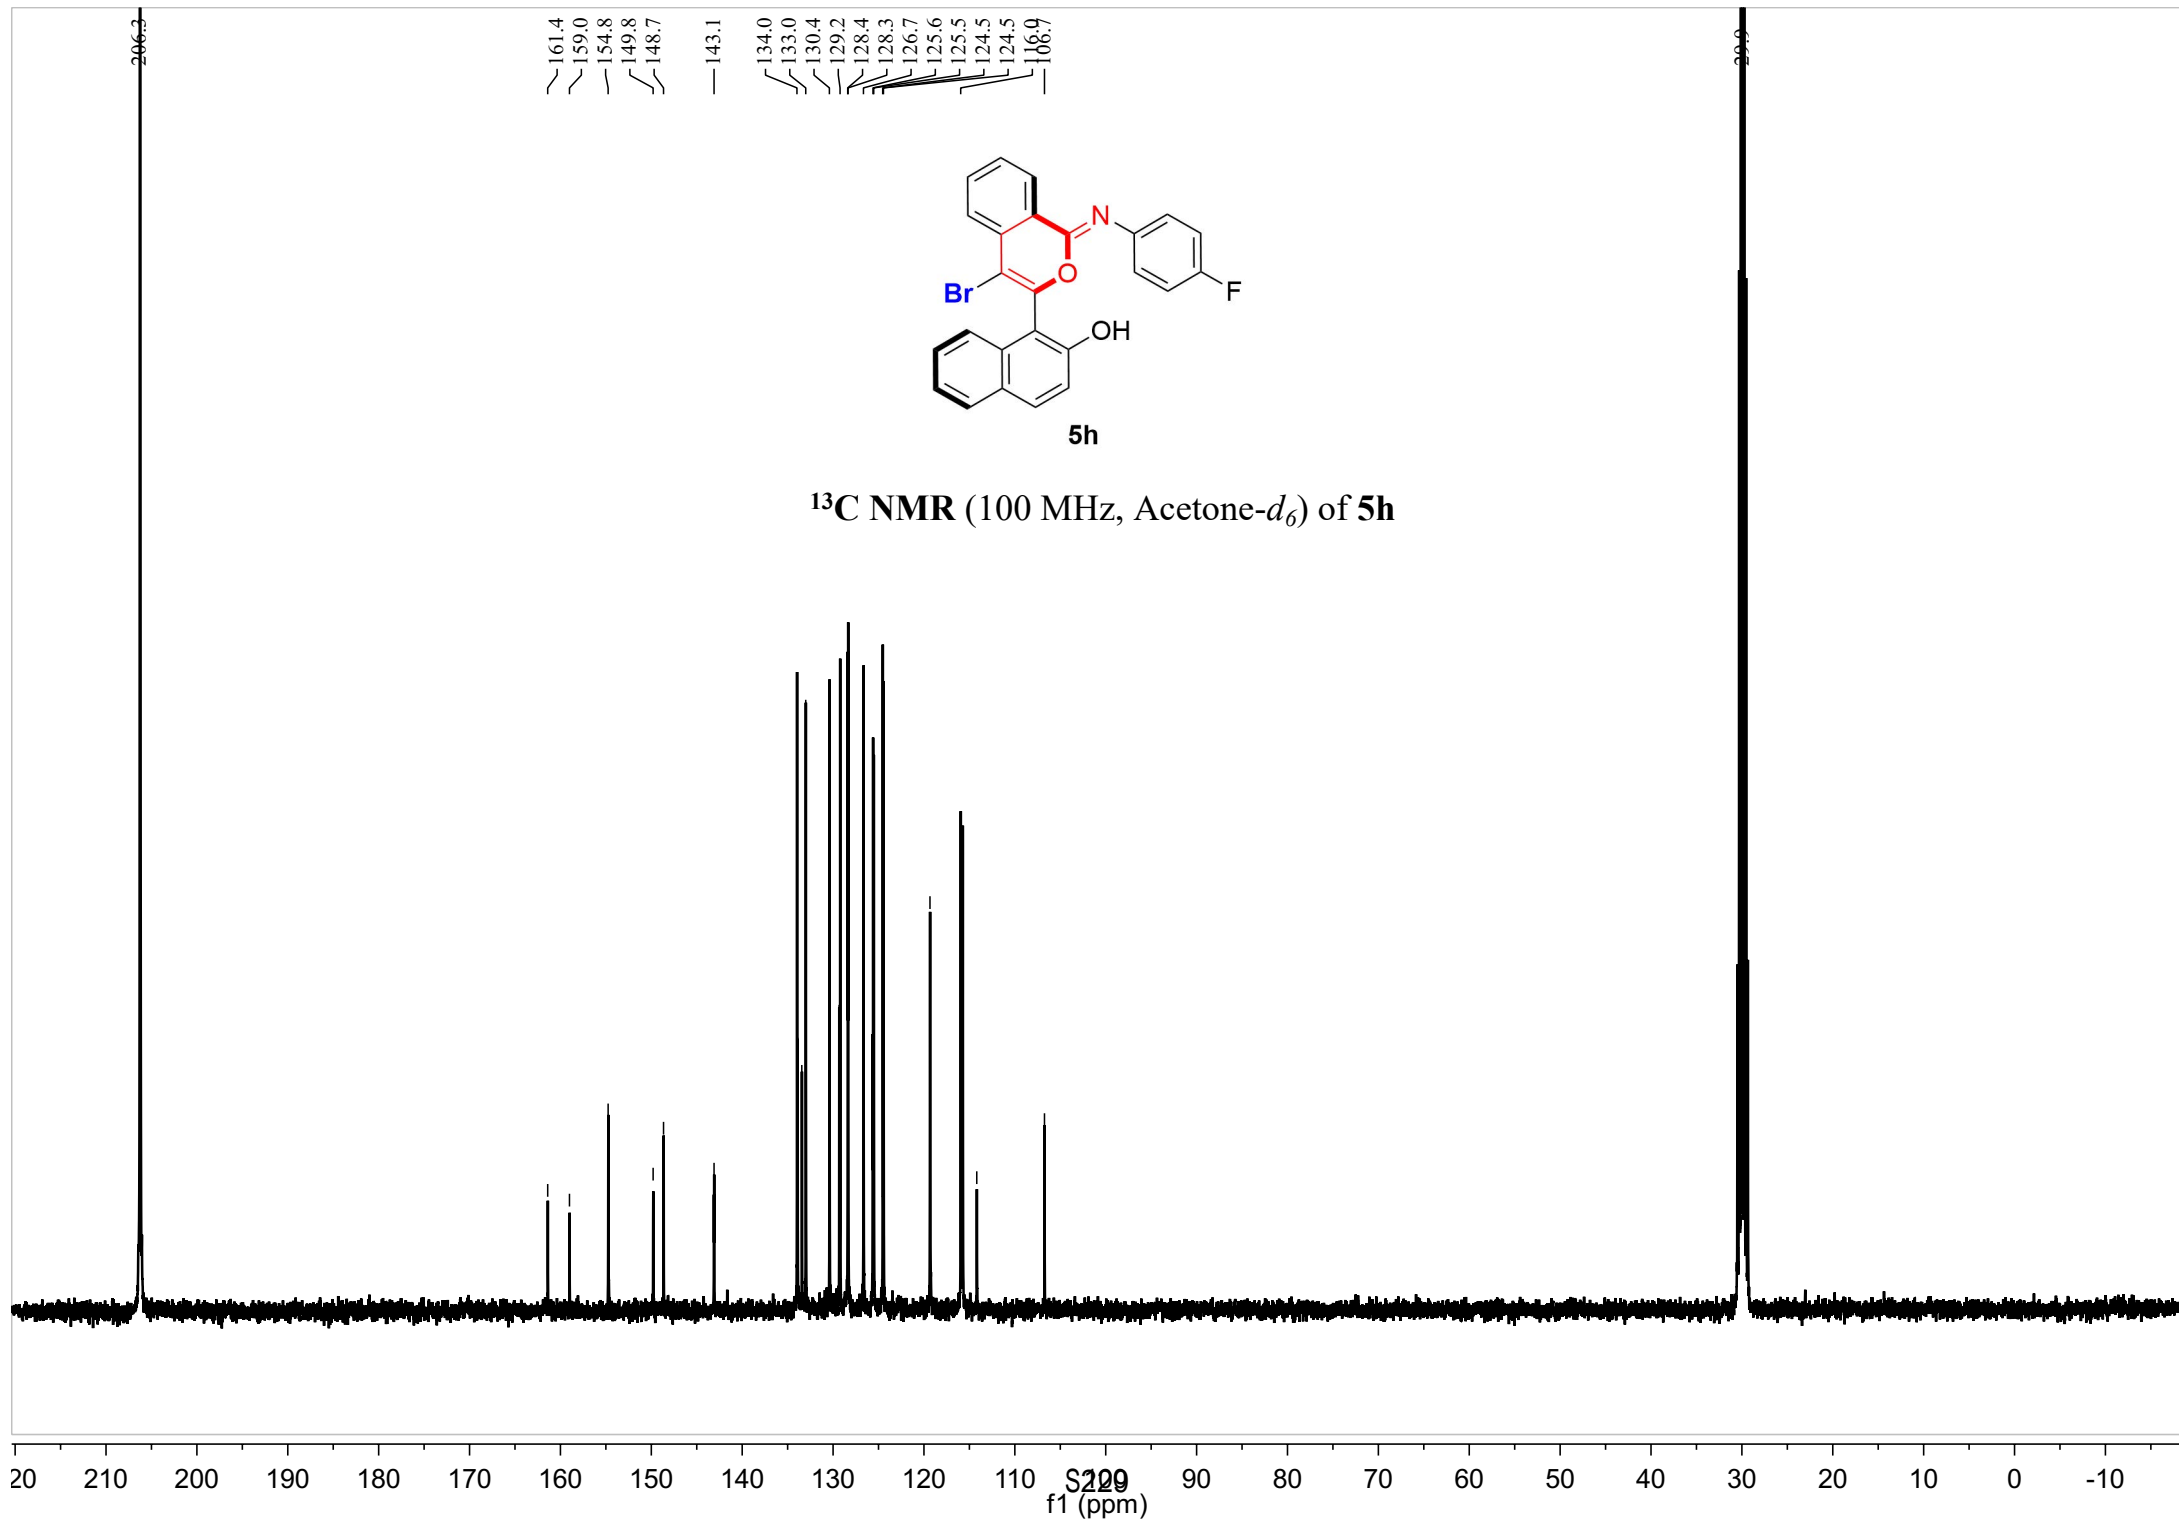

9.14  
8.47  
8.45  
7.94  
7.92  
7.87  
7.85  
7.84  
7.82  
7.80  
7.78  
7.51  
7.49  
7.47  
7.38  
7.36  
7.34  
7.29  
7.27  
7.20  
7.18  
7.13  
7.11  
2.89

2.05

0.01

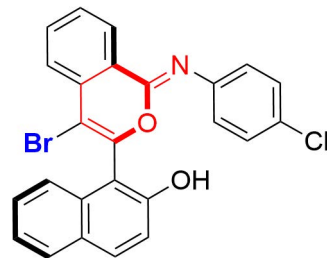

**5i**

<sup>1</sup>H NMR (400 MHz, Acetone-*d*<sub>6</sub>) of **5i**

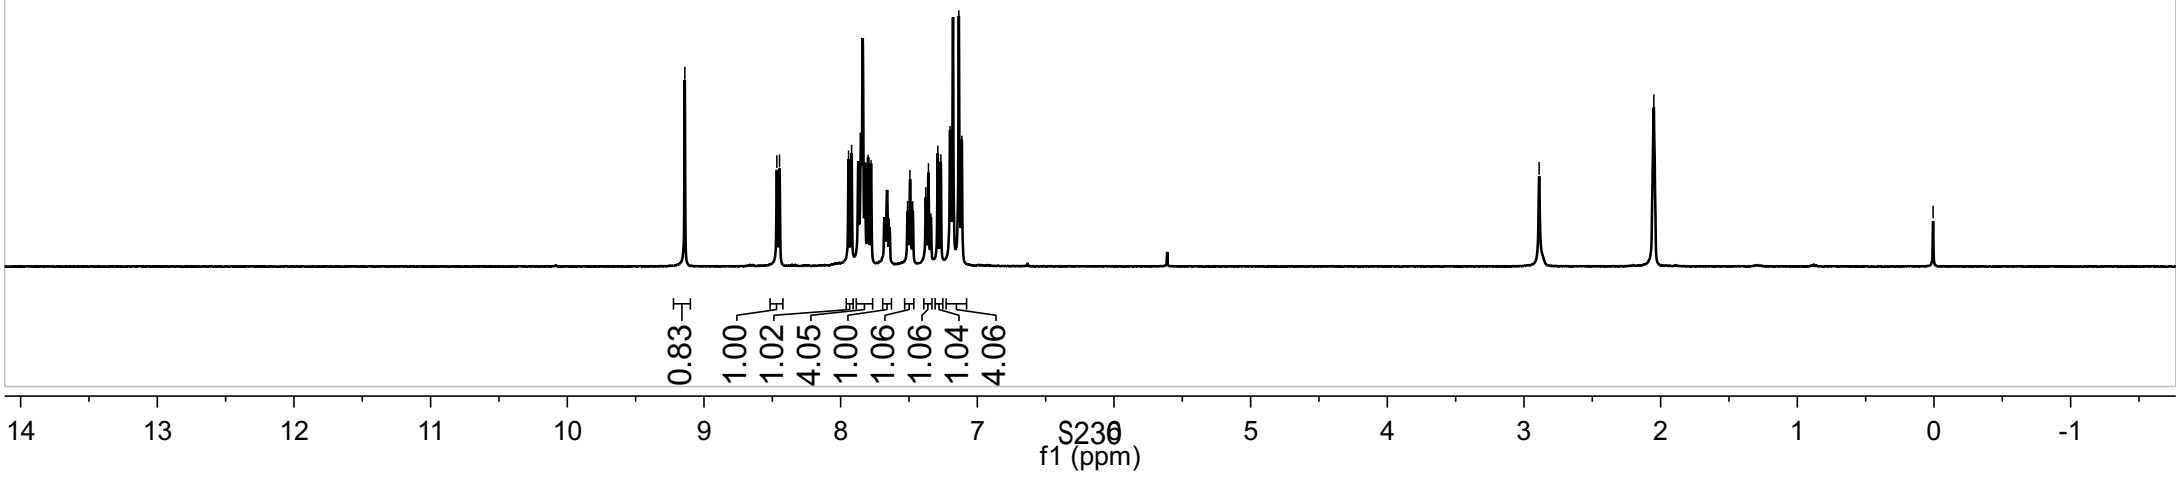

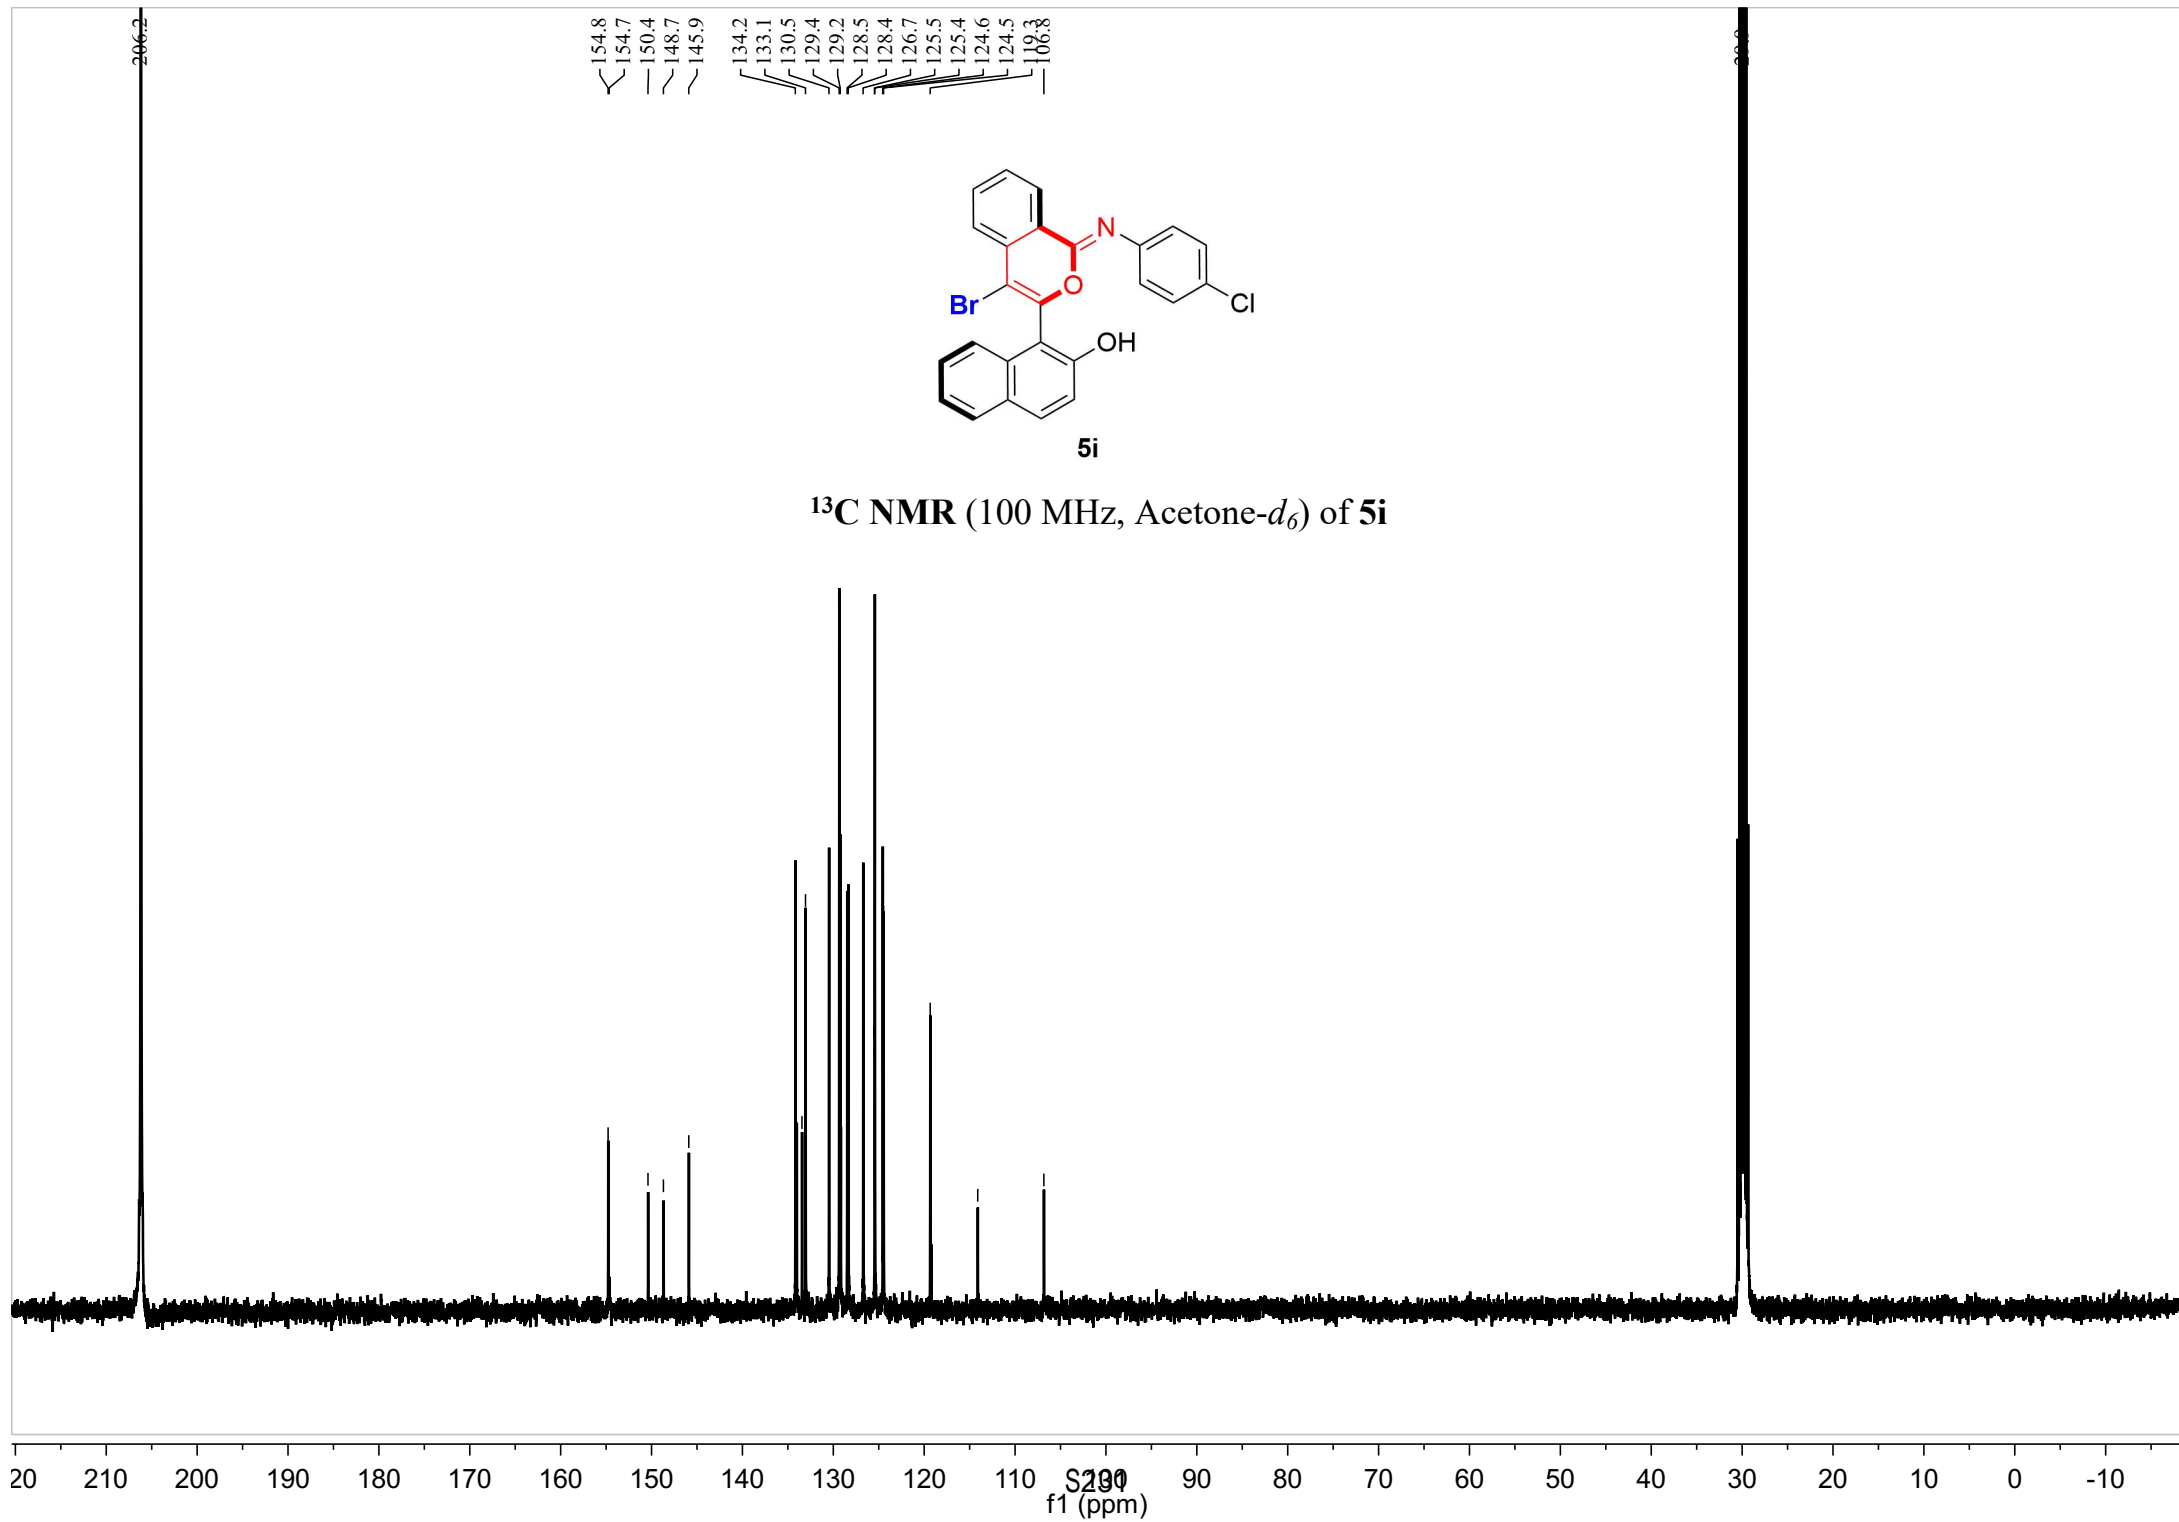

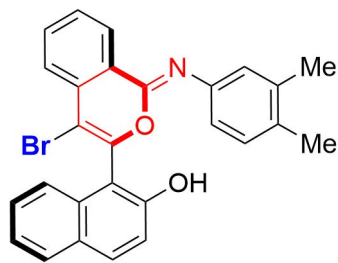

**5j**

**<sup>1</sup>H NMR (400 MHz, Acetone-*d*<sub>6</sub>) of **5j****

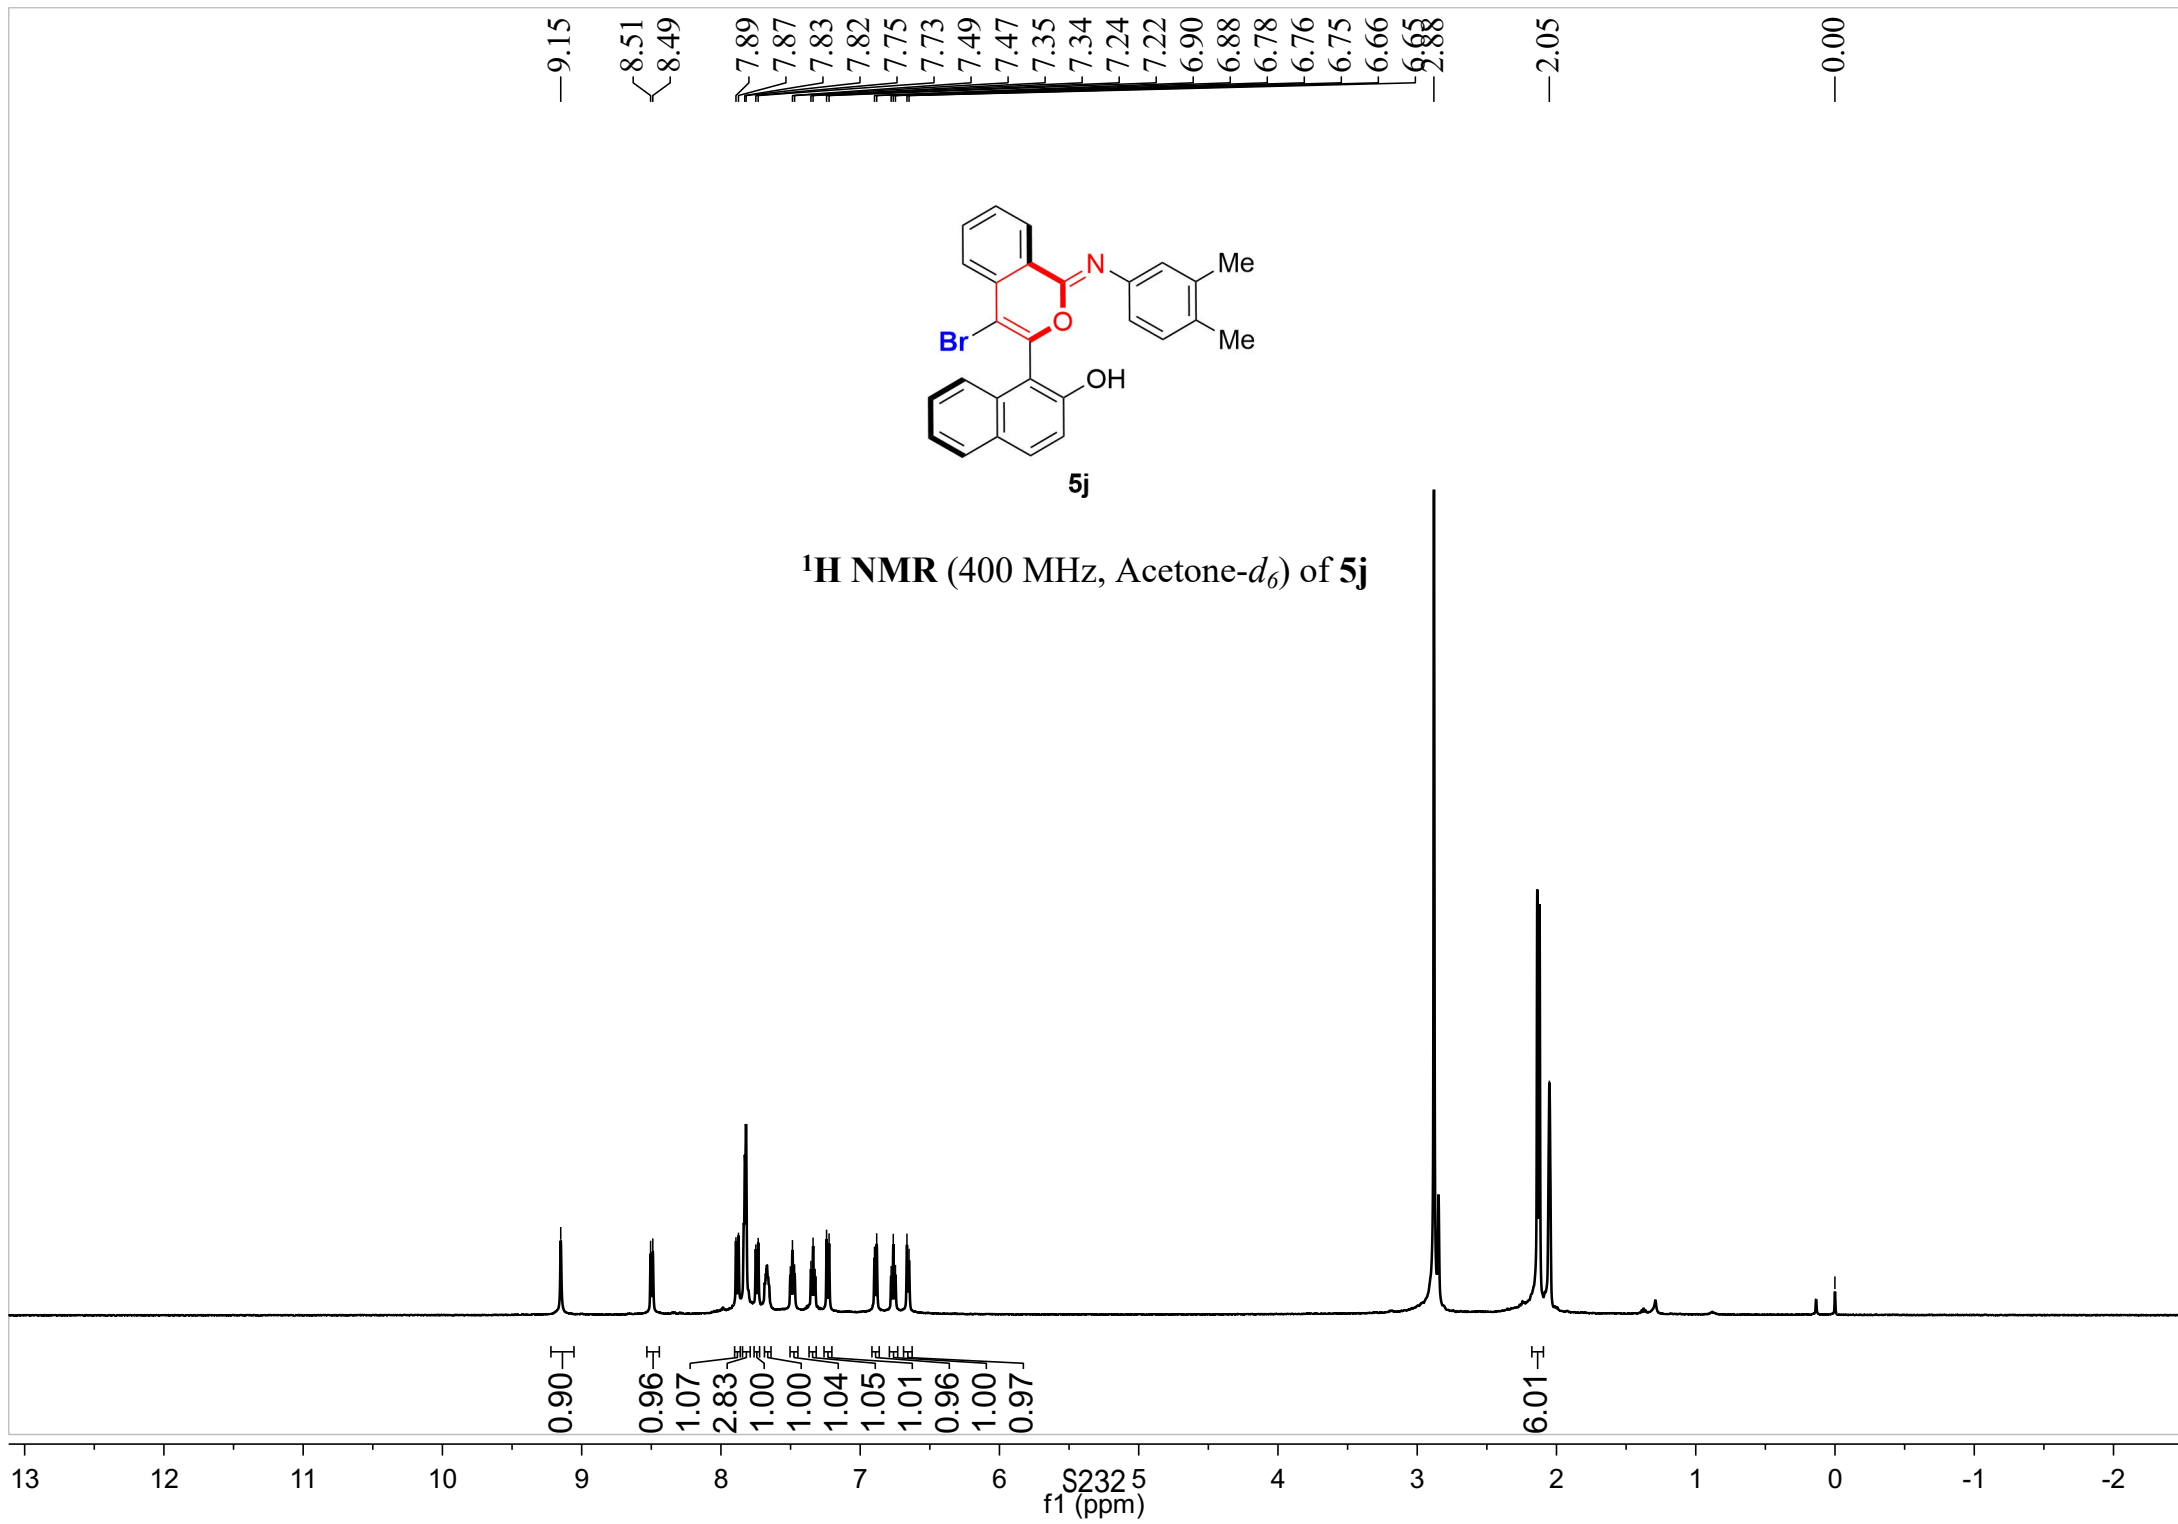



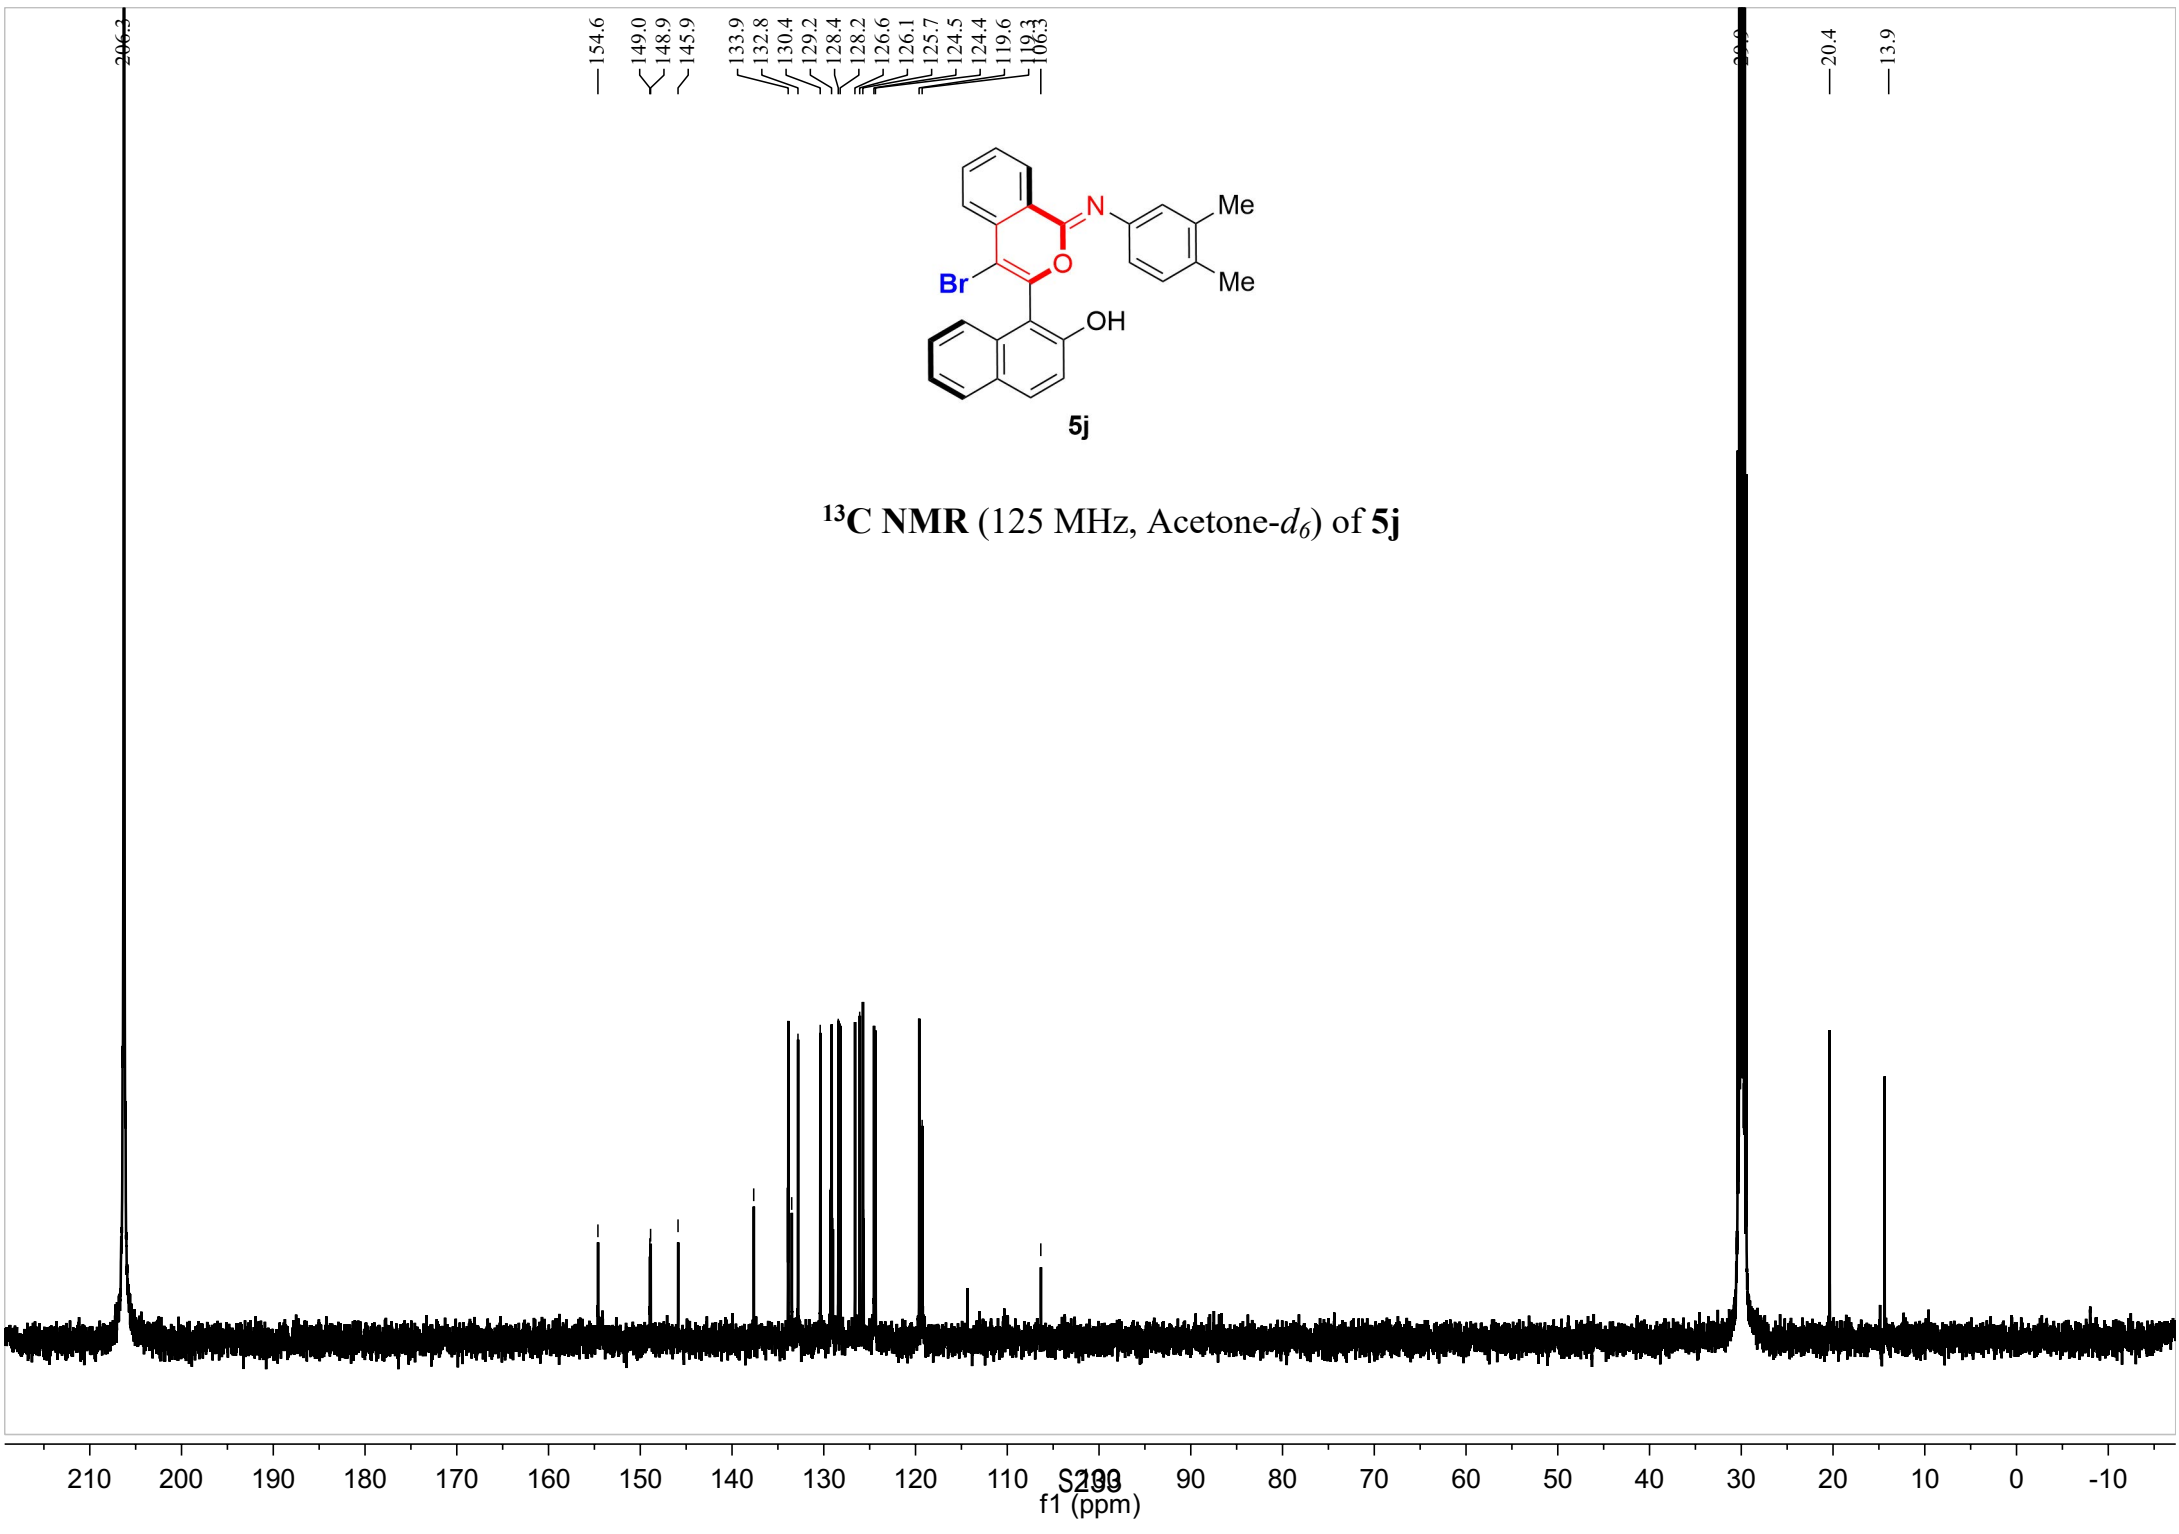

9.12  
8.50  
8.48  
7.90  
7.88  
7.82  
7.75  
7.73  
7.65  
7.49  
7.47  
7.45  
7.35  
7.33  
7.25  
7.23  
7.06  
7.05  
6.90  
6.89  
2.21  
2.05  
0.00

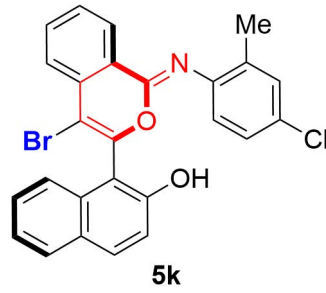

<sup>1</sup>H NMR (400 MHz, Acetone-*d*<sub>6</sub>) of 5k

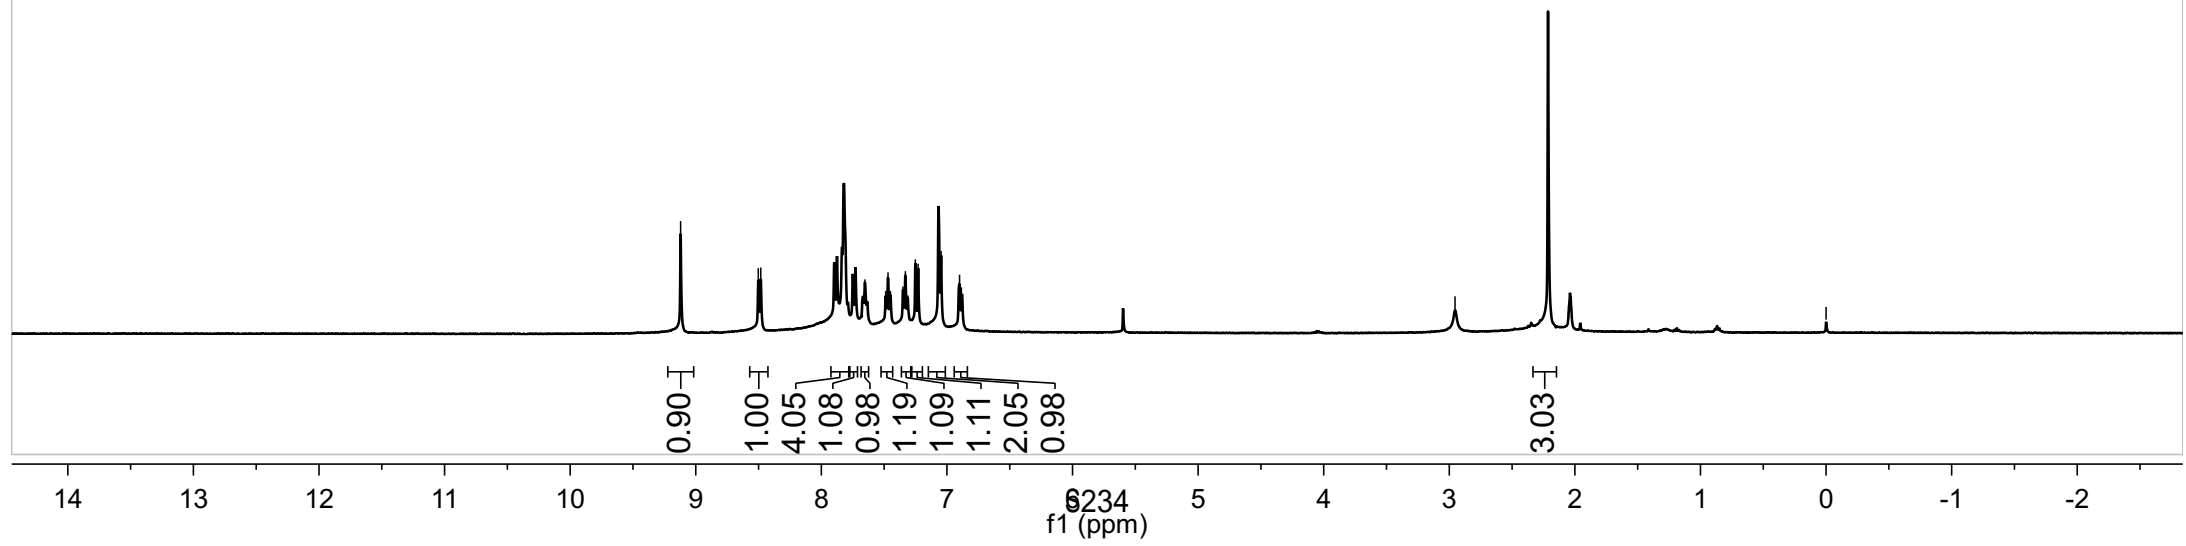

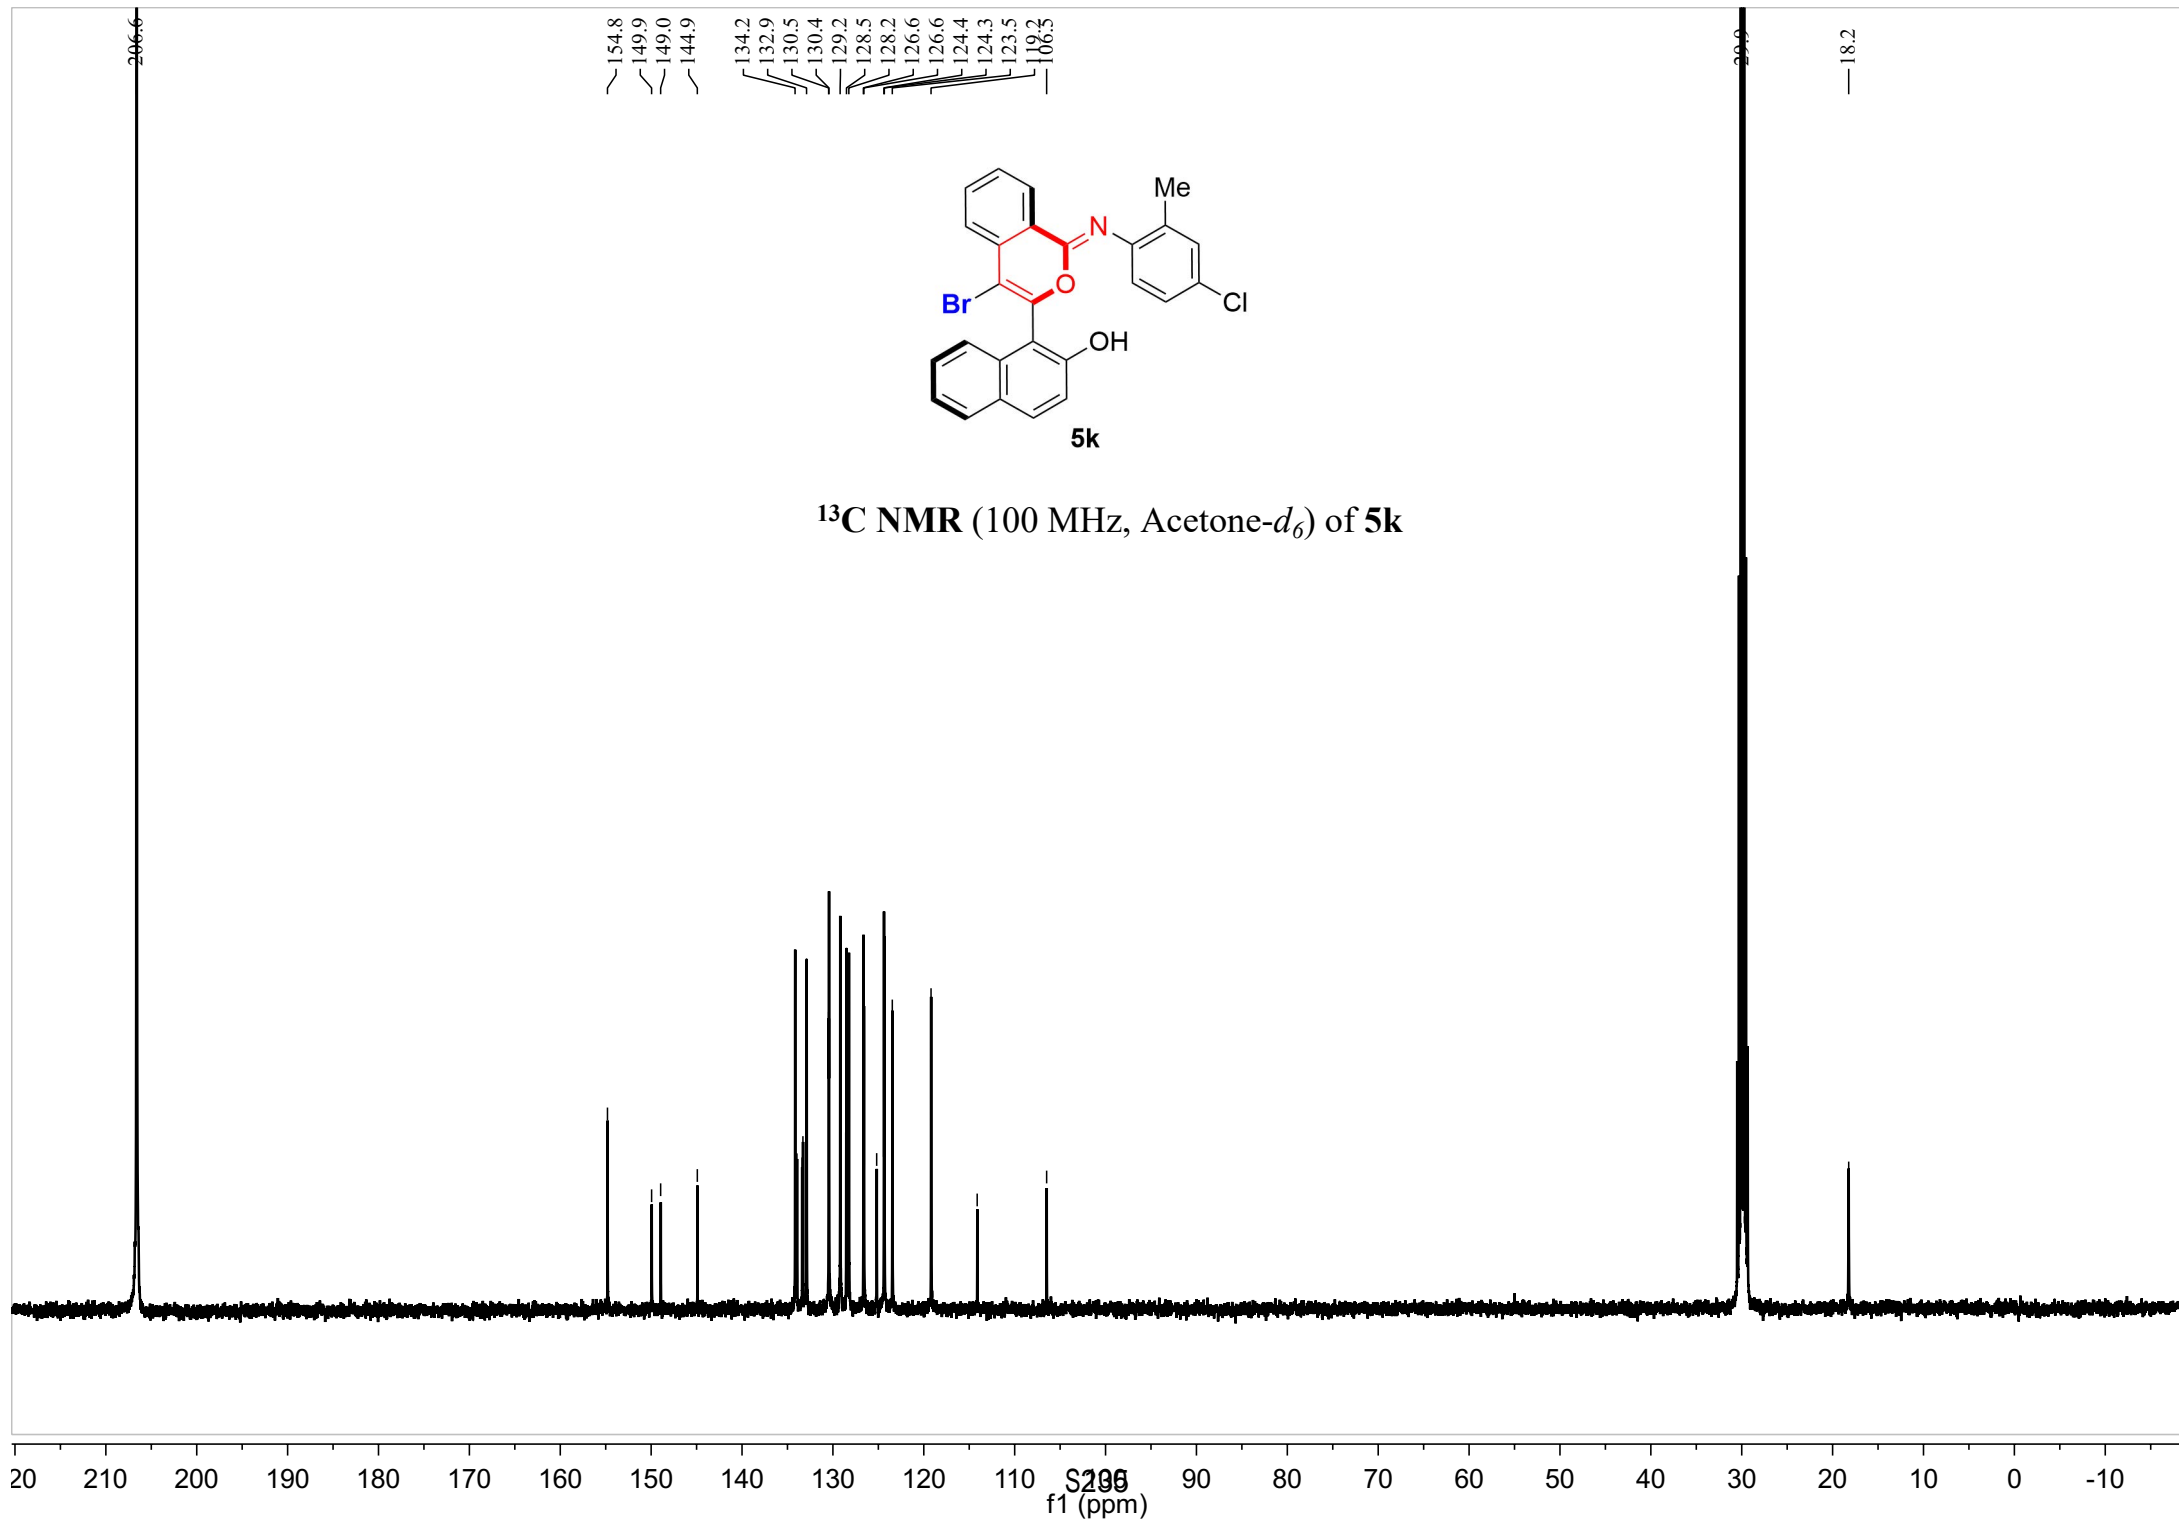

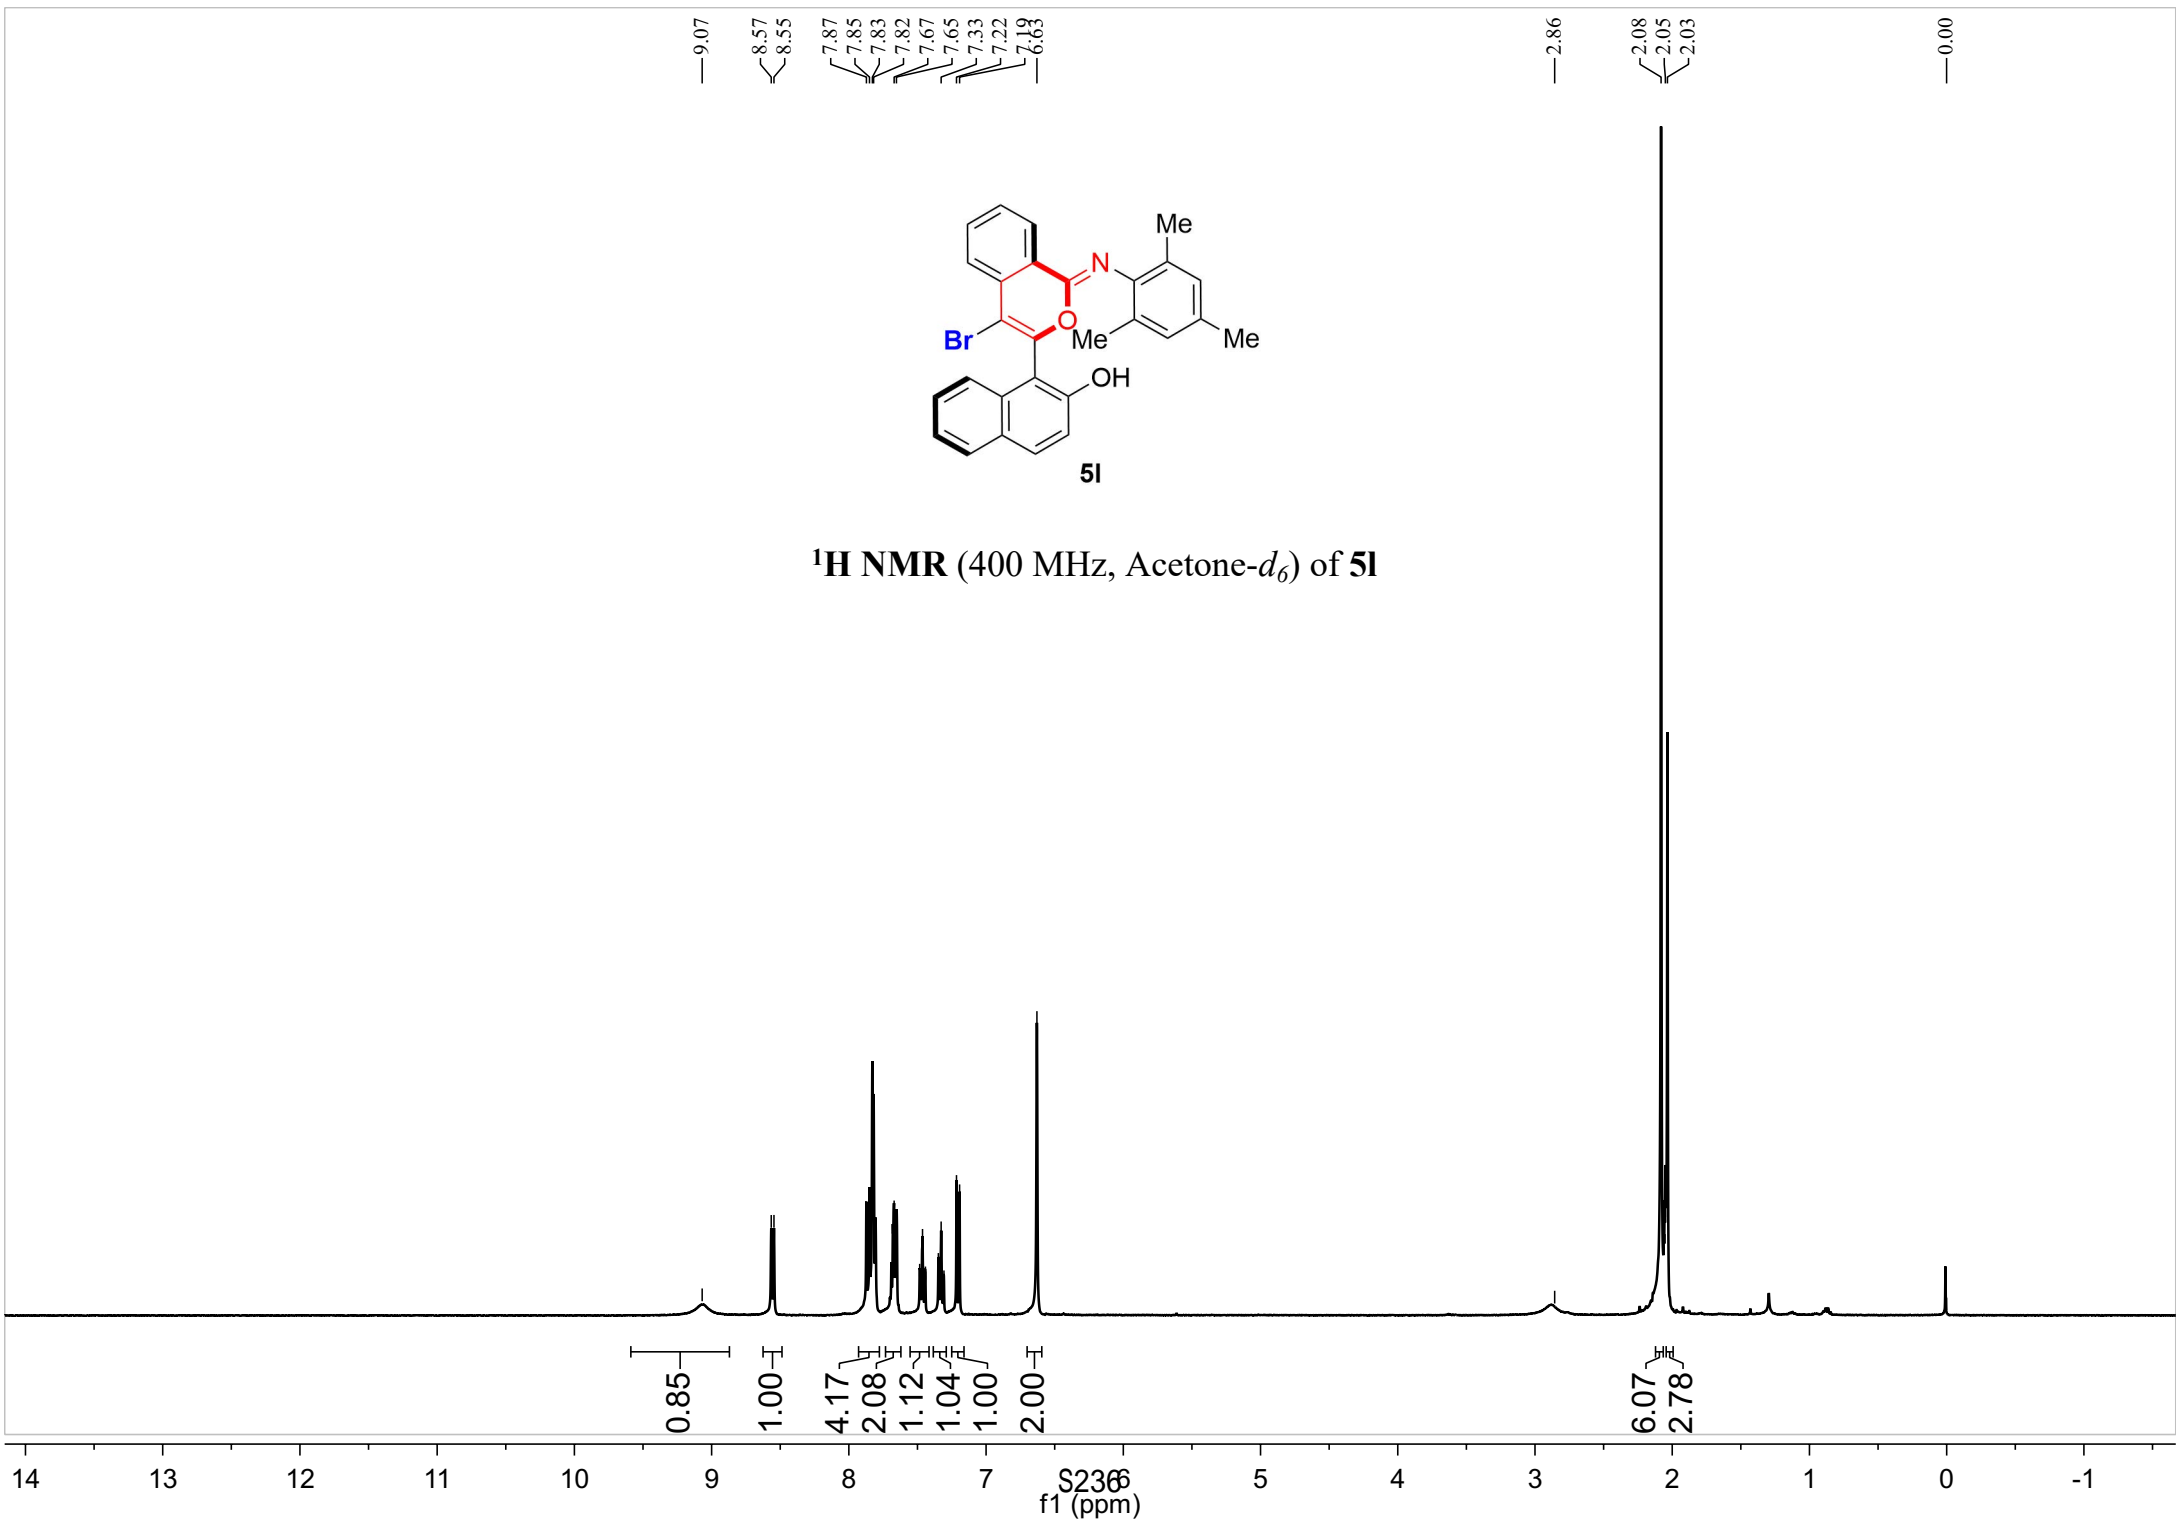

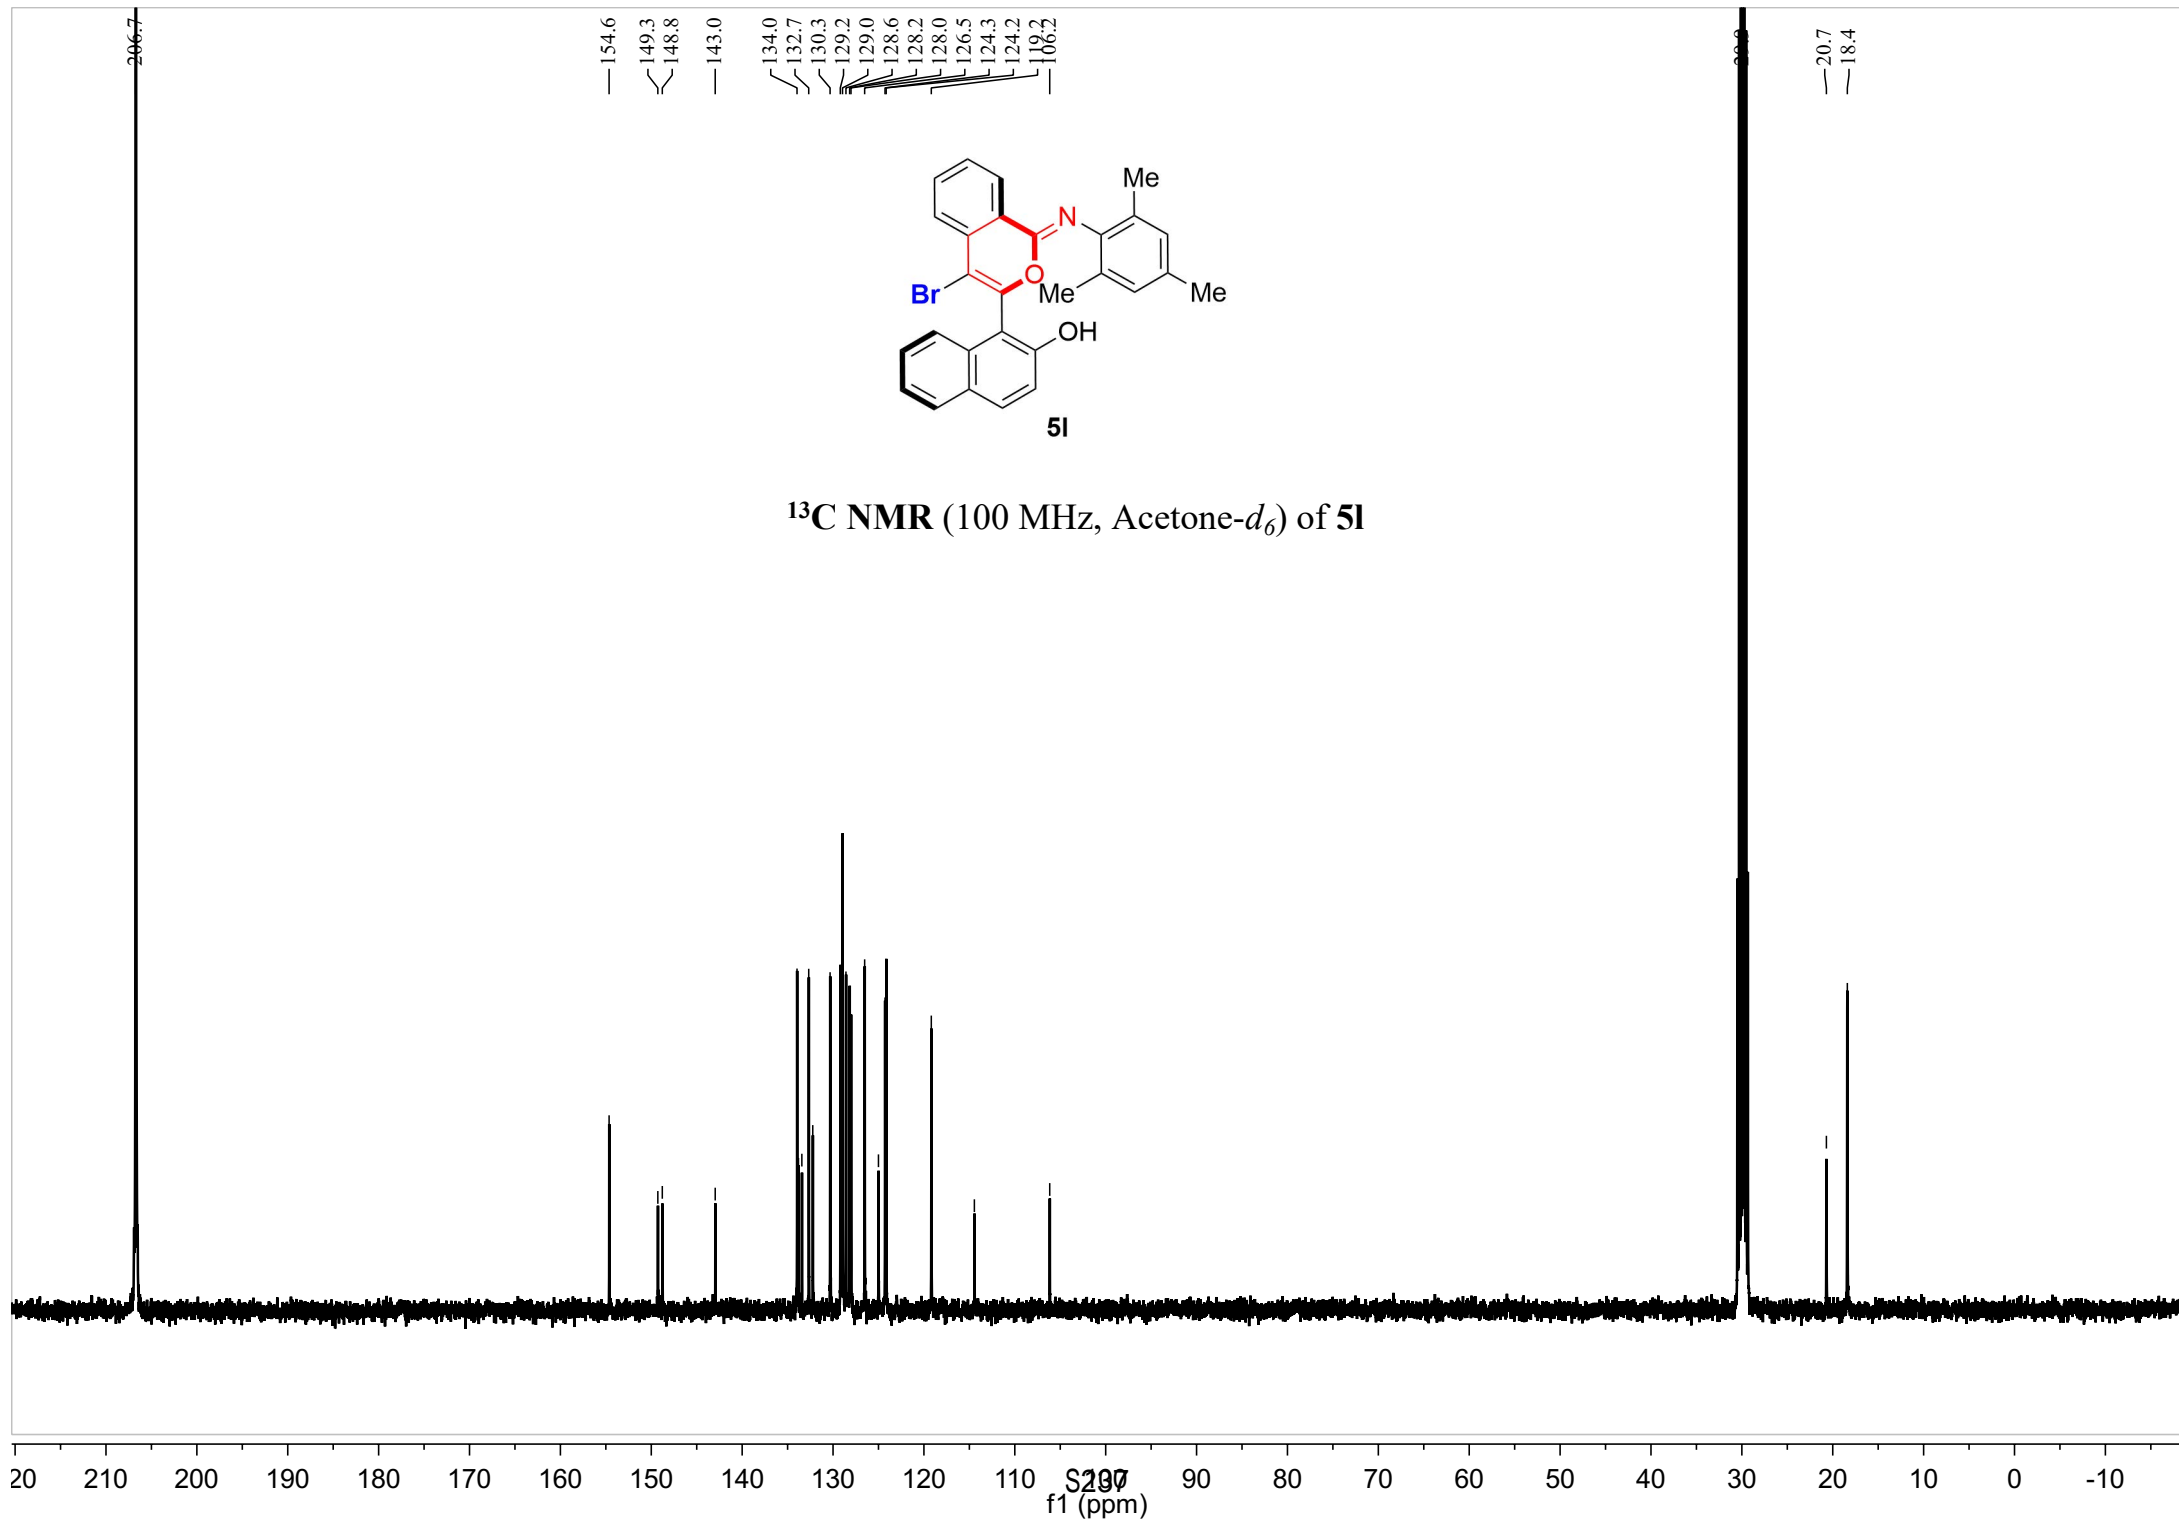

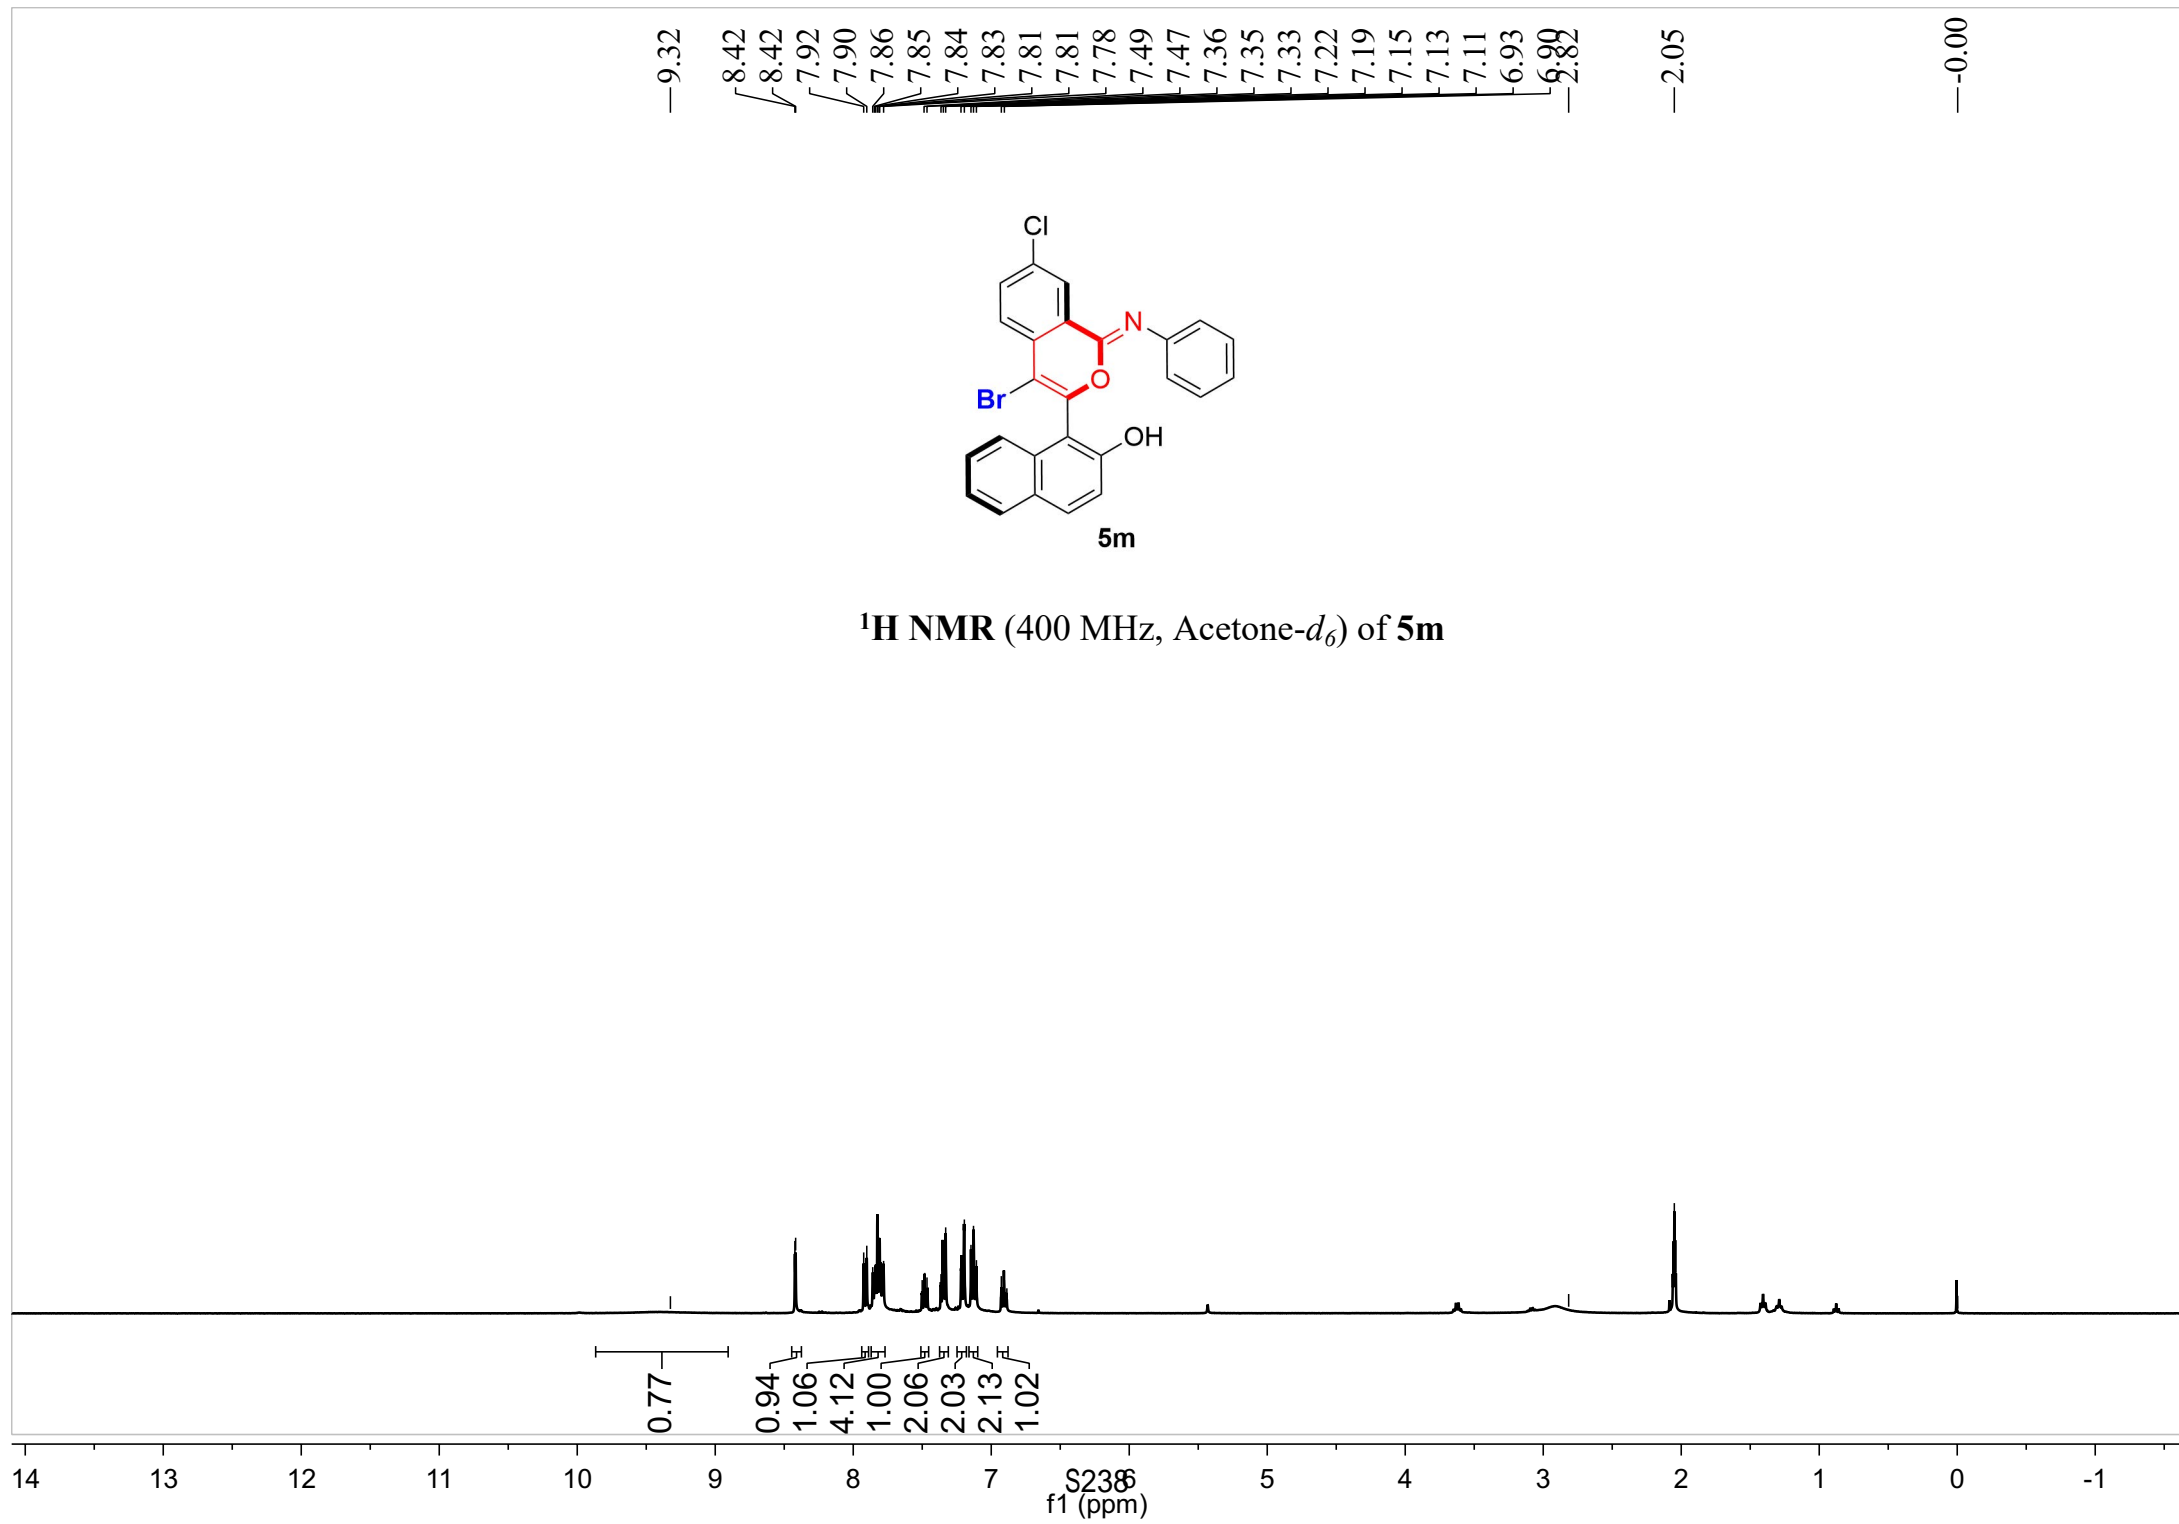

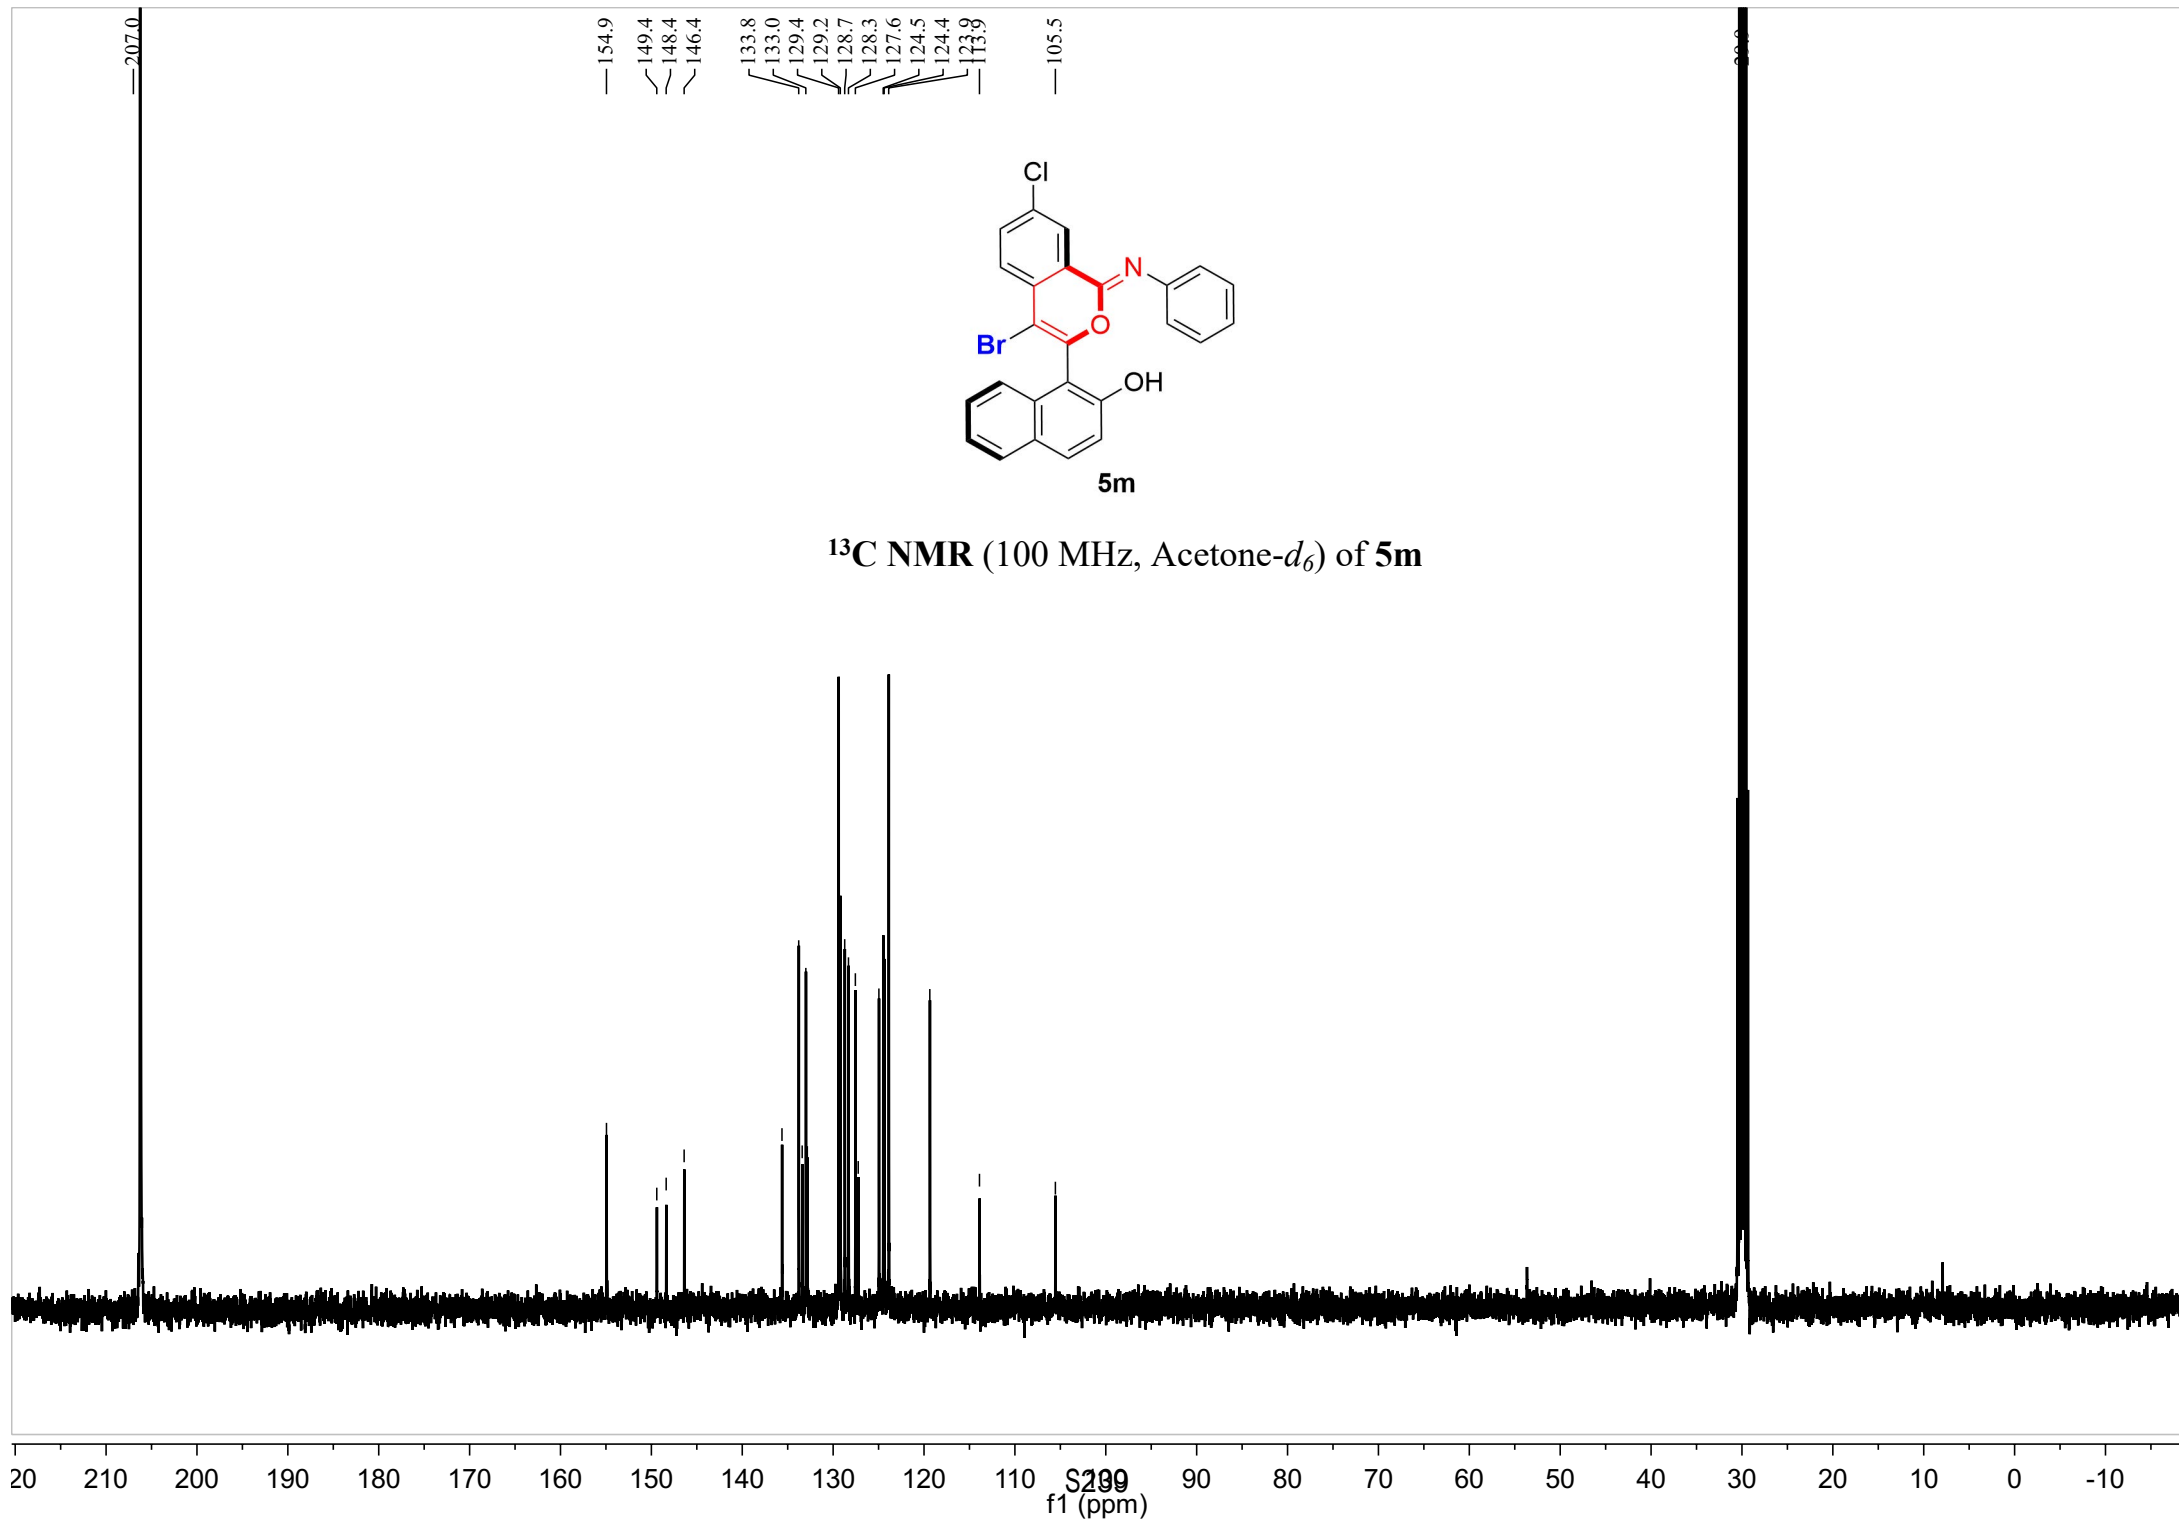

9.11 8.30 7.92 7.90 7.85 7.83 7.77 7.75 7.73 7.71 7.63 7.61 7.51 7.49 7.47 7.35 7.28 7.26 7.20 7.18 7.14 7.10 6.88 2.97 2.59 2.05 0.01

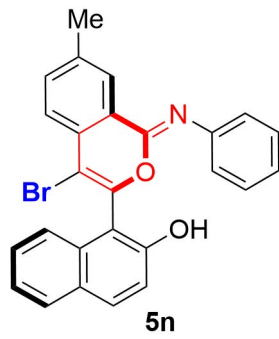

<sup>1</sup>H NMR (400 MHz, Acetone-d<sub>6</sub>) of 5n

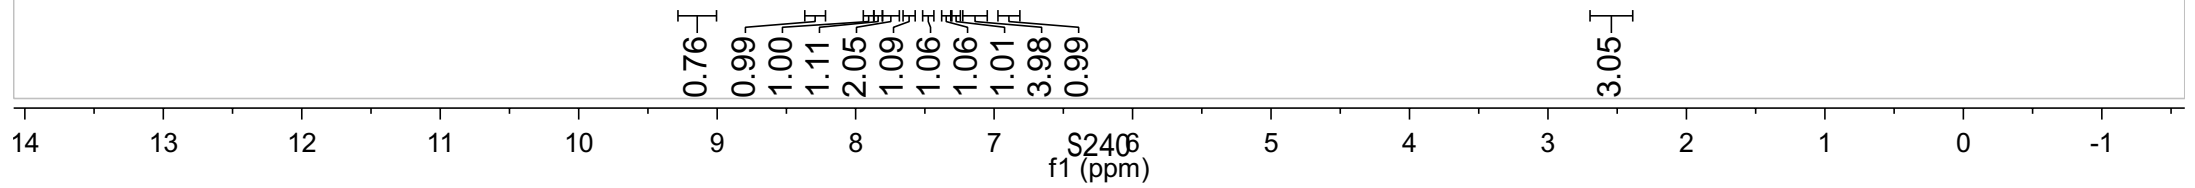



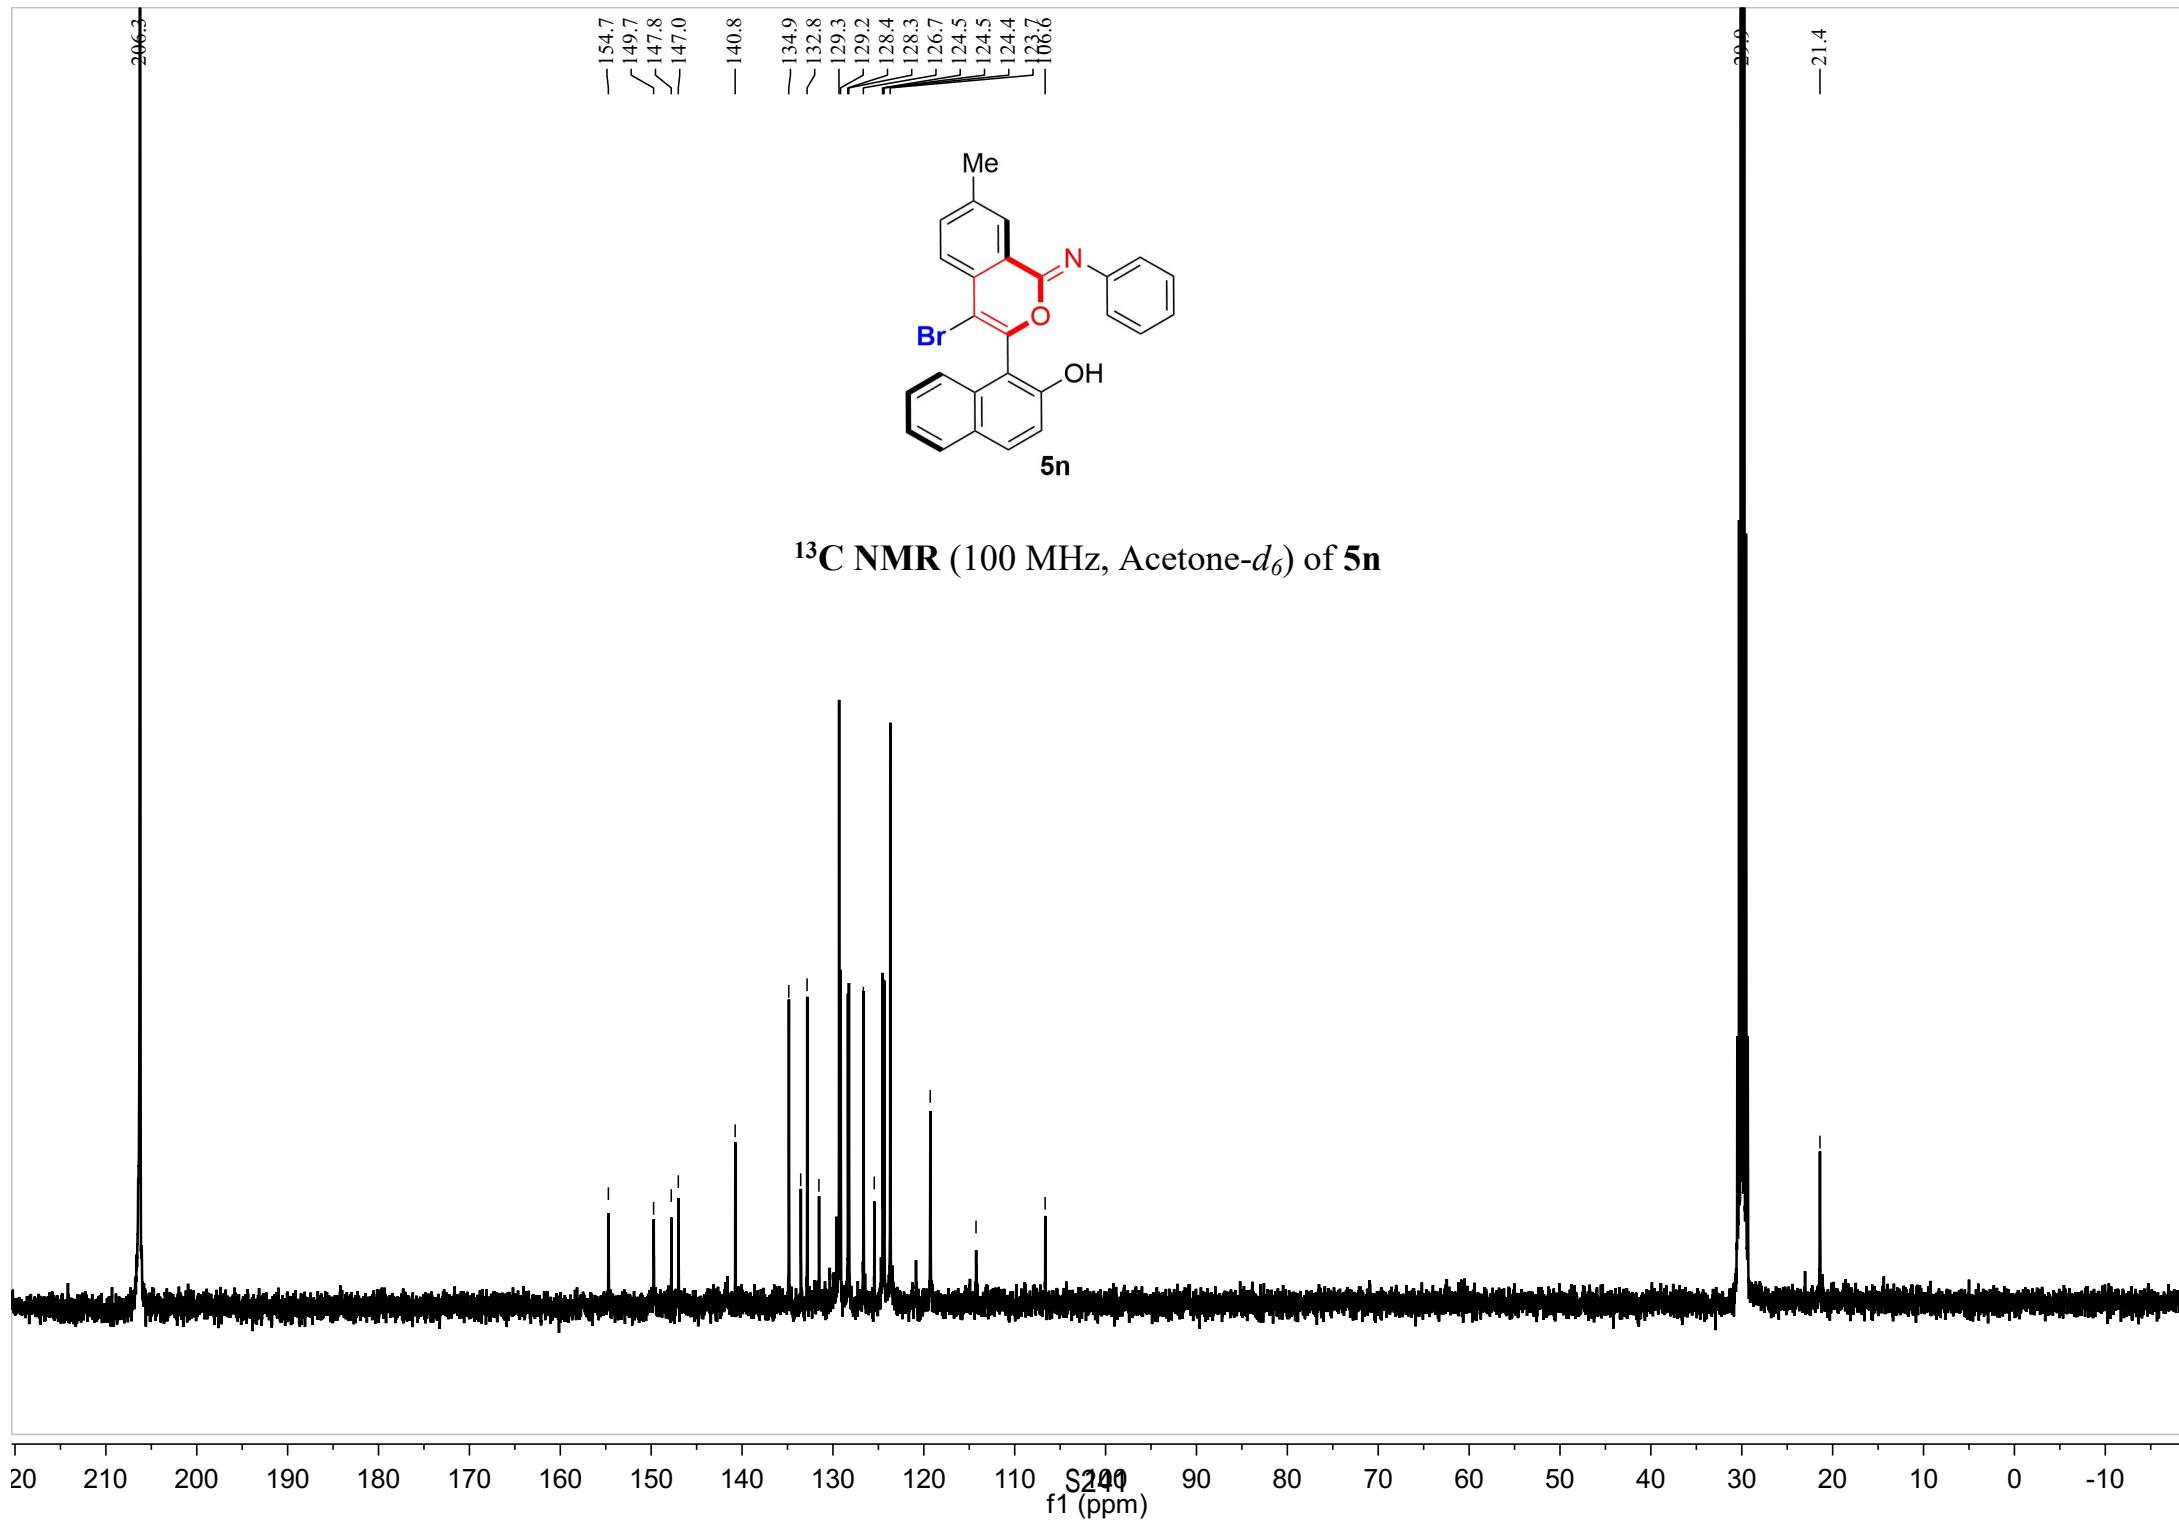

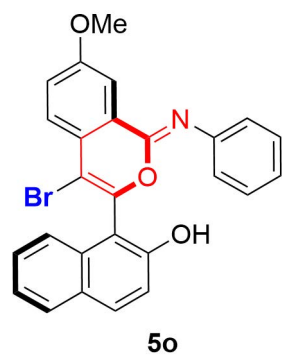

<sup>1</sup>H NMR (400 MHz, Acetone-d<sub>6</sub>) of **5o**

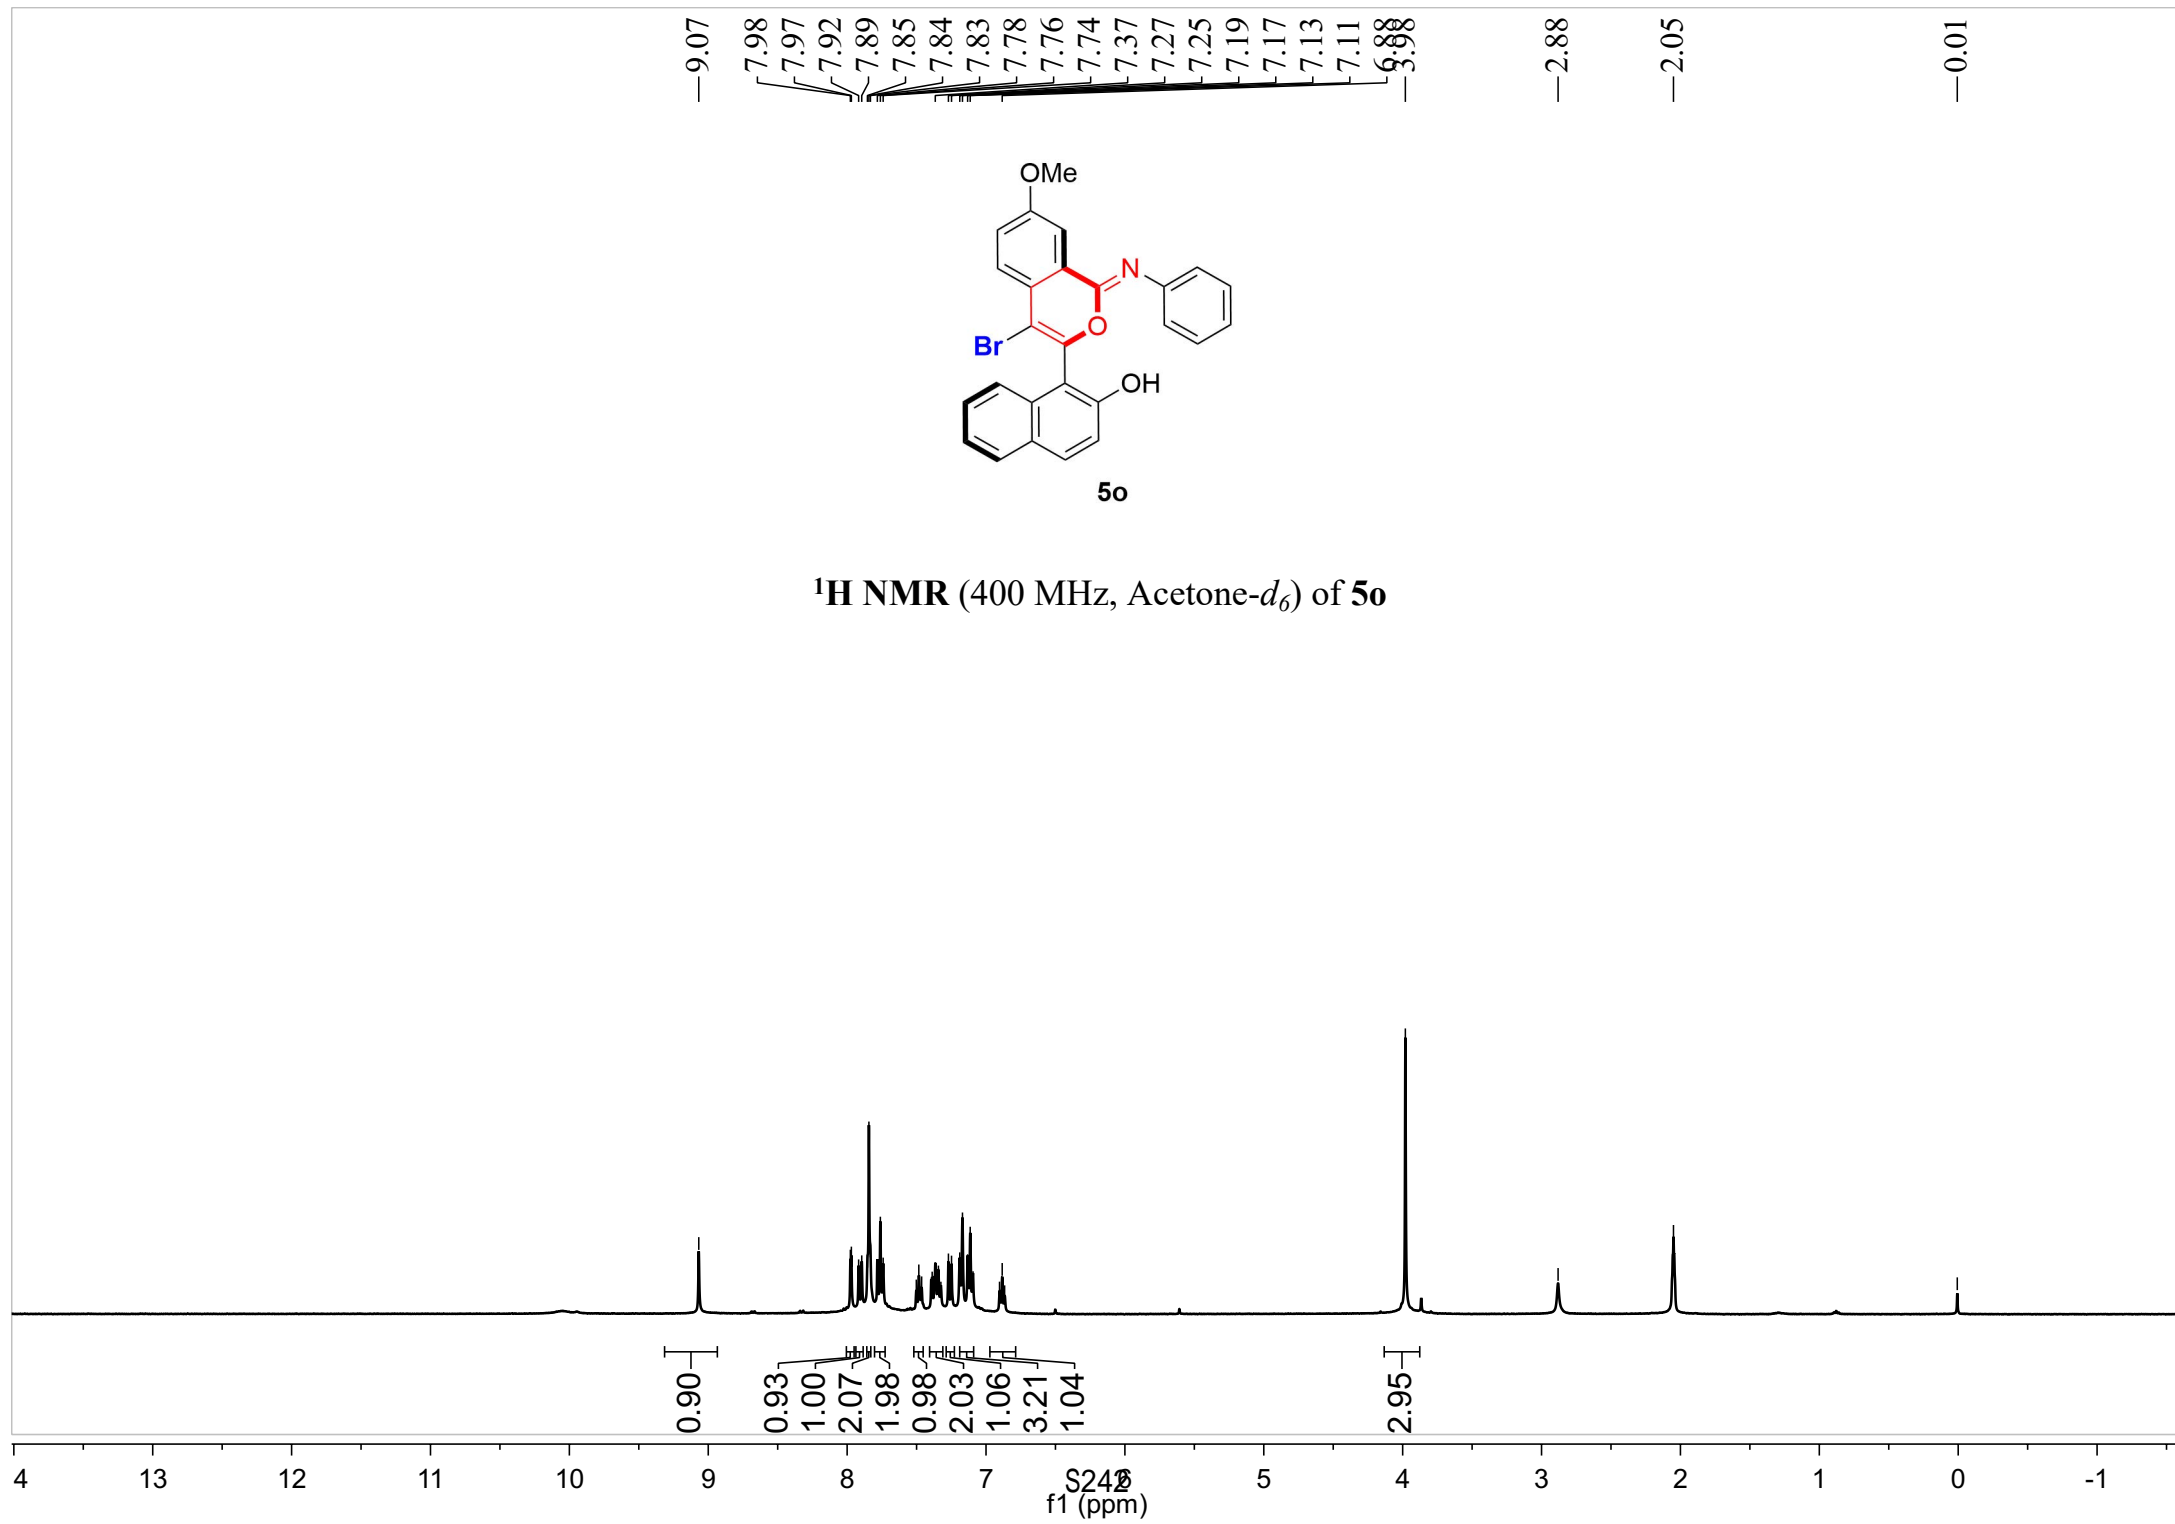

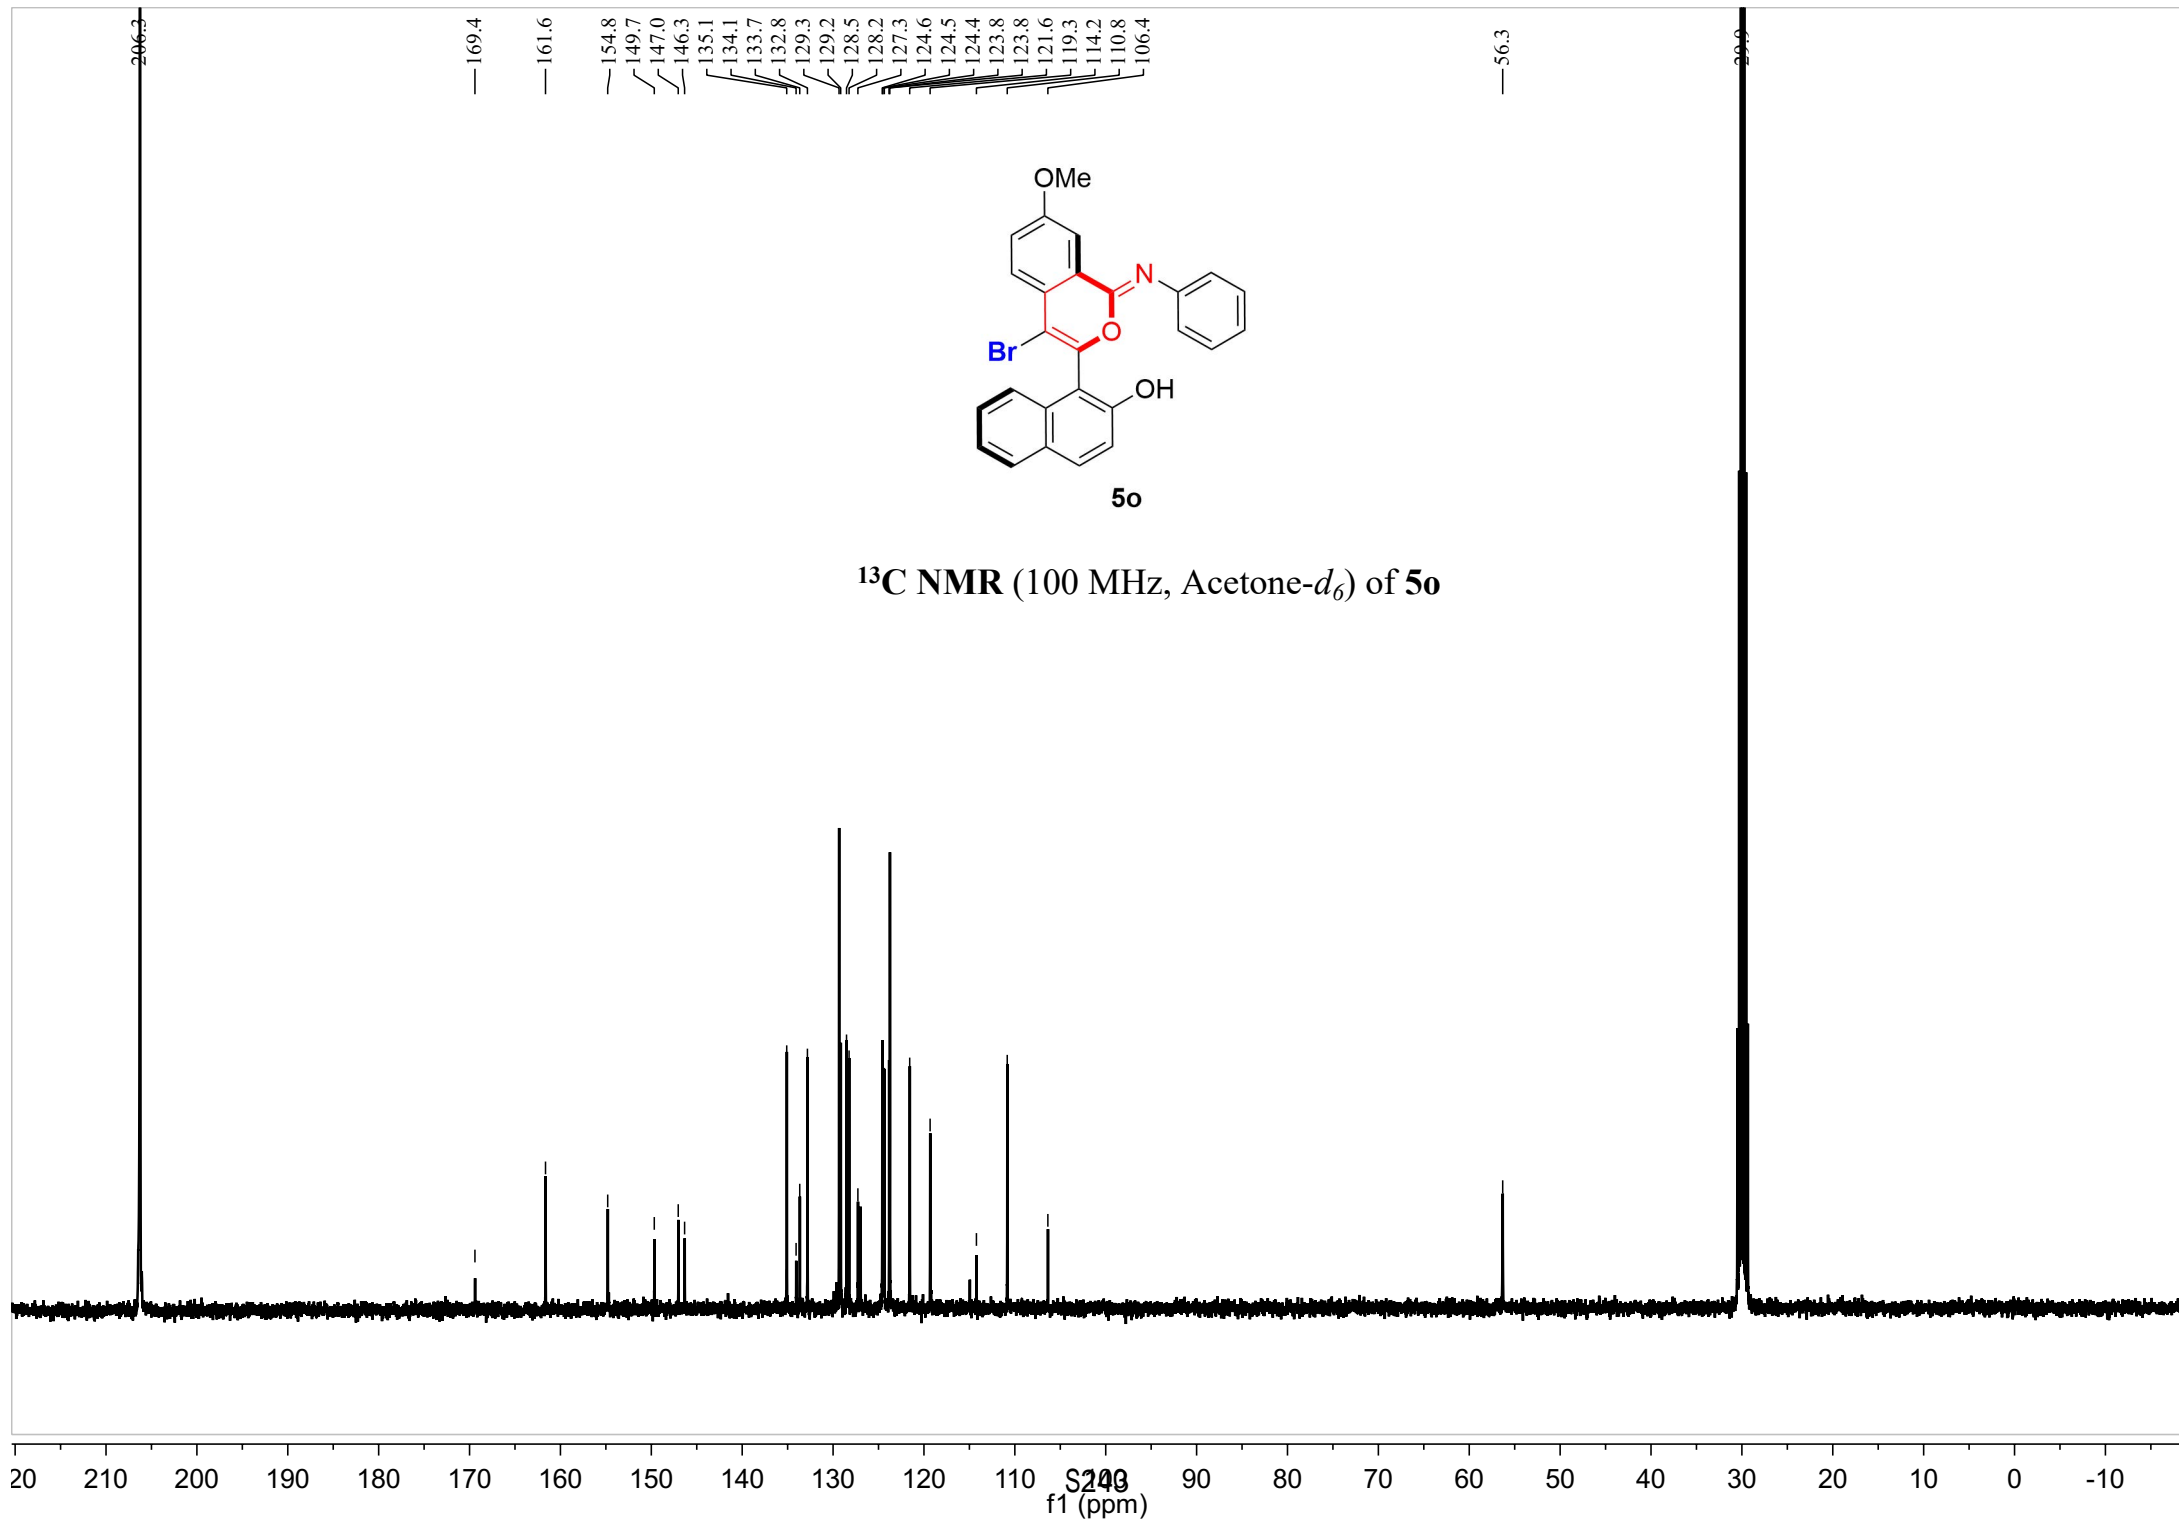

9.23  
8.48  
8.46  
8.01  
7.97  
7.96  
7.95  
7.94  
7.83  
7.80  
7.68  
7.66  
7.65  
7.41  
7.39  
7.30  
7.28  
7.19  
7.17  
7.11  
7.09  
2.96  
2.05  
0.00

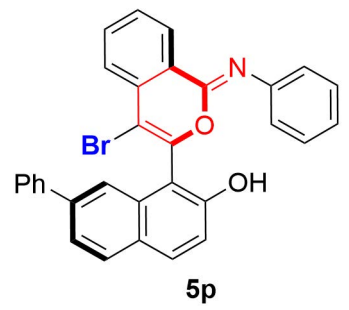

<sup>1</sup>H NMR (400 MHz, Acetone-d<sub>6</sub>) of 5p

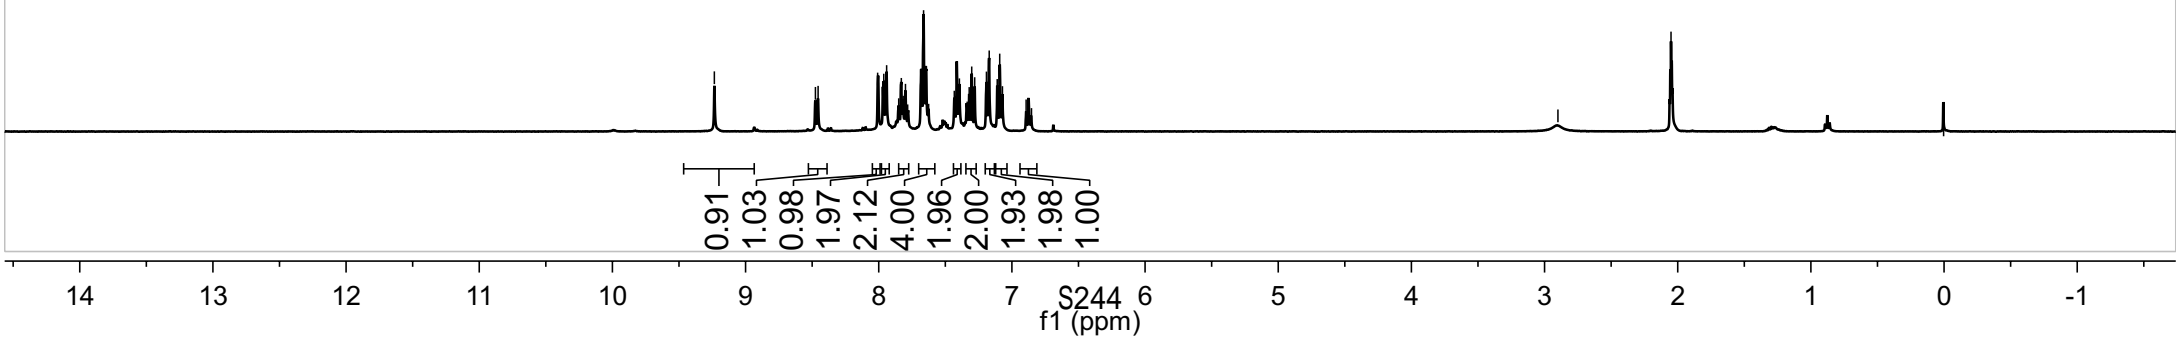

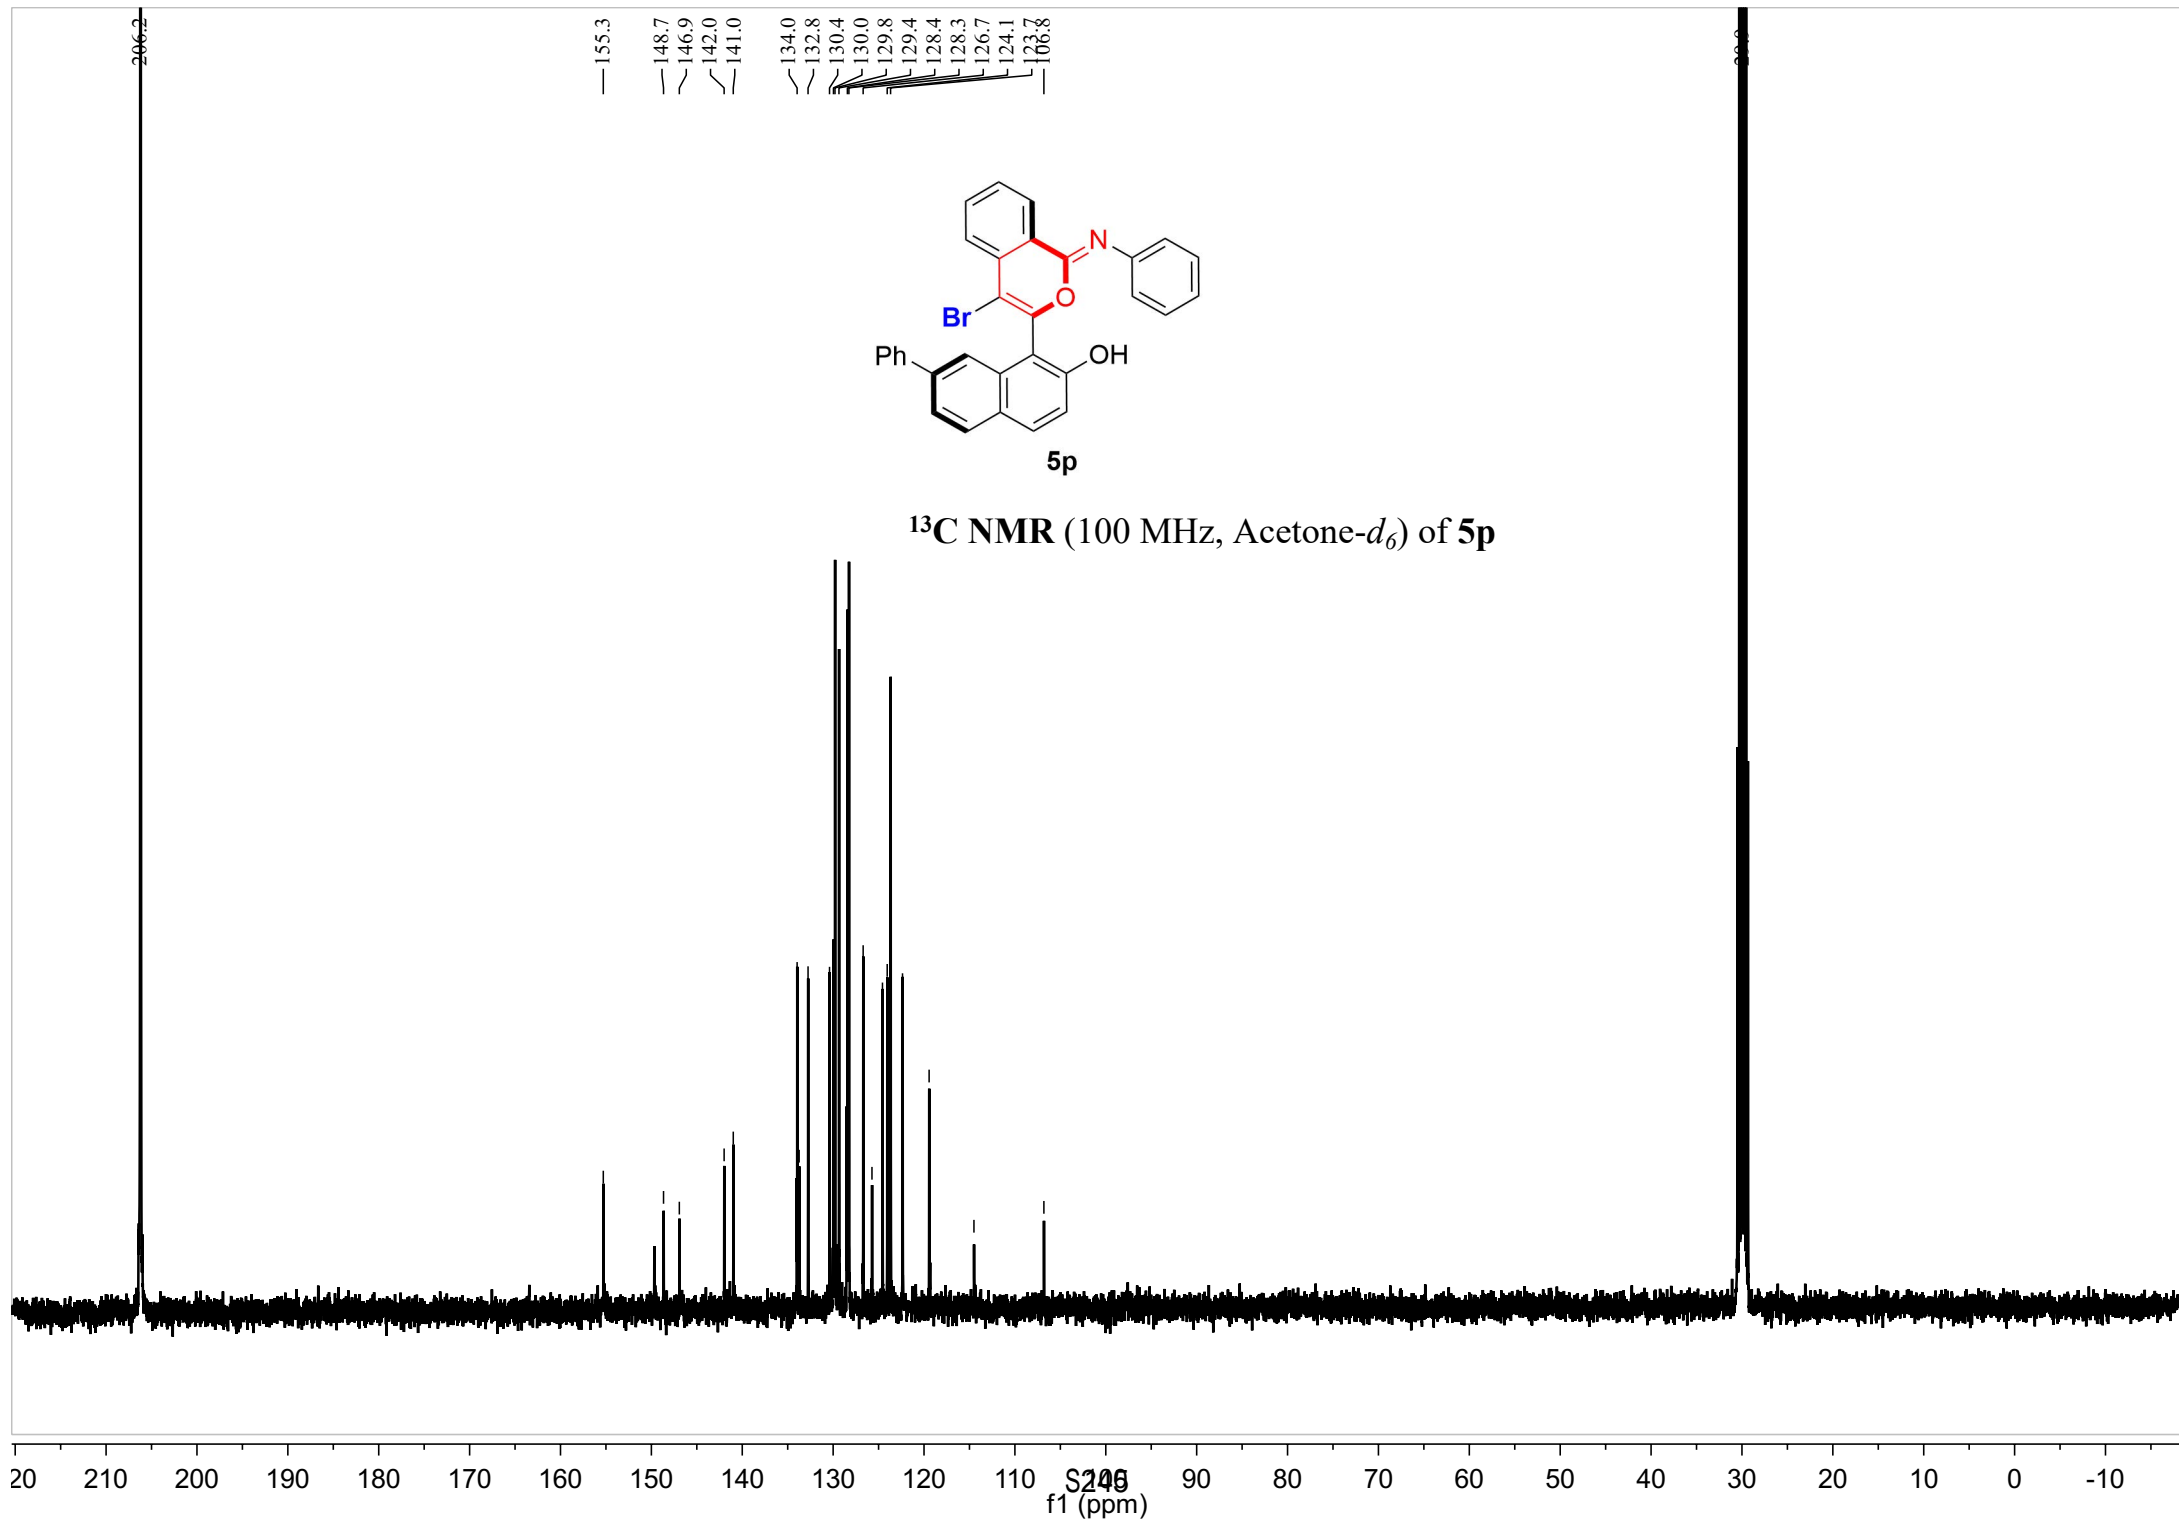

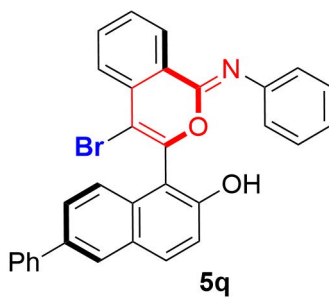

**$^1\text{H}$  NMR (400 MHz, Acetone- $d_6$ ) of **5q****

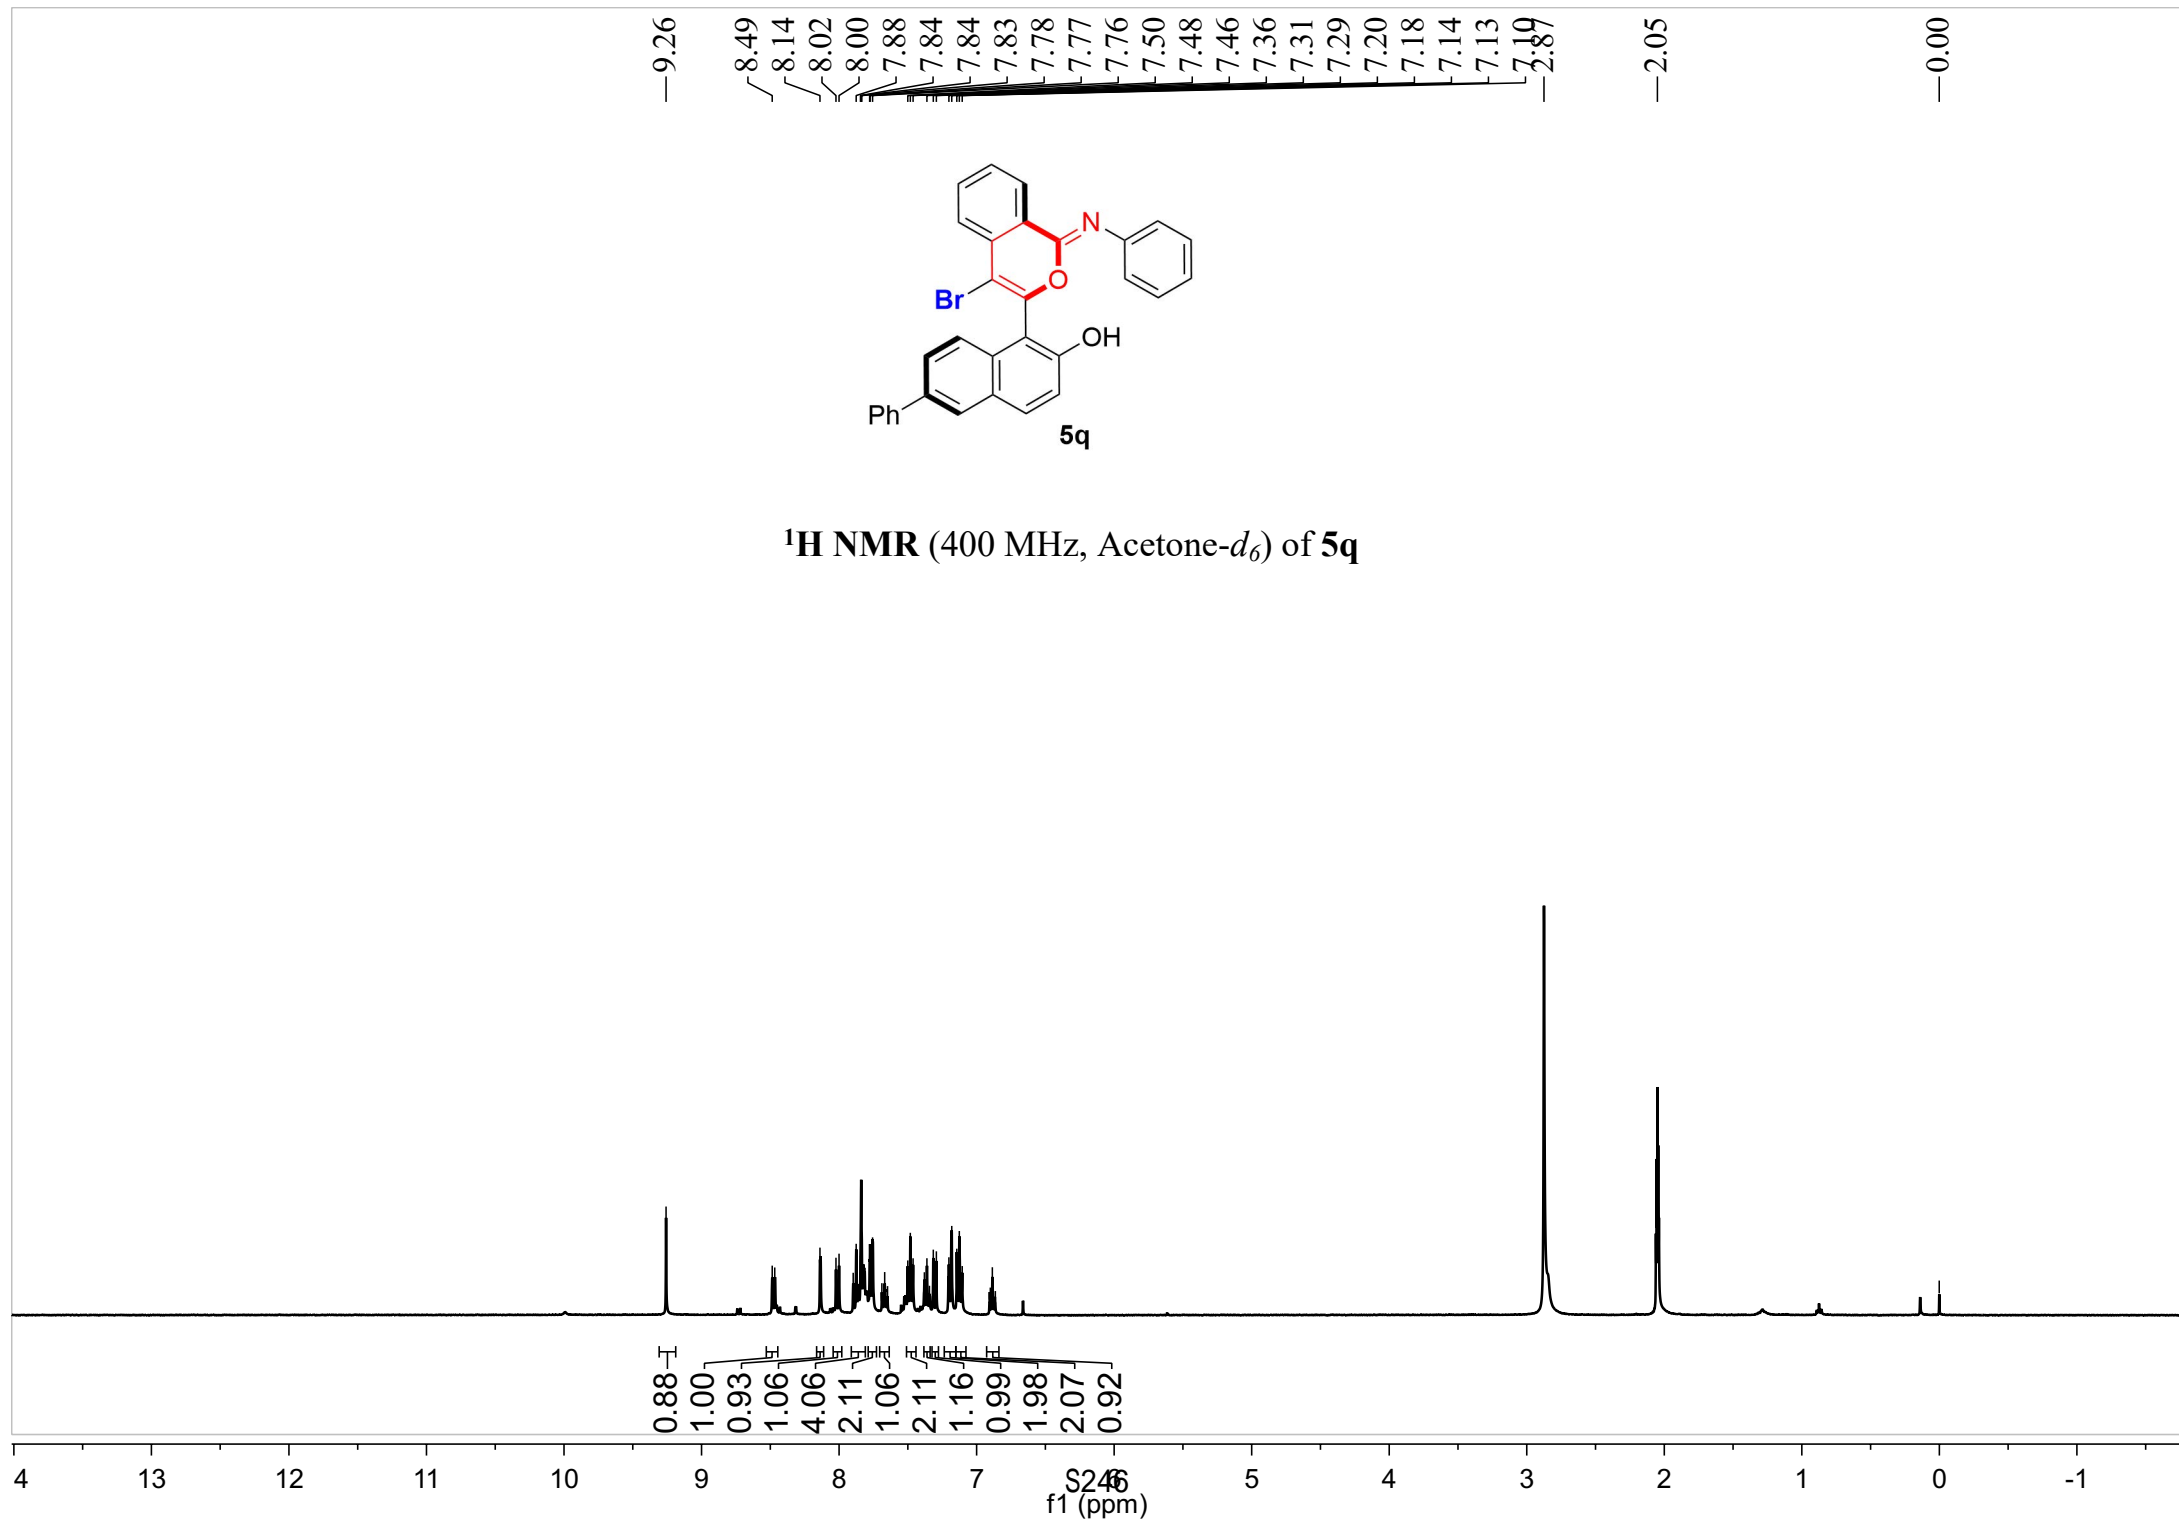

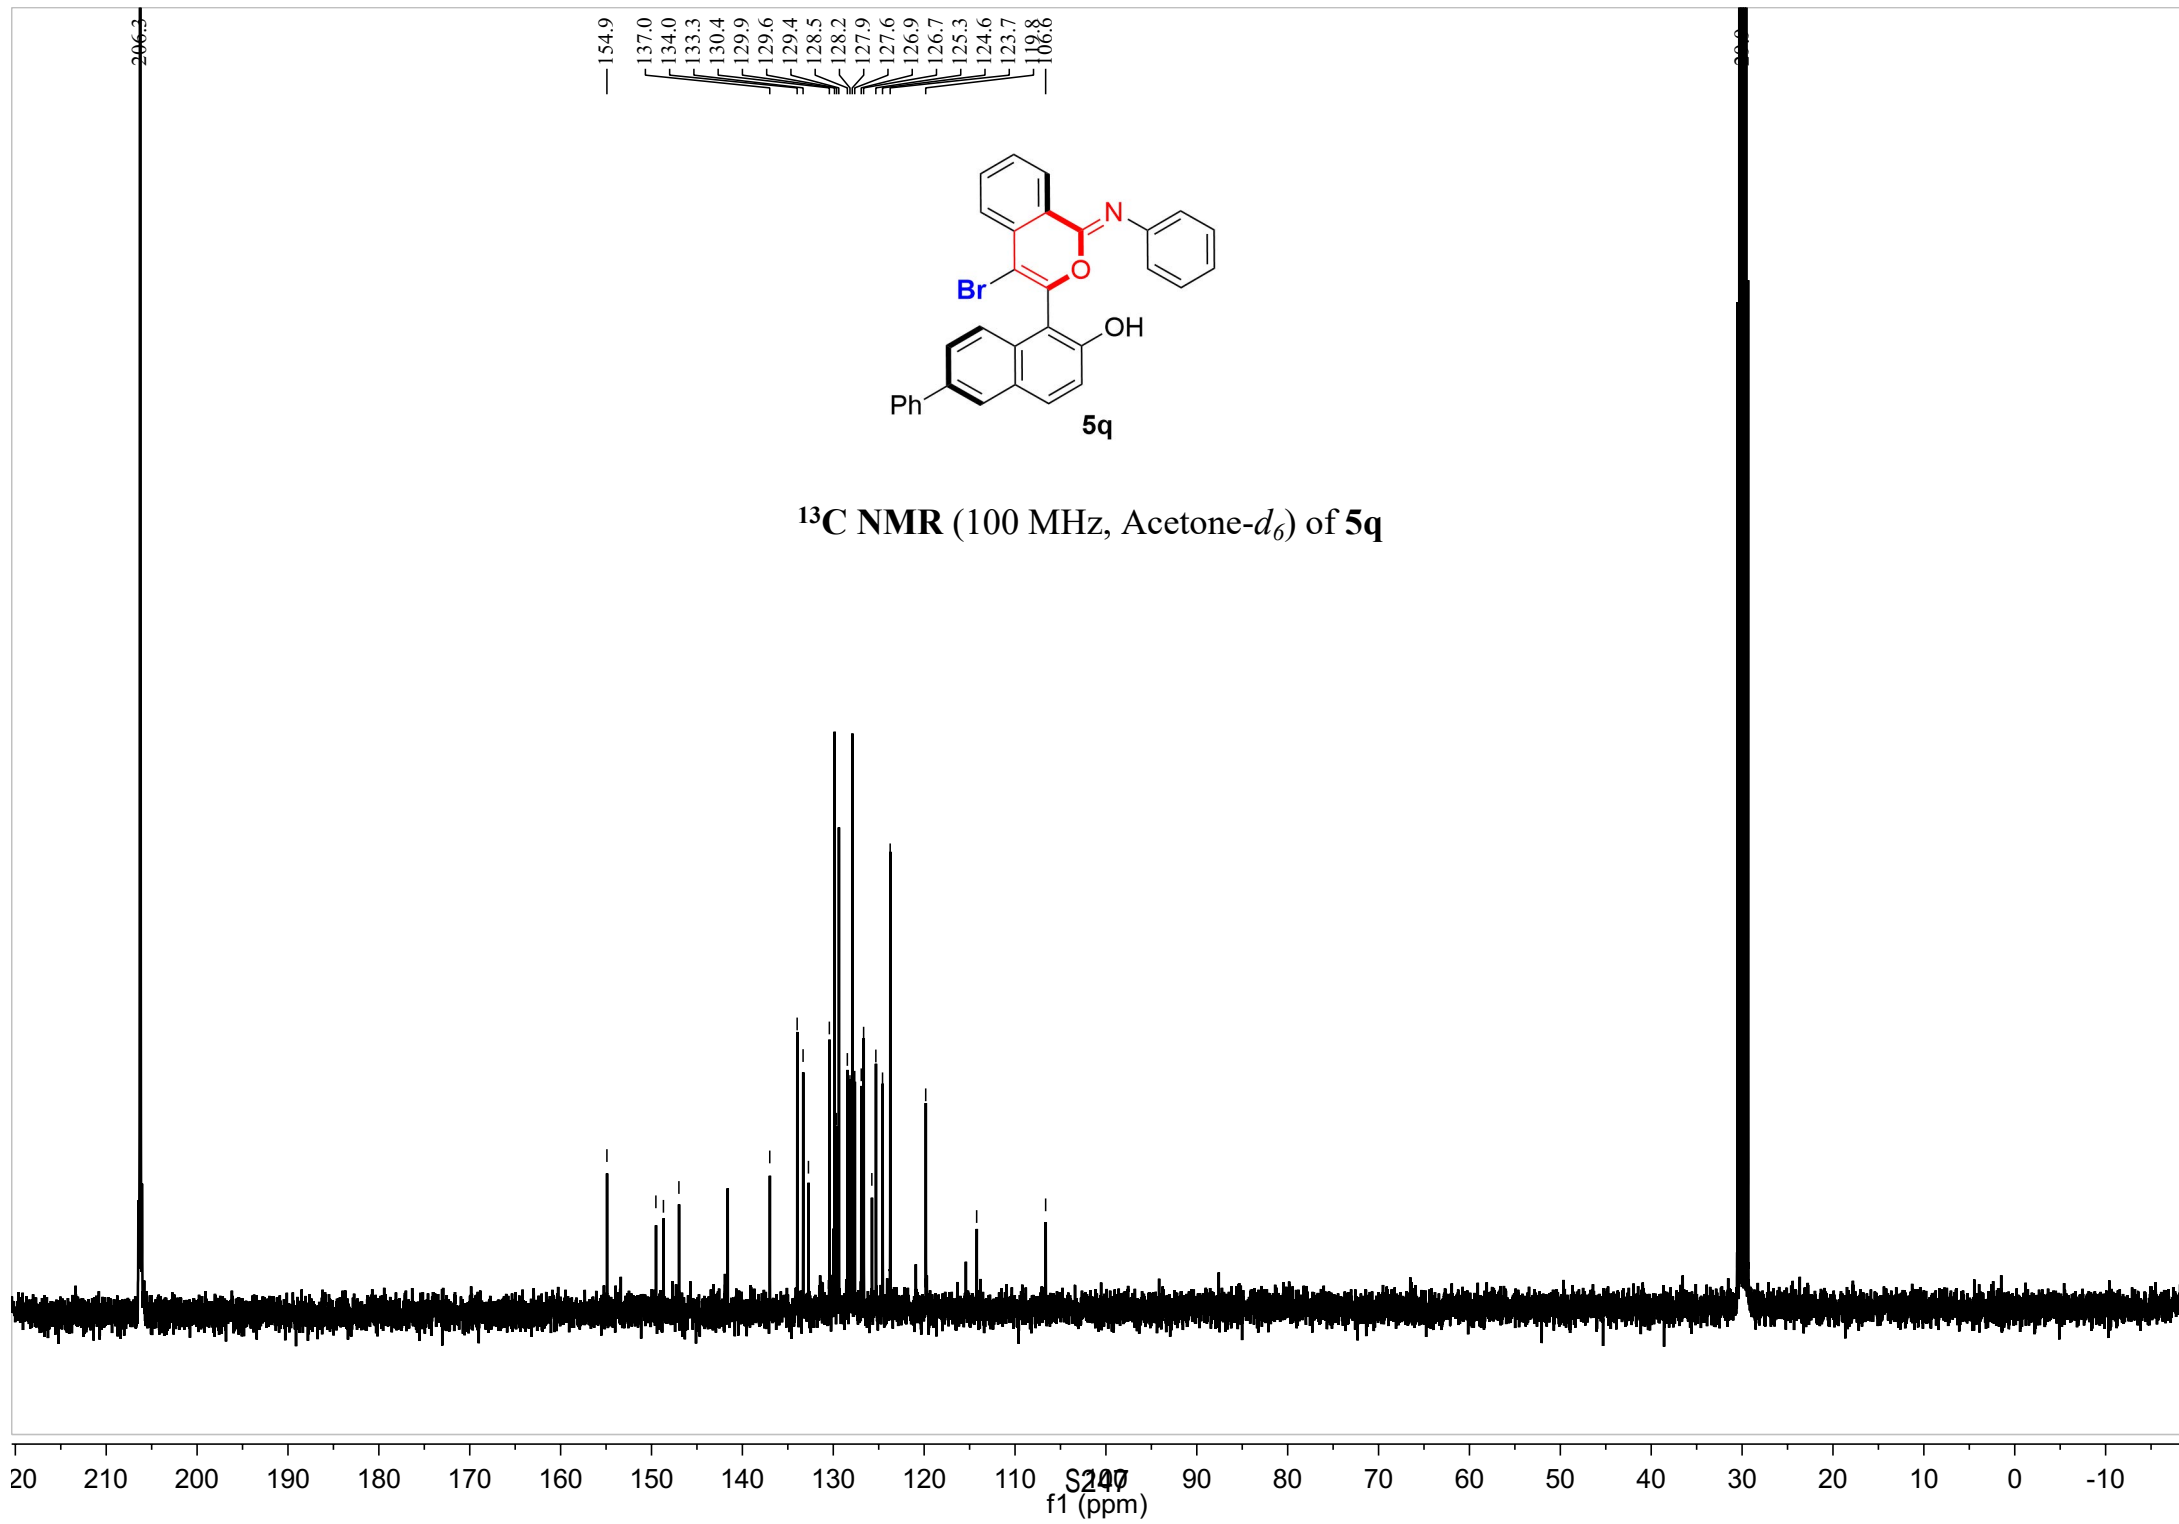

8.40  
8.38  
8.35  
8.33  
8.19  
8.18  
8.17  
8.11  
8.09  
8.08  
8.06  
8.04  
8.02  
7.96  
7.94  
7.83  
7.81  
7.79  
7.75  
7.74  
7.72

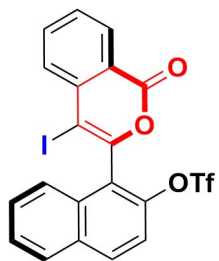

6

<sup>1</sup>H NMR (400 MHz, Acetone-*d*<sub>6</sub>) of 6

-2.88

-2.05

-0.00

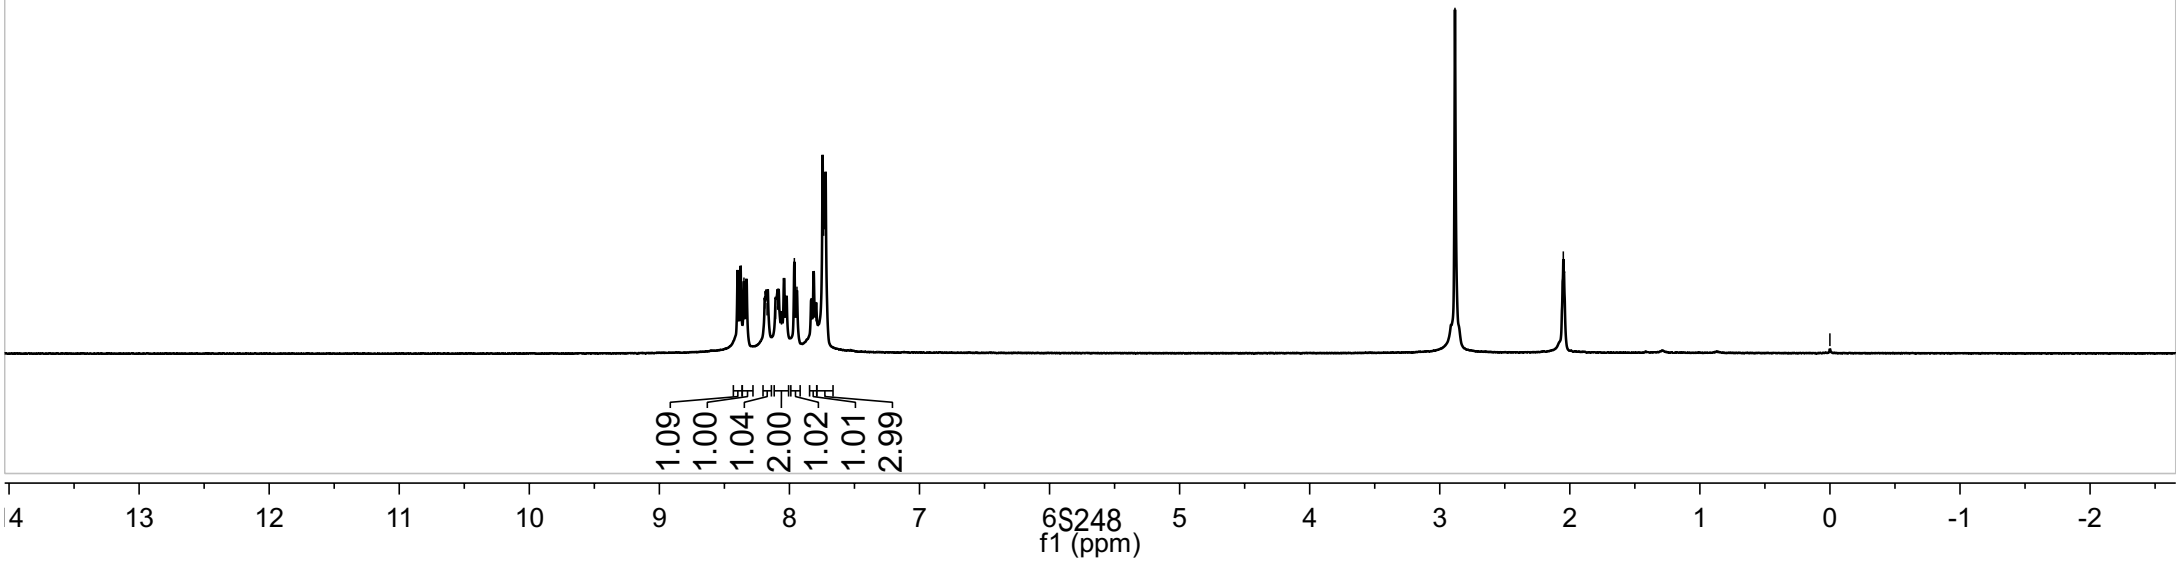

4 13 12 11 10 9 8 7 6S248 f1 (ppm) 5 4 3 2 1 0 -1 -2



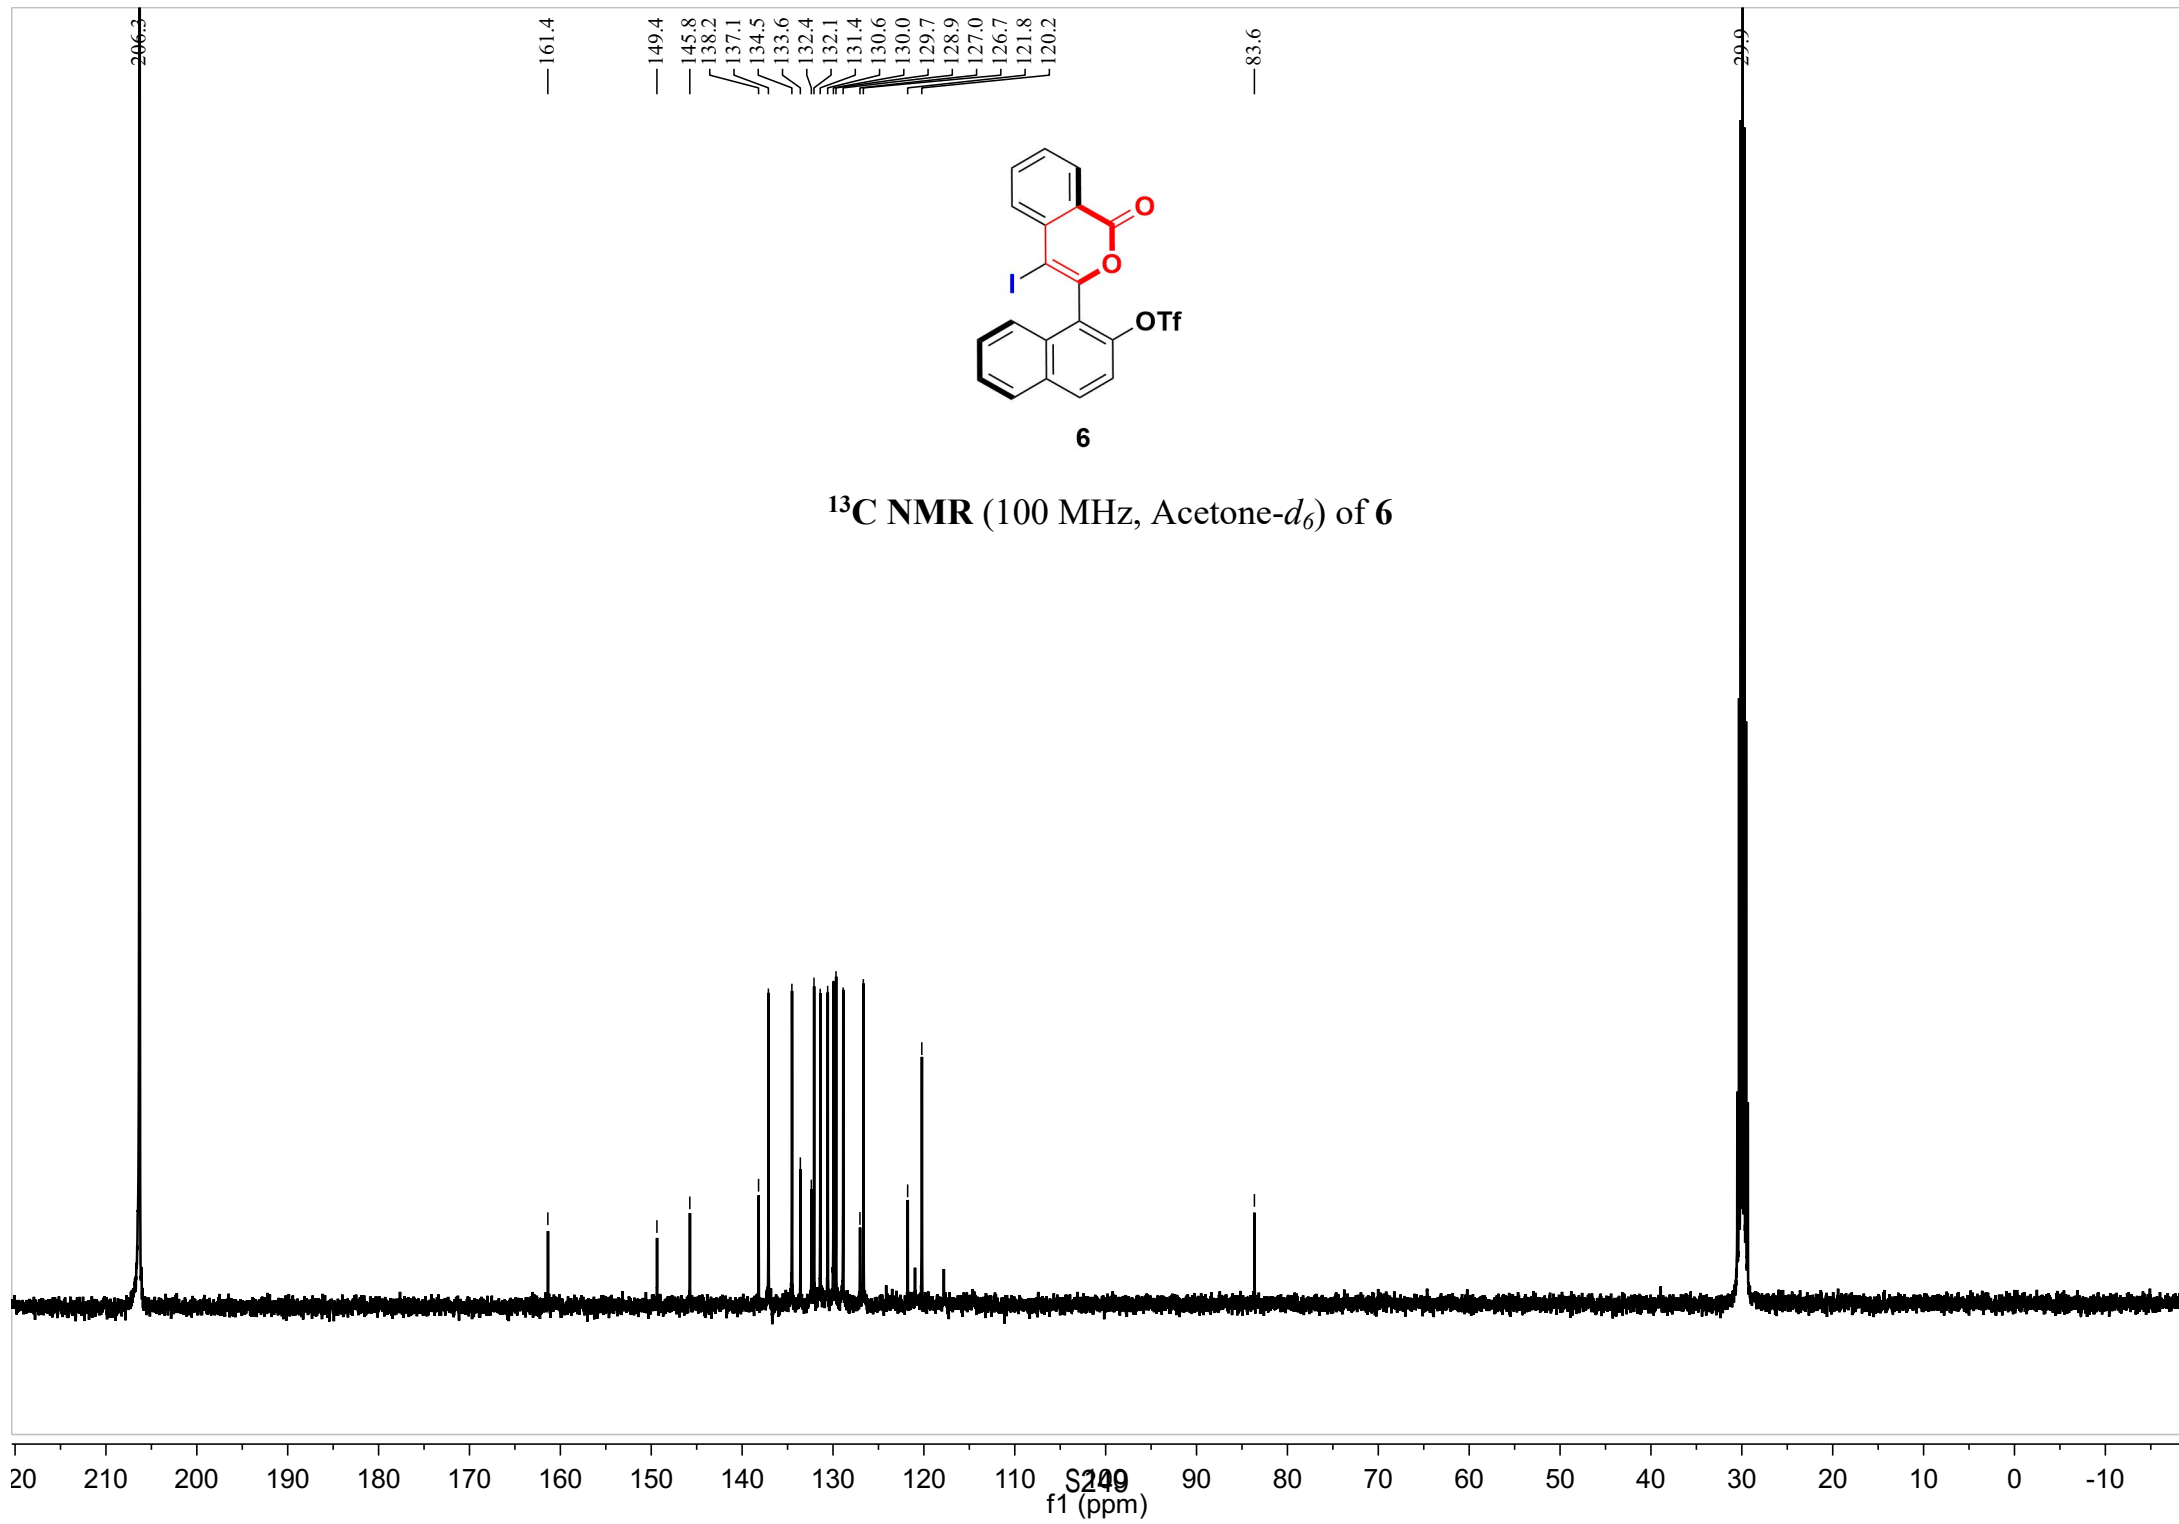

9.54 8.28 8.26 8.24 8.23 7.85 7.83 7.81 7.79 7.63 7.61 7.55 7.53 7.51 7.43 7.41 7.31 7.29 7.27 7.19 3.33 1.61 0.00

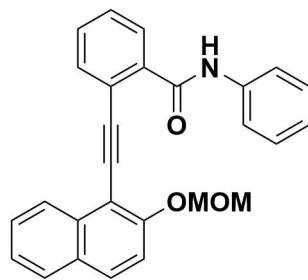

7

<sup>1</sup>H NMR (400 MHz, CDCl<sub>3</sub>) of 7

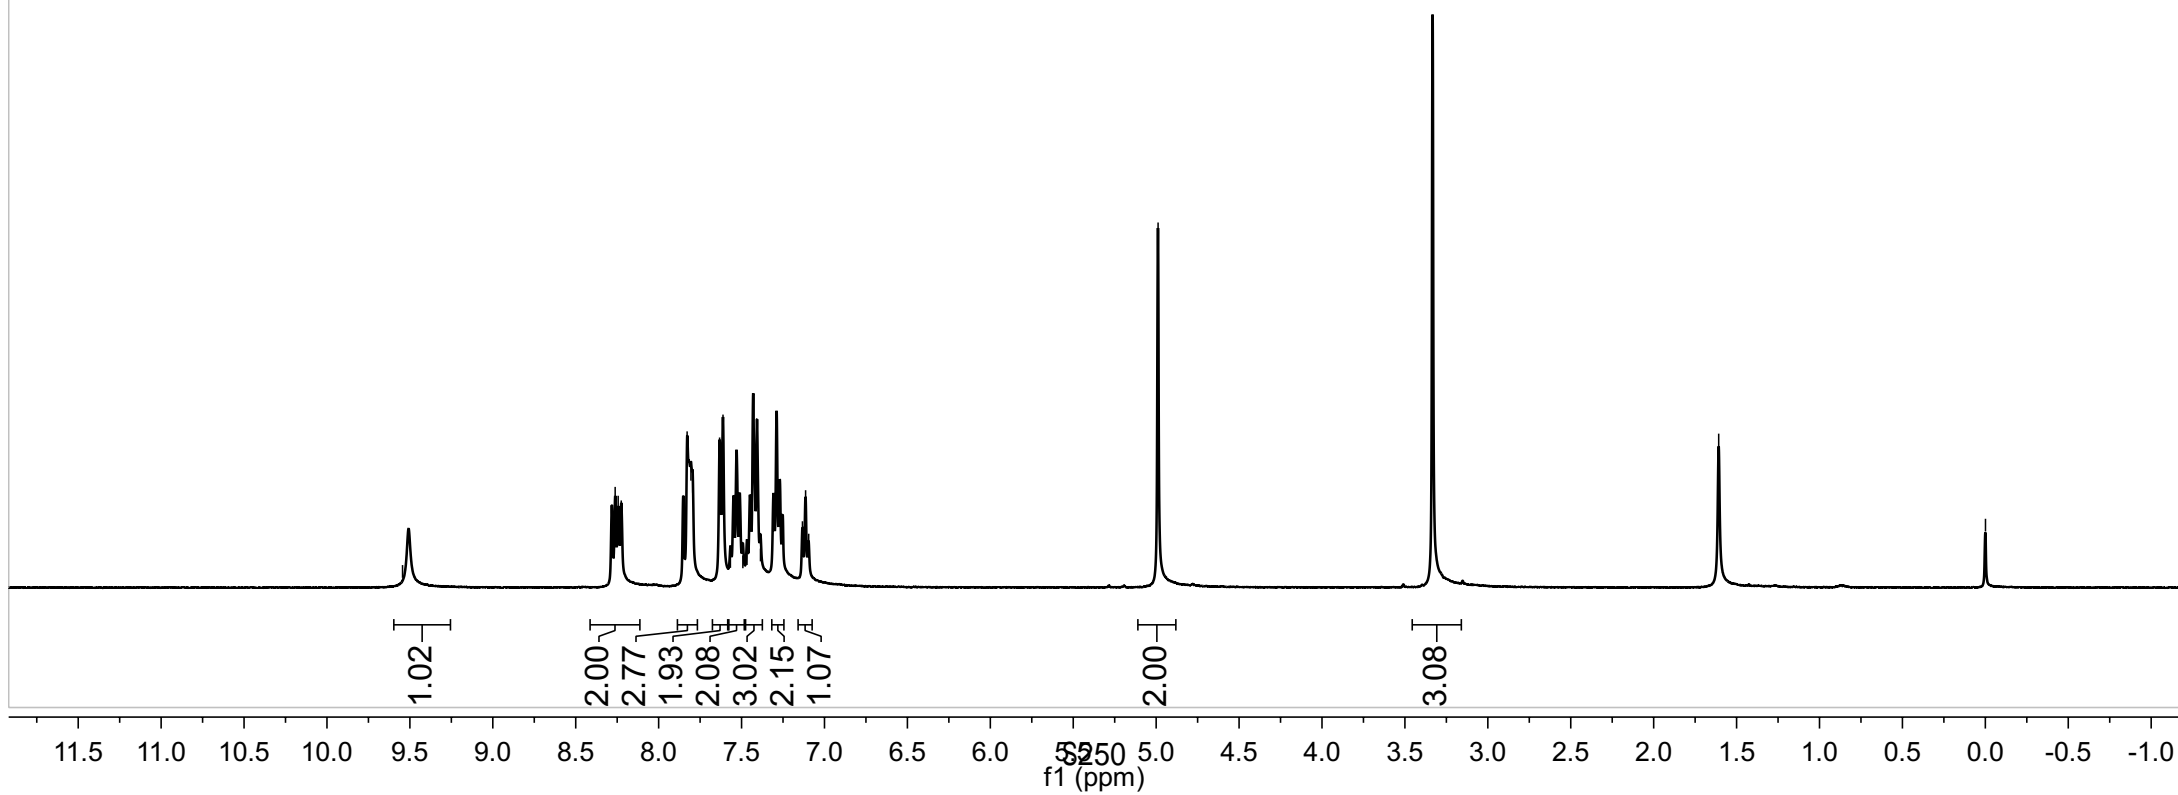

— 164.5 — 157.4 — 138.0 — 135.1 — 134.2 — 133.8 — 131.2 — 131.0 — 130.6 — 129.1 — 129.0 — 128.9 — 128.3 — 127.7 — 125.1 — 124.9 — 124.7 — 121.2 — 120.2 — 115.7 — 106.5 — 96.4 — 94.9 — 91.7 — 77.0 — 56.2

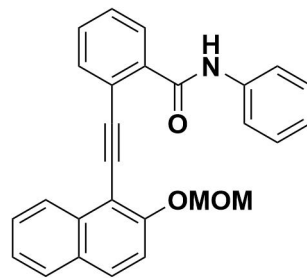

7

<sup>13</sup>C NMR (100 MHz, CDCl<sub>3</sub>) of 7

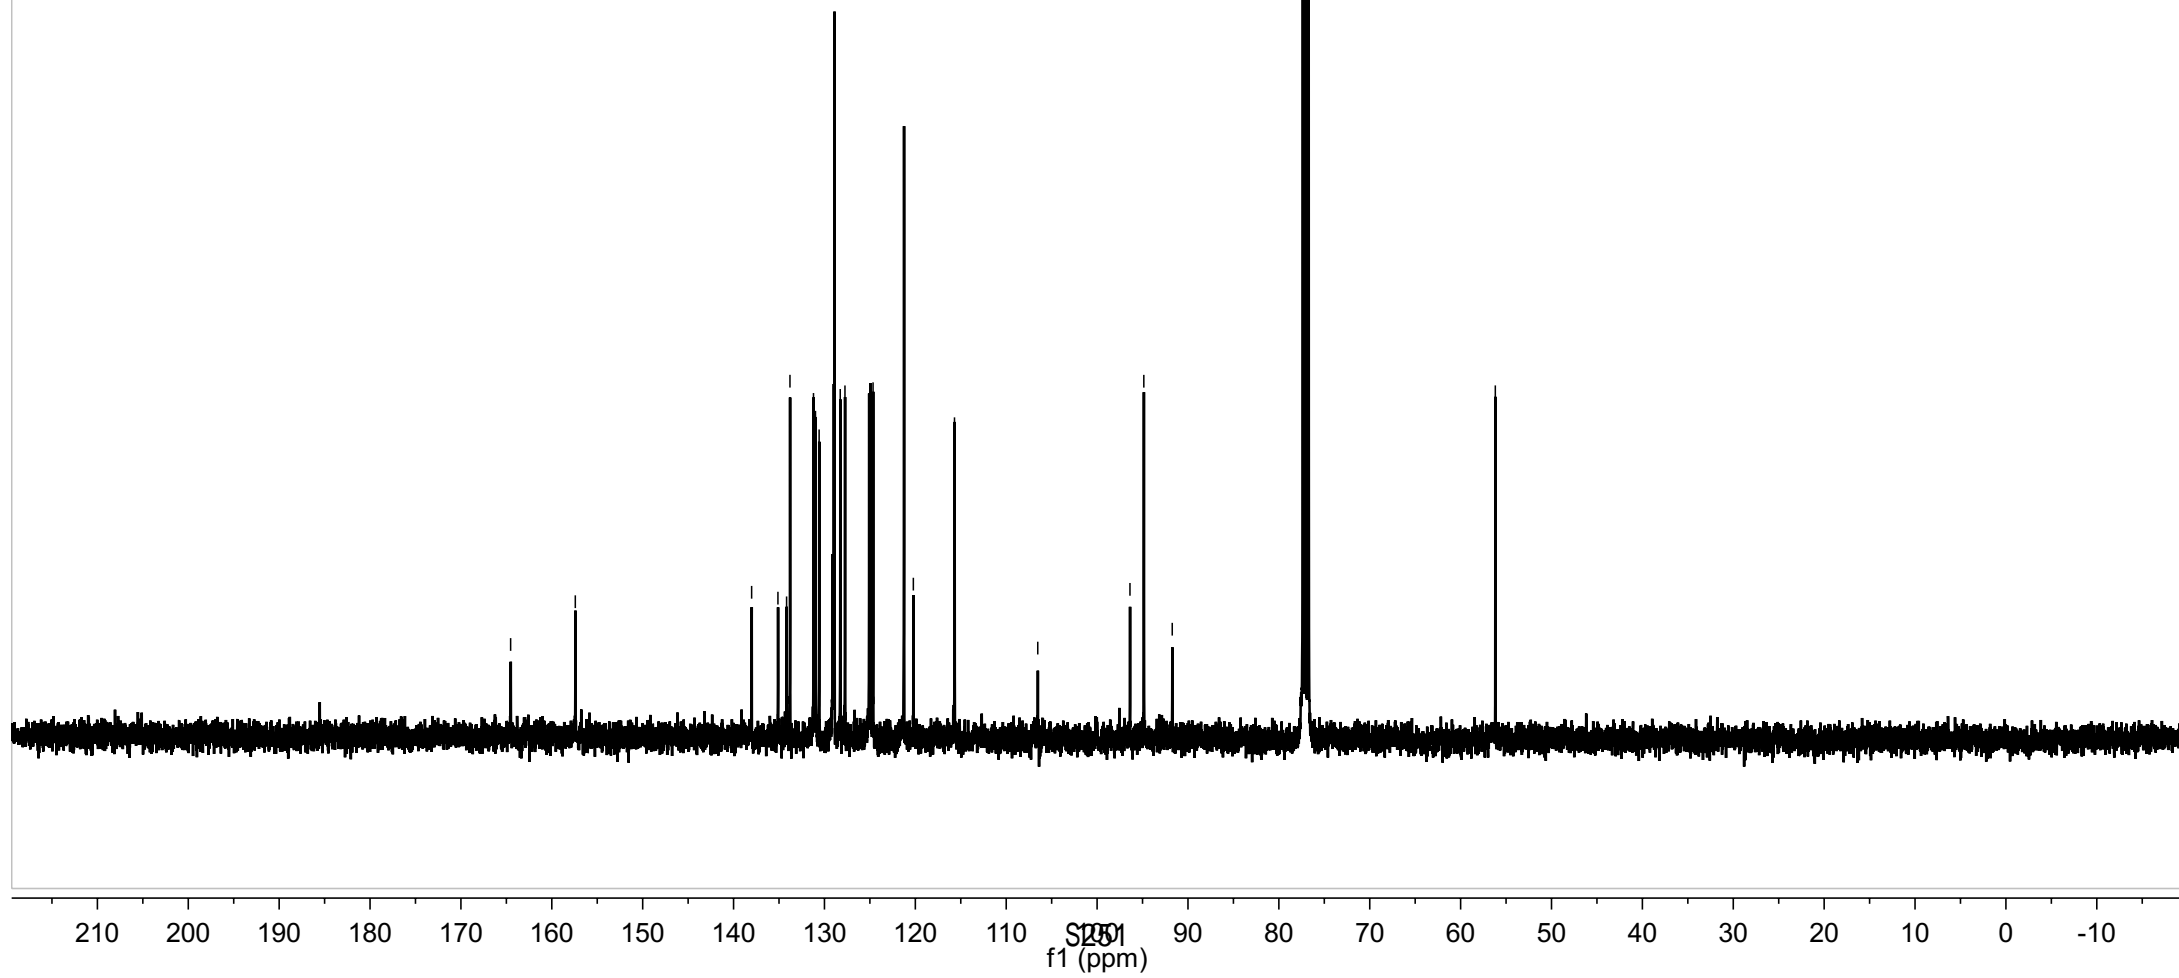

8.43  
8.41  
8.02  
8.00  
7.90  
7.88  
7.83  
7.81  
7.77  
7.76  
7.74  
7.63  
7.61  
7.59  
7.56  
7.54  
7.52  
7.50  
7.43  
7.41  
7.39  
7.39  
7.12  
7.10  
7.09  
7.08  
7.07  
6.87  
6.86  
6.85  
5.35  
5.33  
5.31  
5.29

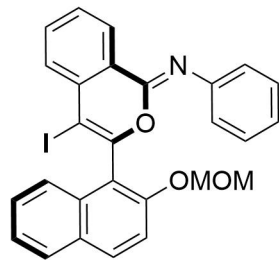

8

<sup>1</sup>H NMR (400 MHz, Acetone-*d*<sub>6</sub>) of 8

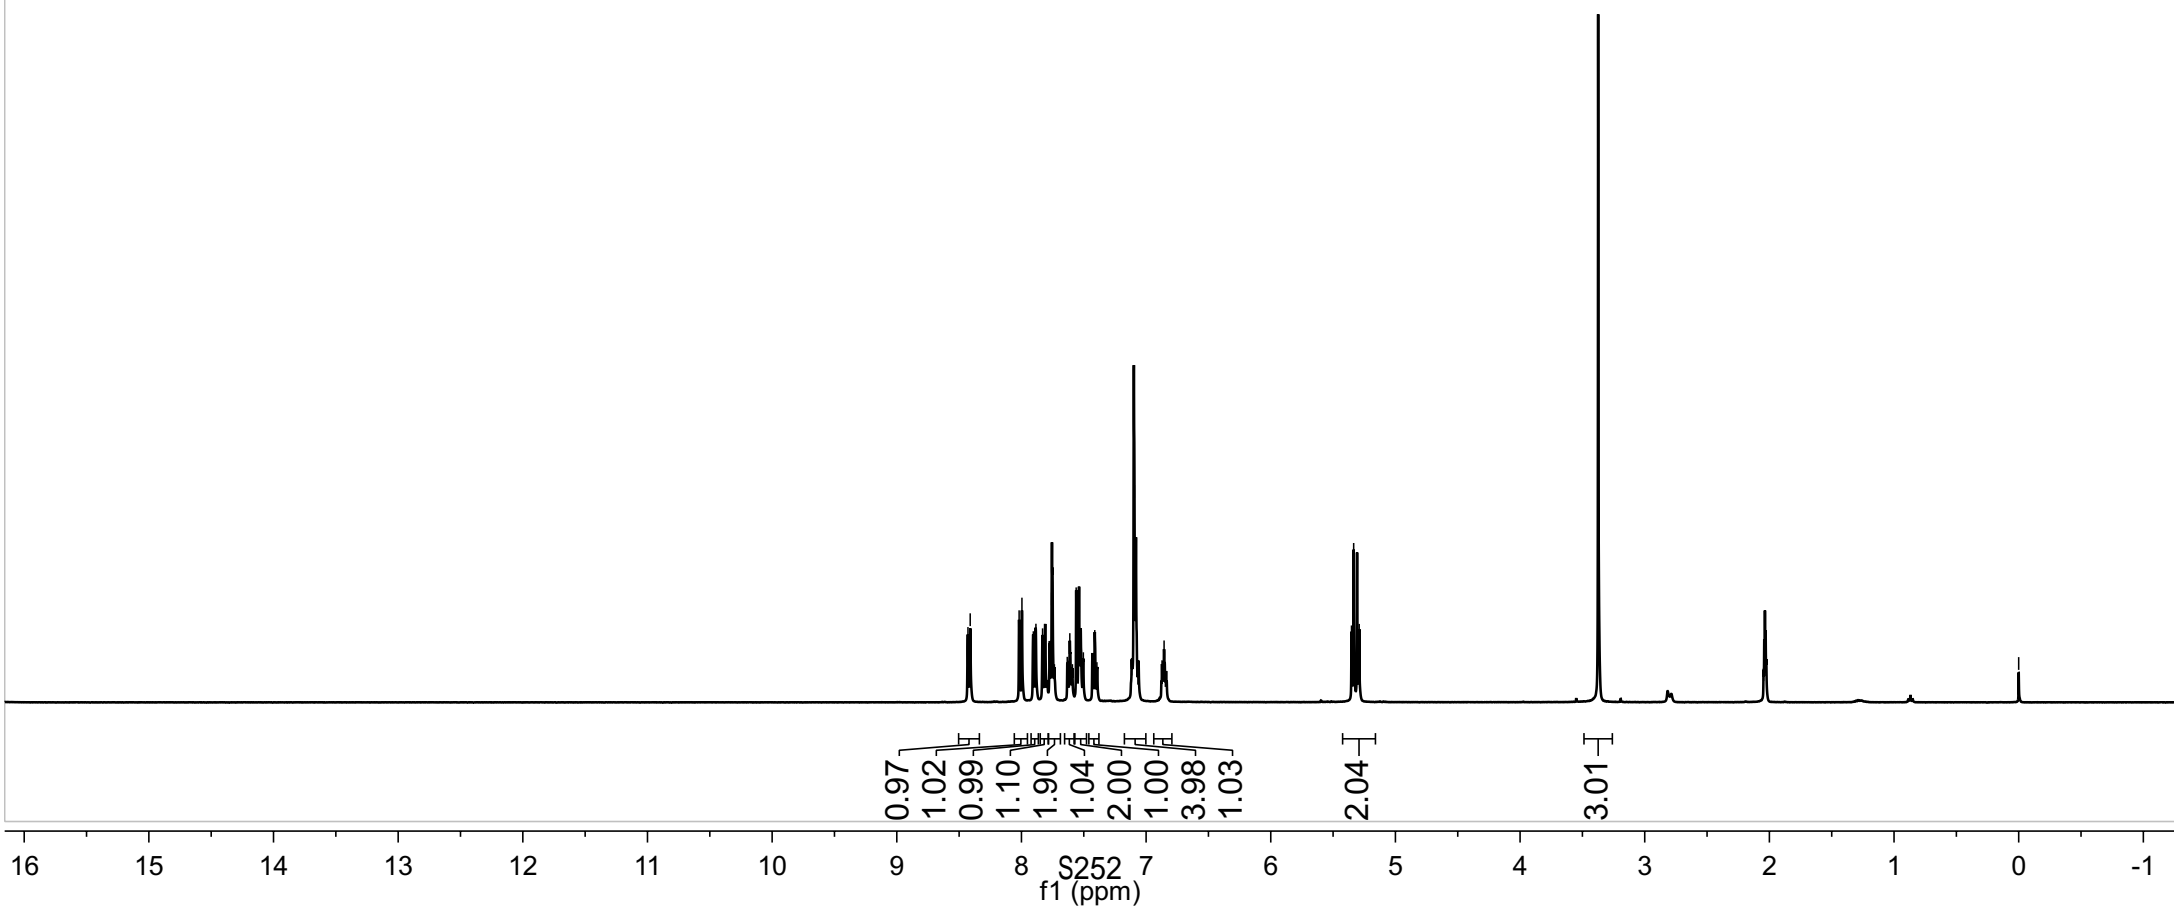

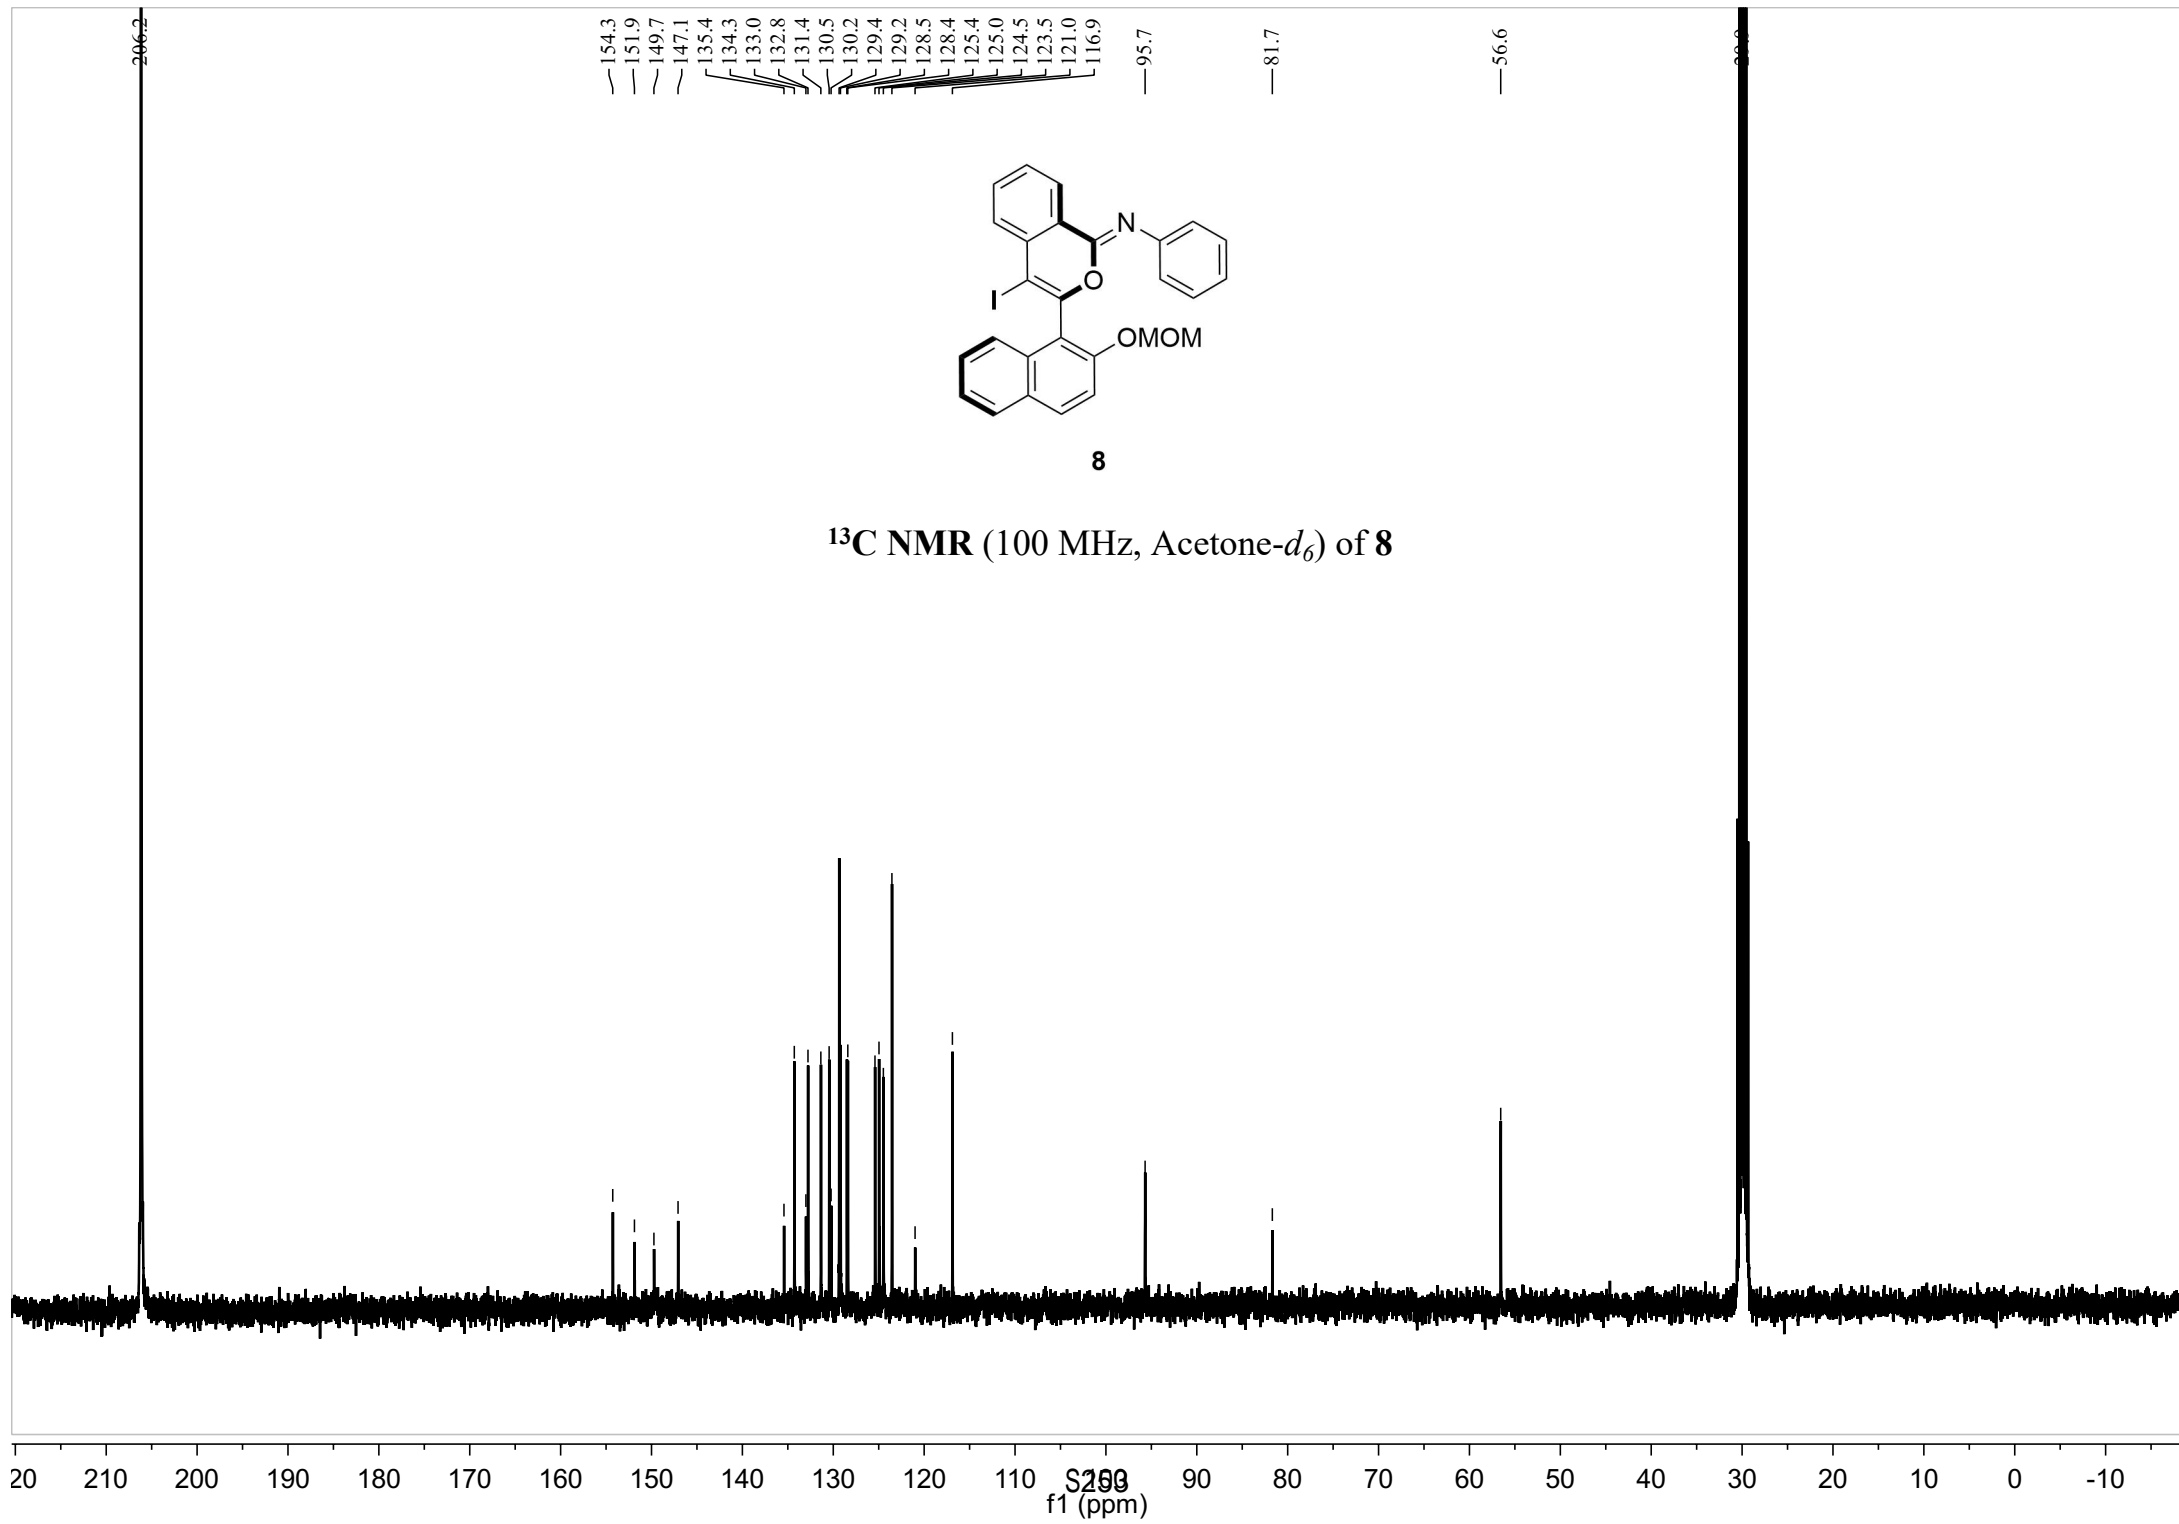

Supplement: d2ob00379a1.pdf [file d2ob00379a1.pdf]
